# Supplementary material for: Improved Access to Chiral Tetranaphthoazepinium-Based Organocatalysts Using Aqueous Ammonia as Nitrogen Source
Source: Molecules. 2019 Oct 25;24(21):3844. doi: 10.3390/molecules24213844 (PMC6864439; doi:10.3390/molecules24213844)
Supplement: Supplementary file 1 [file molecules-24-03844-s001.zip]

Archive with 4 entries (4 files):
- 1e_prime_CCDC_1956063.cif
- 7_tartrate_CCDC_1956064.cif
- molecules-621572-supplementary materials.pdf
- 1d_CCDC_1956062.cif
