# Supplementary material for: Improved Access to Chiral Tetranaphthoazepinium-Based Organocatalysts Using Aqueous Ammonia as Nitrogen Source
Source: Molecules. 2019 Oct 25;24(21):3844. doi: 10.3390/molecules24213844 (PMC6864439; doi:10.3390/molecules24213844)
Supplement: Supplementary file 1 [file molecules-24-03844-s001.zip › 1d_CCDC_1956062.cif]

data_miwi_dago6_p212121
_publ_requested_journal          Catalysts
_publ_contact_author_name        'Michael Widhalm'
_publ_contact_author_address     
;Institute of Chemical Catalysis
University of Vienna
Waehringerstr. 38
1090 Vienna
Austria
;
_publ_contact_author_email       m.widhalm@univie.ac.at
_publ_contact_author_phone       '+43 14277 70305'
loop_
_publ_author_name
_publ_author_address
'Manaprasertsak, Auraya'
;Department of Chemistry
Faculty of Science
Kasetsart University
Bangkok 10900
Thailand
;
'Tharamak, Sorachat'
;Department of Chemistry
Faculty of Science
Kasetsart University
Bangkok 10900
Thailand
;
'Schedl, Christina'
;Institute of Organic Chemistry
University of Vienna
Waehringerstr. 38 
1090 Vienna
Austria
;
'Roller, Alexander'
;Institute of Inorganic Chemistry
University of Vienna
Waehringerstr. 42 
1090 Vienna 
Austria
;
_audit_creation_date             2019-09-24
_audit_creation_method           
;
Olex2 1.2
(compiled 2018.05.29 svn.r3508 for OlexSys, GUI svn.r5506)
;

_audit_contact_author_address    ?
_audit_contact_author_email      ?
_audit_contact_author_phone      ?
_publ_contact_author_id_orcid    ?
_publ_section_references         
;
Dolomanov, O.V., Bourhis, L.J., Gildea, R.J, Howard, J.A.K. & Puschmann, H.
 (2009), J. Appl. Cryst. 42, 339-341.

Sheldrick, G.M. (2008). Acta Cryst. A64, 112-122.

Sheldrick, G.M. (2015). Acta Cryst. C71, 3-8.

C. B. Huebschle, G. M. Sheldrick and B. Dittrich
ShelXle: a Qt graphical user interface for SHELXL
J. Appl. Cryst., 44, (2011) 1281-1284.

A.L.Spek, Acta Cryst. 2009, D65, 148-155.
;
_chemical_name_systematic        
;
(11bR,11b'R)-2,6-Di([1,1':4',1''-terphenyl]-4-yl)-3,3',5,5'-
tetrahydro-4,4'-spirobi[dinaphtho[2,1-c:1',2'-e]azepin]-4-ium bromide 
;
_chemical_name_common            ?
_chemical_formula_moiety         'Br, Cl, 1.5(C H2 Cl2), C80 H56 N, C H2 Cl'
_chemical_formula_sum            'C82.50 H61 Br Cl5 N'
_chemical_formula_weight         1323.48
_space_group_crystal_system      orthorhombic
_space_group_IT_number           19
_space_group_name_H-M_alt        'P 21 21 21'
_space_group_name_Hall           'P 2ac 2ab'
_chemical_absolute_configuration syn
loop_
_space_group_symop_operation_xyz
'x, y, z'
'-x+1/2, -y, z+1/2'
'x+1/2, -y+1/2, -z'
'-x, y+1/2, -z+1/2'
_chemical_melting_point          ?
_exptl_crystal_description       block

_exptl_crystal_colour            'clear colourless'
_diffrn_ambient_temperature      150
loop_
_atom_type_symbol
_atom_type_description
_atom_type_scat_dispersion_real
_atom_type_scat_dispersion_imag
_atom_type_scat_source
C C 0.0033 0.0016 'International Tables Vol C Tables 4.2.6.8 and 6.1.1.4'
H H 0.0000 0.0000 'International Tables Vol C Tables 4.2.6.8 and 6.1.1.4'
Br Br -0.2901 2.4595 'International Tables Vol C Tables 4.2.6.8 and 6.1.1.4'
Cl Cl 0.1484 0.1585 'International Tables Vol C Tables 4.2.6.8 and 6.1.1.4'
N N 0.0061 0.0033 'International Tables Vol C Tables 4.2.6.8 and 6.1.1.4'

_shelx_space_group_comment       
;
The symmetry employed for this shelxl refinement is uniquely defined
by the following loop, which should always be used as a source of
symmetry information in preference to the above space-group names.
They are only intended as comments.
;

_cell_length_a                   9.1716(8)
_cell_length_b                   26.018(2)
_cell_length_c                   30.298(3)
_cell_angle_alpha                90
_cell_angle_beta                 90
_cell_angle_gamma                90
_cell_volume                     7229.8(11)
_cell_formula_units_Z            4
_cell_measurement_reflns_used    9875
_cell_measurement_temperature    150
_cell_measurement_theta_max      20.977
_cell_measurement_theta_min      2.320
_shelx_estimated_absorpt_T_max   0.917
_shelx_estimated_absorpt_T_min   0.796
_exptl_absorpt_coefficient_mu    0.797
_exptl_absorpt_correction_T_max  0.7460
_exptl_absorpt_correction_T_min  0.5297
_exptl_absorpt_correction_type   multi-scan
_exptl_absorpt_process_details   
;
SADABS-2016/2 (Bruker,2016/2) was used for absorption correction. 
wR2(int) was 0.1432 before and 0.0615 after correction. 
The Ratio of minimum to maximum transmission is 0.7101. 
The \l/2 correction factor is Not present.
;
_exptl_crystal_colour_lustre     clear
_exptl_crystal_colour_primary    colourless
_exptl_crystal_density_diffrn    1.216
_exptl_crystal_density_meas      ?
_exptl_crystal_density_method    ?
_exptl_crystal_F_000             2732
_exptl_crystal_size_max          0.3
_exptl_crystal_size_mid          0.14
_exptl_crystal_size_min          0.11
_exptl_transmission_factor_max   ?
_exptl_transmission_factor_min   ?
_diffrn_reflns_av_R_equivalents  0.1022
_diffrn_reflns_av_unetI/netI     0.0399
_diffrn_reflns_Laue_measured_fraction_full 0.999
_diffrn_reflns_Laue_measured_fraction_max 0.999
_diffrn_reflns_limit_h_max       11
_diffrn_reflns_limit_h_min       -11
_diffrn_reflns_limit_k_max       31
_diffrn_reflns_limit_k_min       -31
_diffrn_reflns_limit_l_max       36
_diffrn_reflns_limit_l_min       -36
_diffrn_reflns_number            217019
_diffrn_reflns_point_group_measured_fraction_full 0.999
_diffrn_reflns_point_group_measured_fraction_max 0.999
_diffrn_reflns_theta_full        25.242
_diffrn_reflns_theta_max         25.350
_diffrn_reflns_theta_min         1.032
_diffrn_detector_area_resol_mean ?
_diffrn_measured_fraction_theta_full 0.999
_diffrn_measured_fraction_theta_max 0.999
_diffrn_measurement_device_type  'Bruker APEX-II CCD'
_diffrn_measurement_method       '\f and \w scans'
_diffrn_radiation_probe          x-ray
_diffrn_radiation_type           MoK\a
_diffrn_radiation_wavelength     0.71073
_diffrn_source                   'sealed xray tube'
_diffrn_source_type              'Incoatec IuS'
_diffrn_special_details          ?
_diffrn_standards_number         0
_reflns_Friedel_coverage         0.803
_reflns_Friedel_fraction_full    1.000
_reflns_Friedel_fraction_max     1.000
_reflns_number_gt                11261
_reflns_number_total             13222
_reflns_special_details          
;
 Reflections were merged by SHELXL according to the crystal
 class for the calculation of statistics and refinement.
 
 Structure factors included contributions from the .fab file.
 
 _reflns_Friedel_fraction is defined as the number of unique
 Friedel pairs measured divided by the number that would be
 possible theoretically, ignoring centric projections and
 systematic absences.
;
_reflns_threshold_expression     'I > 2\s(I)'
_computing_cell_refinement       'SAINT V8.38A (?, 2016)'
_computing_data_collection       'APEX3'
_computing_data_reduction        'SAINT V8.38A (?, 2016)'
_computing_molecular_graphics    'Olex2 (Dolomanov et al., 2009)'
_computing_publication_material  'Olex2 (Dolomanov et al., 2009)'
_computing_structure_refinement  'XL (Sheldrick, 2008)'
_computing_structure_solution    'XS (Sheldrick, 2008)'
_refine_diff_density_max         1.907
_refine_diff_density_min         -0.990
_refine_diff_density_rms         0.166
_refine_ls_abs_structure_details 
;
 Flack x determined using 4343 quotients [(I+)-(I-)]/[(I+)+(I-)]
 (Parsons, Flack and Wagner, Acta Cryst. B69 (2013) 249-259).
;
_refine_ls_abs_structure_Flack   0.119(4)
_refine_ls_extinction_coef       .
_refine_ls_extinction_method     none
_refine_ls_goodness_of_fit_ref   1.060
_refine_ls_hydrogen_treatment    constr
_refine_ls_matrix_type           full
_refine_ls_number_parameters     808
_refine_ls_number_reflns         13222
_refine_ls_number_restraints     0
_refine_ls_R_factor_all          0.0977
_refine_ls_R_factor_gt           0.0831
_refine_ls_restrained_S_all      1.060
_refine_ls_shift/su_max          0.001
_refine_ls_shift/su_mean         0.000
_refine_ls_structure_factor_coef Fsqd
_refine_ls_weighting_details     
'w=1/[\s^2^(Fo^2^)+(0.1599P)^2^+16.0070P] where P=(Fo^2^+2Fc^2^)/3'
_refine_ls_weighting_scheme      calc
_refine_ls_wR_factor_gt          0.2318
_refine_ls_wR_factor_ref         0.2478
_refine_special_details          
;
_olex2_refinement_description
1. Fixed Uiso
 At 1.2 times of:
  All C(H) groups, All C(H,H) groups
2. Uiso/Uaniso restraints and constraints
Uanis(C88) = Uanis(C87) = Uanis(C86) = Uanis(C85) = Uanis(C84) = Uanis(C83)
3. Others
 Fixed Sof: Cl4S(0.5) Cl7S(0.5) Cl8S(0.5) C3S(0.5) H3SA(0.5) H3SB(0.5)
 Cl1S(0.5) Cl2S(0.5) Cl3S(0.5)
4.a Secondary CH2 refined with riding coordinates:
 C2S(H2SA,H2SB), C3S(H3SA,H3SB), C11(H11A,H11B), C12(H12A,H12B), C13(H13A,
 H13B), C14(H14A,H14B), C1S(H1SA,H1SB)
4.b Aromatic/amide H refined with riding coordinates:
 C24(H24), C26(H26), C27(H27), C28(H28), C29(H29), C32(H32), C33(H33),
 C35(H35), C36(H36), C38(H38), C39(H39), C41(H41), C42(H42), C44(H44), C45(H45),
  C46(H46), C47(H47), C48(H48), C64(H64), C66(H66), C67(H67), C68(H68),
 C69(H69), C72(H72), C73(H73), C75(H75), C76(H76), C78(H78), C79(H79), C81(H81),
  C82(H82), C84(H84), C85(H85), C86(H86), C87(H87), C88(H88), C93(H93),
 C94(H94), C96(H96), C97(H97), C98(H98), C99(H99), C103(H103), C104(H104),
 C106(H106), C107(H107), C108(H108), C109(H109)
_smtbx_masks_special_details       ?
loop_
  _smtbx_masks_void_nr
  _smtbx_masks_void_average_x
  _smtbx_masks_void_average_y
  _smtbx_masks_void_average_z
  _smtbx_masks_void_volume
  _smtbx_masks_void_count_electrons
  _smtbx_masks_void_content
 1 0.038 -0.054 0.138 158.6 42.9 ?
 2 -0.038 0.446 0.362 158.6 43.6 ?
 3 -0.084 0.424 0.146 17.4 4.8 ?
 4 0.084 0.924 0.354 17.4 5.3 ?
 5 0.462 0.054 0.638 158.6 43.3 ?
 6 0.538 0.554 0.862 158.6 42.4 ?
 7 0.416 0.076 0.854 17.4 5.3 ?
 8 0.584 0.576 0.646 17.4 5.7 ?
;
_atom_sites_solution_hydrogens   geom
_atom_sites_solution_primary     direct
_atom_sites_solution_secondary   ?
loop_
_atom_site_label
_atom_site_type_symbol
_atom_site_fract_x
_atom_site_fract_y
_atom_site_fract_z
_atom_site_U_iso_or_equiv
_atom_site_adp_type
_atom_site_occupancy
_atom_site_site_symmetry_order
_atom_site_calc_flag
_atom_site_refinement_flags_posn
_atom_site_refinement_flags_adp
_atom_site_refinement_flags_occupancy
_atom_site_disorder_assembly
_atom_site_disorder_group
Br1 Br 0.69877(11) 0.70117(4) 0.63401(4) 0.0453(3) Uani 1 1 d . . . . .
Cl4S Cl 0.6911(12) 0.3008(3) 0.2773(3) 0.098(3) Uani 0.5 1 d . . P . .
Cl5S Cl 0.1109(3) 0.61694(13) 0.34234(11) 0.0641(9) Uani 1 1 d . . . . .
Cl6S Cl -0.0091(4) 0.69610(13) 0.28510(11) 0.0702(9) Uani 1 1 d . . . . .
C2S C 0.1293(15) 0.6789(6) 0.3246(6) 0.082(5) Uani 1 1 d . . . . .
H2SA H 0.226543 0.683247 0.310924 0.098 Uiso 1 1 calc R . . . .
H2SB H 0.123271 0.702334 0.350242 0.098 Uiso 1 1 calc R . . . .
Cl7S Cl 0.8724(7) 0.3069(2) 0.4326(2) 0.0568(14) Uani 0.5 1 d . . P . .
Cl8S Cl 1.0089(11) 0.2526(2) 0.3597(4) 0.128(5) Uani 0.5 1 d . . P . .
C3S C 0.859(2) 0.2599(8) 0.3921(9) 0.055(6) Uani 0.5 1 d . . P . .
H3SA H 0.838587 0.226647 0.406672 0.065 Uiso 0.5 1 calc R . P . .
H3SB H 0.775189 0.268173 0.372973 0.065 Uiso 0.5 1 calc R . P . .
N1 N 0.3401(6) 0.5267(2) 0.52691(19) 0.0125(12) Uani 1 1 d . . . . .
C11 C 0.2641(8) 0.4778(3) 0.5430(3) 0.0189(15) Uani 1 1 d . . . . .
H11A H 0.159338 0.485234 0.547690 0.023 Uiso 1 1 calc R . . . .
H11B H 0.271556 0.451124 0.519840 0.023 Uiso 1 1 calc R . . . .
C12 C 0.3662(7) 0.5665(3) 0.5631(2) 0.0138(14) Uani 1 1 d . . . . .
H12A H 0.454592 0.556632 0.579834 0.017 Uiso 1 1 calc R . . . .
H12B H 0.385625 0.600200 0.549078 0.017 Uiso 1 1 calc R . . . .
C13 C 0.4910(7) 0.5144(3) 0.5077(2) 0.0141(14) Uani 1 1 d . . . . .
H13A H 0.546613 0.546795 0.504740 0.017 Uiso 1 1 calc R . . . .
H13B H 0.544102 0.492218 0.528912 0.017 Uiso 1 1 calc R . . . .
C14 C 0.2404(8) 0.5490(3) 0.4911(2) 0.0193(15) Uani 1 1 d . . . . .
H14A H 0.201831 0.520323 0.473019 0.023 Uiso 1 1 calc R . . . .
H14B H 0.156489 0.566013 0.505479 0.023 Uiso 1 1 calc R . . . .
C21 C 0.3085(8) 0.4857(3) 0.6237(2) 0.0165(14) Uani 1 1 d . . . . .
C22 C 0.3286(7) 0.4570(3) 0.5856(2) 0.0152(14) Uani 1 1 d . . . . .
C23 C 0.4051(8) 0.4088(3) 0.5871(2) 0.0169(14) Uani 1 1 d . . . . .
C24 C 0.4729(8) 0.3948(3) 0.6264(3) 0.0206(16) Uani 1 1 d . . . . .
H24 H 0.523409 0.363013 0.627878 0.025 Uiso 1 1 calc R . . . .
C25 C 0.4687(8) 0.4270(3) 0.6647(3) 0.0216(16) Uani 1 1 d . . . . .
C26 C 0.5452(9) 0.4134(3) 0.7028(3) 0.0276(18) Uani 1 1 d . . . . .
H26 H 0.599920 0.382387 0.703328 0.033 Uiso 1 1 calc R . . . .
C27 C 0.5422(10) 0.4446(4) 0.7399(3) 0.0314(19) Uani 1 1 d . . . . .
H27 H 0.596329 0.435542 0.765494 0.038 Uiso 1 1 calc R . . . .
C28 C 0.4572(9) 0.4901(3) 0.7391(3) 0.0263(17) Uani 1 1 d . . . . .
H28 H 0.452311 0.511125 0.764717 0.032 Uiso 1 1 calc R . . . .
C29 C 0.3819(8) 0.5043(3) 0.7018(2) 0.0202(15) Uani 1 1 d . . . . .
H29 H 0.326741 0.535185 0.701719 0.024 Uiso 1 1 calc R . . . .
C30 C 0.3857(8) 0.4735(3) 0.6638(2) 0.0182(15) Uani 1 1 d . . . . .
C31 C 0.4095(9) 0.3716(3) 0.5503(3) 0.0217(16) Uani 1 1 d . . . . .
C32 C 0.2889(9) 0.3612(3) 0.5238(3) 0.0245(16) Uani 1 1 d . . . . .
H32 H 0.198561 0.377668 0.529775 0.029 Uiso 1 1 calc R . . . .
C33 C 0.2998(10) 0.3264(3) 0.4880(3) 0.0290(18) Uani 1 1 d . . . . .
H33 H 0.216990 0.320088 0.469918 0.035 Uiso 1 1 calc R . . . .
C34 C 0.4287(10) 0.3016(3) 0.4790(3) 0.0310(19) Uani 1 1 d . . . . .
C35 C 0.5463(10) 0.3089(3) 0.5075(3) 0.0300(19) Uani 1 1 d . . . . .
H35 H 0.632877 0.289501 0.503157 0.036 Uiso 1 1 calc R . . . .
C36 C 0.5397(9) 0.3438(3) 0.5423(3) 0.0222(16) Uani 1 1 d . . . . .
H36 H 0.622504 0.349044 0.560588 0.027 Uiso 1 1 calc R . . . .
C37 C 0.4432(11) 0.2686(3) 0.4399(3) 0.034(2) Uani 1 1 d . . . . .
C38 C 0.3766(14) 0.2837(4) 0.3995(4) 0.049(3) Uani 1 1 d . . . . .
H38 H 0.316492 0.313445 0.399096 0.059 Uiso 1 1 calc R . . . .
C39 C 0.3965(14) 0.2567(4) 0.3611(4) 0.049(3) Uani 1 1 d . . . . .
H39 H 0.356080 0.268640 0.334139 0.059 Uiso 1 1 calc R . . . .
C40 C 0.4817(10) 0.2091(3) 0.3626(3) 0.0309(19) Uani 1 1 d . . . . .
C41 C 0.5385(12) 0.1952(4) 0.4014(3) 0.041(2) Uani 1 1 d . . . . .
H41 H 0.592770 0.164188 0.402942 0.050 Uiso 1 1 calc R . . . .
C42 C 0.5218(11) 0.2244(3) 0.4400(3) 0.038(2) Uani 1 1 d . . . . .
H42 H 0.566187 0.213076 0.466638 0.045 Uiso 1 1 calc R . . . .
C43 C 0.5002(9) 0.1793(3) 0.3213(3) 0.0256(17) Uani 1 1 d . . . . .
C44 C 0.3871(10) 0.1745(3) 0.2917(3) 0.0281(18) Uani 1 1 d . . . . .
H44 H 0.295262 0.189437 0.298386 0.034 Uiso 1 1 calc R . . . .
C45 C 0.4051(11) 0.1484(3) 0.2526(3) 0.033(2) Uani 1 1 d . . . . .
H45 H 0.326097 0.145531 0.232508 0.039 Uiso 1 1 calc R . . . .
C46 C 0.5400(10) 0.1259(3) 0.2424(3) 0.0287(19) Uani 1 1 d . . . . .
H46 H 0.552288 0.108369 0.215206 0.034 Uiso 1 1 calc R . . . .
C47 C 0.6555(10) 0.1292(3) 0.2718(3) 0.0315(19) Uani 1 1 d . . . . .
H47 H 0.746170 0.113372 0.265107 0.038 Uiso 1 1 calc R . . . .
C48 C 0.6371(11) 0.1558(3) 0.3112(3) 0.0314(19) Uani 1 1 d . . . . .
H48 H 0.715822 0.158468 0.331418 0.038 Uiso 1 1 calc R . . . .
C61 C 0.2106(8) 0.5319(3) 0.6236(2) 0.0162(14) Uani 1 1 d . . . . .
C62 C 0.2403(7) 0.5725(3) 0.5953(3) 0.0185(15) Uani 1 1 d . . . . .
C63 C 0.1583(7) 0.6182(3) 0.5980(2) 0.0164(14) Uani 1 1 d . . . . .
C64 C 0.0413(8) 0.6207(3) 0.6275(3) 0.0252(17) Uani 1 1 d . . . . .
H64 H -0.013252 0.651670 0.629912 0.030 Uiso 1 1 calc R . . . .
C65 C 0.0035(9) 0.5786(3) 0.6535(3) 0.0267(18) Uani 1 1 d . . . . .
C66 C -0.1178(11) 0.5818(4) 0.6838(4) 0.044(3) Uani 1 1 d . . . . .
H66 H -0.171288 0.612845 0.686731 0.052 Uiso 1 1 calc R . . . .
C67 C -0.1554(11) 0.5388(4) 0.7086(4) 0.053(3) Uani 1 1 d . . . . .
H67 H -0.235093 0.540682 0.728508 0.063 Uiso 1 1 calc R . . . .
C68 C -0.0786(10) 0.4935(3) 0.7046(3) 0.035(2) Uani 1 1 d . . . . .
H68 H -0.110674 0.464031 0.720425 0.042 Uiso 1 1 calc R . . . .
C69 C 0.0427(9) 0.4898(3) 0.6784(3) 0.0275(18) Uani 1 1 d . . . . .
H69 H 0.097200 0.458808 0.677716 0.033 Uiso 1 1 calc R . . . .
C70 C 0.0869(8) 0.5324(3) 0.6525(3) 0.0221(16) Uani 1 1 d . . . . .
C71 C 0.1964(8) 0.6667(2) 0.5744(2) 0.0146(14) Uani 1 1 d . . . . .
C72 C 0.3359(7) 0.6892(3) 0.5800(2) 0.0133(13) Uani 1 1 d . . . . .
H72 H 0.410028 0.671272 0.595536 0.016 Uiso 1 1 calc R . . . .
C73 C 0.3635(7) 0.7376(3) 0.5627(2) 0.0151(14) Uani 1 1 d . . . . .
H73 H 0.456631 0.752710 0.567043 0.018 Uiso 1 1 calc R . . . .
C74 C 0.2568(8) 0.7646(3) 0.5390(2) 0.0156(14) Uani 1 1 d . . . . .
C75 C 0.1206(8) 0.7412(3) 0.5329(2) 0.0160(14) Uani 1 1 d . . . . .
H75 H 0.047851 0.758406 0.516119 0.019 Uiso 1 1 calc R . . . .
C76 C 0.0906(7) 0.6940(3) 0.5507(2) 0.0177(15) Uani 1 1 d . . . . .
H76 H -0.003578 0.679491 0.546843 0.021 Uiso 1 1 calc R . . . .
C77 C 0.2840(7) 0.8175(3) 0.5229(2) 0.0157(14) Uani 1 1 d . . . . .
C78 C 0.3698(8) 0.8520(3) 0.5473(3) 0.0206(16) Uani 1 1 d . . . . .
H78 H 0.414028 0.840703 0.573968 0.025 Uiso 1 1 calc R . . . .
C79 C 0.3911(8) 0.9017(3) 0.5334(3) 0.0200(15) Uani 1 1 d . . . . .
H79 H 0.448781 0.924395 0.550667 0.024 Uiso 1 1 calc R . . . .
C80 C 0.3287(8) 0.9194(3) 0.4940(3) 0.0239(17) Uani 1 1 d . . . . .
C81 C 0.2478(8) 0.8851(3) 0.4692(3) 0.0214(16) Uani 1 1 d . . . . .
H81 H 0.208191 0.895996 0.441806 0.026 Uiso 1 1 calc R . . . .
C82 C 0.2232(8) 0.8354(3) 0.4834(3) 0.0190(15) Uani 1 1 d . . . . .
H82 H 0.164273 0.813137 0.466136 0.023 Uiso 1 1 calc R . . . .
C83 C 0.3490(11) 0.9739(4) 0.4797(5) 0.0529(14) Uani 1 1 d . . . . .
C84 C 0.3742(11) 1.0127(4) 0.5101(5) 0.0529(14) Uani 1 1 d . . . . .
H84 H 0.380211 1.004882 0.540654 0.063 Uiso 1 1 calc R . . . .
C85 C 0.3910(11) 1.0642(4) 0.4953(5) 0.0529(14) Uani 1 1 d . . . . .
H85 H 0.410547 1.090588 0.516124 0.063 Uiso 1 1 calc R . . . .
C86 C 0.3797(11) 1.0760(4) 0.4523(5) 0.0529(14) Uani 1 1 d . . . . .
H86 H 0.391411 1.110692 0.443114 0.063 Uiso 1 1 calc R . . . .
C87 C 0.3516(11) 1.0390(4) 0.4219(5) 0.0529(14) Uani 1 1 d . . . . .
H87 H 0.340065 1.048420 0.391845 0.063 Uiso 1 1 calc R . . . .
C88 C 0.3391(10) 0.9868(4) 0.4341(5) 0.0529(14) Uani 1 1 d . . . . .
H88 H 0.324405 0.960908 0.412425 0.063 Uiso 1 1 calc R . . . .
C91 C 0.4510(8) 0.5155(3) 0.4260(2) 0.0169(15) Uani 1 1 d . . . . .
C92 C 0.4874(8) 0.4883(3) 0.4643(2) 0.0181(15) Uani 1 1 d . . . . .
C93 C 0.5333(9) 0.4363(3) 0.4602(3) 0.0247(17) Uani 1 1 d . . . . .
H93 H 0.562459 0.418177 0.485911 0.030 Uiso 1 1 calc R . . . .
C94 C 0.5370(12) 0.4119(3) 0.4210(3) 0.036(2) Uani 1 1 d . . . . .
H94 H 0.572603 0.377668 0.419349 0.043 Uiso 1 1 calc R . . . .
C95 C 0.4878(13) 0.4372(4) 0.3823(3) 0.040(2) Uani 1 1 d . . . . .
C96 C 0.4853(17) 0.4115(4) 0.3402(3) 0.058(4) Uani 1 1 d . . . . .
H96 H 0.522102 0.377530 0.337632 0.069 Uiso 1 1 calc R . . . .
C97 C 0.4307(18) 0.4357(4) 0.3043(4) 0.063(4) Uani 1 1 d . . . . .
H97 H 0.422189 0.417546 0.277266 0.075 Uiso 1 1 calc R . . . .
C98 C 0.3871(13) 0.4865(4) 0.3065(3) 0.042(2) Uani 1 1 d . . . . .
H98 H 0.353456 0.503451 0.280616 0.051 Uiso 1 1 calc R . . . .
C99 C 0.3924(10) 0.5128(3) 0.3461(3) 0.0297(19) Uani 1 1 d . . . . .
H99 H 0.359155 0.547347 0.347079 0.036 Uiso 1 1 calc R . . . .
C100 C 0.4447(9) 0.4902(3) 0.3843(3) 0.0256(17) Uani 1 1 d . . . . .
C101 C 0.4174(8) 0.5702(3) 0.4305(2) 0.0186(15) Uani 1 1 d . . . . .
C102 C 0.3131(8) 0.5867(3) 0.4612(2) 0.0171(14) Uani 1 1 d . . . . .
C103 C 0.2688(8) 0.6392(3) 0.4627(2) 0.0196(15) Uani 1 1 d . . . . .
H103 H 0.196963 0.649564 0.483468 0.024 Uiso 1 1 calc R . . . .
C104 C 0.3276(9) 0.6751(3) 0.4348(3) 0.0222(16) Uani 1 1 d . . . . .
H104 H 0.291616 0.709326 0.434552 0.027 Uiso 1 1 calc R . . . .
C105 C 0.4443(8) 0.6603(3) 0.4058(2) 0.0178(15) Uani 1 1 d . . . . .
C106 C 0.5133(9) 0.6980(3) 0.3795(2) 0.0252(17) Uani 1 1 d . . . . .
H106 H 0.477140 0.732246 0.378899 0.030 Uiso 1 1 calc R . . . .
C107 C 0.6327(11) 0.6848(3) 0.3548(3) 0.0308(19) Uani 1 1 d . . . . .
H107 H 0.678446 0.710165 0.336940 0.037 Uiso 1 1 calc R . . . .
C108 C 0.6887(10) 0.6349(3) 0.3552(3) 0.0278(17) Uani 1 1 d . . . . .
H108 H 0.775412 0.627062 0.339408 0.033 Uiso 1 1 calc R . . . .
C109 C 0.6162(9) 0.5962(3) 0.3791(2) 0.0204(15) Uani 1 1 d . . . . .
H109 H 0.651104 0.561853 0.378195 0.024 Uiso 1 1 calc R . . . .
C110 C 0.4913(8) 0.6084(3) 0.4045(2) 0.0184(15) Uani 1 1 d . . . . .
C1S C 0.3411(14) 0.6529(6) 0.7011(4) 0.067(4) Uani 1 1 d . . . . .
H1SA H 0.301035 0.623719 0.684035 0.080 Uiso 1 1 calc R . . A .
H1SB H 0.409875 0.672217 0.682197 0.080 Uiso 1 1 calc R . . A .
Cl1S Cl 0.4308(15) 0.6304(3) 0.7502(3) 0.104(3) Uani 0.5 1 d . . P B 1
Cl2S Cl 0.1846(12) 0.6976(3) 0.7219(3) 0.085(2) Uani 0.5 1 d . . P B 1
Cl3S Cl 0.0643(15) 0.7019(3) 0.7342(3) 0.100(3) Uani 0.5 1 d . . P C 2

loop_
_atom_site_aniso_label
_atom_site_aniso_U_11
_atom_site_aniso_U_22
_atom_site_aniso_U_33
_atom_site_aniso_U_23
_atom_site_aniso_U_13
_atom_site_aniso_U_12
Br1 0.0411(5) 0.0420(6) 0.0529(6) 0.0010(5) -0.0057(4) 0.0042(4)
Cl4S 0.144(8) 0.063(4) 0.088(5) 0.005(4) 0.067(6) -0.010(5)
Cl5S 0.0455(15) 0.075(2) 0.072(2) -0.0280(16) -0.0192(14) 0.0141(14)
Cl6S 0.090(2) 0.0517(17) 0.069(2) -0.0068(15) 0.0008(17) -0.0192(17)
C2S 0.052(7) 0.076(10) 0.118(13) -0.049(9) -0.006(8) -0.015(7)
Cl7S 0.059(3) 0.036(3) 0.075(4) -0.013(3) 0.004(3) -0.014(2)
Cl8S 0.134(7) 0.022(3) 0.227(12) 0.019(4) 0.134(8) 0.009(3)
C3S 0.031(10) 0.038(11) 0.095(18) 0.000(12) 0.025(11) -0.003(9)
N1 0.008(3) 0.014(3) 0.016(3) 0.000(2) -0.001(2) 0.000(2)
C11 0.019(4) 0.010(3) 0.027(4) 0.005(3) -0.006(3) -0.001(3)
C12 0.012(3) 0.013(3) 0.017(3) -0.001(3) -0.002(3) -0.004(3)
C13 0.006(3) 0.016(3) 0.020(4) 0.002(3) 0.000(3) 0.002(3)
C14 0.017(3) 0.022(4) 0.019(4) 0.006(3) -0.004(3) 0.002(3)
C21 0.014(3) 0.012(3) 0.024(4) 0.001(3) 0.002(3) -0.004(3)
C22 0.011(3) 0.017(3) 0.017(3) 0.001(3) -0.002(3) -0.002(3)
C23 0.022(4) 0.016(4) 0.013(3) 0.002(3) -0.002(3) -0.006(3)
C24 0.021(4) 0.017(4) 0.024(4) 0.005(3) 0.000(3) 0.003(3)
C25 0.022(4) 0.021(4) 0.022(4) 0.003(3) 0.005(3) 0.003(3)
C26 0.028(4) 0.028(4) 0.026(4) 0.007(3) 0.001(3) 0.007(3)
C27 0.032(5) 0.040(5) 0.022(4) 0.004(4) -0.002(3) 0.003(4)
C28 0.025(4) 0.034(5) 0.020(4) 0.002(3) 0.004(3) -0.001(3)
C29 0.023(4) 0.018(4) 0.020(4) 0.003(3) 0.001(3) 0.003(3)
C30 0.014(3) 0.021(4) 0.020(4) 0.003(3) 0.003(3) -0.004(3)
C31 0.029(4) 0.010(3) 0.026(4) 0.003(3) 0.001(3) 0.003(3)
C32 0.030(4) 0.015(4) 0.029(4) -0.006(3) 0.002(3) 0.000(3)
C33 0.038(5) 0.023(4) 0.027(4) -0.006(3) -0.004(4) -0.005(4)
C34 0.053(5) 0.010(3) 0.030(4) 0.002(3) 0.003(4) -0.010(4)
C35 0.043(5) 0.018(4) 0.030(4) 0.000(3) 0.005(4) 0.006(3)
C36 0.026(4) 0.012(3) 0.028(4) -0.004(3) -0.004(3) 0.003(3)
C37 0.047(5) 0.023(4) 0.034(5) -0.009(4) -0.007(4) -0.003(4)
C38 0.066(7) 0.030(5) 0.052(6) -0.007(5) -0.014(6) 0.011(5)
C39 0.078(8) 0.025(5) 0.044(6) -0.004(4) -0.022(6) 0.011(5)
C40 0.039(5) 0.020(4) 0.034(5) 0.000(4) 0.007(4) -0.008(3)
C41 0.054(6) 0.024(5) 0.046(6) -0.004(4) -0.009(5) 0.012(4)
C42 0.048(6) 0.027(5) 0.039(5) 0.002(4) -0.010(4) 0.006(4)
C43 0.034(4) 0.018(4) 0.024(4) 0.003(3) -0.001(3) -0.003(3)
C44 0.039(5) 0.021(4) 0.025(4) -0.004(3) 0.003(4) -0.001(4)
C45 0.046(5) 0.026(4) 0.026(4) -0.002(3) 0.002(4) -0.009(4)
C46 0.051(5) 0.015(4) 0.020(4) 0.001(3) 0.008(4) 0.003(4)
C47 0.044(5) 0.020(4) 0.031(4) 0.002(3) 0.007(4) 0.008(4)
C48 0.043(5) 0.022(4) 0.030(4) 0.003(3) -0.005(4) 0.005(4)
C61 0.014(3) 0.016(3) 0.019(4) 0.001(3) 0.002(3) -0.003(3)
C62 0.014(3) 0.018(4) 0.024(4) 0.004(3) -0.002(3) -0.005(3)
C63 0.014(3) 0.014(3) 0.021(4) 0.001(3) 0.001(3) -0.007(3)
C64 0.021(4) 0.019(4) 0.036(5) 0.001(3) 0.007(3) 0.004(3)
C65 0.022(4) 0.015(4) 0.043(5) 0.005(3) 0.015(4) 0.002(3)
C66 0.035(5) 0.030(5) 0.066(7) 0.014(5) 0.030(5) 0.010(4)
C67 0.040(5) 0.034(5) 0.084(8) 0.024(6) 0.037(6) 0.008(4)
C68 0.029(4) 0.024(4) 0.053(6) 0.022(4) 0.017(4) 0.005(4)
C69 0.024(4) 0.022(4) 0.037(5) 0.010(4) 0.003(4) -0.003(3)
C70 0.021(4) 0.015(4) 0.031(4) 0.007(3) 0.003(3) 0.000(3)
C71 0.016(3) 0.007(3) 0.021(3) 0.003(3) 0.003(3) 0.003(3)
C72 0.007(3) 0.017(3) 0.017(3) 0.001(3) 0.002(2) 0.003(2)
C73 0.009(3) 0.015(3) 0.022(4) -0.003(3) 0.006(3) 0.001(3)
C74 0.020(3) 0.016(3) 0.011(3) -0.002(3) 0.001(3) 0.000(3)
C75 0.013(3) 0.019(4) 0.016(3) -0.004(3) 0.000(3) 0.005(3)
C76 0.008(3) 0.019(4) 0.026(4) -0.006(3) 0.001(3) -0.003(3)
C77 0.007(3) 0.017(3) 0.023(4) -0.002(3) 0.005(3) 0.002(3)
C78 0.017(3) 0.021(4) 0.023(4) 0.002(3) 0.011(3) 0.000(3)
C79 0.018(3) 0.016(4) 0.025(4) 0.000(3) 0.006(3) -0.006(3)
C80 0.012(3) 0.018(4) 0.042(5) 0.007(3) 0.011(3) 0.003(3)
C81 0.015(3) 0.019(4) 0.030(4) 0.012(3) 0.006(3) 0.009(3)
C82 0.016(3) 0.015(3) 0.027(4) 0.004(3) 0.005(3) 0.004(3)
C83 0.0283(19) 0.023(2) 0.107(4) 0.026(2) 0.026(2) 0.0071(16)
C84 0.0283(19) 0.023(2) 0.107(4) 0.026(2) 0.026(2) 0.0071(16)
C85 0.0283(19) 0.023(2) 0.107(4) 0.026(2) 0.026(2) 0.0071(16)
C86 0.0283(19) 0.023(2) 0.107(4) 0.026(2) 0.026(2) 0.0071(16)
C87 0.0283(19) 0.023(2) 0.107(4) 0.026(2) 0.026(2) 0.0071(16)
C88 0.0283(19) 0.023(2) 0.107(4) 0.026(2) 0.026(2) 0.0071(16)
C91 0.016(3) 0.020(4) 0.014(3) 0.002(3) -0.006(3) -0.005(3)
C92 0.018(3) 0.021(4) 0.015(4) 0.000(3) 0.002(3) -0.003(3)
C93 0.033(4) 0.015(4) 0.027(4) 0.006(3) 0.004(3) 0.002(3)
C94 0.059(6) 0.022(4) 0.026(4) 0.000(4) 0.004(4) -0.001(4)
C95 0.070(7) 0.024(4) 0.027(5) -0.003(4) -0.002(5) 0.000(5)
C96 0.131(12) 0.023(5) 0.018(5) -0.004(4) -0.005(6) 0.008(6)
C97 0.123(12) 0.037(6) 0.027(5) -0.006(4) -0.006(6) -0.016(7)
C98 0.069(7) 0.034(5) 0.025(5) -0.001(4) -0.011(5) -0.014(5)
C99 0.040(5) 0.020(4) 0.029(4) 0.002(3) -0.014(4) -0.008(4)
C100 0.032(4) 0.020(4) 0.025(4) -0.002(3) -0.001(3) -0.005(3)
C101 0.018(3) 0.019(4) 0.019(4) 0.005(3) -0.006(3) 0.001(3)
C102 0.017(3) 0.015(3) 0.020(3) 0.005(3) -0.011(3) -0.004(3)
C103 0.027(4) 0.020(4) 0.012(3) 0.000(3) -0.003(3) 0.000(3)
C104 0.028(4) 0.015(4) 0.024(4) -0.001(3) -0.006(3) 0.000(3)
C105 0.024(4) 0.006(3) 0.024(4) 0.001(3) -0.008(3) -0.003(3)
C106 0.043(5) 0.017(4) 0.015(4) -0.002(3) -0.003(3) -0.014(4)
C107 0.049(5) 0.023(4) 0.021(4) 0.004(3) -0.005(4) -0.011(4)
C108 0.035(4) 0.031(4) 0.017(4) -0.004(3) -0.003(3) -0.005(4)
C109 0.027(4) 0.020(4) 0.014(3) -0.001(3) -0.004(3) -0.005(3)
C110 0.021(4) 0.019(4) 0.015(3) 0.003(3) -0.008(3) -0.004(3)
C1S 0.053(7) 0.092(10) 0.055(7) 0.014(7) 0.022(6) -0.007(7)
Cl1S 0.179(10) 0.053(4) 0.080(5) -0.009(4) -0.027(6) 0.002(5)
Cl2S 0.113(7) 0.064(4) 0.077(5) 0.002(4) 0.029(5) 0.007(5)
Cl3S 0.165(10) 0.053(4) 0.083(5) -0.006(4) -0.036(6) -0.012(6)

_geom_special_details            
;
 All esds (except the esd in the dihedral angle between two l.s. planes)
 are estimated using the full covariance matrix.  The cell esds are taken
 into account individually in the estimation of esds in distances, angles
 and torsion angles; correlations between esds in cell parameters are only
 used when they are defined by crystal symmetry.  An approximate (isotropic)
 treatment of cell esds is used for estimating esds involving l.s. planes.
;
loop_
_geom_bond_atom_site_label_1
_geom_bond_atom_site_label_2
_geom_bond_distance
_geom_bond_site_symmetry_2
_geom_bond_publ_flag
Cl5S C2S 1.707(17) . ?
Cl6S C2S 1.801(17) . ?
Cl7S C3S 1.74(3) . ?
Cl8S C3S 1.70(2) . ?
N1 C11 1.531(9) . ?
N1 C12 1.527(9) . ?
N1 C13 1.535(8) . ?
N1 C14 1.533(9) . ?
C11 C22 1.520(10) . ?
C12 C62 1.519(10) . ?
C13 C92 1.480(10) . ?
C14 C102 1.491(10) . ?
C21 C22 1.386(10) . ?
C21 C30 1.443(10) . ?
C21 C61 1.500(10) . ?
C22 C23 1.438(10) . ?
C23 C24 1.391(10) . ?
C23 C31 1.476(10) . ?
C24 C25 1.431(11) . ?
C25 C26 1.397(11) . ?
C25 C30 1.428(11) . ?
C26 C27 1.386(13) . ?
C27 C28 1.419(13) . ?
C28 C29 1.376(11) . ?
C29 C30 1.403(11) . ?
C31 C32 1.394(12) . ?
C31 C36 1.417(11) . ?
C32 C33 1.419(11) . ?
C33 C34 1.373(13) . ?
C34 C35 1.395(13) . ?
C34 C37 1.471(12) . ?
C35 C36 1.393(11) . ?
C37 C38 1.423(14) . ?
C37 C42 1.358(13) . ?
C38 C39 1.370(15) . ?
C39 C40 1.466(13) . ?
C40 C41 1.335(14) . ?
C40 C43 1.483(12) . ?
C41 C42 1.403(14) . ?
C43 C44 1.376(12) . ?
C43 C48 1.429(13) . ?
C44 C45 1.375(12) . ?
C45 C46 1.402(14) . ?
C46 C47 1.386(13) . ?
C47 C48 1.390(13) . ?
C61 C62 1.388(10) . ?
C61 C70 1.434(10) . ?
C62 C63 1.409(10) . ?
C63 C64 1.399(11) . ?
C63 C71 1.492(9) . ?
C64 C65 1.392(11) . ?
C65 C66 1.444(12) . ?
C65 C70 1.427(11) . ?
C66 C67 1.390(13) . ?
C67 C68 1.378(13) . ?
C68 C69 1.369(12) . ?
C69 C70 1.417(11) . ?
C71 C72 1.417(10) . ?
C71 C76 1.401(10) . ?
C72 C73 1.385(10) . ?
C73 C74 1.404(10) . ?
C74 C75 1.402(10) . ?
C74 C77 1.482(10) . ?
C75 C76 1.369(11) . ?
C77 C78 1.403(11) . ?
C77 C82 1.400(10) . ?
C78 C79 1.376(11) . ?
C79 C80 1.401(12) . ?
C80 C81 1.381(12) . ?
C80 C83 1.494(12) . ?
C81 C82 1.381(10) . ?
C83 C84 1.386(19) . ?
C83 C88 1.424(19) . ?
C84 C85 1.421(13) . ?
C85 C86 1.341(18) . ?
C86 C87 1.358(18) . ?
C87 C88 1.413(13) . ?
C91 C92 1.399(10) . ?
C91 C100 1.427(11) . ?
C91 C101 1.462(11) . ?
C92 C93 1.423(11) . ?
C93 C94 1.345(12) . ?
C94 C95 1.420(13) . ?
C95 C96 1.439(13) . ?
C95 C100 1.436(13) . ?
C96 C97 1.352(16) . ?
C97 C98 1.383(16) . ?
C98 C99 1.381(13) . ?
C99 C100 1.386(12) . ?
C101 C102 1.402(11) . ?
C101 C110 1.437(10) . ?
C102 C103 1.427(10) . ?
C103 C104 1.370(11) . ?
C104 C105 1.437(11) . ?
C105 C106 1.415(11) . ?
C105 C110 1.418(10) . ?
C106 C107 1.370(13) . ?
C107 C108 1.397(12) . ?
C108 C109 1.407(11) . ?
C109 C110 1.416(11) . ?
C1S Cl1S 1.798(16) . ?
C1S Cl2S 1.953(17) . ?

loop_
_geom_angle_atom_site_label_1
_geom_angle_atom_site_label_2
_geom_angle_atom_site_label_3
_geom_angle
_geom_angle_site_symmetry_1
_geom_angle_site_symmetry_3
_geom_angle_publ_flag
Cl5S C2S Cl6S 112.0(7) . . ?
Cl8S C3S Cl7S 115.6(13) . . ?
C11 N1 C13 110.9(5) . . ?
C11 N1 C14 105.5(5) . . ?
C12 N1 C11 114.0(5) . . ?
C12 N1 C13 105.8(5) . . ?
C12 N1 C14 110.3(5) . . ?
C14 N1 C13 110.4(5) . . ?
C22 C11 N1 113.0(6) . . ?
C62 C12 N1 114.3(5) . . ?
C92 C13 N1 114.3(5) . . ?
C102 C14 N1 114.3(6) . . ?
C22 C21 C30 121.1(6) . . ?
C22 C21 C61 120.6(6) . . ?
C30 C21 C61 118.2(6) . . ?
C21 C22 C11 117.5(6) . . ?
C21 C22 C23 120.6(6) . . ?
C23 C22 C11 121.8(6) . . ?
C22 C23 C31 124.1(6) . . ?
C24 C23 C22 118.2(6) . . ?
C24 C23 C31 117.6(7) . . ?
C23 C24 C25 121.9(7) . . ?
C26 C25 C24 120.6(7) . . ?
C26 C25 C30 119.8(7) . . ?
C30 C25 C24 119.6(7) . . ?
C27 C26 C25 120.8(8) . . ?
C26 C27 C28 119.1(8) . . ?
C29 C28 C27 120.9(8) . . ?
C28 C29 C30 120.6(7) . . ?
C25 C30 C21 117.7(7) . . ?
C29 C30 C21 123.5(7) . . ?
C29 C30 C25 118.8(7) . . ?
C32 C31 C23 122.7(7) . . ?
C32 C31 C36 118.0(7) . . ?
C36 C31 C23 119.2(7) . . ?
C31 C32 C33 120.7(8) . . ?
C34 C33 C32 120.8(8) . . ?
C33 C34 C35 118.7(8) . . ?
C33 C34 C37 120.7(8) . . ?
C35 C34 C37 120.6(8) . . ?
C36 C35 C34 121.6(8) . . ?
C35 C36 C31 120.0(8) . . ?
C38 C37 C34 119.6(8) . . ?
C42 C37 C34 122.6(9) . . ?
C42 C37 C38 117.7(9) . . ?
C39 C38 C37 122.0(9) . . ?
C38 C39 C40 118.6(9) . . ?
C39 C40 C43 118.4(8) . . ?
C41 C40 C39 117.6(8) . . ?
C41 C40 C43 124.0(8) . . ?
C40 C41 C42 123.1(9) . . ?
C37 C42 C41 120.9(9) . . ?
C44 C43 C40 120.7(8) . . ?
C44 C43 C48 118.9(8) . . ?
C48 C43 C40 120.3(8) . . ?
C45 C44 C43 121.0(9) . . ?
C44 C45 C46 120.1(9) . . ?
C47 C46 C45 120.5(8) . . ?
C46 C47 C48 119.3(8) . . ?
C47 C48 C43 120.2(8) . . ?
C62 C61 C21 119.6(6) . . ?
C62 C61 C70 121.8(7) . . ?
C70 C61 C21 118.6(6) . . ?
C61 C62 C12 117.8(6) . . ?
C61 C62 C63 120.1(7) . . ?
C63 C62 C12 122.0(6) . . ?
C62 C63 C71 124.1(6) . . ?
C64 C63 C62 119.1(7) . . ?
C64 C63 C71 116.5(6) . . ?
C65 C64 C63 121.0(7) . . ?
C64 C65 C66 120.4(7) . . ?
C64 C65 C70 121.2(7) . . ?
C70 C65 C66 118.3(7) . . ?
C67 C66 C65 119.3(8) . . ?
C68 C67 C66 121.0(9) . . ?
C69 C68 C67 121.6(8) . . ?
C68 C69 C70 120.0(8) . . ?
C65 C70 C61 116.4(7) . . ?
C69 C70 C61 124.0(7) . . ?
C69 C70 C65 119.6(7) . . ?
C72 C71 C63 120.2(6) . . ?
C76 C71 C63 120.8(6) . . ?
C76 C71 C72 118.5(6) . . ?
C73 C72 C71 119.7(6) . . ?
C72 C73 C74 121.4(6) . . ?
C73 C74 C77 121.1(6) . . ?
C75 C74 C73 118.1(7) . . ?
C75 C74 C77 120.7(6) . . ?
C76 C75 C74 121.1(7) . . ?
C75 C76 C71 121.2(6) . . ?
C78 C77 C74 120.9(7) . . ?
C82 C77 C74 121.5(6) . . ?
C82 C77 C78 117.5(7) . . ?
C79 C78 C77 121.2(7) . . ?
C78 C79 C80 120.8(7) . . ?
C79 C80 C83 120.5(9) . . ?
C81 C80 C79 118.0(7) . . ?
C81 C80 C83 121.5(9) . . ?
C82 C81 C80 121.6(7) . . ?
C81 C82 C77 120.8(7) . . ?
C84 C83 C80 121.3(11) . . ?
C84 C83 C88 119.0(9) . . ?
C88 C83 C80 119.8(11) . . ?
C83 C84 C85 119.7(13) . . ?
C86 C85 C84 120.9(13) . . ?
C85 C86 C87 120.6(10) . . ?
C86 C87 C88 121.4(13) . . ?
C87 C88 C83 118.3(12) . . ?
C92 C91 C100 120.7(7) . . ?
C92 C91 C101 117.8(7) . . ?
C100 C91 C101 121.5(7) . . ?
C91 C92 C13 120.7(7) . . ?
C91 C92 C93 118.6(7) . . ?
C93 C92 C13 120.5(7) . . ?
C94 C93 C92 122.3(8) . . ?
C93 C94 C95 120.2(8) . . ?
C94 C95 C96 121.5(9) . . ?
C94 C95 C100 119.8(8) . . ?
C100 C95 C96 118.6(9) . . ?
C97 C96 C95 120.1(10) . . ?
C96 C97 C98 121.0(10) . . ?
C99 C98 C97 120.2(9) . . ?
C98 C99 C100 121.9(8) . . ?
C91 C100 C95 118.1(8) . . ?
C99 C100 C91 124.0(8) . . ?
C99 C100 C95 117.8(8) . . ?
C102 C101 C91 120.2(7) . . ?
C102 C101 C110 118.4(7) . . ?
C110 C101 C91 121.5(7) . . ?
C101 C102 C14 120.4(7) . . ?
C101 C102 C103 120.5(7) . . ?
C103 C102 C14 119.0(7) . . ?
C104 C103 C102 121.4(7) . . ?
C103 C104 C105 119.2(7) . . ?
C106 C105 C104 119.5(7) . . ?
C106 C105 C110 120.6(7) . . ?
C110 C105 C104 119.9(7) . . ?
C107 C106 C105 119.4(8) . . ?
C106 C107 C108 121.5(8) . . ?
C107 C108 C109 119.7(8) . . ?
C108 C109 C110 120.2(7) . . ?
C105 C110 C101 119.9(7) . . ?
C109 C110 C101 121.7(7) . . ?
C109 C110 C105 118.3(7) . . ?
Cl1S C1S Cl2S 105.3(8) . . ?


_shelx_fab_file                  
;
-11 -2 -2 -0.9948 -0.8894
-11 -2 -1 -1.7815 -1.8060
-11 -1 -3 -2.3053 1.3549
-11 -1 -2 0.8355 1.5490
-11 -1 -1 0.4145 1.9574
-10 -13 -3 4.6528 3.5230
-10 -13 -2 -0.9026 0.6746
-10 -13 -1 3.2518 -3.4212
-10 -12 -6 -1.2150 1.8510
-10 -12 -5 1.2749 -4.0846
-10 -12 -4 1.5482 0.1118
-10 -12 -3 -2.6795 -0.5197
-10 -12 -2 1.1371 -1.2440
-10 -12 -1 -4.4043 3.9081
-10 -11 -8 0.3951 -1.0257
-10 -11 -7 -2.0548 1.8706
-10 -11 -6 -0.6030 -0.1435
-10 -11 -5 -0.6037 0.6825
-10 -11 -4 -3.1261 -1.7577
-10 -11 -3 4.7557 1.3351
-10 -11 -2 -0.0154 2.5142
-10 -11 -1 2.4693 -2.6240
-10 -10 -10 -1.7256 0.2151
-10 -10 -9 2.6233 0.0328
-10 -10 -8 0.3536 1.2344
-10 -10 -7 0.9551 -0.1983
-10 -10 -6 -0.8126 1.8150
-10 -10 -5 -1.7979 -1.4633
-10 -10 -4 2.5154 -1.9895
-10 -10 -3 -1.6780 2.3353
-10 -10 -2 1.0926 -4.4647
-10 -10 -1 -0.9888 0.8419
-10 -9 -11 0.3634 -0.6506
-10 -9 -10 0.2954 -2.3213
-10 -9 -9 3.3643 0.1103
-10 -9 -8 0.7314 -1.4665
-10 -9 -7 -0.4547 0.8022
-10 -9 -6 -2.1601 0.8882
-10 -9 -5 1.4553 1.2601
-10 -9 -4 -3.3981 -0.2729
-10 -9 -3 0.1327 -1.2287
-10 -9 -2 1.4959 1.0583
-10 -9 -1 -1.9966 -1.3644
-10 -8 -12 -1.1663 -0.5628
-10 -8 -11 0.0282 -3.3297
-10 -8 -10 -1.9700 0.1703
-10 -8 -9 1.5366 -0.6741
-10 -8 -8 1.3366 1.9010
-10 -8 -7 0.4079 1.4541
-10 -8 -6 0.6254 -1.4084
-10 -8 -5 -3.3277 1.9048
-10 -8 -4 0.0837 -2.9053
-10 -8 -3 -0.6206 2.1410
-10 -8 -2 -0.7007 -1.9514
-10 -8 -1 1.6363 -2.7049
-10 -7 -13 -0.9000 -1.0072
-10 -7 -12 -2.0961 0.0766
-10 -7 -11 -1.6948 1.4192
-10 -7 -10 0.0995 -0.8324
-10 -7 -9 2.9791 -0.2866
-10 -7 -8 -0.2607 0.2981
-10 -7 -7 2.0259 -0.2249
-10 -7 -6 -1.2828 0.5563
-10 -7 -5 -0.1445 1.3070
-10 -7 -4 0.1366 1.4914
-10 -7 -3 -4.0633 -0.8233
-10 -7 -2 0.8930 -0.2870
-10 -7 -1 -4.0538 -1.1042
-10 -6 -13 -0.7640 1.5267
-10 -6 -12 -0.2559 -0.3609
-10 -6 -11 -0.6138 -3.4792
-10 -6 -10 -0.9527 0.5005
-10 -6 -9 0.9802 -0.9115
-10 -6 -8 1.4378 -0.7502
-10 -6 -7 0.7384 4.1053
-10 -6 -6 1.6623 -2.6052
-10 -6 -5 -1.9364 2.1705
-10 -6 -4 -2.4180 0.9830
-10 -6 -3 -0.1989 0.0519
-10 -6 -2 -1.8292 0.4433
-10 -6 -1 1.1114 -3.6108
-10 -5 -14 -1.0506 -1.6113
-10 -5 -13 -0.3908 1.6235
-10 -5 -12 0.6931 -1.6046
-10 -5 -11 -1.5733 -0.8448
-10 -5 -10 -1.1312 1.6167
-10 -5 -9 2.0292 -1.3928
-10 -5 -8 -1.1345 0.5414
-10 -5 -7 1.0277 0.7339
-10 -5 -6 2.0063 0.1187
-10 -5 -5 -0.3204 1.0204
-10 -5 -4 3.0204 1.5965
-10 -5 -3 -4.0238 -0.3349
-10 -5 -2 -1.3555 -0.1561
-10 -5 -1 -4.4297 -0.1207
-10 -4 -14 0.3508 -0.0921
-10 -4 -13 -0.6783 0.0955
-10 -4 -12 1.6799 1.1840
-10 -4 -11 -0.3869 -2.7861
-10 -4 -10 -1.3840 -1.5865
-10 -4 -9 0.1723 1.2502
-10 -4 -8 0.6552 -2.1942
-10 -4 -7 1.6053 1.8914
-10 -4 -6 2.1993 -0.4107
-10 -4 -5 0.7037 -0.4804
-10 -4 -4 -2.8661 2.8699
-10 -4 -3 -0.7272 1.2889
-10 -4 -2 -1.3247 2.7595
-10 -4 -1 -0.0248 -2.5220
-10 -3 -15 -0.3827 3.0116
-10 -3 -14 -0.3721 -3.0974
-10 -3 -13 -1.6725 1.1211
-10 -3 -12 0.0944 0.1769
-10 -3 -11 0.2413 -2.3298
-10 -3 -10 -0.2662 2.2220
-10 -3 -9 0.2915 -1.1523
-10 -3 -8 0.2893 -1.3888
-10 -3 -7 -0.5895 0.5693
-10 -3 -6 0.2810 -0.1733
-10 -3 -5 0.2813 1.2917
-10 -3 -4 4.9880 1.5785
-10 -3 -3 -0.5042 -0.6739
-10 -3 -2 -0.7109 -1.0617
-10 -3 -1 -1.2220 1.0617
-10 -2 -15 -0.3633 1.3151
-10 -2 -14 -0.4481 2.0879
-10 -2 -13 -0.5856 -0.8153
-10 -2 -12 1.7055 1.1745
-10 -2 -11 0.7126 1.2633
-10 -2 -10 -0.3480 -4.2557
-10 -2 -9 -1.2904 -0.6771
-10 -2 -8 -1.9131 0.7034
-10 -2 -7 1.7457 -1.4043
-10 -2 -6 1.7936 1.3015
-10 -2 -5 2.0487 -0.1469
-10 -2 -4 -0.5188 -0.4684
-10 -2 -3 -1.3464 -0.2174
-10 -2 -2 -0.6131 4.4464
-10 -2 -1 -0.3090 1.3536
-10 -1 -15 -1.9338 2.0075
-10 -1 -14 0.1113 -1.3210
-10 -1 -13 -0.3412 -0.1253
-10 -1 -12 -1.0494 0.7781
-10 -1 -11 -1.2514 -0.9225
-10 -1 -10 0.7843 2.0007
-10 -1 -9 -0.7822 -0.2429
-10 -1 -8 0.9396 -2.0414
-10 -1 -7 2.0925 -0.1801
-10 -1 -6 -1.5272 -1.5560
-10 -1 -5 -2.8609 0.7602
-10 -1 -4 2.8407 2.0074
-10 -1 -3 2.5489 -0.3425
-10 -1 -2 0.4984 -2.3821
-10 -1 -1 6.0524 0.6882
-9 -18 -3 0.1713 2.4590
-9 -18 -2 1.3254 2.0364
-9 -18 -1 -0.7911 1.6521
-9 -17 -7 -0.9163 -0.3646
-9 -17 -6 -0.7773 0.1138
-9 -17 -5 2.3298 0.5521
-9 -17 -4 2.6336 1.2366
-9 -17 -3 0.5655 1.0632
-9 -17 -2 2.1850 -0.8136
-9 -17 -1 -1.9135 1.9081
-9 -16 -10 1.4774 1.4965
-9 -16 -9 1.1382 0.5089
-9 -16 -8 -2.0029 -0.6449
-9 -16 -7 2.3821 0.1931
-9 -16 -6 1.2219 -2.9829
-9 -16 -5 0.3708 1.5000
-9 -16 -4 -0.6912 -1.6580
-9 -16 -3 -0.8039 -1.1769
-9 -16 -2 -0.5389 2.0294
-9 -16 -1 -0.4579 -0.7649
-9 -15 -11 3.3714 -2.7291
-9 -15 -10 -1.0496 1.9822
-9 -15 -9 -1.1302 0.7445
-9 -15 -8 -1.3255 -0.8359
-9 -15 -7 -1.7275 0.1243
-9 -15 -6 0.0262 -1.2962
-9 -15 -5 -0.1856 -1.6302
-9 -15 -4 2.4269 1.3185
-9 -15 -3 -0.0284 2.5162
-9 -15 -2 1.7104 -0.7034
-9 -15 -1 0.4918 2.7043
-9 -14 -13 -2.7162 -1.3925
-9 -14 -12 -1.3485 1.9086
-9 -14 -11 0.0493 -0.0619
-9 -14 -10 -0.2463 1.3946
-9 -14 -9 2.5809 2.3015
-9 -14 -8 -1.7460 -2.4765
-9 -14 -7 -0.7093 1.3929
-9 -14 -6 1.2009 -2.5623
-9 -14 -5 1.2586 -0.7487
-9 -14 -4 0.1914 2.4100
-9 -14 -3 0.5842 -2.6851
-9 -14 -2 0.5560 1.3920
-9 -14 -1 -1.3756 -1.3619
-9 -13 -14 -1.1001 2.3392
-9 -13 -13 2.5260 0.1046
-9 -13 -12 -1.6238 -0.5012
-9 -13 -11 2.3603 -1.9538
-9 -13 -10 1.4288 -0.5674
-9 -13 -9 -0.8905 2.0691
-9 -13 -8 -0.1085 0.0051
-9 -13 -7 -2.7766 -0.0208
-9 -13 -6 0.6097 -0.4044
-9 -13 -5 -1.4200 -2.5048
-9 -13 -4 1.1098 -2.5713
-9 -13 -3 0.2591 2.4436
-9 -13 -2 -0.3091 -0.7130
-9 -13 -1 2.3602 1.7162
-9 -12 -15 0.9647 0.4953
-9 -12 -14 0.6067 -0.4812
-9 -12 -13 0.5914 -2.9018
-9 -12 -12 -2.3014 -0.7851
-9 -12 -11 -0.0604 -0.0026
-9 -12 -10 -0.8914 -0.3200
-9 -12 -9 0.9314 4.5567
-9 -12 -8 -0.4944 -0.9442
-9 -12 -7 -1.3671 0.3363
-9 -12 -6 -0.9108 0.3120
-9 -12 -5 0.2975 -4.2188
-9 -12 -4 0.5844 3.2358
-9 -12 -3 -0.3311 -1.9295
-9 -12 -2 3.2351 -0.0516
-9 -12 -1 0.2061 -0.0407
-9 -11 -16 0.1645 2.1293
-9 -11 -15 1.2370 -0.5498
-9 -11 -14 -3.1835 1.0062
-9 -11 -13 0.9409 0.4297
-9 -11 -12 -0.3585 -1.0163
-9 -11 -11 -0.2441 0.3001
-9 -11 -10 3.0506 -0.6831
-9 -11 -9 -0.4620 1.5855
-9 -11 -8 1.5201 1.7049
-9 -11 -7 -1.7337 0.6517
-9 -11 -6 -0.1988 -0.6339
-9 -11 -5 -1.3884 -0.1039
-9 -11 -4 -1.5769 -4.1000
-9 -11 -3 0.5021 -1.1284
-9 -11 -2 -2.4564 -0.2340
-9 -11 -1 2.6884 -2.1471
-9 -10 -17 -0.0896 0.2397
-9 -10 -16 0.0612 0.3869
-9 -10 -15 -0.0664 2.4331
-9 -10 -14 -0.2636 0.9914
-9 -10 -13 2.0658 -1.7293
-9 -10 -12 -0.4323 -2.5775
-9 -10 -11 0.6808 -0.5547
-9 -10 -10 0.5523 -2.2972
-9 -10 -9 0.1949 2.4797
-9 -10 -8 -1.1553 2.4274
-9 -10 -7 -1.4786 -1.0843
-9 -10 -6 -0.7204 3.9212
-9 -10 -5 -2.3527 -3.2866
-9 -10 -4 0.6496 0.6272
-9 -10 -3 -1.1102 -0.2805
-9 -10 -2 1.8362 -2.2865
-9 -10 -1 2.4660 0.9061
-9 -9 -18 -0.2379 -0.5728
-9 -9 -17 1.2906 -1.2735
-9 -9 -16 -2.6995 -0.0731
-9 -9 -15 1.1888 1.1507
-9 -9 -14 -1.5158 0.7724
-9 -9 -13 -1.8473 0.4936
-9 -9 -12 1.9247 -1.7874
-9 -9 -11 -1.5081 -0.6079
-9 -9 -10 1.3656 -0.1846
-9 -9 -9 -0.3211 1.5659
-9 -9 -8 1.1669 1.8429
-9 -9 -7 1.3010 2.8449
-9 -9 -6 -0.0334 -0.3194
-9 -9 -5 0.4981 0.1220
-9 -9 -4 -3.5770 -0.6322
-9 -9 -3 -0.5808 -3.7542
-9 -9 -2 -3.8079 -0.5265
-9 -9 -1 0.9036 -3.3261
-9 -8 -19 1.5025 -0.4002
-9 -8 -18 -1.3031 -1.9558
-9 -8 -17 0.0361 0.8704
-9 -8 -16 0.4199 0.1156
-9 -8 -15 -0.6337 2.1389
-9 -8 -14 -0.7153 1.5089
-9 -8 -13 0.6474 -0.1135
-9 -8 -12 -0.2272 -1.7731
-9 -8 -11 1.6447 -0.4878
-9 -8 -10 2.1127 -1.6573
-9 -8 -9 1.3608 -1.6557
-9 -8 -8 0.4418 3.0257
-9 -8 -7 -2.8504 -2.1076
-9 -8 -6 0.3093 3.8338
-9 -8 -5 -2.6119 1.9953
-9 -8 -4 -1.8393 -1.3175
-9 -8 -3 0.4717 1.7523
-9 -8 -2 -0.5653 -3.0172
-9 -8 -1 1.6362 -0.0926
-9 -7 -19 2.1316 0.3151
-9 -7 -18 -0.0621 -0.0830
-9 -7 -17 3.7423 -0.3730
-9 -7 -16 -1.6732 -3.1267
-9 -7 -15 -2.0697 0.3303
-9 -7 -14 0.2441 1.2449
-9 -7 -13 -2.9407 0.5749
-9 -7 -12 1.9472 -0.5288
-9 -7 -11 0.6958 -1.3871
-9 -7 -10 -0.6025 -1.9098
-9 -7 -9 -0.6673 1.1641
-9 -7 -8 -0.9689 0.8650
-9 -7 -7 2.2465 2.3066
-9 -7 -6 0.5155 2.5190
-9 -7 -5 3.2913 -1.0124
-9 -7 -4 -1.7996 2.1537
-9 -7 -3 -1.4359 -1.3960
-9 -7 -2 -2.8046 -1.7124
-9 -7 -1 -2.2658 -0.9599
-9 -6 -19 1.6113 1.0121
-9 -6 -18 -0.9486 -1.9984
-9 -6 -17 -0.5429 0.6726
-9 -6 -16 0.5375 0.9116
-9 -6 -15 -0.6802 0.6928
-9 -6 -14 -0.5517 1.1811
-9 -6 -13 -0.2516 0.9791
-9 -6 -12 -1.4920 -0.4835
-9 -6 -11 0.4736 0.1009
-9 -6 -10 2.8552 0.6353
-9 -6 -9 1.1202 -3.7003
-9 -6 -8 2.9342 1.1067
-9 -6 -7 -1.2873 -1.6062
-9 -6 -6 -0.7253 -0.6637
-9 -6 -5 0.4484 5.4060
-9 -6 -4 -3.3731 -1.1626
-9 -6 -3 0.7078 2.4804
-9 -6 -2 -0.4759 -0.4472
-9 -6 -1 -0.9412 -1.5341
-9 -5 -20 -2.5559 1.6844
-9 -5 -19 3.0435 1.6817
-9 -5 -18 0.3168 1.1723
-9 -5 -17 3.3596 2.3064
-9 -5 -16 2.6987 -3.0635
-9 -5 -15 -2.9632 -1.5244
-9 -5 -14 0.1650 0.7033
-9 -5 -13 -1.1454 -0.0748
-9 -5 -12 -0.4739 0.2811
-9 -5 -11 1.4506 -0.1889
-9 -5 -10 -0.4192 -2.0618
-9 -5 -9 -0.3884 -0.5447
-9 -5 -8 -2.2947 0.5988
-9 -5 -7 1.1234 -0.5097
-9 -5 -6 -0.3752 2.5194
-9 -5 -5 2.8766 -0.9820
-9 -5 -4 2.1441 1.3210
-9 -5 -3 -0.8598 2.9376
-9 -5 -2 1.1966 -0.9464
-9 -5 -1 -3.2179 2.4836
-9 -4 -20 0.0690 -2.7723
-9 -4 -19 1.5994 -0.2132
-9 -4 -18 -0.3497 -1.0577
-9 -4 -17 -0.5558 0.1087
-9 -4 -16 0.6459 0.4404
-9 -4 -15 -0.0477 -0.8557
-9 -4 -14 -0.3470 -0.3470
-9 -4 -13 -1.0092 1.5962
-9 -4 -12 -1.2823 1.2648
-9 -4 -11 -2.1167 0.4015
-9 -4 -10 1.7293 2.9589
-9 -4 -9 1.5072 -2.6424
-9 -4 -8 1.7207 -1.9861
-9 -4 -7 1.7993 0.8397
-9 -4 -6 -1.5616 -4.6239
-9 -4 -5 1.4663 3.3077
-9 -4 -4 -0.9035 0.1844
-9 -4 -3 0.8581 -0.0009
-9 -4 -2 0.9634 2.5539
-9 -4 -1 -2.9043 -1.3737
-9 -3 -20 -4.8438 -1.2434
-9 -3 -19 1.2666 1.4943
-9 -3 -18 -0.2280 0.3732
-9 -3 -17 -0.6014 3.5314
-9 -3 -16 4.6871 -0.2962
-9 -3 -15 -0.8038 -1.4410
-9 -3 -14 0.3213 0.4350
-9 -3 -13 2.0347 -0.5699
-9 -3 -12 -1.1274 0.1843
-9 -3 -11 -0.0401 -0.5249
-9 -3 -10 -0.6983 -0.5272
-9 -3 -9 0.3266 -1.1775
-9 -3 -8 -2.0257 0.1218
-9 -3 -7 -0.2240 -0.2905
-9 -3 -6 -0.6757 0.5503
-9 -3 -5 -1.1350 -1.9413
-9 -3 -4 3.4084 -2.1499
-9 -3 -3 -0.3118 4.0029
-9 -3 -2 4.2060 0.3838
-9 -3 -1 0.4320 5.5431
-9 -2 -21 1.0785 1.1758
-9 -2 -20 0.2195 -1.7095
-9 -2 -19 0.9727 -1.6305
-9 -2 -18 0.1573 -0.4078
-9 -2 -17 -0.4868 1.2705
-9 -2 -16 0.4967 -1.0400
-9 -2 -15 0.7041 -2.1138
-9 -2 -14 1.3394 -1.2996
-9 -2 -13 -1.6214 -0.8372
-9 -2 -12 -0.6166 2.7077
-9 -2 -11 -2.6487 0.6727
-9 -2 -10 -2.6314 2.7942
-9 -2 -9 2.6311 1.8772
-9 -2 -8 0.6248 -3.6678
-9 -2 -7 1.8581 2.2721
-9 -2 -6 -0.0358 -3.4695
-9 -2 -5 -0.2775 -1.9226
-9 -2 -4 0.0569 1.2669
-9 -2 -3 1.9267 -3.1729
-9 -2 -2 3.9961 1.7977
-9 -2 -1 -2.7383 -0.3017
-9 -1 -21 0.3065 -1.6590
-9 -1 -20 -2.6700 -3.7860
-9 -1 -19 -0.7326 0.6109
-9 -1 -18 -0.5256 -0.7621
-9 -1 -17 -4.8631 1.5985
-9 -1 -16 2.2965 1.7626
-9 -1 -15 0.4187 -0.2840
-9 -1 -14 0.5799 1.0543
-9 -1 -13 4.4156 -0.2834
-9 -1 -12 -0.4977 0.9980
-9 -1 -11 -0.0552 -0.8707
-9 -1 -10 -0.8317 -0.7531
-9 -1 -9 0.0270 -0.3933
-9 -1 -8 -0.4828 -1.3624
-9 -1 -7 -1.4833 0.6700
-9 -1 -6 0.0232 1.5391
-9 -1 -5 -3.9299 -1.5585
-9 -1 -4 1.0597 -5.8004
-9 -1 -3 -0.7605 1.4744
-9 -1 -2 2.2038 -0.4993
-9 -1 -1 4.5559 3.4661
-8 -21 -6 -1.7378 -0.1591
-8 -21 -5 1.3924 1.6184
-8 -21 -4 1.5261 1.1065
-8 -21 -3 0.1065 2.9738
-8 -21 -2 -0.3398 4.2539
-8 -21 -1 -0.7221 -4.1604
-8 -20 -9 0.1707 -2.0738
-8 -20 -8 1.6229 2.1223
-8 -20 -7 -0.6363 0.0032
-8 -20 -6 1.7798 -0.1932
-8 -20 -5 -0.0534 0.0595
-8 -20 -4 4.0587 -1.0678
-8 -20 -3 -0.5747 -1.1229
-8 -20 -2 -1.5641 -0.4576
-8 -20 -1 -0.8379 1.0503
-8 -19 -12 1.9743 -2.1870
-8 -19 -11 -1.2142 2.4876
-8 -19 -10 -0.6447 -1.6478
-8 -19 -9 -3.0628 -0.3329
-8 -19 -8 -0.2648 -1.3446
-8 -19 -7 2.0630 -2.1892
-8 -19 -6 -2.2085 -2.1106
-8 -19 -5 0.5769 -0.7197
-8 -19 -4 1.3151 3.4183
-8 -19 -3 -0.5454 1.8411
-8 -19 -2 -0.3033 6.3639
-8 -19 -1 -0.6405 -0.3916
-8 -18 -13 0.1555 -0.8905
-8 -18 -12 -2.8026 1.6013
-8 -18 -11 -2.3325 3.3399
-8 -18 -10 -0.6219 -0.1602
-8 -18 -9 -1.0439 -2.1064
-8 -18 -8 1.6751 1.2848
-8 -18 -7 -1.6174 -0.2390
-8 -18 -6 4.0813 0.3052
-8 -18 -5 1.1638 1.6640
-8 -18 -4 1.5403 -0.5572
-8 -18 -3 3.5983 -0.2775
-8 -18 -2 -2.0765 -2.1357
-8 -18 -1 0.4004 -0.3931
-8 -17 -15 -0.6669 0.6479
-8 -17 -14 -1.4405 0.1031
-8 -17 -13 1.0343 4.1373
-8 -17 -12 2.9422 -2.1902
-8 -17 -11 1.1569 1.2982
-8 -17 -10 0.7918 0.7750
-8 -17 -9 -1.8973 -1.2217
-8 -17 -8 -1.2215 -1.5902
-8 -17 -7 1.6213 -2.4894
-8 -17 -6 -1.6268 -1.7926
-8 -17 -5 0.3774 -4.4000
-8 -17 -4 0.7271 1.3711
-8 -17 -3 -1.0096 1.6380
-8 -17 -2 0.2920 5.4581
-8 -17 -1 -1.5967 2.6872
-8 -16 -16 -0.4060 2.1879
-8 -16 -15 3.4722 1.2324
-8 -16 -14 1.2692 -1.4770
-8 -16 -13 0.9675 -1.5854
-8 -16 -12 -0.0864 -1.3789
-8 -16 -11 -3.6271 1.5450
-8 -16 -10 -2.5187 0.2319
-8 -16 -9 -3.5945 -0.7633
-8 -16 -8 1.3766 0.9939
-8 -16 -7 -2.4382 -0.8383
-8 -16 -6 1.5718 0.4664
-8 -16 -5 4.3324 2.2416
-8 -16 -4 -0.8525 -0.9043
-8 -16 -3 4.2853 1.4154
-8 -16 -2 0.7551 -1.4400
-8 -16 -1 -0.5102 -2.0002
-8 -15 -18 0.5868 0.7455
-8 -15 -17 2.8912 -2.8044
-8 -15 -16 -1.9619 -0.1836
-8 -15 -15 0.9607 2.3986
-8 -15 -14 -0.8631 -2.4714
-8 -15 -13 -2.2944 4.4749
-8 -15 -12 0.3984 1.0310
-8 -15 -11 1.4428 -0.1047
-8 -15 -10 1.5753 3.1044
-8 -15 -9 -0.3434 -0.1574
-8 -15 -8 -0.2783 -0.4871
-8 -15 -7 1.0933 -2.2175
-8 -15 -6 -1.7957 -0.4268
-8 -15 -5 0.3520 -4.6684
-8 -15 -4 0.7503 -2.9346
-8 -15 -3 -1.8113 -0.3698
-8 -15 -2 1.4585 2.8176
-8 -15 -1 -1.5804 4.4212
-8 -14 -19 0.7259 0.2911
-8 -14 -18 -0.2529 -0.5205
-8 -14 -17 0.5373 -2.9186
-8 -14 -16 -1.2643 0.0147
-8 -14 -15 0.9525 1.7502
-8 -14 -14 2.3747 0.9419
-8 -14 -13 1.7993 0.7141
-8 -14 -12 3.3415 -1.5941
-8 -14 -11 -0.7063 -0.0466
-8 -14 -10 -1.0359 -0.6954
-8 -14 -9 -4.9773 -0.8365
-8 -14 -8 -1.1802 1.0515
-8 -14 -7 -1.5205 -0.7300
-8 -14 -6 -3.6302 -0.1734
-8 -14 -5 4.6118 2.8483
-8 -14 -4 -0.6107 -1.3887
-8 -14 -3 1.7973 1.0975
-8 -14 -2 3.4240 0.7246
-8 -14 -1 -0.0106 -2.6126
-8 -13 -20 1.7006 -0.6433
-8 -13 -19 -0.6144 -2.1888
-8 -13 -18 -2.6756 -0.0363
-8 -13 -17 1.4346 -1.4495
-8 -13 -16 -0.4853 -3.2492
-8 -13 -15 0.1438 2.2989
-8 -13 -14 1.4832 -2.4613
-8 -13 -13 -1.2354 0.0793
-8 -13 -12 -1.5970 2.8028
-8 -13 -11 0.4898 -1.1979
-8 -13 -10 0.8884 3.0947
-8 -13 -9 -0.2588 1.7214
-8 -13 -8 0.2244 1.9797
-8 -13 -7 1.5137 -0.2301
-8 -13 -6 -0.8940 0.5555
-8 -13 -5 -0.9661 -1.7646
-8 -13 -4 1.5127 -4.7674
-8 -13 -3 -2.2092 -2.1934
-8 -13 -2 0.9915 -2.3489
-8 -13 -1 0.0513 3.0800
-8 -12 -20 -2.1353 0.5085
-8 -12 -19 -0.3237 2.0904
-8 -12 -18 0.8362 0.8436
-8 -12 -17 -0.9085 -2.0806
-8 -12 -16 -0.5432 -1.5199
-8 -12 -15 -2.0611 -0.3355
-8 -12 -14 0.1546 0.7320
-8 -12 -13 1.2910 1.3520
-8 -12 -12 3.6949 -0.0497
-8 -12 -11 2.3133 0.7620
-8 -12 -10 3.2269 -0.7983
-8 -12 -9 -1.1030 -1.0797
-8 -12 -8 -3.7718 -0.0486
-8 -12 -7 0.1964 -0.1805
-8 -12 -6 -6.6095 -1.0412
-8 -12 -5 0.7469 2.1353
-8 -12 -4 0.6726 0.1724
-8 -12 -3 -1.6936 -0.5375
-8 -12 -2 3.6371 2.3469
-8 -12 -1 -0.3924 -1.6330
-8 -11 -21 -0.4328 2.3579
-8 -11 -20 -0.0630 1.6206
-8 -11 -19 1.5421 0.9530
-8 -11 -18 -0.7443 -0.5675
-8 -11 -17 -0.4562 1.6389
-8 -11 -16 0.8430 -2.9635
-8 -11 -15 -1.5446 -1.3534
-8 -11 -14 0.2744 -0.1493
-8 -11 -13 1.2456 -3.3512
-8 -11 -12 -1.7927 1.1873
-8 -11 -11 0.3048 -1.4921
-8 -11 -10 0.6963 0.8994
-8 -11 -9 -1.2869 1.6184
-8 -11 -8 0.1680 2.6321
-8 -11 -7 0.6001 2.8542
-8 -11 -6 1.0249 1.2763
-8 -11 -5 -1.6778 2.1417
-8 -11 -4 1.4095 -3.3081
-8 -11 -3 -0.5470 -0.5510
-8 -11 -2 -0.7757 -4.7594
-8 -11 -1 1.3794 -2.3152
-8 -10 -22 -0.3493 -2.3919
-8 -10 -21 0.5677 1.6017
-8 -10 -20 -1.4247 -0.7995
-8 -10 -19 -1.1542 1.4382
-8 -10 -18 2.9531 2.5527
-8 -10 -17 -1.7827 -0.8525
-8 -10 -16 -0.4384 -0.4056
-8 -10 -15 -2.1726 -0.9961
-8 -10 -14 -3.4194 -0.4001
-8 -10 -13 -0.9244 0.4546
-8 -10 -12 2.1363 0.0758
-8 -10 -11 2.2414 2.3773
-8 -10 -10 4.0775 -0.3400
-8 -10 -9 5.5763 -0.4840
-8 -10 -8 -2.8447 -0.2563
-8 -10 -7 1.2187 -0.8009
-8 -10 -6 -3.8034 -0.9396
-8 -10 -5 -4.0959 -0.0623
-8 -10 -4 1.4768 1.3639
-8 -10 -3 -4.1239 -1.2820
-8 -10 -2 2.0363 2.7703
-8 -10 -1 -1.6625 0.4446
-8 -9 -22 -0.0297 0.0208
-8 -9 -21 0.8736 -0.3644
-8 -9 -20 -0.3248 -0.6379
-8 -9 -19 -1.0317 3.3073
-8 -9 -18 1.3539 0.1842
-8 -9 -17 -0.2572 3.2673
-8 -9 -16 1.1558 2.1041
-8 -9 -15 0.4640 -3.4629
-8 -9 -14 -1.1225 0.0622
-8 -9 -13 1.6099 -3.4091
-8 -9 -12 -1.3679 -1.5142
-8 -9 -11 -0.6999 -1.5438
-8 -9 -10 1.4763 -0.6447
-8 -9 -9 -2.3389 0.9281
-8 -9 -8 0.3015 -0.5586
-8 -9 -7 -0.1321 3.4854
-8 -9 -6 0.8801 1.5024
-8 -9 -5 -0.4425 4.2221
-8 -9 -4 0.6357 0.1537
-8 -9 -3 1.2226 1.9533
-8 -9 -2 -1.3865 -0.0444
-8 -9 -1 1.6352 -6.3738
-8 -8 -23 2.8127 0.0594
-8 -8 -22 0.1908 -3.6811
-8 -8 -21 0.6657 0.8247
-8 -8 -20 0.7242 -1.0272
-8 -8 -19 -1.7501 -0.9757
-8 -8 -18 3.4075 3.5062
-8 -8 -17 0.7495 -0.4650
-8 -8 -16 -0.5530 -0.6202
-8 -8 -15 -0.6058 0.1196
-8 -8 -14 -3.9604 -1.0792
-8 -8 -13 -4.2574 0.0135
-8 -8 -12 -0.3245 -0.0773
-8 -8 -11 1.7481 2.6904
-8 -8 -10 -0.0951 0.6028
-8 -8 -9 7.4480 -0.4855
-8 -8 -8 1.7392 1.1623
-8 -8 -7 0.2410 -1.5094
-8 -8 -6 2.8650 -1.4020
-8 -8 -5 -4.6455 -1.0431
-8 -8 -4 0.8235 0.7437
-8 -8 -3 -3.4181 -1.8104
-8 -8 -2 -0.7370 2.7230
-8 -8 -1 -0.6977 2.4074
-8 -7 -23 1.5086 -1.4907
-8 -7 -22 -1.1755 -0.5262
-8 -7 -21 1.3925 -0.9932
-8 -7 -20 2.4088 -3.8045
-8 -7 -19 -2.9815 1.3041
-8 -7 -18 -0.1839 0.4871
-8 -7 -17 0.0359 1.8543
-8 -7 -16 -0.7756 6.0317
-8 -7 -15 2.4591 -0.3797
-8 -7 -14 1.0919 -0.3087
-8 -7 -13 1.5845 -1.9861
-8 -7 -12 0.0298 -2.8103
-8 -7 -11 -1.8240 -1.7103
-8 -7 -10 1.2794 -1.3795
-8 -7 -9 -2.5159 1.8566
-8 -7 -8 -1.1702 -3.4514
-8 -7 -7 0.2787 -0.1317
-8 -7 -6 -0.5787 0.6140
-8 -7 -5 0.6621 2.1571
-8 -7 -4 1.8012 3.2968
-8 -7 -3 1.7723 2.2584
-8 -7 -2 -1.1265 6.3583
-8 -7 -1 1.7350 -3.7910
-8 -6 -24 -1.9514 2.3366
-8 -6 -23 0.0380 0.5098
-8 -6 -22 0.5009 -2.6030
-8 -6 -21 -0.5550 0.0061
-8 -6 -20 1.6650 -0.8451
-8 -6 -19 -0.6020 -2.4182
-8 -6 -18 0.4699 2.2460
-8 -6 -17 2.3234 0.5679
-8 -6 -16 1.3265 -1.4986
-8 -6 -15 0.7342 0.1283
-8 -6 -14 -1.0728 -0.8423
-8 -6 -13 -4.2020 -0.5445
-8 -6 -12 -3.4411 0.0873
-8 -6 -11 1.3708 1.5834
-8 -6 -10 -3.4267 1.5387
-8 -6 -9 1.5454 0.0693
-8 -6 -8 5.2267 2.3063
-8 -6 -7 -1.5780 -0.1996
-8 -6 -6 6.2058 -2.7934
-8 -6 -5 0.8656 -1.8602
-8 -6 -4 -0.3940 0.1224
-8 -6 -3 0.2994 -3.0381
-8 -6 -2 -2.8544 2.1036
-8 -6 -1 0.8143 4.1562
-8 -5 -24 -2.8981 3.0534
-8 -5 -23 2.0708 0.6415
-8 -5 -22 -2.1794 -0.5923
-8 -5 -21 -0.0660 -0.1871
-8 -5 -20 3.9913 -3.6838
-8 -5 -19 -1.8248 -1.4913
-8 -5 -18 -1.2871 -0.4594
-8 -5 -17 -0.6190 -1.4416
-8 -5 -16 -2.8102 4.8176
-8 -5 -15 1.3563 3.0740
-8 -5 -14 2.1397 0.5663
-8 -5 -13 2.0515 0.6398
-8 -5 -12 2.0995 -2.1764
-8 -5 -11 -0.8207 -1.3469
-8 -5 -10 1.1610 -1.3708
-8 -5 -9 -0.9368 2.2764
-8 -5 -8 -3.1586 -2.0682
-8 -5 -7 -0.8858 -3.8403
-8 -5 -6 -1.9555 -0.8810
-8 -5 -5 -0.5302 -2.8760
-8 -5 -4 3.6820 2.7085
-8 -5 -3 3.1489 1.0019
-8 -5 -2 -0.4792 6.8186
-8 -5 -1 2.7114 3.0287
-8 -4 -24 -0.4487 2.9544
-8 -4 -23 -3.0342 0.6315
-8 -4 -22 -0.3988 -0.8834
-8 -4 -21 -0.3919 1.5416
-8 -4 -20 0.6516 -0.3063
-8 -4 -19 1.1369 -1.4763
-8 -4 -18 -1.1930 -0.3730
-8 -4 -17 -0.3719 -0.3723
-8 -4 -16 1.9368 -0.2240
-8 -4 -15 2.2088 -0.6924
-8 -4 -14 1.0572 -0.3833
-8 -4 -13 0.1018 0.1405
-8 -4 -12 -2.7427 -0.8928
-8 -4 -11 -0.7786 -0.4271
-8 -4 -10 -2.4054 0.9170
-8 -4 -9 -5.2616 0.8021
-8 -4 -8 3.0809 2.8308
-8 -4 -7 -2.0790 2.2958
-8 -4 -6 2.3082 -1.8163
-8 -4 -5 6.4743 -2.8886
-8 -4 -4 -0.4413 -0.4232
-8 -4 -3 3.9177 -3.8731
-8 -4 -2 -1.1126 -0.2588
-8 -4 -1 0.2335 4.5478
-8 -3 -24 -4.1246 2.6885
-8 -3 -23 2.0859 1.7915
-8 -3 -22 -0.6399 0.0342
-8 -3 -21 -1.3186 1.0093
-8 -3 -20 3.0936 -1.0930
-8 -3 -19 -0.7853 -1.9178
-8 -3 -18 -0.5848 -0.1869
-8 -3 -17 -0.4076 -4.0162
-8 -3 -16 -3.3496 0.1416
-8 -3 -15 0.5522 3.2392
-8 -3 -14 -0.0093 -0.0676
-8 -3 -13 -0.1067 3.2924
-8 -3 -12 3.2040 0.5371
-8 -3 -11 0.3716 -0.8959
-8 -3 -10 1.8756 0.2651
-8 -3 -9 2.3632 0.7787
-8 -3 -8 -2.6698 0.7817
-8 -3 -7 -2.0433 -3.3732
-8 -3 -6 -2.7957 -0.5224
-8 -3 -5 -3.2511 -5.8004
-8 -3 -4 2.8036 -1.9849
-8 -3 -3 4.1141 -0.3810
-8 -3 -2 0.4535 0.6278
-8 -3 -1 4.0784 6.6754
-8 -2 -25 0.0926 -3.0381
-8 -2 -24 2.1285 0.8651
-8 -2 -23 -2.7625 0.0877
-8 -2 -22 -2.8701 -0.9436
-8 -2 -21 0.4659 2.6517
-8 -2 -20 0.1603 0.8656
-8 -2 -19 0.9050 1.0788
-8 -2 -18 0.1488 -0.6869
-8 -2 -17 -2.2864 -3.3653
-8 -2 -16 -1.4888 0.6477
-8 -2 -15 2.7548 0.1051
-8 -2 -14 1.1979 -0.8213
-8 -2 -13 2.4483 2.4835
-8 -2 -12 3.0358 -1.0198
-8 -2 -11 -2.4302 -2.7342
-8 -2 -10 -0.2667 0.1138
-8 -2 -9 -5.4380 -0.4653
-8 -2 -8 -2.4003 1.6827
-8 -2 -7 -0.9129 3.3652
-8 -2 -6 -4.2792 0.2710
-8 -2 -5 5.7259 -1.4176
-8 -2 -4 0.1903 -0.2304
-8 -2 -3 3.6063 -2.9171
-8 -2 -2 3.4890 -1.9637
-8 -2 -1 -0.3900 2.3700
-8 -1 -25 1.6950 -0.7943
-8 -1 -24 -2.5096 1.5287
-8 -1 -23 -0.4533 0.7557
-8 -1 -22 0.5249 -0.2209
-8 -1 -21 -1.0109 1.0017
-8 -1 -20 1.3697 1.6256
-8 -1 -19 -0.1662 -0.7249
-8 -1 -18 -0.1888 1.6783
-8 -1 -17 0.9783 -2.5587
-8 -1 -16 -1.8329 -4.3352
-8 -1 -15 0.8349 1.2417
-8 -1 -14 -0.4761 -2.3882
-8 -1 -13 -4.0782 2.3649
-8 -1 -12 1.8317 3.9546
-8 -1 -11 0.5619 -0.4401
-8 -1 -10 0.7955 2.3388
-8 -1 -9 5.1059 -0.4388
-8 -1 -8 -0.9391 1.4202
-8 -1 -7 -1.4593 -0.8558
-8 -1 -6 -1.1259 1.4547
-8 -1 -5 -4.9220 -2.6753
-8 -1 -4 0.7488 -6.1208
-8 -1 -3 3.3503 -0.6697
-8 -1 -2 0.2794 -5.9119
-8 -1 -1 4.4052 3.0925
-7 -24 -4 -0.4383 2.1159
-7 -24 -3 0.8663 -1.3865
-7 -24 -2 -1.7681 1.5765
-7 -24 -1 -3.2635 -2.8441
-7 -23 -8 -0.7581 -0.2931
-7 -23 -7 -0.4245 -1.6504
-7 -23 -6 -0.6601 -0.3303
-7 -23 -5 -0.5331 3.9642
-7 -23 -4 0.4246 0.7809
-7 -23 -3 -0.5497 2.5756
-7 -23 -2 -3.5614 0.0035
-7 -23 -1 1.8439 0.1832
-7 -22 -11 -0.9363 1.1853
-7 -22 -10 -1.3920 1.4831
-7 -22 -9 -0.2080 0.7497
-7 -22 -8 -0.8311 3.1903
-7 -22 -7 3.9615 0.1567
-7 -22 -6 0.4737 -0.6432
-7 -22 -5 1.5354 -2.1080
-7 -22 -4 0.6687 2.3639
-7 -22 -3 -1.5452 -0.1692
-7 -22 -2 2.4653 -0.6711
-7 -22 -1 -1.9372 1.9012
-7 -21 -14 0.8453 -0.5716
-7 -21 -13 1.1360 -0.4248
-7 -21 -12 2.6067 2.9740
-7 -21 -11 -1.9331 1.1092
-7 -21 -10 2.5492 2.2051
-7 -21 -9 0.0299 -2.5439
-7 -21 -8 -1.8829 -4.3087
-7 -21 -7 0.9294 -1.3821
-7 -21 -6 1.2215 -3.5521
-7 -21 -5 0.2264 3.2572
-7 -21 -4 -1.9085 1.6689
-7 -21 -3 1.0975 1.5370
-7 -21 -2 -3.7067 1.0736
-7 -21 -1 -1.6624 -0.3361
-7 -20 -15 -0.2312 0.3873
-7 -20 -14 3.3947 1.5428
-7 -20 -13 0.1595 1.3770
-7 -20 -12 0.0510 -2.0060
-7 -20 -11 -0.3334 -2.0606
-7 -20 -10 -5.1744 -0.2817
-7 -20 -9 -0.3329 -2.5071
-7 -20 -8 -2.5632 2.3975
-7 -20 -7 1.5338 0.8738
-7 -20 -6 3.8330 2.0131
-7 -20 -5 0.2680 0.3636
-7 -20 -4 1.9002 0.6810
-7 -20 -3 -2.8158 2.5190
-7 -20 -2 2.7079 -2.7512
-7 -20 -1 1.4460 1.8967
-7 -19 -17 1.0172 1.2444
-7 -19 -16 0.9682 -2.2357
-7 -19 -15 -2.7365 -0.0861
-7 -19 -14 0.9668 -0.0469
-7 -19 -13 -1.2556 -2.6163
-7 -19 -12 0.2077 4.4770
-7 -19 -11 -1.5944 1.4911
-7 -19 -10 0.9889 2.0578
-7 -19 -9 1.5343 3.4295
-7 -19 -8 -1.3362 -5.8991
-7 -19 -7 1.5972 -2.0042
-7 -19 -6 1.6800 -2.7332
-7 -19 -5 3.3646 -1.1228
-7 -19 -4 -1.3613 0.7524
-7 -19 -3 0.0752 0.4655
-7 -19 -2 -1.3393 1.5088
-7 -19 -1 -3.5351 -2.0256
-7 -18 -18 -1.3893 -3.3582
-7 -18 -17 -1.1741 1.7363
-7 -18 -16 0.3846 -1.3652
-7 -18 -15 -1.0451 -0.9068
-7 -18 -14 3.4911 3.4457
-7 -18 -13 1.7756 2.5467
-7 -18 -12 0.3839 0.8703
-7 -18 -11 3.3488 -1.4647
-7 -18 -10 -6.0755 -0.9352
-7 -18 -9 -2.3833 -5.5743
-7 -18 -8 -0.4790 -0.3070
-7 -18 -7 -3.6371 -0.6445
-7 -18 -6 2.8836 -0.3677
-7 -18 -5 0.8465 4.1460
-7 -18 -4 2.0756 0.6099
-7 -18 -3 -2.7012 3.3638
-7 -18 -2 0.5180 -0.4628
-7 -18 -1 3.7879 -1.3583
-7 -17 -20 -2.5523 2.3408
-7 -17 -19 2.2099 -1.1961
-7 -17 -18 1.3752 -1.8588
-7 -17 -17 0.0966 0.9294
-7 -17 -16 3.9773 -1.7206
-7 -17 -15 -2.5548 -0.7347
-7 -17 -14 0.7503 1.6126
-7 -17 -13 -0.2187 -3.7272
-7 -17 -12 -2.0847 2.3243
-7 -17 -11 -1.2854 3.0127
-7 -17 -10 -0.8866 -0.9379
-7 -17 -9 0.8839 6.5585
-7 -17 -8 -1.9571 -0.8526
-7 -17 -7 1.0206 -2.7949
-7 -17 -6 0.6447 -0.3818
-7 -17 -5 3.7077 -2.2189
-7 -17 -4 2.3983 -1.8555
-7 -17 -3 0.4675 -1.8024
-7 -17 -2 0.2338 2.2385
-7 -17 -1 -3.5104 -3.8874
-7 -16 -21 -2.4073 0.4804
-7 -16 -20 0.4287 -2.8194
-7 -16 -19 -0.9193 0.6213
-7 -16 -18 -1.5127 -1.8457
-7 -16 -17 0.4553 0.3380
-7 -16 -16 0.3857 0.1150
-7 -16 -15 -0.9519 -2.2998
-7 -16 -14 1.4960 1.7596
-7 -16 -13 1.8879 1.7053
-7 -16 -12 0.2912 2.8858
-7 -16 -11 4.9192 0.7937
-7 -16 -10 -1.5291 1.8893
-7 -16 -9 -3.1320 -3.8413
-7 -16 -8 1.4577 -3.1033
-7 -16 -7 -4.4633 -0.4701
-7 -16 -6 -0.9467 -4.7702
-7 -16 -5 -0.8771 2.2590
-7 -16 -4 1.9548 2.1251
-7 -16 -3 -1.3807 1.9614
-7 -16 -2 -2.9338 2.5033
-7 -16 -1 4.4898 -0.5167
-7 -15 -22 -3.0083 1.4786
-7 -15 -21 -1.8157 -0.0703
-7 -15 -20 -2.4754 3.8410
-7 -15 -19 -0.3876 0.7227
-7 -15 -18 2.7380 -2.5324
-7 -15 -17 -0.0444 -1.2149
-7 -15 -16 4.1832 -1.1499
-7 -15 -15 -0.8760 -1.6705
-7 -15 -14 -0.7145 1.1625
-7 -15 -13 1.4548 -1.1953
-7 -15 -12 -2.0781 -1.2307
-7 -15 -11 0.2808 2.0604
-7 -15 -10 -0.8318 -1.8574
-7 -15 -9 0.4320 3.2221
-7 -15 -8 -1.8886 3.4075
-7 -15 -7 -1.0490 0.5351
-7 -15 -6 -0.8506 1.5393
-7 -15 -5 0.6945 -0.6506
-7 -15 -4 2.7903 -0.4654
-7 -15 -3 2.0508 -4.9523
-7 -15 -2 2.9829 1.0751
-7 -15 -1 -2.0142 -3.0462
-7 -14 -23 1.9443 3.4863
-7 -14 -22 3.7666 -0.4568
-7 -14 -21 -2.0971 0.3202
-7 -14 -20 -0.8265 -1.8990
-7 -14 -19 -1.4523 -1.6266
-7 -14 -18 -3.4279 0.0630
-7 -14 -17 0.9770 -0.2570
-7 -14 -16 -0.0894 0.7889
-7 -14 -15 -0.1564 -1.3516
-7 -14 -14 0.5339 -0.4663
-7 -14 -13 -0.3313 -1.4350
-7 -14 -12 -0.0642 1.5178
-7 -14 -11 2.8203 1.1967
-7 -14 -10 1.9642 3.4945
-7 -14 -9 -0.1199 1.8393
-7 -14 -8 3.0201 -3.4606
-7 -14 -7 -1.9090 0.7514
-7 -14 -6 -0.5521 -4.6271
-7 -14 -5 -3.0413 -2.5763
-7 -14 -4 -2.0009 2.0645
-7 -14 -3 0.8370 0.3322
-7 -14 -2 -5.9677 2.1092
-7 -14 -1 2.3820 1.5164
-7 -13 -23 -0.2888 -1.2960
-7 -13 -22 -0.7250 1.5705
-7 -13 -21 -1.8284 0.1055
-7 -13 -20 -1.5919 2.4173
-7 -13 -19 -2.4101 2.4202
-7 -13 -18 0.9652 0.8699
-7 -13 -17 -0.0401 -1.4416
-7 -13 -16 2.3594 -1.0941
-7 -13 -15 1.1667 -0.7228
-7 -13 -14 -2.1860 -1.4156
-7 -13 -13 1.5514 1.0894
-7 -13 -12 -1.2032 -1.5589
-7 -13 -11 0.7553 -1.0073
-7 -13 -10 0.7876 -1.3017
-7 -13 -9 0.6398 -1.3668
-7 -13 -8 -0.6213 1.1727
-7 -13 -7 -1.5700 2.0466
-7 -13 -6 -1.1639 4.8138
-7 -13 -5 -1.9191 1.0982
-7 -13 -4 0.5896 3.9981
-7 -13 -3 -0.1620 -2.4362
-7 -13 -2 3.3414 -2.7153
-7 -13 -1 1.7838 -0.4534
-7 -12 -24 0.9155 0.1611
-7 -12 -23 1.2611 3.6642
-7 -12 -22 5.2354 0.5297
-7 -12 -21 0.5043 -1.3062
-7 -12 -20 -0.4278 0.3058
-7 -12 -19 0.6654 -2.4851
-7 -12 -18 -4.3128 0.7650
-7 -12 -17 0.3098 1.3843
-7 -12 -16 -0.2723 0.8941
-7 -12 -15 -0.6826 0.3577
-7 -12 -14 1.1094 -0.7420
-7 -12 -13 -1.9435 -3.7773
-7 -12 -12 -0.9586 -1.6768
-7 -12 -11 -0.6873 0.0001
-7 -12 -10 1.1542 1.9066
-7 -12 -9 1.1533 6.1647
-7 -12 -8 3.9358 -0.8656
-7 -12 -7 1.8239 1.2721
-7 -12 -6 2.3057 -1.6361
-7 -12 -5 1.2908 -5.5976
-7 -12 -4 -5.7179 1.2705
-7 -12 -3 0.6552 -0.3791
-7 -12 -2 -5.9376 0.6516
-7 -12 -1 -2.3930 1.7695
-7 -11 -25 2.7439 -2.4771
-7 -11 -24 0.7523 -1.7319
-7 -11 -23 -0.7795 -1.4370
-7 -11 -22 0.1194 0.3912
-7 -11 -21 -0.3954 -0.0226
-7 -11 -20 0.9262 0.4198
-7 -11 -19 -1.2886 0.4769
-7 -11 -18 -0.7031 2.7405
-7 -11 -17 -0.0025 1.1414
-7 -11 -16 -0.6926 -1.0813
-7 -11 -15 1.1886 1.6560
-7 -11 -14 -2.2642 -2.0742
-7 -11 -13 0.6850 1.1236
-7 -11 -12 0.3919 0.4948
-7 -11 -11 0.3769 -2.5892
-7 -11 -10 1.7825 0.0166
-7 -11 -9 1.1110 -4.0663
-7 -11 -8 -0.1382 -2.5239
-7 -11 -7 -1.6630 -1.8198
-7 -11 -6 0.3441 3.7527
-7 -11 -5 -2.6297 3.2626
-7 -11 -4 0.0486 5.0763
-7 -11 -3 -1.3361 5.0471
-7 -11 -2 -2.6457 -2.8827
-7 -11 -1 3.3178 1.5989
-7 -10 -25 -3.0654 1.6585
-7 -10 -24 0.1340 0.6439
-7 -10 -23 -0.6892 2.7167
-7 -10 -22 2.9690 1.4881
-7 -10 -21 2.8205 -2.0153
-7 -10 -20 -0.1496 0.3591
-7 -10 -19 3.2916 -2.8584
-7 -10 -18 -2.3624 -0.9409
-7 -10 -17 -1.0963 3.2567
-7 -10 -16 0.5740 2.2869
-7 -10 -15 -1.1390 1.8226
-7 -10 -14 1.6399 1.1877
-7 -10 -13 -1.6918 -3.9018
-7 -10 -12 -0.5423 -5.0964
-7 -10 -11 -3.2326 -1.2708
-7 -10 -10 -2.2539 -1.5150
-7 -10 -9 0.0560 6.0679
-7 -10 -8 0.7144 3.5382
-7 -10 -7 4.5425 1.9152
-7 -10 -6 3.0540 2.0762
-7 -10 -5 6.4646 -6.3813
-7 -10 -4 -1.7439 -0.1992
-7 -10 -3 -0.1457 0.0668
-7 -10 -2 -2.3032 -0.8405
-7 -10 -1 -6.3440 3.3110
-7 -9 -26 1.1214 1.0964
-7 -9 -25 2.3930 -2.1576
-7 -9 -24 -1.0112 -1.6472
-7 -9 -23 -0.4920 -1.0801
-7 -9 -22 -0.1914 -0.7369
-7 -9 -21 -1.1932 -0.6850
-7 -9 -20 2.5918 0.1705
-7 -9 -19 1.1540 -1.2720
-7 -9 -18 -0.6209 0.4059
-7 -9 -17 1.5025 2.7503
-7 -9 -16 -1.7867 -1.2206
-7 -9 -15 -0.9503 2.6695
-7 -9 -14 -2.3242 -0.4212
-7 -9 -13 -0.4989 0.3297
-7 -9 -12 1.2721 3.8442
-7 -9 -11 0.5865 -2.3425
-7 -9 -10 2.6128 1.9318
-7 -9 -9 1.5509 -3.6423
-7 -9 -8 0.3089 -5.1528
-7 -9 -7 -2.1253 -3.8395
-7 -9 -6 1.3132 -2.6732
-7 -9 -5 -1.5817 2.9958
-7 -9 -4 -0.6549 2.1331
-7 -9 -3 2.4773 7.6524
-7 -9 -2 -7.1904 1.3892
-7 -9 -1 -1.1051 3.5715
-7 -8 -26 0.0357 -1.7402
-7 -8 -25 -3.2686 -0.8833
-7 -8 -24 -1.8223 -0.1097
-7 -8 -23 -1.2600 1.4168
-7 -8 -22 -1.1895 1.1912
-7 -8 -21 2.3855 -0.2628
-7 -8 -20 -0.1488 0.7244
-7 -8 -19 3.5661 -2.5531
-7 -8 -18 1.1565 -3.6198
-7 -8 -17 -1.7262 1.1930
-7 -8 -16 0.7730 2.8855
-7 -8 -15 -0.8798 2.5385
-7 -8 -14 2.5528 3.6393
-7 -8 -13 -0.6349 -0.1728
-7 -8 -12 0.8593 -6.6148
-7 -8 -11 -1.4645 -2.3645
-7 -8 -10 -6.7502 -3.7825
-7 -8 -9 -1.4455 0.2899
-7 -8 -8 -3.3042 5.6251
-7 -8 -7 2.7194 2.7022
-7 -8 -6 2.8615 4.8846
-7 -8 -5 5.0358 -2.3478
-7 -8 -4 4.0670 -1.8214
-7 -8 -3 1.4055 0.9143
-7 -8 -2 3.5339 -2.5444
-7 -8 -1 -5.8148 3.8739
-7 -7 -27 -0.6047 1.3151
-7 -7 -26 0.8597 2.6511
-7 -7 -25 2.3637 -1.1235
-7 -7 -24 -2.8349 -1.3161
-7 -7 -23 -1.0068 0.6701
-7 -7 -22 0.4402 -0.7050
-7 -7 -21 -3.0378 -1.7928
-7 -7 -20 1.9739 0.4858
-7 -7 -19 2.9467 -0.5874
-7 -7 -18 -0.7936 -2.5957
-7 -7 -17 2.7260 2.0471
-7 -7 -16 -0.3521 -1.6196
-7 -7 -15 -2.5440 1.0793
-7 -7 -14 -2.1145 1.0537
-7 -7 -13 -1.8205 -1.8367
-7 -7 -12 0.7950 7.0215
-7 -7 -11 0.7821 0.7169
-7 -7 -10 2.7152 2.3671
-7 -7 -9 1.8474 1.1878
-7 -7 -8 0.2897 -6.7695
-7 -7 -7 -1.4933 -3.1385
-7 -7 -6 1.4566 -6.3035
-7 -7 -5 0.9114 -0.8303
-7 -7 -4 -1.5852 -0.9567
-7 -7 -3 5.4830 3.1738
-7 -7 -2 -4.0796 3.6706
-7 -7 -1 -6.2629 3.7563
-7 -6 -27 -1.6822 1.1865
-7 -6 -26 1.4708 1.8145
-7 -6 -25 1.6119 -1.1500
-7 -6 -24 -2.4174 -0.7372
-7 -6 -23 -0.4663 0.1961
-7 -6 -22 -2.1290 -0.9464
-7 -6 -21 -1.0022 0.4861
-7 -6 -20 -1.3692 2.1656
-7 -6 -19 1.2521 -0.3912
-7 -6 -18 2.8844 -2.6467
-7 -6 -17 -0.2949 -1.5713
-7 -6 -16 0.5746 -0.0686
-7 -6 -15 -1.3727 1.5556
-7 -6 -14 3.2376 3.0899
-7 -6 -13 1.2996 3.5407
-7 -6 -12 0.9062 -2.7612
-7 -6 -11 4.3091 -2.8040
-7 -6 -10 -7.2804 -2.3017
-7 -6 -9 -4.2734 -4.9214
-7 -6 -8 -3.7947 1.1178
-7 -6 -7 -2.8717 1.8723
-7 -6 -6 1.6390 2.6966
-7 -6 -5 0.9668 3.2887
-7 -6 -4 4.5880 0.4082
-7 -6 -3 2.1534 1.6615
-7 -6 -2 7.3642 -1.8997
-7 -6 -1 -0.4935 1.0942
-7 -5 -27 -0.4441 -0.8599
-7 -5 -26 1.0212 2.1244
-7 -5 -25 2.7874 0.4905
-7 -5 -24 -2.3299 -2.8582
-7 -5 -23 -2.0846 1.6266
-7 -5 -22 0.7456 1.5976
-7 -5 -21 -3.4598 -1.4882
-7 -5 -20 -0.5022 0.8099
-7 -5 -19 4.2760 0.9595
-7 -5 -18 -0.3492 -3.7698
-7 -5 -17 1.9963 0.5350
-7 -5 -16 1.9756 -1.4557
-7 -5 -15 -3.6329 -1.5692
-7 -5 -14 -1.4163 1.3194
-7 -5 -13 -2.0891 -5.1245
-7 -5 -12 -1.4550 5.5284
-7 -5 -11 1.9578 4.9334
-7 -5 -10 1.6598 1.0045
-7 -5 -9 1.3059 7.7846
-7 -5 -8 -0.1296 -3.4210
-7 -5 -7 -1.9597 -2.6515
-7 -5 -6 1.0313 -4.4550
-7 -5 -5 3.0847 -5.2482
-7 -5 -4 -0.1923 -2.6953
-7 -5 -3 4.7271 -2.2603
-7 -5 -2 2.4403 2.3203
-7 -5 -1 -6.3381 0.8932
-7 -4 -27 -1.6775 0.7183
-7 -4 -26 -2.8584 4.5875
-7 -4 -25 4.0564 0.1751
-7 -4 -24 -0.0072 -0.1612
-7 -4 -23 0.5002 0.4550
-7 -4 -22 1.6538 -2.6214
-7 -4 -21 -2.5045 -1.2613
-7 -4 -20 -3.2310 1.4818
-7 -4 -19 -2.0172 1.0700
-7 -4 -18 0.6953 0.5307
-7 -4 -17 1.2281 0.2020
-7 -4 -16 1.3207 -2.4933
-7 -4 -15 -2.2519 -0.7699
-7 -4 -14 1.9750 1.1842
-7 -4 -13 2.9004 1.5577
-7 -4 -12 -0.8024 2.5414
-7 -4 -11 8.3657 -0.4824
-7 -4 -10 -1.3601 -0.2273
-7 -4 -9 -5.0293 -2.2878
-7 -4 -8 -0.5701 -4.6713
-7 -4 -7 -7.5152 -1.1899
-7 -4 -6 -2.1755 -2.5666
-7 -4 -5 -1.8005 1.9332
-7 -4 -4 1.4321 4.3771
-7 -4 -3 0.8768 2.4849
-7 -4 -2 5.0137 1.3556
-7 -4 -1 4.9632 -0.4479
-7 -3 -28 2.2897 3.6055
-7 -3 -27 -0.0731 0.0498
-7 -3 -26 0.4811 0.0515
-7 -3 -25 2.4843 2.0269
-7 -3 -24 -0.5165 -3.5772
-7 -3 -23 -1.4744 -0.7180
-7 -3 -22 -0.0168 2.4724
-7 -3 -21 -2.1516 0.4060
-7 -3 -20 -3.0843 1.8131
-7 -3 -19 2.5549 2.0878
-7 -3 -18 1.8299 -2.8112
-7 -3 -17 0.3868 -0.3855
-7 -3 -16 4.0978 -0.2748
-7 -3 -15 -2.1174 -2.8507
-7 -3 -14 -1.9836 1.3406
-7 -3 -13 -0.0131 -6.2638
-7 -3 -12 -4.4742 -0.5405
-7 -3 -11 1.5618 5.3644
-7 -3 -10 1.7192 -2.6391
-7 -3 -9 -0.6304 10.1783
-7 -3 -8 0.5752 4.2620
-7 -3 -7 -2.7613 -1.0600
-7 -3 -6 -0.9538 1.6621
-7 -3 -5 2.2296 -6.9958
-7 -3 -4 1.8709 -3.8426
-7 -3 -3 2.0835 -4.1909
-7 -3 -2 6.1864 -0.3414
-7 -3 -1 -1.4711 -1.6681
-7 -2 -28 0.3107 -2.0967
-7 -2 -27 0.8144 -2.2019
-7 -2 -26 -4.7491 4.1849
-7 -2 -25 1.3296 1.9355
-7 -2 -24 1.4061 0.6467
-7 -2 -23 0.6216 2.0699
-7 -2 -22 5.5327 -2.1138
-7 -2 -21 -0.6067 -2.3684
-7 -2 -20 -2.7159 -0.7497
-7 -2 -19 -2.7900 -0.1424
-7 -2 -18 -3.1394 1.4999
-7 -2 -17 0.6037 2.7704
-7 -2 -16 2.3212 -1.0348
-7 -2 -15 -1.8941 -2.6269
-7 -2 -14 -0.6491 0.3180
-7 -2 -13 2.7786 -2.0110
-7 -2 -12 -3.2680 2.6565
-7 -2 -11 6.4163 3.8092
-7 -2 -10 5.2457 0.3107
-7 -2 -9 -2.7591 3.4261
-7 -2 -8 5.6919 -4.2346
-7 -2 -7 -6.5025 -3.8561
-7 -2 -6 -6.3073 -4.4791
-7 -2 -5 -1.9856 -4.9184
-7 -2 -4 -2.7654 3.9627
-7 -2 -3 -0.2595 2.1981
-7 -2 -2 -0.9891 3.3418
-7 -2 -1 4.6822 1.5834
-7 -1 -28 1.3486 1.0332
-7 -1 -27 1.1166 0.9536
-7 -1 -26 0.1260 -0.8115
-7 -1 -25 1.7427 1.3783
-7 -1 -24 0.1264 -1.5071
-7 -1 -23 0.2270 -1.5273
-7 -1 -22 -0.4369 0.2407
-7 -1 -21 -0.7109 0.6055
-7 -1 -20 -1.9265 2.5621
-7 -1 -19 -1.8980 1.5370
-7 -1 -18 1.7583 -0.9228
-7 -1 -17 -0.4537 -0.2392
-7 -1 -16 2.2833 1.3569
-7 -1 -15 2.3872 -1.8336
-7 -1 -14 -1.5353 1.5132
-7 -1 -13 2.3402 -2.8368
-7 -1 -12 -2.6416 -5.8165
-7 -1 -11 -1.8930 2.4994
-7 -1 -10 1.2737 -6.8622
-7 -1 -9 -2.1621 4.6213
-7 -1 -8 0.3749 10.0752
-7 -1 -7 -1.5865 -0.3281
-7 -1 -6 -1.2655 8.1629
-7 -1 -5 -0.9447 -3.1644
-7 -1 -4 1.5516 -4.7792
-7 -1 -3 -0.3587 -1.6287
-7 -1 -2 3.4493 -2.1096
-7 -1 -1 4.0661 -1.4188
-6 -26 -4 -1.8240 -0.7783
-6 -26 -3 -1.0827 2.5863
-6 -26 -2 -1.2008 -1.6603
-6 -26 -1 -0.9931 -4.8152
-6 -25 -9 2.0606 -2.0164
-6 -25 -8 2.7279 -0.1966
-6 -25 -7 0.8805 -0.7025
-6 -25 -6 0.5753 0.0494
-6 -25 -5 -1.7456 0.3929
-6 -25 -4 -2.6028 0.1316
-6 -25 -3 -3.9187 1.0037
-6 -25 -2 -1.5897 0.4753
-6 -25 -1 -1.8433 0.1003
-6 -24 -12 1.9339 -0.9048
-6 -24 -11 -1.3093 -0.3631
-6 -24 -10 -0.8373 -2.5914
-6 -24 -9 -1.2593 -0.4335
-6 -24 -8 -2.4391 0.3207
-6 -24 -7 0.9119 2.5252
-6 -24 -6 -0.4024 0.8049
-6 -24 -5 2.9081 2.8766
-6 -24 -4 1.1757 1.8611
-6 -24 -3 0.0397 0.4997
-6 -24 -2 0.5289 1.7655
-6 -24 -1 -2.1564 -3.5370
-6 -23 -14 -0.6852 -0.4811
-6 -23 -13 3.5658 0.2112
-6 -23 -12 -1.0450 4.6604
-6 -23 -11 -0.5248 0.6337
-6 -23 -10 -2.7200 1.1135
-6 -23 -9 -0.6052 -1.2066
-6 -23 -8 3.4152 -1.5928
-6 -23 -7 2.1191 -0.1157
-6 -23 -6 5.6512 0.0203
-6 -23 -5 0.6670 -0.5469
-6 -23 -4 -1.6191 -2.0882
-6 -23 -3 -3.0376 0.7460
-6 -23 -2 -3.3723 1.7945
-6 -23 -1 -3.0022 0.8225
-6 -22 -16 -0.0087 2.4536
-6 -22 -15 0.4768 -2.1975
-6 -22 -14 0.8079 0.5578
-6 -22 -13 -0.1173 1.6353
-6 -22 -12 1.1248 -0.5725
-6 -22 -11 0.0600 1.8551
-6 -22 -10 -0.0234 -2.3298
-6 -22 -9 1.2412 -1.9104
-6 -22 -8 -1.5820 -4.7330
-6 -22 -7 0.1280 -0.5394
-6 -22 -6 -3.4857 2.2094
-6 -22 -5 -0.6708 0.8733
-6 -22 -4 1.8892 5.1596
-6 -22 -3 1.2156 0.1117
-6 -22 -2 3.5818 1.9494
-6 -22 -1 0.5530 0.1863
-6 -21 -18 2.4067 -1.3121
-6 -21 -17 -2.1255 1.2801
-6 -21 -16 -0.3661 -0.8697
-6 -21 -15 0.7440 -2.4765
-6 -21 -14 -3.8505 0.4006
-6 -21 -13 4.0687 -1.6066
-6 -21 -12 1.1275 1.1931
-6 -21 -11 -1.1983 1.8341
-6 -21 -10 -1.7261 0.5211
-6 -21 -9 -5.7482 -0.7301
-6 -21 -8 0.4116 0.1488
-6 -21 -7 0.2168 0.6618
-6 -21 -6 5.7477 0.8918
-6 -21 -5 5.0817 1.3553
-6 -21 -4 1.3808 -4.6053
-6 -21 -3 0.6178 -2.0842
-6 -21 -2 -2.6859 1.5131
-6 -21 -1 -0.8269 1.2912
-6 -20 -19 -2.1645 1.0668
-6 -20 -18 -1.1256 0.0110
-6 -20 -17 0.7236 -2.9878
-6 -20 -16 1.4824 1.8753
-6 -20 -15 1.2957 -2.2357
-6 -20 -14 0.1111 -0.5532
-6 -20 -13 -0.4339 4.8416
-6 -20 -12 -0.7395 -1.2799
-6 -20 -11 -1.6052 4.0640
-6 -20 -10 -0.4799 0.7976
-6 -20 -9 2.9099 -1.5605
-6 -20 -8 1.1704 -3.4825
-6 -20 -7 3.2590 -6.2225
-6 -20 -6 -3.1965 0.0564
-6 -20 -5 -4.9862 -1.4146
-6 -20 -4 -0.4162 3.9701
-6 -20 -3 -1.1539 0.7263
-6 -20 -2 3.2280 0.5806
-6 -20 -1 4.7344 3.5596
-6 -19 -21 -0.6171 1.9509
-6 -19 -20 -2.0897 -0.1091
-6 -19 -19 -0.1967 0.2101
-6 -19 -18 2.8521 -1.9355
-6 -19 -17 -1.1167 -0.5568
-6 -19 -16 -0.1794 2.1593
-6 -19 -15 5.3576 -1.4561
-6 -19 -14 -4.1998 -0.2083
-6 -19 -13 1.3511 0.0933
-6 -19 -12 3.8305 -0.6894
-6 -19 -11 -3.0774 1.0090
-6 -19 -10 2.2749 0.2605
-6 -19 -9 -5.1792 -1.7817
-6 -19 -8 -4.8159 0.5806
-6 -19 -7 -1.5953 1.2937
-6 -19 -6 0.8004 -0.0603
-6 -19 -5 3.6206 4.9902
-6 -19 -4 3.3137 -2.0607
-6 -19 -3 4.8035 -4.3467
-6 -19 -2 -0.8660 -0.5741
-6 -19 -1 4.0852 0.2429
-6 -18 -22 1.3618 1.1855
-6 -18 -21 -1.0506 -1.7017
-6 -18 -20 -1.0970 -0.1713
-6 -18 -19 -1.7041 1.6584
-6 -18 -18 -1.2448 -0.0437
-6 -18 -17 0.3931 -3.7824
-6 -18 -16 0.1179 -0.6650
-6 -18 -15 1.2734 -2.2224
-6 -18 -14 1.7647 -3.1498
-6 -18 -13 0.5391 6.4185
-6 -18 -12 -0.6590 -0.6892
-6 -18 -11 -1.2212 2.9341
-6 -18 -10 -2.8043 5.3662
-6 -18 -9 0.6167 -1.3597
-6 -18 -8 1.5576 0.7832
-6 -18 -7 4.8815 -5.4121
-6 -18 -6 1.2832 -3.2094
-6 -18 -5 -4.1863 -2.9684
-6 -18 -4 -1.6866 0.6470
-6 -18 -3 -4.1900 0.3269
-6 -18 -2 -1.0876 -2.5067
-6 -18 -1 3.4207 4.4211
-6 -17 -23 1.8162 1.1187
-6 -17 -22 -1.7902 -0.3299
-6 -17 -21 0.5152 1.9376
-6 -17 -20 -2.9027 -0.3968
-6 -17 -19 -3.2423 -1.6271
-6 -17 -18 -0.3428 -0.0397
-6 -17 -17 -1.1095 -1.0674
-6 -17 -16 -1.4537 1.7628
-6 -17 -15 6.6481 1.1393
-6 -17 -14 0.6818 -1.4110
-6 -17 -13 -1.4994 -0.9607
-6 -17 -12 5.6455 -0.6457
-6 -17 -11 -3.3649 0.5676
-6 -17 -10 1.9713 -0.0233
-6 -17 -9 0.7957 -0.7472
-6 -17 -8 -5.7271 0.9221
-6 -17 -7 -2.7603 1.4986
-6 -17 -6 -2.1509 -2.2683
-6 -17 -5 -0.9168 4.6451
-6 -17 -4 -0.7729 1.8921
-6 -17 -3 5.9524 -3.0481
-6 -17 -2 0.6483 -0.6644
-6 -17 -1 4.9429 -1.4449
-6 -16 -24 0.9937 1.7652
-6 -16 -23 0.0776 0.8485
-6 -16 -22 1.7225 3.4925
-6 -16 -21 -1.2739 -0.3106
-6 -16 -20 -1.3984 -0.2888
-6 -16 -19 0.5479 3.1127
-6 -16 -18 -0.7287 -0.1541
-6 -16 -17 0.6994 -1.4765
-6 -16 -16 -0.3186 -2.2724
-6 -16 -15 -2.4934 -2.9837
-6 -16 -14 0.7740 -4.9129
-6 -16 -13 2.5863 2.7176
-6 -16 -12 -0.5678 0.3557
-6 -16 -11 1.5991 0.0882
-6 -16 -10 -0.6204 6.9122
-6 -16 -9 -2.5168 0.0817
-6 -16 -8 0.2886 2.8289
-6 -16 -7 3.0806 -0.8784
-6 -16 -6 2.8614 -2.2246
-6 -16 -5 -0.5197 -2.4718
-6 -16 -4 0.3701 -3.2613
-6 -16 -3 -4.3860 1.0029
-6 -16 -2 -3.4942 -4.8048
-6 -16 -1 -1.5533 1.1985
-6 -15 -25 1.0539 0.2967
-6 -15 -24 1.2806 -0.3761
-6 -15 -23 2.6229 3.0590
-6 -15 -22 0.2068 1.3446
-6 -15 -21 2.3558 -0.1305
-6 -15 -20 -1.1787 0.4707
-6 -15 -19 -2.1192 -3.4233
-6 -15 -18 -3.2705 -1.3159
-6 -15 -17 -3.4313 1.4056
-6 -15 -16 -1.8002 1.1503
-6 -15 -15 1.5088 2.2748
-6 -15 -14 3.3532 0.5110
-6 -15 -13 -1.1674 -2.3877
-6 -15 -12 4.0909 -2.5871
-6 -15 -11 -0.5153 -0.1810
-6 -15 -10 -0.5555 -1.1811
-6 -15 -9 3.9769 -0.7657
-6 -15 -8 -0.9257 1.0833
-6 -15 -7 -1.1639 2.9280
-6 -15 -6 -3.1687 -1.8991
-6 -15 -5 -1.8729 1.9018
-6 -15 -4 -6.2249 3.3882
-6 -15 -3 0.5611 -1.9999
-6 -15 -2 2.6341 1.2057
-6 -15 -1 0.3450 -1.0686
-6 -14 -25 -0.0258 -2.6457
-6 -14 -24 2.8969 -0.4011
-6 -14 -23 -1.8505 -1.0955
-6 -14 -22 0.3764 4.0779
-6 -14 -21 0.2732 1.4778
-6 -14 -20 -3.2517 -0.8455
-6 -14 -19 2.0655 4.7390
-6 -14 -18 1.5806 -1.0116
-6 -14 -17 -0.4105 1.0182
-6 -14 -16 1.7607 1.4599
-6 -14 -15 -3.3955 -2.8367
-6 -14 -14 -4.2241 -3.1942
-6 -14 -13 2.5475 -1.0129
-6 -14 -12 -0.2442 -1.2113
-6 -14 -11 0.9868 -2.9467
-6 -14 -10 2.8424 3.8618
-6 -14 -9 -2.4076 0.1023
-6 -14 -8 -1.0053 2.7122
-6 -14 -7 1.0758 2.9479
-6 -14 -6 2.4261 0.9089
-6 -14 -5 1.6352 2.8278
-6 -14 -4 3.1052 -5.3647
-6 -14 -3 -1.8817 0.3571
-6 -14 -2 -2.5929 -3.4212
-6 -14 -1 -3.2675 -3.5176
-6 -13 -26 -2.2447 -3.2091
-6 -13 -25 0.1955 1.7270
-6 -13 -24 1.5195 -1.0903
-6 -13 -23 1.4471 1.0864
-6 -13 -22 1.6043 3.8921
-6 -13 -21 3.7696 -1.2545
-6 -13 -20 -0.2802 0.5000
-6 -13 -19 1.1822 -1.1722
-6 -13 -18 -0.3284 -4.1573
-6 -13 -17 -5.3429 1.4776
-6 -13 -16 -0.3854 1.9369
-6 -13 -15 -2.0758 1.2596
-6 -13 -14 0.3344 2.7632
-6 -13 -13 0.1076 -0.0891
-6 -13 -12 0.6520 -2.7348
-6 -13 -11 0.5789 -1.0550
-6 -13 -10 -2.4336 -1.7289
-6 -13 -9 3.0526 -0.9919
-6 -13 -8 3.2106 -2.1253
-6 -13 -7 4.0493 1.1506
-6 -13 -6 -0.6685 0.9702
-6 -13 -5 -0.6869 -0.9777
-6 -13 -4 -6.2633 3.6832
-6 -13 -3 -8.2980 -0.5646
-6 -13 -2 1.7471 1.1995
-6 -13 -1 -4.0702 0.8586
-6 -12 -27 2.5815 2.6515
-6 -12 -26 1.7745 -1.3874
-6 -12 -25 -0.8879 -3.2935
-6 -12 -24 3.0330 -2.7888
-6 -12 -23 -1.9002 -3.8818
-6 -12 -22 -2.9484 1.4531
-6 -12 -21 1.4549 3.1711
-6 -12 -20 -2.5479 -1.5751
-6 -12 -19 0.9576 4.1843
-6 -12 -18 4.4685 -0.8346
-6 -12 -17 -0.9847 -0.8810
-6 -12 -16 1.8193 5.0320
-6 -12 -15 0.1862 -0.3856
-6 -12 -14 -6.5890 -0.2390
-6 -12 -13 -0.4865 0.0069
-6 -12 -12 1.0062 -0.4629
-6 -12 -11 -0.3916 -4.6050
-6 -12 -10 3.2107 -1.2769
-6 -12 -9 -1.4692 -1.6601
-6 -12 -8 -1.9316 -1.7835
-6 -12 -7 -2.1485 3.8835
-6 -12 -6 -0.0319 2.5201
-6 -12 -5 2.9915 8.3032
-6 -12 -4 4.7777 0.0706
-6 -12 -3 2.1267 -0.5162
-6 -12 -2 0.2911 -0.6832
-6 -12 -1 -0.6560 -6.7817
-6 -11 -27 -0.0941 0.2639
-6 -11 -26 -3.2910 -3.2223
-6 -11 -25 -2.7598 2.2572
-6 -11 -24 0.0453 0.6822
-6 -11 -23 -0.1617 -0.6481
-6 -11 -22 1.5621 2.9473
-6 -11 -21 3.5172 -1.8340
-6 -11 -20 -0.2063 -0.5941
-6 -11 -19 1.8436 1.8834
-6 -11 -18 4.4766 -3.5376
-6 -11 -17 -3.8980 -0.2429
-6 -11 -16 0.1798 1.8307
-6 -11 -15 -1.3071 -0.5527
-6 -11 -14 -2.1392 2.4958
-6 -11 -13 1.3188 1.8937
-6 -11 -12 -2.0726 -0.6409
-6 -11 -11 0.4660 0.8020
-6 -11 -10 -4.3170 -1.4814
-6 -11 -9 -1.0886 0.9298
-6 -11 -8 3.7886 -1.3344
-6 -11 -7 5.7964 -4.6147
-6 -11 -6 5.5679 1.7376
-6 -11 -5 3.0972 -2.9255
-6 -11 -4 -0.8024 -0.0514
-6 -11 -3 -11.3755 2.4833
-6 -11 -2 -3.1150 0.4691
-6 -11 -1 -7.2772 1.3345
-6 -10 -28 -2.7748 0.6339
-6 -10 -27 0.4189 3.8173
-6 -10 -26 3.3375 3.8417
-6 -10 -25 1.8833 -0.1968
-6 -10 -24 2.4239 -3.9900
-6 -10 -23 -1.3601 -3.7152
-6 -10 -22 -4.1198 -2.7180
-6 -10 -21 -1.1562 1.6824
-6 -10 -20 -1.1690 -0.5751
-6 -10 -19 0.0291 1.3221
-6 -10 -18 4.5441 0.7098
-6 -10 -17 1.2281 -2.4864
-6 -10 -16 0.8245 3.5451
-6 -10 -15 2.6210 0.4623
-6 -10 -14 -4.0023 1.9293
-6 -10 -13 -3.2013 1.3794
-6 -10 -12 0.6363 2.3127
-6 -10 -11 -0.7893 -0.1710
-6 -10 -10 3.9662 -5.6974
-6 -10 -9 0.3185 -2.1920
-6 -10 -8 -1.7490 -6.0879
-6 -10 -7 -3.2235 -1.2943
-6 -10 -6 -6.1423 1.9820
-6 -10 -5 -0.2578 6.6900
-6 -10 -4 4.1223 7.2177
-6 -10 -3 4.8151 2.8652
-6 -10 -2 3.4074 3.7018
-6 -10 -1 4.0617 -6.2793
-6 -9 -28 0.6703 -1.4595
-6 -9 -27 2.2704 -0.6085
-6 -9 -26 -1.6965 -2.8476
-6 -9 -25 -2.8872 2.4258
-6 -9 -24 -1.1481 1.9220
-6 -9 -23 -2.4269 0.2842
-6 -9 -22 0.5122 2.2072
-6 -9 -21 1.3354 -3.5572
-6 -9 -20 -0.9377 -2.1977
-6 -9 -19 0.4923 2.8163
-6 -9 -18 6.5241 -1.5274
-6 -9 -17 -0.6685 -0.4291
-6 -9 -16 0.3630 1.2422
-6 -9 -15 0.5740 -2.4812
-6 -9 -14 -3.9156 0.7784
-6 -9 -13 3.8396 1.7390
-6 -9 -12 -3.2327 -0.7309
-6 -9 -11 -0.5580 3.7503
-6 -9 -10 -1.8977 0.4325
-6 -9 -9 -6.9764 -0.1039
-6 -9 -8 2.0855 4.9321
-6 -9 -7 2.6410 -4.9562
-6 -9 -6 6.4908 -1.0236
-6 -9 -5 7.5941 -1.2992
-6 -9 -4 5.9369 -5.5480
-6 -9 -3 -4.2713 2.8488
-6 -9 -2 -4.8180 1.0316
-6 -9 -1 -6.2557 -0.2108
-6 -8 -29 -0.2182 -2.4917
-6 -8 -28 -2.7245 -1.0835
-6 -8 -27 -1.8843 0.6352
-6 -8 -26 0.6279 3.8388
-6 -8 -25 3.6044 4.9199
-6 -8 -24 3.9716 -3.0690
-6 -8 -23 -1.3181 -1.0350
-6 -8 -22 -2.0766 -2.1531
-6 -8 -21 -2.5677 -2.0823
-6 -8 -20 -2.8345 0.2365
-6 -8 -19 -0.5771 -0.9979
-6 -8 -18 1.4483 0.6570
-6 -8 -17 2.2644 -1.9699
-6 -8 -16 1.8077 2.0601
-6 -8 -15 2.5403 -1.7915
-6 -8 -14 0.4250 1.8098
-6 -8 -13 -2.1804 3.5120
-6 -8 -12 -0.8596 0.5676
-6 -8 -11 -2.5301 7.2877
-6 -8 -10 3.2498 -4.3063
-6 -8 -9 3.3935 -4.0328
-6 -8 -8 -0.3202 -4.1834
-6 -8 -7 0.7988 -8.1432
-6 -8 -6 -6.8646 -0.5818
-6 -8 -5 -6.4217 0.9010
-6 -8 -4 -1.1011 6.3887
-6 -8 -3 3.2323 4.7036
-6 -8 -2 3.2068 6.9377
-6 -8 -1 5.0763 0.2276
-6 -7 -29 1.7058 0.1985
-6 -7 -28 -0.5324 -0.7721
-6 -7 -27 2.3117 -1.1237
-6 -7 -26 -0.0780 -3.5047
-6 -7 -25 -1.9311 2.1018
-6 -7 -24 0.8612 2.8573
-6 -7 -23 -2.1605 0.7364
-6 -7 -22 -0.3371 3.4269
-6 -7 -21 -0.4706 -3.2216
-6 -7 -20 -2.1238 -4.4928
-6 -7 -19 -2.4906 2.2742
-6 -7 -18 4.8802 0.2276
-6 -7 -17 1.9299 0.1131
-6 -7 -16 -0.0254 1.7299
-6 -7 -15 4.5899 -3.4484
-6 -7 -14 -5.2081 -1.7786
-6 -7 -13 4.3279 0.4963
-6 -7 -12 0.0693 -3.0367
-6 -7 -11 -4.6923 3.7344
-6 -7 -10 2.7395 4.5677
-6 -7 -9 -9.2739 -2.8947
-6 -7 -8 -2.2505 7.1778
-6 -7 -7 0.6130 0.7272
-6 -7 -6 1.1165 -4.1135
-6 -7 -5 7.1809 1.6463
-6 -7 -4 6.6490 -6.3553
-6 -7 -3 5.3956 1.0801
-6 -7 -2 -1.0664 3.0654
-6 -7 -1 1.5878 -2.1411
-6 -6 -29 1.4701 -1.6798
-6 -6 -28 -1.5313 -1.0407
-6 -6 -27 -1.5344 0.4572
-6 -6 -26 -1.7467 -0.8518
-6 -6 -25 1.1360 5.4089
-6 -6 -24 4.6813 -0.7590
-6 -6 -23 -0.3775 -0.5129
-6 -6 -22 -0.4464 1.9015
-6 -6 -21 0.0585 -2.8604
-6 -6 -20 -3.0039 -0.0365
-6 -6 -19 -1.1356 -1.1802
-6 -6 -18 -1.6734 0.0660
-6 -6 -17 -0.9386 -2.4967
-6 -6 -16 1.7899 1.3828
-6 -6 -15 0.9374 -2.4286
-6 -6 -14 2.5231 -2.7663
-6 -6 -13 2.2377 6.2459
-6 -6 -12 -0.5244 -2.0630
-6 -6 -11 -2.9831 8.8357
-6 -6 -10 0.5660 4.8171
-6 -6 -9 2.6357 -4.9406
-6 -6 -8 0.4020 0.1797
-6 -6 -7 4.3415 -10.5204
-6 -6 -6 -1.0156 -4.4468
-6 -6 -5 -4.5744 -2.4725
-6 -6 -4 -5.3117 0.2929
-6 -6 -3 -2.1430 2.4501
-6 -6 -2 0.8421 1.7816
-6 -6 -1 -0.9234 6.2019
-6 -5 -30 -0.9246 2.3831
-6 -5 -29 3.2075 0.7789
-6 -5 -28 0.2744 -0.0258
-6 -5 -27 0.4154 -0.6590
-6 -5 -26 0.6614 -3.4249
-6 -5 -25 -2.7182 -0.1422
-6 -5 -24 1.6837 3.2030
-6 -5 -23 0.3836 1.4694
-6 -5 -22 -0.0278 2.9597
-6 -5 -21 -0.2886 -0.4770
-6 -5 -20 -1.6327 -5.1818
-6 -5 -19 -4.1629 -0.6159
-6 -5 -18 -0.2246 2.0361
-6 -5 -17 2.5902 1.3615
-6 -5 -16 -1.8995 2.8720
-6 -5 -15 6.6875 -1.4077
-6 -5 -14 -1.9965 -3.4197
-6 -5 -13 0.9892 -1.2356
-6 -5 -12 6.2597 -5.5208
-6 -5 -11 -5.2393 -0.6761
-6 -5 -10 4.4849 6.6585
-6 -5 -9 -6.2474 -2.3187
-6 -5 -8 -7.9956 5.4028
-6 -5 -7 -0.3768 5.4819
-6 -5 -6 -5.0771 -5.5970
-6 -5 -5 4.1698 2.6493
-6 -5 -4 1.3868 -3.9335
-6 -5 -3 6.5878 -1.6801
-6 -5 -2 3.1592 6.1345
-6 -5 -1 5.8954 -1.7486
-6 -4 -30 1.2882 -0.2887
-6 -4 -29 1.9267 -0.9861
-6 -4 -28 -0.3421 -1.8697
-6 -4 -27 0.2068 2.4178
-6 -4 -26 -1.2750 -2.7607
-6 -4 -25 -0.9918 1.5704
-6 -4 -24 2.1757 2.1973
-6 -4 -23 -0.0515 -1.5895
-6 -4 -22 -0.3460 3.9880
-6 -4 -21 1.5716 -0.6073
-6 -4 -20 -0.2429 -0.6908
-6 -4 -19 1.2339 -0.0453
-6 -4 -18 -0.9316 -0.0848
-6 -4 -17 -4.1964 -2.1083
-6 -4 -16 -0.8808 -0.4544
-6 -4 -15 -1.6117 -0.2024
-6 -4 -14 0.1226 -6.8508
-6 -4 -13 4.9368 3.4166
-6 -4 -12 1.4536 -2.5751
-6 -4 -11 -1.3784 2.6832
-6 -4 -10 1.0577 12.5531
-6 -4 -9 -0.8676 -0.1713
-6 -4 -8 -2.0821 5.9618
-6 -4 -7 4.7525 -5.8048
-6 -4 -6 1.5766 -8.2854
-6 -4 -5 2.6150 -1.8386
-6 -4 -4 -0.3615 -6.3173
-6 -4 -3 -6.8035 0.7802
-6 -4 -2 -0.9674 -5.2152
-6 -4 -1 -6.0305 3.4446
-6 -3 -30 -1.7562 1.7646
-6 -3 -29 1.8632 0.5734
-6 -3 -28 2.1935 0.6240
-6 -3 -27 -0.3095 -0.7167
-6 -3 -26 1.6675 -2.1557
-6 -3 -25 -2.2462 -1.5200
-6 -3 -24 0.5164 0.6207
-6 -3 -23 2.1079 3.3010
-6 -3 -22 -0.0737 2.4939
-6 -3 -21 0.8229 0.1612
-6 -3 -20 -0.8871 -2.6503
-6 -3 -19 -2.3808 -4.2037
-6 -3 -18 -3.6944 0.2521
-6 -3 -17 0.2384 3.2734
-6 -3 -16 -2.0878 3.0916
-6 -3 -15 3.1756 2.2597
-6 -3 -14 1.5476 -1.1856
-6 -3 -13 -2.6422 -1.8308
-6 -3 -12 7.5679 -4.5360
-6 -3 -11 -0.5815 -5.8323
-6 -3 -10 5.8776 2.8526
-6 -3 -9 1.9790 -0.5762
-6 -3 -8 -9.9199 2.5041
-6 -3 -7 -0.2528 7.2674
-6 -3 -6 -10.1465 -5.0236
-6 -3 -5 -1.4161 2.2870
-6 -3 -4 -1.1348 0.6694
-6 -3 -3 -1.3090 -5.4070
-6 -3 -2 5.1233 4.9148
-6 -3 -1 1.5451 1.4367
-6 -2 -30 0.5740 -0.9196
-6 -2 -29 0.5360 -0.2149
-6 -2 -28 -0.9683 -2.4456
-6 -2 -27 1.5909 1.8222
-6 -2 -26 0.3362 -2.0603
-6 -2 -25 -0.3204 -3.6169
-6 -2 -24 0.7711 3.2647
-6 -2 -23 -1.3537 -1.2643
-6 -2 -22 -1.1423 3.4793
-6 -2 -21 0.2779 3.1856
-6 -2 -20 -0.5387 -1.2010
-6 -2 -19 3.9871 1.5209
-6 -2 -18 3.8678 -0.9104
-6 -2 -17 -3.3244 -1.1338
-6 -2 -16 -2.4304 -0.8270
-6 -2 -15 -3.1367 1.6276
-6 -2 -14 -3.7487 -4.6856
-6 -2 -13 3.2843 -1.4579
-6 -2 -12 2.5478 -2.9027
-6 -2 -11 0.3499 -6.8263
-6 -2 -10 3.2180 9.8968
-6 -2 -9 -1.7814 3.4246
-6 -2 -8 -6.2795 9.0463
-6 -2 -7 2.6790 7.1935
-6 -2 -6 0.5455 -7.6316
-6 -2 -5 4.5292 2.0628
-6 -2 -4 9.3227 -8.4680
-6 -2 -3 -5.3355 -2.9619
-6 -2 -2 -2.8245 -4.5842
-6 -2 -1 -4.9666 -3.4885
-6 -1 -30 -1.0682 1.7117
-6 -1 -29 -1.0229 -0.1019
-6 -1 -28 1.1862 1.1592
-6 -1 -27 -0.7535 -0.7042
-6 -1 -26 1.1137 -2.0633
-6 -1 -25 -0.2851 -0.3906
-6 -1 -24 0.1131 -2.6234
-6 -1 -23 3.4071 2.2610
-6 -1 -22 -0.2601 4.7440
-6 -1 -21 1.7364 -0.6902
-6 -1 -20 -0.5836 0.0562
-6 -1 -19 -0.8807 -2.8361
-6 -1 -18 -1.9398 -4.9486
-6 -1 -17 -3.1274 2.5598
-6 -1 -16 -0.4660 2.5553
-6 -1 -15 -0.1710 1.9622
-6 -1 -14 0.9569 3.3138
-6 -1 -13 -4.4527 -1.3960
-6 -1 -12 2.9043 -0.7058
-6 -1 -11 1.5885 -3.7129
-6 -1 -10 3.6685 -3.1898
-6 -1 -9 11.6445 0.5433
-6 -1 -8 -4.4978 -0.9365
-6 -1 -7 2.5904 3.4315
-6 -1 -6 -6.2085 -2.9759
-6 -1 -5 -9.7930 0.4267
-6 -1 -4 -0.3361 5.9222
-6 -1 -3 -9.2749 -3.1694
-6 -1 -2 2.8209 -0.8680
-6 -1 -1 -2.7342 2.1817
-5 -27 -8 1.1782 1.9255
-5 -27 -7 2.7564 1.3962
-5 -27 -6 -1.4583 3.0798
-5 -27 -5 -0.7149 0.7157
-5 -27 -4 -0.4130 -1.3539
-5 -27 -3 -1.3010 -2.7878
-5 -27 -2 0.4009 -1.7808
-5 -27 -1 -1.3373 -1.0083
-5 -26 -11 2.6566 -1.3961
-5 -26 -10 2.7894 -0.7921
-5 -26 -9 -0.1653 -2.5007
-5 -26 -8 0.1849 -1.3940
-5 -26 -7 -1.5797 0.5437
-5 -26 -6 1.9743 0.3285
-5 -26 -5 -1.2181 3.1082
-5 -26 -4 -0.8025 2.1525
-5 -26 -3 -0.0268 1.6970
-5 -26 -2 -4.2158 -0.3326
-5 -26 -1 0.8197 0.7831
-5 -25 -14 0.3991 -1.7429
-5 -25 -13 -0.9854 1.6396
-5 -25 -12 -2.8912 -2.6993
-5 -25 -11 -3.4956 0.2100
-5 -25 -10 -0.3208 0.2309
-5 -25 -9 1.6353 -2.7781
-5 -25 -8 1.3878 1.0918
-5 -25 -7 2.9222 0.6089
-5 -25 -6 1.8179 1.9461
-5 -25 -5 1.4990 3.8124
-5 -25 -4 0.2665 2.1111
-5 -25 -3 0.0461 -2.0261
-5 -25 -2 0.2423 -0.7257
-5 -25 -1 -3.0505 -4.4649
-5 -24 -16 1.7540 -0.1568
-5 -24 -15 -0.6480 0.6309
-5 -24 -14 -1.2940 1.2436
-5 -24 -13 -2.2266 0.8032
-5 -24 -12 -0.2662 1.8825
-5 -24 -11 -0.4787 -1.0929
-5 -24 -10 2.9467 -0.6131
-5 -24 -9 1.5296 -0.8087
-5 -24 -8 1.4191 -3.1219
-5 -24 -7 -0.4541 -1.5388
-5 -24 -6 0.6681 -1.3430
-5 -24 -5 1.3059 -0.9609
-5 -24 -4 -0.1463 1.0761
-5 -24 -3 -0.4134 4.4397
-5 -24 -2 -4.0908 1.1961
-5 -24 -1 -0.2015 3.0618
-5 -23 -18 3.2008 1.4526
-5 -23 -17 -1.1100 0.0367
-5 -23 -16 0.5426 -0.8819
-5 -23 -15 2.4330 0.2492
-5 -23 -14 1.0985 -3.0648
-5 -23 -13 0.8277 1.6756
-5 -23 -12 -0.1650 0.1118
-5 -23 -11 -3.5883 -1.8626
-5 -23 -10 -3.6494 2.3784
-5 -23 -9 0.4409 -3.1164
-5 -23 -8 -0.2071 -1.6798
-5 -23 -7 0.0455 -1.3913
-5 -23 -6 0.9009 -1.5380
-5 -23 -5 1.8421 3.1569
-5 -23 -4 2.1596 4.9828
-5 -23 -3 2.7717 0.9255
-5 -23 -2 4.2438 2.0325
-5 -23 -1 -3.1332 -3.1984
-5 -22 -20 -1.5818 -2.0485
-5 -22 -19 -0.5546 -0.2240
-5 -22 -18 -2.2167 -3.7828
-5 -22 -17 -1.7116 -1.1883
-5 -22 -16 1.9980 1.3632
-5 -22 -15 1.2833 -0.8172
-5 -22 -14 0.6708 1.2557
-5 -22 -13 -2.6928 1.2937
-5 -22 -12 -0.3827 2.9059
-5 -22 -11 -2.6108 -0.9898
-5 -22 -10 -0.6962 -1.2905
-5 -22 -9 0.5922 2.1020
-5 -22 -8 0.6037 -1.5363
-5 -22 -7 1.6679 0.2985
-5 -22 -6 -0.3163 -1.3798
-5 -22 -5 2.7991 -4.4700
-5 -22 -4 2.3026 -3.7419
-5 -22 -3 -0.5604 0.6173
-5 -22 -2 -3.1342 1.6536
-5 -22 -1 -0.9659 3.6177
-5 -21 -21 -2.0140 -0.8991
-5 -21 -20 -1.1855 0.4145
-5 -21 -19 -4.1156 1.0986
-5 -21 -18 3.3611 1.2922
-5 -21 -17 -0.1155 1.1553
-5 -21 -16 -2.2517 -0.4150
-5 -21 -15 3.2928 2.4212
-5 -21 -14 2.2381 -2.5141
-5 -21 -13 -0.1567 -1.2648
-5 -21 -12 1.2488 3.2821
-5 -21 -11 0.7277 -1.7779
-5 -21 -10 -4.5400 3.3391
-5 -21 -9 0.4804 0.3076
-5 -21 -8 0.2146 -2.1747
-5 -21 -7 -2.9460 -2.6291
-5 -21 -6 -0.2810 -4.9226
-5 -21 -5 -3.3741 -1.2826
-5 -21 -4 0.2843 3.4071
-5 -21 -3 3.5504 3.0483
-5 -21 -2 6.5974 3.7120
-5 -21 -1 1.1429 2.5074
-5 -20 -22 1.0251 1.9961
-5 -20 -21 3.5667 3.0305
-5 -20 -20 0.0040 -2.0564
-5 -20 -19 -0.6323 1.0444
-5 -20 -18 -0.8275 -0.1847
-5 -20 -17 -1.4392 -5.6312
-5 -20 -16 0.6186 -0.4935
-5 -20 -15 1.2346 -0.6137
-5 -20 -14 3.5034 0.5646
-5 -20 -13 -0.7592 0.6502
-5 -20 -12 0.5470 3.2163
-5 -20 -11 -1.4390 0.6469
-5 -20 -10 -3.0623 -3.5078
-5 -20 -9 -1.1015 3.0914
-5 -20 -8 -3.0167 -0.8760
-5 -20 -7 1.8442 3.0814
-5 -20 -6 -0.3754 3.3382
-5 -20 -5 1.1933 -4.2277
-5 -20 -4 4.3470 -3.6175
-5 -20 -3 1.1448 -5.6233
-5 -20 -2 -1.5515 -2.0748
-5 -20 -1 -1.4261 0.9872
-5 -19 -23 1.5300 1.4126
-5 -19 -22 0.6451 -0.3753
-5 -19 -21 -2.2058 -0.9081
-5 -19 -20 1.4675 -0.1580
-5 -19 -19 -5.3103 -1.8594
-5 -19 -18 -1.2127 -1.3312
-5 -19 -17 2.1031 1.4393
-5 -19 -16 -3.1168 -1.4317
-5 -19 -15 0.8983 2.1760
-5 -19 -14 2.9302 1.2113
-5 -19 -13 0.1429 -3.5367
-5 -19 -12 -0.4961 3.0337
-5 -19 -11 4.4237 -0.4486
-5 -19 -10 -1.6933 1.9356
-5 -19 -9 -0.6121 2.9478
-5 -19 -8 3.1487 0.5437
-5 -19 -7 -4.2880 -0.2347
-5 -19 -6 0.9253 -4.6796
-5 -19 -5 -5.1486 -4.5001
-5 -19 -4 -5.5895 -1.4236
-5 -19 -3 1.7520 1.7374
-5 -19 -2 3.4202 1.9786
-5 -19 -1 4.3474 5.8376
-5 -18 -24 -1.8113 0.5741
-5 -18 -23 -0.4704 0.9543
-5 -18 -22 -0.2430 0.7049
-5 -18 -21 0.8195 4.2363
-5 -18 -20 0.4797 0.1341
-5 -18 -19 -0.8170 0.3222
-5 -18 -18 -0.8606 3.7789
-5 -18 -17 -1.4041 -4.5944
-5 -18 -16 -0.5249 -2.3845
-5 -18 -15 -0.0839 -1.1635
-5 -18 -14 4.4580 -1.1161
-5 -18 -13 2.1655 -0.2247
-5 -18 -12 1.4176 0.1996
-5 -18 -11 0.6957 2.8100
-5 -18 -10 -2.9687 -3.2951
-5 -18 -9 0.1072 2.0887
-5 -18 -8 -4.9695 -0.1342
-5 -18 -7 -0.4615 1.0220
-5 -18 -6 1.1203 7.7033
-5 -18 -5 -1.8092 -1.3490
-5 -18 -4 2.9646 0.1427
-5 -18 -3 2.9924 -4.9702
-5 -18 -2 0.0897 -5.7105
-5 -18 -1 -1.2546 -2.6758
-5 -17 -25 2.1815 0.8783
-5 -17 -24 1.9269 -1.4017
-5 -17 -23 0.1225 1.4994
-5 -17 -22 0.9479 2.1333
-5 -17 -21 -0.4793 1.0414
-5 -17 -20 2.2609 0.9250
-5 -17 -19 -2.4290 -0.5955
-5 -17 -18 -3.2075 -2.9813
-5 -17 -17 1.2194 -0.5340
-5 -17 -16 -2.2748 -1.9395
-5 -17 -15 -0.9513 -2.2219
-5 -17 -14 -0.5026 2.8925
-5 -17 -13 0.0188 -1.3576
-5 -17 -12 -1.2133 1.2470
-5 -17 -11 3.2725 0.4096
-5 -17 -10 3.3691 -0.5937
-5 -17 -9 -0.8365 1.4001
-5 -17 -8 5.5193 1.2446
-5 -17 -7 -2.8341 3.2618
-5 -17 -6 -0.3042 -0.7459
-5 -17 -5 -0.9400 -2.7200
-5 -17 -4 -8.1259 -3.8448
-5 -17 -3 -1.4341 -1.3115
-5 -17 -2 -1.3598 -1.1096
-5 -17 -1 3.4833 2.3474
-5 -16 -26 0.2691 -2.9282
-5 -16 -25 1.3035 -1.8186
-5 -16 -24 -0.1122 1.3199
-5 -16 -23 0.6883 -0.2844
-5 -16 -22 -0.2365 -1.3445
-5 -16 -21 -1.0271 3.8665
-5 -16 -20 1.2124 0.8247
-5 -16 -19 -1.0751 -0.6050
-5 -16 -18 -0.6425 5.7026
-5 -16 -17 -1.9741 -1.8330
-5 -16 -16 -3.1399 -0.4253
-5 -16 -15 -1.5385 1.4020
-5 -16 -14 2.5304 -3.8761
-5 -16 -13 3.1625 0.1457
-5 -16 -12 1.9382 -2.6260
-5 -16 -11 2.4347 0.0914
-5 -16 -10 -2.8506 -1.5721
-5 -16 -9 1.6412 -0.1066
-5 -16 -8 -2.2425 1.8508
-5 -16 -7 -3.3835 -2.0847
-5 -16 -6 2.3956 7.0526
-5 -16 -5 -2.1786 2.1714
-5 -16 -4 -0.0350 2.2338
-5 -16 -3 2.9703 0.2069
-5 -16 -2 0.9057 -4.0572
-5 -16 -1 -0.6319 -3.5895
-5 -15 -27 -0.6620 0.1114
-5 -15 -26 1.5615 -2.5383
-5 -15 -25 0.7215 -0.0984
-5 -15 -24 2.4884 -0.9527
-5 -15 -23 1.4243 -0.8093
-5 -15 -22 -1.5396 1.3266
-5 -15 -21 0.3599 3.3929
-5 -15 -20 2.7773 1.0300
-5 -15 -19 -1.1627 2.0840
-5 -15 -18 -0.0838 1.2170
-5 -15 -17 2.2093 -2.5133
-5 -15 -16 -2.5270 -0.4631
-5 -15 -15 0.7105 -4.2957
-5 -15 -14 -2.4925 -0.8249
-5 -15 -13 -3.8413 1.8557
-5 -15 -12 -1.1148 1.1453
-5 -15 -11 -1.4018 0.8841
-5 -15 -10 4.0672 -1.8330
-5 -15 -9 0.1799 -1.5103
-5 -15 -8 6.4323 -1.2273
-5 -15 -7 2.9104 3.2608
-5 -15 -6 -2.8513 2.2479
-5 -15 -5 2.7732 1.8918
-5 -15 -4 -4.9405 -1.6207
-5 -15 -3 -3.1607 -3.9396
-5 -15 -2 -4.7397 -1.6143
-5 -15 -1 -0.2289 -4.0154
-5 -14 -28 -3.2416 1.0316
-5 -14 -27 0.0659 -0.1970
-5 -14 -26 -0.5719 -1.1017
-5 -14 -25 0.5141 -2.8971
-5 -14 -24 1.3569 1.1853
-5 -14 -23 2.5890 0.4096
-5 -14 -22 1.0010 -3.4827
-5 -14 -21 -2.1523 2.4962
-5 -14 -20 2.1428 0.5339
-5 -14 -19 -0.3285 -3.4896
-5 -14 -18 0.1250 5.3007
-5 -14 -17 0.5714 -0.5893
-5 -14 -16 -4.1594 -0.2091
-5 -14 -15 -2.3901 7.0380
-5 -14 -14 -0.4275 -3.6163
-5 -14 -13 0.6992 0.2871
-5 -14 -12 0.2737 -0.0647
-5 -14 -11 3.0687 -3.0237
-5 -14 -10 -1.4391 -1.1840
-5 -14 -9 0.8484 -3.1439
-5 -14 -8 2.5555 1.9721
-5 -14 -7 -3.2667 -3.6022
-5 -14 -6 0.5113 2.3940
-5 -14 -5 -2.0390 3.8493
-5 -14 -4 -1.8137 2.2611
-5 -14 -3 1.0149 4.9196
-5 -14 -2 0.2606 0.1629
-5 -14 -1 1.3409 1.9910
-5 -13 -28 -1.8060 -0.1222
-5 -13 -27 -3.2020 2.6103
-5 -13 -26 0.7545 -2.0336
-5 -13 -25 0.1004 -2.8287
-5 -13 -24 0.6800 -0.2699
-5 -13 -23 3.3459 -1.8572
-5 -13 -22 -1.8997 -2.2228
-5 -13 -21 -1.3572 3.0496
-5 -13 -20 2.6752 0.7363
-5 -13 -19 -2.3886 1.1048
-5 -13 -18 0.8285 5.9132
-5 -13 -17 5.6214 -2.0175
-5 -13 -16 -2.3385 0.2431
-5 -13 -15 2.8547 -0.8987
-5 -13 -14 1.3819 -4.4003
-5 -13 -13 -5.6946 2.6096
-5 -13 -12 -0.5151 2.0599
-5 -13 -11 -5.3726 1.1818
-5 -13 -10 -0.0901 -0.7919
-5 -13 -9 -1.1434 -3.3999
-5 -13 -8 1.8518 -3.5060
-5 -13 -7 9.1271 1.7620
-5 -13 -6 -1.8472 1.8419
-5 -13 -5 3.9577 5.3058
-5 -13 -4 0.6084 4.7807
-5 -13 -3 -1.6817 -5.8629
-5 -13 -2 -2.9309 -0.5662
-5 -13 -1 -4.9418 -6.2784
-5 -12 -29 2.4998 0.1422
-5 -12 -28 -1.9082 0.3539
-5 -12 -27 -1.5889 -0.2250
-5 -12 -26 -2.1195 1.3985
-5 -12 -25 -2.3858 -1.3113
-5 -12 -24 0.7358 0.0241
-5 -12 -23 2.4190 1.2144
-5 -12 -22 2.6391 -2.6833
-5 -12 -21 -0.6658 0.0449
-5 -12 -20 0.7011 0.6115
-5 -12 -19 0.3029 -4.8228
-5 -12 -18 -0.1018 2.3383
-5 -12 -17 2.7328 0.1462
-5 -12 -16 -0.8581 -3.4624
-5 -12 -15 0.1409 8.0904
-5 -12 -14 -1.4313 -0.3310
-5 -12 -13 -1.9878 -0.3959
-5 -12 -12 -2.2947 3.6524
-5 -12 -11 -0.7066 -2.2987
-5 -12 -10 0.7176 1.1973
-5 -12 -9 0.6118 -3.9970
-5 -12 -8 4.7313 0.1138
-5 -12 -7 2.2200 -2.9894
-5 -12 -6 0.4093 -3.7897
-5 -12 -5 -4.0917 1.6641
-5 -12 -4 -3.5677 -1.2482
-5 -12 -3 -2.0771 6.8509
-5 -12 -2 -4.1750 1.9745
-5 -12 -1 3.2038 8.1005
-5 -11 -29 1.1261 0.8986
-5 -11 -28 2.5758 -0.4644
-5 -11 -27 -2.3364 3.2727
-5 -11 -26 -0.3819 1.7380
-5 -11 -25 -0.4400 -2.7108
-5 -11 -24 -1.6091 0.3953
-5 -11 -23 2.6340 -1.5336
-5 -11 -22 -1.1377 -4.2517
-5 -11 -21 -1.6439 0.0200
-5 -11 -20 2.4969 -0.1762
-5 -11 -19 -2.9378 -1.0861
-5 -11 -18 -1.8023 5.8506
-5 -11 -17 5.7356 -0.1349
-5 -11 -16 -1.9143 -0.6336
-5 -11 -15 2.5126 3.0763
-5 -11 -14 6.5204 -5.0405
-5 -11 -13 -3.8229 1.8875
-5 -11 -12 2.6670 2.5436
-5 -11 -11 -4.6435 -0.4230
-5 -11 -10 -4.8155 2.6164
-5 -11 -9 -0.5550 -3.3606
-5 -11 -8 -7.4940 -6.1553
-5 -11 -7 7.1434 1.3960
-5 -11 -6 2.1335 -0.1379
-5 -11 -5 2.2905 3.7956
-5 -11 -4 5.2193 13.1805
-5 -11 -3 -0.1997 -2.4374
-5 -11 -2 4.2225 -0.8173
-5 -11 -1 -4.6436 -0.9331
-5 -10 -30 -0.1509 -2.1832
-5 -10 -29 3.5163 -0.0747
-5 -10 -28 1.7082 -0.9711
-5 -10 -27 -0.4991 -1.6892
-5 -10 -26 -0.3097 1.8440
-5 -10 -25 -4.5630 0.4175
-5 -10 -24 -1.5975 1.5729
-5 -10 -23 0.5786 1.2234
-5 -10 -22 0.6767 -0.5104
-5 -10 -21 3.0720 -0.6688
-5 -10 -20 -0.4191 -1.3527
-5 -10 -19 -1.2406 -3.2735
-5 -10 -18 -0.5492 -0.1775
-5 -10 -17 1.4830 0.6609
-5 -10 -16 1.0755 -5.2209
-5 -10 -15 4.8187 3.7342
-5 -10 -14 1.0960 2.0411
-5 -10 -13 -3.4610 -0.9962
-5 -10 -12 -0.8692 5.2874
-5 -10 -11 -6.4420 -1.9705
-5 -10 -10 -1.9132 3.4690
-5 -10 -9 2.8552 0.0646
-5 -10 -8 2.2599 -2.3011
-5 -10 -7 6.8760 0.7953
-5 -10 -6 6.8512 -5.7937
-5 -10 -5 -2.6086 -1.7259
-5 -10 -4 -4.1989 -6.7281
-5 -10 -3 -3.2501 2.4890
-5 -10 -2 -9.7856 1.2462
-5 -10 -1 0.1738 3.5891
-5 -9 -30 -2.1706 -1.9141
-5 -9 -29 -1.4317 1.6079
-5 -9 -28 4.3721 -1.1632
-5 -9 -27 -0.4543 -0.3995
-5 -9 -26 0.4980 3.9178
-5 -9 -25 1.3555 -0.7086
-5 -9 -24 -2.9855 1.9424
-5 -9 -23 1.1397 0.4148
-5 -9 -22 -2.3690 -2.9225
-5 -9 -21 -2.5003 -1.1063
-5 -9 -20 3.2541 -1.3954
-5 -9 -19 -1.1103 -2.9043
-5 -9 -18 -3.1924 1.7956
-5 -9 -17 2.8109 1.0998
-5 -9 -16 -2.0309 -1.9165
-5 -9 -15 -0.8357 5.4965
-5 -9 -14 8.6879 -3.1958
-5 -9 -13 -1.2229 0.2339
-5 -9 -12 4.6904 3.7518
-5 -9 -11 2.1695 -4.8661
-5 -9 -10 -8.7566 4.5670
-5 -9 -9 2.4420 0.5017
-5 -9 -8 -10.0221 -8.5459
-5 -9 -7 -3.6936 0.6435
-5 -9 -6 5.3586 -1.5058
-5 -9 -5 -1.5602 -3.4493
-5 -9 -4 6.0321 13.2231
-5 -9 -3 -0.1102 7.0130
-5 -9 -2 6.7228 -0.5054
-5 -9 -1 2.2532 7.9088
-5 -8 -31 -0.0102 1.1674
-5 -8 -30 -1.5338 -1.2704
-5 -8 -29 0.0500 1.2449
-5 -8 -28 3.7112 -0.1308
-5 -8 -27 0.3307 -3.4597
-5 -8 -26 2.5198 0.7019
-5 -8 -25 -2.5704 -1.2243
-5 -8 -24 -3.8333 2.7009
-5 -8 -23 0.6193 3.4992
-5 -8 -22 -2.1969 0.7193
-5 -8 -21 4.2647 1.7351
-5 -8 -20 1.1861 -3.2021
-5 -8 -19 -3.4347 -2.2272
-5 -8 -18 -2.2606 -0.8479
-5 -8 -17 -0.5192 -0.3088
-5 -8 -16 -0.0383 -3.4523
-5 -8 -15 5.6131 -1.7146
-5 -8 -14 6.5490 1.7329
-5 -8 -13 -3.5647 -1.5367
-5 -8 -12 2.7927 5.5580
-5 -8 -11 -6.4503 0.0214
-5 -8 -10 -9.6781 1.4637
-5 -8 -9 3.9613 5.1678
-5 -8 -8 -1.9953 -3.8587
-5 -8 -7 3.6919 2.9025
-5 -8 -6 11.9512 -1.5592
-5 -8 -5 3.3836 -1.8718
-5 -8 -4 0.1693 -6.7242
-5 -8 -3 -0.9020 -6.4142
-5 -8 -2 -8.1554 0.1841
-5 -8 -1 -4.5228 -7.4853
-5 -7 -31 0.7942 0.8687
-5 -7 -30 -1.4002 -2.8628
-5 -7 -29 -3.3104 1.0991
-5 -7 -28 2.4348 1.6443
-5 -7 -27 0.0487 -3.3464
-5 -7 -26 -0.0639 2.5778
-5 -7 -25 5.0092 0.0845
-5 -7 -24 -1.2228 0.8719
-5 -7 -23 0.3369 1.2888
-5 -7 -22 -2.5275 -0.7016
-5 -7 -21 -5.1364 0.9542
-5 -7 -20 1.9832 0.5902
-5 -7 -19 0.9373 -1.7101
-5 -7 -18 -1.0397 -3.7559
-5 -7 -17 0.0947 0.2322
-5 -7 -16 -2.1502 -3.4992
-5 -7 -15 -4.5529 3.8533
-5 -7 -14 5.1684 1.3348
-5 -7 -13 2.0754 -1.0605
-5 -7 -12 3.4096 6.1230
-5 -7 -11 10.8503 -6.5823
-5 -7 -10 -7.1504 1.9530
-5 -7 -9 0.5829 4.8499
-5 -7 -8 -3.0947 -7.1459
-5 -7 -7 -13.1294 0.1133
-5 -7 -6 4.4475 -1.8946
-5 -7 -5 -4.4579 -8.4129
-5 -7 -4 1.4159 0.7385
-5 -7 -3 2.4348 9.0311
-5 -7 -2 0.6845 1.9716
-5 -7 -1 6.8850 8.6216
-5 -6 -31 -0.5737 -0.3088
-5 -6 -30 0.3866 -0.7643
-5 -6 -29 -1.7877 1.3744
-5 -6 -28 3.4355 2.0973
-5 -6 -27 1.2076 -2.5918
-5 -6 -26 2.6419 -0.7027
-5 -6 -25 0.5722 -2.9648
-5 -6 -24 -5.9926 -0.0735
-5 -6 -23 0.2661 4.9694
-5 -6 -22 -1.7050 1.3891
-5 -6 -21 3.1303 4.4046
-5 -6 -20 4.1605 -2.2231
-5 -6 -19 -2.4704 -1.6513
-5 -6 -18 -4.1350 1.5633
-5 -6 -17 -3.7498 -3.0389
-5 -6 -16 -1.4199 0.1719
-5 -6 -15 1.4035 -3.6095
-5 -6 -14 9.2437 -2.8501
-5 -6 -13 0.2648 -2.7668
-5 -6 -12 5.2913 1.7847
-5 -6 -11 0.9821 4.1469
-5 -6 -10 -14.0253 0.8055
-5 -6 -9 1.0317 6.8533
-5 -6 -8 -5.5299 -2.4828
-5 -6 -7 -4.9122 1.3372
-5 -6 -6 9.1945 3.0550
-5 -6 -5 4.2163 -0.0808
-5 -6 -4 7.0279 1.7108
-5 -6 -3 2.8044 -11.7332
-5 -6 -2 -1.7711 -1.9512
-5 -6 -1 -2.8734 -10.4726
-5 -5 -32 0.1104 -2.7159
-5 -5 -31 1.4964 -1.8198
-5 -5 -30 -0.1250 -2.3225
-5 -5 -29 -1.5827 -2.3463
-5 -5 -28 -1.1082 2.4269
-5 -5 -27 -0.4303 -1.1717
-5 -5 -26 -1.2774 1.9673
-5 -5 -25 4.8988 1.5827
-5 -5 -24 3.4263 -0.6646
-5 -5 -23 0.8048 -0.2102
-5 -5 -22 -1.7202 -1.6137
-5 -5 -21 -5.3168 1.5917
-5 -5 -20 -0.3614 2.8706
-5 -5 -19 -0.2177 3.5823
-5 -5 -18 3.0124 -4.3573
-5 -5 -17 1.0386 -3.0203
-5 -5 -16 -3.5975 -3.2127
-5 -5 -15 -5.1154 -2.1059
-5 -5 -14 -3.0408 2.6313
-5 -5 -13 1.5370 -0.6383
-5 -5 -12 1.4151 6.1227
-5 -5 -11 13.9553 -2.8044
-5 -5 -10 2.7602 0.1866
-5 -5 -9 -2.7384 6.1738
-5 -5 -8 4.8010 -3.4554
-5 -5 -7 -12.7082 2.6500
-5 -5 -6 0.7191 -2.0656
-5 -5 -5 -4.3135 -6.1572
-5 -5 -4 -8.1315 -8.0157
-5 -5 -3 6.0436 -3.0033
-5 -5 -2 -5.4261 3.4200
-5 -5 -1 3.6445 -0.9157
-5 -4 -32 -1.6911 1.7169
-5 -4 -31 -2.8990 -1.2991
-5 -4 -30 -1.4415 -0.3821
-5 -4 -29 -1.1968 1.0957
-5 -4 -28 2.4332 1.3407
-5 -4 -27 2.5459 0.2848
-5 -4 -26 2.8052 -1.5775
-5 -4 -25 4.4340 -3.2481
-5 -4 -24 -5.6175 -1.6576
-5 -4 -23 -3.2139 3.1560
-5 -4 -22 -1.0071 0.4654
-5 -4 -21 -0.1019 4.7547
-5 -4 -20 5.4033 -0.8090
-5 -4 -19 0.9591 -3.1080
-5 -4 -18 -2.0777 7.2869
-5 -4 -17 -5.2842 -3.1852
-5 -4 -16 -3.4419 1.9925
-5 -4 -15 -2.8478 2.4168
-5 -4 -14 4.3432 -8.2409
-5 -4 -13 3.2904 -4.9847
-5 -4 -12 5.9280 -4.2596
-5 -4 -11 10.4801 2.0897
-5 -4 -10 -7.6152 2.7961
-5 -4 -9 -1.0667 5.7902
-5 -4 -8 -5.6239 -0.1693
-5 -4 -7 -13.5202 -0.5804
-5 -4 -6 2.4804 5.5960
-5 -4 -5 -2.6867 -0.6213
-5 -4 -4 6.6972 12.1997
-5 -4 -3 7.6336 -5.6383
-5 -4 -2 0.5863 -6.1859
-5 -4 -1 2.1404 -1.6928
-5 -3 -32 -0.5111 3.1562
-5 -3 -31 2.0152 -3.5387
-5 -3 -30 -0.4974 -1.6840
-5 -3 -29 1.3013 -3.5044
-5 -3 -28 -2.9548 -2.0135
-5 -3 -27 -3.3684 -0.2570
-5 -3 -26 -0.1734 1.6530
-5 -3 -25 1.3288 3.1736
-5 -3 -24 5.6598 0.2456
-5 -3 -23 4.1721 0.7888
-5 -3 -22 -2.1418 -2.4479
-5 -3 -21 -4.4203 -0.0744
-5 -3 -20 -0.1241 1.9703
-5 -3 -19 -2.9792 5.2258
-5 -3 -18 4.5729 1.9246
-5 -3 -17 7.3203 -5.5339
-5 -3 -16 -4.8597 -2.1244
-5 -3 -15 -3.0883 -4.0136
-5 -3 -14 -7.5819 -1.6233
-5 -3 -13 -5.1622 -0.1939
-5 -3 -12 -0.9290 2.6465
-5 -3 -11 7.3045 -0.5252
-5 -3 -10 10.4962 0.4566
-5 -3 -9 -1.5974 6.3625
-5 -3 -8 8.5049 -0.8535
-5 -3 -7 -2.9676 6.4518
-5 -3 -6 -0.8893 0.9534
-5 -3 -5 1.9925 -3.3059
-5 -3 -4 -15.2732 -2.1038
-5 -3 -3 4.2045 -13.8952
-5 -3 -2 -6.2683 -0.1577
-5 -3 -1 -4.4185 -6.9577
-5 -2 -32 -0.6410 1.7360
-5 -2 -31 -1.3120 -0.4528
-5 -2 -30 -4.1615 -0.2065
-5 -2 -29 -1.7563 2.7223
-5 -2 -28 0.2574 -0.6007
-5 -2 -27 1.5601 1.3124
-5 -2 -26 1.3699 -1.1454
-5 -2 -25 6.8117 -4.3863
-5 -2 -24 1.3839 -0.4758
-5 -2 -23 -4.1498 2.3537
-5 -2 -22 -0.2633 -0.9987
-5 -2 -21 -3.6706 2.7350
-5 -2 -20 1.6722 -0.2694
-5 -2 -19 1.9276 -8.4370
-5 -2 -18 0.4205 8.4697
-5 -2 -17 -1.5945 2.2952
-5 -2 -16 -4.0570 0.8836
-5 -2 -15 -3.1435 11.9721
-5 -2 -14 -2.1828 -7.1988
-5 -2 -13 0.5404 -6.8888
-5 -2 -12 1.3307 -5.1001
-5 -2 -11 11.9194 -4.9644
-5 -2 -10 4.7892 2.2253
-5 -2 -9 1.0193 3.4448
-5 -2 -8 2.0326 0.1720
-5 -2 -7 -14.0438 -3.8402
-5 -2 -6 -3.9408 5.4663
-5 -2 -5 -7.1113 -3.1894
-5 -2 -4 -4.9089 13.0362
-5 -2 -3 9.3124 10.6813
-5 -2 -2 0.9857 -7.1191
-5 -2 -1 3.6652 10.1741
-5 -1 -32 -0.4292 7.1029
-5 -1 -31 2.5848 -1.3869
-5 -1 -30 -0.4813 -1.7691
-5 -1 -29 2.4913 -0.9985
-5 -1 -28 -1.4843 -4.3819
-5 -1 -27 -7.2281 -0.9010
-5 -1 -26 0.4556 -0.6340
-5 -1 -25 -0.9106 1.4733
-5 -1 -24 2.6601 0.0998
-5 -1 -23 8.1609 1.6570
-5 -1 -22 -1.2866 0.1289
-5 -1 -21 -5.2635 -0.2975
-5 -1 -20 0.4194 1.5747
-5 -1 -19 -3.9675 1.3935
-5 -1 -18 2.0326 7.3920
-5 -1 -17 13.6847 -3.0649
-5 -1 -16 -2.4236 -3.7485
-5 -1 -15 -1.4309 -0.6740
-5 -1 -14 -3.7593 -4.4965
-5 -1 -13 -10.9317 -0.2381
-5 -1 -12 -1.1460 0.1633
-5 -1 -11 -2.4101 -1.1481
-5 -1 -10 5.7961 -1.8551
-5 -1 -9 0.3364 3.4587
-5 -1 -8 4.5243 0.0509
-5 -1 -7 7.2354 4.6645
-5 -1 -6 -0.2458 7.7140
-5 -1 -5 11.3522 -1.8118
-5 -1 -4 -8.3225 7.4799
-5 -1 -3 -1.0860 -8.5795
-5 -1 -2 -2.7389 -6.7793
-5 -1 -1 -11.4290 -3.0594
-4 -29 -4 2.4922 -1.9131
-4 -29 -3 1.6265 -0.7627
-4 -29 -2 0.6614 2.8960
-4 -29 -1 1.6092 -0.7478
-4 -28 -9 2.1888 -2.6513
-4 -28 -8 2.8201 1.3015
-4 -28 -7 2.2226 -1.0456
-4 -28 -6 -0.6734 -0.8129
-4 -28 -5 -2.1304 1.9126
-4 -28 -4 0.7643 -0.4772
-4 -28 -3 -1.6215 1.8978
-4 -28 -2 0.5109 0.8916
-4 -28 -1 0.0012 -0.6046
-4 -27 -13 -0.3611 -1.9148
-4 -27 -12 -0.8568 -2.8187
-4 -27 -11 -1.6412 -1.6789
-4 -27 -10 -1.5160 -3.3314
-4 -27 -9 2.8993 -0.4452
-4 -27 -8 1.1107 -1.3204
-4 -27 -7 2.4227 2.6696
-4 -27 -6 0.4359 2.9770
-4 -27 -5 -2.6864 1.8288
-4 -27 -4 -1.1107 1.4279
-4 -27 -3 1.3962 -1.5780
-4 -27 -2 0.7802 1.5287
-4 -27 -1 2.9018 0.4722
-4 -26 -15 -0.1651 -0.9066
-4 -26 -14 -4.7350 -1.0092
-4 -26 -13 -0.9262 0.1282
-4 -26 -12 -2.0909 -1.7709
-4 -26 -11 -0.6468 -0.2980
-4 -26 -10 -1.2717 2.1126
-4 -26 -9 0.9091 -0.8787
-4 -26 -8 2.9359 -0.1529
-4 -26 -7 3.0702 -1.7134
-4 -26 -6 3.8892 -1.7525
-4 -26 -5 -0.8015 1.6766
-4 -26 -4 1.2271 -0.9967
-4 -26 -3 -1.2073 1.4865
-4 -26 -2 -1.3361 1.7052
-4 -26 -1 2.0044 -0.1711
-4 -25 -17 -1.8756 0.1244
-4 -25 -16 -0.8426 4.0806
-4 -25 -15 0.4867 3.0096
-4 -25 -14 2.5215 2.2152
-4 -25 -13 0.0793 1.3201
-4 -25 -12 -0.4288 -1.0451
-4 -25 -11 0.6353 -0.8481
-4 -25 -10 -3.9059 -4.7122
-4 -25 -9 -1.5743 -1.5889
-4 -25 -8 1.8426 -4.0582
-4 -25 -7 1.2021 -1.6050
-4 -25 -6 2.6570 0.9044
-4 -25 -5 1.8802 1.7011
-4 -25 -4 -3.3400 3.2564
-4 -25 -3 -0.6108 -0.6550
-4 -25 -2 -0.1740 2.9876
-4 -25 -1 1.1332 1.5264
-4 -24 -19 -1.0260 0.9175
-4 -24 -18 2.2374 0.8547
-4 -24 -17 4.9423 -3.6217
-4 -24 -16 0.0449 0.0195
-4 -24 -15 2.6543 2.9312
-4 -24 -14 -2.1451 -1.1237
-4 -24 -13 -2.2424 0.8328
-4 -24 -12 -2.2780 -0.6167
-4 -24 -11 -2.2437 -2.6678
-4 -24 -10 -2.3091 0.7896
-4 -24 -9 -2.7049 1.5298
-4 -24 -8 0.1834 0.9463
-4 -24 -7 0.9087 -2.0880
-4 -24 -6 4.4306 -2.6736
-4 -24 -5 0.6814 0.1846
-4 -24 -4 3.9132 -0.8905
-4 -24 -3 2.1277 1.0251
-4 -24 -2 -1.9813 0.0663
-4 -24 -1 4.1856 0.1989
-4 -23 -20 0.0703 0.5601
-4 -23 -19 0.5712 -4.6626
-4 -23 -18 -1.5708 -1.5220
-4 -23 -17 -2.0055 -0.0206
-4 -23 -16 -1.7081 0.0702
-4 -23 -15 -0.2920 3.5460
-4 -23 -14 2.3738 1.6306
-4 -23 -13 0.1397 2.8631
-4 -23 -12 -1.0172 1.6712
-4 -23 -11 2.5973 3.0181
-4 -23 -10 -0.3454 -1.7687
-4 -23 -9 -4.8354 -1.4330
-4 -23 -8 -0.7525 -2.3730
-4 -23 -7 -0.7534 -3.4976
-4 -23 -6 0.2245 -2.8277
-4 -23 -5 6.2167 -2.3147
-4 -23 -4 -1.3671 1.8167
-4 -23 -3 -1.9337 -2.6973
-4 -23 -2 -0.4747 2.8986
-4 -23 -1 -4.4025 5.0249
-4 -22 -22 1.8001 -0.7069
-4 -22 -21 -1.9707 2.4838
-4 -22 -20 -1.1803 1.3029
-4 -22 -19 -0.8006 1.2904
-4 -22 -18 -1.6698 2.8706
-4 -22 -17 5.5842 -3.5776
-4 -22 -16 0.6938 -5.1360
-4 -22 -15 2.5653 3.7881
-4 -22 -14 2.5779 1.2540
-4 -22 -13 -0.7308 0.7808
-4 -22 -12 0.1843 1.8223
-4 -22 -11 -2.4016 -3.1824
-4 -22 -10 -0.9921 -1.0899
-4 -22 -9 -3.0852 1.3287
-4 -22 -8 -2.5398 1.8664
-4 -22 -7 -3.0068 0.3910
-4 -22 -6 0.4346 -1.8609
-4 -22 -5 -0.9083 -1.8996
-4 -22 -4 1.8228 -1.2080
-4 -22 -3 6.1462 2.7553
-4 -22 -2 -0.4628 -2.0450
-4 -22 -1 5.0522 -1.7567
-4 -21 -23 -0.8325 -0.5787
-4 -21 -22 -1.8433 3.9860
-4 -21 -21 2.9321 -1.0520
-4 -21 -20 2.5444 0.5106
-4 -21 -19 -0.1534 -3.0186
-4 -21 -18 -1.0395 -3.9930
-4 -21 -17 -1.7006 0.6783
-4 -21 -16 -0.9262 -2.2062
-4 -21 -15 -1.1678 0.7382
-4 -21 -14 1.1460 -0.2784
-4 -21 -13 0.5789 1.6633
-4 -21 -12 -1.0655 1.1881
-4 -21 -11 1.5533 3.6125
-4 -21 -10 2.9642 3.0458
-4 -21 -9 -1.6211 0.2638
-4 -21 -8 -3.0098 1.9057
-4 -21 -7 -2.2373 -0.5655
-4 -21 -6 -3.1039 -1.7429
-4 -21 -5 5.0308 -5.0943
-4 -21 -4 1.8750 -1.7914
-4 -21 -3 -1.7316 -3.5250
-4 -21 -2 1.7968 -2.6417
-4 -21 -1 -8.6010 5.0353
-4 -20 -24 0.2890 -2.0789
-4 -20 -23 -0.4768 -0.1674
-4 -20 -22 0.9030 -3.7201
-4 -20 -21 -1.6459 0.9595
-4 -20 -20 -2.6361 3.6281
-4 -20 -19 0.2190 1.7949
-4 -20 -18 -3.7436 3.5244
-4 -20 -17 1.8395 0.4820
-4 -20 -16 0.8453 -7.2689
-4 -20 -15 0.3688 -0.8297
-4 -20 -14 4.4545 2.8737
-4 -20 -13 0.6729 -0.5160
-4 -20 -12 3.0322 3.5266
-4 -20 -11 -0.8115 -0.6321
-4 -20 -10 1.2125 -2.0540
-4 -20 -9 0.8243 1.0581
-4 -20 -8 -1.8416 -0.6600
-4 -20 -7 -3.3333 1.3875
-4 -20 -6 -4.3508 1.8969
-4 -20 -5 -2.4880 -1.8004
-4 -20 -4 -2.9926 -2.7551
-4 -20 -3 3.6267 4.8606
-4 -20 -2 2.3981 -0.3634
-4 -20 -1 1.6493 -4.6364
-4 -19 -25 0.7727 -0.4849
-4 -19 -24 -0.5940 0.0304
-4 -19 -23 0.1731 -1.1950
-4 -19 -22 -1.3978 4.5907
-4 -19 -21 0.6341 1.6114
-4 -19 -20 4.1265 0.1194
-4 -19 -19 0.1248 -0.1691
-4 -19 -18 -0.6237 -3.8175
-4 -19 -17 -0.9949 -0.0754
-4 -19 -16 0.0660 -1.9532
-4 -19 -15 -1.0325 -1.0977
-4 -19 -14 -1.2107 -2.2322
-4 -19 -13 0.1896 -0.3205
-4 -19 -12 -0.5467 -0.9025
-4 -19 -11 0.8250 -1.6839
-4 -19 -10 2.1536 4.3923
-4 -19 -9 2.3202 1.2762
-4 -19 -8 -0.5585 4.3368
-4 -19 -7 -2.1041 4.3104
-4 -19 -6 -3.8967 1.5078
-4 -19 -5 0.6447 -2.0588
-4 -19 -4 2.8284 -4.1046
-4 -19 -3 -1.7730 -2.4775
-4 -19 -2 4.2634 -5.3703
-4 -19 -1 -5.0710 0.6028
-4 -18 -26 -0.7618 0.5433
-4 -18 -25 0.4898 2.4805
-4 -18 -24 2.0200 -1.7851
-4 -18 -23 0.9425 -0.9214
-4 -18 -22 1.3504 -4.1989
-4 -18 -21 -1.2345 -2.5023
-4 -18 -20 -3.3222 3.7300
-4 -18 -19 1.0976 2.2566
-4 -18 -18 -3.5377 1.8834
-4 -18 -17 -2.0935 3.9397
-4 -18 -16 -0.1566 -2.5584
-4 -18 -15 -2.5012 -4.7037
-4 -18 -14 2.9227 2.0134
-4 -18 -13 -0.8953 -1.7871
-4 -18 -12 2.8718 0.9695
-4 -18 -11 1.2354 3.0634
-4 -18 -10 1.4759 -2.4200
-4 -18 -9 6.1424 1.0733
-4 -18 -8 0.3570 -1.2288
-4 -18 -7 -0.2602 -2.1433
-4 -18 -6 -4.0059 3.2098
-4 -18 -5 -4.3426 2.3079
-4 -18 -4 -4.2033 -3.3141
-4 -18 -3 -1.8897 3.0859
-4 -18 -2 2.3846 4.0389
-4 -18 -1 -0.3401 -4.5055
-4 -17 -27 0.3634 0.7487
-4 -17 -26 1.0864 0.1890
-4 -17 -25 -0.4014 -2.2211
-4 -17 -24 -1.6784 -0.5335
-4 -17 -23 1.1032 -0.2349
-4 -17 -22 1.4065 2.7946
-4 -17 -21 -1.6057 2.3850
-4 -17 -20 2.6565 1.6456
-4 -17 -19 0.4332 1.9448
-4 -17 -18 -1.1366 -1.0357
-4 -17 -17 1.1760 0.5521
-4 -17 -16 0.9695 -1.3786
-4 -17 -15 0.6480 0.3083
-4 -17 -14 -1.5006 -1.1196
-4 -17 -13 -1.8721 -1.8539
-4 -17 -12 -2.0898 -0.4830
-4 -17 -11 -0.4071 -8.3412
-4 -17 -10 0.1489 -0.0578
-4 -17 -9 2.2611 1.4735
-4 -17 -8 3.2724 1.5987
-4 -17 -7 1.4879 7.8790
-4 -17 -6 -1.2550 4.1026
-4 -17 -5 -3.3569 1.6233
-4 -17 -4 1.4084 -1.0257
-4 -17 -3 -2.1539 -1.6926
-4 -17 -2 1.7406 -5.7421
-4 -17 -1 3.2458 -2.8453
-4 -16 -28 1.2784 -1.5627
-4 -16 -27 -1.3982 1.7200
-4 -16 -26 -1.9872 0.5990
-4 -16 -25 0.5396 1.8898
-4 -16 -24 2.6271 -0.0297
-4 -16 -23 1.0783 -1.5513
-4 -16 -22 2.8151 -2.3771
-4 -16 -21 1.1663 -3.5703
-4 -16 -20 -3.1165 1.4804
-4 -16 -19 2.6002 1.6363
-4 -16 -18 -1.0168 -0.3255
-4 -16 -17 -3.1614 2.7142
-4 -16 -16 0.6941 2.4217
-4 -16 -15 -3.9859 -2.5029
-4 -16 -14 0.7448 0.6300
-4 -16 -13 -3.8592 -0.1762
-4 -16 -12 -2.3657 -2.0477
-4 -16 -11 2.3685 3.7114
-4 -16 -10 -0.8977 -1.4857
-4 -16 -9 8.4729 -1.6080
-4 -16 -8 3.9394 0.8046
-4 -16 -7 0.7944 -3.3311
-4 -16 -6 1.1208 -1.1892
-4 -16 -5 -3.8714 4.6396
-4 -16 -4 -4.1031 0.5495
-4 -16 -3 -4.3611 -1.2680
-4 -16 -2 -0.9683 4.9040
-4 -16 -1 -2.4888 -0.9483
-4 -15 -29 0.2005 0.9780
-4 -15 -28 0.3252 0.0590
-4 -15 -27 -1.1036 -1.2354
-4 -15 -26 0.3470 -0.3101
-4 -15 -25 -0.5067 -1.9855
-4 -15 -24 -3.1183 -1.7832
-4 -15 -23 0.4002 0.1922
-4 -15 -22 4.7291 1.3110
-4 -15 -21 -0.8550 -0.4699
-4 -15 -20 0.0319 1.2195
-4 -15 -19 0.3986 2.6274
-4 -15 -18 -4.0432 -0.0714
-4 -15 -17 2.2802 2.2550
-4 -15 -16 2.2969 -0.9304
-4 -15 -15 1.3417 1.9442
-4 -15 -14 3.6289 4.1080
-4 -15 -13 -0.7724 -1.8321
-4 -15 -12 -4.4501 3.0830
-4 -15 -11 -2.8693 -8.4248
-4 -15 -10 -3.4515 -8.0333
-4 -15 -9 -1.0265 0.6374
-4 -15 -8 4.3832 -3.1912
-4 -15 -7 3.9887 6.1068
-4 -15 -6 4.4455 6.3160
-4 -15 -5 -2.9324 2.8341
-4 -15 -4 -2.7748 3.2554
-4 -15 -3 -0.5649 2.2247
-4 -15 -2 -3.9356 -3.6396
-4 -15 -1 4.1235 -6.0358
-4 -14 -29 0.2832 -0.2356
-4 -14 -28 0.0592 -2.5994
-4 -14 -27 -1.6326 0.4131
-4 -14 -26 -2.2554 1.5199
-4 -14 -25 -0.1518 0.2341
-4 -14 -24 1.7969 0.5327
-4 -14 -23 0.1386 -1.2361
-4 -14 -22 1.3455 -0.9534
-4 -14 -21 3.4590 -0.9968
-4 -14 -20 -2.0252 0.1206
-4 -14 -19 1.7899 -0.5157
-4 -14 -18 2.2558 -1.3641
-4 -14 -17 -1.8129 -0.2351
-4 -14 -16 3.6986 0.9548
-4 -14 -15 -1.9075 1.2209
-4 -14 -14 0.6106 0.6885
-4 -14 -13 -2.8049 1.3460
-4 -14 -12 -8.8611 -0.5779
-4 -14 -11 0.5583 2.3848
-4 -14 -10 -3.6680 -0.1923
-4 -14 -9 4.7888 -3.3622
-4 -14 -8 7.6105 0.6843
-4 -14 -7 1.3877 0.1955
-4 -14 -6 4.2797 -2.3829
-4 -14 -5 -0.7998 -0.1364
-4 -14 -4 -1.0676 3.2657
-4 -14 -3 -4.0267 -1.9856
-4 -14 -2 -2.6110 0.3483
-4 -14 -1 -5.1452 2.0158
-4 -13 -30 0.1505 1.6013
-4 -13 -29 -1.0138 2.8577
-4 -13 -28 1.5468 2.2751
-4 -13 -27 0.3384 -1.4044
-4 -13 -26 -1.9077 -1.1928
-4 -13 -25 -0.1931 -1.3471
-4 -13 -24 -2.8128 -2.2773
-4 -13 -23 -2.1681 0.1844
-4 -13 -22 5.2826 0.9334
-4 -13 -21 1.6367 -1.8619
-4 -13 -20 -0.8830 -1.0977
-4 -13 -19 1.4843 1.3197
-4 -13 -18 -6.4871 -1.8253
-4 -13 -17 -0.9224 1.6668
-4 -13 -16 3.4405 -0.4908
-4 -13 -15 -1.6056 0.1383
-4 -13 -14 6.7856 8.3374
-4 -13 -13 6.3844 -0.5993
-4 -13 -12 -3.6702 5.7158
-4 -13 -11 -2.3510 0.1581
-4 -13 -10 -5.0472 -11.5037
-4 -13 -9 -7.0072 -2.1194
-4 -13 -8 4.5342 -6.7792
-4 -13 -7 2.2508 0.5596
-4 -13 -6 5.0925 5.3744
-4 -13 -5 4.5907 2.5832
-4 -13 -4 -7.8547 5.1405
-4 -13 -3 -0.2837 3.2264
-4 -13 -2 -3.1572 4.8275
-4 -13 -1 -5.1335 -4.2223
-4 -12 -31 0.6925 -0.0405
-4 -12 -30 1.2060 -0.7338
-4 -12 -29 0.6629 1.6663
-4 -12 -28 0.1596 0.3844
-4 -12 -27 -0.9714 -1.0205
-4 -12 -26 -2.5990 1.2702
-4 -12 -25 0.0071 -0.2898
-4 -12 -24 -0.2943 -1.3047
-4 -12 -23 -1.0290 -0.0462
-4 -12 -22 -0.4982 -0.9078
-4 -12 -21 2.2402 1.8595
-4 -12 -20 -0.0745 2.6129
-4 -12 -19 -1.1258 -2.4928
-4 -12 -18 2.6376 -2.0361
-4 -12 -17 -0.2184 -1.1969
-4 -12 -16 5.0798 -3.5380
-4 -12 -15 1.6187 1.0872
-4 -12 -14 0.8426 2.4244
-4 -12 -13 2.6105 0.9925
-4 -12 -12 -8.9896 1.3595
-4 -12 -11 -2.2900 1.6082
-4 -12 -10 -5.4034 -1.6839
-4 -12 -9 -2.5426 -2.6728
-4 -12 -8 6.7819 -0.2016
-4 -12 -7 2.4052 1.7197
-4 -12 -6 6.5926 5.8865
-4 -12 -5 -0.3736 -2.1245
-4 -12 -4 3.0064 -1.4955
-4 -12 -3 1.6370 0.0214
-4 -12 -2 -2.8712 -5.6971
-4 -12 -1 1.1835 1.1647
-4 -11 -31 0.4896 -3.4565
-4 -11 -30 1.5046 -0.1518
-4 -11 -29 -1.2692 1.3524
-4 -11 -28 0.1559 4.1040
-4 -11 -27 3.2739 0.3355
-4 -11 -26 -2.8083 -1.2862
-4 -11 -25 -1.0838 1.1936
-4 -11 -24 -0.1460 -2.4952
-4 -11 -23 -4.0546 -0.1036
-4 -11 -22 2.8043 1.2254
-4 -11 -21 2.5255 -1.2486
-4 -11 -20 -0.6118 -1.3581
-4 -11 -19 3.0252 -0.2689
-4 -11 -18 -4.6840 -3.7840
-4 -11 -17 -5.3145 -1.3525
-4 -11 -16 3.0444 0.9432
-4 -11 -15 -3.3889 -2.8355
-4 -11 -14 1.3412 7.2371
-4 -11 -13 10.6818 0.3559
-4 -11 -12 0.0256 3.0175
-4 -11 -11 -0.1445 9.4858
-4 -11 -10 0.2244 -6.5258
-4 -11 -9 -11.3262 -1.9513
-4 -11 -8 3.7297 -8.1568
-4 -11 -7 2.9137 -6.4921
-4 -11 -6 -2.9660 2.5997
-4 -11 -5 12.2583 -2.0064
-4 -11 -4 -6.7208 6.2389
-4 -11 -3 -6.3519 -0.7186
-4 -11 -2 3.9060 6.6747
-4 -11 -1 -11.3942 6.0172
-4 -10 -31 -0.1034 0.0133
-4 -10 -30 1.5359 -3.1299
-4 -10 -29 0.9691 -0.2423
-4 -10 -28 -1.0587 3.5909
-4 -10 -27 2.0585 0.7059
-4 -10 -26 -1.7569 0.3501
-4 -10 -25 0.4520 1.0849
-4 -10 -24 0.1886 -3.9735
-4 -10 -23 -3.3466 -0.0531
-4 -10 -22 -0.5301 -0.9754
-4 -10 -21 -0.7147 1.1756
-4 -10 -20 0.1779 7.6842
-4 -10 -19 -2.5663 -0.7759
-4 -10 -18 0.4068 -2.5702
-4 -10 -17 1.0772 -0.8328
-4 -10 -16 3.3631 -7.1503
-4 -10 -15 4.3577 -2.4559
-4 -10 -14 -0.4129 3.9254
-4 -10 -13 5.3871 1.6432
-4 -10 -12 -2.9153 2.9761
-4 -10 -11 -1.9895 2.4029
-4 -10 -10 -3.9259 -5.5358
-4 -10 -9 -9.2996 -3.4557
-4 -10 -8 1.8703 -0.8218
-4 -10 -7 -1.0342 -3.4857
-4 -10 -6 6.6755 13.2874
-4 -10 -5 1.8119 6.5666
-4 -10 -4 0.1575 -5.1775
-4 -10 -3 10.1450 2.2390
-4 -10 -2 -2.2026 -10.3313
-4 -10 -1 9.7004 -3.8101
-4 -9 -32 -1.9026 -0.4004
-4 -9 -31 -0.5320 -3.3678
-4 -9 -30 1.5282 0.1970
-4 -9 -29 1.0831 -1.2423
-4 -9 -28 -1.8621 1.4265
-4 -9 -27 3.6854 2.7759
-4 -9 -26 -0.5465 -2.4588
-4 -9 -25 -2.5901 3.5088
-4 -9 -24 2.3270 -0.4253
-4 -9 -23 -3.0334 -1.2713
-4 -9 -22 0.3553 2.6497
-4 -9 -21 1.7224 -0.3899
-4 -9 -20 -0.7199 -0.0513
-4 -9 -19 2.6456 -0.7042
-4 -9 -18 -1.1664 -3.6381
-4 -9 -17 -5.9594 -4.9552
-4 -9 -16 0.6651 1.4071
-4 -9 -15 -1.0139 -2.4249
-4 -9 -14 -4.0113 2.3078
-4 -9 -13 6.6181 1.9544
-4 -9 -12 1.9048 -2.8741
-4 -9 -11 0.1117 11.4507
-4 -9 -10 6.7858 1.2307
-4 -9 -9 -9.1037 2.0833
-4 -9 -8 0.0205 -0.7721
-4 -9 -7 6.4623 -12.8305
-4 -9 -6 -10.5164 0.0030
-4 -9 -5 10.8989 -7.4316
-4 -9 -4 2.3621 0.3188
-4 -9 -3 -11.7337 -0.4092
-4 -9 -2 6.7155 -3.2459
-4 -9 -1 -7.5250 11.6155
-4 -8 -32 0.7674 0.5056
-4 -8 -31 0.5924 -0.1269
-4 -8 -30 -0.1586 -3.4741
-4 -8 -29 1.9850 -3.2480
-4 -8 -28 -3.0116 2.0045
-4 -8 -27 1.9824 3.0463
-4 -8 -26 1.2130 0.6234
-4 -8 -25 -0.2955 3.5380
-4 -8 -24 3.5559 -4.2063
-4 -8 -23 -3.5302 -2.5245
-4 -8 -22 -0.1230 -0.7437
-4 -8 -21 -2.0315 -2.9680
-4 -8 -20 -2.3723 9.3952
-4 -8 -19 -1.6203 5.3280
-4 -8 -18 -2.8874 -1.0046
-4 -8 -17 2.1284 1.3509
-4 -8 -16 -0.1120 -8.2894
-4 -8 -15 4.3171 -8.4634
-4 -8 -14 0.6425 2.7665
-4 -8 -13 3.1809 0.9838
-4 -8 -12 3.6269 4.6726
-4 -8 -11 0.4163 8.2582
-4 -8 -10 2.0889 -6.7466
-4 -8 -9 -10.1899 -4.5375
-4 -8 -8 -3.7565 0.2089
-4 -8 -7 -4.8355 -11.8771
-4 -8 -6 -3.0281 8.7259
-4 -8 -5 4.8358 13.7897
-4 -8 -4 -5.3550 -2.6702
-4 -8 -3 10.1830 8.5745
-4 -8 -2 2.3178 -9.3746
-4 -8 -1 8.6250 -11.1002
-4 -7 -33 -2.6950 -0.1202
-4 -7 -32 -2.0305 0.6680
-4 -7 -31 -0.1760 -1.9345
-4 -7 -30 -0.5454 -0.0068
-4 -7 -29 2.8965 0.2736
-4 -7 -28 -0.6086 -3.1067
-4 -7 -27 0.5372 2.7106
-4 -7 -26 1.5496 -2.1294
-4 -7 -25 -2.5169 1.4760
-4 -7 -24 1.8851 2.5039
-4 -7 -23 -0.5155 -1.5297
-4 -7 -22 0.2033 4.0778
-4 -7 -21 1.6423 0.3383
-4 -7 -20 -0.3790 1.2353
-4 -7 -19 0.3891 -0.6863
-4 -7 -18 -0.4712 -1.7538
-4 -7 -17 -3.2429 -3.7981
-4 -7 -16 -1.3110 -1.5611
-4 -7 -15 0.5621 0.0900
-4 -7 -14 -2.7896 -3.7478
-4 -7 -13 1.9923 1.7376
-4 -7 -12 -0.2103 -5.7117
-4 -7 -11 -1.3623 5.2481
-4 -7 -10 8.5379 7.2082
-4 -7 -9 -1.8217 2.5695
-4 -7 -8 -2.1084 12.5897
-4 -7 -7 6.3390 -7.6827
-4 -7 -6 -11.3833 -3.2465
-4 -7 -5 0.4103 -3.6413
-4 -7 -4 8.0213 -10.7597
-4 -7 -3 -7.2800 -0.1544
-4 -7 -2 4.1205 -12.4451
-4 -7 -1 -1.1062 4.7086
-4 -6 -33 -0.8657 2.4613
-4 -6 -32 -1.0266 1.6590
-4 -6 -31 1.9705 -0.0906
-4 -6 -30 -0.8673 -2.8151
-4 -6 -29 0.6374 -3.4375
-4 -6 -28 -1.5560 -1.3631
-4 -6 -27 -1.2482 1.8555
-4 -6 -26 2.4282 1.3371
-4 -6 -25 -0.3517 5.7458
-4 -6 -24 5.4613 -0.3791
-4 -6 -23 -0.8175 -5.1055
-4 -6 -22 0.5855 -1.4147
-4 -6 -21 -0.7530 -6.2580
-4 -6 -20 -6.4044 3.9932
-4 -6 -19 1.8823 9.8510
-4 -6 -18 -4.3109 2.7602
-4 -6 -17 1.3980 4.7174
-4 -6 -16 -1.7861 -3.8421
-4 -6 -15 -3.1928 -12.9440
-4 -6 -14 2.5832 -0.8783
-4 -6 -13 -0.3485 -2.2370
-4 -6 -12 7.2450 0.1741
-4 -6 -11 4.1209 14.9732
-4 -6 -10 7.4826 -1.8715
-4 -6 -9 -1.2337 -4.5040
-4 -6 -8 -6.8617 5.1432
-4 -6 -7 -1.9348 -12.9490
-4 -6 -6 -11.9615 -1.7301
-4 -6 -5 -0.3400 10.0259
-4 -6 -4 -8.2749 -3.3450
-4 -6 -3 -1.6512 14.7530
-4 -6 -2 4.9226 1.6370
-4 -6 -1 -0.1058 -15.1085
-4 -5 -33 -3.1748 0.2489
-4 -5 -32 -4.1352 -0.7876
-4 -5 -31 0.3228 1.7434
-4 -5 -30 -0.4499 -0.9597
-4 -5 -29 1.5596 2.1636
-4 -5 -28 3.0916 -2.8254
-4 -5 -27 -0.7488 -1.9669
-4 -5 -26 0.5577 -0.6730
-4 -5 -25 -1.0532 -1.6351
-4 -5 -24 -0.8551 1.8451
-4 -5 -23 -0.0558 0.2964
-4 -5 -22 1.2412 5.7368
-4 -5 -21 2.5567 0.3087
-4 -5 -20 2.1699 1.0412
-4 -5 -19 -0.7621 -0.2945
-4 -5 -18 -4.0569 -2.8116
-4 -5 -17 -1.3816 4.0283
-4 -5 -16 -0.4830 -1.7021
-4 -5 -15 -0.6843 2.3448
-4 -5 -14 1.3625 -5.2749
-4 -5 -13 2.6495 -4.8457
-4 -5 -12 -3.0167 -5.3572
-4 -5 -11 -3.6064 -5.6240
-4 -5 -10 3.5766 8.1239
-4 -5 -9 3.5495 -0.1798
-4 -5 -8 2.9139 14.6122
-4 -5 -7 4.2693 8.2364
-4 -5 -6 -5.1486 -3.4553
-4 -5 -5 -8.4711 7.9515
-4 -5 -4 0.2099 -9.5915
-4 -5 -3 0.1028 -1.2015
-4 -5 -2 2.5242 -14.6934
-4 -5 -1 0.8426 -9.8465
-4 -4 -33 1.1938 2.8060
-4 -4 -32 -0.5061 0.8936
-4 -4 -31 0.6397 0.0210
-4 -4 -30 1.4578 -1.8395
-4 -4 -29 -2.5268 -2.7304
-4 -4 -28 -0.6377 -2.2089
-4 -4 -27 -2.4063 -1.1703
-4 -4 -26 -0.4174 0.2238
-4 -4 -25 0.8186 5.3767
-4 -4 -24 5.8402 5.4874
-4 -4 -23 1.8256 -3.2708
-4 -4 -22 0.9711 -3.3440
-4 -4 -21 2.2450 -5.7668
-4 -4 -20 -10.0033 -3.1363
-4 -4 -19 4.4482 6.9222
-4 -4 -18 0.6415 5.8590
-4 -4 -17 -0.6100 6.3003
-4 -4 -16 3.0985 2.0782
-4 -4 -15 -12.9796 -10.6362
-4 -4 -14 -2.2192 -3.8238
-4 -4 -13 -4.1862 -3.6062
-4 -4 -12 2.5081 -7.0533
-4 -4 -11 8.8182 12.5424
-4 -4 -10 7.5402 4.9493
-4 -4 -9 10.3231 -3.8962
-4 -4 -8 -3.3212 7.1543
-4 -4 -7 3.3919 -5.0496
-4 -4 -6 -6.2430 -5.5466
-4 -4 -5 -4.7676 3.0487
-4 -4 -4 -6.1273 -8.0810
-4 -4 -3 -16.7700 9.4458
-4 -4 -2 0.6101 15.2751
-4 -4 -1 -14.0236 -9.2425
-4 -3 -33 -1.5603 2.1028
-4 -3 -32 -5.2516 -2.7336
-4 -3 -31 -3.0416 3.0392
-4 -3 -30 1.4947 1.2023
-4 -3 -29 -0.3003 1.5553
-4 -3 -28 4.0588 2.3678
-4 -3 -27 2.0986 -5.3676
-4 -3 -26 -0.5860 -2.3789
-4 -3 -25 0.7432 -2.5954
-4 -3 -24 -2.6983 -2.5104
-4 -3 -23 -2.4794 1.3837
-4 -3 -22 1.3193 7.5785
-4 -3 -21 2.1464 0.9163
-4 -3 -20 4.9069 -1.1174
-4 -3 -19 3.3927 0.6157
-4 -3 -18 -8.1329 -8.0232
-4 -3 -17 -4.7070 8.5196
-4 -3 -16 1.4186 4.7972
-4 -3 -15 -3.7027 4.0140
-4 -3 -14 4.7806 3.6879
-4 -3 -13 8.1878 -10.4058
-4 -3 -12 -3.4221 -4.8137
-4 -3 -11 -2.7706 -12.9482
-4 -3 -10 -4.6661 -0.6238
-4 -3 -9 -2.3056 -0.9625
-4 -3 -8 9.2433 2.0881
-4 -3 -7 3.6592 15.7089
-4 -3 -6 3.8301 -1.4139
-4 -3 -5 -2.2044 14.9945
-4 -3 -4 -10.9864 4.1138
-4 -3 -3 -0.6000 4.0189
-4 -3 -2 2.2900 -1.3236
-4 -3 -1 -1.3347 -21.7952
-4 -2 -33 0.1797 3.9677
-4 -2 -32 2.4376 -0.3092
-4 -2 -31 -0.6962 -1.2349
-4 -2 -30 3.4393 -0.2869
-4 -2 -29 -2.2025 -2.2183
-4 -2 -28 -2.4695 -1.3787
-4 -2 -27 -1.7789 -2.6418
-4 -2 -26 -4.5057 -1.2768
-4 -2 -25 0.5333 1.0409
-4 -2 -24 5.2908 6.8313
-4 -2 -23 2.9827 3.5385
-4 -2 -22 0.6993 -3.4220
-4 -2 -21 3.6502 -3.7395
-4 -2 -20 -9.7815 -4.5242
-4 -2 -19 2.1009 -0.3605
-4 -2 -18 8.4619 4.8641
-4 -2 -17 -1.4149 6.9313
-4 -2 -16 11.7328 2.9711
-4 -2 -15 -11.2601 -5.1736
-4 -2 -14 -10.6129 -3.1933
-4 -2 -13 -5.3099 -3.0229
-4 -2 -12 -10.6520 -7.0586
-4 -2 -11 7.3646 4.0806
-4 -2 -10 3.9411 5.8980
-4 -2 -9 11.5696 -0.9081
-4 -2 -8 4.2925 3.4309
-4 -2 -7 5.0383 0.5774
-4 -2 -6 5.6297 -2.6700
-4 -2 -5 -1.9691 0.1216
-4 -2 -4 7.0867 -7.5719
-4 -2 -3 -19.5840 -4.3549
-4 -2 -2 -4.8564 15.7333
-4 -2 -1 -18.1201 3.7904
-4 -1 -34 0.5778 -3.4410
-4 -1 -33 -0.0969 1.3423
-4 -1 -32 -2.3026 -2.0159
-4 -1 -31 -7.1789 0.8271
-4 -1 -30 1.1388 3.5934
-4 -1 -29 -0.4674 0.6459
-4 -1 -28 1.5193 6.7364
-4 -1 -27 4.6532 -2.4549
-4 -1 -26 -0.2540 -4.7664
-4 -1 -25 2.3510 -1.6374
-4 -1 -24 -1.3376 -6.6115
-4 -1 -23 -4.9210 0.3512
-4 -1 -22 0.4100 7.3320
-4 -1 -21 0.4817 1.3491
-4 -1 -20 2.6986 -2.6901
-4 -1 -19 10.1214 0.7056
-4 -1 -18 -4.5783 -11.5931
-4 -1 -17 -10.7766 3.4411
-4 -1 -16 1.1991 10.5017
-4 -1 -15 -7.0629 2.1915
-4 -1 -14 2.8102 15.0601
-4 -1 -13 14.7053 -4.7012
-4 -1 -12 -1.5453 -3.6217
-4 -1 -11 1.3165 -7.2254
-4 -1 -9 -14.6324 -1.0881
-4 -1 -8 5.5680 -10.4932
-4 -1 -7 3.3267 7.6181
-4 -1 -6 3.6976 -2.3208
-4 -1 -5 12.5162 8.5588
-4 -1 -4 -7.3191 14.9760
-4 -1 -3 -6.0677 3.7875
-4 -1 -2 1.0546 22.0351
-4 -1 -1 -4.0676 -13.2648
-3 -30 -3 0.3414 -1.4106
-3 -30 -2 -0.5838 -1.3674
-3 -30 -1 -2.3450 0.7082
-3 -29 -9 2.2435 -0.4746
-3 -29 -8 1.4534 1.5246
-3 -29 -7 -0.1244 0.1318
-3 -29 -6 1.1403 2.7863
-3 -29 -5 -1.4557 -0.5868
-3 -29 -4 -3.3591 -2.7093
-3 -29 -3 0.6382 2.3359
-3 -29 -2 -0.0348 0.5597
-3 -29 -1 0.6373 2.5802
-3 -28 -13 -1.8906 -0.1367
-3 -28 -12 0.3965 1.2728
-3 -28 -11 -0.9060 -2.4187
-3 -28 -10 -2.0353 -1.4354
-3 -28 -9 -0.5380 -0.0473
-3 -28 -8 0.6850 -1.3417
-3 -28 -7 1.8475 0.8623
-3 -28 -6 1.5368 4.7370
-3 -28 -5 2.1233 -2.4698
-3 -28 -4 1.9001 0.5365
-3 -28 -3 1.1173 1.4758
-3 -28 -2 0.1316 -1.9473
-3 -28 -1 -2.0845 2.1708
-3 -27 -15 -0.8359 0.7391
-3 -27 -14 0.0152 2.9166
-3 -27 -13 -3.2536 2.0904
-3 -27 -12 1.3740 1.8679
-3 -27 -11 -1.9666 -0.8454
-3 -27 -10 -1.1765 -3.4112
-3 -27 -9 1.9326 -5.1690
-3 -27 -8 2.9770 -0.3233
-3 -27 -7 2.6200 -0.2222
-3 -27 -6 -0.1556 0.3142
-3 -27 -5 0.4578 2.0088
-3 -27 -4 -2.4837 -2.7083
-3 -27 -3 -1.0711 -0.5729
-3 -27 -2 -0.5075 1.2521
-3 -27 -1 -0.1240 1.1613
-3 -26 -17 0.9195 1.8847
-3 -26 -16 2.0317 0.2638
-3 -26 -15 -1.3849 1.9555
-3 -26 -14 1.2507 1.2193
-3 -26 -13 -1.1742 -0.4979
-3 -26 -12 -1.3000 1.6113
-3 -26 -11 0.4655 -2.0659
-3 -26 -10 -3.2075 -3.6246
-3 -26 -9 -1.3437 -2.7119
-3 -26 -8 -2.2837 -0.1372
-3 -26 -7 0.1730 -1.5716
-3 -26 -6 1.4191 3.8253
-3 -26 -5 0.6071 1.1034
-3 -26 -4 3.0731 -1.8532
-3 -26 -3 3.5596 2.4413
-3 -26 -2 1.2251 -1.2020
-3 -26 -1 -1.6816 2.3913
-3 -25 -19 0.6055 0.7021
-3 -25 -18 2.9028 -0.2426
-3 -25 -17 0.8932 -2.6461
-3 -25 -16 -0.1397 -0.2394
-3 -25 -15 -0.6866 -1.9089
-3 -25 -14 0.9764 2.1938
-3 -25 -13 -3.8206 2.0321
-3 -25 -12 -1.7444 4.1458
-3 -25 -11 -1.8916 2.7794
-3 -25 -10 -2.7581 1.1145
-3 -25 -9 0.0068 -4.0471
-3 -25 -8 0.6702 -4.0349
-3 -25 -7 3.7968 0.0789
-3 -25 -6 1.0711 -3.1238
-3 -25 -5 1.5980 1.7237
-3 -25 -4 -0.0401 0.0033
-3 -25 -3 0.3720 -3.1568
-3 -25 -2 -0.1969 0.6365
-3 -25 -1 -2.1240 -0.9741
-3 -24 -21 -1.4905 -0.2798
-3 -24 -20 0.3906 -2.2456
-3 -24 -19 -1.6623 1.9349
-3 -24 -18 -0.3191 -1.2385
-3 -24 -17 0.0216 -0.2293
-3 -24 -16 3.9286 0.4797
-3 -24 -15 -0.1297 1.6893
-3 -24 -14 0.8206 4.8180
-3 -24 -13 2.6096 0.2186
-3 -24 -12 -3.1326 1.9791
-3 -24 -11 2.6366 1.1129
-3 -24 -10 -1.5309 -2.4807
-3 -24 -9 -1.3960 -3.1205
-3 -24 -8 -2.8894 -0.6533
-3 -24 -7 -3.6059 -3.5182
-3 -24 -6 0.0692 0.0418
-3 -24 -5 -1.4487 1.9190
-3 -24 -4 1.7394 -3.1303
-3 -24 -3 2.3992 2.5651
-3 -24 -2 1.9958 -0.7332
-3 -24 -1 1.0645 1.3992
-3 -23 -22 -4.2782 -3.5722
-3 -23 -21 0.7824 0.7796
-3 -23 -20 1.7177 1.5294
-3 -23 -19 -1.3845 -1.7341
-3 -23 -18 2.1507 2.3079
-3 -23 -17 3.0513 -2.0191
-3 -23 -16 2.0661 -1.2091
-3 -23 -15 -0.4344 -3.5731
-3 -23 -14 1.8009 -0.0752
-3 -23 -13 -0.6712 -0.4090
-3 -23 -12 -3.0191 1.8682
-3 -23 -11 0.3152 3.7733
-3 -23 -10 -2.5511 3.6660
-3 -23 -9 -2.9768 3.2272
-3 -23 -8 -2.0399 -3.5703
-3 -23 -7 -0.3838 0.7127
-3 -23 -6 0.0758 -4.0243
-3 -23 -5 3.3841 -1.0001
-3 -23 -4 0.5168 3.5557
-3 -23 -3 0.9767 -3.6070
-3 -23 -2 4.5229 0.6588
-3 -23 -1 -1.8718 -3.5891
-3 -22 -24 -0.0540 1.8401
-3 -22 -23 -1.6951 -2.9309
-3 -22 -22 2.2557 -1.1246
-3 -22 -21 -1.4443 1.4639
-3 -22 -20 0.1023 -1.5459
-3 -22 -19 -0.9734 0.0500
-3 -22 -18 -2.9809 -1.2473
-3 -22 -17 -3.2802 -1.6634
-3 -22 -16 2.8671 -0.6194
-3 -22 -15 2.8256 -0.6301
-3 -22 -14 -1.3758 5.4550
-3 -22 -13 5.2064 1.0631
-3 -22 -12 -3.2771 -0.1503
-3 -22 -11 1.6381 4.1484
-3 -22 -10 2.9502 0.7665
-3 -22 -9 0.1648 -0.0501
-3 -22 -8 0.6837 1.6054
-3 -22 -7 -4.2935 -3.9160
-3 -22 -6 -1.7628 -3.0460
-3 -22 -5 -2.9216 1.4187
-3 -22 -4 0.5085 -4.9437
-3 -22 -3 -0.8944 0.9082
-3 -22 -2 -2.6459 0.6355
-3 -22 -1 3.4619 -3.6317
-3 -21 -25 0.7515 1.6485
-3 -21 -24 -0.6747 -0.6469
-3 -21 -23 2.4088 3.1928
-3 -21 -22 -2.0119 -1.6543
-3 -21 -21 -2.7100 -2.2875
-3 -21 -20 0.9501 4.4347
-3 -21 -19 -1.0668 -1.0750
-3 -21 -18 -1.1637 2.0964
-3 -21 -17 3.2115 0.4736
-3 -21 -16 4.9603 -1.4449
-3 -21 -15 -0.3584 -3.3425
-3 -21 -14 -0.3612 -1.7710
-3 -21 -13 2.3384 -1.6246
-3 -21 -12 -1.6511 -2.3538
-3 -21 -11 2.6023 1.1393
-3 -21 -10 2.1354 0.1269
-3 -21 -9 -3.3627 6.7287
-3 -21 -8 -2.4066 1.0020
-3 -21 -7 -3.5565 1.3715
-3 -21 -6 -5.2330 -0.7830
-3 -21 -5 2.5440 -3.4969
-3 -21 -4 1.9175 5.2507
-3 -21 -3 -2.3346 -1.1995
-3 -21 -2 5.8503 1.4394
-3 -21 -1 2.1976 -0.8474
-3 -20 -26 0.3210 0.3291
-3 -20 -25 -0.9655 -0.4290
-3 -20 -24 1.0443 1.8473
-3 -20 -23 -0.6626 -0.6101
-3 -20 -22 2.0676 -2.3101
-3 -20 -21 2.2326 0.6791
-3 -20 -20 0.6906 0.5669
-3 -20 -19 0.0866 0.0499
-3 -20 -18 -2.5258 -2.9755
-3 -20 -17 -6.2740 -2.0356
-3 -20 -16 -3.4025 0.0603
-3 -20 -15 4.2477 -2.6092
-3 -20 -14 -2.0245 2.2430
-3 -20 -13 3.5862 1.2979
-3 -20 -12 -0.1129 -3.0497
-3 -20 -11 -2.3035 2.5375
-3 -20 -10 3.8341 2.4723
-3 -20 -9 1.0695 2.3735
-3 -20 -8 4.0251 5.2576
-3 -20 -7 0.3276 -0.2603
-3 -20 -6 -0.7912 -3.5131
-3 -20 -5 -2.4191 0.6708
-3 -20 -4 -0.3249 -4.4277
-3 -20 -3 -0.8505 -2.5524
-3 -20 -2 -7.4739 2.9173
-3 -20 -1 0.9396 -5.2098
-3 -19 -27 -0.7256 -1.3439
-3 -19 -26 -1.6926 -0.9177
-3 -19 -25 1.2037 0.5222
-3 -19 -24 -0.7915 -1.3527
-3 -19 -23 1.4712 1.0877
-3 -19 -22 1.4890 1.3358
-3 -19 -21 -1.8585 -3.7119
-3 -19 -20 -3.5331 2.7643
-3 -19 -19 -1.4047 2.2019
-3 -19 -18 -1.5342 2.1811
-3 -19 -17 -0.0976 3.2502
-3 -19 -16 5.8530 0.2960
-3 -19 -15 1.1046 -0.4364
-3 -19 -14 -3.3362 -1.8159
-3 -19 -13 1.2355 -2.0487
-3 -19 -12 -0.9028 -4.2956
-3 -19 -11 2.8446 -1.5669
-3 -19 -10 6.4444 -4.2628
-3 -19 -9 -0.2112 2.7144
-3 -19 -8 0.4983 3.7008
-3 -19 -7 -1.5106 0.6358
-3 -19 -6 -8.8157 3.3393
-3 -19 -5 -2.5595 -2.6790
-3 -19 -4 2.3103 2.8181
-3 -19 -3 -3.2996 1.8646
-3 -19 -2 2.3505 0.3385
-3 -19 -1 4.5054 4.5424
-3 -18 -28 1.1420 1.2706
-3 -18 -27 -1.1494 0.5785
-3 -18 -26 -0.3054 -0.3527
-3 -18 -25 -2.3949 -0.6137
-3 -18 -24 -0.6053 0.9425
-3 -18 -23 0.7093 0.6796
-3 -18 -22 0.0676 0.2721
-3 -18 -21 4.0651 1.3672
-3 -18 -20 4.7290 -0.4630
-3 -18 -19 1.7094 1.6953
-3 -18 -18 0.4637 -2.7414
-3 -18 -17 -2.0980 -3.0904
-3 -18 -16 -7.7689 2.1502
-3 -18 -15 -0.1899 -1.0165
-3 -18 -14 -1.0375 -0.1626
-3 -18 -13 -2.0007 -0.5914
-3 -18 -12 2.0520 -4.3245
-3 -18 -11 -2.3982 -0.4635
-3 -18 -10 0.7942 -0.4761
-3 -18 -9 0.2457 1.7372
-3 -18 -8 2.8118 7.0061
-3 -18 -7 3.7881 3.4981
-3 -18 -6 2.7554 0.1383
-3 -18 -5 0.6156 0.6970
-3 -18 -4 -1.5467 -3.0443
-3 -18 -3 0.8153 -4.8965
-3 -18 -2 -5.6492 1.5148
-3 -18 -1 -3.0121 -1.2496
-3 -17 -29 2.7528 0.8595
-3 -17 -28 -1.4480 2.2154
-3 -17 -27 -0.4989 1.0772
-3 -17 -26 -1.3993 -1.6382
-3 -17 -25 -0.3635 -0.6877
-3 -17 -24 0.8476 -1.5527
-3 -17 -23 2.0984 -2.1929
-3 -17 -22 1.7864 1.2834
-3 -17 -21 1.9142 -2.2589
-3 -17 -20 -4.0199 -1.0930
-3 -17 -19 -4.7014 1.8195
-3 -17 -18 0.5717 0.3284
-3 -17 -17 -1.7743 3.5516
-3 -17 -16 3.6699 2.1958
-3 -17 -15 2.7701 3.5494
-3 -17 -14 -4.1965 3.9178
-3 -17 -13 -0.4948 0.0190
-3 -17 -12 -3.5033 -3.9715
-3 -17 -11 -0.4431 -2.5344
-3 -17 -10 8.6403 -6.3192
-3 -17 -9 2.0920 -4.0328
-3 -17 -8 2.9809 2.5188
-3 -17 -7 4.8996 -1.1386
-3 -17 -6 -6.8497 4.9436
-3 -17 -5 -6.8885 2.1129
-3 -17 -4 -0.5746 -0.7965
-3 -17 -3 -3.9379 2.9423
-3 -17 -2 -0.8601 -2.2290
-3 -17 -1 4.8351 3.1948
-3 -16 -29 1.7125 0.1481
-3 -16 -28 2.6020 -0.6491
-3 -16 -27 -0.1505 1.2172
-3 -16 -26 -0.6592 -0.7763
-3 -16 -25 -2.0057 -2.5106
-3 -16 -24 -3.3100 -0.8419
-3 -16 -23 -0.5354 0.0799
-3 -16 -22 -0.8299 1.5791
-3 -16 -21 0.8843 4.4779
-3 -16 -20 5.2795 -1.2842
-3 -16 -19 3.7765 0.0705
-3 -16 -18 1.0772 -0.6518
-3 -16 -17 4.1500 -3.4174
-3 -16 -16 -0.9425 2.5974
-3 -16 -15 -3.3263 1.4314
-3 -16 -14 0.3787 2.3718
-3 -16 -13 -4.5217 0.0097
-3 -16 -12 -2.1377 -6.6556
-3 -16 -11 -1.5321 -1.8265
-3 -16 -10 -1.4456 -3.8767
-3 -16 -9 -1.1008 -3.3364
-3 -16 -8 0.4311 7.5079
-3 -16 -7 2.8559 5.4721
-3 -16 -6 4.0358 2.8281
-3 -16 -5 4.9623 3.4657
-3 -16 -4 -1.7340 -0.8060
-3 -16 -3 0.5010 -4.4709
-3 -16 -2 -0.1607 -2.0876
-3 -16 -1 -4.3038 -0.4304
-3 -15 -30 -2.0113 -1.2273
-3 -15 -29 1.7374 -0.1518
-3 -15 -28 -0.5179 1.9498
-3 -15 -27 -1.9159 3.1978
-3 -15 -26 -1.0526 0.0685
-3 -15 -25 -1.9830 -0.1349
-3 -15 -24 0.5891 -0.6918
-3 -15 -23 3.4194 -4.3164
-3 -15 -22 1.0119 -0.1896
-3 -15 -21 2.4243 0.1880
-3 -15 -20 -0.0247 -2.1706
-3 -15 -19 -5.3858 1.0927
-3 -15 -18 0.8893 -3.5202
-3 -15 -17 -0.7588 -1.7988
-3 -15 -16 0.9698 0.7851
-3 -15 -15 4.2882 0.7870
-3 -15 -14 -3.7369 7.9357
-3 -15 -13 -0.4733 8.3807
-3 -15 -12 -4.2263 0.2652
-3 -15 -11 -7.9375 0.2351
-3 -15 -10 7.6212 -3.1625
-3 -15 -9 5.8712 -10.7602
-3 -15 -8 1.5342 -1.9666
-3 -15 -7 8.7818 -2.8783
-3 -15 -6 -0.1075 1.1040
-3 -15 -5 -6.4646 8.0318
-3 -15 -4 -2.2561 -0.9251
-3 -15 -3 -4.5009 2.5390
-3 -15 -2 -5.7648 -1.3817
-3 -15 -1 2.6329 -3.8308
-3 -14 -31 -0.6115 -1.1206
-3 -14 -30 -0.0073 1.1671
-3 -14 -29 -0.3885 2.1952
-3 -14 -28 2.0278 0.3405
-3 -14 -27 2.0229 1.6746
-3 -14 -26 0.0709 -0.4076
-3 -14 -25 -0.7896 -2.6315
-3 -14 -24 -2.2093 -2.4490
-3 -14 -23 -2.8808 -1.7476
-3 -14 -22 -1.2935 0.9824
-3 -14 -21 -1.0454 4.6112
-3 -14 -20 -0.5463 0.5713
-3 -14 -19 2.7723 -1.9853
-3 -14 -18 0.2668 -0.7195
-3 -14 -17 2.2220 -2.4632
-3 -14 -16 6.9019 1.6840
-3 -14 -15 0.7169 1.1928
-3 -14 -14 1.8254 4.1214
-3 -14 -13 0.4158 6.5438
-3 -14 -12 -3.3357 -5.8697
-3 -14 -11 -4.1363 -5.2348
-3 -14 -10 -2.8254 -4.7586
-3 -14 -9 -1.6885 -9.3565
-3 -14 -8 -2.2563 3.8870
-3 -14 -7 1.2112 7.4863
-3 -14 -6 0.6100 4.0348
-3 -14 -5 5.5550 4.7046
-3 -14 -4 1.8839 1.4388
-3 -14 -3 -0.5690 -0.0982
-3 -14 -2 5.8792 -2.7458
-3 -14 -1 -2.7926 -0.9840
-3 -13 -31 3.7721 -1.6274
-3 -13 -30 0.6794 -1.5707
-3 -13 -29 0.3318 -1.2193
-3 -13 -28 -0.3559 -0.4557
-3 -13 -27 -2.0459 2.6404
-3 -13 -26 -0.5857 1.9012
-3 -13 -25 -2.8663 0.6505
-3 -13 -24 -0.1732 2.0733
-3 -13 -23 2.8451 -4.5775
-3 -13 -22 -0.1660 -1.6395
-3 -13 -21 0.0371 3.1908
-3 -13 -20 1.2733 -1.6630
-3 -13 -19 -1.6511 2.3790
-3 -13 -18 1.1319 -2.0553
-3 -13 -17 0.9599 -7.2061
-3 -13 -16 -1.1059 -2.2578
-3 -13 -15 4.4377 -4.9267
-3 -13 -14 -1.8582 -1.2129
-3 -13 -13 -2.0939 11.4612
-3 -13 -12 -0.7281 7.5574
-3 -13 -11 -11.7315 3.1165
-3 -13 -10 -0.4543 7.7692
-3 -13 -9 8.8535 -9.7635
-3 -13 -8 2.5733 -8.3013
-3 -13 -7 6.4763 -0.8259
-3 -13 -6 4.0432 -8.2867
-3 -13 -5 -0.6929 7.3238
-3 -13 -4 -1.2367 2.4333
-3 -13 -3 -1.2326 -1.2442
-3 -13 -2 -5.3546 4.1956
-3 -13 -1 -3.7883 -7.1359
-3 -12 -32 0.6437 -0.4828
-3 -12 -31 -0.2069 -0.7736
-3 -12 -30 0.7385 0.3907
-3 -12 -29 -1.4776 1.6356
-3 -12 -28 -0.4550 0.6807
-3 -12 -27 1.7063 3.2388
-3 -12 -26 1.3209 0.0274
-3 -12 -25 -0.7656 -1.7598
-3 -12 -24 1.0353 -0.1975
-3 -12 -23 -0.0964 -3.2280
-3 -12 -22 -2.0235 0.4842
-3 -12 -21 0.9426 2.1229
-3 -12 -20 -5.5460 0.8242
-3 -12 -19 -3.5462 -0.8018
-3 -12 -18 0.1985 -2.6606
-3 -12 -17 -3.0431 -1.8873
-3 -12 -16 5.7415 1.2803
-3 -12 -15 4.8326 0.8312
-3 -12 -14 2.6160 1.5006
-3 -12 -13 4.7186 9.9821
-3 -12 -12 1.7900 1.9736
-3 -12 -11 -4.0519 -5.8135
-3 -12 -10 -4.2389 -5.1451
-3 -12 -9 1.0527 -11.7601
-3 -12 -8 -4.0668 -3.1048
-3 -12 -7 0.7270 3.6129
-3 -12 -6 -3.1935 4.4344
-3 -12 -5 -4.1809 6.7307
-3 -12 -4 4.8946 -1.3729
-3 -12 -3 -2.4727 3.4666
-3 -12 -2 10.6099 0.8661
-3 -12 -1 5.2929 -1.3399
-3 -11 -32 -2.0559 0.4206
-3 -11 -31 2.5204 -0.0311
-3 -11 -30 2.7096 -0.5427
-3 -11 -29 1.2871 -0.4620
-3 -11 -28 0.0884 -1.6086
-3 -11 -27 -2.7712 -0.3673
-3 -11 -26 0.8759 2.9938
-3 -11 -25 -1.6169 -0.5938
-3 -11 -24 -0.5471 2.9579
-3 -11 -23 2.7395 -2.2415
-3 -11 -22 -1.3054 -3.3352
-3 -11 -21 -1.9545 6.0467
-3 -11 -20 -2.3491 0.4992
-3 -11 -19 0.1612 2.1478
-3 -11 -18 2.4873 2.7031
-3 -11 -17 3.2732 -5.7239
-3 -11 -16 0.6554 -4.4486
-3 -11 -15 2.3977 -4.7974
-3 -11 -14 0.2396 -10.5728
-3 -11 -13 -4.7100 0.5282
-3 -11 -12 0.7840 10.4920
-3 -11 -11 -6.4224 1.6600
-3 -11 -10 -7.1307 14.0166
-3 -11 -9 2.5761 2.5658
-3 -11 -8 3.0575 -11.6398
-3 -11 -7 5.2030 6.7054
-3 -11 -6 0.5954 -11.6958
-3 -11 -5 3.4031 -2.3847
-3 -11 -4 3.7258 7.0665
-3 -11 -3 -0.0964 -10.3592
-3 -11 -2 4.2596 6.0712
-3 -11 -1 -4.6818 -4.8908
-3 -10 -33 -4.2836 -1.5069
-3 -10 -32 0.4630 -0.3896
-3 -10 -31 -0.1936 -0.6329
-3 -10 -30 1.6230 -1.1284
-3 -10 -29 0.2381 1.5576
-3 -10 -28 -0.4523 -0.9383
-3 -10 -27 -0.1816 1.9415
-3 -10 -26 0.2735 1.7813
-3 -10 -25 -2.3004 -2.5247
-3 -10 -24 0.1646 2.8340
-3 -10 -23 5.5610 -1.5762
-3 -10 -22 0.0623 0.2356
-3 -10 -21 5.1267 1.3513
-3 -10 -20 -2.5777 -1.4437
-3 -10 -19 -10.5340 1.8299
-3 -10 -18 -1.7707 -3.9889
-3 -10 -17 -7.2132 -3.3265
-3 -10 -16 -0.3704 1.0529
-3 -10 -15 5.5539 1.6065
-3 -10 -14 2.6323 0.0496
-3 -10 -13 6.7632 5.3815
-3 -10 -12 5.1682 6.5449
-3 -10 -11 -2.3204 0.3108
-3 -10 -10 -4.8493 -0.1186
-3 -10 -9 4.1533 -8.5599
-3 -10 -8 -2.5602 -5.8193
-3 -10 -7 3.4394 -3.1853
-3 -10 -6 1.4620 -4.3634
-3 -10 -5 -18.1966 8.8867
-3 -10 -4 0.5578 -2.8413
-3 -10 -3 -9.0884 -1.7559
-3 -10 -2 2.3225 5.8102
-3 -10 -1 19.5211 -3.4977
-3 -9 -33 0.1971 -0.8402
-3 -9 -32 -3.2554 -0.6579
-3 -9 -31 0.0986 -0.3861
-3 -9 -30 2.5628 -0.2712
-3 -9 -29 0.6980 -0.4568
-3 -9 -28 2.2748 0.3281
-3 -9 -27 -2.8752 -2.4871
-3 -9 -26 -0.6172 2.8092
-3 -9 -25 1.3857 -0.3328
-3 -9 -24 -0.3533 -0.0523
-3 -9 -23 3.2524 -0.2246
-3 -9 -22 -0.4200 -4.5053
-3 -9 -21 -0.8047 5.3343
-3 -9 -20 -5.6673 3.3509
-3 -9 -19 -3.4221 2.1731
-3 -9 -18 1.8940 5.6464
-3 -9 -17 2.6975 -0.1817
-3 -9 -16 5.9419 -3.4735
-3 -9 -15 2.7564 -3.8340
-3 -9 -14 0.6251 -9.1091
-3 -9 -13 -4.7785 -10.3155
-3 -9 -12 -1.2215 4.2037
-3 -9 -11 0.8821 -0.2323
-3 -9 -10 -2.6398 8.2828
-3 -9 -9 -2.6092 13.2165
-3 -9 -8 -4.8750 -8.8968
-3 -9 -7 2.8846 12.3735
-3 -9 -6 -3.2432 -1.6684
-3 -9 -5 -3.0821 -11.1763
-3 -9 -4 7.8957 12.9304
-3 -9 -3 -0.9730 -16.0490
-3 -9 -2 10.1487 -1.2221
-3 -9 -1 4.1087 -2.1983
-3 -8 -33 -5.4501 -0.5293
-3 -8 -32 -0.9888 0.0795
-3 -8 -31 -1.7662 1.3424
-3 -8 -30 -0.5472 -2.1139
-3 -8 -29 1.9654 0.8289
-3 -8 -28 1.9936 -0.0700
-3 -8 -27 1.2617 -2.3049
-3 -8 -26 -0.5699 2.2185
-3 -8 -25 -3.5679 -2.4685
-3 -8 -24 -4.5604 2.2522
-3 -8 -23 5.5569 1.4501
-3 -8 -22 2.0690 0.0186
-3 -8 -21 7.0488 3.0496
-3 -8 -20 8.3108 -3.5263
-3 -8 -19 -9.6645 2.9859
-3 -8 -18 -3.3189 -2.1556
-3 -8 -17 -8.6497 -5.3446
-3 -8 -16 -11.0204 0.5043
-3 -8 -15 3.4163 0.5122
-3 -8 -14 0.5781 1.0597
-3 -8 -13 7.1404 -0.5976
-3 -8 -12 10.6840 1.2820
-3 -8 -11 -1.8508 2.0577
-3 -8 -10 -4.7752 7.9363
-3 -8 -9 5.0464 2.6844
-3 -8 -8 -3.1770 -1.4283
-3 -8 -7 5.0467 0.0039
-3 -8 -6 16.0609 -12.3233
-3 -8 -5 -20.1315 0.3033
-3 -8 -4 -5.8744 0.3350
-3 -8 -3 -12.8251 -9.4391
-3 -8 -2 -25.2856 3.7523
-3 -8 -1 22.7271 -3.8848
-3 -7 -34 1.4691 2.1841
-3 -7 -33 0.8411 0.5763
-3 -7 -32 -1.4042 0.6650
-3 -7 -31 -2.4845 -1.3379
-3 -7 -30 1.4583 0.0503
-3 -7 -29 -0.8841 -1.9352
-3 -7 -28 2.0225 1.2111
-3 -7 -27 0.6940 -1.2420
-3 -7 -26 -2.9603 -0.1214
-3 -7 -25 1.6197 1.6517
-3 -7 -24 0.5386 -1.8643
-3 -7 -23 3.1959 -0.3776
-3 -7 -22 0.4915 -3.5104
-3 -7 -21 1.6997 1.6784
-3 -7 -20 -3.1800 3.1173
-3 -7 -19 -7.4178 1.4537
-3 -7 -18 -0.0109 6.9755
-3 -7 -17 -1.8934 3.7505
-3 -7 -16 6.3205 1.1213
-3 -7 -15 5.2587 -2.0353
-3 -7 -14 -0.5743 -4.7217
-3 -7 -13 -2.0860 -9.6013
-3 -7 -12 -3.1517 -5.8357
-3 -7 -11 3.6408 -3.0801
-3 -7 -10 5.8930 -1.4949
-3 -7 -9 4.2601 11.3909
-3 -7 -8 -6.6061 -2.4473
-3 -7 -7 -4.4044 10.3802
-3 -7 -6 -3.9881 13.1811
-3 -7 -5 -11.5564 -10.3077
-3 -7 -4 0.4153 16.5086
-3 -7 -3 -3.9911 -8.0812
-3 -7 -2 7.7003 -10.1771
-3 -7 -1 13.3404 1.1700
-3 -6 -34 5.3964 -1.6535
-3 -6 -33 -2.6070 -0.9262
-3 -6 -32 -1.5284 0.7275
-3 -6 -31 -0.9287 2.1913
-3 -6 -30 -4.3747 0.1286
-3 -6 -29 0.5266 -0.8136
-3 -6 -28 2.3399 1.0834
-3 -6 -27 3.1108 -3.8775
-3 -6 -26 1.2837 -0.6663
-3 -6 -25 -1.9125 -1.6378
-3 -6 -24 -6.2822 0.3060
-3 -6 -23 0.2893 3.5127
-3 -6 -22 1.4595 -0.3226
-3 -6 -21 2.0804 5.2668
-3 -6 -20 15.2640 -3.1170
-3 -6 -19 0.3131 -0.2218
-3 -6 -18 -2.9225 1.0805
-3 -6 -17 -1.3716 -4.1030
-3 -6 -16 -17.9336 2.8183
-3 -6 -15 -3.2622 -1.3078
-3 -6 -14 -1.4943 1.3014
-3 -6 -13 -1.0319 -3.1159
-3 -6 -12 14.1691 -8.1007
-3 -6 -11 1.4106 -4.0840
-3 -6 -10 -4.3448 4.0634
-3 -6 -9 6.4448 12.3795
-3 -6 -8 -3.3554 7.7446
-3 -6 -7 -0.1717 7.8646
-3 -6 -6 25.8518 -2.3337
-3 -6 -5 -5.1212 -6.8534
-3 -6 -4 -7.9571 -1.6154
-3 -6 -3 -1.3451 -9.1775
-3 -6 -2 -46.7330 -3.3707
-3 -6 -1 1.9867 -7.8848
-3 -5 -34 3.3279 2.9163
-3 -5 -33 0.0011 -0.0569
-3 -5 -32 1.6168 1.9733
-3 -5 -31 -1.6092 -1.7259
-3 -5 -30 -1.7473 0.1846
-3 -5 -29 -1.2346 -1.0282
-3 -5 -28 -1.8262 -0.0374
-3 -5 -27 2.5041 2.7096
-3 -5 -26 -0.5373 -2.6534
-3 -5 -25 0.1545 0.9000
-3 -5 -24 0.7986 -1.1954
-3 -5 -23 3.5740 -3.0693
-3 -5 -22 0.8436 -0.9001
-3 -5 -21 0.4156 -0.7672
-3 -5 -20 1.4471 2.0896
-3 -5 -19 -6.7473 0.9819
-3 -5 -18 0.3497 4.7865
-3 -5 -17 -3.2313 3.0425
-3 -5 -16 0.9385 2.1057
-3 -5 -15 4.9730 1.1974
-3 -5 -14 -5.4667 -0.0992
-3 -5 -13 -0.2963 1.4787
-3 -5 -12 -3.5703 -7.6391
-3 -5 -11 0.6907 -4.8210
-3 -5 -10 9.9134 -8.4900
-3 -5 -9 10.6937 -5.3042
-3 -5 -8 5.2559 0.6753
-3 -5 -7 -3.1667 0.9559
-3 -5 -6 -4.7548 18.5086
-3 -5 -5 -9.6452 3.6503
-3 -5 -4 -6.7767 13.2871
-3 -5 -3 -13.8404 8.0913
-3 -5 -2 -3.9255 -11.1750
-3 -5 -1 16.4022 4.7312
-3 -4 -34 3.5381 -1.5369
-3 -4 -33 1.3645 -3.4899
-3 -4 -32 -2.0527 1.0322
-3 -4 -31 2.1674 1.2865
-3 -4 -30 -3.6662 2.9825
-3 -4 -29 -1.4450 0.9603
-3 -4 -28 1.0677 0.1466
-3 -4 -27 1.9750 -2.3675
-3 -4 -26 2.1459 -3.8089
-3 -4 -25 -0.1386 -2.9131
-3 -4 -24 -2.6816 -1.7526
-3 -4 -23 -4.7295 3.9332
-3 -4 -22 -0.0591 0.5159
-3 -4 -21 -1.6865 5.7671
-3 -4 -20 9.5263 0.9126
-3 -4 -19 10.2158 -4.7455
-3 -4 -18 -2.3267 -0.4203
-3 -4 -17 4.4450 -2.9015
-3 -4 -16 -10.7051 8.6988
-3 -4 -15 -7.6368 1.9599
-3 -4 -14 0.7631 1.4985
-3 -4 -13 -7.5195 0.9458
-3 -4 -12 7.0545 -15.4203
-3 -4 -11 0.9295 -9.2711
-3 -4 -10 -4.8132 -8.5379
-3 -4 -9 3.0820 4.0420
-3 -4 -8 -1.1947 15.5324
-3 -4 -7 -1.1511 9.3719
-3 -4 -6 19.5888 9.6597
-3 -4 -5 14.4939 2.7683
-3 -4 -4 -4.3615 -4.4537
-3 -4 -3 13.2256 -5.7320
-3 -4 -2 -32.3885 -1.5602
-3 -4 -1 -24.6571 -12.7685
-3 -3 -34 2.7414 3.2325
-3 -3 -33 -0.2070 -0.1728
-3 -3 -32 1.9840 1.4061
-3 -3 -31 3.1283 -2.2476
-3 -3 -30 -3.3380 -2.2451
-3 -3 -29 -1.0892 0.5630
-3 -3 -28 -4.5618 -1.8624
-3 -3 -27 -2.2621 6.1616
-3 -3 -26 2.5114 0.2113
-3 -3 -25 0.3973 -0.5752
-3 -3 -24 0.6858 1.9470
-3 -3 -23 3.9410 -7.4781
-3 -3 -22 2.4791 -1.8487
-3 -3 -21 -1.7846 -1.6728
-3 -3 -20 1.4965 -1.2695
-3 -3 -19 -4.3043 5.9125
-3 -3 -18 1.7978 5.2072
-3 -3 -17 1.9123 -0.8647
-3 -3 -16 -1.8110 -1.4136
-3 -3 -15 5.5608 -2.5422
-3 -3 -14 -10.8487 -3.3752
-3 -3 -13 -4.7295 13.9266
-3 -3 -12 -2.5173 2.1130
-3 -3 -11 -7.2757 1.6224
-3 -3 -10 9.1350 2.5122
-3 -3 -9 8.3399 -24.6081
-3 -3 -8 11.9106 -6.8511
-3 -3 -7 8.6202 -10.0430
-3 -3 -6 -3.4559 -0.8408
-3 -3 -5 -4.4403 20.6563
-3 -3 -4 0.2456 10.1371
-3 -3 -3 -11.9059 16.8667
-3 -3 -2 -19.9479 -0.7463
-3 -3 -1 7.2108 3.2103
-3 -2 -35 -1.4814 2.5831
-3 -2 -34 -1.4919 0.5624
-3 -2 -33 2.0300 -3.8806
-3 -2 -32 -2.7926 -0.2837
-3 -2 -31 2.0210 -0.3662
-3 -2 -30 -0.1613 2.7793
-3 -2 -29 -0.8512 4.9773
-3 -2 -28 0.9334 0.0633
-3 -2 -27 0.9705 0.3282
-3 -2 -26 2.4385 -3.7613
-3 -2 -25 -0.9243 -5.0427
-3 -2 -24 1.5235 -3.1025
-3 -2 -23 -5.6988 0.5517
-3 -2 -22 -5.6070 1.7339
-3 -2 -21 0.9364 4.3158
-3 -2 -20 0.9330 3.9597
-3 -2 -19 10.4448 -3.4475
-3 -2 -18 2.7984 -3.5676
-3 -2 -17 0.4126 -7.6244
-3 -2 -16 -2.7561 9.1310
-3 -2 -15 -4.6760 9.8603
-3 -2 -14 3.6550 2.0909
-3 -2 -13 -2.5111 11.7772
-3 -2 -12 4.6913 -13.3575
-3 -2 -11 -3.6602 -11.1122
-3 -2 -10 -6.6998 -11.4912
-3 -2 -9 -3.9759 -16.6417
-3 -2 -8 -10.3995 12.9468
-3 -2 -7 3.9698 8.6961
-3 -2 -6 6.8548 7.7581
-3 -2 -5 19.3485 12.8661
-3 -2 -4 7.6918 -1.3699
-3 -2 -3 11.8281 -5.3917
-3 -2 -2 4.2725 3.8342
-3 -2 -1 -27.2530 -2.2624
-3 -1 -35 -3.5775 -0.4624
-3 -1 -34 0.5619 2.1776
-3 -1 -33 0.0521 0.5174
-3 -1 -32 0.5591 1.7895
-3 -1 -31 6.2419 -1.4199
-3 -1 -30 -1.2563 -5.2134
-3 -1 -29 -0.4169 0.1142
-3 -1 -28 -2.4430 -4.4991
-3 -1 -27 -8.0393 3.8267
-3 -1 -26 1.2899 5.3940
-3 -1 -25 0.7070 -0.1136
-3 -1 -24 0.4209 7.6432
-3 -1 -23 3.3900 -5.1406
-3 -1 -22 2.0360 -6.5997
-3 -1 -21 -0.3945 -1.2159
-3 -1 -20 -0.1236 -8.9694
-3 -1 -19 -3.7976 5.4123
-3 -1 -18 0.8517 12.4354
-3 -1 -17 6.9734 -1.3748
-3 -1 -16 -0.5490 -2.0742
-3 -1 -15 9.3916 -4.0881
-3 -1 -14 -5.9292 -17.3260
-3 -1 -13 -11.9412 9.2982
-3 -1 -12 -1.1022 12.0055
-3 -1 -11 -14.7986 4.2045
-3 -1 -10 3.6966 28.3568
-3 -1 -9 4.4589 -15.8945
-3 -1 -8 5.7862 -18.4241
-3 -1 -7 16.4266 -7.9857
-3 -1 -6 -0.6992 -32.6249
-3 -1 -5 -3.8983 13.8441
-3 -1 -4 3.0806 12.2822
-3 -1 -3 6.2791 9.2472
-3 -1 -2 -13.4885 13.5324
-3 -1 -1 -8.9538 -0.0637
-2 -30 -8 -0.2734 -2.1432
-2 -30 -7 2.8364 1.6341
-2 -30 -6 -1.4934 1.4199
-2 -30 -5 1.1185 2.6593
-2 -30 -4 1.5870 0.8140
-2 -30 -3 -2.6405 -1.8083
-2 -30 -2 0.7979 2.2460
-2 -30 -1 0.0419 -0.4770
-2 -29 -12 -3.0357 1.5484
-2 -29 -11 -2.7485 0.3702
-2 -29 -10 -0.2029 -2.6377
-2 -29 -9 2.6868 -1.0868
-2 -29 -8 3.1711 -0.9910
-2 -29 -7 1.0346 -0.1339
-2 -29 -6 1.1085 -0.2725
-2 -29 -5 -3.2040 2.1739
-2 -29 -4 0.6201 0.7615
-2 -29 -3 0.1678 -1.5335
-2 -29 -2 -1.0221 -3.4222
-2 -29 -1 2.9530 -0.3879
-2 -28 -15 2.1142 -0.6822
-2 -28 -14 -0.2710 0.2933
-2 -28 -13 -0.6369 1.2258
-2 -28 -12 -2.2162 0.9228
-2 -28 -11 -1.2583 1.6216
-2 -28 -10 1.9301 -3.4648
-2 -28 -9 -0.2610 -0.1429
-2 -28 -8 -2.1003 -2.4268
-2 -28 -7 1.1333 -1.9245
-2 -28 -6 -0.8155 0.1207
-2 -28 -5 -1.6611 0.2244
-2 -28 -4 2.7573 3.2521
-2 -28 -3 -0.9363 -0.0274
-2 -28 -2 -0.1719 2.7305
-2 -28 -1 -0.6865 0.5878
-2 -27 -17 2.2004 -0.9390
-2 -27 -16 -0.4047 -2.4702
-2 -27 -15 4.4200 0.0499
-2 -27 -14 0.1879 2.3142
-2 -27 -13 -1.1786 0.2741
-2 -27 -12 -4.9747 0.5122
-2 -27 -11 -3.1468 2.1967
-2 -27 -10 -1.0651 -1.3228
-2 -27 -9 -1.2751 -0.8122
-2 -27 -8 4.4074 -0.8175
-2 -27 -7 -0.2469 0.1100
-2 -27 -6 2.1851 0.1493
-2 -27 -5 0.6094 -0.3344
-2 -27 -4 0.2362 1.6035
-2 -27 -3 2.3525 1.1970
-2 -27 -2 -2.1030 -2.9946
-2 -27 -1 1.5770 -2.5700
-2 -26 -19 -2.2670 -1.5246
-2 -26 -18 -1.3953 1.9794
-2 -26 -17 0.1065 -2.0062
-2 -26 -16 1.2913 -0.3418
-2 -26 -15 1.6722 2.3784
-2 -26 -14 -0.2134 1.6494
-2 -26 -13 -0.1989 2.8369
-2 -26 -12 -0.2911 -0.8283
-2 -26 -11 -3.0509 3.4126
-2 -26 -10 1.2058 -2.1432
-2 -26 -9 2.5734 -0.5182
-2 -26 -8 -1.2279 1.1017
-2 -26 -7 -0.4877 -4.8483
-2 -26 -6 0.2962 -1.9742
-2 -26 -5 -3.8152 -3.4807
-2 -26 -4 0.3486 1.3924
-2 -26 -3 0.9951 1.5823
-2 -26 -2 -0.0794 2.8348
-2 -26 -1 -0.2285 2.5794
-2 -25 -21 0.6926 0.0177
-2 -25 -20 0.6327 1.4005
-2 -25 -19 -0.8589 1.1353
-2 -25 -18 -2.0789 -1.2843
-2 -25 -17 2.7862 1.9401
-2 -25 -16 0.9723 -0.0159
-2 -25 -15 3.5431 -2.3425
-2 -25 -14 3.4744 1.0294
-2 -25 -13 1.5470 0.6281
-2 -25 -12 -1.8621 -1.6474
-2 -25 -11 -4.6133 1.9264
-2 -25 -10 -0.3039 1.4160
-2 -25 -9 -5.9575 -1.1228
-2 -25 -8 0.7644 0.0266
-2 -25 -7 -0.4138 -0.1068
-2 -25 -6 -0.2236 0.9434
-2 -25 -5 3.7316 -0.1968
-2 -25 -4 -1.1120 0.0931
-2 -25 -3 3.7611 1.7631
-2 -25 -2 -0.1505 0.2786
-2 -25 -1 0.3142 -2.5572
-2 -24 -22 2.0094 -0.3194
-2 -24 -21 0.4148 -0.4225
-2 -24 -20 0.2207 -0.4484
-2 -24 -19 -0.0996 -1.5363
-2 -24 -18 -0.4391 -1.4575
-2 -24 -17 -0.9797 -1.3032
-2 -24 -16 1.1180 -3.2127
-2 -24 -15 0.8588 1.9101
-2 -24 -14 -0.7912 0.5211
-2 -24 -13 -1.1510 3.9091
-2 -24 -12 2.4975 -0.8847
-2 -24 -11 -2.4067 2.2333
-2 -24 -10 -1.5569 3.8434
-2 -24 -9 3.6966 -0.9186
-2 -24 -8 -0.0801 3.8278
-2 -24 -7 0.0084 -3.3242
-2 -24 -6 2.0715 -1.6246
-2 -24 -5 -3.4323 -4.2590
-2 -24 -4 -2.0374 -3.0482
-2 -24 -3 0.7292 1.1323
-2 -24 -2 -0.7177 -1.3484
-2 -24 -1 2.1428 2.8587
-2 -23 -23 -1.1569 0.9423
-2 -23 -22 -2.3640 0.3307
-2 -23 -21 1.5379 -1.8767
-2 -23 -20 -2.6965 -0.6230
-2 -23 -19 0.9907 1.4235
-2 -23 -18 -2.7029 -2.9218
-2 -23 -17 -0.7340 1.4762
-2 -23 -16 2.5853 5.3453
-2 -23 -15 0.6815 -1.4500
-2 -23 -14 2.5290 -1.5144
-2 -23 -13 3.1422 0.7448
-2 -23 -12 4.8390 -2.5837
-2 -23 -11 -1.6023 -1.6470
-2 -23 -10 1.5915 4.1591
-2 -23 -9 -5.1429 -0.6917
-2 -23 -8 -3.8361 -0.0892
-2 -23 -7 -0.1407 0.7787
-2 -23 -6 -3.9544 -1.7464
-2 -23 -5 4.6854 1.2141
-2 -23 -4 -2.9980 1.2451
-2 -23 -3 -0.1616 -1.3843
-2 -23 -2 2.2816 2.1891
-2 -23 -1 -2.0240 0.5821
-2 -22 -25 -0.3204 0.6656
-2 -22 -24 -0.8305 3.0699
-2 -22 -23 -1.4598 -0.7756
-2 -22 -22 3.1680 1.0355
-2 -22 -21 0.2077 0.0104
-2 -22 -20 -1.1951 1.2838
-2 -22 -19 0.2918 0.5627
-2 -22 -18 1.9963 -4.0544
-2 -22 -17 -0.5647 -0.5867
-2 -22 -16 0.3912 -3.9687
-2 -22 -15 0.4392 -0.4080
-2 -22 -14 -0.5717 -1.7170
-2 -22 -13 -3.1312 0.7164
-2 -22 -12 2.1026 0.9512
-2 -22 -11 1.2883 -1.6742
-2 -22 -10 -3.5574 5.3414
-2 -22 -9 2.7145 0.4814
-2 -22 -8 -0.6104 4.1535
-2 -22 -7 -0.5628 0.0839
-2 -22 -6 4.2261 0.8227
-2 -22 -5 -1.3161 1.0402
-2 -22 -4 -1.6340 -4.9906
-2 -22 -3 1.1503 0.9978
-2 -22 -2 -3.2028 -4.7641
-2 -22 -1 2.9381 -1.6179
-2 -21 -26 3.2811 -2.2607
-2 -21 -25 -1.5346 1.1639
-2 -21 -24 1.6598 -1.7569
-2 -21 -23 0.2196 0.2275
-2 -21 -22 -2.0259 2.5756
-2 -21 -21 2.4970 0.0092
-2 -21 -20 -4.5969 -2.5932
-2 -21 -19 -0.3447 -0.2139
-2 -21 -18 0.2718 -1.9639
-2 -21 -17 -3.9825 -2.8547
-2 -21 -16 0.9433 6.3823
-2 -21 -15 -1.7966 3.8208
-2 -21 -14 -1.1877 -1.4618
-2 -21 -13 1.3738 -0.1617
-2 -21 -12 6.7440 -1.1807
-2 -21 -11 2.5123 -5.2904
-2 -21 -10 3.4885 3.0458
-2 -21 -9 0.1239 1.6976
-2 -21 -8 -4.5797 -1.0861
-2 -21 -7 2.2111 3.3841
-2 -21 -6 -4.9346 -4.2696
-2 -21 -5 2.1042 -2.1878
-2 -21 -4 -0.5915 4.1813
-2 -21 -3 -5.9371 -3.3144
-2 -21 -2 1.6055 -0.3130
-2 -21 -1 -3.8277 4.1445
-2 -20 -27 1.3993 -0.2604
-2 -20 -26 -0.4608 -0.4955
-2 -20 -25 -1.0729 -1.0141
-2 -20 -24 -0.0135 0.4866
-2 -20 -23 -2.7581 -0.6635
-2 -20 -22 1.9123 2.0585
-2 -20 -21 0.7452 0.6833
-2 -20 -20 -0.3432 2.3212
-2 -20 -19 -0.6692 3.2141
-2 -20 -18 1.7667 -2.7956
-2 -20 -17 1.9163 2.1013
-2 -20 -16 0.2990 -1.4201
-2 -20 -15 -0.2190 -2.9196
-2 -20 -14 0.0310 -2.5747
-2 -20 -13 -2.4103 -4.3824
-2 -20 -12 -1.4158 1.4159
-2 -20 -11 3.2740 -1.8202
-2 -20 -10 -1.8770 1.4737
-2 -20 -9 0.7683 -0.5086
-2 -20 -8 -1.1565 1.3347
-2 -20 -7 -3.1251 2.5797
-2 -20 -6 3.1722 1.0117
-2 -20 -5 0.4734 6.4192
-2 -20 -4 -0.5247 -0.5879
-2 -20 -3 3.7366 0.5557
-2 -20 -2 -3.0312 -3.0238
-2 -20 -1 0.1438 -5.2219
-2 -19 -28 -1.5553 -0.5513
-2 -19 -27 -2.6139 1.2017
-2 -19 -26 2.4666 -1.2048
-2 -19 -25 -0.7443 -0.5332
-2 -19 -24 0.4182 -0.9856
-2 -19 -23 3.0281 0.0068
-2 -19 -22 -0.5850 1.2112
-2 -19 -21 2.5700 1.9726
-2 -19 -20 -2.7315 -0.2166
-2 -19 -19 -1.6699 -4.0536
-2 -19 -18 3.9359 -0.3331
-2 -19 -17 -1.8429 -4.4158
-2 -19 -16 -1.6145 0.8986
-2 -19 -15 -3.9756 7.1689
-2 -19 -14 -5.4376 2.0846
-2 -19 -13 -1.9550 0.0923
-2 -19 -12 3.4741 0.4257
-2 -19 -11 2.7251 -5.3015
-2 -19 -10 3.0503 -0.5038
-2 -19 -9 5.3583 2.9292
-2 -19 -8 -2.3970 -1.7386
-2 -19 -7 3.6247 5.3437
-2 -19 -6 0.0801 -0.8712
-2 -19 -5 -2.9750 -6.8530
-2 -19 -4 2.1676 2.5118
-2 -19 -3 -5.1355 -2.1928
-2 -19 -2 -1.7904 -4.6331
-2 -19 -1 -2.8332 4.6363
-2 -18 -29 -0.6367 1.4132
-2 -18 -28 -0.1921 0.4880
-2 -18 -27 0.1516 -0.0895
-2 -18 -26 1.0964 2.2959
-2 -18 -25 0.9781 -0.8898
-2 -18 -24 1.1504 -2.4417
-2 -18 -23 -2.9120 -2.5259
-2 -18 -22 -0.4422 1.2274
-2 -18 -21 -1.6457 0.0649
-2 -18 -20 0.0930 0.2598
-2 -18 -19 0.7009 3.5118
-2 -18 -18 -0.2664 -1.2565
-2 -18 -17 4.0315 4.6957
-2 -18 -16 2.0234 4.9962
-2 -18 -15 0.2841 -2.1467
-2 -18 -14 -1.2535 -0.4377
-2 -18 -13 -1.1664 -5.5969
-2 -18 -12 -1.5489 -2.4159
-2 -18 -11 1.3457 0.1310
-2 -18 -10 1.1007 -1.0888
-2 -18 -9 1.1275 -2.4562
-2 -18 -8 -1.1399 -3.3003
-2 -18 -7 -4.4791 2.7066
-2 -18 -6 -0.8411 0.4884
-2 -18 -5 -0.5531 4.9516
-2 -18 -4 -0.9831 5.4137
-2 -18 -3 4.3129 1.5440
-2 -18 -2 1.4240 0.4314
-2 -18 -1 -1.0637 -4.7743
-2 -17 -29 -0.0469 1.9771
-2 -17 -28 2.2791 1.3394
-2 -17 -27 -2.8560 -1.0542
-2 -17 -26 -1.3742 -1.4967
-2 -17 -25 -0.0592 -1.0647
-2 -17 -24 -1.9050 -1.5045
-2 -17 -23 3.3413 1.7088
-2 -17 -22 0.5919 0.7252
-2 -17 -21 0.8037 0.3487
-2 -17 -20 0.2314 4.3451
-2 -17 -19 -2.3541 -5.2582
-2 -17 -18 4.4448 -2.4785
-2 -17 -17 4.0793 -2.5545
-2 -17 -16 0.9679 -4.9617
-2 -17 -15 -1.6040 5.3260
-2 -17 -14 -6.1427 4.2690
-2 -17 -13 -5.7181 1.8168
-2 -17 -12 -2.5657 2.3184
-2 -17 -11 -1.2336 -3.9193
-2 -17 -10 -1.2308 -2.5291
-2 -17 -9 7.0629 3.4493
-2 -17 -8 2.7587 -2.4368
-2 -17 -7 2.3384 3.6666
-2 -17 -6 7.1051 5.9576
-2 -17 -5 -4.0816 -5.2163
-2 -17 -4 0.0027 -1.9480
-2 -17 -3 -0.5307 -0.9486
-2 -17 -2 -3.4071 -6.8693
-2 -17 -1 -1.0510 1.6154
-2 -16 -30 1.1743 -2.0471
-2 -16 -29 -2.4351 -0.4802
-2 -16 -28 -3.0968 1.7508
-2 -16 -27 -1.6865 -0.4404
-2 -16 -26 -0.2967 2.7136
-2 -16 -25 2.2334 1.8852
-2 -16 -24 3.6336 -1.0688
-2 -16 -23 -0.4189 -3.0420
-2 -16 -22 -0.5686 -1.4992
-2 -16 -21 -4.2061 -0.0428
-2 -16 -20 -3.2029 -3.3584
-2 -16 -19 0.6888 0.4923
-2 -16 -18 -1.8180 -0.8221
-2 -16 -17 4.2692 0.9515
-2 -16 -16 3.6038 7.6641
-2 -16 -15 3.0132 1.2097
-2 -16 -14 -0.7830 2.9844
-2 -16 -13 -4.5492 1.1365
-2 -16 -12 0.1872 -3.8320
-2 -16 -11 1.0670 -0.1671
-2 -16 -10 1.3420 -1.6748
-2 -16 -9 4.6404 -3.0619
-2 -16 -8 1.7320 -7.1497
-2 -16 -7 -4.4837 -0.9063
-2 -16 -6 -3.6139 0.5592
-2 -16 -5 -3.8811 0.7736
-2 -16 -4 -3.1278 6.7260
-2 -16 -3 1.8568 2.2360
-2 -16 -2 4.0206 6.1111
-2 -16 -1 3.1969 -0.6158
-2 -15 -31 1.6217 1.5401
-2 -15 -30 2.7889 1.8415
-2 -15 -29 -0.0053 0.7564
-2 -15 -28 2.6876 3.3745
-2 -15 -27 0.7036 0.1493
-2 -15 -26 -3.3457 -2.4673
-2 -15 -25 -0.2675 -0.7775
-2 -15 -24 -2.9769 -2.5131
-2 -15 -23 1.4505 1.4468
-2 -15 -22 1.2300 2.1689
-2 -15 -21 -2.8741 -1.6817
-2 -15 -20 2.1803 5.7726
-2 -15 -19 -2.2037 -1.1705
-2 -15 -18 -0.8710 -4.3987
-2 -15 -17 5.2680 -0.8427
-2 -15 -16 4.1466 -6.8268
-2 -15 -15 4.6329 0.7615
-2 -15 -14 1.7681 2.9180
-2 -15 -13 -3.6464 0.9201
-2 -15 -12 -6.7839 3.9298
-2 -15 -11 -4.8248 -2.1736
-2 -15 -10 -9.0138 -5.1374
-2 -15 -9 -0.5512 4.7693
-2 -15 -8 6.9412 -0.2451
-2 -15 -7 0.4202 -1.2346
-2 -15 -6 11.6470 9.1983
-2 -15 -5 2.1711 0.4749
-2 -15 -4 -2.2188 -3.3624
-2 -15 -3 3.2406 -0.0599
-2 -15 -2 -3.6222 -6.1992
-2 -15 -1 3.4200 -1.5649
-2 -14 -31 2.0668 0.1699
-2 -14 -30 3.6918 -1.2717
-2 -14 -29 0.3188 -2.6284
-2 -14 -28 -3.3421 1.0324
-2 -14 -27 -2.7812 0.7740
-2 -14 -26 -2.1806 0.8562
-2 -14 -25 0.6320 2.1183
-2 -14 -24 3.1273 2.0345
-2 -14 -23 2.6668 1.5524
-2 -14 -22 2.0708 -2.9512
-2 -14 -21 -3.5211 0.4780
-2 -14 -20 -4.8874 -3.1622
-2 -14 -19 -1.9225 -4.4557
-2 -14 -18 -3.5526 0.9486
-2 -14 -17 2.8506 -4.1613
-2 -14 -16 2.4678 1.7555
-2 -14 -15 3.9888 2.4213
-2 -14 -14 3.6437 1.9209
-2 -14 -13 -7.6161 6.9647
-2 -14 -12 -3.2913 1.8892
-2 -14 -11 1.9833 1.4417
-2 -14 -10 0.0358 -0.9083
-2 -14 -9 6.9540 0.0050
-2 -14 -8 9.0575 -7.0386
-2 -14 -7 -2.3898 -7.3932
-2 -14 -6 -3.2720 -1.8878
-2 -14 -5 -6.0756 -4.9627
-2 -14 -4 -7.9974 4.9166
-2 -14 -3 0.4438 -2.4733
-2 -14 -2 1.2458 7.5947
-2 -14 -1 6.9524 9.9424
-2 -13 -32 -3.9008 -3.4708
-2 -13 -31 -2.4336 -0.8714
-2 -13 -30 1.8676 2.7328
-2 -13 -29 1.8802 0.0873
-2 -13 -28 1.7174 1.9178
-2 -13 -27 3.5604 1.5978
-2 -13 -26 -1.8546 -1.6494
-2 -13 -25 -0.3809 0.0241
-2 -13 -24 -1.6429 -1.6219
-2 -13 -23 -1.1019 0.6970
-2 -13 -22 3.1164 2.7469
-2 -13 -21 -5.2051 -1.7504
-2 -13 -20 0.5586 2.1846
-2 -13 -19 0.4366 1.7494
-2 -13 -18 -6.0520 -1.9404
-2 -13 -17 0.6623 0.8268
-2 -13 -16 1.9130 -2.9639
-2 -13 -15 4.7532 -1.5382
-2 -13 -14 9.4746 0.2205
-2 -13 -13 6.0937 -1.4297
-2 -13 -12 -4.5139 1.2890
-2 -13 -11 -1.5121 -0.5474
-2 -13 -10 -9.1679 -7.4556
-2 -13 -9 -15.5016 2.0871
-2 -13 -8 3.5708 4.9334
-2 -13 -7 -4.4002 -2.7796
-2 -13 -6 6.6548 7.0884
-2 -13 -5 11.5209 2.7637
-2 -13 -4 -2.8995 -2.6382
-2 -13 -3 8.6491 1.7923
-2 -13 -2 -3.0152 -4.8267
-2 -13 -1 7.4028 -2.4384
-2 -12 -33 -1.3552 0.0843
-2 -12 -32 -0.0110 -1.3595
-2 -12 -31 0.3764 0.0403
-2 -12 -30 2.7327 -0.6299
-2 -12 -29 1.5445 -2.7876
-2 -12 -28 -0.3939 -1.1465
-2 -12 -27 -1.1100 0.9777
-2 -12 -26 -2.8428 -0.3200
-2 -12 -25 -0.0352 0.3828
-2 -12 -24 0.6945 0.3256
-2 -12 -23 2.4131 5.5909
-2 -12 -22 4.6164 0.6810
-2 -12 -21 -1.7966 0.9853
-2 -12 -20 -2.5388 2.2908
-2 -12 -19 -2.4586 -7.2900
-2 -12 -18 -4.8807 1.0469
-2 -12 -17 1.7849 -4.2470
-2 -12 -16 -0.0481 -6.3654
-2 -12 -15 1.1381 1.8441
-2 -12 -14 6.9671 -1.6642
-2 -12 -13 -4.9333 4.2186
-2 -12 -12 -7.2909 6.1168
-2 -12 -11 -0.9585 5.5457
-2 -12 -10 -3.3000 0.3294
-2 -12 -9 4.8588 4.3497
-2 -12 -8 14.7830 1.5612
-2 -12 -7 1.6603 -8.7000
-2 -12 -6 0.6046 -1.4185
-2 -12 -5 -2.3140 -11.8783
-2 -12 -4 -15.1730 -1.0694
-2 -12 -3 -0.3798 -7.2685
-2 -12 -2 -1.6619 -8.9479
-2 -12 -1 0.6728 17.7702
-2 -11 -33 2.0109 -0.1318
-2 -11 -32 -1.4755 -1.0183
-2 -11 -31 -3.5555 -1.6830
-2 -11 -30 -1.4947 1.3492
-2 -11 -29 1.1390 0.1897
-2 -11 -28 0.3422 0.5108
-2 -11 -27 3.9886 0.4362
-2 -11 -26 0.7435 -1.8665
-2 -11 -25 -0.8677 -0.3014
-2 -11 -24 1.8339 -0.4616
-2 -11 -23 -2.4965 1.5407
-2 -11 -22 4.2965 2.9800
-2 -11 -21 -1.3804 1.1070
-2 -11 -20 -3.3765 -1.1673
-2 -11 -19 1.1518 -1.9111
-2 -11 -18 -6.3229 0.4627
-2 -11 -17 -3.0803 1.2794
-2 -11 -16 -2.0831 2.3492
-2 -11 -15 -0.4405 2.6332
-2 -11 -14 7.0890 -1.2582
-2 -11 -13 13.0415 -0.8685
-2 -11 -12 2.7462 -1.8653
-2 -11 -11 2.8160 -3.7051
-2 -11 -10 3.7888 -5.3833
-2 -11 -9 -20.2281 -2.3169
-2 -11 -8 -3.5032 4.7915
-2 -11 -7 -6.1650 2.3697
-2 -11 -6 -10.3770 5.3550
-2 -11 -5 13.3236 0.0433
-2 -11 -4 -7.4791 -3.9162
-2 -11 -3 7.6355 3.0158
-2 -11 -2 3.1939 -3.9110
-2 -11 -1 0.0696 -2.3472
-2 -10 -33 -0.1299 0.0221
-2 -10 -32 -0.8324 -1.3873
-2 -10 -31 -1.6773 0.6135
-2 -10 -30 0.7325 -0.6423
-2 -10 -29 -0.3283 -1.1434
-2 -10 -28 0.1101 -0.8349
-2 -10 -27 2.1419 0.0768
-2 -10 -26 -2.2177 -1.4954
-2 -10 -25 -0.0598 -0.0162
-2 -10 -24 0.3774 -3.5803
-2 -10 -23 0.2174 1.4118
-2 -10 -22 4.8452 4.6298
-2 -10 -21 -1.1188 1.6694
-2 -10 -20 0.2575 9.0916
-2 -10 -19 0.8721 -2.9158
-2 -10 -18 -4.7513 -0.6701
-2 -10 -17 1.5019 -0.7142
-2 -10 -16 -0.8688 -12.4035
-2 -10 -15 -3.3941 -0.6171
-2 -10 -14 5.7795 -4.0268
-2 -10 -13 -0.4159 -2.6581
-2 -10 -12 -4.6796 6.3915
-2 -10 -11 -1.0398 7.4258
-2 -10 -10 -7.8555 1.6276
-2 -10 -9 -0.9756 2.3756
-2 -10 -8 12.9856 7.9962
-2 -10 -7 1.5350 -2.0681
-2 -10 -6 3.4705 9.7834
-2 -10 -5 7.7801 -5.8450
-2 -10 -4 -16.2175 -8.7188
-2 -10 -3 -4.8223 -1.2351
-2 -10 -2 0.5371 -33.8142
-2 -10 -1 -12.3733 3.6365
-2 -9 -34 -2.2192 1.7929
-2 -9 -33 1.2166 -0.5832
-2 -9 -32 -0.8521 1.3149
-2 -9 -31 -0.6779 -0.0415
-2 -9 -30 -1.1229 0.0242
-2 -9 -29 -0.6352 -0.1226
-2 -9 -28 -1.2842 0.9181
-2 -9 -27 1.1692 0.4661
-2 -9 -26 2.2419 -2.5465
-2 -9 -25 -2.1400 -2.6799
-2 -9 -24 3.5159 -1.4956
-2 -9 -23 -0.5259 2.0822
-2 -9 -22 2.1587 1.8786
-2 -9 -21 5.1498 4.1738
-2 -9 -20 -2.7029 1.4889
-2 -9 -19 -0.5042 -6.7338
-2 -9 -18 -4.9811 -0.7053
-2 -9 -17 -3.9237 0.2770
-2 -9 -16 -4.7285 1.8355
-2 -9 -15 -5.6846 8.7789
-2 -9 -14 0.0588 0.6157
-2 -9 -13 9.3281 0.0384
-2 -9 -12 11.1997 0.6514
-2 -9 -11 3.5922 -10.5345
-2 -9 -10 12.3614 -4.1461
-2 -9 -9 -7.4850 0.7777
-2 -9 -8 -5.8659 -1.6677
-2 -9 -7 3.3989 8.2031
-2 -9 -6 -19.6147 8.5698
-2 -9 -5 5.4943 -2.6298
-2 -9 -4 -12.6935 -4.7825
-2 -9 -3 -10.4897 -0.5892
-2 -9 -2 10.2430 -3.5295
-2 -9 -1 -15.8233 -1.3229
-2 -8 -34 2.8450 5.3868
-2 -8 -33 3.2496 1.7308
-2 -8 -32 0.7514 -2.6916
-2 -8 -31 -2.1477 0.6183
-2 -8 -30 -0.6725 -2.2702
-2 -8 -29 -1.4882 -0.9857
-2 -8 -28 -2.5132 1.8099
-2 -8 -27 2.7477 0.9218
-2 -8 -26 0.0378 -1.6373
-2 -8 -25 -0.3088 0.2443
-2 -8 -24 1.2220 -3.5226
-2 -8 -23 -0.8294 -5.8918
-2 -8 -22 2.7079 2.7236
-2 -8 -21 -2.0467 -0.2918
-2 -8 -20 0.1819 10.0712
-2 -8 -19 5.1651 6.6253
-2 -8 -18 -1.1431 -0.9158
-2 -8 -17 1.5348 6.9768
-2 -8 -16 0.8945 -10.7985
-2 -8 -15 -6.2857 -5.8220
-2 -8 -14 -0.6212 -4.9374
-2 -8 -13 -0.6630 -12.4786
-2 -8 -12 -1.0855 4.0076
-2 -8 -11 6.1793 6.6362
-2 -8 -10 -4.1902 2.9853
-2 -8 -9 -3.4234 -0.2689
-2 -8 -8 6.6182 0.6897
-2 -8 -7 -4.3060 -2.3194
-2 -8 -6 -0.0737 20.1172
-2 -8 -5 11.6915 16.5303
-2 -8 -4 -4.6149 -6.6060
-2 -8 -3 -7.8389 16.5841
-2 -8 -2 3.1937 -34.5133
-2 -8 -1 -14.3972 -27.8209
-2 -7 -34 -1.9680 2.6487
-2 -7 -33 0.4904 -0.6048
-2 -7 -32 -3.5774 1.3358
-2 -7 -31 -0.7134 1.9119
-2 -7 -30 1.8982 -0.4129
-2 -7 -29 -0.7179 -0.9108
-2 -7 -28 -0.1218 0.8333
-2 -7 -27 -2.4165 1.5021
-2 -7 -26 0.7318 -0.4924
-2 -7 -25 -1.7590 -3.6984
-2 -7 -24 0.7452 -4.0577
-2 -7 -23 2.9309 1.9127
-2 -7 -22 -0.0546 -0.1789
-2 -7 -21 6.5400 2.9218
-2 -7 -20 1.0516 6.5238
-2 -7 -19 0.3355 -6.5643
-2 -7 -18 -1.9153 -3.5885
-2 -7 -17 -3.5964 -0.2028
-2 -7 -16 -3.3486 -2.4945
-2 -7 -15 -9.1258 9.8632
-2 -7 -14 -5.6526 5.5218
-2 -7 -13 -2.8498 -0.8984
-2 -7 -12 11.0927 5.1809
-2 -7 -11 5.9587 -13.7158
-2 -7 -10 5.8275 -10.3841
-2 -7 -9 7.8998 7.7218
-2 -7 -8 -1.6653 -6.8299
-2 -7 -7 14.9052 9.5050
-2 -7 -6 -5.2173 14.2370
-2 -7 -5 0.0138 -4.4112
-2 -7 -4 -8.0013 2.5783
-2 -7 -3 -31.1844 -6.5876
-2 -7 -2 5.5468 -7.2321
-2 -7 -1 -23.1601 2.9138
-2 -6 -35 -2.1999 -3.2310
-2 -6 -34 0.1529 3.7624
-2 -6 -33 4.0511 5.9758
-2 -6 -32 3.1141 -1.5980
-2 -6 -31 -0.3126 1.2514
-2 -6 -30 -1.3571 -2.6048
-2 -6 -29 -1.1276 -3.3968
-2 -6 -28 -4.0782 2.3585
-2 -6 -27 -0.3888 1.7222
-2 -6 -26 1.5950 0.6015
-2 -6 -25 0.6669 0.2386
-2 -6 -24 1.9455 -0.7232
-2 -6 -23 0.8028 -7.3543
-2 -6 -22 0.8528 -1.2663
-2 -6 -21 -4.0919 -3.4140
-2 -6 -20 -3.1936 1.4846
-2 -6 -19 3.3054 12.8434
-2 -6 -18 3.6932 -1.0057
-2 -6 -17 4.8957 11.0073
-2 -6 -16 4.2359 2.7724
-2 -6 -15 -2.7406 -7.9073
-2 -6 -14 -6.8972 -0.6998
-2 -6 -13 -8.3982 -16.7506
-2 -6 -12 -4.4074 -2.6291
-2 -6 -11 8.5987 3.0256
-2 -6 -10 5.3261 -0.2971
-2 -6 -9 6.0854 1.5013
-2 -6 -8 4.6058 -9.4413
-2 -6 -7 -10.4570 -13.5558
-2 -6 -6 -3.0036 10.8477
-2 -6 -5 -0.9527 32.3237
-2 -6 -4 5.7322 6.9055
-2 -6 -3 3.3664 30.6879
-2 -6 -2 -0.7002 -2.6341
-2 -6 -1 2.0636 -44.2354
-2 -5 -35 3.5408 -5.3239
-2 -5 -34 0.2799 0.7734
-2 -5 -33 1.6042 0.0486
-2 -5 -32 -3.0503 0.4957
-2 -5 -31 -3.1833 3.2997
-2 -5 -30 2.9698 0.2652
-2 -5 -29 -0.8201 -1.4679
-2 -5 -28 2.7028 -0.0824
-2 -5 -27 -2.2232 -0.0104
-2 -5 -26 -3.8324 1.5345
-2 -5 -25 0.4146 -0.8851
-2 -5 -24 -3.5626 -5.3973
-2 -5 -23 3.1599 1.0045
-2 -5 -22 1.6751 -0.4907
-2 -5 -21 3.9795 -0.1241
-2 -5 -20 2.8109 8.3952
-2 -5 -19 0.6252 -3.0950
-2 -5 -18 2.4318 -5.3174
-2 -5 -17 -3.1380 -0.9070
-2 -5 -16 0.3688 -5.8483
-2 -5 -15 -4.6312 6.7529
-2 -5 -14 -2.9119 10.0290
-2 -5 -13 -10.9279 -0.9862
-2 -5 -12 -2.3932 7.4461
-2 -5 -11 5.7176 -9.8496
-2 -5 -10 -11.5211 -18.6237
-2 -5 -9 9.4001 8.8879
-2 -5 -8 4.7973 -8.8471
-2 -5 -7 14.1324 5.8356
-2 -5 -6 22.6997 19.5379
-2 -5 -5 5.0140 -11.6979
-2 -5 -4 3.7901 12.7847
-2 -5 -3 -29.4437 -4.4372
-2 -5 -2 -11.2858 -17.2421
-2 -5 -1 -17.6628 9.1048
-2 -4 -35 -2.6945 -2.7097
-2 -4 -34 -2.1876 -1.9082
-2 -4 -33 1.6783 5.1547
-2 -4 -32 3.0308 0.6666
-2 -4 -31 2.8717 1.3866
-2 -4 -30 -0.4392 0.3217
-2 -4 -29 -1.4095 -3.6230
-2 -4 -28 -3.0721 0.7799
-2 -4 -27 -3.6746 0.0532
-2 -4 -26 -0.1730 3.0936
-2 -4 -25 1.9633 1.0025
-2 -4 -24 1.6351 0.3647
-2 -4 -23 4.0456 -3.2633
-2 -4 -22 3.0028 -3.6866
-2 -4 -21 -4.6195 -2.3483
-2 -4 -20 -4.4977 -8.4761
-2 -4 -19 -5.2040 9.3577
-2 -4 -18 -0.4721 1.6342
-2 -4 -17 10.4867 3.2767
-2 -4 -16 7.5641 13.1174
-2 -4 -15 4.8776 -4.5168
-2 -4 -14 -1.9944 4.1846
-2 -4 -13 -16.4083 -6.9763
-2 -4 -12 -12.1861 -1.6590
-2 -4 -11 1.3196 2.5532
-2 -4 -10 2.9423 -6.4978
-2 -4 -9 19.3621 2.9996
-2 -4 -8 13.5495 -15.8442
-2 -4 -7 -14.2763 -20.9956
-2 -4 -6 1.9675 -10.8580
-2 -4 -5 -17.0570 18.8339
-2 -4 -4 -7.7415 22.3008
-2 -4 -3 24.9840 29.3277
-2 -4 -2 -5.1197 27.5239
-2 -4 -1 19.6055 -29.0394
-2 -3 -35 1.6506 -3.8477
-2 -3 -34 1.0902 -1.0896
-2 -3 -33 1.1399 -0.8184
-2 -3 -32 -0.3114 -1.1955
-2 -3 -31 -3.1948 4.0317
-2 -3 -30 2.5156 2.3613
-2 -3 -29 -0.9462 -1.0412
-2 -3 -28 3.6813 0.5064
-2 -3 -27 2.7264 -2.8184
-2 -3 -26 -7.1200 -0.6995
-2 -3 -25 1.2793 2.4573
-2 -3 -24 -5.7175 -3.6707
-2 -3 -23 -2.6047 -0.4202
-2 -3 -22 4.5527 -0.3397
-2 -3 -21 1.7913 -0.9711
-2 -3 -20 4.4609 8.0472
-2 -3 -19 0.7353 -0.3593
-2 -3 -18 2.4752 -4.5919
-2 -3 -17 -2.4753 -1.4783
-2 -3 -16 -0.9558 -8.1822
-2 -3 -15 -0.8096 3.1382
-2 -3 -14 9.2942 11.7066
-2 -3 -13 1.0463 -0.5744
-2 -3 -12 -12.6250 6.9809
-2 -3 -11 5.8242 -2.5331
-2 -3 -10 -28.0198 -19.7771
-2 -3 -9 -11.1509 5.6925
-2 -3 -8 6.8966 -7.5412
-2 -3 -7 -5.4566 -0.0703
-2 -3 -6 40.2129 25.4070
-2 -3 -5 22.5087 -19.7736
-2 -3 -4 8.6809 7.2345
-2 -3 -3 -3.7877 4.6200
-2 -3 -2 -23.6951 -28.5144
-2 -3 -1 -17.2315 11.8115
-2 -2 -35 -2.9841 0.3731
-2 -2 -34 -3.6497 -2.9142
-2 -2 -33 0.0454 0.3246
-2 -2 -32 -0.2463 0.9763
-2 -2 -31 3.7638 -0.5781
-2 -2 -30 3.2398 1.5426
-2 -2 -29 -1.9691 -0.9729
-2 -2 -28 -1.7299 0.0082
-2 -2 -27 -3.3560 -2.4187
-2 -2 -26 -4.0958 3.5432
-2 -2 -25 1.9690 3.6713
-2 -2 -24 -0.1519 -0.2695
-2 -2 -23 4.0828 2.0814
-2 -2 -22 8.1654 -4.4300
-2 -2 -21 -2.8892 -0.1483
-2 -2 -20 -0.5507 -8.5427
-2 -2 -19 -7.8858 -2.3211
-2 -2 -18 -14.1562 5.4287
-2 -2 -17 9.9037 -3.3959
-2 -2 -16 10.1199 8.5038
-2 -2 -15 6.0966 -1.5426
-2 -2 -14 11.8072 2.3079
-2 -2 -13 -13.6683 0.3129
-2 -2 -12 -17.9478 6.0469
-2 -2 -11 -2.9562 13.8656
-2 -2 -10 -11.8101 -6.1240
-2 -2 -9 17.9111 9.1546
-2 -2 -8 29.1469 -16.4396
-2 -2 -7 -12.5038 -22.7835
-2 -2 -6 7.5257 -17.5635
-2 -2 -5 -16.5012 -18.0750
-2 -2 -4 -40.9231 23.7162
-2 -2 -3 28.9303 23.7365
-2 -2 -2 -0.3899 25.9003
-2 -2 -1 18.0796 -1.6326
-2 -1 -35 0.4221 -1.3283
-2 -1 -34 0.4874 -0.6084
-2 -1 -33 -0.1870 -0.8401
-2 -1 -32 0.1107 -4.0952
-2 -1 -31 -2.2966 2.2061
-2 -1 -30 1.1009 4.6568
-2 -1 -29 -0.5027 -0.3858
-2 -1 -28 1.9435 2.6507
-2 -1 -27 8.4485 -2.1117
-2 -1 -26 -3.8024 -5.0699
-2 -1 -25 0.7826 1.9308
-2 -1 -24 -3.2697 -0.8841
-2 -1 -23 -10.3724 -0.3627
-2 -1 -22 2.8160 -0.8274
-2 -1 -21 -0.0109 -0.6532
-2 -1 -20 3.1811 7.6203
-2 -1 -19 4.6402 0.1346
-2 -1 -18 0.1778 -3.3378
-2 -1 -17 -1.3435 -0.3762
-2 -1 -16 -2.1124 -9.2310
-2 -1 -15 -7.3702 0.8197
-2 -1 -14 8.4872 11.9165
-2 -1 -13 22.8537 -0.7647
-2 -1 -12 -6.4887 4.3500
-2 -1 -11 13.4893 0.5990
-2 -1 -10 -17.2653 -16.2191
-2 -1 -9 -38.6163 2.4934
-2 -1 -8 2.8346 -3.1051
-2 -1 -7 -31.0092 -1.6437
-2 -1 -6 21.9090 30.7809
-2 -1 -5 43.2251 -11.4714
-2 -1 -4 3.8667 -10.1255
-2 -1 -3 21.8191 4.8361
-2 -1 -2 -13.0623 -35.1687
-2 -1 -1 -27.2075 6.2882
-1 -31 -4 -2.8476 -1.0260
-1 -31 -3 -1.8124 -1.5175
-1 -31 -2 2.3947 -1.9483
-1 -31 -1 1.0748 0.9840
-1 -30 -10 -1.4102 0.7072
-1 -30 -9 -2.5299 -0.3532
-1 -30 -8 0.0631 -0.5839
-1 -30 -7 3.0909 -0.8323
-1 -30 -6 0.6242 0.1225
-1 -30 -5 -0.5239 0.5135
-1 -30 -4 -3.0874 1.2561
-1 -30 -3 -0.4790 1.3044
-1 -30 -2 -0.4623 -0.2495
-1 -30 -1 -0.2355 0.0540
-1 -29 -13 -1.3983 -1.8514
-1 -29 -12 -1.8417 0.8757
-1 -29 -11 -3.8707 -0.1357
-1 -29 -10 -0.5039 0.1456
-1 -29 -9 -0.5656 -1.9003
-1 -29 -8 -0.1510 0.2721
-1 -29 -7 4.5174 0.7398
-1 -29 -6 1.4525 1.3160
-1 -29 -5 0.7872 2.1982
-1 -29 -4 0.0736 0.0871
-1 -29 -3 -4.0294 0.4641
-1 -29 -2 -0.4701 -2.9254
-1 -29 -1 1.8765 -0.0617
-1 -28 -16 1.3171 -0.6724
-1 -28 -15 -2.0301 3.0311
-1 -28 -14 1.0381 1.6800
-1 -28 -13 -0.2671 0.8767
-1 -28 -12 1.0276 0.2178
-1 -28 -11 -1.1950 -1.6693
-1 -28 -10 -0.8782 1.7548
-1 -28 -9 0.1512 1.0791
-1 -28 -8 -2.2772 -0.7084
-1 -28 -7 2.3769 -1.3826
-1 -28 -6 1.8422 -3.1263
-1 -28 -5 2.0005 -0.6748
-1 -28 -4 -1.7014 0.8233
-1 -28 -3 -1.5195 1.2380
-1 -28 -2 -0.2961 0.7831
-1 -28 -1 -2.3671 0.4223
-1 -27 -18 -1.5961 -2.3110
-1 -27 -17 0.3645 1.8200
-1 -27 -16 2.0425 -1.9498
-1 -27 -15 3.0882 2.5361
-1 -27 -14 0.8971 2.2697
-1 -27 -13 1.0236 0.3612
-1 -27 -12 1.3590 1.9396
-1 -27 -11 -1.0522 -2.1988
-1 -27 -10 -1.3904 0.7946
-1 -27 -9 -1.3326 -1.9665
-1 -27 -8 -5.3384 -2.3951
-1 -27 -7 0.5230 0.9944
-1 -27 -6 3.1669 -0.3328
-1 -27 -5 0.0882 2.3025
-1 -27 -4 3.0911 0.0701
-1 -27 -3 -1.9127 3.4412
-1 -27 -2 -2.1779 -0.0617
-1 -27 -1 2.0456 -0.7141
-1 -26 -20 -0.4306 2.4065
-1 -26 -19 1.2910 -2.4068
-1 -26 -18 -0.0051 -0.9806
-1 -26 -17 1.4290 -2.7672
-1 -26 -16 1.7646 -2.0897
-1 -26 -15 -0.5651 0.7714
-1 -26 -14 1.1263 1.8127
-1 -26 -13 -1.3261 -0.8751
-1 -26 -12 1.3409 -0.8404
-1 -26 -11 0.0885 0.1871
-1 -26 -10 -4.2142 0.7392
-1 -26 -9 1.9499 4.4169
-1 -26 -8 -1.8366 1.6226
-1 -26 -7 -0.6761 0.7237
-1 -26 -6 1.0016 -1.6396
-1 -26 -5 3.0257 -2.9271
-1 -26 -4 3.1725 -2.0040
-1 -26 -3 -1.2525 -1.5714
-1 -26 -2 1.7506 0.1564
-1 -26 -1 -2.6158 -1.0287
-1 -25 -21 0.1853 0.0477
-1 -25 -20 1.2920 -0.9142
-1 -25 -19 -2.6722 -1.6689
-1 -25 -18 -2.5306 -2.3848
-1 -25 -17 0.1247 -0.0367
-1 -25 -16 -2.2258 0.2160
-1 -25 -15 0.7660 -0.1168
-1 -25 -14 -0.6704 0.0902
-1 -25 -13 1.5852 1.0696
-1 -25 -12 3.6397 5.4696
-1 -25 -11 3.6396 -1.0418
-1 -25 -10 0.8900 -0.1432
-1 -25 -9 0.1804 0.9104
-1 -25 -8 -2.5964 -4.2178
-1 -25 -7 -5.0017 0.2183
-1 -25 -6 1.0621 -2.6990
-1 -25 -5 -2.1457 0.9452
-1 -25 -4 0.4569 -1.1455
-1 -25 -3 0.5375 1.0785
-1 -25 -2 -2.1334 3.9455
-1 -25 -1 2.5428 -1.0102
-1 -24 -23 0.6510 -1.2878
-1 -24 -22 -1.1173 -0.3848
-1 -24 -21 -2.3325 0.9575
-1 -24 -20 -2.0403 3.3759
-1 -24 -19 -0.4785 -0.2622
-1 -24 -18 3.4191 0.5640
-1 -24 -17 0.2339 -0.1843
-1 -24 -16 -0.1797 -0.2023
-1 -24 -15 1.5355 -1.8342
-1 -24 -14 2.2311 -1.1454
-1 -24 -13 -0.2845 -0.9501
-1 -24 -12 -0.0763 -4.3370
-1 -24 -11 2.7329 1.4214
-1 -24 -10 -4.4633 -2.1366
-1 -24 -9 0.0186 2.2636
-1 -24 -8 -0.2600 4.5172
-1 -24 -7 -2.5609 2.1600
-1 -24 -6 -0.6474 4.4817
-1 -24 -5 -1.4774 0.0661
-1 -24 -4 5.7777 -2.3911
-1 -24 -3 0.0661 -4.2239
-1 -24 -2 2.3882 -1.9180
-1 -24 -1 1.3058 -3.5960
-1 -23 -24 -0.4342 -0.9110
-1 -23 -23 0.6216 3.0752
-1 -23 -22 0.8067 1.9668
-1 -23 -21 -0.3926 2.0374
-1 -23 -20 0.9493 -3.6505
-1 -23 -19 1.7669 -1.6344
-1 -23 -18 -0.3651 0.5333
-1 -23 -17 1.4207 -3.1391
-1 -23 -16 -4.4026 0.5688
-1 -23 -15 -3.3393 -0.1693
-1 -23 -14 -4.0245 -2.8287
-1 -23 -13 -0.8748 -0.7697
-1 -23 -12 2.5542 5.1129
-1 -23 -11 4.5558 2.0618
-1 -23 -10 4.4086 -0.2577
-1 -23 -9 0.3878 3.4074
-1 -23 -8 4.5294 -2.9596
-1 -23 -7 -3.4201 1.0050
-1 -23 -6 -1.4407 -2.8767
-1 -23 -5 -0.8953 -1.4720
-1 -23 -4 -4.7056 0.8401
-1 -23 -3 0.9949 -4.7073
-1 -23 -2 -2.0591 3.0098
-1 -23 -1 0.4943 -0.9659
-1 -22 -25 1.4254 -1.3973
-1 -22 -24 1.4437 0.0171
-1 -22 -23 2.3456 -2.2976
-1 -22 -22 -1.9140 1.1163
-1 -22 -21 -2.1084 -0.8980
-1 -22 -20 -1.0162 -0.2376
-1 -22 -19 -4.4408 1.4307
-1 -22 -18 3.4324 1.6900
-1 -22 -17 0.8816 1.6913
-1 -22 -16 -3.5494 4.3103
-1 -22 -15 2.0295 0.2220
-1 -22 -14 2.7203 -4.4603
-1 -22 -13 1.6648 0.6754
-1 -22 -12 -0.2100 -5.8242
-1 -22 -11 2.2910 0.0401
-1 -22 -10 -1.1442 -2.2965
-1 -22 -9 -0.7404 -3.9278
-1 -22 -8 0.6786 3.5038
-1 -22 -7 -2.6247 -0.2003
-1 -22 -6 1.2554 6.7473
-1 -22 -5 -5.7439 4.4474
-1 -22 -4 0.5369 0.2795
-1 -22 -3 1.2315 -1.0550
-1 -22 -2 -0.0195 -3.0528
-1 -22 -1 4.6131 -2.1356
-1 -21 -26 -0.1219 0.2056
-1 -21 -25 -0.6982 -1.9497
-1 -21 -24 1.9729 -1.6516
-1 -21 -23 -0.2461 2.7361
-1 -21 -22 -0.2575 1.2576
-1 -21 -21 0.2156 4.7082
-1 -21 -20 -2.4229 -2.6238
-1 -21 -19 3.3353 -3.8910
-1 -21 -18 3.9555 4.0254
-1 -21 -17 3.4193 -2.1145
-1 -21 -16 -1.2782 -1.1596
-1 -21 -15 -3.9773 0.8025
-1 -21 -14 -5.9125 -3.9387
-1 -21 -13 -4.3554 -2.9915
-1 -21 -12 -1.6945 1.4646
-1 -21 -11 0.4089 2.2636
-1 -21 -10 5.9942 0.4651
-1 -21 -9 -0.8554 4.0409
-1 -21 -8 6.9008 -1.5290
-1 -21 -7 2.3013 1.2899
-1 -21 -6 -3.9920 1.6873
-1 -21 -5 3.8459 -3.3870
-1 -21 -4 -5.6614 3.5250
-1 -21 -3 0.1191 -4.6519
-1 -21 -2 2.6224 -2.5132
-1 -21 -1 -3.1895 -1.7131
-1 -20 -27 -0.8463 1.0382
-1 -20 -26 -1.5350 0.1511
-1 -20 -25 0.1235 0.1658
-1 -20 -24 1.0864 0.9612
-1 -20 -23 4.0067 -2.9749
-1 -20 -22 -0.6957 1.0017
-1 -20 -21 -2.8729 -0.6550
-1 -20 -20 2.3970 -5.0056
-1 -20 -19 -4.5882 -0.0478
-1 -20 -18 0.7092 2.5125
-1 -20 -17 2.4648 1.7798
-1 -20 -16 -5.4501 5.4499
-1 -20 -15 -0.6330 4.5905
-1 -20 -14 1.0282 -3.6213
-1 -20 -13 1.8305 1.8603
-1 -20 -12 2.2719 -2.5537
-1 -20 -11 0.5333 -2.2464
-1 -20 -10 0.3187 -0.2485
-1 -20 -9 -0.1941 -6.3833
-1 -20 -8 2.0067 0.9367
-1 -20 -7 -1.6433 -3.2382
-1 -20 -6 3.0896 2.2093
-1 -20 -5 -2.0103 4.7472
-1 -20 -4 -6.4307 -0.5122
-1 -20 -3 -1.3996 4.0731
-1 -20 -2 -2.2740 -1.4043
-1 -20 -1 4.2865 0.3403
-1 -19 -28 -2.0817 0.8551
-1 -19 -27 -0.7447 0.5411
-1 -19 -26 -0.9394 -0.8369
-1 -19 -25 -1.9961 -0.7149
-1 -19 -24 3.6990 -2.3612
-1 -19 -23 0.6897 1.8008
-1 -19 -22 -2.9546 -0.3946
-1 -19 -21 0.9357 3.5921
-1 -19 -20 -4.3243 1.4913
-1 -19 -19 0.7590 -5.7216
-1 -19 -18 6.4577 2.3269
-1 -19 -17 3.3789 1.9019
-1 -19 -16 4.0438 0.0504
-1 -19 -15 0.7473 2.2340
-1 -19 -14 -4.1473 -2.3218
-1 -19 -13 -3.9358 -3.7742
-1 -19 -12 -5.1154 -2.3423
-1 -19 -11 -6.5297 -0.2285
-1 -19 -10 4.1633 -0.1267
-1 -19 -9 -0.3644 2.4267
-1 -19 -8 3.0201 0.7425
-1 -19 -7 6.9154 -1.0922
-1 -19 -6 -6.1666 5.8130
-1 -19 -5 4.1999 -0.3665
-1 -19 -4 -0.7816 1.9929
-1 -19 -3 -3.0094 0.4153
-1 -19 -2 8.4086 -4.3416
-1 -19 -1 -1.9180 -3.7190
-1 -18 -29 2.2021 1.0725
-1 -18 -28 -0.6417 -0.9614
-1 -18 -27 0.9097 -0.8643
-1 -18 -26 -0.0215 -1.1334
-1 -18 -25 -2.0815 -0.1362
-1 -18 -24 -1.2184 3.5972
-1 -18 -23 2.3243 0.3562
-1 -18 -22 2.2555 0.7376
-1 -18 -21 -3.1925 -0.2151
-1 -18 -20 2.6852 -7.3419
-1 -18 -19 -1.1441 -4.2304
-1 -18 -18 -1.1576 -0.3494
-1 -18 -17 4.4506 1.6331
-1 -18 -16 -2.9545 3.9477
-1 -18 -15 -2.4754 5.0353
-1 -18 -14 -1.8769 0.8388
-1 -18 -13 -1.9626 1.9483
-1 -18 -12 3.7105 1.4752
-1 -18 -11 0.2811 -2.7618
-1 -18 -10 -0.1896 1.0052
-1 -18 -9 -0.1851 -3.3917
-1 -18 -8 2.7266 0.0293
-1 -18 -7 2.2826 -1.8033
-1 -18 -6 1.2471 -3.5173
-1 -18 -5 3.4228 0.5946
-1 -18 -4 -5.1512 -4.5251
-1 -18 -3 -4.4920 4.2486
-1 -18 -2 -4.9114 2.1516
-1 -18 -1 0.6299 1.6746
-1 -17 -30 1.7239 1.4875
-1 -17 -29 0.3122 -1.1479
-1 -17 -28 -1.7020 -1.1811
-1 -17 -27 -1.9160 2.9188
-1 -17 -26 -0.1528 -0.8623
-1 -17 -25 -1.9313 0.6047
-1 -17 -24 2.7953 -1.1020
-1 -17 -23 3.5072 -0.2652
-1 -17 -22 -4.5093 -0.2983
-1 -17 -21 -0.1562 -0.2624
-1 -17 -20 -4.5925 4.0217
-1 -17 -19 -4.2606 -3.1779
-1 -17 -18 5.7573 -3.3366
-1 -17 -17 0.6119 0.8597
-1 -17 -16 5.6858 1.7597
-1 -17 -15 7.6608 4.5962
-1 -17 -14 -0.3357 1.3563
-1 -17 -13 -0.2506 -0.9983
-1 -17 -12 -2.5331 -2.4738
-1 -17 -11 -10.3281 -2.5546
-1 -17 -10 -1.8013 -2.2019
-1 -17 -9 1.9675 -3.5316
-1 -17 -8 -2.2556 1.8921
-1 -17 -7 6.7460 -2.1921
-1 -17 -6 -4.4258 4.4626
-1 -17 -5 -1.5419 6.0378
-1 -17 -4 4.7689 -0.0847
-1 -17 -3 -3.5755 3.4635
-1 -17 -2 8.9728 -1.0056
-1 -17 -1 2.0911 -0.5429
-1 -16 -31 -0.8352 2.0884
-1 -16 -30 -2.5230 2.6699
-1 -16 -29 2.3962 2.4691
-1 -16 -28 -0.8559 1.1356
-1 -16 -27 0.3327 -2.3028
-1 -16 -26 3.6563 -2.7303
-1 -16 -25 -1.5611 -2.6212
-1 -16 -24 -2.8269 2.9729
-1 -16 -23 -2.0242 4.8481
-1 -16 -22 2.3845 3.6458
-1 -16 -21 -0.7401 2.1543
-1 -16 -20 -0.2406 -5.3760
-1 -16 -19 1.1530 -5.4050
-1 -16 -18 -2.3244 -6.6366
-1 -16 -17 4.3001 -2.0580
-1 -16 -16 1.5185 2.7812
-1 -16 -15 -1.2492 1.8421
-1 -16 -14 0.0764 4.8672
-1 -16 -13 -5.2776 1.8664
-1 -16 -12 0.6116 2.4102
-1 -16 -11 0.1149 -1.6427
-1 -16 -10 -2.2447 -0.7403
-1 -16 -9 -1.7825 1.2445
-1 -16 -8 0.9250 1.8781
-1 -16 -7 7.7589 2.9081
-1 -16 -6 0.8364 -3.0810
-1 -16 -5 4.5732 -3.4933
-1 -16 -4 0.5633 -11.8106
-1 -16 -3 -0.9233 -1.8404
-1 -16 -2 -2.9812 3.0974
-1 -16 -1 -6.3931 1.8561
-1 -15 -31 1.5438 -2.4668
-1 -15 -30 2.2257 1.5165
-1 -15 -29 0.7281 0.8091
-1 -15 -28 -0.4833 -3.3602
-1 -15 -27 -2.2439 2.6829
-1 -15 -26 -0.0319 0.8209
-1 -15 -25 0.1001 0.4078
-1 -15 -24 0.0360 1.7278
-1 -15 -23 5.0306 -1.8606
-1 -15 -22 -2.3559 1.0328
-1 -15 -21 -0.9017 -1.8210
-1 -15 -20 -1.9903 1.8343
-1 -15 -19 -8.3282 2.2203
-1 -15 -18 1.6577 -4.5299
-1 -15 -17 -2.3479 -3.1822
-1 -15 -16 1.2753 -1.5442
-1 -15 -15 9.3930 3.4558
-1 -15 -14 3.5861 3.8254
-1 -15 -13 2.3281 2.4426
-1 -15 -12 2.8896 2.3586
-1 -15 -11 -4.6312 0.0762
-1 -15 -10 -6.5438 -1.0100
-1 -15 -9 2.3166 -10.0270
-1 -15 -8 -4.6419 -2.1882
-1 -15 -7 2.1500 -3.2473
-1 -15 -6 -1.6746 -2.5187
-1 -15 -5 -9.0171 9.6541
-1 -15 -4 5.4221 -0.8579
-1 -15 -3 -2.5719 4.2932
-1 -15 -2 9.0953 1.6789
-1 -15 -1 7.6282 4.9389
-1 -14 -32 0.8870 -3.7045
-1 -14 -31 0.5654 -1.0314
-1 -14 -30 -2.2041 2.4339
-1 -14 -29 1.7972 2.1854
-1 -14 -28 0.9329 2.6329
-1 -14 -27 -1.1075 -0.9445
-1 -14 -26 4.0708 -3.2524
-1 -14 -25 0.8460 -4.0488
-1 -14 -24 -1.0498 -0.6129
-1 -14 -23 -3.2180 4.5697
-1 -14 -22 -1.5835 5.6540
-1 -14 -21 1.7380 5.6055
-1 -14 -20 -2.3988 -0.5370
-1 -14 -19 1.2769 -0.6096
-1 -14 -18 -1.9937 -8.1304
-1 -14 -17 0.5744 -7.8587
-1 -14 -16 4.1076 0.6927
-1 -14 -15 -1.1726 -2.5848
-1 -14 -14 4.2858 6.7823
-1 -14 -13 -1.1863 2.5034
-1 -14 -12 -3.1482 -0.5849
-1 -14 -11 -0.4283 1.1442
-1 -14 -10 -3.2193 -4.4473
-1 -14 -9 -4.8781 0.4060
-1 -14 -8 -5.7362 6.0871
-1 -14 -7 7.6389 8.1223
-1 -14 -6 1.2686 2.0080
-1 -14 -5 4.3860 3.5727
-1 -14 -4 5.6200 -16.4390
-1 -14 -3 1.8609 -16.3461
-1 -14 -2 9.6138 -0.2504
-1 -14 -1 -7.4264 -9.9393
-1 -13 -33 0.6345 1.2100
-1 -13 -32 0.6890 0.8286
-1 -13 -31 0.6090 -2.7068
-1 -13 -30 0.7135 -1.9449
-1 -13 -29 0.3790 0.5167
-1 -13 -28 -0.3041 -2.6265
-1 -13 -27 -1.2694 1.1873
-1 -13 -26 0.1368 2.5703
-1 -13 -25 3.2020 -0.6623
-1 -13 -24 -0.5711 3.1641
-1 -13 -23 2.6622 -1.7609
-1 -13 -22 0.2847 0.9338
-1 -13 -21 -1.6697 1.1843
-1 -13 -20 2.0523 -2.1281
-1 -13 -19 -5.5454 3.9366
-1 -13 -18 -2.1821 -0.6557
-1 -13 -17 -2.9561 -2.9785
-1 -13 -16 -2.9737 -4.5212
-1 -13 -15 2.2999 -2.2097
-1 -13 -14 2.8373 2.4567
-1 -13 -13 3.2344 2.6997
-1 -13 -12 2.7392 5.6566
-1 -13 -11 5.6144 4.2984
-1 -13 -10 -1.5206 6.0669
-1 -13 -9 2.0555 -7.1953
-1 -13 -8 -3.3055 -5.7507
-1 -13 -7 -2.3611 -3.0281
-1 -13 -6 0.1869 -13.4796
-1 -13 -5 -16.0708 6.5185
-1 -13 -4 1.0768 -2.5990
-1 -13 -3 -5.8378 0.2253
-1 -13 -2 2.8911 4.6026
-1 -13 -1 16.8135 -1.4832
-1 -12 -33 -1.2345 -0.4029
-1 -12 -32 -1.4312 -1.3997
-1 -12 -31 -0.7927 -2.5603
-1 -12 -30 -1.9627 0.5008
-1 -12 -29 0.7458 1.4281
-1 -12 -28 2.0875 1.3786
-1 -12 -27 -0.0444 0.9182
-1 -12 -26 2.6104 -2.9715
-1 -12 -25 1.0197 -3.7061
-1 -12 -24 0.8604 -2.5366
-1 -12 -23 1.1584 0.6423
-1 -12 -22 -4.1177 3.8187
-1 -12 -21 1.1973 6.3262
-1 -12 -20 -2.4626 2.3385
-1 -12 -19 -0.9000 4.7946
-1 -12 -18 0.6049 -1.9704
-1 -12 -17 -3.6972 -8.8532
-1 -12 -16 4.2351 -0.5089
-1 -12 -15 -0.5188 -7.5039
-1 -12 -14 3.5777 4.5551
-1 -12 -13 5.7077 5.5752
-1 -12 -12 -2.9207 -6.1911
-1 -12 -11 -0.8299 3.5965
-1 -12 -10 -1.1645 -4.4181
-1 -12 -9 -2.7815 -7.5692
-1 -12 -8 -10.4594 6.4529
-1 -12 -7 -0.1244 12.4598
-1 -12 -6 -3.1194 4.3459
-1 -12 -5 -1.3611 17.6105
-1 -12 -4 10.0089 -1.3327
-1 -12 -3 -5.0576 -28.9308
-1 -12 -2 16.7350 -3.8784
-1 -12 -1 7.0071 -27.6385
-1 -11 -34 -3.7547 1.3268
-1 -11 -33 1.1048 1.5941
-1 -11 -32 0.5063 2.4694
-1 -11 -31 0.4237 0.4292
-1 -11 -30 0.4609 -2.3535
-1 -11 -29 -1.0021 -2.1424
-1 -11 -28 -2.5531 -2.8960
-1 -11 -27 -1.3978 -0.3482
-1 -11 -26 -0.5932 2.8437
-1 -11 -25 3.7401 -1.4167
-1 -11 -24 3.4962 2.3035
-1 -11 -23 0.8213 0.4425
-1 -11 -22 1.2974 -1.4576
-1 -11 -21 -2.7769 4.4348
-1 -11 -20 1.0730 -1.9668
-1 -11 -19 1.0654 1.2285
-1 -11 -18 -1.2107 2.0914
-1 -11 -17 -1.6360 -0.8775
-1 -11 -16 -0.9544 -2.9125
-1 -11 -15 -4.6971 -6.3629
-1 -11 -14 -5.2025 -1.6786
-1 -11 -13 2.7853 0.5191
-1 -11 -12 -4.0069 5.9649
-1 -11 -11 6.8956 3.4333
-1 -11 -10 10.7730 8.1228
-1 -11 -9 5.0011 4.5336
-1 -11 -8 4.6638 -3.4554
-1 -11 -7 -3.4537 3.5562
-1 -11 -6 0.5844 -15.1102
-1 -11 -5 -15.3415 -0.8599
-1 -11 -4 -7.0608 -1.0158
-1 -11 -3 -6.7781 -10.8891
-1 -11 -2 -12.1381 7.6847
-1 -11 -1 16.4384 -14.5747
-1 -10 -34 1.3700 0.1591
-1 -10 -33 0.3634 1.2213
-1 -10 -32 -0.5420 0.1665
-1 -10 -31 -1.0375 -0.1082
-1 -10 -30 -2.2556 0.1571
-1 -10 -29 -0.1457 0.6317
-1 -10 -28 0.3388 -0.5451
-1 -10 -27 -0.4123 1.8627
-1 -10 -26 2.2105 -2.1139
-1 -10 -25 0.8600 -3.1317
-1 -10 -24 -0.2621 -1.5855
-1 -10 -23 5.4669 -2.7488
-1 -10 -22 -1.1190 -0.2307
-1 -10 -21 -0.5886 3.6901
-1 -10 -20 -0.7357 1.4421
-1 -10 -19 -4.2844 4.6230
-1 -10 -18 2.0576 5.9290
-1 -10 -17 -5.9336 -3.2163
-1 -10 -16 0.0812 2.6492
-1 -10 -15 3.1271 -7.5784
-1 -10 -14 1.0699 -3.7691
-1 -10 -13 8.9616 8.3788
-1 -10 -12 0.3270 -9.9340
-1 -10 -11 -0.4840 1.1721
-1 -10 -10 -0.0852 0.1247
-1 -10 -9 0.9346 -14.0568
-1 -10 -8 -2.6258 1.3791
-1 -10 -7 -2.5529 10.5095
-1 -10 -6 -5.9530 3.2634
-1 -10 -5 -11.7900 19.3511
-1 -10 -4 7.7041 23.0118
-1 -10 -3 -15.0158 -18.0970
-1 -10 -2 -0.6903 -3.3838
-1 -10 -1 22.9014 -23.4097
-1 -9 -34 -4.7094 -0.1461
-1 -9 -33 0.2663 -0.0181
-1 -9 -32 2.3837 0.6901
-1 -9 -31 -0.3179 1.2418
-1 -9 -30 1.8810 0.7036
-1 -9 -29 0.3045 -0.7125
-1 -9 -28 -5.0158 -2.4421
-1 -9 -27 -2.6509 -1.7584
-1 -9 -26 -1.4683 0.9963
-1 -9 -25 -1.1177 -2.0959
-1 -9 -24 6.3543 -1.1153
-1 -9 -23 2.0238 3.1655
-1 -9 -22 1.6806 -2.0770
-1 -9 -21 -0.7097 3.0983
-1 -9 -20 -4.0217 1.7878
-1 -9 -19 3.4881 -0.2497
-1 -9 -18 3.2871 2.5660
-1 -9 -17 0.0505 -0.5758
-1 -9 -16 3.9289 -0.1196
-1 -9 -15 -2.6255 -5.8024
-1 -9 -14 -13.6311 -5.3270
-1 -9 -13 -0.1008 -4.0160
-1 -9 -12 -10.6046 3.7337
-1 -9 -11 -6.2667 3.6011
-1 -9 -10 18.5008 -0.6597
-1 -9 -9 6.2583 10.2259
-1 -9 -8 17.0911 0.9902
-1 -9 -7 6.9656 6.0321
-1 -9 -6 -6.7328 -0.7375
-1 -9 -5 -2.5793 -1.0610
-1 -9 -4 -12.9809 8.1927
-1 -9 -3 -5.5551 -15.3267
-1 -9 -2 -12.4667 4.5557
-1 -9 -1 1.4122 -14.5665
-1 -8 -35 0.1537 0.0404
-1 -8 -34 0.7025 -2.3486
-1 -8 -33 -1.4950 0.7721
-1 -8 -32 -0.7259 -0.2672
-1 -8 -31 0.4566 1.7075
-1 -8 -30 -0.7769 2.7057
-1 -8 -29 1.2383 1.2640
-1 -8 -28 -0.1271 -1.9089
-1 -8 -27 -3.2290 0.9981
-1 -8 -26 -0.6255 -1.0824
-1 -8 -25 1.1757 -1.9490
-1 -8 -24 -1.6420 0.9764
-1 -8 -23 4.5405 -2.3456
-1 -8 -22 4.0669 -2.0541
-1 -8 -21 -0.3228 -1.3334
-1 -8 -20 2.2262 -1.8471
-1 -8 -19 -5.2558 -1.6746
-1 -8 -18 0.9177 6.3475
-1 -8 -17 -4.4154 4.6296
-1 -8 -16 -7.7454 8.1681
-1 -8 -15 4.0138 3.0589
-1 -8 -14 -1.2288 -8.6274
-1 -8 -13 7.3159 5.7520
-1 -8 -12 4.4347 -9.2033
-1 -8 -11 0.5409 -5.8058
-1 -8 -10 1.5687 1.5105
-1 -8 -9 -3.9103 -14.3909
-1 -8 -8 5.3319 0.1857
-1 -8 -7 8.4718 1.1688
-1 -8 -6 3.4364 1.1004
-1 -8 -5 -10.4260 8.2187
-1 -8 -4 0.2626 21.4391
-1 -8 -3 -17.9245 9.5480
-1 -8 -2 -28.9952 1.7888
-1 -8 -1 18.5551 3.9407
-1 -7 -35 3.9615 1.0196
-1 -7 -34 -2.6271 1.2309
-1 -7 -33 -3.0927 0.6677
-1 -7 -32 3.4891 -0.7355
-1 -7 -31 0.1914 -2.0072
-1 -7 -30 1.5992 0.4203
-1 -7 -29 3.4374 1.4092
-1 -7 -28 -4.2390 0.7875
-1 -7 -27 -3.6110 0.2417
-1 -7 -26 -0.0361 -0.8470
-1 -7 -25 -6.2985 -1.6469
-1 -7 -24 4.4190 -5.0148
-1 -7 -23 3.0414 1.3572
-1 -7 -22 -0.2642 0.5905
-1 -7 -21 4.2118 -0.1399
-1 -7 -20 -7.3684 3.5819
-1 -7 -19 -0.2005 0.9869
-1 -7 -18 7.2235 3.2602
-1 -7 -17 1.8749 -1.0170
-1 -7 -16 7.2439 1.1832
-1 -7 -15 6.6261 -1.3176
-1 -7 -14 -13.6614 -4.2379
-1 -7 -13 -3.9736 -5.8865
-1 -7 -12 -10.9397 -4.4751
-1 -7 -11 -25.1427 6.6204
-1 -7 -10 14.9376 -7.1264
-1 -7 -9 0.7355 1.3394
-1 -7 -8 17.2406 2.5337
-1 -7 -7 30.2475 -4.9288
-1 -7 -6 -17.5616 9.3435
-1 -7 -5 8.5810 9.1217
-1 -7 -4 -6.3704 18.6011
-1 -7 -3 -12.6152 -2.0913
-1 -7 -2 10.3298 -2.5531
-1 -7 -1 -7.3518 -3.9726
-1 -6 -35 1.1049 1.7419
-1 -6 -34 1.9920 -2.1575
-1 -6 -33 -1.8720 -1.4019
-1 -6 -32 -2.6378 -2.2403
-1 -6 -31 -0.7024 1.0673
-1 -6 -30 -0.6364 4.1742
-1 -6 -29 2.8775 3.3549
-1 -6 -28 2.4549 -0.5848
-1 -6 -27 -1.9707 -0.9072
-1 -6 -26 -3.6458 -2.6233
-1 -6 -25 -1.2239 -1.2369
-1 -6 -24 -1.6469 2.6416
-1 -6 -23 0.1917 -0.1086
-1 -6 -22 5.3118 3.4854
-1 -6 -21 0.9715 -2.9368
-1 -6 -20 5.2055 -4.9383
-1 -6 -19 -1.7084 -7.0597
-1 -6 -18 -1.6728 -5.5230
-1 -6 -17 1.3495 4.8714
-1 -6 -16 -11.2126 8.8868
-1 -6 -15 0.7967 15.3114
-1 -6 -14 -3.1956 2.7346
-1 -6 -13 0.2282 3.5155
-1 -6 -12 6.0938 -5.7432
-1 -6 -11 -1.6293 -9.8186
-1 -6 -10 4.6182 -4.5112
-1 -6 -9 -10.2093 -14.5518
-1 -6 -8 -2.4832 8.5137
-1 -6 -7 16.5962 -5.8825
-1 -6 -6 18.9973 -0.1809
-1 -6 -5 8.2708 2.4274
-1 -6 -4 -0.1724 -14.3631
-1 -6 -3 -13.3248 21.4511
-1 -6 -2 -38.5679 4.5435
-1 -6 -1 -0.6066 20.8543
-1 -5 -35 3.4357 -0.0813
-1 -5 -34 0.8278 0.8306
-1 -5 -33 -3.8919 2.2628
-1 -5 -32 1.7259 1.5000
-1 -5 -31 1.1643 -2.8712
-1 -5 -30 -0.2439 -1.3495
-1 -5 -29 3.9156 -0.1642
-1 -5 -28 -0.8107 0.7091
-1 -5 -27 -3.5496 4.4015
-1 -5 -26 2.5136 -0.3585
-1 -5 -25 -7.0688 -0.0737
-1 -5 -24 1.0876 -3.8451
-1 -5 -23 4.1872 -3.8944
-1 -5 -22 -4.4684 1.2678
-1 -5 -21 7.4936 -1.2168
-1 -5 -20 -6.1413 2.4416
-1 -5 -19 -7.7052 1.1381
-1 -5 -18 6.6020 3.7904
-1 -5 -17 1.9217 0.2165
-1 -5 -16 7.6997 -0.2589
-1 -5 -15 15.9941 1.6632
-1 -5 -14 -4.2455 -0.1152
-1 -5 -13 -4.5158 2.2860
-1 -5 -12 -3.9259 -9.7130
-1 -5 -11 -34.4097 6.8447
-1 -5 -10 4.8804 -1.2338
-1 -5 -9 -4.2665 -12.5692
-1 -5 -8 -2.0616 -0.7247
-1 -5 -7 45.7036 -20.2429
-1 -5 -6 -21.0815 -0.6399
-1 -5 -5 4.1409 17.8710
-1 -5 -4 7.6896 20.6567
-1 -5 -3 -26.6512 16.3682
-1 -5 -2 37.2226 -2.3700
-1 -5 -1 4.9740 -4.0390
-1 -4 -36 -0.4957 1.8321
-1 -4 -35 0.7591 1.9713
-1 -4 -34 1.9540 -1.2102
-1 -4 -33 0.6406 -1.0397
-1 -4 -32 -1.0180 -4.1100
-1 -4 -31 -1.5551 -0.9177
-1 -4 -30 -2.7192 3.4974
-1 -4 -29 1.2594 3.4429
-1 -4 -28 2.7758 2.2631
-1 -4 -27 1.9137 0.3899
-1 -4 -26 -0.8613 -5.1484
-1 -4 -25 -3.6366 -2.8506
-1 -4 -24 -1.6187 1.9130
-1 -4 -23 -2.6216 -2.6526
-1 -4 -22 2.4417 10.5547
-1 -4 -21 -0.6258 3.9797
-1 -4 -20 4.0487 -4.4088
-1 -4 -19 5.0188 -2.0873
-1 -4 -18 -3.4817 -18.0935
-1 -4 -17 5.7641 -6.5182
-1 -4 -16 -5.6406 1.8692
-1 -4 -15 -2.2603 10.4614
-1 -4 -14 -1.4769 20.1190
-1 -4 -13 -4.3846 11.4450
-1 -4 -12 6.3432 -2.2733
-1 -4 -11 -7.3615 -4.9983
-1 -4 -10 2.5116 -11.0835
-1 -4 -9 -10.9665 -22.0807
-1 -4 -8 -17.1449 20.0822
-1 -4 -7 9.4840 -1.9314
-1 -4 -6 20.8442 2.1441
-1 -4 -5 28.0902 20.1184
-1 -4 -4 11.0191 -55.1280
-1 -4 -3 -9.0706 0.1185
-1 -4 -2 -26.8211 -0.5518
-1 -4 -1 -11.0278 -6.5619
-1 -3 -36 -2.6502 1.4210
-1 -3 -35 1.2845 0.1328
-1 -3 -34 2.1459 -1.3841
-1 -3 -33 -2.1933 0.7527
-1 -3 -32 1.1398 2.6868
-1 -3 -31 2.0774 -0.8469
-1 -3 -30 -2.1737 -0.6130
-1 -3 -29 0.6445 -0.7403
-1 -3 -28 1.7689 -3.1474
-1 -3 -27 -2.6359 5.0424
-1 -3 -26 3.8246 2.0892
-1 -3 -25 -3.8082 -0.0478
-1 -3 -24 -1.5874 1.0519
-1 -3 -23 6.0596 -4.9896
-1 -3 -22 -6.2641 -1.1525
-1 -3 -21 6.2631 -0.9915
-1 -3 -20 -1.2376 1.2354
-1 -3 -19 -12.3959 -0.7022
-1 -3 -18 1.9517 0.8283
-1 -3 -17 -1.7955 3.1504
-1 -3 -16 4.3276 -0.5211
-1 -3 -15 17.8125 -0.8988
-1 -3 -14 5.1960 -2.9672
-1 -3 -13 -0.9275 11.5856
-1 -3 -12 4.2925 -3.6679
-1 -3 -11 -27.0586 6.2534
-1 -3 -10 -1.5035 15.7393
-1 -3 -9 1.6155 -17.2692
-1 -3 -8 -19.3410 -3.6092
-1 -3 -7 40.3610 -26.0111
-1 -3 -6 -17.5831 -24.0092
-1 -3 -5 -13.9752 17.0545
-1 -3 -4 13.1330 14.8863
-1 -3 -3 -45.7757 21.3208
-1 -3 -2 47.3973 10.5326
-1 -3 -1 34.7473 -13.9428
-1 -2 -36 -1.0698 2.3406
-1 -2 -35 -0.2729 4.5864
-1 -2 -34 -0.3445 -2.0423
-1 -2 -33 1.1437 -0.1232
-1 -2 -32 1.5500 -2.7737
-1 -2 -31 0.0624 -3.4470
-1 -2 -30 -2.4278 2.2521
-1 -2 -29 -0.7714 2.0883
-1 -2 -28 0.1642 1.8976
-1 -2 -27 2.1080 3.9365
-1 -2 -26 3.7577 -4.0272
-1 -2 -25 -2.4549 -5.1353
-1 -2 -24 -1.5407 1.0923
-1 -2 -23 -2.0359 -8.8049
-1 -2 -22 0.6596 8.7737
-1 -2 -21 -2.6359 13.0052
-1 -2 -20 -3.6989 -2.1108
-1 -2 -19 7.2650 10.3526
-1 -2 -18 -1.4335 -15.3832
-1 -2 -17 4.4714 -19.0238
-1 -2 -16 3.2169 -2.9630
-1 -2 -15 -2.6210 -9.8769
-1 -2 -14 0.4907 19.6039
-1 -2 -13 -2.1452 25.0131
-1 -2 -12 11.5007 -1.0391
-1 -2 -11 -8.2789 3.3814
-1 -2 -10 -2.7098 -8.6332
-1 -2 -9 -7.8056 -35.8586
-1 -2 -8 -27.5012 19.9595
-1 -2 -7 0.2543 11.1952
-1 -2 -6 4.3655 2.9931
-1 -2 -5 26.6145 59.1411
-1 -2 -4 28.1219 -55.2506
-1 -2 -3 -6.4635 -40.8307
-1 -2 -2 -15.4435 -3.6570
-1 -2 -1 -7.0834 -70.2834
-1 -1 -36 -2.2398 0.6685
-1 -1 -35 -2.2014 0.5983
-1 -1 -34 1.1438 -1.1685
-1 -1 -33 -1.8408 -0.5661
-1 -1 -32 0.9021 1.1425
-1 -1 -31 4.2736 0.1665
-1 -1 -30 -1.6888 0.1048
-1 -1 -29 -3.4484 0.2330
-1 -1 -28 1.2103 -4.9743
-1 -1 -27 -2.0561 1.7684
-1 -1 -26 2.1882 4.5190
-1 -1 -25 0.6583 -0.5228
-1 -1 -24 -1.4321 3.3724
-1 -1 -23 6.7632 -1.5828
-1 -1 -22 -3.1663 -2.6328
-1 -1 -21 2.4372 -0.3196
-1 -1 -20 0.9589 1.1597
-1 -1 -19 -11.4434 -1.1907
-1 -1 -18 -0.0930 -4.2820
-1 -1 -17 -5.6471 2.1961
-1 -1 -16 0.6159 2.6774
-1 -1 -15 13.3025 -1.2598
-1 -1 -14 3.7898 -11.6790
-1 -1 -13 2.0154 6.9956
-1 -1 -12 4.0043 4.4321
-1 -1 -11 -14.5458 2.7415
-1 -1 -10 -1.0789 32.8349
-1 -1 -9 13.3667 -7.8845
-1 -1 -8 -12.0255 -2.4509
-1 -1 -7 28.8773 -11.8865
-1 -1 -6 -7.6776 -43.8776
-1 -1 -5 -31.9225 6.7882
-1 -1 -4 6.5926 9.6242
-1 -1 -3 -64.5215 8.8020
-1 -1 -2 23.1956 25.2512
-1 -1 -1 63.6806 -8.9552
0 0 2 -32.6927 0.1770
0 0 4 -118.8330 1.2739
0 0 6 44.3729 -0.5273
0 0 8 49.7891 -1.5543
0 0 10 -35.4864 0.9951
0 0 12 -11.3043 1.1511
0 0 14 39.3862 -1.1757
0 0 16 0.2803 -0.6886
0 0 18 -27.6503 1.0357
0 0 20 -7.7191 0.4411
0 0 22 21.7649 -0.9409
0 0 24 1.4205 -0.1976
0 0 26 -10.0144 0.8241
0 0 28 3.1680 -0.0263
0 0 30 2.4909 -0.6312
0 0 32 -2.3817 0.1192
0 0 34 -2.3944 0.4646
0 0 36 4.0228 -0.1937
0 1 1 0.9205 -23.1792
0 1 2 0.9506 109.6071
0 1 3 -1.0993 20.7841
0 1 4 -0.4238 -26.4882
0 1 5 -0.3462 10.7684
0 1 6 -1.4370 -54.9347
0 1 7 1.0301 6.5642
0 1 8 0.6889 11.6420
0 1 9 0.1465 -10.9879
0 1 10 1.1942 17.8943
0 1 11 -0.8963 -8.4631
0 1 12 -0.8514 -13.4378
0 1 13 0.0263 -0.7885
0 1 14 -0.7481 -2.5301
0 1 15 0.7062 2.5431
0 1 16 0.8415 12.8404
0 1 17 -0.2225 1.2877
0 1 18 0.4330 7.3626
0 1 19 -0.5435 0.8647
0 1 20 -0.7701 -9.1190
0 1 21 0.2436 3.6646
0 1 22 -0.2725 -9.1835
0 1 23 0.4938 -2.0572
0 1 24 0.7232 6.2123
0 1 25 -0.2641 -2.6729
0 1 26 0.0633 2.7327
0 1 27 -0.3497 -0.9240
0 1 28 -0.5703 1.1485
0 1 29 0.2617 3.0378
0 1 30 0.0544 -3.2055
0 1 31 0.2184 -1.0227
0 1 32 0.4414 0.8071
0 1 33 -0.2602 -0.7355
0 1 34 -0.1255 2.2446
0 1 35 -0.1335 2.2833
0 1 36 -0.3263 -2.8173
0 2 0 110.5781 0.6652
0 2 1 75.7056 0.0402
0 2 2 -21.3448 0.1272
0 2 3 40.7692 -0.2745
0 2 4 -82.8738 0.0923
0 2 5 -45.4628 0.4108
0 2 6 38.0510 -0.1780
0 2 7 -15.6636 0.3771
0 2 8 36.4188 -0.3300
0 2 9 10.0062 -0.6707
0 2 10 -32.7640 0.1891
0 2 11 -3.6890 -0.0923
0 2 12 -10.8131 0.2182
0 2 13 -11.5491 0.7084
0 2 14 26.5589 -0.1672
0 2 15 19.4135 -0.0638
0 2 16 5.7765 -0.0740
0 2 17 11.5558 -0.6583
0 2 18 -20.2464 0.1377
0 2 19 -8.3236 0.1844
0 2 20 -6.1094 0.0736
0 2 21 -11.9673 0.4916
0 2 22 16.2575 -0.1413
0 2 23 4.2843 -0.2755
0 2 24 1.5134 -0.0900
0 2 25 4.1070 -0.3130
0 2 26 -8.6578 0.1187
0 2 27 -2.7817 0.2889
0 2 28 1.7923 0.0407
0 2 29 0.9924 0.2042
0 2 30 3.5755 -0.0753
0 2 31 1.9326 -0.2691
0 2 32 -2.7686 -0.0302
0 2 33 0.0377 -0.0893
0 2 34 -0.9561 0.0950
0 2 35 -2.9200 0.2089
0 2 36 3.4003 -0.0208
0 3 1 0.3309 -49.8064
0 3 2 0.8523 64.6634
0 3 4 -0.3460 -24.7547
0 3 6 -0.9536 -45.1683
0 3 7 0.0686 8.7321
0 3 8 0.4876 37.0284
0 3 9 -0.0547 -16.2341
0 3 10 0.7693 20.1212
0 3 11 -0.1026 -14.3496
0 3 12 -0.4880 -22.1783
0 3 13 0.0525 -3.2839
0 3 14 -0.5246 -13.8616
0 3 15 0.0595 0.6060
0 3 16 0.5372 13.1164
0 3 17 -0.0482 2.9333
0 3 18 0.2940 8.7818
0 3 19 -0.0181 6.3040
0 3 20 -0.5435 -12.0067
0 3 21 0.0083 5.4749
0 3 22 -0.1804 -2.9791
0 3 23 0.0335 -5.6065
0 3 24 0.4939 8.0365
0 3 25 -0.0059 -4.9198
0 3 26 0.0544 1.4092
0 3 27 -0.0414 -0.8049
0 3 28 -0.3752 -4.8380
0 3 29 0.0169 4.4828
0 3 30 0.0331 0.5422
0 3 31 0.0225 -1.4320
0 3 32 0.2910 2.2085
0 3 33 -0.0157 -1.1201
0 3 34 -0.0928 -2.0102
0 3 35 -0.0205 2.6105
0 3 36 -0.2075 0.9727
0 4 0 7.8106 0.5489
0 4 1 74.4385 0.3424
0 4 2 -5.0562 -0.0232
0 4 3 46.9415 0.2556
0 4 4 -16.4632 -0.5167
0 4 5 -44.9618 -0.2230
0 4 6 26.9580 0.1364
0 4 7 -13.1082 -0.0523
0 4 8 15.4679 0.4380
0 4 9 10.8553 0.2140
0 4 10 -21.8584 -0.3178
0 4 11 -8.6361 -0.0072
0 4 12 -14.1441 -0.3342
0 4 13 -12.5213 -0.1863
0 4 14 0.3924 0.3957
0 4 15 17.0315 0.0465
0 4 16 13.1220 0.2449
0 4 17 17.7767 0.1140
0 4 18 -1.8092 -0.3481
0 4 19 -9.2249 -0.0412
0 4 20 -2.1168 -0.1569
0 4 21 -15.1816 -0.0713
0 4 22 3.2749 0.3128
0 4 23 4.1684 0.0630
0 4 24 1.5511 0.0549
0 4 25 6.0576 0.0565
0 4 26 -4.8452 -0.2810
0 4 27 -3.5763 -0.0794
0 4 28 -1.5534 0.0023
0 4 29 -0.3324 -0.0401
0 4 30 4.6330 0.2329
0 4 31 4.8637 0.0723
0 4 32 -1.4242 -0.0408
0 4 33 -1.6812 0.0174
0 4 34 -1.1268 -0.1658
0 4 35 -2.4037 -0.0440
0 4 36 2.3270 0.0628
0 5 1 -0.1017 -42.0057
0 5 2 0.1328 17.5807
0 5 3 0.2050 34.6086
0 5 4 0.0194 -30.4995
0 5 5 0.0673 22.3492
0 5 6 -0.2198 -29.8396
0 5 8 0.0993 50.1422
0 5 9 -0.0530 -2.0090
0 5 10 0.2193 26.7353
0 5 11 -0.0126 0.3268
0 5 12 -0.1274 -23.4410
0 5 13 0.0760 -2.3383
0 5 14 -0.1668 -21.8538
0 5 15 -0.0276 -9.4762
0 5 16 0.1673 8.5547
0 5 17 -0.0095 1.5795
0 5 18 0.0869 4.9577
0 5 19 0.0471 12.0922
0 5 20 -0.1680 -8.4292
0 5 21 -0.0254 0.5281
0 5 22 -0.0311 3.2470
0 5 23 -0.0400 -6.1162
0 5 24 0.1331 8.8195
0 5 25 0.0221 -2.8344
0 5 26 0.0012 -1.0576
0 5 27 0.0078 1.9818
0 5 28 -0.1061 -8.8077
0 5 29 -0.0171 -0.3615
0 5 30 0.0307 2.8650
0 5 31 -0.0011 -1.0260
0 5 32 0.0703 4.3236
0 5 33 0.0202 1.5861
0 5 34 -0.0432 -5.6474
0 5 35 -0.0170 -0.6433
0 5 36 -0.0315 -0.1100
0 6 0 -37.8798 0.0343
0 6 1 17.6028 0.3616
0 6 2 -7.5975 -0.0997
0 6 3 17.1898 0.2820
0 6 4 19.1908 -0.0198
0 6 5 -14.6475 -0.5017
0 6 6 21.9235 0.0607
0 6 7 -0.0961 -0.1875
0 6 8 7.7407 -0.0304
0 6 9 7.0453 0.5693
0 6 10 -8.3971 -0.0211
0 6 11 -3.3370 0.0290
0 6 12 -19.5217 0.0323
0 6 13 -5.3852 -0.4975
0 6 14 -11.1951 -0.0053
0 6 15 -2.7372 0.0592
0 6 16 9.5413 -0.0187
0 6 17 10.6925 0.3955
0 6 18 11.0642 0.0393
0 6 19 -1.1317 -0.0953
0 6 20 2.2682 -0.0250
0 6 21 -6.7732 -0.3159
0 6 22 -4.0029 -0.0311
0 6 23 -0.5524 0.1517
0 6 24 -0.5433 0.0493
0 6 25 4.3895 0.2396
0 6 26 -2.9860 0.0206
0 6 27 -1.5735 -0.1687
0 6 28 -1.8120 -0.0443
0 6 29 -2.7406 -0.1679
0 6 30 2.4229 -0.0097
0 6 31 5.9230 0.1589
0 6 32 0.9058 0.0401
0 6 33 -1.0275 0.1093
0 6 34 -2.8668 -0.0098
0 6 35 -2.5639 -0.1459
0 7 1 -0.1379 -10.9378
0 7 2 -0.2700 -4.1698
0 7 3 -0.0071 18.7132
0 7 4 0.0849 -31.0648
0 7 5 0.0653 2.4043
0 7 6 0.1095 -10.9924
0 7 8 -0.0408 29.7311
0 7 9 -0.0330 6.0097
0 7 11 0.0060 21.5722
0 7 12 0.0161 -12.4714
0 7 13 0.0189 3.3508
0 7 14 0.0376 -16.2310
0 7 15 -0.0319 -15.2558
0 7 16 -0.0268 1.8273
0 7 17 0.0139 -0.7220
0 7 18 -0.0173 -1.2620
0 7 19 0.0173 9.3502
0 7 20 0.0307 -0.5124
0 7 21 -0.0117 -3.8938
0 7 22 0.0292 3.4623
0 7 23 -0.0083 -4.7051
0 7 24 -0.0379 8.2817
0 7 25 0.0133 3.0770
0 7 26 -0.0124 -2.5629
0 7 27 0.0027 3.7418
0 7 28 0.0282 -6.9544
0 7 29 -0.0198 -5.8415
0 7 30 0.0043 1.7317
0 7 31 0.0041 -0.3747
0 7 32 -0.0331 3.0495
0 7 33 0.0089 5.5974
0 7 34 0.0116 -4.9496
0 7 35 -0.0191 -2.4905
0 8 0 -8.3585 -0.0903
0 8 1 -26.8012 0.0078
0 8 2 -14.4821 0.0325
0 8 3 -22.8018 -0.0666
0 8 4 6.2463 0.1186
0 8 5 8.3282 -0.0202
0 8 6 16.3702 -0.0446
0 8 7 9.2380 0.0316
0 8 8 10.6499 -0.1433
0 8 9 5.6773 -0.0118
0 8 10 -2.8457 0.0702
0 8 11 8.5014 -0.0090
0 8 12 -17.2157 0.1059
0 8 13 -2.1403 0.0474
0 8 14 -0.9005 -0.0819
0 8 15 -13.8270 -0.0259
0 8 16 1.6164 -0.0877
0 8 17 -2.9030 -0.0396
0 8 18 6.1854 0.0998
0 8 19 6.1205 0.0383
0 8 20 2.5944 0.0496
0 8 21 2.3458 0.0196
0 8 22 0.1185 -0.1036
0 8 23 -1.1887 -0.0464
0 8 24 -2.0241 -0.0091
0 8 25 1.9530 -0.0084
0 8 26 -4.3926 0.0889
0 8 27 -1.9382 0.0499
0 8 28 0.0264 -0.0005
0 8 29 -1.8426 0.0036
0 8 30 -0.6948 -0.0628
0 8 31 3.2462 -0.0327
0 8 32 2.2444 0.0041
0 8 33 -0.1662 0.0098
0 8 34 -1.7980 0.0564
0 8 35 -3.1628 0.0133
0 9 1 0.0775 17.1444
0 9 2 -0.1138 6.5298
0 9 3 -0.0975 3.8422
0 9 4 -0.0237 -13.0401
0 9 5 -0.0710 -16.5902
0 9 6 0.1225 -2.0768
0 9 7 0.0903 -25.7781
0 9 8 -0.0460 0.2023
0 9 9 0.0394 -0.5036
0 9 10 -0.1086 9.2784
0 9 11 -0.0742 28.0100
0 9 12 0.0822 -0.1030
0 9 13 -0.0225 6.3399
0 9 14 0.0851 -2.2920
0 9 15 0.0842 -10.8135
0 9 16 -0.0901 -1.4765
0 9 17 -0.0247 -1.9697
0 9 18 -0.0465 -3.3263
0 9 19 -0.0732 1.2825
0 9 20 0.0784 3.5962
0 9 21 0.0425 -3.3150
0 9 22 0.0380 0.1759
0 9 23 0.0519 -4.2439
0 9 24 -0.0770 3.5759
0 9 25 -0.0355 8.1447
0 9 26 -0.0146 -0.3008
0 9 27 -0.0273 3.7152
0 9 28 0.0725 -1.9843
0 9 29 0.0413 -6.2698
0 9 30 0.0013 -1.6975
0 9 31 0.0133 0.5836
0 9 32 -0.0559 0.3920
0 9 33 -0.0490 5.1944
0 9 34 0.0143 -0.5317
0 10 0 44.1223 0.1184
0 10 1 -25.9150 -0.1598
0 10 2 -7.4749 0.0052
0 10 3 -31.6292 -0.0608
0 10 4 -29.8528 -0.1672
0 10 6 7.2459 0.0627
0 10 7 6.8539 0.0434
0 10 8 12.9502 0.1697
0 10 9 8.8230 -0.1544
0 10 10 -5.6858 -0.1229
0 10 11 10.3263 -0.0185
0 10 12 -5.3572 -0.1348
0 10 13 -5.6623 0.1389
0 10 14 10.9648 0.1390
0 10 15 -7.2905 -0.0005
0 10 16 -0.1781 0.0806
0 10 17 -7.5432 -0.1214
0 10 18 -7.2923 -0.1304
0 10 19 4.9610 0.0152
0 10 20 0.0165 -0.0439
0 10 21 3.4821 0.1067
0 10 22 5.3563 0.1260
0 10 23 3.2076 -0.0485
0 10 24 -0.2700 0.0112
0 10 25 1.4575 -0.0873
0 10 26 -3.9705 -0.1142
0 10 27 -3.7833 0.0506
0 10 28 0.1841 0.0115
0 10 29 -0.3789 0.0685
0 10 30 0.0034 0.0869
0 10 31 -0.5831 -0.0357
0 10 32 1.6849 -0.0218
0 10 33 -0.2199 -0.0505
0 10 34 -1.1993 -0.0462
0 11 1 0.0338 14.9891
0 11 2 0.1705 29.1477
0 11 3 0.0216 -1.2810
0 11 4 0.0095 7.6880
0 11 5 -0.0616 -12.1825
0 11 6 -0.1118 -6.7461
0 11 7 0.0314 -9.8220
0 11 8 0.0165 -10.1928
0 11 9 0.0329 -4.2498
0 11 10 0.0803 -9.6135
0 11 11 -0.0656 14.6381
0 11 12 -0.0529 5.5407
0 11 13 -0.0047 2.0638
0 11 14 -0.0596 6.1897
0 11 15 0.0783 -0.2927
0 11 16 0.0858 0.1626
0 11 17 -0.0290 -1.9167
0 11 18 0.0249 -0.3485
0 11 19 -0.0664 -4.8389
0 11 20 -0.0719 0.6305
0 11 21 0.0285 -0.5159
0 11 22 -0.0054 -2.1470
0 11 23 0.0538 -1.3731
0 11 24 0.0493 -2.2107
0 11 25 -0.0278 5.4475
0 11 26 -0.0048 2.2061
0 11 27 -0.0361 3.2161
0 11 28 -0.0422 1.4196
0 11 29 0.0364 -2.3423
0 11 30 0.0239 -1.9302
0 11 31 0.0218 -0.5466
0 11 32 0.0463 -0.0496
0 11 33 -0.0275 2.1948
0 11 34 -0.0270 2.3324
0 12 0 55.9404 0.1133
0 12 1 2.9304 0.0386
0 12 2 4.5260 -0.0623
0 12 3 -2.9514 0.0384
0 12 4 -41.2773 -0.1331
0 12 5 -7.8952 -0.0413
0 12 6 -1.6252 0.0709
0 12 7 -0.8642 -0.0177
0 12 8 7.6184 0.1417
0 12 9 11.6343 0.0454
0 12 10 -4.9707 -0.0792
0 12 11 -0.4986 -0.0035
0 12 12 4.2334 -0.1119
0 12 13 -6.4065 -0.0419
0 12 14 9.9789 0.0744
0 12 15 2.5850 0.0215
0 12 16 3.6274 0.0834
0 12 17 -0.8303 0.0310
0 12 18 -13.4342 -0.0828
0 12 19 -2.3086 -0.0262
0 12 20 -3.9527 -0.0539
0 12 21 0.0986 -0.0298
0 12 22 5.6270 0.0951
0 12 23 5.7870 0.0271
0 12 24 3.2363 0.0269
0 12 25 1.5253 0.0149
0 12 26 -1.7216 -0.0854
0 12 27 -3.9719 -0.0338
0 12 28 0.8413 -0.0168
0 12 29 -1.0058 0.0050
0 12 30 1.5429 0.0578
0 12 31 0.4890 0.0190
0 12 32 -0.7620 0.0096
0 12 33 -0.2529 -0.0127
0 13 1 -0.1353 -5.8883
0 13 2 0.1029 27.9092
0 13 3 0.1127 2.5492
0 13 4 0.0052 13.3585
0 13 5 0.0998 5.0220
0 13 6 -0.0957 -8.7029
0 13 7 -0.1407 0.1188
0 13 8 0.0425 -6.9492
0 13 9 -0.0450 2.3742
0 13 10 0.0856 -11.2886
0 13 11 0.1345 -5.0522
0 13 12 -0.0777 2.9780
0 13 13 0.0063 -2.7060
0 13 14 -0.0702 2.4857
0 13 15 -0.1241 6.1627
0 13 16 0.0876 5.5515
0 13 17 0.0276 -0.8185
0 13 18 0.0529 5.1197
0 13 19 0.0889 -3.4111
0 13 20 -0.0727 -5.6768
0 13 21 -0.0423 -0.0206
0 13 22 -0.0462 -4.7017
0 13 23 -0.0652 1.7952
0 13 24 0.0634 -0.7002
0 13 25 0.0485 -0.5301
0 13 26 0.0298 0.8654
0 13 27 0.0544 1.6963
0 13 28 -0.0625 1.6965
0 13 29 -0.0574 -1.0684
0 13 30 -0.0128 1.6443
0 13 31 -0.0405 -0.1987
0 13 32 0.0596 -1.1065
0 13 33 0.0667 1.4209
0 14 0 23.6139 -0.0811
0 14 1 18.4342 0.0862
0 14 2 7.3081 0.0199
0 14 3 21.3502 0.0464
0 14 4 -18.0370 0.0397
0 14 5 -13.6988 -0.0577
0 14 6 -7.3474 -0.0307
0 14 7 -4.2711 -0.0371
0 14 8 1.0815 -0.0117
0 14 9 5.9368 0.0503
0 14 10 1.0165 0.0260
0 14 11 -8.1720 0.0200
0 14 12 2.6849 0.0072
0 14 13 -2.3275 -0.0419
0 14 14 4.0274 -0.0162
0 14 15 4.7628 -0.0059
0 14 16 5.7849 -0.0094
0 14 17 8.1771 0.0335
0 14 18 -7.2315 0.0125
0 14 19 -6.7083 -0.0006
0 14 20 -8.0971 0.0152
0 14 21 -4.5359 -0.0328
0 14 22 2.7541 -0.0197
0 14 23 3.8125 0.0047
0 14 24 5.4915 -0.0010
0 14 25 2.3443 0.0191
0 14 26 -0.3946 0.0164
0 14 27 -3.8860 -0.0041
0 14 28 1.0492 -0.0117
0 14 29 0.0044 -0.0063
0 14 30 -0.0219 -0.0090
0 14 31 4.3434 -0.0072
0 14 32 0.0569 0.0109
0 15 1 -0.0126 -14.6926
0 15 2 -0.0590 10.1467
0 15 3 0.0427 3.1129
0 15 4 -0.0256 5.7707
0 15 5 0.0193 12.2793
0 15 6 0.0637 -6.5594
0 15 7 -0.0641 4.5540
0 15 8 -0.0040 -1.7781
0 15 9 -0.0067 5.7578
0 15 10 -0.0421 2.9078
0 15 11 0.0538 -11.6830
0 15 12 0.0299 -5.2034
0 15 13 0.0086 -3.4079
0 15 14 0.0207 -4.9003
0 15 15 -0.0512 1.7162
0 15 16 -0.0500 8.3064
0 15 17 -0.0040 0.9428
0 15 18 0.0036 7.8908
0 15 19 0.0446 4.1580
0 15 20 0.0416 -6.6822
0 15 21 0.0053 -0.3229
0 15 22 -0.0099 -6.2480
0 15 23 -0.0539 -1.0881
0 15 24 -0.0433 4.4231
0 15 25 0.0046 -1.6741
0 15 26 0.0168 -1.0590
0 15 27 0.0562 -0.0320
0 15 28 0.0394 -0.0649
0 15 29 -0.0134 -2.6991
0 15 30 -0.0268 1.4273
0 15 31 -0.0501 3.0906
0 15 32 -0.0285 -0.8197
0 16 0 -2.9355 -0.0729
0 16 1 12.8380 -0.0406
0 16 2 1.0841 0.0053
0 16 3 19.0577 0.0239
0 16 4 2.2307 0.0556
0 16 5 -4.6558 0.0320
0 16 6 -4.1241 -0.0081
0 16 7 -4.5076 -0.0244
0 16 8 1.8576 -0.0537
0 16 9 -2.2865 -0.0085
0 16 10 1.7237 0.0107
0 16 11 -5.6061 0.0026
0 16 12 -3.2552 0.0500
0 16 13 -0.7270 0.0003
0 16 14 -0.0543 -0.0026
0 16 15 2.9022 0.0038
0 16 16 4.3584 -0.0435
0 16 17 9.5227 -0.0041
0 16 18 3.5674 0.0112
0 16 19 -2.1456 0.0051
0 16 20 -8.2232 0.0280
0 16 21 -7.3139 0.0122
0 16 22 -0.4406 -0.0169
0 16 23 -0.9953 -0.0213
0 16 24 3.8710 -0.0143
0 16 25 4.1436 -0.0093
0 16 26 -0.3022 0.0107
0 16 27 -2.7090 0.0241
0 16 28 -1.1655 0.0117
0 16 29 0.8568 -0.0030
0 16 30 -0.0585 -0.0109
0 16 31 4.0355 -0.0178
0 17 1 0.0819 -11.7996
0 17 2 0.0201 0.4160
0 17 3 -0.0435 4.6251
0 17 4 -0.0089 -4.6256
0 17 5 -0.0642 8.9652
0 17 6 -0.0296 -6.5742
0 17 7 0.0678 2.1306
0 17 8 0.0156 5.1664
0 17 9 0.0190 1.1870
0 17 10 0.0391 12.1525
0 17 11 -0.0784 -1.8271
0 17 12 -0.0179 -8.2315
0 17 13 0.0172 -3.4405
0 17 14 -0.0344 -7.2376
0 17 15 0.0770 -5.7298
0 17 16 0.0175 3.1157
0 17 17 -0.0291 0.5645
0 17 18 0.0128 6.1307
0 17 19 -0.0667 8.6137
0 17 20 -0.0250 -2.5786
0 17 21 0.0347 1.5479
0 17 22 0.0158 -2.9231
0 17 23 0.0502 -6.3778
0 17 24 0.0067 5.4126
0 17 25 -0.0483 0.9941
0 17 26 -0.0162 -1.5213
0 17 27 -0.0300 0.9233
0 17 28 -0.0038 -2.8717
0 17 29 0.0535 -3.6132
0 17 30 0.0157 -0.9501
0 18 0 -8.8602 0.0749
0 18 1 7.0612 -0.0109
0 18 2 -4.1489 -0.0198
0 18 3 6.1911 -0.0217
0 18 4 4.6007 -0.0443
0 18 5 -0.5075 0.0099
0 18 6 5.3341 0.0267
0 18 7 -2.6052 0.0274
0 18 8 4.8402 0.0204
0 18 9 -2.5661 -0.0124
0 18 10 -2.2419 -0.0256
0 18 11 -0.9091 -0.0357
0 18 12 -6.1974 -0.0066
0 18 13 -0.9217 0.0188
0 18 14 -3.9654 0.0354
0 18 15 -1.2630 0.0184
0 18 16 4.2407 -0.0001
0 18 17 3.9401 -0.0131
0 18 18 6.3190 -0.0299
0 18 19 6.6709 0.0087
0 18 20 -2.9757 -0.0052
0 18 21 -6.9469 0.0060
0 18 22 -0.3340 0.0308
0 18 23 -3.2756 -0.0126
0 18 24 -0.8625 -0.0107
0 18 25 5.0013 -0.0033
0 18 26 -1.4026 -0.0178
0 18 27 -1.5098 0.0063
0 18 28 -1.0314 0.0234
0 18 29 -1.7704 0.0036
0 19 1 -0.0204 -6.1515
0 19 2 0.0761 -4.7948
0 19 3 0.0158 8.9054
0 19 4 -0.0294 -7.6746
0 19 5 0.0098 1.7858
0 19 6 -0.0805 -4.3215
0 19 7 -0.0107 -6.3470
0 19 8 0.0486 8.5142
0 19 9 -0.0190 -1.0110
0 19 10 0.0682 8.9301
0 19 11 0.0188 7.6309
0 19 12 -0.0494 -1.2171
0 19 13 0.0147 -0.9090
0 19 14 -0.0556 -6.6481
0 19 15 -0.0127 -6.3640
0 19 16 0.0537 -3.2171
0 19 17 0.0133 -4.1013
0 19 18 0.0319 1.6249
0 19 19 -0.0059 7.8196
0 19 20 -0.0604 0.1835
0 19 21 -0.0272 2.0961
0 19 22 -0.0152 2.7011
0 19 23 0.0216 -7.5588
0 19 24 0.0684 2.3255
0 19 25 0.0082 3.9852
0 19 26 -0.0006 -1.3645
0 19 27 -0.0168 2.8637
0 19 28 -0.0668 -3.4634
0 19 29 -0.0043 -5.0894
0 20 0 -7.2797 0.0664
0 20 1 2.3045 0.0553
0 20 2 -2.8848 0.0298
0 20 3 -4.1546 0.0250
0 20 4 0.9336 -0.0709
0 20 5 -4.3428 -0.0613
0 20 6 8.3506 -0.0053
0 20 7 2.0664 -0.0086
0 20 8 5.5945 0.0697
0 20 9 2.8761 0.0555
0 20 10 -3.2425 -0.0270
0 20 11 2.4540 -0.0128
0 20 12 -7.2886 -0.0581
0 20 13 -0.0794 -0.0410
0 20 14 -3.6047 0.0495
0 20 15 -8.5185 0.0120
0 20 16 3.2528 0.0407
0 20 17 0.9266 0.0378
0 20 18 0.8029 -0.0522
0 20 19 8.9578 0.0028
0 20 20 4.2867 -0.0235
0 20 21 -5.5231 -0.0344
0 20 22 0.1228 0.0415
0 20 23 -0.1893 0.0128
0 20 24 -3.0408 0.0028
0 20 25 3.7497 0.0162
0 20 26 -2.2504 -0.0217
0 20 27 -2.3078 -0.0223
0 20 28 0.7085 0.0052
0 21 1 -0.0551 2.0468
0 21 2 -0.0110 -4.8853
0 21 3 0.0651 6.6893
0 21 4 -0.0159 -2.3882
0 21 5 0.0282 -4.2374
0 21 6 0.0092 -0.4427
0 21 7 -0.0565 -11.7369
0 21 8 0.0043 2.7351
0 21 9 -0.0174 0.0555
0 21 10 -0.0128 3.3861
0 21 11 0.0525 7.6404
0 21 12 0.0094 4.7061
0 21 13 0.0114 5.8900
0 21 14 0.0139 -4.1922
0 21 15 -0.0445 -2.4627
0 21 16 -0.0169 -2.7019
0 21 17 0.0125 -7.5048
0 21 18 -0.0069 -4.1499
0 21 19 0.0337 3.9990
0 21 20 0.0209 2.2037
0 21 21 -0.0234 -0.0488
0 21 22 -0.0116 4.2157
0 21 23 -0.0332 -4.3040
0 21 24 0.0010 -0.7095
0 21 25 0.0246 3.8621
0 21 26 0.0169 0.3115
0 21 27 0.0193 2.8760
0 22 0 2.8782 -0.0327
0 22 1 -2.2323 0.0296
0 22 2 0.3801 0.0089
0 22 3 -6.4078 0.0341
0 22 4 -3.5705 0.0249
0 22 5 -7.8269 -0.0488
0 22 6 1.7328 -0.0092
0 22 7 3.4500 -0.0263
0 22 8 3.8835 -0.0181
0 22 9 8.0938 0.0574
0 22 10 -0.5395 0.0048
0 22 11 5.0237 0.0048
0 22 12 -5.2593 0.0041
0 22 13 -1.1026 -0.0468
0 22 14 2.1838 -0.0071
0 22 15 -10.1012 -0.0009
0 22 16 -1.9301 0.0067
0 22 17 0.2348 0.0395
0 22 18 -2.3189 -0.0013
0 22 19 3.2177 0.0071
0 22 20 6.6304 -0.0080
0 22 21 -1.8271 -0.0293
0 22 22 -1.5764 -0.0029
0 22 23 2.0741 0.0014
0 22 24 -0.4515 0.0093
0 22 25 2.6718 0.0280
0 22 26 -3.4037 0.0056
0 23 1 -0.0203 4.2919
0 23 2 -0.0348 2.0832
0 23 3 0.0037 2.0549
0 23 4 0.0087 3.6768
0 23 5 0.0157 -3.6263
0 23 6 0.0257 2.9284
0 23 7 -0.0051 -8.5818
0 23 8 -0.0146 -6.3074
0 23 9 -0.0111 -1.3724
0 23 10 -0.0204 -0.6106
0 23 11 0.0071 3.4617
0 23 12 0.0060 3.3050
0 23 13 0.0064 8.7103
0 23 14 0.0280 0.1594
0 23 15 -0.0035 1.1257
0 23 16 -0.0071 1.4797
0 23 17 -0.0043 -4.7519
0 23 18 -0.0266 -5.0620
0 23 19 -0.0027 -1.7189
0 23 20 0.0198 2.3471
0 23 21 0.0128 -0.5532
0 23 22 0.0262 0.9270
0 23 23 -0.0048 -1.5767
0 23 24 -0.0260 0.6448
0 24 0 9.9719 -0.0224
0 24 1 0.8601 0.0008
0 24 2 1.7757 -0.0061
0 24 3 -0.6011 -0.0379
0 24 4 -2.8429 0.0240
0 24 5 -6.2022 0.0089
0 24 6 -6.1484 0.0031
0 24 7 -0.0647 0.0293
0 24 8 -1.2813 -0.0255
0 24 9 6.7480 -0.0180
0 24 10 3.3582 0.0039
0 24 11 4.3213 -0.0175
0 24 12 -0.3480 0.0081
0 24 13 -2.2007 0.0350
0 24 14 4.2360 -0.0060
0 24 15 -3.1796 -0.0009
0 24 16 -3.0837 -0.0033
0 24 17 -1.8441 -0.0358
0 24 18 -1.2282 -0.0044
0 24 19 -1.2719 0.0146
0 24 20 0.6957 0.0037
0 24 21 0.7434 0.0304
0 24 22 -0.6195 0.0049
0 24 23 1.1341 -0.0311
0 25 1 0.0001 0.1593
0 25 2 0.0107 3.6541
0 25 3 -0.0147 -1.2974
0 25 4 -0.0085 4.7520
0 25 5 0.0026 -0.0168
0 25 6 -0.0071 4.5814
0 25 7 0.0106 2.3243
0 25 8 0.0071 -7.5427
0 25 9 -0.0020 -3.4264
0 25 10 0.0077 -2.7103
0 25 11 0.0001 -1.6830
0 25 12 -0.0168 -0.2826
0 25 13 -0.0068 4.6417
0 25 14 0.0001 1.7174
0 25 15 -0.0078 2.4157
0 25 16 0.0266 3.1925
0 25 17 0.0027 -0.8111
0 25 18 -0.0002 0.5817
0 25 19 0.0004 -1.8325
0 25 20 -0.0331 -1.0503
0 25 21 -0.0053 -0.4054
0 25 22 0.0288 -1.7339
0 26 0 3.4002 0.0358
0 26 1 3.4018 0.0097
0 26 2 1.5002 0.0026
0 26 3 3.2464 -0.0065
0 26 4 1.4455 -0.0399
0 26 5 1.5559 -0.0101
0 26 6 -5.7537 0.0108
0 26 7 -2.6285 0.0110
0 26 8 -3.2217 0.0259
0 26 9 -0.9254 0.0114
0 26 10 3.5721 -0.0122
0 26 11 1.7411 -0.0109
0 26 12 1.3520 -0.0324
0 26 13 0.1124 -0.0016
0 26 14 0.2770 0.0232
0 26 15 1.0707 0.0164
0 26 16 1.8665 0.0257
0 26 17 -1.0949 -0.0104
0 26 18 0.2278 -0.0323
0 26 19 -0.1479 -0.0251
0 26 20 -5.0417 -0.0152
0 27 1 -0.0023 -0.8437
0 27 2 0.0124 1.5540
0 27 3 0.0177 -4.4388
0 27 4 0.0123 -0.0345
0 27 5 -0.0086 0.6643
0 27 6 -0.0208 -0.3337
0 27 7 -0.0047 8.2692
0 27 8 -0.0012 1.1882
0 27 9 0.0024 -1.8258
0 27 10 0.0269 -0.4567
0 27 11 0.0055 -3.9610
0 27 12 -0.0099 -2.6301
0 27 13 -0.0044 -0.1527
0 27 14 -0.0190 -0.2465
0 27 15 -0.0213 1.6916
0 27 16 0.0218 1.3210
0 27 17 0.0012 0.1132
0 27 18 0.0211 3.8533
0 28 0 -2.7761 0.0174
0 28 1 0.3494 0.0244
0 28 2 -0.2796 -0.0120
0 28 3 1.8967 0.0312
0 28 4 0.5759 -0.0135
0 28 5 4.5998 -0.0383
0 28 6 1.3154 0.0118
0 28 7 -1.6944 -0.0148
0 28 8 0.2241 -0.0060
0 28 9 -3.1139 0.0412
0 28 10 0.1673 0.0069
0 28 11 0.2167 0.0045
0 28 12 -0.9780 0.0089
0 28 13 2.9965 -0.0406
0 28 14 -2.3846 -0.0164
0 28 15 -1.3181 0.0051
0 28 16 4.6897 -0.0009
0 29 1 -0.0202 0.0016
0 29 2 -0.0175 2.6567
0 29 3 0.0161 -1.8496
0 29 4 0.0195 -4.2454
0 29 5 0.0031 -0.3879
0 29 6 0.0053 -5.3436
0 29 7 -0.0024 0.7121
0 29 8 -0.0118 5.9382
0 29 9 -0.0060 2.1691
0 29 10 0.0057 2.4880
0 29 11 0.0001 -1.2391
0 29 12 0.0066 -1.8494
0 29 13 0.0079 -1.7280
0 30 0 -1.8803 0.0031
0 30 1 -1.0787 -0.0084
0 30 2 -1.5905 0.0034
0 30 3 0.1200 0.0011
0 30 4 -1.1774 -0.0096
0 30 5 -0.3229 -0.0049
0 30 6 3.3404 0.0029
0 30 7 0.6351 -0.0034
0 30 8 0.9145 0.0050
0 30 9 -0.1127 -0.0005
0 30 10 0.0447 -0.0062
0 31 1 -0.0166 -0.9669
0 31 2 -0.0172 2.7088
0 31 3 0.0269 3.4658
0 31 4 -0.0098 -2.4949
0 31 5 -0.0086 -0.8293
1 0 1 0.1202 105.1864
1 0 3 0.1073 63.7967
1 0 4 36.6460 0.8053
1 0 5 -0.4442 -80.8273
1 0 6 -6.6920 2.1551
1 0 7 0.0109 -20.3387
1 0 8 -31.0812 -1.0157
1 0 9 0.3990 43.0012
1 0 10 -5.0922 -1.7590
1 0 11 -0.1662 -5.7322
1 0 12 15.8731 1.2915
1 0 13 -0.2864 -31.4542
1 0 14 0.7131 1.2912
1 0 15 0.2291 20.3338
1 0 16 7.2321 -1.4329
1 0 17 0.1611 23.7604
1 0 18 0.5941 -0.8095
1 0 19 -0.1761 -15.9613
1 0 20 -8.9709 1.3792
1 0 21 -0.0307 -16.8327
1 0 22 0.8824 0.4156
1 0 23 0.0454 11.0767
1 0 24 -1.3777 -1.1755
1 0 25 0.0880 6.4172
1 0 26 5.1232 -0.1695
1 0 27 -0.1209 -5.0438
1 0 28 -1.1748 0.9977
1 0 29 -0.0376 -2.0586
1 0 30 -1.0151 -0.0821
1 0 31 0.0982 4.4537
1 0 32 1.9439 -0.7384
1 0 33 0.0200 0.7927
1 0 34 -1.6098 0.2171
1 0 35 -0.0866 -7.0857
1 0 36 -0.2883 0.4983
1 1 0 -1.0795 28.7288
1 1 1 63.6806 8.9552
1 1 2 23.1956 -25.2512
1 1 3 -64.5215 -8.8020
1 1 4 6.5926 -9.6242
1 1 5 -31.9225 -6.7882
1 1 6 -7.6776 43.8776
1 1 7 28.8773 11.8865
1 1 8 -12.0255 2.4509
1 1 9 13.3667 7.8845
1 1 10 -1.0789 -32.8349
1 1 11 -14.5458 -2.7415
1 1 12 4.0043 -4.4321
1 1 13 2.0154 -6.9956
1 1 14 3.7898 11.6790
1 1 15 13.3025 1.2598
1 1 16 0.6159 -2.6774
1 1 17 -5.6471 -2.1961
1 1 18 -0.0930 4.2820
1 1 19 -11.4434 1.1907
1 1 20 0.9589 -1.1597
1 1 21 2.4372 0.3196
1 1 22 -3.1663 2.6328
1 1 23 6.7632 1.5828
1 1 24 -1.4321 -3.3724
1 1 25 0.6583 0.5228
1 1 26 2.1882 -4.5190
1 1 27 -2.0561 -1.7684
1 1 28 1.2103 4.9743
1 1 29 -3.4484 -0.2330
1 1 30 -1.6888 -0.1048
1 1 31 4.2736 -0.1665
1 1 32 0.9021 -1.1425
1 1 33 -1.8408 0.5661
1 1 34 1.1438 1.1685
1 1 35 -2.2014 -0.5983
1 1 36 -2.2398 -0.6685
1 2 0 -0.1100 -79.0348
1 2 1 -7.0834 70.2834
1 2 2 -15.4435 3.6570
1 2 3 -6.4635 40.8307
1 2 4 28.1219 55.2506
1 2 5 26.6145 -59.1411
1 2 6 4.3655 -2.9931
1 2 7 0.2543 -11.1952
1 2 8 -27.5012 -19.9595
1 2 9 -7.8056 35.8586
1 2 10 -2.7098 8.6332
1 2 11 -8.2789 -3.3814
1 2 12 11.5007 1.0391
1 2 13 -2.1452 -25.0131
1 2 14 0.4907 -19.6039
1 2 15 -2.6210 9.8769
1 2 16 3.2169 2.9630
1 2 17 4.4714 19.0238
1 2 18 -1.4335 15.3832
1 2 19 7.2650 -10.3526
1 2 20 -3.6989 2.1108
1 2 21 -2.6359 -13.0052
1 2 22 0.6596 -8.7737
1 2 23 -2.0359 8.8049
1 2 24 -1.5407 -1.0923
1 2 25 -2.4549 5.1353
1 2 26 3.7577 4.0272
1 2 27 2.1080 -3.9365
1 2 28 0.1642 -1.8976
1 2 29 -0.7714 -2.0883
1 2 30 -2.4278 -2.2521
1 2 31 0.0624 3.4470
1 2 32 1.5500 2.7737
1 2 33 1.1437 0.1232
1 2 34 -0.3445 2.0423
1 2 35 -0.2729 -4.5864
1 2 36 -1.0698 -2.3406
1 3 0 -0.4913 15.6027
1 3 1 34.7473 13.9428
1 3 2 47.3973 -10.5326
1 3 3 -45.7757 -21.3208
1 3 4 13.1330 -14.8863
1 3 5 -13.9752 -17.0545
1 3 6 -17.5831 24.0092
1 3 7 40.3610 26.0111
1 3 8 -19.3410 3.6092
1 3 9 1.6155 17.2692
1 3 10 -1.5035 -15.7393
1 3 11 -27.0586 -6.2534
1 3 12 4.2925 3.6679
1 3 13 -0.9275 -11.5856
1 3 14 5.1960 2.9672
1 3 15 17.8125 0.8988
1 3 16 4.3276 0.5211
1 3 17 -1.7955 -3.1504
1 3 18 1.9517 -0.8283
1 3 19 -12.3959 0.7022
1 3 20 -1.2376 -1.2354
1 3 21 6.2631 0.9915
1 3 22 -6.2641 1.1525
1 3 23 6.0596 4.9896
1 3 24 -1.5874 -1.0519
1 3 25 -3.8082 0.0478
1 3 26 3.8246 -2.0892
1 3 27 -2.6359 -5.0424
1 3 28 1.7689 3.1474
1 3 29 0.6445 0.7403
1 3 30 -2.1737 0.6130
1 3 31 2.0774 0.8469
1 3 32 1.1398 -2.6868
1 3 33 -2.1933 -0.7527
1 3 34 2.1459 1.3841
1 3 35 1.2845 -0.1328
1 3 36 -2.6502 -1.4210
1 4 0 0.4434 -75.9135
1 4 1 -11.0278 6.5619
1 4 2 -26.8211 0.5518
1 4 3 -9.0706 -0.1185
1 4 4 11.0191 55.1280
1 4 5 28.0902 -20.1184
1 4 6 20.8442 -2.1441
1 4 7 9.4840 1.9314
1 4 8 -17.1449 -20.0822
1 4 9 -10.9665 22.0807
1 4 10 2.5116 11.0835
1 4 11 -7.3615 4.9983
1 4 12 6.3432 2.2733
1 4 13 -4.3846 -11.4450
1 4 14 -1.4769 -20.1190
1 4 15 -2.2603 -10.4614
1 4 16 -5.6406 -1.8692
1 4 17 5.7641 6.5182
1 4 18 -3.4817 18.0935
1 4 19 5.0188 2.0873
1 4 20 4.0487 4.4088
1 4 21 -0.6258 -3.9797
1 4 22 2.4417 -10.5547
1 4 23 -2.6216 2.6526
1 4 24 -1.6187 -1.9130
1 4 25 -3.6366 2.8506
1 4 26 -0.8613 5.1484
1 4 27 1.9137 -0.3899
1 4 28 2.7758 -2.2631
1 4 29 1.2594 -3.4429
1 4 30 -2.7192 -3.4974
1 4 31 -1.5551 0.9177
1 4 32 -1.0180 4.1100
1 4 33 0.6406 1.0397
1 4 34 1.9540 1.2102
1 4 35 0.7591 -1.9713
1 4 36 -0.4957 -1.8321
1 5 0 -0.4804 19.5632
1 5 1 4.9740 4.0390
1 5 2 37.2226 2.3700
1 5 3 -26.6512 -16.3682
1 5 4 7.6896 -20.6567
1 5 5 4.1409 -17.8710
1 5 6 -21.0815 0.6399
1 5 7 45.7036 20.2429
1 5 8 -2.0616 0.7247
1 5 9 -4.2665 12.5692
1 5 10 4.8804 1.2338
1 5 11 -34.4097 -6.8447
1 5 12 -3.9259 9.7130
1 5 13 -4.5158 -2.2860
1 5 14 -4.2455 0.1152
1 5 15 15.9941 -1.6632
1 5 16 7.6997 0.2589
1 5 17 1.9217 -0.2165
1 5 18 6.6020 -3.7904
1 5 19 -7.7052 -1.1381
1 5 20 -6.1413 -2.4416
1 5 21 7.4936 1.2168
1 5 22 -4.4684 -1.2678
1 5 23 4.1872 3.8944
1 5 24 1.0876 3.8451
1 5 25 -7.0688 0.0737
1 5 26 2.5136 0.3585
1 5 27 -3.5496 -4.4015
1 5 28 -0.8107 -0.7091
1 5 29 3.9156 0.1642
1 5 30 -0.2439 1.3495
1 5 31 1.1643 2.8712
1 5 32 1.7259 -1.5000
1 5 33 -3.8919 -2.2628
1 5 34 0.8278 -0.8306
1 5 35 3.4357 0.0813
1 6 1 -0.6066 -20.8543
1 6 2 -38.5679 -4.5435
1 6 3 -13.3248 -21.4511
1 6 4 -0.1724 14.3631
1 6 5 8.2708 -2.4274
1 6 6 18.9973 0.1809
1 6 7 16.5962 5.8825
1 6 8 -2.4832 -8.5137
1 6 9 -10.2093 14.5518
1 6 10 4.6182 4.5112
1 6 11 -1.6293 9.8186
1 6 12 6.0938 5.7432
1 6 13 0.2282 -3.5155
1 6 14 -3.1956 -2.7346
1 6 15 0.7967 -15.3114
1 6 16 -11.2126 -8.8868
1 6 17 1.3495 -4.8714
1 6 18 -1.6728 5.5230
1 6 19 -1.7084 7.0597
1 6 20 5.2055 4.9383
1 6 21 0.9715 2.9368
1 6 22 5.3118 -3.4854
1 6 23 0.1917 0.1086
1 6 24 -1.6469 -2.6416
1 6 25 -1.2239 1.2369
1 6 26 -3.6458 2.6233
1 6 27 -1.9707 0.9072
1 6 28 2.4549 0.5848
1 6 29 2.8775 -3.3549
1 6 30 -0.6364 -4.1742
1 6 31 -0.7024 -1.0673
1 6 32 -2.6378 2.2403
1 6 33 -1.8720 1.4019
1 6 34 1.9920 2.1575
1 6 35 1.1049 -1.7419
1 7 0 -0.3404 33.4933
1 7 1 -7.3518 3.9726
1 7 2 10.3298 2.5531
1 7 3 -12.6152 2.0913
1 7 4 -6.3704 -18.6011
1 7 5 8.5810 -9.1217
1 7 6 -17.5616 -9.3435
1 7 7 30.2475 4.9288
1 7 8 17.2406 -2.5337
1 7 9 0.7355 -1.3394
1 7 10 14.9376 7.1264
1 7 11 -25.1427 -6.6204
1 7 12 -10.9397 4.4751
1 7 13 -3.9736 5.8865
1 7 14 -13.6614 4.2379
1 7 15 6.6261 1.3176
1 7 16 7.2439 -1.1832
1 7 17 1.8749 1.0170
1 7 18 7.2235 -3.2602
1 7 19 -0.2005 -0.9869
1 7 20 -7.3684 -3.5819
1 7 21 4.2118 0.1399
1 7 22 -0.2642 -0.5905
1 7 23 3.0414 -1.3572
1 7 24 4.4190 5.0148
1 7 25 -6.2985 1.6469
1 7 26 -0.0361 0.8470
1 7 27 -3.6110 -0.2417
1 7 28 -4.2390 -0.7875
1 7 29 3.4374 -1.4092
1 7 30 1.5992 -0.4203
1 7 31 0.1914 2.0072
1 7 32 3.4891 0.7355
1 7 33 -3.0927 -0.6677
1 7 34 -2.6271 -1.2309
1 7 35 3.9615 -1.0196
1 8 0 -0.2043 37.3174
1 8 1 18.5551 -3.9407
1 8 2 -28.9952 -1.7888
1 8 3 -17.9245 -9.5480
1 8 4 0.2626 -21.4391
1 8 5 -10.4260 -8.2187
1 8 6 3.4364 -1.1004
1 8 7 8.4718 -1.1688
1 8 8 5.3319 -0.1857
1 8 9 -3.9103 14.3909
1 8 10 1.5687 -1.5105
1 8 11 0.5409 5.8058
1 8 12 4.4347 9.2033
1 8 13 7.3159 -5.7520
1 8 14 -1.2288 8.6274
1 8 15 4.0138 -3.0589
1 8 16 -7.7454 -8.1681
1 8 17 -4.4154 -4.6296
1 8 18 0.9177 -6.3475
1 8 19 -5.2558 1.6746
1 8 20 2.2262 1.8471
1 8 21 -0.3228 1.3334
1 8 22 4.0669 2.0541
1 8 23 4.5405 2.3456
1 8 24 -1.6420 -0.9764
1 8 25 1.1757 1.9490
1 8 26 -0.6255 1.0824
1 8 27 -3.2290 -0.9981
1 8 28 -0.1271 1.9089
1 8 29 1.2383 -1.2640
1 8 30 -0.7769 -2.7057
1 8 31 0.4566 -1.7075
1 8 32 -0.7259 0.2672
1 8 33 -1.4950 -0.7721
1 8 34 0.7025 2.3486
1 8 35 0.1537 -0.0404
1 9 0 0.1554 24.2626
1 9 1 1.4122 14.5665
1 9 2 -12.4667 -4.5557
1 9 3 -5.5551 15.3267
1 9 4 -12.9809 -8.1927
1 9 5 -2.5793 1.0610
1 9 6 -6.7328 0.7375
1 9 7 6.9656 -6.0321
1 9 8 17.0911 -0.9902
1 9 9 6.2583 -10.2259
1 9 10 18.5008 0.6597
1 9 11 -6.2667 -3.6011
1 9 12 -10.6046 -3.7337
1 9 13 -0.1008 4.0160
1 9 14 -13.6311 5.3270
1 9 15 -2.6255 5.8024
1 9 16 3.9289 0.1196
1 9 17 0.0505 0.5758
1 9 18 3.2871 -2.5660
1 9 19 3.4881 0.2497
1 9 20 -4.0217 -1.7878
1 9 21 -0.7097 -3.0983
1 9 22 1.6806 2.0770
1 9 23 2.0238 -3.1655
1 9 24 6.3543 1.1153
1 9 25 -1.1177 2.0959
1 9 26 -1.4683 -0.9963
1 9 27 -2.6509 1.7584
1 9 28 -5.0158 2.4421
1 9 29 0.3045 0.7125
1 9 30 1.8810 -0.7036
1 9 31 -0.3179 -1.2418
1 9 32 2.3837 -0.6901
1 9 33 0.2663 0.0181
1 9 34 -4.7094 0.1461
1 10 0 -0.1533 35.4823
1 10 1 22.9014 23.4097
1 10 2 -0.6903 3.3838
1 10 3 -15.0158 18.0970
1 10 4 7.7041 -23.0118
1 10 5 -11.7900 -19.3511
1 10 6 -5.9530 -3.2634
1 10 7 -2.5529 -10.5095
1 10 8 -2.6258 -1.3791
1 10 9 0.9346 14.0568
1 10 10 -0.0852 -0.1247
1 10 11 -0.4840 -1.1721
1 10 12 0.3270 9.9340
1 10 13 8.9616 -8.3788
1 10 14 1.0699 3.7691
1 10 15 3.1271 7.5784
1 10 16 0.0812 -2.6492
1 10 17 -5.9336 3.2163
1 10 18 2.0576 -5.9290
1 10 19 -4.2844 -4.6230
1 10 20 -0.7357 -1.4421
1 10 21 -0.5886 -3.6901
1 10 22 -1.1190 0.2307
1 10 23 5.4669 2.7488
1 10 24 -0.2621 1.5855
1 10 25 0.8600 3.1317
1 10 26 2.2105 2.1139
1 10 27 -0.4123 -1.8627
1 10 28 0.3388 0.5451
1 10 29 -0.1457 -0.6317
1 10 30 -2.2556 -0.1571
1 10 31 -1.0375 0.1082
1 10 32 -0.5420 -0.1665
1 10 33 0.3634 -1.2213
1 10 34 1.3700 -0.1591
1 11 0 0.0264 -3.4453
1 11 1 16.4384 14.5747
1 11 2 -12.1381 -7.6847
1 11 3 -6.7781 10.8891
1 11 4 -7.0608 1.0158
1 11 5 -15.3415 0.8599
1 11 6 0.5844 15.1102
1 11 7 -3.4537 -3.5562
1 11 8 4.6638 3.4554
1 11 9 5.0011 -4.5336
1 11 10 10.7730 -8.1228
1 11 11 6.8956 -3.4333
1 11 12 -4.0069 -5.9649
1 11 13 2.7853 -0.5191
1 11 14 -5.2025 1.6786
1 11 15 -4.6971 6.3629
1 11 16 -0.9544 2.9125
1 11 17 -1.6360 0.8775
1 11 18 -1.2107 -2.0914
1 11 19 1.0654 -1.2285
1 11 20 1.0730 1.9668
1 11 21 -2.7769 -4.4348
1 11 22 1.2974 1.4576
1 11 23 0.8213 -0.4425
1 11 24 3.4962 -2.3035
1 11 25 3.7401 1.4167
1 11 26 -0.5932 -2.8437
1 11 27 -1.3978 0.3482
1 11 28 -2.5531 2.8960
1 11 29 -1.0021 2.1424
1 11 30 0.4609 2.3535
1 11 31 0.4237 -0.4292
1 11 32 0.5063 -2.4694
1 11 33 1.1048 -1.5941
1 11 34 -3.7547 -1.3268
1 12 0 0.1991 -0.7024
1 12 1 7.0071 27.6385
1 12 2 16.7350 3.8784
1 12 3 -5.0576 28.9308
1 12 4 10.0089 1.3327
1 12 5 -1.3611 -17.6105
1 12 6 -3.1194 -4.3459
1 12 7 -0.1244 -12.4598
1 12 8 -10.4594 -6.4529
1 12 9 -2.7815 7.5692
1 12 10 -1.1645 4.4181
1 12 11 -0.8299 -3.5965
1 12 12 -2.9207 6.1911
1 12 13 5.7077 -5.5752
1 12 14 3.5777 -4.5551
1 12 15 -0.5188 7.5039
1 12 16 4.2351 0.5089
1 12 17 -3.6972 8.8532
1 12 18 0.6049 1.9704
1 12 19 -0.9000 -4.7946
1 12 20 -2.4626 -2.3385
1 12 21 1.1973 -6.3262
1 12 22 -4.1177 -3.8187
1 12 23 1.1584 -0.6423
1 12 24 0.8604 2.5366
1 12 25 1.0197 3.7061
1 12 26 2.6104 2.9715
1 12 27 -0.0444 -0.9182
1 12 28 2.0875 -1.3786
1 12 29 0.7458 -1.4281
1 12 30 -1.9627 -0.5008
1 12 31 -0.7927 2.5603
1 12 32 -1.4312 1.3997
1 12 33 -1.2345 0.4029
1 13 0 -0.0836 -14.7089
1 13 1 16.8135 1.4832
1 13 2 2.8911 -4.6026
1 13 3 -5.8378 -0.2253
1 13 4 1.0768 2.5990
1 13 5 -16.0708 -6.5185
1 13 6 0.1869 13.4796
1 13 7 -2.3611 3.0281
1 13 8 -3.3055 5.7507
1 13 9 2.0555 7.1953
1 13 10 -1.5206 -6.0669
1 13 11 5.6144 -4.2984
1 13 12 2.7392 -5.6566
1 13 13 3.2344 -2.6997
1 13 14 2.8373 -2.4567
1 13 15 2.2999 2.2097
1 13 16 -2.9737 4.5212
1 13 17 -2.9561 2.9785
1 13 18 -2.1821 0.6557
1 13 19 -5.5454 -3.9366
1 13 20 2.0523 2.1281
1 13 21 -1.6697 -1.1843
1 13 22 0.2847 -0.9338
1 13 23 2.6622 1.7609
1 13 24 -0.5711 -3.1641
1 13 25 3.2020 0.6623
1 13 26 0.1368 -2.5703
1 13 27 -1.2694 -1.1873
1 13 28 -0.3041 2.6265
1 13 29 0.3790 -0.5167
1 13 30 0.7135 1.9449
1 13 31 0.6090 2.7068
1 13 32 0.6890 -0.8286
1 13 33 0.6345 -1.2100
1 14 0 0.0693 -21.3043
1 14 1 -7.4264 9.9393
1 14 2 9.6138 0.2504
1 14 3 1.8609 16.3461
1 14 4 5.6200 16.4390
1 14 5 4.3860 -3.5727
1 14 6 1.2686 -2.0080
1 14 7 7.6389 -8.1223
1 14 8 -5.7362 -6.0871
1 14 9 -4.8781 -0.4060
1 14 10 -3.2193 4.4473
1 14 11 -0.4283 -1.1442
1 14 12 -3.1482 0.5849
1 14 13 -1.1863 -2.5034
1 14 14 4.2858 -6.7823
1 14 15 -1.1726 2.5848
1 14 16 4.1076 -0.6927
1 14 17 0.5744 7.8587
1 14 18 -1.9937 8.1304
1 14 19 1.2769 0.6096
1 14 20 -2.3988 0.5370
1 14 21 1.7380 -5.6055
1 14 22 -1.5835 -5.6540
1 14 23 -3.2180 -4.5697
1 14 24 -1.0498 0.6129
1 14 25 0.8460 4.0488
1 14 26 4.0708 3.2524
1 14 27 -1.1075 0.9445
1 14 28 0.9329 -2.6329
1 14 29 1.7972 -2.1854
1 14 30 -2.2041 -2.4339
1 14 31 0.5654 1.0314
1 14 32 0.8870 3.7045
1 15 0 0.0857 -3.5084
1 15 1 7.6282 -4.9389
1 15 2 9.0953 -1.6789
1 15 3 -2.5719 -4.2932
1 15 4 5.4221 0.8579
1 15 5 -9.0171 -9.6541
1 15 6 -1.6746 2.5187
1 15 7 2.1500 3.2473
1 15 8 -4.6419 2.1882
1 15 9 2.3166 10.0270
1 15 10 -6.5438 1.0100
1 15 11 -4.6312 -0.0762
1 15 12 2.8896 -2.3586
1 15 13 2.3281 -2.4426
1 15 14 3.5861 -3.8254
1 15 15 9.3930 -3.4558
1 15 16 1.2753 1.5442
1 15 17 -2.3479 3.1822
1 15 18 1.6577 4.5299
1 15 19 -8.3282 -2.2203
1 15 20 -1.9903 -1.8343
1 15 21 -0.9017 1.8210
1 15 22 -2.3559 -1.0328
1 15 23 5.0306 1.8606
1 15 24 0.0360 -1.7278
1 15 25 0.1001 -0.4078
1 15 26 -0.0319 -0.8209
1 15 27 -2.2439 -2.6829
1 15 28 -0.4833 3.3602
1 15 29 0.7281 -0.8091
1 15 30 2.2257 -1.5165
1 15 31 1.5438 2.4668
1 16 0 -0.0509 -14.9282
1 16 1 -6.3931 -1.8561
1 16 2 -2.9812 -3.0974
1 16 3 -0.9233 1.8404
1 16 4 0.5633 11.8106
1 16 5 4.5732 3.4933
1 16 6 0.8364 3.0810
1 16 7 7.7589 -2.9081
1 16 8 0.9250 -1.8781
1 16 9 -1.7825 -1.2445
1 16 10 -2.2447 0.7403
1 16 11 0.1149 1.6427
1 16 12 0.6116 -2.4102
1 16 13 -5.2776 -1.8664
1 16 14 0.0764 -4.8672
1 16 15 -1.2492 -1.8421
1 16 16 1.5185 -2.7812
1 16 17 4.3001 2.0580
1 16 18 -2.3244 6.6366
1 16 19 1.1530 5.4050
1 16 20 -0.2406 5.3760
1 16 21 -0.7401 -2.1543
1 16 22 2.3845 -3.6458
1 16 23 -2.0242 -4.8481
1 16 24 -2.8269 -2.9729
1 16 25 -1.5611 2.6212
1 16 26 3.6563 2.7303
1 16 27 0.3327 2.3028
1 16 28 -0.8559 -1.1356
1 16 29 2.3962 -2.4691
1 16 30 -2.5230 -2.6699
1 16 31 -0.8352 -2.0884
1 17 0 -0.0190 4.9449
1 17 1 2.0911 0.5429
1 17 2 8.9728 1.0056
1 17 3 -3.5755 -3.4635
1 17 4 4.7689 0.0847
1 17 5 -1.5419 -6.0378
1 17 6 -4.4258 -4.4626
1 17 7 6.7460 2.1921
1 17 8 -2.2556 -1.8921
1 17 9 1.9675 3.5316
1 17 10 -1.8013 2.2019
1 17 11 -10.3281 2.5546
1 17 12 -2.5331 2.4738
1 17 13 -0.2506 0.9983
1 17 14 -0.3357 -1.3563
1 17 15 7.6608 -4.5962
1 17 16 5.6858 -1.7597
1 17 17 0.6119 -0.8597
1 17 18 5.7573 3.3366
1 17 19 -4.2606 3.1779
1 17 20 -4.5925 -4.0217
1 17 21 -0.1562 0.2624
1 17 22 -4.5093 0.2983
1 17 23 3.5072 0.2652
1 17 24 2.7953 1.1020
1 17 25 -1.9313 -0.6047
1 17 26 -0.1528 0.8623
1 17 27 -1.9160 -2.9188
1 17 28 -1.7020 1.1811
1 17 29 0.3122 1.1479
1 17 30 1.7239 -1.4875
1 18 0 0.1545 -6.5682
1 18 1 0.6299 -1.6746
1 18 2 -4.9114 -2.1516
1 18 3 -4.4920 -4.2486
1 18 4 -5.1512 4.5251
1 18 5 3.4228 -0.5946
1 18 6 1.2471 3.5173
1 18 7 2.2826 1.8033
1 18 8 2.7266 -0.0293
1 18 9 -0.1851 3.3917
1 18 10 -0.1896 -1.0052
1 18 11 0.2811 2.7618
1 18 12 3.7105 -1.4752
1 18 13 -1.9626 -1.9483
1 18 14 -1.8769 -0.8388
1 18 15 -2.4754 -5.0353
1 18 16 -2.9545 -3.9477
1 18 17 4.4506 -1.6331
1 18 18 -1.1576 0.3494
1 18 19 -1.1441 4.2304
1 18 20 2.6852 7.3419
1 18 21 -3.1925 0.2151
1 18 22 2.2555 -0.7376
1 18 23 2.3243 -0.3562
1 18 24 -1.2184 -3.5972
1 18 25 -2.0815 0.1362
1 18 26 -0.0215 1.1334
1 18 27 0.9097 0.8643
1 18 28 -0.6417 0.9614
1 18 29 2.2021 -1.0725
1 19 0 -0.0845 2.8855
1 19 1 -1.9180 3.7190
1 19 2 8.4086 4.3416
1 19 3 -3.0094 -0.4153
1 19 4 -0.7816 -1.9929
1 19 5 4.1999 0.3665
1 19 6 -6.1666 -5.8130
1 19 7 6.9154 1.0922
1 19 8 3.0201 -0.7425
1 19 9 -0.3644 -2.4267
1 19 10 4.1633 0.1267
1 19 11 -6.5297 0.2285
1 19 12 -5.1154 2.3423
1 19 13 -3.9358 3.7742
1 19 14 -4.1473 2.3218
1 19 15 0.7473 -2.2340
1 19 16 4.0438 -0.0504
1 19 17 3.3789 -1.9019
1 19 18 6.4577 -2.3269
1 19 19 0.7590 5.7216
1 19 20 -4.3243 -1.4913
1 19 21 0.9357 -3.5921
1 19 22 -2.9546 0.3946
1 19 23 0.6897 -1.8008
1 19 24 3.6990 2.3612
1 19 25 -1.9961 0.7149
1 19 26 -0.9394 0.8369
1 19 27 -0.7447 -0.5411
1 19 28 -2.0817 -0.8551
1 20 0 0.2035 -1.5214
1 20 1 4.2865 -0.3403
1 20 2 -2.2740 1.4043
1 20 3 -1.3996 -4.0731
1 20 4 -6.4307 0.5122
1 20 5 -2.0103 -4.7472
1 20 6 3.0896 -2.2093
1 20 7 -1.6433 3.2382
1 20 8 2.0067 -0.9367
1 20 9 -0.1941 6.3833
1 20 10 0.3187 0.2485
1 20 11 0.5333 2.2464
1 20 12 2.2719 2.5537
1 20 13 1.8305 -1.8603
1 20 14 1.0282 3.6213
1 20 15 -0.6330 -4.5905
1 20 16 -5.4501 -5.4499
1 20 17 2.4648 -1.7798
1 20 18 0.7092 -2.5125
1 20 19 -4.5882 0.0478
1 20 20 2.3970 5.0056
1 20 21 -2.8729 0.6550
1 20 22 -0.6957 -1.0017
1 20 23 4.0067 2.9749
1 20 24 1.0864 -0.9612
1 20 25 0.1235 -0.1658
1 20 26 -1.5350 -0.1511
1 20 27 -0.8463 -1.0382
1 21 0 -0.0449 0.8302
1 21 1 -3.1895 1.7131
1 21 2 2.6224 2.5132
1 21 3 0.1191 4.6519
1 21 4 -5.6614 -3.5250
1 21 5 3.8459 3.3870
1 21 6 -3.9920 -1.6873
1 21 7 2.3013 -1.2899
1 21 8 6.9008 1.5290
1 21 9 -0.8554 -4.0409
1 21 10 5.9942 -0.4651
1 21 11 0.4089 -2.2636
1 21 12 -1.6945 -1.4646
1 21 13 -4.3554 2.9915
1 21 14 -5.9125 3.9387
1 21 15 -3.9773 -0.8025
1 21 16 -1.2782 1.1596
1 21 17 3.4193 2.1145
1 21 18 3.9555 -4.0254
1 21 19 3.3353 3.8910
1 21 20 -2.4229 2.6238
1 21 21 0.2156 -4.7082
1 21 22 -0.2575 -1.2576
1 21 23 -0.2461 -2.7361
1 21 24 1.9729 1.6516
1 21 25 -0.6982 1.9497
1 21 26 -0.1219 -0.2056
1 22 0 0.0656 2.0306
1 22 1 4.6131 2.1356
1 22 2 -0.0195 3.0528
1 22 3 1.2315 1.0550
1 22 4 0.5369 -0.2795
1 22 5 -5.7439 -4.4474
1 22 6 1.2554 -6.7473
1 22 7 -2.6247 0.2003
1 22 8 0.6786 -3.5038
1 22 9 -0.7404 3.9278
1 22 10 -1.1442 2.2965
1 22 11 2.2910 -0.0401
1 22 12 -0.2100 5.8242
1 22 13 1.6648 -0.6754
1 22 14 2.7203 4.4603
1 22 15 2.0295 -0.2220
1 22 16 -3.5494 -4.3103
1 22 17 0.8816 -1.6913
1 22 18 3.4324 -1.6900
1 22 19 -4.4408 -1.4307
1 22 20 -1.0162 0.2376
1 22 21 -2.1084 0.8980
1 22 22 -1.9140 -1.1163
1 22 23 2.3456 2.2976
1 22 24 1.4437 -0.0171
1 22 25 1.4254 1.3973
1 23 0 -0.0526 -0.3281
1 23 1 0.4943 0.9659
1 23 2 -2.0591 -3.0098
1 23 3 0.9949 4.7073
1 23 4 -4.7056 -0.8401
1 23 5 -0.8953 1.4720
1 23 6 -1.4407 2.8767
1 23 7 -3.4201 -1.0050
1 23 8 4.5294 2.9596
1 23 9 0.3878 -3.4074
1 23 10 4.4086 0.2577
1 23 11 4.5558 -2.0618
1 23 12 2.5542 -5.1129
1 23 13 -0.8748 0.7697
1 23 14 -4.0245 2.8287
1 23 15 -3.3393 0.1693
1 23 16 -4.4026 -0.5688
1 23 17 1.4207 3.1391
1 23 18 -0.3651 -0.5333
1 23 19 1.7669 1.6344
1 23 20 0.9493 3.6505
1 23 21 -0.3926 -2.0374
1 23 22 0.8067 -1.9668
1 23 23 0.6216 -3.0752
1 23 24 -0.4342 0.9110
1 24 0 -0.0209 -0.7237
1 24 1 1.3058 3.5960
1 24 2 2.3882 1.9180
1 24 3 0.0661 4.2239
1 24 4 5.7777 2.3911
1 24 5 -1.4774 -0.0661
1 24 6 -0.6474 -4.4817
1 24 7 -2.5609 -2.1600
1 24 8 -0.2600 -4.5172
1 24 9 0.0186 -2.2636
1 24 10 -4.4633 2.1366
1 24 11 2.7329 -1.4214
1 24 12 -0.0763 4.3370
1 24 13 -0.2845 0.9501
1 24 14 2.2311 1.1454
1 24 15 1.5355 1.8342
1 24 16 -0.1797 0.2023
1 24 17 0.2339 0.1843
1 24 18 3.4191 -0.5640
1 24 19 -0.4785 0.2622
1 24 20 -2.0403 -3.3759
1 24 21 -2.3325 -0.9575
1 24 22 -1.1173 0.3848
1 24 23 0.6510 1.2878
1 25 0 0.0072 -1.6291
1 25 1 2.5428 1.0102
1 25 2 -2.1334 -3.9455
1 25 3 0.5375 -1.0785
1 25 4 0.4569 1.1455
1 25 5 -2.1457 -0.9452
1 25 6 1.0621 2.6990
1 25 7 -5.0017 -0.2183
1 25 8 -2.5964 4.2178
1 25 9 0.1804 -0.9104
1 25 10 0.8900 0.1432
1 25 11 3.6396 1.0418
1 25 12 3.6397 -5.4696
1 25 13 1.5852 -1.0696
1 25 14 -0.6704 -0.0902
1 25 15 0.7660 0.1168
1 25 16 -2.2258 -0.2160
1 25 17 0.1247 0.0367
1 25 18 -2.5306 2.3848
1 25 19 -2.6722 1.6689
1 25 20 1.2920 0.9142
1 25 21 0.1853 -0.0477
1 26 0 0.0214 -2.8157
1 26 1 -2.6158 1.0287
1 26 2 1.7506 -0.1564
1 26 3 -1.2525 1.5714
1 26 4 3.1725 2.0040
1 26 5 3.0257 2.9271
1 26 6 1.0016 1.6396
1 26 7 -0.6761 -0.7237
1 26 8 -1.8366 -1.6226
1 26 9 1.9499 -4.4169
1 26 10 -4.2142 -0.7392
1 26 11 0.0885 -0.1871
1 26 12 1.3409 0.8404
1 26 13 -1.3261 0.8751
1 26 14 1.1263 -1.8127
1 26 15 -0.5651 -0.7714
1 26 16 1.7646 2.0897
1 26 17 1.4290 2.7672
1 26 18 -0.0051 0.9806
1 26 19 1.2910 2.4068
1 26 20 -0.4306 -2.4065
1 27 0 -0.0235 -1.1666
1 27 1 2.0456 0.7141
1 27 2 -2.1779 0.0617
1 27 3 -1.9127 -3.4412
1 27 4 3.0911 -0.0701
1 27 5 0.0882 -2.3025
1 27 6 3.1669 0.3328
1 27 7 0.5230 -0.9944
1 27 8 -5.3384 2.3951
1 27 9 -1.3326 1.9665
1 27 10 -1.3904 -0.7946
1 27 11 -1.0522 2.1988
1 27 12 1.3590 -1.9396
1 27 13 1.0236 -0.3612
1 27 14 0.8971 -2.2697
1 27 15 3.0882 -2.5361
1 27 16 2.0425 1.9498
1 27 17 0.3645 -1.8200
1 27 18 -1.5961 2.3110
1 28 0 0.0978 -0.5387
1 28 1 -2.3671 -0.4223
1 28 2 -0.2961 -0.7831
1 28 3 -1.5195 -1.2380
1 28 4 -1.7014 -0.8233
1 28 5 2.0005 0.6748
1 28 6 1.8422 3.1263
1 28 7 2.3769 1.3826
1 28 8 -2.2772 0.7084
1 28 9 0.1512 -1.0791
1 28 10 -0.8782 -1.7548
1 28 11 -1.1950 1.6693
1 28 12 1.0276 -0.2178
1 28 13 -0.2671 -0.8767
1 28 14 1.0381 -1.6800
1 28 15 -2.0301 -3.0311
1 28 16 1.3171 0.6724
1 29 0 -0.0644 -0.9496
1 29 1 1.8765 0.0617
1 29 2 -0.4701 2.9254
1 29 3 -4.0294 -0.4641
1 29 4 0.0736 -0.0871
1 29 5 0.7872 -2.1982
1 29 6 1.4525 -1.3160
1 29 7 4.5174 -0.7398
1 29 8 -0.1510 -0.2721
1 29 9 -0.5656 1.9003
1 29 10 -0.5039 -0.1456
1 29 11 -3.8707 0.1357
1 29 12 -1.8417 -0.8757
1 29 13 -1.3983 1.8514
1 30 0 -0.0010 0.4850
1 30 1 -0.2355 -0.0540
1 30 2 -0.4623 0.2495
1 30 3 -0.4790 -1.3044
1 30 4 -3.0874 -1.2561
1 30 5 -0.5239 -0.5135
1 30 6 0.6242 -0.1225
1 30 7 3.0909 0.8323
1 30 8 0.0631 0.5839
1 30 9 -2.5299 0.3532
1 30 10 -1.4102 -0.7072
1 31 0 -0.0029 -0.7445
1 31 1 1.0748 -0.9840
1 31 2 2.3947 1.9483
1 31 3 -1.8124 1.5175
1 31 4 -2.8476 1.0260
2 0 0 62.3371 1.2687
2 0 1 -0.9306 -11.5279
2 0 2 5.8083 -0.0856
2 0 3 1.3572 -23.2524
2 0 4 -59.5469 -1.7112
2 0 5 0.5306 40.1597
2 0 6 7.7952 0.5128
2 0 7 -1.3850 24.2780
2 0 8 37.7310 1.8708
2 0 9 -0.2197 -16.0670
2 0 10 -19.4085 -0.9597
2 0 11 1.3424 -23.0916
2 0 12 -20.4212 -1.5101
2 0 13 -0.1920 1.3425
2 0 14 18.6342 1.1879
2 0 15 -0.9940 1.0121
2 0 16 11.8729 1.0657
2 0 17 0.3088 2.6442
2 0 18 -21.7349 -1.2553
2 0 19 0.7803 9.6163
2 0 20 1.8489 -0.6569
2 0 21 -0.3737 0.6389
2 0 22 10.7878 1.2340
2 0 23 -0.6180 -5.0371
2 0 24 -0.7612 0.2772
2 0 25 0.4270 -6.0598
2 0 26 -6.1891 -1.0422
2 0 27 0.3980 3.8740
2 0 28 -1.7757 0.0062
2 0 29 -0.3782 -0.1472
2 0 30 5.8877 0.7876
2 0 31 -0.2758 1.5639
2 0 32 -2.1435 -0.1386
2 0 33 0.3922 1.7491
2 0 34 -4.7151 -0.5826
2 0 35 0.1021 -1.3266
2 1 0 -0.2366 0.1305
2 1 1 -27.2075 -6.2882
2 1 2 -13.0623 35.1687
2 1 3 21.8191 -4.8361
2 1 4 3.8667 10.1255
2 1 5 43.2251 11.4714
2 1 6 21.9090 -30.7809
2 1 7 -31.0092 1.6437
2 1 8 2.8346 3.1051
2 1 9 -38.6163 -2.4934
2 1 10 -17.2653 16.2191
2 1 11 13.4893 -0.5990
2 1 12 -6.4887 -4.3500
2 1 13 22.8537 0.7647
2 1 14 8.4872 -11.9165
2 1 15 -7.3702 -0.8197
2 1 16 -2.1124 9.2310
2 1 17 -1.3435 0.3762
2 1 18 0.1778 3.3378
2 1 19 4.6402 -0.1346
2 1 20 3.1811 -7.6203
2 1 21 -0.0109 0.6532
2 1 22 2.8160 0.8274
2 1 23 -10.3724 0.3627
2 1 24 -3.2697 0.8841
2 1 25 0.7826 -1.9308
2 1 26 -3.8024 5.0699
2 1 27 8.4485 2.1117
2 1 28 1.9435 -2.6507
2 1 29 -0.5027 0.3858
2 1 30 1.1009 -4.6568
2 1 31 -2.2966 -2.2061
2 1 32 0.1107 4.0952
2 1 33 -0.1870 0.8401
2 1 34 0.4874 0.6084
2 1 35 0.4221 1.3283
2 2 0 43.5736 0.8525
2 2 1 18.0796 1.6326
2 2 2 -0.3899 -25.9003
2 2 3 28.9303 -23.7365
2 2 4 -40.9231 -23.7162
2 2 5 -16.5012 18.0750
2 2 6 7.5257 17.5635
2 2 7 -12.5038 22.7835
2 2 8 29.1469 16.4396
2 2 9 17.9111 -9.1546
2 2 10 -11.8101 6.1240
2 2 11 -2.9562 -13.8656
2 2 12 -17.9478 -6.0469
2 2 13 -13.6683 -0.3129
2 2 14 11.8072 -2.3079
2 2 15 6.0966 1.5426
2 2 16 10.1199 -8.5038
2 2 17 9.9037 3.3959
2 2 18 -14.1562 -5.4287
2 2 19 -7.8858 2.3211
2 2 20 -0.5507 8.5427
2 2 21 -2.8892 0.1483
2 2 22 8.1654 4.4300
2 2 23 4.0828 -2.0814
2 2 24 -0.1519 0.2695
2 2 25 1.9690 -3.6713
2 2 26 -4.0958 -3.5432
2 2 27 -3.3560 2.4187
2 2 28 -1.7299 -0.0082
2 2 29 -1.9691 0.9729
2 2 30 3.2398 -1.5426
2 2 31 3.7638 0.5781
2 2 32 -0.2463 -0.9763
2 2 33 0.0454 -0.3246
2 2 34 -3.6497 2.9142
2 2 35 -2.9841 -0.3731
2 3 0 -8.2370 0.3939
2 3 1 -17.2315 -11.8115
2 3 2 -23.6951 28.5144
2 3 3 -3.7877 -4.6200
2 3 4 8.6809 -7.2345
2 3 5 22.5087 19.7736
2 3 6 40.2129 -25.4070
2 3 7 -5.4566 0.0703
2 3 8 6.8966 7.5412
2 3 9 -11.1509 -5.6925
2 3 10 -28.0198 19.7771
2 3 11 5.8242 2.5331
2 3 12 -12.6250 -6.9809
2 3 13 1.0463 0.5744
2 3 14 9.2942 -11.7066
2 3 15 -0.8096 -3.1382
2 3 16 -0.9558 8.1822
2 3 17 -2.4753 1.4783
2 3 18 2.4752 4.5919
2 3 19 0.7353 0.3593
2 3 20 4.4609 -8.0472
2 3 21 1.7913 0.9711
2 3 22 4.5527 0.3397
2 3 23 -2.6047 0.4202
2 3 24 -5.7175 3.6707
2 3 25 1.2793 -2.4573
2 3 26 -7.1200 0.6995
2 3 27 2.7264 2.8184
2 3 28 3.6813 -0.5064
2 3 29 -0.9462 1.0412
2 3 30 2.5156 -2.3613
2 3 31 -3.1948 -4.0317
2 3 32 -0.3114 1.1955
2 3 33 1.1399 0.8184
2 3 34 1.0902 1.0896
2 3 35 1.6506 3.8477
2 4 0 6.6001 0.0820
2 4 1 19.6055 29.0394
2 4 2 -5.1197 -27.5239
2 4 3 24.9840 -29.3277
2 4 4 -7.7415 -22.3008
2 4 5 -17.0570 -18.8339
2 4 6 1.9675 10.8580
2 4 7 -14.2763 20.9956
2 4 8 13.5495 15.8442
2 4 9 19.3621 -2.9996
2 4 10 2.9423 6.4978
2 4 11 1.3196 -2.5532
2 4 12 -12.1861 1.6590
2 4 13 -16.4083 6.9763
2 4 14 -1.9944 -4.1846
2 4 15 4.8776 4.5168
2 4 16 7.5641 -13.1174
2 4 17 10.4867 -3.2767
2 4 18 -0.4721 -1.6342
2 4 19 -5.2040 -9.3577
2 4 20 -4.4977 8.4761
2 4 21 -4.6195 2.3483
2 4 22 3.0028 3.6866
2 4 23 4.0456 3.2633
2 4 24 1.6351 -0.3647
2 4 25 1.9633 -1.0025
2 4 26 -0.1730 -3.0936
2 4 27 -3.6746 -0.0532
2 4 28 -3.0721 -0.7799
2 4 29 -1.4095 3.6230
2 4 30 -0.4392 -0.3217
2 4 31 2.8717 -1.3866
2 4 32 3.0308 -0.6666
2 4 33 1.6783 -5.1547
2 4 34 -2.1876 1.9082
2 4 35 -2.6945 2.7097
2 5 0 -14.0318 -0.0861
2 5 1 -17.6628 -9.1048
2 5 2 -11.2858 17.2421
2 5 3 -29.4437 4.4372
2 5 4 3.7901 -12.7847
2 5 5 5.0140 11.6979
2 5 6 22.6997 -19.5379
2 5 7 14.1324 -5.8356
2 5 8 4.7973 8.8471
2 5 9 9.4001 -8.8879
2 5 10 -11.5211 18.6237
2 5 11 5.7176 9.8496
2 5 12 -2.3932 -7.4461
2 5 13 -10.9279 0.9862
2 5 14 -2.9119 -10.0290
2 5 15 -4.6312 -6.7529
2 5 16 0.3688 5.8483
2 5 17 -3.1380 0.9070
2 5 18 2.4318 5.3174
2 5 19 0.6252 3.0950
2 5 20 2.8109 -8.3952
2 5 21 3.9795 0.1241
2 5 22 1.6751 0.4907
2 5 23 3.1599 -1.0045
2 5 24 -3.5626 5.3973
2 5 25 0.4146 0.8851
2 5 26 -3.8324 -1.5345
2 5 27 -2.2232 0.0104
2 5 28 2.7028 0.0824
2 5 29 -0.8201 1.4679
2 5 30 2.9698 -0.2652
2 5 31 -3.1833 -3.2997
2 5 32 -3.0503 -0.4957
2 5 33 1.6042 -0.0486
2 5 34 0.2799 -0.7734
2 5 35 3.5408 5.3239
2 6 0 -12.8055 0.0173
2 6 1 2.0636 44.2354
2 6 2 -0.7002 2.6341
2 6 3 3.3664 -30.6879
2 6 4 5.7322 -6.9055
2 6 5 -0.9527 -32.3237
2 6 6 -3.0036 -10.8477
2 6 7 -10.4570 13.5558
2 6 8 4.6058 9.4413
2 6 9 6.0854 -1.5013
2 6 10 5.3261 0.2971
2 6 11 8.5987 -3.0256
2 6 12 -4.4074 2.6291
2 6 13 -8.3982 16.7506
2 6 14 -6.8972 0.6998
2 6 15 -2.7406 7.9073
2 6 16 4.2359 -2.7724
2 6 17 4.8957 -11.0073
2 6 18 3.6932 1.0057
2 6 19 3.3054 -12.8434
2 6 20 -3.1936 -1.4846
2 6 21 -4.0919 3.4140
2 6 22 0.8528 1.2663
2 6 23 0.8028 7.3543
2 6 24 1.9455 0.7232
2 6 25 0.6669 -0.2386
2 6 26 1.5950 -0.6015
2 6 27 -0.3888 -1.7222
2 6 28 -4.0782 -2.3585
2 6 29 -1.1276 3.3968
2 6 30 -1.3571 2.6048
2 6 31 -0.3126 -1.2514
2 6 32 3.1141 1.5980
2 6 33 4.0511 -5.9758
2 6 34 0.1529 -3.7624
2 6 35 -2.1999 3.2310
2 7 0 2.2473 -0.0234
2 7 1 -23.1601 -2.9138
2 7 2 5.5468 7.2321
2 7 3 -31.1844 6.5876
2 7 4 -8.0013 -2.5783
2 7 5 0.0138 4.4112
2 7 6 -5.2173 -14.2370
2 7 7 14.9052 -9.5050
2 7 8 -1.6653 6.8299
2 7 9 7.8998 -7.7218
2 7 10 5.8275 10.3841
2 7 11 5.9587 13.7158
2 7 12 11.0927 -5.1809
2 7 13 -2.8498 0.8984
2 7 14 -5.6526 -5.5218
2 7 15 -9.1258 -9.8632
2 7 16 -3.3486 2.4945
2 7 17 -3.5964 0.2028
2 7 18 -1.9153 3.5885
2 7 19 0.3355 6.5643
2 7 20 1.0516 -6.5238
2 7 21 6.5400 -2.9218
2 7 22 -0.0546 0.1789
2 7 23 2.9309 -1.9127
2 7 24 0.7452 4.0577
2 7 25 -1.7590 3.6984
2 7 26 0.7318 0.4924
2 7 27 -2.4165 -1.5021
2 7 28 -0.1218 -0.8333
2 7 29 -0.7179 0.9108
2 7 30 1.8982 0.4129
2 7 31 -0.7134 -1.9119
2 7 32 -3.5774 -1.3358
2 7 33 0.4904 0.6048
2 7 34 -1.9680 -2.6487
2 8 0 -2.3658 0.0602
2 8 1 -14.3972 27.8209
2 8 2 3.1937 34.5133
2 8 3 -7.8389 -16.5841
2 8 4 -4.6149 6.6060
2 8 5 11.6915 -16.5303
2 8 6 -0.0737 -20.1172
2 8 7 -4.3060 2.3194
2 8 8 6.6182 -0.6897
2 8 9 -3.4234 0.2689
2 8 10 -4.1902 -2.9853
2 8 11 6.1793 -6.6362
2 8 12 -1.0855 -4.0076
2 8 13 -0.6630 12.4786
2 8 14 -0.6212 4.9374
2 8 15 -6.2857 5.8220
2 8 16 0.8945 10.7985
2 8 17 1.5348 -6.9768
2 8 18 -1.1431 0.9158
2 8 19 5.1651 -6.6253
2 8 20 0.1819 -10.0712
2 8 21 -2.0467 0.2918
2 8 22 2.7079 -2.7236
2 8 23 -0.8294 5.8918
2 8 24 1.2220 3.5226
2 8 25 -0.3088 -0.2443
2 8 26 0.0378 1.6373
2 8 27 2.7477 -0.9218
2 8 28 -2.5132 -1.8099
2 8 29 -1.4882 0.9857
2 8 30 -0.6725 2.2702
2 8 31 -2.1477 -0.6183
2 8 32 0.7514 2.6916
2 8 33 3.2496 -1.7308
2 8 34 2.8450 -5.3868
2 9 0 23.5225 0.0577
2 9 1 -15.8233 1.3229
2 9 2 10.2430 3.5295
2 9 3 -10.4897 0.5892
2 9 4 -12.6935 4.7825
2 9 5 5.4943 2.6298
2 9 6 -19.6147 -8.5698
2 9 7 3.3989 -8.2031
2 9 8 -5.8659 1.6677
2 9 9 -7.4850 -0.7777
2 9 10 12.3614 4.1461
2 9 11 3.5922 10.5345
2 9 12 11.1997 -0.6514
2 9 13 9.3281 -0.0384
2 9 14 0.0588 -0.6157
2 9 15 -5.6846 -8.7789
2 9 16 -4.7285 -1.8355
2 9 17 -3.9237 -0.2770
2 9 18 -4.9811 0.7053
2 9 19 -0.5042 6.7338
2 9 20 -2.7029 -1.4889
2 9 21 5.1498 -4.1738
2 9 22 2.1587 -1.8786
2 9 23 -0.5259 -2.0822
2 9 24 3.5159 1.4956
2 9 25 -2.1400 2.6799
2 9 26 2.2419 2.5465
2 9 27 1.1692 -0.4661
2 9 28 -1.2842 -0.9181
2 9 29 -0.6352 0.1226
2 9 30 -1.1229 -0.0242
2 9 31 -0.6779 0.0415
2 9 32 -0.8521 -1.3149
2 9 33 1.2166 0.5832
2 9 34 -2.2192 -1.7929
2 10 0 15.6769 0.1014
2 10 1 -12.3733 -3.6365
2 10 2 0.5371 33.8142
2 10 3 -4.8223 1.2351
2 10 4 -16.2175 8.7188
2 10 5 7.7801 5.8450
2 10 6 3.4705 -9.7834
2 10 7 1.5350 2.0681
2 10 8 12.9856 -7.9962
2 10 9 -0.9756 -2.3756
2 10 10 -7.8555 -1.6276
2 10 11 -1.0398 -7.4258
2 10 12 -4.6796 -6.3915
2 10 13 -0.4159 2.6581
2 10 14 5.7795 4.0268
2 10 15 -3.3941 0.6171
2 10 16 -0.8688 12.4035
2 10 17 1.5019 0.7142
2 10 18 -4.7513 0.6701
2 10 19 0.8721 2.9158
2 10 20 0.2575 -9.0916
2 10 21 -1.1188 -1.6694
2 10 22 4.8452 -4.6298
2 10 23 0.2174 -1.4118
2 10 24 0.3774 3.5803
2 10 25 -0.0598 0.0162
2 10 26 -2.2177 1.4954
2 10 27 2.1419 -0.0768
2 10 28 0.1101 0.8349
2 10 29 -0.3283 1.1434
2 10 30 0.7325 0.6423
2 10 31 -1.6773 -0.6135
2 10 32 -0.8324 1.3873
2 10 33 -0.1299 -0.0221
2 11 0 22.2413 -0.0321
2 11 1 0.0696 2.3472
2 11 2 3.1939 3.9110
2 11 3 7.6355 -3.0158
2 11 4 -7.4791 3.9162
2 11 5 13.3236 -0.0433
2 11 6 -10.3770 -5.3550
2 11 7 -6.1650 -2.3697
2 11 8 -3.5032 -4.7915
2 11 9 -20.2281 2.3169
2 11 10 3.7888 5.3833
2 11 11 2.8160 3.7051
2 11 12 2.7462 1.8653
2 11 13 13.0415 0.8685
2 11 14 7.0890 1.2582
2 11 15 -0.4405 -2.6332
2 11 16 -2.0831 -2.3492
2 11 17 -3.0803 -1.2794
2 11 18 -6.3229 -0.4627
2 11 19 1.1518 1.9111
2 11 20 -3.3765 1.1673
2 11 21 -1.3804 -1.1070
2 11 22 4.2965 -2.9800
2 11 23 -2.4965 -1.5407
2 11 24 1.8339 0.4616
2 11 25 -0.8677 0.3014
2 11 26 0.7435 1.8665
2 11 27 3.9886 -0.4362
2 11 28 0.3422 -0.5108
2 11 29 1.1390 -0.1897
2 11 30 -1.4947 -1.3492
2 11 31 -3.5555 1.6830
2 11 32 -1.4755 1.0183
2 11 33 2.0109 0.1318
2 12 0 17.3227 -0.0203
2 12 1 0.6728 -17.7702
2 12 2 -1.6619 8.9479
2 12 3 -0.3798 7.2685
2 12 4 -15.1730 1.0694
2 12 5 -2.3140 11.8783
2 12 6 0.6046 1.4185
2 12 7 1.6603 8.7000
2 12 8 14.7830 -1.5612
2 12 9 4.8588 -4.3497
2 12 10 -3.3000 -0.3294
2 12 11 -0.9585 -5.5457
2 12 12 -7.2909 -6.1168
2 12 13 -4.9333 -4.2186
2 12 14 6.9671 1.6642
2 12 15 1.1381 -1.8441
2 12 16 -0.0481 6.3654
2 12 17 1.7849 4.2470
2 12 18 -4.8807 -1.0469
2 12 19 -2.4586 7.2900
2 12 20 -2.5388 -2.2908
2 12 21 -1.7966 -0.9853
2 12 22 4.6164 -0.6810
2 12 23 2.4131 -5.5909
2 12 24 0.6945 -0.3256
2 12 25 -0.0352 -0.3828
2 12 26 -2.8428 0.3200
2 12 27 -1.1100 -0.9777
2 12 28 -0.3939 1.1465
2 12 29 1.5445 2.7876
2 12 30 2.7327 0.6299
2 12 31 0.3764 -0.0403
2 12 32 -0.0110 1.3595
2 12 33 -1.3552 -0.0843
2 13 0 4.9929 0.1280
2 13 1 7.4028 2.4384
2 13 2 -3.0152 4.8267
2 13 3 8.6491 -1.7923
2 13 4 -2.8995 2.6382
2 13 5 11.5209 -2.7637
2 13 6 6.6548 -7.0884
2 13 7 -4.4002 2.7796
2 13 8 3.5708 -4.9334
2 13 9 -15.5016 -2.0871
2 13 10 -9.1679 7.4556
2 13 11 -1.5121 0.5474
2 13 12 -4.5139 -1.2890
2 13 13 6.0937 1.4297
2 13 14 9.4746 -0.2205
2 13 15 4.7532 1.5382
2 13 16 1.9130 2.9639
2 13 17 0.6623 -0.8268
2 13 18 -6.0520 1.9404
2 13 19 0.4366 -1.7494
2 13 20 0.5586 -2.1846
2 13 21 -5.2051 1.7504
2 13 22 3.1164 -2.7469
2 13 23 -1.1019 -0.6970
2 13 24 -1.6429 1.6219
2 13 25 -0.3809 -0.0241
2 13 26 -1.8546 1.6494
2 13 27 3.5604 -1.5978
2 13 28 1.7174 -1.9178
2 13 29 1.8802 -0.0873
2 13 30 1.8676 -2.7328
2 13 31 -2.4336 0.8714
2 13 32 -3.9008 3.4708
2 14 0 6.4730 -0.2684
2 14 1 6.9524 -9.9424
2 14 2 1.2458 -7.5947
2 14 3 0.4438 2.4733
2 14 4 -7.9974 -4.9166
2 14 5 -6.0756 4.9627
2 14 6 -3.2720 1.8878
2 14 7 -2.3898 7.3932
2 14 8 9.0575 7.0386
2 14 9 6.9540 -0.0050
2 14 10 0.0358 0.9083
2 14 11 1.9833 -1.4417
2 14 12 -3.2913 -1.8892
2 14 13 -7.6161 -6.9647
2 14 14 3.6437 -1.9209
2 14 15 3.9888 -2.4213
2 14 16 2.4678 -1.7555
2 14 17 2.8506 4.1613
2 14 18 -3.5526 -0.9486
2 14 19 -1.9225 4.4557
2 14 20 -4.8874 3.1622
2 14 21 -3.5211 -0.4780
2 14 22 2.0708 2.9512
2 14 23 2.6668 -1.5524
2 14 24 3.1273 -2.0345
2 14 25 0.6320 -2.1183
2 14 26 -2.1806 -0.8562
2 14 27 -2.7812 -0.7740
2 14 28 -3.3421 -1.0324
2 14 29 0.3188 2.6284
2 14 30 3.6918 1.2717
2 14 31 2.0668 -0.1699
2 15 0 -4.4913 0.1163
2 15 1 3.4200 1.5649
2 15 2 -3.6222 6.1992
2 15 3 3.2406 0.0599
2 15 4 -2.2188 3.3624
2 15 5 2.1711 -0.4749
2 15 6 11.6470 -9.1983
2 15 7 0.4202 1.2346
2 15 8 6.9412 0.2451
2 15 9 -0.5512 -4.7693
2 15 10 -9.0138 5.1374
2 15 11 -4.8248 2.1736
2 15 12 -6.7839 -3.9298
2 15 13 -3.6464 -0.9201
2 15 14 1.7681 -2.9180
2 15 15 4.6329 -0.7615
2 15 16 4.1466 6.8268
2 15 17 5.2680 0.8427
2 15 18 -0.8710 4.3987
2 15 19 -2.2037 1.1705
2 15 20 2.1803 -5.7726
2 15 21 -2.8741 1.6817
2 15 22 1.2300 -2.1689
2 15 23 1.4505 -1.4468
2 15 24 -2.9769 2.5131
2 15 25 -0.2675 0.7775
2 15 26 -3.3457 2.4673
2 15 27 0.7036 -0.1493
2 15 28 2.6876 -3.3745
2 15 29 -0.0053 -0.7564
2 15 30 2.7889 -1.8415
2 15 31 1.6217 -1.5401
2 16 0 0.2005 -0.0915
2 16 1 3.1969 0.6158
2 16 2 4.0206 -6.1111
2 16 3 1.8568 -2.2360
2 16 4 -3.1278 -6.7260
2 16 5 -3.8811 -0.7736
2 16 6 -3.6139 -0.5592
2 16 7 -4.4837 0.9063
2 16 8 1.7320 7.1497
2 16 9 4.6404 3.0619
2 16 10 1.3420 1.6748
2 16 11 1.0670 0.1671
2 16 12 0.1872 3.8320
2 16 13 -4.5492 -1.1365
2 16 14 -0.7830 -2.9844
2 16 15 3.0132 -1.2097
2 16 16 3.6038 -7.6641
2 16 17 4.2692 -0.9515
2 16 18 -1.8180 0.8221
2 16 19 0.6888 -0.4923
2 16 20 -3.2029 3.3584
2 16 21 -4.2061 0.0428
2 16 22 -0.5686 1.4992
2 16 23 -0.4189 3.0420
2 16 24 3.6336 1.0688
2 16 25 2.2334 -1.8852
2 16 26 -0.2967 -2.7136
2 16 27 -1.6865 0.4404
2 16 28 -3.0968 -1.7508
2 16 29 -2.4351 0.4802
2 16 30 1.1743 2.0471
2 17 0 -3.2405 -0.0084
2 17 1 -1.0510 -1.6154
2 17 2 -3.4071 6.8693
2 17 3 -0.5307 0.9486
2 17 4 0.0027 1.9480
2 17 5 -4.0816 5.2163
2 17 6 7.1051 -5.9576
2 17 7 2.3384 -3.6666
2 17 8 2.7587 2.4368
2 17 9 7.0629 -3.4493
2 17 10 -1.2308 2.5291
2 17 11 -1.2336 3.9193
2 17 12 -2.5657 -2.3184
2 17 13 -5.7181 -1.8168
2 17 14 -6.1427 -4.2690
2 17 15 -1.6040 -5.3260
2 17 16 0.9679 4.9617
2 17 17 4.0793 2.5545
2 17 18 4.4448 2.4785
2 17 19 -2.3541 5.2582
2 17 20 0.2314 -4.3451
2 17 21 0.8037 -0.3487
2 17 22 0.5919 -0.7252
2 17 23 3.3413 -1.7088
2 17 24 -1.9050 1.5045
2 17 25 -0.0592 1.0647
2 17 26 -1.3742 1.4967
2 17 27 -2.8560 1.0542
2 17 28 2.2791 -1.3394
2 17 29 -0.0469 -1.9771
2 18 0 2.6071 0.0736
2 18 1 -1.0637 4.7743
2 18 2 1.4240 -0.4314
2 18 3 4.3129 -1.5440
2 18 4 -0.9831 -5.4137
2 18 5 -0.5531 -4.9516
2 18 6 -0.8411 -0.4884
2 18 7 -4.4791 -2.7066
2 18 8 -1.1399 3.3003
2 18 9 1.1275 2.4562
2 18 10 1.1007 1.0888
2 18 11 1.3457 -0.1310
2 18 12 -1.5489 2.4159
2 18 13 -1.1664 5.5969
2 18 14 -1.2535 0.4377
2 18 15 0.2841 2.1467
2 18 16 2.0234 -4.9962
2 18 17 4.0315 -4.6957
2 18 18 -0.2664 1.2565
2 18 19 0.7009 -3.5118
2 18 20 0.0930 -0.2598
2 18 21 -1.6457 -0.0649
2 18 22 -0.4422 -1.2274
2 18 23 -2.9120 2.5259
2 18 24 1.1504 2.4417
2 18 25 0.9781 0.8898
2 18 26 1.0964 -2.2959
2 18 27 0.1516 0.0895
2 18 28 -0.1921 -0.4880
2 18 29 -0.6367 -1.4132
2 19 0 -0.6078 0.0666
2 19 1 -2.8332 -4.6363
2 19 2 -1.7904 4.6331
2 19 3 -5.1355 2.1928
2 19 4 2.1676 -2.5118
2 19 5 -2.9750 6.8530
2 19 6 0.0801 0.8712
2 19 7 3.6247 -5.3437
2 19 8 -2.3970 1.7386
2 19 9 5.3583 -2.9292
2 19 10 3.0503 0.5038
2 19 11 2.7251 5.3015
2 19 12 3.4741 -0.4257
2 19 13 -1.9550 -0.0923
2 19 14 -5.4376 -2.0846
2 19 15 -3.9756 -7.1689
2 19 16 -1.6145 -0.8986
2 19 17 -1.8429 4.4158
2 19 18 3.9359 0.3331
2 19 19 -1.6699 4.0536
2 19 20 -2.7315 0.2166
2 19 21 2.5700 -1.9726
2 19 22 -0.5850 -1.2112
2 19 23 3.0281 -0.0068
2 19 24 0.4182 0.9856
2 19 25 -0.7443 0.5332
2 19 26 2.4666 1.2048
2 19 27 -2.6139 -1.2017
2 19 28 -1.5553 0.5513
2 20 0 5.6134 -0.0715
2 20 1 0.1438 5.2219
2 20 2 -3.0312 3.0238
2 20 3 3.7366 -0.5557
2 20 4 -0.5247 0.5879
2 20 5 0.4734 -6.4192
2 20 6 3.1722 -1.0117
2 20 7 -3.1251 -2.5797
2 20 8 -1.1565 -1.3347
2 20 9 0.7683 0.5086
2 20 10 -1.8770 -1.4737
2 20 11 3.2740 1.8202
2 20 12 -1.4158 -1.4159
2 20 13 -2.4103 4.3824
2 20 14 0.0310 2.5747
2 20 15 -0.2190 2.9196
2 20 16 0.2990 1.4201
2 20 17 1.9163 -2.1013
2 20 18 1.7667 2.7956
2 20 19 -0.6692 -3.2141
2 20 20 -0.3432 -2.3212
2 20 21 0.7452 -0.6833
2 20 22 1.9123 -2.0585
2 20 23 -2.7581 0.6635
2 20 24 -0.0135 -0.4866
2 20 25 -1.0729 1.0141
2 20 26 -0.4608 0.4955
2 20 27 1.3993 0.2604
2 21 0 2.9761 0.0209
2 21 1 -3.8277 -4.1445
2 21 2 1.6055 0.3130
2 21 3 -5.9371 3.3144
2 21 4 -0.5915 -4.1813
2 21 5 2.1042 2.1878
2 21 6 -4.9346 4.2696
2 21 7 2.2111 -3.3841
2 21 8 -4.5797 1.0861
2 21 9 0.1239 -1.6976
2 21 10 3.4885 -3.0458
2 21 11 2.5123 5.2904
2 21 12 6.7440 1.1807
2 21 13 1.3738 0.1617
2 21 14 -1.1877 1.4618
2 21 15 -1.7966 -3.8208
2 21 16 0.9433 -6.3823
2 21 17 -3.9825 2.8547
2 21 18 0.2718 1.9639
2 21 19 -0.3447 0.2139
2 21 20 -4.5969 2.5932
2 21 21 2.4970 -0.0092
2 21 22 -2.0259 -2.5756
2 21 23 0.2196 -0.2275
2 21 24 1.6598 1.7569
2 21 25 -1.5346 -1.1639
2 21 26 3.2811 2.2607
2 22 0 3.5970 -0.0525
2 22 1 2.9381 1.6179
2 22 2 -3.2028 4.7641
2 22 3 1.1503 -0.9978
2 22 4 -1.6340 4.9906
2 22 5 -1.3161 -1.0402
2 22 6 4.2261 -0.8227
2 22 7 -0.5628 -0.0839
2 22 8 -0.6104 -4.1535
2 22 9 2.7145 -0.4814
2 22 10 -3.5574 -5.3414
2 22 11 1.2883 1.6742
2 22 12 2.1026 -0.9512
2 22 13 -3.1312 -0.7164
2 22 14 -0.5717 1.7170
2 22 15 0.4392 0.4080
2 22 16 0.3912 3.9687
2 22 17 -0.5647 0.5867
2 22 18 1.9963 4.0544
2 22 19 0.2918 -0.5627
2 22 20 -1.1951 -1.2838
2 22 21 0.2077 -0.0104
2 22 22 3.1680 -1.0355
2 22 23 -1.4598 0.7756
2 22 24 -0.8305 -3.0699
2 22 25 -0.3204 -0.6656
2 23 0 4.8816 -0.0709
2 23 1 -2.0240 -0.5821
2 23 2 2.2816 -2.1891
2 23 3 -0.1616 1.3843
2 23 4 -2.9980 -1.2451
2 23 5 4.6854 -1.2141
2 23 6 -3.9544 1.7464
2 23 7 -0.1407 -0.7787
2 23 8 -3.8361 0.0892
2 23 9 -5.1429 0.6917
2 23 10 1.5915 -4.1591
2 23 11 -1.6023 1.6470
2 23 12 4.8390 2.5837
2 23 13 3.1422 -0.7448
2 23 14 2.5290 1.5144
2 23 15 0.6815 1.4500
2 23 16 2.5853 -5.3453
2 23 17 -0.7340 -1.4762
2 23 18 -2.7029 2.9218
2 23 19 0.9907 -1.4235
2 23 20 -2.6965 0.6230
2 23 21 1.5379 1.8767
2 23 22 -2.3640 -0.3307
2 23 23 -1.1569 -0.9423
2 24 0 -0.0991 0.0388
2 24 1 2.1428 -2.8587
2 24 2 -0.7177 1.3484
2 24 3 0.7292 -1.1323
2 24 4 -2.0374 3.0482
2 24 5 -3.4323 4.2590
2 24 6 2.0715 1.6246
2 24 7 0.0084 3.3242
2 24 8 -0.0801 -3.8278
2 24 9 3.6966 0.9186
2 24 10 -1.5569 -3.8434
2 24 11 -2.4067 -2.2333
2 24 12 2.4975 0.8847
2 24 13 -1.1510 -3.9091
2 24 14 -0.7912 -0.5211
2 24 15 0.8588 -1.9101
2 24 16 1.1180 3.2127
2 24 17 -0.9797 1.3032
2 24 18 -0.4391 1.4575
2 24 19 -0.0996 1.5363
2 24 20 0.2207 0.4484
2 24 21 0.4148 0.4225
2 24 22 2.0094 0.3194
2 25 0 1.7958 0.0102
2 25 1 0.3142 2.5572
2 25 2 -0.1505 -0.2786
2 25 3 3.7611 -1.7631
2 25 4 -1.1120 -0.0931
2 25 5 3.7316 0.1968
2 25 6 -0.2236 -0.9434
2 25 7 -0.4138 0.1068
2 25 8 0.7644 -0.0266
2 25 9 -5.9575 1.1228
2 25 10 -0.3039 -1.4160
2 25 11 -4.6133 -1.9264
2 25 12 -1.8621 1.6474
2 25 13 1.5470 -0.6281
2 25 14 3.4744 -1.0294
2 25 15 3.5431 2.3425
2 25 16 0.9723 0.0159
2 25 17 2.7862 -1.9401
2 25 18 -2.0789 1.2843
2 25 19 -0.8589 -1.1353
2 25 20 0.6327 -1.4005
2 25 21 0.6926 -0.0177
2 26 0 -0.6757 0.0249
2 26 1 -0.2285 -2.5794
2 26 2 -0.0794 -2.8348
2 26 3 0.9951 -1.5823
2 26 4 0.3486 -1.3924
2 26 5 -3.8152 3.4807
2 26 6 0.2962 1.9742
2 26 7 -0.4877 4.8483
2 26 8 -1.2279 -1.1017
2 26 9 2.5734 0.5182
2 26 10 1.2058 2.1432
2 26 11 -3.0509 -3.4126
2 26 12 -0.2911 0.8283
2 26 13 -0.1989 -2.8369
2 26 14 -0.2134 -1.6494
2 26 15 1.6722 -2.3784
2 26 16 1.2913 0.3418
2 26 17 0.1065 2.0062
2 26 18 -1.3953 -1.9794
2 26 19 -2.2670 1.5246
2 27 0 -0.8169 0.0604
2 27 1 1.5770 2.5700
2 27 2 -2.1030 2.9946
2 27 3 2.3525 -1.1970
2 27 4 0.2362 -1.6035
2 27 5 0.6094 0.3344
2 27 6 2.1851 -0.1493
2 27 7 -0.2469 -0.1100
2 27 8 4.4074 0.8175
2 27 9 -1.2751 0.8122
2 27 10 -1.0651 1.3228
2 27 11 -3.1468 -2.1967
2 27 12 -4.9747 -0.5122
2 27 13 -1.1786 -0.2741
2 27 14 0.1879 -2.3142
2 27 15 4.4200 -0.0499
2 27 16 -0.4047 2.4702
2 27 17 2.2004 0.9390
2 28 0 0.5973 -0.0258
2 28 1 -0.6865 -0.5878
2 28 2 -0.1719 -2.7305
2 28 3 -0.9363 0.0274
2 28 4 2.7573 -3.2521
2 28 5 -1.6611 -0.2244
2 28 6 -0.8155 -0.1207
2 28 7 1.1333 1.9245
2 28 8 -2.1003 2.4268
2 28 9 -0.2610 0.1429
2 28 10 1.9301 3.4648
2 28 11 -1.2583 -1.6216
2 28 12 -2.2162 -0.9228
2 28 13 -0.6369 -1.2258
2 28 14 -0.2710 -0.2933
2 28 15 2.1142 0.6822
2 29 0 -2.5390 0.0477
2 29 1 2.9530 0.3879
2 29 2 -1.0221 3.4222
2 29 3 0.1678 1.5335
2 29 4 0.6201 -0.7615
2 29 5 -3.2040 -2.1739
2 29 6 1.1085 0.2725
2 29 7 1.0346 0.1339
2 29 8 3.1711 0.9910
2 29 9 2.6868 1.0868
2 29 10 -0.2029 2.6377
2 29 11 -2.7485 -0.3702
2 29 12 -3.0357 -1.5484
2 30 0 1.2095 -0.0889
2 30 1 0.0419 0.4770
2 30 2 0.7979 -2.2460
2 30 3 -2.6405 1.8083
2 30 4 1.5870 -0.8140
2 30 5 1.1185 -2.6593
2 30 6 -1.4934 -1.4199
2 30 7 2.8364 -1.6341
2 30 8 -0.2734 2.1432
3 0 1 -1.3650 -7.9542
3 0 2 23.1571 1.1497
3 0 3 -1.0988 5.4875
3 0 4 17.4932 -0.2459
3 0 5 1.8570 -14.6809
3 0 6 0.7471 -1.0459
3 0 7 0.6458 -8.5694
3 0 8 -21.1036 0.2648
3 0 9 -1.9138 27.5097
3 0 10 -7.0405 1.0124
3 0 11 -0.1534 11.0471
3 0 12 8.9068 -0.5196
3 0 13 1.6941 -18.3876
3 0 14 3.2182 -0.8411
3 0 15 -0.1206 -13.4832
3 0 16 -2.4399 0.7246
3 0 17 -1.5300 11.6120
3 0 18 8.3043 0.5946
3 0 19 0.4793 0.1586
3 0 20 -1.4815 -0.7950
3 0 21 1.1265 -3.0944
3 0 22 -10.9401 -0.2750
3 0 23 -0.5671 2.7798
3 0 24 2.8914 0.6923
3 0 25 -0.8299 5.5534
3 0 26 3.8074 0.0697
3 0 27 0.6334 -2.1948
3 0 28 1.1794 -0.5845
3 0 29 0.5513 -6.4603
3 0 30 0.7049 0.0820
3 0 31 -0.6373 1.5349
3 0 32 -2.7533 0.3954
3 0 33 -0.2779 2.4904
3 0 34 -3.1862 -0.1289
3 0 35 0.5288 -2.4494
3 1 0 0.3700 0.3510
3 1 1 -8.9538 0.0637
3 1 2 -13.4885 -13.5324
3 1 3 6.2791 -9.2472
3 1 4 3.0806 -12.2822
3 1 5 -3.8983 -13.8441
3 1 6 -0.6992 32.6249
3 1 7 16.4266 7.9857
3 1 8 5.7862 18.4241
3 1 9 4.4589 15.8945
3 1 10 3.6966 -28.3568
3 1 11 -14.7986 -4.2045
3 1 12 -1.1022 -12.0055
3 1 13 -11.9412 -9.2982
3 1 14 -5.9292 17.3260
3 1 15 9.3916 4.0881
3 1 16 -0.5490 2.0742
3 1 17 6.9734 1.3748
3 1 18 0.8517 -12.4354
3 1 19 -3.7976 -5.4123
3 1 20 -0.1236 8.9694
3 1 21 -0.3945 1.2159
3 1 22 2.0360 6.5997
3 1 23 3.3900 5.1406
3 1 24 0.4209 -7.6432
3 1 25 0.7070 0.1136
3 1 26 1.2899 -5.3940
3 1 27 -8.0393 -3.8267
3 1 28 -2.4430 4.4991
3 1 29 -0.4169 -0.1142
3 1 30 -1.2563 5.2134
3 1 31 6.2419 1.4199
3 1 32 0.5591 -1.7895
3 1 33 0.0521 -0.5174
3 1 34 0.5619 -2.1776
3 1 35 -3.5775 0.4624
3 2 0 1.2466 15.9138
3 2 1 -27.2530 2.2624
3 2 2 4.2725 -3.8342
3 2 3 11.8281 5.3917
3 2 4 7.6918 1.3699
3 2 5 19.3485 -12.8661
3 2 6 6.8548 -7.7581
3 2 7 3.9698 -8.6961
3 2 8 -10.3995 -12.9468
3 2 9 -3.9759 16.6417
3 2 10 -6.6998 11.4912
3 2 11 -3.6602 11.1122
3 2 12 4.6913 13.3575
3 2 13 -2.5111 -11.7772
3 2 14 3.6550 -2.0909
3 2 15 -4.6760 -9.8603
3 2 16 -2.7561 -9.1310
3 2 17 0.4126 7.6244
3 2 18 2.7984 3.5676
3 2 19 10.4448 3.4475
3 2 20 0.9330 -3.9597
3 2 21 0.9364 -4.3158
3 2 22 -5.6070 -1.7339
3 2 23 -5.6988 -0.5517
3 2 24 1.5235 3.1025
3 2 25 -0.9243 5.0427
3 2 26 2.4385 3.7613
3 2 27 0.9705 -0.3282
3 2 28 0.9334 -0.0633
3 2 29 -0.8512 -4.9773
3 2 30 -0.1613 -2.7793
3 2 31 2.0210 0.3662
3 2 32 -2.7926 0.2837
3 2 33 2.0300 3.8806
3 2 34 -1.4919 -0.5624
3 2 35 -1.4814 -2.5831
3 3 0 -0.0895 8.8013
3 3 1 7.2108 -3.2103
3 3 2 -19.9479 0.7463
3 3 3 -11.9059 -16.8667
3 3 4 0.2456 -10.1371
3 3 5 -4.4403 -20.6563
3 3 6 -3.4559 0.8408
3 3 7 8.6202 10.0430
3 3 8 11.9106 6.8511
3 3 9 8.3399 24.6081
3 3 10 9.1350 -2.5122
3 3 11 -7.2757 -1.6224
3 3 12 -2.5173 -2.1130
3 3 13 -4.7295 -13.9266
3 3 14 -10.8487 3.3752
3 3 15 5.5608 2.5422
3 3 16 -1.8110 1.4136
3 3 17 1.9123 0.8647
3 3 18 1.7978 -5.2072
3 3 19 -4.3043 -5.9125
3 3 20 1.4965 1.2695
3 3 21 -1.7846 1.6728
3 3 22 2.4791 1.8487
3 3 23 3.9410 7.4781
3 3 24 0.6858 -1.9470
3 3 25 0.3973 0.5752
3 3 26 2.5114 -0.2113
3 3 27 -2.2621 -6.1616
3 3 28 -4.5618 1.8624
3 3 29 -1.0892 -0.5630
3 3 30 -3.3380 2.2451
3 3 31 3.1283 2.2476
3 3 32 1.9840 -1.4061
3 3 33 -0.2070 0.1728
3 3 34 2.7414 -3.2325
3 4 0 0.6331 7.9628
3 4 1 -24.6571 12.7685
3 4 2 -32.3885 1.5602
3 4 3 13.2256 5.7320
3 4 4 -4.3615 4.4537
3 4 5 14.4939 -2.7683
3 4 6 19.5888 -9.6597
3 4 7 -1.1511 -9.3719
3 4 8 -1.1947 -15.5324
3 4 9 3.0820 -4.0420
3 4 10 -4.8132 8.5379
3 4 11 0.9295 9.2711
3 4 12 7.0545 15.4203
3 4 13 -7.5195 -0.9458
3 4 14 0.7631 -1.4985
3 4 15 -7.6368 -1.9599
3 4 16 -10.7051 -8.6988
3 4 17 4.4450 2.9015
3 4 18 -2.3267 0.4203
3 4 19 10.2158 4.7455
3 4 20 9.5263 -0.9126
3 4 21 -1.6865 -5.7671
3 4 22 -0.0591 -0.5159
3 4 23 -4.7295 -3.9332
3 4 24 -2.6816 1.7526
3 4 25 -0.1386 2.9131
3 4 26 2.1459 3.8089
3 4 27 1.9750 2.3675
3 4 28 1.0677 -0.1466
3 4 29 -1.4450 -0.9603
3 4 30 -3.6662 -2.9825
3 4 31 2.1674 -1.2865
3 4 32 -2.0527 -1.0322
3 4 33 1.3645 3.4899
3 4 34 3.5381 1.5369
3 5 0 0.0742 20.9985
3 5 1 16.4022 -4.7312
3 5 2 -3.9255 11.1750
3 5 3 -13.8404 -8.0913
3 5 4 -6.7767 -13.2871
3 5 5 -9.6452 -3.6503
3 5 6 -4.7548 -18.5086
3 5 7 -3.1667 -0.9559
3 5 8 5.2559 -0.6753
3 5 9 10.6937 5.3042
3 5 10 9.9134 8.4900
3 5 11 0.6907 4.8210
3 5 12 -3.5703 7.6391
3 5 13 -0.2963 -1.4787
3 5 14 -5.4667 0.0992
3 5 15 4.9730 -1.1974
3 5 16 0.9385 -2.1057
3 5 17 -3.2313 -3.0425
3 5 18 0.3497 -4.7865
3 5 19 -6.7473 -0.9819
3 5 20 1.4471 -2.0896
3 5 21 0.4156 0.7672
3 5 22 0.8436 0.9001
3 5 23 3.5740 3.0693
3 5 24 0.7986 1.1954
3 5 25 0.1545 -0.9000
3 5 26 -0.5373 2.6534
3 5 27 2.5041 -2.7096
3 5 28 -1.8262 0.0374
3 5 29 -1.2346 1.0282
3 5 30 -1.7473 -0.1846
3 5 31 -1.6092 1.7259
3 5 32 1.6168 -1.9733
3 5 33 0.0011 0.0569
3 5 34 3.3279 -2.9163
3 6 0 0.0593 -2.1156
3 6 1 1.9867 7.8848
3 6 2 -46.7330 3.3707
3 6 3 -1.3451 9.1775
3 6 4 -7.9571 1.6154
3 6 5 -5.1212 6.8534
3 6 6 25.8518 2.3337
3 6 7 -0.1717 -7.8646
3 6 8 -3.3554 -7.7446
3 6 9 6.4448 -12.3795
3 6 10 -4.3448 -4.0634
3 6 11 1.4106 4.0840
3 6 12 14.1691 8.1007
3 6 13 -1.0319 3.1159
3 6 14 -1.4943 -1.3014
3 6 15 -3.2622 1.3078
3 6 16 -17.9336 -2.8183
3 6 17 -1.3716 4.1030
3 6 18 -2.9225 -1.0805
3 6 19 0.3131 0.2218
3 6 20 15.2640 3.1170
3 6 21 2.0804 -5.2668
3 6 22 1.4595 0.3226
3 6 23 0.2893 -3.5127
3 6 24 -6.2822 -0.3060
3 6 25 -1.9125 1.6378
3 6 26 1.2837 0.6663
3 6 27 3.1108 3.8775
3 6 28 2.3399 -1.0834
3 6 29 0.5266 0.8136
3 6 30 -4.3747 -0.1286
3 6 31 -0.9287 -2.1913
3 6 32 -1.5284 -0.7275
3 6 33 -2.6070 0.9262
3 6 34 5.3964 1.6535
3 7 0 0.1281 23.6249
3 7 1 13.3404 -1.1700
3 7 2 7.7003 10.1771
3 7 3 -3.9911 8.0812
3 7 4 0.4153 -16.5086
3 7 5 -11.5564 10.3077
3 7 6 -3.9881 -13.1811
3 7 7 -4.4044 -10.3802
3 7 8 -6.6061 2.4473
3 7 9 4.2601 -11.3909
3 7 10 5.8930 1.4949
3 7 11 3.6408 3.0801
3 7 12 -3.1517 5.8357
3 7 13 -2.0860 9.6013
3 7 14 -0.5743 4.7217
3 7 15 5.2587 2.0353
3 7 16 6.3205 -1.1213
3 7 17 -1.8934 -3.7505
3 7 18 -0.0109 -6.9755
3 7 19 -7.4178 -1.4537
3 7 20 -3.1800 -3.1173
3 7 21 1.6997 -1.6784
3 7 22 0.4915 3.5104
3 7 23 3.1959 0.3776
3 7 24 0.5386 1.8643
3 7 25 1.6197 -1.6517
3 7 26 -2.9603 0.1214
3 7 27 0.6940 1.2420
3 7 28 2.0225 -1.2111
3 7 29 -0.8841 1.9352
3 7 30 1.4583 -0.0503
3 7 31 -2.4845 1.3379
3 7 32 -1.4042 -0.6650
3 7 33 0.8411 -0.5763
3 7 34 1.4691 -2.1841
3 8 0 0.1465 -3.6508
3 8 1 22.7271 3.8848
3 8 2 -25.2856 -3.7523
3 8 3 -12.8251 9.4391
3 8 4 -5.8744 -0.3350
3 8 5 -20.1315 -0.3033
3 8 6 16.0609 12.3233
3 8 7 5.0467 -0.0039
3 8 8 -3.1770 1.4283
3 8 9 5.0464 -2.6844
3 8 10 -4.7752 -7.9363
3 8 11 -1.8508 -2.0577
3 8 12 10.6840 -1.2820
3 8 13 7.1404 0.5976
3 8 14 0.5781 -1.0597
3 8 15 3.4163 -0.5122
3 8 16 -11.0204 -0.5043
3 8 17 -8.6497 5.3446
3 8 18 -3.3189 2.1556
3 8 19 -9.6645 -2.9859
3 8 20 8.3108 3.5263
3 8 21 7.0488 -3.0496
3 8 22 2.0690 -0.0186
3 8 23 5.5569 -1.4501
3 8 24 -4.5604 -2.2522
3 8 25 -3.5679 2.4685
3 8 26 -0.5699 -2.2185
3 8 27 1.2617 2.3049
3 8 28 1.9936 0.0700
3 8 29 1.9654 -0.8289
3 8 30 -0.5472 2.1139
3 8 31 -1.7662 -1.3424
3 8 32 -0.9888 -0.0795
3 8 33 -5.4501 0.5293
3 9 0 -0.1143 14.9330
3 9 1 4.1087 2.1983
3 9 2 10.1487 1.2221
3 9 3 -0.9730 16.0490
3 9 4 7.8957 -12.9304
3 9 5 -3.0821 11.1763
3 9 6 -3.2432 1.6684
3 9 7 2.8846 -12.3735
3 9 8 -4.8750 8.8968
3 9 9 -2.6092 -13.2165
3 9 10 -2.6398 -8.2828
3 9 11 0.8821 0.2323
3 9 12 -1.2215 -4.2037
3 9 13 -4.7785 10.3155
3 9 14 0.6251 9.1091
3 9 15 2.7564 3.8340
3 9 16 5.9419 3.4735
3 9 17 2.6975 0.1817
3 9 18 1.8940 -5.6464
3 9 19 -3.4221 -2.1731
3 9 20 -5.6673 -3.3509
3 9 21 -0.8047 -5.3343
3 9 22 -0.4200 4.5053
3 9 23 3.2524 0.2246
3 9 24 -0.3533 0.0523
3 9 25 1.3857 0.3328
3 9 26 -0.6172 -2.8092
3 9 27 -2.8752 2.4871
3 9 28 2.2748 -0.3281
3 9 29 0.6980 0.4568
3 9 30 2.5628 0.2712
3 9 31 0.0986 0.3861
3 9 32 -3.2554 0.6579
3 9 33 0.1971 0.8402
3 10 0 -0.0153 -4.9210
3 10 1 19.5211 3.4977
3 10 2 2.3225 -5.8102
3 10 3 -9.0884 1.7559
3 10 4 0.5578 2.8413
3 10 5 -18.1966 -8.8867
3 10 6 1.4620 4.3634
3 10 7 3.4394 3.1853
3 10 8 -2.5602 5.8193
3 10 9 4.1533 8.5599
3 10 10 -4.8493 0.1186
3 10 11 -2.3204 -0.3108
3 10 12 5.1682 -6.5449
3 10 13 6.7632 -5.3815
3 10 14 2.6323 -0.0496
3 10 15 5.5539 -1.6065
3 10 16 -0.3704 -1.0529
3 10 17 -7.2132 3.3265
3 10 18 -1.7707 3.9889
3 10 19 -10.5340 -1.8299
3 10 20 -2.5777 1.4437
3 10 21 5.1267 -1.3513
3 10 22 0.0623 -0.2356
3 10 23 5.5610 1.5762
3 10 24 0.1646 -2.8340
3 10 25 -2.3004 2.5247
3 10 26 0.2735 -1.7813
3 10 27 -0.1816 -1.9415
3 10 28 -0.4523 0.9383
3 10 29 0.2381 -1.5576
3 10 30 1.6230 1.1284
3 10 31 -0.1936 0.6329
3 10 32 0.4630 0.3896
3 10 33 -4.2836 1.5069
3 11 0 0.0010 5.7845
3 11 1 -4.6818 4.8908
3 11 2 4.2596 -6.0712
3 11 3 -0.0964 10.3592
3 11 4 3.7258 -7.0665
3 11 5 3.4031 2.3847
3 11 6 0.5954 11.6958
3 11 7 5.2030 -6.7054
3 11 8 3.0575 11.6398
3 11 9 2.5761 -2.5658
3 11 10 -7.1307 -14.0166
3 11 11 -6.4224 -1.6600
3 11 12 0.7840 -10.4920
3 11 13 -4.7100 -0.5282
3 11 14 0.2396 10.5728
3 11 15 2.3977 4.7974
3 11 16 0.6554 4.4486
3 11 17 3.2732 5.7239
3 11 18 2.4873 -2.7031
3 11 19 0.1612 -2.1478
3 11 20 -2.3491 -0.4992
3 11 21 -1.9545 -6.0467
3 11 22 -1.3054 3.3352
3 11 23 2.7395 2.2415
3 11 24 -0.5471 -2.9579
3 11 25 -1.6169 0.5938
3 11 26 0.8759 -2.9938
3 11 27 -2.7712 0.3673
3 11 28 0.0884 1.6086
3 11 29 1.2871 0.4620
3 11 30 2.7096 0.5427
3 11 31 2.5204 0.0311
3 11 32 -2.0559 -0.4206
3 12 0 -0.0090 -2.1416
3 12 1 5.2929 1.3399
3 12 2 10.6099 -0.8661
3 12 3 -2.4727 -3.4666
3 12 4 4.8946 1.3729
3 12 5 -4.1809 -6.7307
3 12 6 -3.1935 -4.4344
3 12 7 0.7270 -3.6129
3 12 8 -4.0668 3.1048
3 12 9 1.0527 11.7601
3 12 10 -4.2389 5.1451
3 12 11 -4.0519 5.8135
3 12 12 1.7900 -1.9736
3 12 13 4.7186 -9.9821
3 12 14 2.6160 -1.5006
3 12 15 4.8326 -0.8312
3 12 16 5.7415 -1.2803
3 12 17 -3.0431 1.8873
3 12 18 0.1985 2.6606
3 12 19 -3.5462 0.8018
3 12 20 -5.5460 -0.8242
3 12 21 0.9426 -2.1229
3 12 22 -2.0235 -0.4842
3 12 23 -0.0964 3.2280
3 12 24 1.0353 0.1975
3 12 25 -0.7656 1.7598
3 12 26 1.3209 -0.0274
3 12 27 1.7063 -3.2388
3 12 28 -0.4550 -0.6807
3 12 29 -1.4776 -1.6356
3 12 30 0.7385 -0.3907
3 12 31 -0.2069 0.7736
3 12 32 0.6437 0.4828
3 13 0 0.1040 -1.0734
3 13 1 -3.7883 7.1359
3 13 2 -5.3546 -4.1956
3 13 3 -1.2326 1.2442
3 13 4 -1.2367 -2.4333
3 13 5 -0.6929 -7.3238
3 13 6 4.0432 8.2867
3 13 7 6.4763 0.8259
3 13 8 2.5733 8.3013
3 13 9 8.8535 9.7635
3 13 10 -0.4543 -7.7692
3 13 11 -11.7315 -3.1165
3 13 12 -0.7281 -7.5574
3 13 13 -2.0939 -11.4612
3 13 14 -1.8582 1.2129
3 13 15 4.4377 4.9267
3 13 16 -1.1059 2.2578
3 13 17 0.9599 7.2061
3 13 18 1.1319 2.0553
3 13 19 -1.6511 -2.3790
3 13 20 1.2733 1.6630
3 13 21 0.0371 -3.1908
3 13 22 -0.1660 1.6395
3 13 23 2.8451 4.5775
3 13 24 -0.1732 -2.0733
3 13 25 -2.8663 -0.6505
3 13 26 -0.5857 -1.9012
3 13 27 -2.0459 -2.6404
3 13 28 -0.3559 0.4557
3 13 29 0.3318 1.2193
3 13 30 0.6794 1.5707
3 13 31 3.7721 1.6274
3 14 0 0.0562 1.5575
3 14 1 -2.7926 0.9840
3 14 2 5.8792 2.7458
3 14 3 -0.5690 0.0982
3 14 4 1.8839 -1.4388
3 14 5 5.5550 -4.7046
3 14 6 0.6100 -4.0348
3 14 7 1.2112 -7.4863
3 14 8 -2.2563 -3.8870
3 14 9 -1.6885 9.3565
3 14 10 -2.8254 4.7586
3 14 11 -4.1363 5.2348
3 14 12 -3.3357 5.8697
3 14 13 0.4158 -6.5438
3 14 14 1.8254 -4.1214
3 14 15 0.7169 -1.1928
3 14 16 6.9019 -1.6840
3 14 17 2.2220 2.4632
3 14 18 0.2668 0.7195
3 14 19 2.7723 1.9853
3 14 20 -0.5463 -0.5713
3 14 21 -1.0454 -4.6112
3 14 22 -1.2935 -0.9824
3 14 23 -2.8808 1.7476
3 14 24 -2.2093 2.4490
3 14 25 -0.7896 2.6315
3 14 26 0.0709 0.4076
3 14 27 2.0229 -1.6746
3 14 28 2.0278 -0.3405
3 14 29 -0.3885 -2.1952
3 14 30 -0.0073 -1.1671
3 14 31 -0.6115 1.1206
3 15 0 -0.0290 -5.8321
3 15 1 2.6329 3.8308
3 15 2 -5.7648 1.3817
3 15 3 -4.5009 -2.5390
3 15 4 -2.2561 0.9251
3 15 5 -6.4646 -8.0318
3 15 6 -0.1075 -1.1040
3 15 7 8.7818 2.8783
3 15 8 1.5342 1.9666
3 15 9 5.8712 10.7602
3 15 10 7.6212 3.1625
3 15 11 -7.9375 -0.2351
3 15 12 -4.2263 -0.2652
3 15 13 -0.4733 -8.3807
3 15 14 -3.7369 -7.9357
3 15 15 4.2882 -0.7870
3 15 16 0.9698 -0.7851
3 15 17 -0.7588 1.7988
3 15 18 0.8893 3.5202
3 15 19 -5.3858 -1.0927
3 15 20 -0.0247 2.1706
3 15 21 2.4243 -0.1880
3 15 22 1.0119 0.1896
3 15 23 3.4194 4.3164
3 15 24 0.5891 0.6918
3 15 25 -1.9830 0.1349
3 15 26 -1.0526 -0.0685
3 15 27 -1.9159 -3.1978
3 15 28 -0.5179 -1.9498
3 15 29 1.7374 0.1518
3 15 30 -2.0113 1.2273
3 16 0 -0.0670 1.9017
3 16 1 -4.3038 0.4304
3 16 2 -0.1607 2.0876
3 16 3 0.5010 4.4709
3 16 4 -1.7340 0.8060
3 16 5 4.9623 -3.4657
3 16 6 4.0358 -2.8281
3 16 7 2.8559 -5.4721
3 16 8 0.4311 -7.5079
3 16 9 -1.1008 3.3364
3 16 10 -1.4456 3.8767
3 16 11 -1.5321 1.8265
3 16 12 -2.1377 6.6556
3 16 13 -4.5217 -0.0097
3 16 14 0.3787 -2.3718
3 16 15 -3.3263 -1.4314
3 16 16 -0.9425 -2.5974
3 16 17 4.1500 3.4174
3 16 18 1.0772 0.6518
3 16 19 3.7765 -0.0705
3 16 20 5.2795 1.2842
3 16 21 0.8843 -4.4779
3 16 22 -0.8299 -1.5791
3 16 23 -0.5354 -0.0799
3 16 24 -3.3100 0.8419
3 16 25 -2.0057 2.5106
3 16 26 -0.6592 0.7763
3 16 27 -0.1505 -1.2172
3 16 28 2.6020 0.6491
3 16 29 1.7125 -0.1481
3 17 0 -0.1083 -2.3244
3 17 1 4.8351 -3.1948
3 17 2 -0.8601 2.2290
3 17 3 -3.9379 -2.9423
3 17 4 -0.5746 0.7965
3 17 5 -6.8885 -2.1129
3 17 6 -6.8497 -4.9436
3 17 7 4.8996 1.1386
3 17 8 2.9809 -2.5188
3 17 9 2.0920 4.0328
3 17 10 8.6403 6.3192
3 17 11 -0.4431 2.5344
3 17 12 -3.5033 3.9715
3 17 13 -0.4948 -0.0190
3 17 14 -4.1965 -3.9178
3 17 15 2.7701 -3.5494
3 17 16 3.6699 -2.1958
3 17 17 -1.7743 -3.5516
3 17 18 0.5717 -0.3284
3 17 19 -4.7014 -1.8195
3 17 20 -4.0199 1.0930
3 17 21 1.9142 2.2589
3 17 22 1.7864 -1.2834
3 17 23 2.0984 2.1929
3 17 24 0.8476 1.5527
3 17 25 -0.3635 0.6877
3 17 26 -1.3993 1.6382
3 17 27 -0.4989 -1.0772
3 17 28 -1.4480 -2.2154
3 17 29 2.7528 -0.8595
3 18 0 0.0381 3.3795
3 18 1 -3.0121 1.2496
3 18 2 -5.6492 -1.5148
3 18 3 0.8153 4.8965
3 18 4 -1.5467 3.0443
3 18 5 0.6156 -0.6970
3 18 6 2.7554 -0.1383
3 18 7 3.7881 -3.4981
3 18 8 2.8118 -7.0061
3 18 9 0.2457 -1.7372
3 18 10 0.7942 0.4761
3 18 11 -2.3982 0.4635
3 18 12 2.0520 4.3245
3 18 13 -2.0007 0.5914
3 18 14 -1.0375 0.1626
3 18 15 -0.1899 1.0165
3 18 16 -7.7689 -2.1502
3 18 17 -2.0980 3.0904
3 18 18 0.4637 2.7414
3 18 19 1.7094 -1.6953
3 18 20 4.7290 0.4630
3 18 21 4.0651 -1.3672
3 18 22 0.0676 -0.2721
3 18 23 0.7093 -0.6796
3 18 24 -0.6053 -0.9425
3 18 25 -2.3949 0.6137
3 18 26 -0.3054 0.3527
3 18 27 -1.1494 -0.5785
3 18 28 1.1420 -1.2706
3 19 0 -0.0745 7.8161
3 19 1 4.5054 -4.5424
3 19 2 2.3505 -0.3385
3 19 3 -3.2996 -1.8646
3 19 4 2.3103 -2.8181
3 19 5 -2.5595 2.6790
3 19 6 -8.8157 -3.3393
3 19 7 -1.5106 -0.6358
3 19 8 0.4983 -3.7008
3 19 9 -0.2112 -2.7144
3 19 10 6.4444 4.2628
3 19 11 2.8446 1.5669
3 19 12 -0.9028 4.2956
3 19 13 1.2355 2.0487
3 19 14 -3.3362 1.8159
3 19 15 1.1046 0.4364
3 19 16 5.8530 -0.2960
3 19 17 -0.0976 -3.2502
3 19 18 -1.5342 -2.1811
3 19 19 -1.4047 -2.2019
3 19 20 -3.5331 -2.7643
3 19 21 -1.8585 3.7119
3 19 22 1.4890 -1.3358
3 19 23 1.4712 -1.0877
3 19 24 -0.7915 1.3527
3 19 25 1.2037 -0.5222
3 19 26 -1.6926 0.9177
3 19 27 -0.7256 1.3439
3 20 0 0.0809 0.1341
3 20 1 0.9396 5.2098
3 20 2 -7.4739 -2.9173
3 20 3 -0.8505 2.5524
3 20 4 -0.3249 4.4277
3 20 5 -2.4191 -0.6708
3 20 6 -0.7912 3.5131
3 20 7 0.3276 0.2603
3 20 8 4.0251 -5.2576
3 20 9 1.0695 -2.3735
3 20 10 3.8341 -2.4723
3 20 11 -2.3035 -2.5375
3 20 12 -0.1129 3.0497
3 20 13 3.5862 -1.2979
3 20 14 -2.0245 -2.2430
3 20 15 4.2477 2.6092
3 20 16 -3.4025 -0.0603
3 20 17 -6.2740 2.0356
3 20 18 -2.5258 2.9755
3 20 19 0.0866 -0.0499
3 20 20 0.6906 -0.5669
3 20 21 2.2326 -0.6791
3 20 22 2.0676 2.3101
3 20 23 -0.6626 0.6101
3 20 24 1.0443 -1.8473
3 20 25 -0.9655 0.4290
3 20 26 0.3210 -0.3291
3 21 0 0.0638 11.1294
3 21 1 2.1976 0.8474
3 21 2 5.8503 -1.4394
3 21 3 -2.3346 1.1995
3 21 4 1.9175 -5.2507
3 21 5 2.5440 3.4969
3 21 6 -5.2330 0.7830
3 21 7 -3.5565 -1.3715
3 21 8 -2.4066 -1.0020
3 21 9 -3.3627 -6.7287
3 21 10 2.1354 -0.1269
3 21 11 2.6023 -1.1393
3 21 12 -1.6511 2.3538
3 21 13 2.3384 1.6246
3 21 14 -0.3612 1.7710
3 21 15 -0.3584 3.3425
3 21 16 4.9603 1.4449
3 21 17 3.2115 -0.4736
3 21 18 -1.1637 -2.0964
3 21 19 -1.0668 1.0750
3 21 20 0.9501 -4.4347
3 21 21 -2.7100 2.2875
3 21 22 -2.0119 1.6543
3 21 23 2.4088 -3.1928
3 21 24 -0.6747 0.6469
3 21 25 0.7515 -1.6485
3 22 0 -0.0384 -6.6796
3 22 1 3.4619 3.6317
3 22 2 -2.6459 -0.6355
3 22 3 -0.8944 -0.9082
3 22 4 0.5085 4.9437
3 22 5 -2.9216 -1.4187
3 22 6 -1.7628 3.0460
3 22 7 -4.2935 3.9160
3 22 8 0.6837 -1.6054
3 22 9 0.1648 0.0501
3 22 10 2.9502 -0.7665
3 22 11 1.6381 -4.1484
3 22 12 -3.2771 0.1503
3 22 13 5.2064 -1.0631
3 22 14 -1.3758 -5.4550
3 22 15 2.8256 0.6301
3 22 16 2.8671 0.6194
3 22 17 -3.2802 1.6634
3 22 18 -2.9809 1.2473
3 22 19 -0.9734 -0.0500
3 22 20 0.1023 1.5459
3 22 21 -1.4443 -1.4639
3 22 22 2.2557 1.1246
3 22 23 -1.6951 2.9309
3 22 24 -0.0540 -1.8401
3 23 0 0.0674 3.9854
3 23 1 -1.8718 3.5891
3 23 2 4.5229 -0.6588
3 23 3 0.9767 3.6070
3 23 4 0.5168 -3.5557
3 23 5 3.3841 1.0001
3 23 6 0.0758 4.0243
3 23 7 -0.3838 -0.7127
3 23 8 -2.0399 3.5703
3 23 9 -2.9768 -3.2272
3 23 10 -2.5511 -3.6660
3 23 11 0.3152 -3.7733
3 23 12 -3.0191 -1.8682
3 23 13 -0.6712 0.4090
3 23 14 1.8009 0.0752
3 23 15 -0.4344 3.5731
3 23 16 2.0661 1.2091
3 23 17 3.0513 2.0191
3 23 18 2.1507 -2.3079
3 23 19 -1.3845 1.7341
3 23 20 1.7177 -1.5294
3 23 21 0.7824 -0.7796
3 23 22 -4.2782 3.5722
3 24 0 0.0044 -5.6944
3 24 1 1.0645 -1.3992
3 24 2 1.9958 0.7332
3 24 3 2.3992 -2.5651
3 24 4 1.7394 3.1303
3 24 5 -1.4487 -1.9190
3 24 6 0.0692 -0.0418
3 24 7 -3.6059 3.5182
3 24 8 -2.8894 0.6533
3 24 9 -1.3960 3.1205
3 24 10 -1.5309 2.4807
3 24 11 2.6366 -1.1129
3 24 12 -3.1326 -1.9791
3 24 13 2.6096 -0.2186
3 24 14 0.8206 -4.8180
3 24 15 -0.1297 -1.6893
3 24 16 3.9286 -0.4797
3 24 17 0.0216 0.2293
3 24 18 -0.3191 1.2385
3 24 19 -1.6623 -1.9349
3 24 20 0.3906 2.2456
3 24 21 -1.4905 0.2798
3 25 0 -0.0297 -2.5271
3 25 1 -2.1240 0.9741
3 25 2 -0.1969 -0.6365
3 25 3 0.3720 3.1568
3 25 4 -0.0401 -0.0033
3 25 5 1.5980 -1.7237
3 25 6 1.0711 3.1238
3 25 7 3.7968 -0.0789
3 25 8 0.6702 4.0349
3 25 9 0.0068 4.0471
3 25 10 -2.7581 -1.1145
3 25 11 -1.8916 -2.7794
3 25 12 -1.7444 -4.1458
3 25 13 -3.8206 -2.0321
3 25 14 0.9764 -2.1938
3 25 15 -0.6866 1.9089
3 25 16 -0.1397 0.2394
3 25 17 0.8932 2.6461
3 25 18 2.9028 0.2426
3 25 19 0.6055 -0.7021
3 26 0 0.0073 -1.3740
3 26 1 -1.6816 -2.3913
3 26 2 1.2251 1.2020
3 26 3 3.5596 -2.4413
3 26 4 3.0731 1.8532
3 26 5 0.6071 -1.1034
3 26 6 1.4191 -3.8253
3 26 7 0.1730 1.5716
3 26 8 -2.2837 0.1372
3 26 9 -1.3437 2.7119
3 26 10 -3.2075 3.6246
3 26 11 0.4655 2.0659
3 26 12 -1.3000 -1.6113
3 26 13 -1.1742 0.4979
3 26 14 1.2507 -1.2193
3 26 15 -1.3849 -1.9555
3 26 16 2.0317 -0.2638
3 26 17 0.9195 -1.8847
3 27 0 0.0642 -4.2830
3 27 1 -0.1240 -1.1613
3 27 2 -0.5075 -1.2521
3 27 3 -1.0711 0.5729
3 27 4 -2.4837 2.7083
3 27 5 0.4578 -2.0088
3 27 6 -0.1556 -0.3142
3 27 7 2.6200 0.2222
3 27 8 2.9770 0.3233
3 27 9 1.9326 5.1690
3 27 10 -1.1765 3.4112
3 27 11 -1.9666 0.8454
3 27 12 1.3740 -1.8679
3 27 13 -3.2536 -2.0904
3 27 14 0.0152 -2.9166
3 27 15 -0.8359 -0.7391
3 28 0 -0.0453 1.0201
3 28 1 -2.0845 -2.1708
3 28 2 0.1316 1.9473
3 28 3 1.1173 -1.4758
3 28 4 1.9001 -0.5365
3 28 5 2.1233 2.4698
3 28 6 1.5368 -4.7370
3 28 7 1.8475 -0.8623
3 28 8 0.6850 1.3417
3 28 9 -0.5380 0.0473
3 28 10 -2.0353 1.4354
3 28 11 -0.9060 2.4187
3 28 12 0.3965 -1.2728
3 28 13 -1.8906 0.1367
3 29 0 0.1048 -3.8152
3 29 1 0.6373 -2.5802
3 29 2 -0.0348 -0.5597
3 29 3 0.6382 -2.3359
3 29 4 -3.3591 2.7093
3 29 5 -1.4557 0.5868
3 29 6 1.1403 -2.7863
3 29 7 -0.1244 -0.1318
3 29 8 1.4534 -1.5246
3 29 9 2.2435 0.4746
3 30 0 -0.0147 2.9011
3 30 1 -2.3450 -0.7082
3 30 2 -0.5838 1.3674
3 30 3 0.3414 1.4106
4 0 0 -33.8384 -0.1153
4 0 1 1.4631 -10.7233
4 0 2 -8.1707 0.0001
4 0 3 -1.8363 11.6927
4 0 4 17.3661 0.3321
4 0 5 -1.0376 0.0231
4 0 6 12.0072 -0.0146
4 0 7 1.9756 -1.3884
4 0 8 7.3984 -0.5505
4 0 9 0.6983 -1.1701
4 0 10 0.5923 0.0876
4 0 11 -2.1342 0.1961
4 0 12 -17.4100 0.5879
4 0 13 -0.0374 2.4259
4 0 14 -13.3460 -0.2772
4 0 15 1.8806 2.8147
4 0 16 14.8114 -0.4206
4 0 17 -0.3515 -7.1324
4 0 18 11.3291 0.3924
4 0 19 -1.5470 3.9442
4 0 20 -7.2579 0.2388
4 0 21 0.6099 2.6277
4 0 22 0.7491 -0.3963
4 0 23 1.2115 -7.5971
4 0 24 3.6806 -0.1334
4 0 25 -0.8086 2.2165
4 0 26 -6.2661 0.3556
4 0 27 -0.7602 2.6516
4 0 28 -2.8565 0.0082
4 0 29 0.7614 1.6706
4 0 30 3.4934 -0.2191
4 0 31 0.4487 2.4696
4 0 32 3.2265 0.0268
4 0 33 -0.6739 -4.5451
4 0 34 0.1475 0.1370
4 1 0 1.4167 -0.4849
4 1 1 -4.0676 13.2648
4 1 2 1.0546 -22.0351
4 1 3 -6.0677 -3.7875
4 1 4 -7.3191 -14.9760
4 1 5 12.5162 -8.5588
4 1 6 3.6976 2.3208
4 1 7 3.3267 -7.6181
4 1 8 5.5680 10.4932
4 1 9 -14.6324 1.0881
4 1 10 -3.9942 11.8526
4 1 11 1.3165 7.2254
4 1 12 -1.5453 3.6217
4 1 13 14.7053 4.7012
4 1 14 2.8102 -15.0601
4 1 15 -7.0629 -2.1915
4 1 16 1.1991 -10.5017
4 1 17 -10.7766 -3.4411
4 1 18 -4.5783 11.5931
4 1 19 10.1214 -0.7056
4 1 20 2.6986 2.6901
4 1 21 0.4817 -1.3491
4 1 22 0.4100 -7.3320
4 1 23 -4.9210 -0.3512
4 1 24 -1.3376 6.6115
4 1 25 2.3510 1.6374
4 1 26 -0.2540 4.7664
4 1 27 4.6532 2.4549
4 1 28 1.5193 -6.7364
4 1 29 -0.4674 -0.6459
4 1 30 1.1388 -3.5934
4 1 31 -7.1789 -0.8271
4 1 32 -2.3026 2.0159
4 1 33 -0.0969 -1.3423
4 1 34 0.5778 3.4410
4 2 0 -13.7389 -0.0293
4 2 1 -18.1201 -3.7904
4 2 2 -4.8564 -15.7333
4 2 3 -19.5840 4.3549
4 2 4 7.0867 7.5719
4 2 5 -1.9691 -0.1216
4 2 6 5.6297 2.6700
4 2 7 5.0383 -0.5774
4 2 8 4.2925 -3.4309
4 2 9 11.5696 0.9081
4 2 10 3.9411 -5.8980
4 2 11 7.3646 -4.0806
4 2 12 -10.6520 7.0586
4 2 13 -5.3099 3.0229
4 2 14 -10.6129 3.1933
4 2 15 -11.2601 5.1736
4 2 16 11.7328 -2.9711
4 2 17 -1.4149 -6.9313
4 2 18 8.4619 -4.8641
4 2 19 2.1009 0.3605
4 2 20 -9.7815 4.5242
4 2 21 3.6502 3.7395
4 2 22 0.6993 3.4220
4 2 23 2.9827 -3.5385
4 2 24 5.2908 -6.8313
4 2 25 0.5333 -1.0409
4 2 26 -4.5057 1.2768
4 2 27 -1.7789 2.6418
4 2 28 -2.4695 1.3787
4 2 29 -2.2025 2.2183
4 2 30 3.4393 0.2869
4 2 31 -0.6962 1.2349
4 2 32 2.4376 0.3092
4 2 33 0.1797 -3.9677
4 3 0 1.8103 -0.3841
4 3 1 -1.3347 21.7952
4 3 2 2.2900 1.3236
4 3 3 -0.6000 -4.0189
4 3 4 -10.9864 -4.1138
4 3 5 -2.2044 -14.9945
4 3 6 3.8301 1.4139
4 3 7 3.6592 -15.7089
4 3 8 9.2433 -2.0881
4 3 9 -2.3056 0.9625
4 3 10 -4.6661 0.6238
4 3 11 -2.7706 12.9482
4 3 12 -3.4221 4.8137
4 3 13 8.1878 10.4058
4 3 14 4.7806 -3.6879
4 3 15 -3.7027 -4.0140
4 3 16 1.4186 -4.7972
4 3 17 -4.7070 -8.5196
4 3 18 -8.1329 8.0232
4 3 19 3.3927 -0.6157
4 3 20 4.9069 1.1174
4 3 21 2.1464 -0.9163
4 3 22 1.3193 -7.5785
4 3 23 -2.4794 -1.3837
4 3 24 -2.6983 2.5104
4 3 25 0.7432 2.5954
4 3 26 -0.5860 2.3789
4 3 27 2.0986 5.3676
4 3 28 4.0588 -2.3678
4 3 29 -0.3003 -1.5553
4 3 30 1.4947 -1.2023
4 3 31 -3.0416 -3.0392
4 3 32 -5.2516 2.7336
4 3 33 -1.5603 -2.1028
4 4 0 16.1487 0.0398
4 4 1 -14.0236 9.2425
4 4 2 0.6101 -15.2751
4 4 3 -16.7700 -9.4458
4 4 4 -6.1273 8.0810
4 4 5 -4.7676 -3.0487
4 4 6 -6.2430 5.5466
4 4 7 3.3919 5.0496
4 4 8 -3.3212 -7.1543
4 4 9 10.3231 3.8962
4 4 10 7.5402 -4.9493
4 4 11 8.8182 -12.5424
4 4 12 2.5081 7.0533
4 4 13 -4.1862 3.6062
4 4 14 -2.2192 3.8238
4 4 15 -12.9796 10.6362
4 4 16 3.0985 -2.0782
4 4 17 -0.6100 -6.3003
4 4 18 0.6415 -5.8590
4 4 19 4.4482 -6.9222
4 4 20 -10.0033 3.1363
4 4 21 2.2450 5.7668
4 4 22 0.9711 3.3440
4 4 23 1.8256 3.2708
4 4 24 5.8402 -5.4874
4 4 25 0.8186 -5.3767
4 4 26 -0.4174 -0.2238
4 4 27 -2.4063 1.1703
4 4 28 -0.6377 2.2089
4 4 29 -2.5268 2.7304
4 4 30 1.4578 1.8395
4 4 31 0.6397 -0.0210
4 4 32 -0.5061 -0.8936
4 4 33 1.1938 -2.8060
4 5 0 -2.3328 0.2837
4 5 1 0.8426 9.8465
4 5 2 2.5242 14.6934
4 5 3 0.1028 1.2015
4 5 4 0.2099 9.5915
4 5 5 -8.4711 -7.9515
4 5 6 -5.1486 3.4553
4 5 7 4.2693 -8.2364
4 5 8 2.9139 -14.6122
4 5 9 3.5495 0.1798
4 5 10 3.5766 -8.1239
4 5 11 -3.6064 5.6240
4 5 12 -3.0167 5.3572
4 5 13 2.6495 4.8457
4 5 14 1.3625 5.2749
4 5 15 -0.6843 -2.3448
4 5 16 -0.4830 1.7021
4 5 17 -1.3816 -4.0283
4 5 18 -4.0569 2.8116
4 5 19 -0.7621 0.2945
4 5 20 2.1699 -1.0412
4 5 21 2.5567 -0.3087
4 5 22 1.2412 -5.7368
4 5 23 -0.0558 -0.2964
4 5 24 -0.8551 -1.8451
4 5 25 -1.0532 1.6351
4 5 26 0.5577 0.6730
4 5 27 -0.7488 1.9669
4 5 28 3.0916 2.8254
4 5 29 1.5596 -2.1636
4 5 30 -0.4499 0.9597
4 5 31 0.3228 -1.7434
4 5 32 -4.1352 0.7876
4 5 33 -3.1748 -0.2489
4 6 0 23.2212 -0.0451
4 6 1 -0.1058 15.1085
4 6 2 4.9226 -1.6370
4 6 3 -1.6512 -14.7530
4 6 4 -8.2749 3.3450
4 6 5 -0.3400 -10.0259
4 6 6 -11.9615 1.7301
4 6 7 -1.9348 12.9490
4 6 8 -6.8617 -5.1432
4 6 9 -1.2337 4.5040
4 6 10 7.4826 1.8715
4 6 11 4.1209 -14.9732
4 6 12 7.2450 -0.1741
4 6 13 -0.3485 2.2370
4 6 14 2.5832 0.8783
4 6 15 -3.1928 12.9440
4 6 16 -1.7861 3.8421
4 6 17 1.3980 -4.7174
4 6 18 -4.3109 -2.7602
4 6 19 1.8823 -9.8510
4 6 20 -6.4044 -3.9932
4 6 21 -0.7530 6.2580
4 6 22 0.5855 1.4147
4 6 23 -0.8175 5.1055
4 6 24 5.4613 0.3791
4 6 25 -0.3517 -5.7458
4 6 26 2.4282 -1.3371
4 6 27 -1.2482 -1.8555
4 6 28 -1.5560 1.3631
4 6 29 0.6374 3.4375
4 6 30 -0.8673 2.8151
4 6 31 1.9705 0.0906
4 6 32 -1.0266 -1.6590
4 6 33 -0.8657 -2.4613
4 7 0 -7.6973 -0.0422
4 7 1 -1.1062 -4.7086
4 7 2 4.1205 12.4451
4 7 3 -7.2800 0.1544
4 7 4 8.0213 10.7597
4 7 5 0.4103 3.6413
4 7 6 -11.3833 3.2465
4 7 7 6.3390 7.6827
4 7 8 -2.1084 -12.5897
4 7 9 -1.8217 -2.5695
4 7 10 8.5379 -7.2082
4 7 11 -1.3623 -5.2481
4 7 12 -0.2103 5.7117
4 7 13 1.9923 -1.7376
4 7 14 -2.7896 3.7478
4 7 15 0.5621 -0.0900
4 7 16 -1.3110 1.5611
4 7 17 -3.2429 3.7981
4 7 18 -0.4712 1.7538
4 7 19 0.3891 0.6863
4 7 20 -0.3790 -1.2353
4 7 21 1.6423 -0.3383
4 7 22 0.2033 -4.0778
4 7 23 -0.5155 1.5297
4 7 24 1.8851 -2.5039
4 7 25 -2.5169 -1.4760
4 7 26 1.5496 2.1294
4 7 27 0.5372 -2.7106
4 7 28 -0.6086 3.1067
4 7 29 2.8965 -0.2736
4 7 30 -0.5454 0.0068
4 7 31 -0.1760 1.9345
4 7 32 -2.0305 -0.6680
4 7 33 -2.6950 0.1202
4 8 0 13.2067 -0.0855
4 8 1 8.6250 11.1002
4 8 2 2.3178 9.3746
4 8 3 10.1830 -8.5745
4 8 4 -5.3550 2.6702
4 8 5 4.8358 -13.7897
4 8 6 -3.0281 -8.7259
4 8 7 -4.8355 11.8771
4 8 8 -3.7565 -0.2089
4 8 9 -10.1899 4.5375
4 8 10 2.0889 6.7466
4 8 11 0.4163 -8.2582
4 8 12 3.6269 -4.6726
4 8 13 3.1809 -0.9838
4 8 14 0.6425 -2.7665
4 8 15 4.3171 8.4634
4 8 16 -0.1120 8.2894
4 8 17 2.1284 -1.3509
4 8 18 -2.8874 1.0046
4 8 19 -1.6203 -5.3280
4 8 20 -2.3723 -9.3952
4 8 21 -2.0315 2.9680
4 8 22 -0.1230 0.7437
4 8 23 -3.5302 2.5245
4 8 24 3.5559 4.2063
4 8 25 -0.2955 -3.5380
4 8 26 1.2130 -0.6234
4 8 27 1.9824 -3.0463
4 8 28 -3.0116 -2.0045
4 8 29 1.9850 3.2480
4 8 30 -0.1586 3.4741
4 8 31 0.5924 0.1269
4 8 32 0.7674 -0.5056
4 9 0 -6.9287 0.0156
4 9 1 -7.5250 -11.6155
4 9 2 6.7155 3.2459
4 9 3 -11.7337 0.4092
4 9 4 2.3621 -0.3188
4 9 5 10.8989 7.4316
4 9 6 -10.5164 -0.0030
4 9 7 6.4623 12.8305
4 9 8 0.0205 0.7721
4 9 9 -9.1037 -2.0833
4 9 10 6.7858 -1.2307
4 9 11 0.1117 -11.4507
4 9 12 1.9048 2.8741
4 9 13 6.6181 -1.9544
4 9 14 -4.0113 -2.3078
4 9 15 -1.0139 2.4249
4 9 16 0.6651 -1.4071
4 9 17 -5.9594 4.9552
4 9 18 -1.1664 3.6381
4 9 19 2.6456 0.7042
4 9 20 -0.7199 0.0513
4 9 21 1.7224 0.3899
4 9 22 0.3553 -2.6497
4 9 23 -3.0334 1.2713
4 9 24 2.3270 0.4253
4 9 25 -2.5901 -3.5088
4 9 26 -0.5465 2.4588
4 9 27 3.6854 -2.7759
4 9 28 -1.8621 -1.4265
4 9 29 1.0831 1.2423
4 9 30 1.5282 -0.1970
4 9 31 -0.5320 3.3678
4 9 32 -1.9026 0.4004
4 10 0 -3.1551 -0.0533
4 10 1 9.7004 3.8101
4 10 2 -2.2026 10.3313
4 10 3 10.1450 -2.2390
4 10 4 0.1575 5.1775
4 10 5 1.8119 -6.5666
4 10 6 6.6755 -13.2874
4 10 7 -1.0342 3.4857
4 10 8 1.8703 0.8218
4 10 9 -9.2996 3.4557
4 10 10 -3.9259 5.5358
4 10 11 -1.9895 -2.4029
4 10 12 -2.9153 -2.9761
4 10 13 5.3871 -1.6432
4 10 14 -0.4129 -3.9254
4 10 15 4.3577 2.4559
4 10 16 3.3631 7.1503
4 10 17 1.0772 0.8328
4 10 18 0.4068 2.5702
4 10 19 -2.5663 0.7759
4 10 20 0.1779 -7.6842
4 10 21 -0.7147 -1.1756
4 10 22 -0.5301 0.9754
4 10 23 -3.3466 0.0531
4 10 24 0.1886 3.9735
4 10 25 0.4520 -1.0849
4 10 26 -1.7569 -0.3501
4 10 27 2.0585 -0.7059
4 10 28 -1.0587 -3.5909
4 10 29 0.9691 0.2423
4 10 30 1.5359 3.1299
4 10 31 -0.1034 -0.0133
4 11 0 2.5825 0.3356
4 11 1 -11.3942 -6.0172
4 11 2 3.9060 -6.6747
4 11 3 -6.3519 0.7186
4 11 4 -6.7208 -6.2389
4 11 5 12.2583 2.0064
4 11 6 -2.9660 -2.5997
4 11 7 2.9137 6.4921
4 11 8 3.7297 8.1568
4 11 9 -11.3262 1.9513
4 11 10 0.2244 6.5258
4 11 11 -0.1445 -9.4858
4 11 12 0.0256 -3.0175
4 11 13 10.6818 -0.3559
4 11 14 1.3412 -7.2371
4 11 15 -3.3889 2.8355
4 11 16 3.0444 -0.9432
4 11 17 -5.3145 1.3525
4 11 18 -4.6840 3.7840
4 11 19 3.0252 0.2689
4 11 20 -0.6118 1.3581
4 11 21 2.5255 1.2486
4 11 22 2.8043 -1.2254
4 11 23 -4.0546 0.1036
4 11 24 -0.1460 2.4952
4 11 25 -1.0838 -1.1936
4 11 26 -2.8083 1.2862
4 11 27 3.2739 -0.3355
4 11 28 0.1559 -4.1040
4 11 29 -1.2692 -1.3524
4 11 30 1.5046 0.1518
4 11 31 0.4896 3.4565
4 12 0 -10.7790 -0.0242
4 12 1 1.1835 -1.1647
4 12 2 -2.8712 5.6971
4 12 3 1.6370 -0.0214
4 12 4 3.0064 1.4955
4 12 5 -0.3736 2.1245
4 12 6 6.5926 -5.8865
4 12 7 2.4052 -1.7197
4 12 8 6.7819 0.2016
4 12 9 -2.5426 2.6728
4 12 10 -5.4034 1.6839
4 12 11 -2.2900 -1.6082
4 12 12 -8.9896 -1.3595
4 12 13 2.6105 -0.9925
4 12 14 0.8426 -2.4244
4 12 15 1.6187 -1.0872
4 12 16 5.0798 3.5380
4 12 17 -0.2184 1.1969
4 12 18 2.6376 2.0361
4 12 19 -1.1258 2.4928
4 12 20 -0.0745 -2.6129
4 12 21 2.2402 -1.8595
4 12 22 -0.4982 0.9078
4 12 23 -1.0290 0.0462
4 12 24 -0.2943 1.3047
4 12 25 0.0071 0.2898
4 12 26 -2.5990 -1.2702
4 12 27 -0.9714 1.0205
4 12 28 0.1596 -0.3844
4 12 29 0.6629 -1.6663
4 12 30 1.2060 0.7338
4 12 31 0.6925 0.0405
4 13 0 10.1848 0.0631
4 13 1 -5.1335 4.2223
4 13 2 -3.1572 -4.8275
4 13 3 -0.2837 -3.2264
4 13 4 -7.8547 -5.1405
4 13 5 4.5907 -2.5832
4 13 6 5.0925 -5.3744
4 13 7 2.2508 -0.5596
4 13 8 4.5342 6.7792
4 13 9 -7.0072 2.1194
4 13 10 -5.0472 11.5037
4 13 11 -2.3510 -0.1581
4 13 12 -3.6702 -5.7158
4 13 13 6.3844 0.5993
4 13 14 6.7856 -8.3374
4 13 15 -1.6056 -0.1383
4 13 16 3.4405 0.4908
4 13 17 -0.9224 -1.6668
4 13 18 -6.4871 1.8253
4 13 19 1.4843 -1.3197
4 13 20 -0.8830 1.0977
4 13 21 1.6367 1.8619
4 13 22 5.2826 -0.9334
4 13 23 -2.1681 -0.1844
4 13 24 -2.8128 2.2773
4 13 25 -0.1931 1.3471
4 13 26 -1.9077 1.1928
4 13 27 0.3384 1.4044
4 13 28 1.5468 -2.2751
4 13 29 -1.0138 -2.8577
4 13 30 0.1505 -1.6013
4 14 0 -2.8362 -0.0130
4 14 1 -5.1452 -2.0158
4 14 2 -2.6110 -0.3483
4 14 3 -4.0267 1.9856
4 14 4 -1.0676 -3.2657
4 14 5 -0.7998 0.1364
4 14 6 4.2797 2.3829
4 14 7 1.3877 -0.1955
4 14 8 7.6105 -0.6843
4 14 9 4.7888 3.3622
4 14 10 -3.6680 0.1923
4 14 11 0.5583 -2.3848
4 14 12 -8.8611 0.5779
4 14 13 -2.8049 -1.3460
4 14 14 0.6106 -0.6885
4 14 15 -1.9075 -1.2209
4 14 16 3.6986 -0.9548
4 14 17 -1.8129 0.2351
4 14 18 2.2558 1.3641
4 14 19 1.7899 0.5157
4 14 20 -2.0252 -0.1206
4 14 21 3.4590 0.9968
4 14 22 1.3455 0.9534
4 14 23 0.1386 1.2361
4 14 24 1.7969 -0.5327
4 14 25 -0.1518 -0.2341
4 14 26 -2.2554 -1.5199
4 14 27 -1.6326 -0.4131
4 14 28 0.0592 2.5994
4 14 29 0.2832 0.2356
4 15 0 4.5904 -0.0290
4 15 1 4.1235 6.0358
4 15 2 -3.9356 3.6396
4 15 3 -0.5649 -2.2247
4 15 4 -2.7748 -3.2554
4 15 5 -2.9324 -2.8341
4 15 6 4.4455 -6.3160
4 15 7 3.9887 -6.1068
4 15 8 4.3832 3.1912
4 15 9 -1.0265 -0.6374
4 15 10 -3.4515 8.0333
4 15 11 -2.8693 8.4248
4 15 12 -4.4501 -3.0830
4 15 13 -0.7724 1.8321
4 15 14 3.6289 -4.1080
4 15 15 1.3417 -1.9442
4 15 16 2.2969 0.9304
4 15 17 2.2802 -2.2550
4 15 18 -4.0432 0.0714
4 15 19 0.3986 -2.6274
4 15 20 0.0319 -1.2195
4 15 21 -0.8550 0.4699
4 15 22 4.7291 -1.3110
4 15 23 0.4002 -0.1922
4 15 24 -3.1183 1.7832
4 15 25 -0.5067 1.9855
4 15 26 0.3470 0.3101
4 15 27 -1.1036 1.2354
4 15 28 0.3252 -0.0590
4 15 29 0.2005 -0.9780
4 16 0 3.4981 -0.0305
4 16 1 -2.4888 0.9483
4 16 2 -0.9683 -4.9040
4 16 3 -4.3611 1.2680
4 16 4 -4.1031 -0.5495
4 16 5 -3.8714 -4.6396
4 16 6 1.1208 1.1892
4 16 7 0.7944 3.3311
4 16 8 3.9394 -0.8046
4 16 9 8.4729 1.6080
4 16 10 -0.8977 1.4857
4 16 11 2.3685 -3.7114
4 16 12 -2.3657 2.0477
4 16 13 -3.8592 0.1762
4 16 14 0.7448 -0.6300
4 16 15 -3.9859 2.5029
4 16 16 0.6941 -2.4217
4 16 17 -3.1614 -2.7142
4 16 18 -1.0168 0.3255
4 16 19 2.6002 -1.6363
4 16 20 -3.1165 -1.4804
4 16 21 1.1663 3.5703
4 16 22 2.8151 2.3771
4 16 23 1.0783 1.5513
4 16 24 2.6271 0.0297
4 16 25 0.5396 -1.8898
4 16 26 -1.9872 -0.5990
4 16 27 -1.3982 -1.7200
4 16 28 1.2784 1.5627
4 17 0 -6.5958 0.0586
4 17 1 3.2458 2.8453
4 17 2 1.7406 5.7421
4 17 3 -2.1539 1.6926
4 17 4 1.4084 1.0257
4 17 5 -3.3569 -1.6233
4 17 6 -1.2550 -4.1026
4 17 7 1.4879 -7.8790
4 17 8 3.2724 -1.5987
4 17 9 2.2611 -1.4735
4 17 10 0.1489 0.0578
4 17 11 -0.4071 8.3412
4 17 12 -2.0898 0.4830
4 17 13 -1.8721 1.8539
4 17 14 -1.5006 1.1196
4 17 15 0.6480 -0.3083
4 17 16 0.9695 1.3786
4 17 17 1.1760 -0.5521
4 17 18 -1.1366 1.0357
4 17 19 0.4332 -1.9448
4 17 20 2.6565 -1.6456
4 17 21 -1.6057 -2.3850
4 17 22 1.4065 -2.7946
4 17 23 1.1032 0.2349
4 17 24 -1.6784 0.5335
4 17 25 -0.4014 2.2211
4 17 26 1.0864 -0.1890
4 17 27 0.3634 -0.7487
4 18 0 3.9165 -0.0317
4 18 1 -0.3401 4.5055
4 18 2 2.3846 -4.0389
4 18 3 -1.8897 -3.0859
4 18 4 -4.2033 3.3141
4 18 5 -4.3426 -2.3079
4 18 6 -4.0059 -3.2098
4 18 7 -0.2602 2.1433
4 18 8 0.3570 1.2288
4 18 9 6.1424 -1.0733
4 18 10 1.4759 2.4200
4 18 11 1.2354 -3.0634
4 18 12 2.8718 -0.9695
4 18 13 -0.8953 1.7871
4 18 14 2.9227 -2.0134
4 18 15 -2.5012 4.7037
4 18 16 -0.1566 2.5584
4 18 17 -2.0935 -3.9397
4 18 18 -3.5377 -1.8834
4 18 19 1.0976 -2.2566
4 18 20 -3.3222 -3.7300
4 18 21 -1.2345 2.5023
4 18 22 1.3504 4.1989
4 18 23 0.9425 0.9214
4 18 24 2.0200 1.7851
4 18 25 0.4898 -2.4805
4 18 26 -0.7618 -0.5433
4 19 0 -8.1546 0.0165
4 19 1 -5.0710 -0.6028
4 19 2 4.2634 5.3703
4 19 3 -1.7730 2.4775
4 19 4 2.8284 4.1046
4 19 5 0.6447 2.0588
4 19 6 -3.8967 -1.5078
4 19 7 -2.1041 -4.3104
4 19 8 -0.5585 -4.3368
4 19 9 2.3202 -1.2762
4 19 10 2.1536 -4.3923
4 19 11 0.8250 1.6839
4 19 12 -0.5467 0.9025
4 19 13 0.1896 0.3205
4 19 14 -1.2107 2.2322
4 19 15 -1.0325 1.0977
4 19 16 0.0660 1.9532
4 19 17 -0.9949 0.0754
4 19 18 -0.6237 3.8175
4 19 19 0.1248 0.1691
4 19 20 4.1265 -0.1194
4 19 21 0.6341 -1.6114
4 19 22 -1.3978 -4.5907
4 19 23 0.1731 1.1950
4 19 24 -0.5940 -0.0304
4 19 25 0.7727 0.4849
4 20 0 5.0470 0.0031
4 20 1 1.6493 4.6364
4 20 2 2.3981 0.3634
4 20 3 3.6267 -4.8606
4 20 4 -2.9926 2.7551
4 20 5 -2.4880 1.8004
4 20 6 -4.3508 -1.8969
4 20 7 -3.3333 -1.3875
4 20 8 -1.8416 0.6600
4 20 9 0.8243 -1.0581
4 20 10 1.2125 2.0540
4 20 11 -0.8115 0.6321
4 20 12 3.0322 -3.5266
4 20 13 0.6729 0.5160
4 20 14 4.4545 -2.8737
4 20 15 0.3688 0.8297
4 20 16 0.8453 7.2689
4 20 17 1.8395 -0.4820
4 20 18 -3.7436 -3.5244
4 20 19 0.2190 -1.7949
4 20 20 -2.6361 -3.6281
4 20 21 -1.6459 -0.9595
4 20 22 0.9030 3.7201
4 20 23 -0.4768 0.1674
4 20 24 0.2890 2.0789
4 21 0 -0.2353 0.0152
4 21 1 -8.6010 -5.0353
4 21 2 1.7968 2.6417
4 21 3 -1.7316 3.5250
4 21 4 1.8750 1.7914
4 21 5 5.0308 5.0943
4 21 6 -3.1039 1.7429
4 21 7 -2.2373 0.5655
4 21 8 -3.0098 -1.9057
4 21 9 -1.6211 -0.2638
4 21 10 2.9642 -3.0458
4 21 11 1.5533 -3.6125
4 21 12 -1.0655 -1.1881
4 21 13 0.5789 -1.6633
4 21 14 1.1460 0.2784
4 21 15 -1.1678 -0.7382
4 21 16 -0.9262 2.2062
4 21 17 -1.7006 -0.6783
4 21 18 -1.0395 3.9930
4 21 19 -0.1534 3.0186
4 21 20 2.5444 -0.5106
4 21 21 2.9321 1.0520
4 21 22 -1.8433 -3.9860
4 21 23 -0.8325 0.5787
4 22 0 1.3761 0.0404
4 22 1 5.0522 1.7567
4 22 2 -0.4628 2.0450
4 22 3 6.1462 -2.7553
4 22 4 1.8228 1.2080
4 22 5 -0.9083 1.8996
4 22 6 0.4346 1.8609
4 22 7 -3.0068 -0.3910
4 22 8 -2.5398 -1.8664
4 22 9 -3.0852 -1.3287
4 22 10 -0.9921 1.0899
4 22 11 -2.4016 3.1824
4 22 12 0.1843 -1.8223
4 22 13 -0.7308 -0.7808
4 22 14 2.5779 -1.2540
4 22 15 2.5653 -3.7881
4 22 16 0.6938 5.1360
4 22 17 5.5842 3.5776
4 22 18 -1.6698 -2.8706
4 22 19 -0.8006 -1.2904
4 22 20 -1.1803 -1.3029
4 22 21 -1.9707 -2.4838
4 22 22 1.8001 0.7069
4 23 0 5.8642 -0.0530
4 23 1 -4.4025 -5.0249
4 23 2 -0.4747 -2.8986
4 23 3 -1.9337 2.6973
4 23 4 -1.3671 -1.8167
4 23 5 6.2167 2.3147
4 23 6 0.2245 2.8277
4 23 7 -0.7534 3.4976
4 23 8 -0.7525 2.3730
4 23 9 -4.8354 1.4330
4 23 10 -0.3454 1.7687
4 23 11 2.5973 -3.0181
4 23 12 -1.0172 -1.6712
4 23 13 0.1397 -2.8631
4 23 14 2.3738 -1.6306
4 23 15 -0.2920 -3.5460
4 23 16 -1.7081 -0.0702
4 23 17 -2.0055 0.0206
4 23 18 -1.5708 1.5220
4 23 19 0.5712 4.6626
4 23 20 0.0703 -0.5601
4 24 0 -3.6728 0.0327
4 24 1 4.1856 -0.1989
4 24 2 -1.9813 -0.0663
4 24 3 2.1277 -1.0251
4 24 4 3.9132 0.8905
4 24 5 0.6814 -0.1846
4 24 6 4.4306 2.6736
4 24 7 0.9087 2.0880
4 24 8 0.1834 -0.9463
4 24 9 -2.7049 -1.5298
4 24 10 -2.3091 -0.7896
4 24 11 -2.2437 2.6678
4 24 12 -2.2780 0.6167
4 24 13 -2.2424 -0.8328
4 24 14 -2.1451 1.1237
4 24 15 2.6543 -2.9312
4 24 16 0.0449 -0.0195
4 24 17 4.9423 3.6217
4 24 18 2.2374 -0.8547
4 24 19 -1.0260 -0.9175
4 25 0 4.6766 -0.0004
4 25 1 1.1332 -1.5264
4 25 2 -0.1740 -2.9876
4 25 3 -0.6108 0.6550
4 25 4 -3.3400 -3.2564
4 25 5 1.8802 -1.7011
4 25 6 2.6570 -0.9044
4 25 7 1.2021 1.6050
4 25 8 1.8426 4.0582
4 25 9 -1.5743 1.5889
4 25 10 -3.9059 4.7122
4 25 11 0.6353 0.8481
4 25 12 -0.4288 1.0451
4 25 13 0.0793 -1.3201
4 25 14 2.5215 -2.2152
4 25 15 0.4867 -3.0096
4 25 16 -0.8426 -4.0806
4 25 17 -1.8756 -0.1244
4 26 0 -4.2003 -0.0293
4 26 1 2.0044 0.1711
4 26 2 -1.3361 -1.7052
4 26 3 -1.2073 -1.4865
4 26 4 1.2271 0.9967
4 26 5 -0.8015 -1.6766
4 26 6 3.8892 1.7525
4 26 7 3.0702 1.7134
4 26 8 2.9359 0.1529
4 26 9 0.9091 0.8787
4 26 10 -1.2717 -2.1126
4 26 11 -0.6468 0.2980
4 26 12 -2.0909 1.7709
4 26 13 -0.9262 -0.1282
4 26 14 -4.7350 1.0092
4 26 15 -0.1651 0.9066
4 27 0 -0.0579 0.1144
4 27 1 2.9018 -0.4722
4 27 2 0.7802 -1.5287
4 27 3 1.3962 1.5780
4 27 4 -1.1107 -1.4279
4 27 5 -2.6864 -1.8288
4 27 6 0.4359 -2.9770
4 27 7 2.4227 -2.6696
4 27 8 1.1107 1.3204
4 27 9 2.8993 0.4452
4 27 10 -1.5160 3.3314
4 27 11 -1.6412 1.6789
4 27 12 -0.8568 2.8187
4 27 13 -0.3611 1.9148
4 28 0 -5.0267 -0.0432
4 28 1 0.0012 0.6046
4 28 2 0.5109 -0.8916
4 28 3 -1.6215 -1.8978
4 28 4 0.7643 0.4772
4 28 5 -2.1304 -1.9126
4 28 6 -0.6734 0.8129
4 28 7 2.2226 1.0456
4 28 8 2.8201 -1.3015
4 28 9 2.1888 2.6513
4 29 0 -3.6220 0.0144
4 29 1 1.6092 0.7478
4 29 2 0.6614 -2.8960
4 29 3 1.6265 0.7627
4 29 4 2.4922 1.9131
5 0 1 1.3760 -15.3342
5 0 2 1.6423 0.2759
5 0 3 1.1388 -20.4523
5 0 4 -14.3777 -0.1755
5 0 5 -1.8131 4.5174
5 0 6 -6.4205 -0.2267
5 0 7 -0.8643 6.4805
5 0 8 9.4114 0.2423
5 0 9 1.9869 -2.0486
5 0 10 10.2379 0.1186
5 0 11 0.4491 8.2166
5 0 12 -3.8807 -0.2287
5 0 13 -1.9707 7.5786
5 0 14 -3.4349 -0.0303
5 0 15 0.0381 -16.1494
5 0 16 -2.6651 0.2127
5 0 17 1.7831 -6.3744
5 0 18 -0.3619 -0.0490
5 0 19 -0.5297 11.8213
5 0 20 -2.0214 -0.1587
5 0 21 -1.3550 -1.1900
5 0 22 1.6660 0.0473
5 0 23 0.6976 -2.8692
5 0 24 6.8075 0.1455
5 0 25 0.9928 5.2895
5 0 26 -1.3488 -0.0458
5 0 27 -0.7690 -0.9588
5 0 28 -1.1684 -0.1219
5 0 29 -0.5839 -3.9389
5 0 30 -3.6753 0.0773
5 0 31 0.7056 -0.4242
5 0 32 -0.8907 0.0726
5 1 0 0.0419 10.8563
5 1 1 -11.4290 3.0594
5 1 2 -2.7389 6.7793
5 1 3 -1.0860 8.5795
5 1 4 -8.3225 -7.4799
5 1 5 11.3522 1.8118
5 1 6 -0.2458 -7.7140
5 1 7 7.2354 -4.6645
5 1 8 4.5243 -0.0509
5 1 9 0.3364 -3.4587
5 1 10 5.7961 1.8551
5 1 11 -2.4101 1.1481
5 1 12 -1.1460 -0.1633
5 1 13 -10.9317 0.2381
5 1 14 -3.7593 4.4965
5 1 15 -1.4309 0.6740
5 1 16 -2.4236 3.7485
5 1 17 13.6847 3.0649
5 1 18 2.0326 -7.3920
5 1 19 -3.9675 -1.3935
5 1 20 0.4194 -1.5747
5 1 21 -5.2635 0.2975
5 1 22 -1.2866 -0.1289
5 1 23 8.1609 -1.6570
5 1 24 2.6601 -0.0998
5 1 25 -0.9106 -1.4733
5 1 26 0.4556 0.6340
5 1 27 -7.2281 0.9010
5 1 28 -1.4843 4.3819
5 1 29 2.4913 0.9985
5 1 30 -0.4813 1.7691
5 1 31 2.5848 1.3869
5 1 32 -0.4292 -7.1029
5 2 0 -1.2661 16.2208
5 2 1 3.6652 -10.1741
5 2 2 0.9857 7.1191
5 2 3 9.3124 -10.6813
5 2 4 -4.9089 -13.0362
5 2 5 -7.1113 3.1894
5 2 6 -3.9408 -5.4663
5 2 7 -14.0438 3.8402
5 2 8 2.0326 -0.1720
5 2 9 1.0193 -3.4448
5 2 10 4.7892 -2.2253
5 2 11 11.9194 4.9644
5 2 12 1.3307 5.1001
5 2 13 0.5404 6.8888
5 2 14 -2.1828 7.1988
5 2 15 -3.1435 -11.9721
5 2 16 -4.0570 -0.8836
5 2 17 -1.5945 -2.2952
5 2 18 0.4205 -8.4697
5 2 19 1.9276 8.4370
5 2 20 1.6722 0.2694
5 2 21 -3.6706 -2.7350
5 2 22 -0.2633 0.9987
5 2 23 -4.1498 -2.3537
5 2 24 1.3839 0.4758
5 2 25 6.8117 4.3863
5 2 26 1.3699 1.1454
5 2 27 1.5601 -1.3124
5 2 28 0.2574 0.6007
5 2 29 -1.7563 -2.7223
5 2 30 -4.1615 0.2065
5 2 31 -1.3120 0.4528
5 2 32 -0.6410 -1.7360
5 3 0 0.0419 -1.6338
5 3 1 -4.4185 6.9577
5 3 2 -6.2683 0.1577
5 3 3 4.2045 13.8952
5 3 4 -15.2732 2.1038
5 3 5 1.9925 3.3059
5 3 6 -0.8893 -0.9534
5 3 7 -2.9676 -6.4518
5 3 8 8.5049 0.8535
5 3 9 -1.5974 -6.3625
5 3 10 10.4962 -0.4566
5 3 11 7.3045 0.5252
5 3 12 -0.9290 -2.6465
5 3 13 -5.1622 0.1939
5 3 14 -7.5819 1.6233
5 3 15 -3.0883 4.0136
5 3 16 -4.8597 2.1244
5 3 17 7.3203 5.5339
5 3 18 4.5729 -1.9246
5 3 19 -2.9792 -5.2258
5 3 20 -0.1241 -1.9703
5 3 21 -4.4203 0.0744
5 3 22 -2.1418 2.4479
5 3 23 4.1721 -0.7888
5 3 24 5.6598 -0.2456
5 3 25 1.3288 -3.1736
5 3 26 -0.1734 -1.6530
5 3 27 -3.3684 0.2570
5 3 28 -2.9548 2.0135
5 3 29 1.3013 3.5044
5 3 30 -0.4974 1.6840
5 3 31 2.0152 3.5387
5 3 32 -0.5111 -3.1562
5 4 0 -0.5176 17.2616
5 4 1 2.1404 1.6928
5 4 2 0.5863 6.1859
5 4 3 7.6336 5.6383
5 4 4 6.6972 -12.1997
5 4 5 -2.6867 0.6213
5 4 6 2.4804 -5.5960
5 4 7 -13.5202 0.5804
5 4 8 -5.6239 0.1693
5 4 9 -1.0667 -5.7902
5 4 10 -7.6152 -2.7961
5 4 11 10.4801 -2.0897
5 4 12 5.9280 4.2596
5 4 13 3.2904 4.9847
5 4 14 4.3432 8.2409
5 4 15 -2.8478 -2.4168
5 4 16 -3.4419 -1.9925
5 4 17 -5.2842 3.1852
5 4 18 -2.0777 -7.2869
5 4 19 0.9591 3.1080
5 4 20 5.4033 0.8090
5 4 21 -0.1019 -4.7547
5 4 22 -1.0071 -0.4654
5 4 23 -3.2139 -3.1560
5 4 24 -5.6175 1.6576
5 4 25 4.4340 3.2481
5 4 26 2.8052 1.5775
5 4 27 2.5459 -0.2848
5 4 28 2.4332 -1.3407
5 4 29 -1.1968 -1.0957
5 4 30 -1.4415 0.3821
5 4 31 -2.8990 1.2991
5 4 32 -1.6911 -1.7169
5 5 0 0.0922 -12.2476
5 5 1 3.6445 0.9157
5 5 2 -5.4261 -3.4200
5 5 3 6.0436 3.0033
5 5 4 -8.1315 8.0157
5 5 5 -4.3135 6.1572
5 5 6 0.7191 2.0656
5 5 7 -12.7082 -2.6500
5 5 8 4.8010 3.4554
5 5 9 -2.7384 -6.1738
5 5 10 2.7602 -0.1866
5 5 11 13.9553 2.8044
5 5 12 1.4151 -6.1227
5 5 13 1.5370 0.6383
5 5 14 -3.0408 -2.6313
5 5 15 -5.1154 2.1059
5 5 16 -3.5975 3.2127
5 5 17 1.0386 3.0203
5 5 18 3.0124 4.3573
5 5 19 -0.2177 -3.5823
5 5 20 -0.3614 -2.8706
5 5 21 -5.3168 -1.5917
5 5 22 -1.7202 1.6137
5 5 23 0.8048 0.2102
5 5 24 3.4263 0.6646
5 5 25 4.8988 -1.5827
5 5 26 -1.2774 -1.9673
5 5 27 -0.4303 1.1717
5 5 28 -1.1082 -2.4269
5 5 29 -1.5827 2.3463
5 5 30 -0.1250 2.3225
5 5 31 1.4964 1.8198
5 5 32 0.1104 2.7159
5 6 0 0.0446 2.2472
5 6 1 -2.8734 10.4726
5 6 2 -1.7711 1.9512
5 6 3 2.8044 11.7332
5 6 4 7.0279 -1.7108
5 6 5 4.2163 0.0808
5 6 6 9.1945 -3.0550
5 6 7 -4.9122 -1.3372
5 6 8 -5.5299 2.4828
5 6 9 1.0317 -6.8533
5 6 10 -14.0253 -0.8055
5 6 11 0.9821 -4.1469
5 6 12 5.2913 -1.7847
5 6 13 0.2648 2.7668
5 6 14 9.2437 2.8501
5 6 15 1.4035 3.6095
5 6 16 -1.4199 -0.1719
5 6 17 -3.7498 3.0389
5 6 18 -4.1350 -1.5633
5 6 19 -2.4704 1.6513
5 6 20 4.1605 2.2231
5 6 21 3.1303 -4.4046
5 6 22 -1.7050 -1.3891
5 6 23 0.2661 -4.9694
5 6 24 -5.9926 0.0735
5 6 25 0.5722 2.9648
5 6 26 2.6419 0.7027
5 6 27 1.2076 2.5918
5 6 28 3.4355 -2.0973
5 6 29 -1.7877 -1.3744
5 6 30 0.3866 0.7643
5 6 31 -0.5737 0.3088
5 7 0 -0.0006 -4.4613
5 7 1 6.8850 -8.6216
5 7 2 0.6845 -1.9716
5 7 3 2.4348 -9.0311
5 7 4 1.4159 -0.7385
5 7 5 -4.4579 8.4129
5 7 6 4.4475 1.8946
5 7 7 -13.1294 -0.1133
5 7 8 -3.0947 7.1459
5 7 9 0.5829 -4.8499
5 7 10 -7.1504 -1.9530
5 7 11 10.8503 6.5823
5 7 12 3.4096 -6.1230
5 7 13 2.0754 1.0605
5 7 14 5.1684 -1.3348
5 7 15 -4.5529 -3.8533
5 7 16 -2.1502 3.4992
5 7 17 0.0947 -0.2322
5 7 18 -1.0397 3.7559
5 7 19 0.9373 1.7101
5 7 20 1.9832 -0.5902
5 7 21 -5.1364 -0.9542
5 7 22 -2.5275 0.7016
5 7 23 0.3369 -1.2888
5 7 24 -1.2228 -0.8719
5 7 25 5.0092 -0.0845
5 7 26 -0.0639 -2.5778
5 7 27 0.0487 3.3464
5 7 28 2.4348 -1.6443
5 7 29 -3.3104 -1.0991
5 7 30 -1.4002 2.8628
5 7 31 0.7942 -0.8687
5 8 0 -0.0906 -14.8291
5 8 1 -4.5228 7.4853
5 8 2 -8.1554 -0.1841
5 8 3 -0.9020 6.4142
5 8 4 0.1693 6.7242
5 8 5 3.3836 1.8718
5 8 6 11.9512 1.5592
5 8 7 3.6919 -2.9025
5 8 8 -1.9953 3.8587
5 8 9 3.9613 -5.1678
5 8 10 -9.6781 -1.4637
5 8 11 -6.4503 -0.0214
5 8 12 2.7927 -5.5580
5 8 13 -3.5647 1.5367
5 8 14 6.5490 -1.7329
5 8 15 5.6131 1.7146
5 8 16 -0.0383 3.4523
5 8 17 -0.5192 0.3088
5 8 18 -2.2606 0.8479
5 8 19 -3.4347 2.2272
5 8 20 1.1861 3.2021
5 8 21 4.2647 -1.7351
5 8 22 -2.1969 -0.7193
5 8 23 0.6193 -3.4992
5 8 24 -3.8333 -2.7009
5 8 25 -2.5704 1.2243
5 8 26 2.5198 -0.7019
5 8 27 0.3307 3.4597
5 8 28 3.7112 0.1308
5 8 29 0.0500 -1.2449
5 8 30 -1.5338 1.2704
5 8 31 -0.0102 -1.1674
5 9 0 -0.0885 12.7906
5 9 1 2.2532 -7.9088
5 9 2 6.7228 0.5054
5 9 3 -0.1102 -7.0130
5 9 4 6.0321 -13.2231
5 9 5 -1.5602 3.4493
5 9 6 5.3586 1.5058
5 9 7 -3.6936 -0.6435
5 9 8 -10.0221 8.5459
5 9 9 2.4420 -0.5017
5 9 10 -8.7566 -4.5670
5 9 11 2.1695 4.8661
5 9 12 4.6904 -3.7518
5 9 13 -1.2229 -0.2339
5 9 14 8.6879 3.1958
5 9 15 -0.8357 -5.4965
5 9 16 -2.0309 1.9165
5 9 17 2.8109 -1.0998
5 9 18 -3.1924 -1.7956
5 9 19 -1.1103 2.9043
5 9 20 3.2541 1.3954
5 9 21 -2.5003 1.1063
5 9 22 -2.3690 2.9225
5 9 23 1.1397 -0.4148
5 9 24 -2.9855 -1.9424
5 9 25 1.3555 0.7086
5 9 26 0.4980 -3.9178
5 9 27 -0.4543 0.3995
5 9 28 4.3721 1.1632
5 9 29 -1.4317 -1.6079
5 9 30 -2.1706 1.9141
5 10 0 0.0457 -15.9312
5 10 1 0.1738 -3.5891
5 10 2 -9.7856 -1.2462
5 10 3 -3.2501 -2.4890
5 10 4 -4.1989 6.7281
5 10 5 -2.6086 1.7259
5 10 6 6.8512 5.7937
5 10 7 6.8760 -0.7953
5 10 8 2.2599 2.3011
5 10 9 2.8552 -0.0646
5 10 10 -1.9132 -3.4690
5 10 11 -6.4420 1.9705
5 10 12 -0.8692 -5.2874
5 10 13 -3.4610 0.9962
5 10 14 1.0960 -2.0411
5 10 15 4.8187 -3.7342
5 10 16 1.0755 5.2209
5 10 17 1.4830 -0.6609
5 10 18 -0.5492 0.1775
5 10 19 -1.2406 3.2735
5 10 20 -0.4191 1.3527
5 10 21 3.0720 0.6688
5 10 22 0.6767 0.5104
5 10 23 0.5786 -1.2234
5 10 24 -1.5975 -1.5729
5 10 25 -4.5630 -0.4175
5 10 26 -0.3097 -1.8440
5 10 27 -0.4991 1.6892
5 10 28 1.7082 0.9711
5 10 29 3.5163 0.0747
5 10 30 -0.1509 2.1832
5 11 0 0.0091 17.1195
5 11 1 -4.6436 0.9331
5 11 2 4.2225 0.8173
5 11 3 -0.1997 2.4374
5 11 4 5.2193 -13.1805
5 11 5 2.2905 -3.7956
5 11 6 2.1335 0.1379
5 11 7 7.1434 -1.3960
5 11 8 -7.4940 6.1553
5 11 9 -0.5550 3.3606
5 11 10 -4.8155 -2.6164
5 11 11 -4.6435 0.4230
5 11 12 2.6670 -2.5436
5 11 13 -3.8229 -1.8875
5 11 14 6.5204 5.0405
5 11 15 2.5126 -3.0763
5 11 16 -1.9143 0.6336
5 11 17 5.7356 0.1349
5 11 18 -1.8023 -5.8506
5 11 19 -2.9378 1.0861
5 11 20 2.4969 0.1762
5 11 21 -1.6439 -0.0200
5 11 22 -1.1377 4.2517
5 11 23 2.6340 1.5336
5 11 24 -1.6091 -0.3953
5 11 25 -0.4400 2.7108
5 11 26 -0.3819 -1.7380
5 11 27 -2.3364 -3.2727
5 11 28 2.5758 0.4644
5 11 29 1.1261 -0.8986
5 12 0 -0.0016 -1.3906
5 12 1 3.2038 -8.1005
5 12 2 -4.1750 -1.9745
5 12 3 -2.0771 -6.8509
5 12 4 -3.5677 1.2482
5 12 5 -4.0917 -1.6641
5 12 6 0.4093 3.7897
5 12 7 2.2200 2.9894
5 12 8 4.7313 -0.1138
5 12 9 0.6118 3.9970
5 12 10 0.7176 -1.1973
5 12 11 -0.7066 2.2987
5 12 12 -2.2947 -3.6524
5 12 13 -1.9878 0.3959
5 12 14 -1.4313 0.3310
5 12 15 0.1409 -8.0904
5 12 16 -0.8581 3.4624
5 12 17 2.7328 -0.1462
5 12 18 -0.1018 -2.3383
5 12 19 0.3029 4.8228
5 12 20 0.7011 -0.6115
5 12 21 -0.6658 -0.0449
5 12 22 2.6391 2.6833
5 12 23 2.4190 -1.2144
5 12 24 0.7358 -0.0241
5 12 25 -2.3858 1.3113
5 12 26 -2.1195 -1.3985
5 12 27 -1.5889 0.2250
5 12 28 -1.9082 -0.3539
5 12 29 2.4998 -0.1422
5 13 0 0.0172 7.0607
5 13 1 -4.9418 6.2784
5 13 2 -2.9309 0.5662
5 13 3 -1.6817 5.8629
5 13 4 0.6084 -4.7807
5 13 5 3.9577 -5.3058
5 13 6 -1.8472 -1.8419
5 13 7 9.1271 -1.7620
5 13 8 1.8518 3.5060
5 13 9 -1.1434 3.3999
5 13 10 -0.0901 0.7919
5 13 11 -5.3726 -1.1818
5 13 12 -0.5151 -2.0599
5 13 13 -5.6946 -2.6096
5 13 14 1.3819 4.4003
5 13 15 2.8547 0.8987
5 13 16 -2.3385 -0.2431
5 13 17 5.6214 2.0175
5 13 18 0.8285 -5.9132
5 13 19 -2.3886 -1.1048
5 13 20 2.6752 -0.7363
5 13 21 -1.3572 -3.0496
5 13 22 -1.8997 2.2228
5 13 23 3.3459 1.8572
5 13 24 0.6800 0.2699
5 13 25 0.1004 2.8287
5 13 26 0.7545 2.0336
5 13 27 -3.2020 -2.6103
5 13 28 -1.8060 0.1222
5 14 0 -0.0721 8.7009
5 14 1 1.3409 -1.9910
5 14 2 0.2606 -0.1629
5 14 3 1.0149 -4.9196
5 14 4 -1.8137 -2.2611
5 14 5 -2.0390 -3.8493
5 14 6 0.5113 -2.3940
5 14 7 -3.2667 3.6022
5 14 8 2.5555 -1.9721
5 14 9 0.8484 3.1439
5 14 10 -1.4391 1.1840
5 14 11 3.0687 3.0237
5 14 12 0.2737 0.0647
5 14 13 0.6992 -0.2871
5 14 14 -0.4275 3.6163
5 14 15 -2.3901 -7.0380
5 14 16 -4.1594 0.2091
5 14 17 0.5714 0.5893
5 14 18 0.1250 -5.3007
5 14 19 -0.3285 3.4896
5 14 20 2.1428 -0.5339
5 14 21 -2.1523 -2.4962
5 14 22 1.0010 3.4827
5 14 23 2.5890 -0.4096
5 14 24 1.3569 -1.1853
5 14 25 0.5141 2.8971
5 14 26 -0.5719 1.1017
5 14 27 0.0659 0.1970
5 14 28 -3.2416 -1.0316
5 15 0 -0.0316 -3.9203
5 15 1 -0.2289 4.0154
5 15 2 -4.7397 1.6143
5 15 3 -3.1607 3.9396
5 15 4 -4.9405 1.6207
5 15 5 2.7732 -1.8918
5 15 6 -2.8513 -2.2479
5 15 7 2.9104 -3.2608
5 15 8 6.4323 1.2273
5 15 9 0.1799 1.5103
5 15 10 4.0672 1.8330
5 15 11 -1.4018 -0.8841
5 15 12 -1.1148 -1.1453
5 15 13 -3.8413 -1.8557
5 15 14 -2.4925 0.8249
5 15 15 0.7105 4.2957
5 15 16 -2.5270 0.4631
5 15 17 2.2093 2.5133
5 15 18 -0.0838 -1.2170
5 15 19 -1.1627 -2.0840
5 15 20 2.7773 -1.0300
5 15 21 0.3599 -3.3929
5 15 22 -1.5396 -1.3266
5 15 23 1.4243 0.8093
5 15 24 2.4884 0.9527
5 15 25 0.7215 0.0984
5 15 26 1.5615 2.5383
5 15 27 -0.6620 -0.1114
5 16 0 0.0843 5.4427
5 16 1 -0.6319 3.5895
5 16 2 0.9057 4.0572
5 16 3 2.9703 -0.2069
5 16 4 -0.0350 -2.2338
5 16 5 -2.1786 -2.1714
5 16 6 2.3956 -7.0526
5 16 7 -3.3835 2.0847
5 16 8 -2.2425 -1.8508
5 16 9 1.6412 0.1066
5 16 10 -2.8506 1.5721
5 16 11 2.4347 -0.0914
5 16 12 1.9382 2.6260
5 16 13 3.1625 -0.1457
5 16 14 2.5304 3.8761
5 16 15 -1.5385 -1.4020
5 16 16 -3.1399 0.4253
5 16 17 -1.9741 1.8330
5 16 18 -0.6425 -5.7026
5 16 19 -1.0751 0.6050
5 16 20 1.2124 -0.8247
5 16 21 -1.0271 -3.8665
5 16 22 -0.2365 1.3445
5 16 23 0.6883 0.2844
5 16 24 -0.1122 -1.3199
5 16 25 1.3035 1.8186
5 16 26 0.2691 2.9282
5 17 0 0.0134 -6.8874
5 17 1 3.4833 -2.3474
5 17 2 -1.3598 1.1096
5 17 3 -1.4341 1.3115
5 17 4 -8.1259 3.8448
5 17 5 -0.9400 2.7200
5 17 6 -0.3042 0.7459
5 17 7 -2.8341 -3.2618
5 17 8 5.5193 -1.2446
5 17 9 -0.8365 -1.4001
5 17 10 3.3691 0.5937
5 17 11 3.2725 -0.4096
5 17 12 -1.2133 -1.2470
5 17 13 0.0188 1.3576
5 17 14 -0.5026 -2.8925
5 17 15 -0.9513 2.2219
5 17 16 -2.2748 1.9395
5 17 17 1.2194 0.5340
5 17 18 -3.2075 2.9813
5 17 19 -2.4290 0.5955
5 17 20 2.2609 -0.9250
5 17 21 -0.4793 -1.0414
5 17 22 0.9479 -2.1333
5 17 23 0.1225 -1.4994
5 17 24 1.9269 1.4017
5 17 25 2.1815 -0.8783
5 18 0 0.0025 -2.2667
5 18 1 -1.2546 2.6758
5 18 2 0.0897 5.7105
5 18 3 2.9924 4.9702
5 18 4 2.9646 -0.1427
5 18 5 -1.8092 1.3490
5 18 6 1.1203 -7.7033
5 18 7 -0.4615 -1.0220
5 18 8 -4.9695 0.1342
5 18 9 0.1072 -2.0887
5 18 10 -2.9687 3.2951
5 18 11 0.6957 -2.8100
5 18 12 1.4176 -0.1996
5 18 13 2.1655 0.2247
5 18 14 4.4580 1.1161
5 18 15 -0.0839 1.1635
5 18 16 -0.5249 2.3845
5 18 17 -1.4041 4.5944
5 18 18 -0.8606 -3.7789
5 18 19 -0.8170 -0.3222
5 18 20 0.4797 -0.1341
5 18 21 0.8195 -4.2363
5 18 22 -0.2430 -0.7049
5 18 23 -0.4704 -0.9543
5 18 24 -1.8113 -0.5741
5 19 0 0.0198 -0.8167
5 19 1 4.3474 -5.8376
5 19 2 3.4202 -1.9786
5 19 3 1.7520 -1.7374
5 19 4 -5.5895 1.4236
5 19 5 -5.1486 4.5001
5 19 6 0.9253 4.6796
5 19 7 -4.2880 0.2347
5 19 8 3.1487 -0.5437
5 19 9 -0.6121 -2.9478
5 19 10 -1.6933 -1.9356
5 19 11 4.4237 0.4486
5 19 12 -0.4961 -3.0337
5 19 13 0.1429 3.5367
5 19 14 2.9302 -1.2113
5 19 15 0.8983 -2.1760
5 19 16 -3.1168 1.4317
5 19 17 2.1031 -1.4393
5 19 18 -1.2127 1.3312
5 19 19 -5.3103 1.8594
5 19 20 1.4675 0.1580
5 19 21 -2.2058 0.9081
5 19 22 0.6451 0.3753
5 19 23 1.5300 -1.4126
5 20 0 -0.0592 -7.3404
5 20 1 -1.4261 -0.9872
5 20 2 -1.5515 2.0748
5 20 3 1.1448 5.6233
5 20 4 4.3470 3.6175
5 20 5 1.1933 4.2277
5 20 6 -0.3754 -3.3382
5 20 7 1.8442 -3.0814
5 20 8 -3.0167 0.8760
5 20 9 -1.1015 -3.0914
5 20 10 -3.0623 3.5078
5 20 11 -1.4390 -0.6469
5 20 12 0.5470 -3.2163
5 20 13 -0.7592 -0.6502
5 20 14 3.5034 -0.5646
5 20 15 1.2346 0.6137
5 20 16 0.6186 0.4935
5 20 17 -1.4392 5.6312
5 20 18 -0.8275 0.1847
5 20 19 -0.6323 -1.0444
5 20 20 0.0040 2.0564
5 20 21 3.5667 -3.0305
5 20 22 1.0251 -1.9961
5 21 0 -0.0011 7.0388
5 21 1 1.1429 -2.5074
5 21 2 6.5974 -3.7120
5 21 3 3.5504 -3.0483
5 21 4 0.2843 -3.4071
5 21 5 -3.3741 1.2826
5 21 6 -0.2810 4.9226
5 21 7 -2.9460 2.6291
5 21 8 0.2146 2.1747
5 21 9 0.4804 -0.3076
5 21 10 -4.5400 -3.3391
5 21 11 0.7277 1.7779
5 21 12 1.2488 -3.2821
5 21 13 -0.1567 1.2648
5 21 14 2.2381 2.5141
5 21 15 3.2928 -2.4212
5 21 16 -2.2517 0.4150
5 21 17 -0.1155 -1.1553
5 21 18 3.3611 -1.2922
5 21 19 -4.1156 -1.0986
5 21 20 -1.1855 -0.4145
5 21 21 -2.0140 0.8991
5 22 0 0.0124 -6.8519
5 22 1 -0.9659 -3.6177
5 22 2 -3.1342 -1.6536
5 22 3 -0.5604 -0.6173
5 22 4 2.3026 3.7419
5 22 5 2.7991 4.4700
5 22 6 -0.3163 1.3798
5 22 7 1.6679 -0.2985
5 22 8 0.6037 1.5363
5 22 9 0.5922 -2.1020
5 22 10 -0.6962 1.2905
5 22 11 -2.6108 0.9898
5 22 12 -0.3827 -2.9059
5 22 13 -2.6928 -1.2937
5 22 14 0.6708 -1.2557
5 22 15 1.2833 0.8172
5 22 16 1.9980 -1.3632
5 22 17 -1.7116 1.1883
5 22 18 -2.2167 3.7828
5 22 19 -0.5546 0.2240
5 22 20 -1.5818 2.0485
5 23 0 -0.0146 7.9371
5 23 1 -3.1332 3.1984
5 23 2 4.2438 -2.0325
5 23 3 2.7717 -0.9255
5 23 4 2.1596 -4.9828
5 23 5 1.8421 -3.1569
5 23 6 0.9009 1.5380
5 23 7 0.0455 1.3913
5 23 8 -0.2071 1.6798
5 23 9 0.4409 3.1164
5 23 10 -3.6494 -2.3784
5 23 11 -3.5883 1.8626
5 23 12 -0.1650 -0.1118
5 23 13 0.8277 -1.6756
5 23 14 1.0985 3.0648
5 23 15 2.4330 -0.2492
5 23 16 0.5426 0.8819
5 23 17 -1.1100 -0.0367
5 23 18 3.2008 -1.4526
5 24 0 -0.0353 -1.9674
5 24 1 -0.2015 -3.0618
5 24 2 -4.0908 -1.1961
5 24 3 -0.4134 -4.4397
5 24 4 -0.1463 -1.0761
5 24 5 1.3059 0.9609
5 24 6 0.6681 1.3430
5 24 7 -0.4541 1.5388
5 24 8 1.4191 3.1219
5 24 9 1.5296 0.8087
5 24 10 2.9467 0.6131
5 24 11 -0.4787 1.0929
5 24 12 -0.2662 -1.8825
5 24 13 -2.2266 -0.8032
5 24 14 -1.2940 -1.2436
5 24 15 -0.6480 -0.6309
5 24 16 1.7540 0.1568
5 25 0 -0.0272 2.4880
5 25 1 -3.0505 4.4649
5 25 2 0.2423 0.7257
5 25 3 0.0461 2.0261
5 25 4 0.2665 -2.1111
5 25 5 1.4990 -3.8124
5 25 6 1.8179 -1.9461
5 25 7 2.9222 -0.6089
5 25 8 1.3878 -1.0918
5 25 9 1.6353 2.7781
5 25 10 -0.3208 -0.2309
5 25 11 -3.4956 -0.2100
5 25 12 -2.8912 2.6993
5 25 13 -0.9854 -1.6396
5 25 14 0.3991 1.7429
5 26 0 -0.0435 0.3904
5 26 1 0.8197 -0.7831
5 26 2 -4.2158 0.3326
5 26 3 -0.0268 -1.6970
5 26 4 -0.8025 -2.1525
5 26 5 -1.2181 -3.1082
5 26 6 1.9743 -0.3285
5 26 7 -1.5797 -0.5437
5 26 8 0.1849 1.3940
5 26 9 -0.1653 2.5007
5 26 10 2.7894 0.7921
5 26 11 2.6566 1.3961
5 27 0 0.0188 -2.2303
5 27 1 -1.3373 1.0083
5 27 2 0.4009 1.7808
5 27 3 -1.3010 2.7878
5 27 4 -0.4130 1.3539
5 27 5 -0.7149 -0.7157
5 27 6 -1.4583 -3.0798
5 27 7 2.7564 -1.3962
5 27 8 1.1782 -1.9255
6 0 0 -9.3263 -0.6945
6 0 1 -1.1534 6.8342
6 0 2 -2.7741 0.0757
6 0 3 1.3802 6.5490
6 0 4 13.5405 0.7925
6 0 5 0.9480 -5.1334
6 0 6 -1.0378 -0.2714
6 0 7 -1.5298 -15.7939
6 0 8 -7.8003 -0.8207
6 0 9 -0.6486 -2.8369
6 0 10 4.8454 0.4954
6 0 11 1.6916 11.7899
6 0 12 1.8745 0.6506
6 0 13 0.1885 2.4352
6 0 14 -6.1032 -0.6686
6 0 15 -1.6138 -1.9490
6 0 16 -1.5079 -0.4109
6 0 17 0.1558 1.5562
6 0 18 7.3902 0.6812
6 0 19 1.3769 -2.5581
6 0 20 -3.0455 0.1981
6 0 21 -0.4465 -5.8040
6 0 22 -1.9828 -0.6378
6 0 23 -1.0331 0.8813
6 0 24 1.8660 -0.0097
6 0 25 0.5997 6.5734
6 0 26 1.2045 0.5152
6 0 27 0.6478 -1.0023
6 0 28 -2.5754 -0.1158
6 0 29 -0.5738 -0.6933
6 0 30 0.4100 -0.3755
6 1 0 5.7012 0.4318
6 1 1 -2.7342 -2.1817
6 1 2 2.8209 0.8680
6 1 3 -9.2749 3.1694
6 1 4 -0.3361 -5.9222
6 1 5 -9.7930 -0.4267
6 1 6 -6.2085 2.9759
6 1 7 2.5904 -3.4315
6 1 8 -4.4978 0.9365
6 1 9 11.6445 -0.5433
6 1 10 3.6685 3.1898
6 1 11 1.5885 3.7129
6 1 12 2.9043 0.7058
6 1 13 -4.4527 1.3960
6 1 14 0.9569 -3.3138
6 1 15 -0.1710 -1.9622
6 1 16 -0.4660 -2.5553
6 1 17 -3.1274 -2.5598
6 1 18 -1.9398 4.9486
6 1 19 -0.8807 2.8361
6 1 20 -0.5836 -0.0562
6 1 21 1.7364 0.6902
6 1 22 -0.2601 -4.7440
6 1 23 3.4071 -2.2610
6 1 24 0.1131 2.6234
6 1 25 -0.2851 0.3906
6 1 26 1.1137 2.0633
6 1 27 -0.7535 0.7042
6 1 28 1.1862 -1.1592
6 1 29 -1.0229 0.1019
6 1 30 -1.0682 -1.7117
6 2 0 -7.0716 -0.2732
6 2 1 -4.9666 3.4885
6 2 2 -2.8245 4.5842
6 2 3 -5.3355 2.9619
6 2 4 9.3227 8.4680
6 2 5 4.5292 -2.0628
6 2 6 0.5455 7.6316
6 2 7 2.6790 -7.1935
6 2 8 -6.2795 -9.0463
6 2 9 -1.7814 -3.4246
6 2 10 3.2180 -9.8968
6 2 11 0.3499 6.8263
6 2 12 2.5478 2.9027
6 2 13 3.2843 1.4579
6 2 14 -3.7487 4.6856
6 2 15 -3.1367 -1.6276
6 2 16 -2.4304 0.8270
6 2 17 -3.3244 1.1338
6 2 18 3.8678 0.9104
6 2 19 3.9871 -1.5209
6 2 20 -0.5387 1.2010
6 2 21 0.2779 -3.1856
6 2 22 -1.1423 -3.4793
6 2 23 -1.3537 1.2643
6 2 24 0.7711 -3.2647
6 2 25 -0.3204 3.6169
6 2 26 0.3362 2.0603
6 2 27 1.5909 -1.8222
6 2 28 -0.9683 2.4456
6 2 29 0.5360 0.2149
6 2 30 0.5740 0.9196
6 3 0 11.8681 0.3184
6 3 1 1.5451 -1.4367
6 3 2 5.1233 -4.9148
6 3 3 -1.3090 5.4070
6 3 4 -1.1348 -0.6694
6 3 5 -1.4161 -2.2870
6 3 6 -10.1465 5.0236
6 3 7 -0.2528 -7.2674
6 3 8 -9.9199 -2.5041
6 3 9 1.9790 0.5762
6 3 10 5.8776 -2.8526
6 3 11 -0.5815 5.8323
6 3 12 7.5679 4.5360
6 3 13 -2.6422 1.8308
6 3 14 1.5476 1.1856
6 3 15 3.1756 -2.2597
6 3 16 -2.0878 -3.0916
6 3 17 0.2384 -3.2734
6 3 18 -3.6944 -0.2521
6 3 19 -2.3808 4.2037
6 3 20 -0.8871 2.6503
6 3 21 0.8229 -0.1612
6 3 22 -0.0737 -2.4939
6 3 23 2.1079 -3.3010
6 3 24 0.5164 -0.6207
6 3 25 -2.2462 1.5200
6 3 26 1.6675 2.1557
6 3 27 -0.3095 0.7167
6 3 28 2.1935 -0.6240
6 3 29 1.8632 -0.5734
6 3 30 -1.7562 -1.7646
6 4 0 0.2753 0.0667
6 4 1 -6.0305 -3.4446
6 4 2 -0.9674 5.2152
6 4 3 -6.8035 -0.7802
6 4 4 -0.3615 6.3173
6 4 5 2.6150 1.8386
6 4 6 1.5766 8.2854
6 4 7 4.7525 5.8048
6 4 8 -2.0821 -5.9618
6 4 9 -0.8676 0.1713
6 4 10 1.0577 -12.5531
6 4 11 -1.3784 -2.6832
6 4 12 1.4536 2.5751
6 4 13 4.9368 -3.4166
6 4 14 0.1226 6.8508
6 4 15 -1.6117 0.2024
6 4 16 -0.8808 0.4544
6 4 17 -4.1964 2.1083
6 4 18 -0.9316 0.0848
6 4 19 1.2339 0.0453
6 4 20 -0.2429 0.6908
6 4 21 1.5716 0.6073
6 4 22 -0.3460 -3.9880
6 4 23 -0.0515 1.5895
6 4 24 2.1757 -2.1973
6 4 25 -0.9918 -1.5704
6 4 26 -1.2750 2.7607
6 4 27 0.2068 -2.4178
6 4 28 -0.3421 1.8697
6 4 29 1.9267 0.9861
6 4 30 1.2882 0.2887
6 5 0 4.1607 -0.2788
6 5 1 5.8954 1.7486
6 5 2 3.1592 -6.1345
6 5 3 6.5878 1.6801
6 5 4 1.3868 3.9335
6 5 5 4.1698 -2.6493
6 5 6 -5.0771 5.5970
6 5 7 -0.3768 -5.4819
6 5 8 -7.9956 -5.4028
6 5 9 -6.2474 2.3187
6 5 10 4.4849 -6.6585
6 5 11 -5.2393 0.6761
6 5 12 6.2597 5.5208
6 5 13 0.9892 1.2356
6 5 14 -1.9965 3.4197
6 5 15 6.6875 1.4077
6 5 16 -1.8995 -2.8720
6 5 17 2.5902 -1.3615
6 5 18 -0.2246 -2.0361
6 5 19 -4.1629 0.6159
6 5 20 -1.6327 5.1818
6 5 21 -0.2886 0.4770
6 5 22 -0.0278 -2.9597
6 5 23 0.3836 -1.4694
6 5 24 1.6837 -3.2030
6 5 25 -2.7182 0.1422
6 5 26 0.6614 3.4249
6 5 27 0.4154 0.6590
6 5 28 0.2744 0.0258
6 5 29 3.2075 -0.7789
6 5 30 -0.9246 -2.3831
6 6 0 6.1629 0.0136
6 6 1 -0.9234 -6.2019
6 6 2 0.8421 -1.7816
6 6 3 -2.1430 -2.4501
6 6 4 -5.3117 -0.2929
6 6 5 -4.5744 2.4725
6 6 6 -1.0156 4.4468
6 6 7 4.3415 10.5204
6 6 8 0.4020 -0.1797
6 6 9 2.6357 4.9406
6 6 10 0.5660 -4.8171
6 6 11 -2.9831 -8.8357
6 6 12 -0.5244 2.0630
6 6 13 2.2377 -6.2459
6 6 14 2.5231 2.7663
6 6 15 0.9374 2.4286
6 6 16 1.7899 -1.3828
6 6 17 -0.9386 2.4967
6 6 18 -1.6734 -0.0660
6 6 19 -1.1356 1.1802
6 6 20 -3.0039 0.0365
6 6 21 0.0585 2.8604
6 6 22 -0.4464 -1.9015
6 6 23 -0.3775 0.5129
6 6 24 4.6813 0.7590
6 6 25 1.1360 -5.4089
6 6 26 -1.7467 0.8518
6 6 27 -1.5344 -0.4572
6 6 28 -1.5313 1.0407
6 6 29 1.4701 1.6798
6 7 0 -9.1896 -0.0097
6 7 1 1.5878 2.1411
6 7 2 -1.0664 -3.0654
6 7 3 5.3956 -1.0801
6 7 4 6.6490 6.3553
6 7 5 7.1809 -1.6463
6 7 6 1.1165 4.1135
6 7 7 0.6130 -0.7272
6 7 8 -2.2505 -7.1778
6 7 9 -9.2739 2.8947
6 7 10 2.7395 -4.5677
6 7 11 -4.6923 -3.7344
6 7 12 0.0693 3.0367
6 7 13 4.3279 -0.4963
6 7 14 -5.2081 1.7786
6 7 15 4.5899 3.4484
6 7 16 -0.0254 -1.7299
6 7 17 1.9299 -0.1131
6 7 18 4.8802 -0.2276
6 7 19 -2.4906 -2.2742
6 7 20 -2.1238 4.4928
6 7 21 -0.4706 3.2216
6 7 22 -0.3371 -3.4269
6 7 23 -2.1605 -0.7364
6 7 24 0.8612 -2.8573
6 7 25 -1.9311 -2.1018
6 7 26 -0.0780 3.5047
6 7 27 2.3117 1.1237
6 7 28 -0.5324 0.7721
6 7 29 1.7058 -0.1985
6 8 0 2.0078 0.0538
6 8 1 5.0763 -0.2276
6 8 2 3.2068 -6.9377
6 8 3 3.2323 -4.7036
6 8 4 -1.1011 -6.3887
6 8 5 -6.4217 -0.9010
6 8 6 -6.8646 0.5818
6 8 7 0.7988 8.1432
6 8 8 -0.3202 4.1834
6 8 9 3.3935 4.0328
6 8 10 3.2498 4.3063
6 8 11 -2.5301 -7.2877
6 8 12 -0.8596 -0.5676
6 8 13 -2.1804 -3.5120
6 8 14 0.4250 -1.8098
6 8 15 2.5403 1.7915
6 8 16 1.8077 -2.0601
6 8 17 2.2644 1.9699
6 8 18 1.4483 -0.6570
6 8 19 -0.5771 0.9979
6 8 20 -2.8345 -0.2365
6 8 21 -2.5677 2.0823
6 8 22 -2.0766 2.1531
6 8 23 -1.3181 1.0350
6 8 24 3.9716 3.0690
6 8 25 3.6044 -4.9199
6 8 26 0.6279 -3.8388
6 8 27 -1.8843 -0.6352
6 8 28 -2.7245 1.0835
6 8 29 -0.2182 2.4917
6 9 0 -10.1387 0.0600
6 9 1 -6.2557 0.2108
6 9 2 -4.8180 -1.0316
6 9 3 -4.2713 -2.8488
6 9 4 5.9369 5.5480
6 9 5 7.5941 1.2992
6 9 6 6.4908 1.0236
6 9 7 2.6410 4.9562
6 9 8 2.0855 -4.9321
6 9 9 -6.9764 0.1039
6 9 10 -1.8977 -0.4325
6 9 11 -0.5580 -3.7503
6 9 12 -3.2327 0.7309
6 9 13 3.8396 -1.7390
6 9 14 -3.9156 -0.7784
6 9 15 0.5740 2.4812
6 9 16 0.3630 -1.2422
6 9 17 -0.6685 0.4291
6 9 18 6.5241 1.5274
6 9 19 0.4923 -2.8163
6 9 20 -0.9377 2.1977
6 9 21 1.3354 3.5572
6 9 22 0.5122 -2.2072
6 9 23 -2.4269 -0.2842
6 9 24 -1.1481 -1.9220
6 9 25 -2.8872 -2.4258
6 9 26 -1.6965 2.8476
6 9 27 2.2704 0.6085
6 9 28 0.6703 1.4595
6 10 0 -5.9502 0.0202
6 10 1 4.0617 6.2793
6 10 2 3.4074 -3.7018
6 10 3 4.8151 -2.8652
6 10 4 4.1223 -7.2177
6 10 5 -0.2578 -6.6900
6 10 6 -6.1423 -1.9820
6 10 7 -3.2235 1.2943
6 10 8 -1.7490 6.0879
6 10 9 0.3185 2.1920
6 10 10 3.9662 5.6974
6 10 11 -0.7893 0.1710
6 10 12 0.6363 -2.3127
6 10 13 -3.2013 -1.3794
6 10 14 -4.0023 -1.9293
6 10 15 2.6210 -0.4623
6 10 16 0.8245 -3.5451
6 10 17 1.2281 2.4864
6 10 18 4.5441 -0.7098
6 10 19 0.0291 -1.3221
6 10 20 -1.1690 0.5751
6 10 21 -1.1562 -1.6824
6 10 22 -4.1198 2.7180
6 10 23 -1.3601 3.7152
6 10 24 2.4239 3.9900
6 10 25 1.8833 0.1968
6 10 26 3.3375 -3.8417
6 10 27 0.4189 -3.8173
6 10 28 -2.7748 -0.6339
6 11 0 -1.1245 -0.1708
6 11 1 -7.2772 -1.3345
6 11 2 -3.1150 -0.4691
6 11 3 -11.3755 -2.4833
6 11 4 -0.8024 0.0514
6 11 5 3.0972 2.9255
6 11 6 5.5679 -1.7376
6 11 7 5.7964 4.6147
6 11 8 3.7886 1.3344
6 11 9 -1.0886 -0.9298
6 11 10 -4.3170 1.4814
6 11 11 0.4660 -0.8020
6 11 12 -2.0726 0.6409
6 11 13 1.3188 -1.8937
6 11 14 -2.1392 -2.4958
6 11 15 -1.3071 0.5527
6 11 16 0.1798 -1.8307
6 11 17 -3.8980 0.2429
6 11 18 4.4766 3.5376
6 11 19 1.8436 -1.8834
6 11 20 -0.2063 0.5941
6 11 21 3.5172 1.8340
6 11 22 1.5621 -2.9473
6 11 23 -0.1617 0.6481
6 11 24 0.0453 -0.6822
6 11 25 -2.7598 -2.2572
6 11 26 -3.2910 3.2223
6 11 27 -0.0941 -0.2639
6 12 0 -7.7804 -0.0367
6 12 1 -0.6560 6.7817
6 12 2 0.2911 0.6832
6 12 3 2.1267 0.5162
6 12 4 4.7777 -0.0706
6 12 5 2.9915 -8.3032
6 12 6 -0.0319 -2.5201
6 12 7 -2.1485 -3.8835
6 12 8 -1.9316 1.7835
6 12 9 -1.4692 1.6601
6 12 10 3.2107 1.2769
6 12 11 -0.3916 4.6050
6 12 12 1.0062 0.4629
6 12 13 -0.4865 -0.0069
6 12 14 -6.5890 0.2390
6 12 15 0.1862 0.3856
6 12 16 1.8193 -5.0320
6 12 17 -0.9847 0.8810
6 12 18 4.4685 0.8346
6 12 19 0.9576 -4.1843
6 12 20 -2.5479 1.5751
6 12 21 1.4549 -3.1711
6 12 22 -2.9484 -1.4531
6 12 23 -1.9002 3.8818
6 12 24 3.0330 2.7888
6 12 25 -0.8879 3.2935
6 12 26 1.7745 1.3874
6 12 27 2.5815 -2.6515
6 13 0 6.2784 -0.0413
6 13 1 -4.0702 -0.8586
6 13 2 1.7471 -1.1995
6 13 3 -8.2980 0.5646
6 13 4 -6.2633 -3.6832
6 13 5 -0.6869 0.9777
6 13 6 -0.6685 -0.9702
6 13 7 4.0493 -1.1506
6 13 8 3.2106 2.1253
6 13 9 3.0526 0.9919
6 13 10 -2.4336 1.7289
6 13 11 0.5789 1.0550
6 13 12 0.6520 2.7348
6 13 13 0.1076 0.0891
6 13 14 0.3344 -2.7632
6 13 15 -2.0758 -1.2596
6 13 16 -0.3854 -1.9369
6 13 17 -5.3429 -1.4776
6 13 18 -0.3284 4.1573
6 13 19 1.1822 1.1722
6 13 20 -0.2802 -0.5000
6 13 21 3.7696 1.2545
6 13 22 1.6043 -3.8921
6 13 23 1.4471 -1.0864
6 13 24 1.5195 1.0903
6 13 25 0.1955 -1.7270
6 13 26 -2.2447 3.2091
6 14 0 -3.1336 0.0660
6 14 1 -3.2675 3.5176
6 14 2 -2.5929 3.4212
6 14 3 -1.8817 -0.3571
6 14 4 3.1052 5.3647
6 14 5 1.6352 -2.8278
6 14 6 2.4261 -0.9089
6 14 7 1.0758 -2.9479
6 14 8 -1.0053 -2.7122
6 14 9 -2.4076 -0.1023
6 14 10 2.8424 -3.8618
6 14 11 0.9868 2.9467
6 14 12 -0.2442 1.2113
6 14 13 2.5475 1.0129
6 14 14 -4.2241 3.1942
6 14 15 -3.3955 2.8367
6 14 16 1.7607 -1.4599
6 14 17 -0.4105 -1.0182
6 14 18 1.5806 1.0116
6 14 19 2.0655 -4.7390
6 14 20 -3.2517 0.8455
6 14 21 0.2732 -1.4778
6 14 22 0.3764 -4.0779
6 14 23 -1.8505 1.0955
6 14 24 2.8969 0.4011
6 14 25 -0.0258 2.6457
6 15 0 9.4008 0.0155
6 15 1 0.3450 1.0686
6 15 2 2.6341 -1.2057
6 15 3 0.5611 1.9999
6 15 4 -6.2249 -3.3882
6 15 5 -1.8729 -1.9018
6 15 6 -3.1687 1.8991
6 15 7 -1.1639 -2.9280
6 15 8 -0.9257 -1.0833
6 15 9 3.9769 0.7657
6 15 10 -0.5555 1.1811
6 15 11 -0.5153 0.1810
6 15 12 4.0909 2.5871
6 15 13 -1.1674 2.3877
6 15 14 3.3532 -0.5110
6 15 15 1.5088 -2.2748
6 15 16 -1.8002 -1.1503
6 15 17 -3.4313 -1.4056
6 15 18 -3.2705 1.3159
6 15 19 -2.1192 3.4233
6 15 20 -1.1787 -0.4707
6 15 21 2.3558 0.1305
6 15 22 0.2068 -1.3446
6 15 23 2.6229 -3.0590
6 15 24 1.2806 0.3761
6 15 25 1.0539 -0.2967
6 16 0 3.3082 0.0415
6 16 1 -1.5533 -1.1985
6 16 2 -3.4942 4.8048
6 16 3 -4.3860 -1.0029
6 16 4 0.3701 3.2613
6 16 5 -0.5197 2.4718
6 16 6 2.8614 2.2246
6 16 7 3.0806 0.8784
6 16 8 0.2886 -2.8289
6 16 9 -2.5168 -0.0817
6 16 10 -0.6204 -6.9122
6 16 11 1.5991 -0.0882
6 16 12 -0.5678 -0.3557
6 16 13 2.5863 -2.7176
6 16 14 0.7740 4.9129
6 16 15 -2.4934 2.9837
6 16 16 -0.3186 2.2724
6 16 17 0.6994 1.4765
6 16 18 -0.7287 0.1541
6 16 19 0.5479 -3.1127
6 16 20 -1.3984 0.2888
6 16 21 -1.2739 0.3106
6 16 22 1.7225 -3.4925
6 16 23 0.0776 -0.8485
6 16 24 0.9937 -1.7652
6 17 0 5.6616 -0.0002
6 17 1 4.9429 1.4449
6 17 2 0.6483 0.6644
6 17 3 5.9524 3.0481
6 17 4 -0.7729 -1.8921
6 17 5 -0.9168 -4.6451
6 17 6 -2.1509 2.2683
6 17 7 -2.7603 -1.4986
6 17 8 -5.7271 -0.9221
6 17 9 0.7957 0.7472
6 17 10 1.9713 0.0233
6 17 11 -3.3649 -0.5676
6 17 12 5.6455 0.6457
6 17 13 -1.4994 0.9607
6 17 14 0.6818 1.4110
6 17 15 6.6481 -1.1393
6 17 16 -1.4537 -1.7628
6 17 17 -1.1095 1.0674
6 17 18 -0.3428 0.0397
6 17 19 -3.2423 1.6271
6 17 20 -2.9027 0.3968
6 17 21 0.5152 -1.9376
6 17 22 -1.7902 0.3299
6 17 23 1.8162 -1.1187
6 18 0 4.3780 -0.0072
6 18 1 3.4207 -4.4211
6 18 2 -1.0876 2.5067
6 18 3 -4.1900 -0.3269
6 18 4 -1.6866 -0.6470
6 18 5 -4.1863 2.9684
6 18 6 1.2832 3.2094
6 18 7 4.8815 5.4121
6 18 8 1.5576 -0.7832
6 18 9 0.6167 1.3597
6 18 10 -2.8043 -5.3662
6 18 11 -1.2212 -2.9341
6 18 12 -0.6590 0.6892
6 18 13 0.5391 -6.4185
6 18 14 1.7647 3.1498
6 18 15 1.2734 2.2224
6 18 16 0.1179 0.6650
6 18 17 0.3931 3.7824
6 18 18 -1.2448 0.0437
6 18 19 -1.7041 -1.6584
6 18 20 -1.0970 0.1713
6 18 21 -1.0506 1.7017
6 18 22 1.3618 -1.1855
6 19 0 -1.9616 0.0342
6 19 1 4.0852 -0.2429
6 19 2 -0.8660 0.5741
6 19 3 4.8035 4.3467
6 19 4 3.3137 2.0607
6 19 5 3.6206 -4.9902
6 19 6 0.8004 0.0603
6 19 7 -1.5953 -1.2937
6 19 8 -4.8159 -0.5806
6 19 9 -5.1792 1.7817
6 19 10 2.2749 -0.2605
6 19 11 -3.0774 -1.0090
6 19 12 3.8305 0.6894
6 19 13 1.3511 -0.0933
6 19 14 -4.1998 0.2083
6 19 15 5.3576 1.4561
6 19 16 -0.1794 -2.1593
6 19 17 -1.1167 0.5568
6 19 18 2.8521 1.9355
6 19 19 -0.1967 -0.2101
6 19 20 -2.0897 0.1091
6 19 21 -0.6171 -1.9509
6 20 0 -1.2576 0.0352
6 20 1 4.7344 -3.5596
6 20 2 3.2280 -0.5806
6 20 3 -1.1539 -0.7263
6 20 4 -0.4162 -3.9701
6 20 5 -4.9862 1.4146
6 20 6 -3.1965 -0.0564
6 20 7 3.2590 6.2225
6 20 8 1.1704 3.4825
6 20 9 2.9099 1.5605
6 20 10 -0.4799 -0.7976
6 20 11 -1.6052 -4.0640
6 20 12 -0.7395 1.2799
6 20 13 -0.4339 -4.8416
6 20 14 0.1111 0.5532
6 20 15 1.2957 2.2357
6 20 16 1.4824 -1.8753
6 20 17 0.7236 2.9878
6 20 18 -1.1256 -0.0110
6 20 19 -2.1645 -1.0668
6 21 0 -3.9332 -0.0339
6 21 1 -0.8269 -1.2912
6 21 2 -2.6859 -1.5131
6 21 3 0.6178 2.0842
6 21 4 1.3808 4.6053
6 21 5 5.0817 -1.3553
6 21 6 5.7477 -0.8918
6 21 7 0.2168 -0.6618
6 21 8 0.4116 -0.1488
6 21 9 -5.7482 0.7301
6 21 10 -1.7261 -0.5211
6 21 11 -1.1983 -1.8341
6 21 12 1.1275 -1.1931
6 21 13 4.0687 1.6066
6 21 14 -3.8505 -0.4006
6 21 15 0.7440 2.4765
6 21 16 -0.3661 0.8697
6 21 17 -2.1255 -1.2801
6 21 18 2.4067 1.3121
6 22 0 -4.6918 -0.0063
6 22 1 0.5530 -0.1863
6 22 2 3.5818 -1.9494
6 22 3 1.2156 -0.1117
6 22 4 1.8892 -5.1596
6 22 5 -0.6708 -0.8733
6 22 6 -3.4857 -2.2094
6 22 7 0.1280 0.5394
6 22 8 -1.5820 4.7330
6 22 9 1.2412 1.9104
6 22 10 -0.0234 2.3298
6 22 11 0.0600 -1.8551
6 22 12 1.1248 0.5725
6 22 13 -0.1173 -1.6353
6 22 14 0.8079 -0.5578
6 22 15 0.4768 2.1975
6 22 16 -0.0087 -2.4536
6 23 0 -0.1826 0.0043
6 23 1 -3.0022 -0.8225
6 23 2 -3.3723 -1.7945
6 23 3 -3.0376 -0.7460
6 23 4 -1.6191 2.0882
6 23 5 0.6670 0.5469
6 23 6 5.6512 -0.0203
6 23 7 2.1191 0.1157
6 23 8 3.4152 1.5928
6 23 9 -0.6052 1.2066
6 23 10 -2.7200 -1.1135
6 23 11 -0.5248 -0.6337
6 23 12 -1.0450 -4.6604
6 23 13 3.5658 -0.2112
6 23 14 -0.6852 0.4811
6 24 0 -1.9008 -0.0180
6 24 1 -2.1564 3.5370
6 24 2 0.5289 -1.7655
6 24 3 0.0397 -0.4997
6 24 4 1.1757 -1.8611
6 24 5 2.9081 -2.8766
6 24 6 -0.4024 -0.8049
6 24 7 0.9119 -2.5252
6 24 8 -2.4391 -0.3207
6 24 9 -1.2593 0.4335
6 24 10 -0.8373 2.5914
6 24 11 -1.3093 0.3631
6 24 12 1.9339 0.9048
6 25 0 3.5384 0.0472
6 25 1 -1.8433 -0.1003
6 25 2 -1.5897 -0.4753
6 25 3 -3.9187 -1.0037
6 25 4 -2.6028 -0.1316
6 25 5 -1.7456 -0.3929
6 25 6 0.5753 -0.0494
6 25 7 0.8805 0.7025
6 25 8 2.7279 0.1966
6 25 9 2.0606 2.0164
6 26 0 1.9727 0.0106
6 26 1 -0.9931 4.8152
6 26 2 -1.2008 1.6603
6 26 3 -1.0827 -2.5863
6 26 4 -1.8240 0.7783
7 0 1 -0.8151 -3.6913
7 0 2 -3.9496 -1.2794
7 0 3 -0.6911 -0.9086
7 0 4 -4.1688 0.3102
7 0 5 1.0024 8.8831
7 0 6 -8.1475 1.2022
7 0 7 0.5131 3.8978
7 0 8 8.6807 -0.4592
7 0 9 -1.0834 -5.8496
7 0 10 8.0302 -1.0692
7 0 11 -0.2890 -5.2196
7 0 12 -3.9353 0.7132
7 0 13 1.0538 2.9903
7 0 14 -2.5110 0.8468
7 0 15 0.0648 2.4803
7 0 16 2.2363 -0.8986
7 0 17 -0.9461 -3.0447
7 0 18 -4.3484 -0.5294
7 0 19 0.1781 1.9074
7 0 20 -1.3019 0.9234
7 0 21 0.7452 1.9778
7 0 22 6.2094 0.1884
7 0 23 -0.2903 -3.4323
7 0 24 1.0558 -0.7808
7 0 25 -0.5500 -2.5485
7 0 26 -3.4966 0.0142
7 0 27 0.3134 4.2175
7 0 28 -0.7558 0.6152
7 1 0 -0.3462 3.2290
7 1 1 4.0661 1.4188
7 1 2 3.4493 2.1096
7 1 3 -0.3587 1.6287
7 1 4 1.5516 4.7792
7 1 5 -0.9447 3.1644
7 1 6 -1.2655 -8.1629
7 1 7 -1.5865 0.3281
7 1 8 0.3749 -10.0752
7 1 9 -2.1621 -4.6213
7 1 10 1.2737 6.8622
7 1 11 -1.8930 -2.4994
7 1 12 -2.6416 5.8165
7 1 13 2.3402 2.8368
7 1 14 -1.5353 -1.5132
7 1 15 2.3872 1.8336
7 1 16 2.2833 -1.3569
7 1 17 -0.4537 0.2392
7 1 18 1.7583 0.9228
7 1 19 -1.8980 -1.5370
7 1 20 -1.9265 -2.5621
7 1 21 -0.7109 -0.6055
7 1 22 -0.4369 -0.2407
7 1 23 0.2270 1.5273
7 1 24 0.1264 1.5071
7 1 25 1.7427 -1.3783
7 1 26 0.1260 0.8115
7 1 27 1.1166 -0.9536
7 1 28 1.3486 -1.0332
7 2 0 0.7776 1.6956
7 2 1 4.6822 -1.5834
7 2 2 -0.9891 -3.3418
7 2 3 -0.2595 -2.1981
7 2 4 -2.7654 -3.9627
7 2 5 -1.9856 4.9184
7 2 6 -6.3073 4.4791
7 2 7 -6.5025 3.8561
7 2 8 5.6919 4.2346
7 2 9 -2.7591 -3.4261
7 2 10 5.2457 -0.3107
7 2 11 6.4163 -3.8092
7 2 12 -3.2680 -2.6565
7 2 13 2.7786 2.0110
7 2 14 -0.6491 -0.3180
7 2 15 -1.8941 2.6269
7 2 16 2.3212 1.0348
7 2 17 0.6037 -2.7704
7 2 18 -3.1394 -1.4999
7 2 19 -2.7900 0.1424
7 2 20 -2.7159 0.7497
7 2 21 -0.6067 2.3684
7 2 22 5.5327 2.1138
7 2 23 0.6216 -2.0699
7 2 24 1.4061 -0.6467
7 2 25 1.3296 -1.9355
7 2 26 -4.7491 -4.1849
7 2 27 0.8144 2.2019
7 2 28 0.3107 2.0967
7 3 0 -0.0234 -2.1247
7 3 1 -1.4711 1.6681
7 3 2 6.1864 0.3414
7 3 3 2.0835 4.1909
7 3 4 1.8709 3.8426
7 3 5 2.2296 6.9958
7 3 6 -0.9538 -1.6621
7 3 7 -2.7613 1.0600
7 3 8 0.5752 -4.2620
7 3 9 -0.6304 -10.1783
7 3 10 1.7192 2.6391
7 3 11 1.5618 -5.3644
7 3 12 -4.4742 0.5405
7 3 13 -0.0131 6.2638
7 3 14 -1.9836 -1.3406
7 3 15 -2.1174 2.8507
7 3 16 4.0978 0.2748
7 3 17 0.3868 0.3855
7 3 18 1.8299 2.8112
7 3 19 2.5549 -2.0878
7 3 20 -3.0843 -1.8131
7 3 21 -2.1516 -0.4060
7 3 22 -0.0168 -2.4724
7 3 23 -1.4744 0.7180
7 3 24 -0.5165 3.5772
7 3 25 2.4843 -2.0269
7 3 26 0.4811 -0.0515
7 3 27 -0.0731 -0.0498
7 3 28 2.2897 -3.6055
7 4 0 0.3448 0.4423
7 4 1 4.9632 0.4479
7 4 2 5.0137 -1.3556
7 4 3 0.8768 -2.4849
7 4 4 1.4321 -4.3771
7 4 5 -1.8005 -1.9332
7 4 6 -2.1755 2.5666
7 4 7 -7.5152 1.1899
7 4 8 -0.5701 4.6713
7 4 9 -5.0293 2.2878
7 4 10 -1.3601 0.2273
7 4 11 8.3657 0.4824
7 4 12 -0.8024 -2.5414
7 4 13 2.9004 -1.5577
7 4 14 1.9750 -1.1842
7 4 15 -2.2519 0.7699
7 4 16 1.3207 2.4933
7 4 17 1.2281 -0.2020
7 4 18 0.6953 -0.5307
7 4 19 -2.0172 -1.0700
7 4 20 -3.2310 -1.4818
7 4 21 -2.5045 1.2613
7 4 22 1.6538 2.6214
7 4 23 0.5002 -0.4550
7 4 24 -0.0072 0.1612
7 4 25 4.0564 -0.1751
7 4 26 -2.8584 -4.5875
7 4 27 -1.6775 -0.7183
7 5 0 -0.2362 -7.0533
7 5 1 -6.3381 -0.8932
7 5 2 2.4403 -2.3203
7 5 3 4.7271 2.2603
7 5 4 -0.1923 2.6953
7 5 5 3.0847 5.2482
7 5 6 1.0313 4.4550
7 5 7 -1.9597 2.6515
7 5 8 -0.1296 3.4210
7 5 9 1.3059 -7.7846
7 5 10 1.6598 -1.0045
7 5 11 1.9578 -4.9334
7 5 12 -1.4550 -5.5284
7 5 13 -2.0891 5.1245
7 5 14 -1.4163 -1.3194
7 5 15 -3.6329 1.5692
7 5 16 1.9756 1.4557
7 5 17 1.9963 -0.5350
7 5 18 -0.3492 3.7698
7 5 19 4.2760 -0.9595
7 5 20 -0.5022 -0.8099
7 5 21 -3.4598 1.4882
7 5 22 0.7456 -1.5976
7 5 23 -2.0846 -1.6266
7 5 24 -2.3299 2.8582
7 5 25 2.7874 -0.4905
7 5 26 1.0212 -2.1244
7 5 27 -0.4441 0.8599
7 6 0 -0.0053 -1.5770
7 6 1 -0.4935 -1.0942
7 6 2 7.3642 1.8997
7 6 3 2.1534 -1.6615
7 6 4 4.5880 -0.4082
7 6 5 0.9668 -3.2887
7 6 6 1.6390 -2.6966
7 6 7 -2.8717 -1.8723
7 6 8 -3.7947 -1.1178
7 6 9 -4.2734 4.9214
7 6 10 -7.2804 2.3017
7 6 11 4.3091 2.8040
7 6 12 0.9062 2.7612
7 6 13 1.2996 -3.5407
7 6 14 3.2376 -3.0899
7 6 15 -1.3727 -1.5556
7 6 16 0.5746 0.0686
7 6 17 -0.2949 1.5713
7 6 18 2.8844 2.6467
7 6 19 1.2521 0.3912
7 6 20 -1.3692 -2.1656
7 6 21 -1.0022 -0.4861
7 6 22 -2.1290 0.9464
7 6 23 -0.4663 -0.1961
7 6 24 -2.4174 0.7372
7 6 25 1.6119 1.1500
7 6 26 1.4708 -1.8145
7 6 27 -1.6822 -1.1865
7 7 0 -0.2906 -5.6094
7 7 1 -6.2629 -3.7563
7 7 2 -4.0796 -3.6706
7 7 3 5.4830 -3.1738
7 7 4 -1.5852 0.9567
7 7 5 0.9114 0.8303
7 7 6 1.4566 6.3035
7 7 7 -1.4933 3.1385
7 7 8 0.2897 6.7695
7 7 9 1.8474 -1.1878
7 7 10 2.7152 -2.3671
7 7 11 0.7821 -0.7169
7 7 12 0.7950 -7.0215
7 7 13 -1.8205 1.8367
7 7 14 -2.1145 -1.0537
7 7 15 -2.5440 -1.0793
7 7 16 -0.3521 1.6196
7 7 17 2.7260 -2.0471
7 7 18 -0.7936 2.5957
7 7 19 2.9467 0.5874
7 7 20 1.9739 -0.4858
7 7 21 -3.0378 1.7928
7 7 22 0.4402 0.7050
7 7 23 -1.0068 -0.6701
7 7 24 -2.8349 1.3161
7 7 25 2.3637 1.1235
7 7 26 0.8597 -2.6511
7 7 27 -0.6047 -1.3151
7 8 0 0.0965 0.1235
7 8 1 -5.8148 -3.8739
7 8 2 3.5339 2.5444
7 8 3 1.4055 -0.9143
7 8 4 4.0670 1.8214
7 8 5 5.0358 2.3478
7 8 6 2.8615 -4.8846
7 8 7 2.7194 -2.7022
7 8 8 -3.3042 -5.6251
7 8 9 -1.4455 -0.2899
7 8 10 -6.7502 3.7825
7 8 11 -1.4645 2.3645
7 8 12 0.8593 6.6148
7 8 13 -0.6349 0.1728
7 8 14 2.5528 -3.6393
7 8 15 -0.8798 -2.5385
7 8 16 0.7730 -2.8855
7 8 17 -1.7262 -1.1930
7 8 18 1.1565 3.6198
7 8 19 3.5661 2.5531
7 8 20 -0.1488 -0.7244
7 8 21 2.3855 0.2628
7 8 22 -1.1895 -1.1912
7 8 23 -1.2600 -1.4168
7 8 24 -1.8223 0.1097
7 8 25 -3.2686 0.8833
7 8 26 0.0357 1.7402
7 9 0 -0.0055 0.5110
7 9 1 -1.1051 -3.5715
7 9 2 -7.1904 -1.3892
7 9 3 2.4773 -7.6524
7 9 4 -0.6549 -2.1331
7 9 5 -1.5817 -2.9958
7 9 6 1.3132 2.6732
7 9 7 -2.1253 3.8395
7 9 8 0.3089 5.1528
7 9 9 1.5509 3.6423
7 9 10 2.6128 -1.9318
7 9 11 0.5865 2.3425
7 9 12 1.2721 -3.8442
7 9 13 -0.4989 -0.3297
7 9 14 -2.3242 0.4212
7 9 15 -0.9503 -2.6695
7 9 16 -1.7867 1.2206
7 9 17 1.5025 -2.7503
7 9 18 -0.6209 -0.4059
7 9 19 1.1540 1.2720
7 9 20 2.5918 -0.1705
7 9 21 -1.1932 0.6850
7 9 22 -0.1914 0.7369
7 9 23 -0.4920 1.0801
7 9 24 -1.0112 1.6472
7 9 25 2.3930 2.1576
7 9 26 1.1214 -1.0964
7 10 0 0.0161 2.5144
7 10 1 -6.3440 -3.3110
7 10 2 -2.3032 0.8405
7 10 3 -0.1457 -0.0668
7 10 4 -1.7439 0.1992
7 10 5 6.4646 6.3813
7 10 6 3.0540 -2.0762
7 10 7 4.5425 -1.9152
7 10 8 0.7144 -3.5382
7 10 9 0.0560 -6.0679
7 10 10 -2.2539 1.5150
7 10 11 -3.2326 1.2708
7 10 12 -0.5423 5.0964
7 10 13 -1.6918 3.9018
7 10 14 1.6399 -1.1877
7 10 15 -1.1390 -1.8226
7 10 16 0.5740 -2.2869
7 10 17 -1.0963 -3.2567
7 10 18 -2.3624 0.9409
7 10 19 3.2916 2.8584
7 10 20 -0.1496 -0.3591
7 10 21 2.8205 2.0153
7 10 22 2.9690 -1.4881
7 10 23 -0.6892 -2.7167
7 10 24 0.1340 -0.6439
7 10 25 -3.0654 -1.6585
7 11 0 -0.0206 5.6332
7 11 1 3.3178 -1.5989
7 11 2 -2.6457 2.8827
7 11 3 -1.3361 -5.0471
7 11 4 0.0486 -5.0763
7 11 5 -2.6297 -3.2626
7 11 6 0.3441 -3.7527
7 11 7 -1.6630 1.8198
7 11 8 -0.1382 2.5239
7 11 9 1.1110 4.0663
7 11 10 1.7825 -0.0166
7 11 11 0.3769 2.5892
7 11 12 0.3919 -0.4948
7 11 13 0.6850 -1.1236
7 11 14 -2.2642 2.0742
7 11 15 1.1886 -1.6560
7 11 16 -0.6926 1.0813
7 11 17 -0.0025 -1.1414
7 11 18 -0.7031 -2.7405
7 11 19 -1.2886 -0.4769
7 11 20 0.9262 -0.4198
7 11 21 -0.3954 0.0226
7 11 22 0.1194 -0.3912
7 11 23 -0.7795 1.4370
7 11 24 0.7523 1.7319
7 11 25 2.7439 2.4771
7 12 0 0.0080 1.5814
7 12 1 -2.3930 -1.7695
7 12 2 -5.9376 -0.6516
7 12 3 0.6552 0.3791
7 12 4 -5.7179 -1.2705
7 12 5 1.2908 5.5976
7 12 6 2.3057 1.6361
7 12 7 1.8239 -1.2721
7 12 8 3.9358 0.8656
7 12 9 1.1533 -6.1647
7 12 10 1.1542 -1.9066
7 12 11 -0.6873 -0.0001
7 12 12 -0.9586 1.6768
7 12 13 -1.9435 3.7773
7 12 14 1.1094 0.7420
7 12 15 -0.6826 -0.3577
7 12 16 -0.2723 -0.8941
7 12 17 0.3098 -1.3843
7 12 18 -4.3128 -0.7650
7 12 19 0.6654 2.4851
7 12 20 -0.4278 -0.3058
7 12 21 0.5043 1.3062
7 12 22 5.2354 -0.5297
7 12 23 1.2611 -3.6642
7 12 24 0.9155 -0.1611
7 13 0 -0.0329 7.2635
7 13 1 1.7838 0.4534
7 13 2 3.3414 2.7153
7 13 3 -0.1620 2.4362
7 13 4 0.5896 -3.9981
7 13 5 -1.9191 -1.0982
7 13 6 -1.1639 -4.8138
7 13 7 -1.5700 -2.0466
7 13 8 -0.6213 -1.1727
7 13 9 0.6398 1.3668
7 13 10 0.7876 1.3017
7 13 11 0.7553 1.0073
7 13 12 -1.2032 1.5589
7 13 13 1.5514 -1.0894
7 13 14 -2.1860 1.4156
7 13 15 1.1667 0.7228
7 13 16 2.3594 1.0941
7 13 17 -0.0401 1.4416
7 13 18 0.9652 -0.8699
7 13 19 -2.4101 -2.4202
7 13 20 -1.5919 -2.4173
7 13 21 -1.8284 -0.1055
7 13 22 -0.7250 -1.5705
7 13 23 -0.2888 1.2960
7 14 0 0.0254 1.3770
7 14 1 2.3820 -1.5164
7 14 2 -5.9677 -2.1092
7 14 3 0.8370 -0.3322
7 14 4 -2.0009 -2.0645
7 14 5 -3.0413 2.5763
7 14 6 -0.5521 4.6271
7 14 7 -1.9090 -0.7514
7 14 8 3.0201 3.4606
7 14 9 -0.1199 -1.8393
7 14 10 1.9642 -3.4945
7 14 11 2.8203 -1.1967
7 14 12 -0.0642 -1.5178
7 14 13 -0.3313 1.4350
7 14 14 0.5339 0.4663
7 14 15 -0.1564 1.3516
7 14 16 -0.0894 -0.7889
7 14 17 0.9770 0.2570
7 14 18 -3.4279 -0.0630
7 14 19 -1.4523 1.6266
7 14 20 -0.8265 1.8990
7 14 21 -2.0971 -0.3202
7 14 22 3.7666 0.4568
7 14 23 1.9443 -3.4863
7 15 0 0.0200 4.6434
7 15 1 -2.0142 3.0462
7 15 2 2.9829 -1.0751
7 15 3 2.0508 4.9523
7 15 4 2.7903 0.4654
7 15 5 0.6945 0.6506
7 15 6 -0.8506 -1.5393
7 15 7 -1.0490 -0.5351
7 15 8 -1.8886 -3.4075
7 15 9 0.4320 -3.2221
7 15 10 -0.8318 1.8574
7 15 11 0.2808 -2.0604
7 15 12 -2.0781 1.2307
7 15 13 1.4548 1.1953
7 15 14 -0.7145 -1.1625
7 15 15 -0.8760 1.6705
7 15 16 4.1832 1.1499
7 15 17 -0.0444 1.2149
7 15 18 2.7380 2.5324
7 15 19 -0.3876 -0.7227
7 15 20 -2.4754 -3.8410
7 15 21 -1.8157 0.0703
7 15 22 -3.0083 -1.4786
7 16 0 -0.0895 1.7394
7 16 1 4.4898 0.5167
7 16 2 -2.9338 -2.5033
7 16 3 -1.3807 -1.9614
7 16 4 1.9548 -2.1251
7 16 5 -0.8771 -2.2590
7 16 6 -0.9467 4.7702
7 16 7 -4.4633 0.4701
7 16 8 1.4577 3.1033
7 16 9 -3.1320 3.8413
7 16 10 -1.5291 -1.8893
7 16 11 4.9192 -0.7937
7 16 12 0.2912 -2.8858
7 16 13 1.8879 -1.7053
7 16 14 1.4960 -1.7596
7 16 15 -0.9519 2.2998
7 16 16 0.3857 -0.1150
7 16 17 0.4553 -0.3380
7 16 18 -1.5127 1.8457
7 16 19 -0.9193 -0.6213
7 16 20 0.4287 2.8194
7 16 21 -2.4073 -0.4804
7 17 0 -0.0322 -0.3048
7 17 1 -3.5104 3.8874
7 17 2 0.2338 -2.2385
7 17 3 0.4675 1.8024
7 17 4 2.3983 1.8555
7 17 5 3.7077 2.2189
7 17 6 0.6447 0.3818
7 17 7 1.0206 2.7949
7 17 8 -1.9571 0.8526
7 17 9 0.8839 -6.5585
7 17 10 -0.8866 0.9379
7 17 11 -1.2854 -3.0127
7 17 12 -2.0847 -2.3243
7 17 13 -0.2187 3.7272
7 17 14 0.7503 -1.6126
7 17 15 -2.5548 0.7347
7 17 16 3.9773 1.7206
7 17 17 0.0966 -0.9294
7 17 18 1.3752 1.8588
7 17 19 2.2099 1.1961
7 17 20 -2.5523 -2.3408
7 18 0 -0.0329 -0.8695
7 18 1 3.7879 1.3583
7 18 2 0.5180 0.4628
7 18 3 -2.7012 -3.3638
7 18 4 2.0756 -0.6099
7 18 5 0.8465 -4.1460
7 18 6 2.8836 0.3677
7 18 7 -3.6371 0.6445
7 18 8 -0.4790 0.3070
7 18 9 -2.3833 5.5743
7 18 10 -6.0755 0.9352
7 18 11 3.3488 1.4647
7 18 12 0.3839 -0.8703
7 18 13 1.7756 -2.5467
7 18 14 3.4911 -3.4457
7 18 15 -1.0451 0.9068
7 18 16 0.3846 1.3652
7 18 17 -1.1741 -1.7363
7 18 18 -1.3893 3.3582
7 19 0 0.0221 -2.8701
7 19 1 -3.5351 2.0256
7 19 2 -1.3393 -1.5088
7 19 3 0.0752 -0.4655
7 19 4 -1.3613 -0.7524
7 19 5 3.3646 1.1228
7 19 6 1.6800 2.7332
7 19 7 1.5972 2.0042
7 19 8 -1.3362 5.8991
7 19 9 1.5343 -3.4295
7 19 10 0.9889 -2.0578
7 19 11 -1.5944 -1.4911
7 19 12 0.2077 -4.4770
7 19 13 -1.2556 2.6163
7 19 14 0.9668 0.0469
7 19 15 -2.7365 0.0861
7 19 16 0.9682 2.2357
7 19 17 1.0172 -1.2444
7 20 0 0.0394 -0.3460
7 20 1 1.4460 -1.8967
7 20 2 2.7079 2.7512
7 20 3 -2.8158 -2.5190
7 20 4 1.9002 -0.6810
7 20 5 0.2680 -0.3636
7 20 6 3.8330 -2.0131
7 20 7 1.5338 -0.8738
7 20 8 -2.5632 -2.3975
7 20 9 -0.3329 2.5071
7 20 10 -5.1744 0.2817
7 20 11 -0.3334 2.0606
7 20 12 0.0510 2.0060
7 20 13 0.1595 -1.3770
7 20 14 3.3947 -1.5428
7 20 15 -0.2312 -0.3873
7 21 0 0.0282 -1.9136
7 21 1 -1.6624 0.3361
7 21 2 -3.7067 -1.0736
7 21 3 1.0975 -1.5370
7 21 4 -1.9085 -1.6689
7 21 5 0.2264 -3.2572
7 21 6 1.2215 3.5521
7 21 7 0.9294 1.3821
7 21 8 -1.8829 4.3087
7 21 9 0.0299 2.5439
7 21 10 2.5492 -2.2051
7 21 11 -1.9331 -1.1092
7 21 12 2.6067 -2.9740
7 21 13 1.1360 0.4248
7 21 14 0.8453 0.5716
7 22 0 -0.0227 4.7861
7 22 1 -1.9372 -1.9012
7 22 2 2.4653 0.6711
7 22 3 -1.5452 0.1692
7 22 4 0.6687 -2.3639
7 22 5 1.5354 2.1080
7 22 6 0.4737 0.6432
7 22 7 3.9615 -0.1567
7 22 8 -0.8311 -3.1903
7 22 9 -0.2080 -0.7497
7 22 10 -1.3920 -1.4831
7 22 11 -0.9363 -1.1853
7 23 0 -0.0237 1.0767
7 23 1 1.8439 -0.1832
7 23 2 -3.5614 -0.0035
7 23 3 -0.5497 -2.5756
7 23 4 0.4246 -0.7809
7 23 5 -0.5331 -3.9642
7 23 6 -0.6601 0.3303
7 23 7 -0.4245 1.6504
7 23 8 -0.7581 0.2931
7 24 0 -0.0141 4.9971
7 24 1 -3.2635 2.8441
7 24 2 -1.7681 -1.5765
7 24 3 0.8663 1.3865
7 24 4 -0.4383 -2.1159
8 0 0 1.7645 0.9721
8 0 1 0.4443 -1.1775
8 0 2 5.4012 -0.0752
8 0 3 -0.5614 1.4627
8 0 4 0.5589 -1.2278
8 0 5 -0.2920 0.4758
8 0 6 -6.7593 0.3717
8 0 7 0.5675 -2.8827
8 0 8 -5.3704 1.3234
8 0 9 0.1601 0.8902
8 0 10 0.0388 -0.6923
8 0 11 -0.5532 3.6715
8 0 12 6.9669 -1.0855
8 0 13 -0.0230 -2.9547
8 0 14 1.2853 0.9084
8 0 15 0.4594 -1.1902
8 0 16 -4.3335 0.7587
8 0 17 -0.0231 4.1328
8 0 18 1.0152 -0.9739
8 0 19 -0.3609 -2.2257
8 0 20 0.6674 -0.4128
8 0 21 0.0296 -1.7853
8 0 22 -4.1130 0.9305
8 0 23 0.3069 0.0568
8 0 24 2.7675 0.1238
8 0 25 -0.0636 1.5089
8 1 0 -0.2167 -0.2435
8 1 1 4.4052 -3.0925
8 1 2 0.2794 5.9119
8 1 3 3.3503 0.6697
8 1 4 0.7488 6.1208
8 1 5 -4.9220 2.6753
8 1 6 -1.1259 -1.4547
8 1 7 -1.4593 0.8558
8 1 8 -0.9391 -1.4202
8 1 9 5.1059 0.4388
8 1 10 0.7955 -2.3388
8 1 11 0.5619 0.4401
8 1 12 1.8317 -3.9546
8 1 13 -4.0782 -2.3649
8 1 14 -0.4761 2.3882
8 1 15 0.8349 -1.2417
8 1 16 -1.8329 4.3352
8 1 17 0.9783 2.5587
8 1 18 -0.1888 -1.6783
8 1 19 -0.1662 0.7249
8 1 20 1.3697 -1.6256
8 1 21 -1.0109 -1.0017
8 1 22 0.5249 0.2209
8 1 23 -0.4533 -0.7557
8 1 24 -2.5096 -1.5287
8 1 25 1.6950 0.7943
8 2 0 1.2425 0.4158
8 2 1 -0.3900 -2.3700
8 2 2 3.4890 1.9637
8 2 3 3.6063 2.9171
8 2 4 0.1903 0.2304
8 2 5 5.7259 1.4176
8 2 6 -4.2792 -0.2710
8 2 7 -0.9129 -3.3652
8 2 8 -2.4003 -1.6827
8 2 9 -5.4380 0.4653
8 2 10 -0.2667 -0.1138
8 2 11 -2.4302 2.7342
8 2 12 3.0358 1.0198
8 2 13 2.4483 -2.4835
8 2 14 1.1979 0.8213
8 2 15 2.7548 -0.1051
8 2 16 -1.4888 -0.6477
8 2 17 -2.2864 3.3653
8 2 18 0.1488 0.6869
8 2 19 0.9050 -1.0788
8 2 20 0.1603 -0.8656
8 2 21 0.4659 -2.6517
8 2 22 -2.8701 0.9436
8 2 23 -2.7625 -0.0877
8 2 24 2.1285 -0.8651
8 2 25 0.0926 3.0381
8 3 0 -1.4981 -0.2832
8 3 1 4.0784 -6.6754
8 3 2 0.4535 -0.6278
8 3 3 4.1141 0.3810
8 3 4 2.8036 1.9849
8 3 5 -3.2511 5.8004
8 3 6 -2.7957 0.5224
8 3 7 -2.0433 3.3732
8 3 8 -2.6698 -0.7817
8 3 9 2.3632 -0.7787
8 3 10 1.8756 -0.2651
8 3 11 0.3716 0.8959
8 3 12 3.2040 -0.5371
8 3 13 -0.1067 -3.2924
8 3 14 -0.0093 0.0676
8 3 15 0.5522 -3.2392
8 3 16 -3.3496 -0.1416
8 3 17 -0.4076 4.0162
8 3 18 -0.5848 0.1869
8 3 19 -0.7853 1.9178
8 3 20 3.0936 1.0930
8 3 21 -1.3186 -1.0093
8 3 22 -0.6399 -0.0342
8 3 23 2.0859 -1.7915
8 3 24 -4.1246 -2.6885
8 4 0 -0.9782 -0.0829
8 4 1 0.2335 -4.5478
8 4 2 -1.1126 0.2588
8 4 3 3.9177 3.8731
8 4 4 -0.4413 0.4232
8 4 5 6.4743 2.8886
8 4 6 2.3082 1.8163
8 4 7 -2.0790 -2.2958
8 4 8 3.0809 -2.8308
8 4 9 -5.2616 -0.8021
8 4 10 -2.4054 -0.9170
8 4 11 -0.7786 0.4271
8 4 12 -2.7427 0.8928
8 4 13 0.1018 -0.1405
8 4 14 1.0572 0.3833
8 4 15 2.2088 0.6924
8 4 16 1.9368 0.2240
8 4 17 -0.3719 0.3723
8 4 18 -1.1930 0.3730
8 4 19 1.1369 1.4763
8 4 20 0.6516 0.3063
8 4 21 -0.3919 -1.5416
8 4 22 -0.3988 0.8834
8 4 23 -3.0342 -0.6315
8 4 24 -0.4487 -2.9544
8 5 0 -2.5655 -0.0051
8 5 1 2.7114 -3.0287
8 5 2 -0.4792 -6.8186
8 5 3 3.1489 -1.0019
8 5 4 3.6820 -2.7085
8 5 5 -0.5302 2.8760
8 5 6 -1.9555 0.8810
8 5 7 -0.8858 3.8403
8 5 8 -3.1586 2.0682
8 5 9 -0.9368 -2.2764
8 5 10 1.1610 1.3708
8 5 11 -0.8207 1.3469
8 5 12 2.0995 2.1764
8 5 13 2.0515 -0.6398
8 5 14 2.1397 -0.5663
8 5 15 1.3563 -3.0740
8 5 16 -2.8102 -4.8176
8 5 17 -0.6190 1.4416
8 5 18 -1.2871 0.4594
8 5 19 -1.8248 1.4913
8 5 20 3.9913 3.6838
8 5 21 -0.0660 0.1871
8 5 22 -2.1794 0.5923
8 5 23 2.0708 -0.6415
8 5 24 -2.8981 -3.0534
8 6 0 -4.2496 0.0410
8 6 1 0.8143 -4.1562
8 6 2 -2.8544 -2.1036
8 6 3 0.2994 3.0381
8 6 4 -0.3940 -0.1224
8 6 5 0.8656 1.8602
8 6 6 6.2058 2.7934
8 6 7 -1.5780 0.1996
8 6 8 5.2267 -2.3063
8 6 9 1.5454 -0.0693
8 6 10 -3.4267 -1.5387
8 6 11 1.3708 -1.5834
8 6 12 -3.4411 -0.0873
8 6 13 -4.2020 0.5445
8 6 14 -1.0728 0.8423
8 6 15 0.7342 -0.1283
8 6 16 1.3265 1.4986
8 6 17 2.3234 -0.5679
8 6 18 0.4699 -2.2460
8 6 19 -0.6020 2.4182
8 6 20 1.6650 0.8451
8 6 21 -0.5550 -0.0061
8 6 22 0.5009 2.6030
8 6 23 0.0380 -0.5098
8 6 24 -1.9514 -2.3366
8 7 0 -1.8489 -0.0755
8 7 1 1.7350 3.7910
8 7 2 -1.1265 -6.3583
8 7 3 1.7723 -2.2584
8 7 4 1.8012 -3.2968
8 7 5 0.6621 -2.1571
8 7 6 -0.5787 -0.6140
8 7 7 0.2787 0.1317
8 7 8 -1.1702 3.4514
8 7 9 -2.5159 -1.8566
8 7 10 1.2794 1.3795
8 7 11 -1.8240 1.7103
8 7 12 0.0298 2.8103
8 7 13 1.5845 1.9861
8 7 14 1.0919 0.3087
8 7 15 2.4591 0.3797
8 7 16 -0.7756 -6.0317
8 7 17 0.0359 -1.8543
8 7 18 -0.1839 -0.4871
8 7 19 -2.9815 -1.3041
8 7 20 2.4088 3.8045
8 7 21 1.3925 0.9932
8 7 22 -1.1755 0.5262
8 7 23 1.5086 1.4907
8 8 0 -4.6221 0.0271
8 8 1 -0.6977 -2.4074
8 8 2 -0.7370 -2.7230
8 8 3 -3.4181 1.8104
8 8 4 0.8235 -0.7437
8 8 5 -4.6455 1.0431
8 8 6 2.8650 1.4020
8 8 7 0.2410 1.5094
8 8 8 1.7392 -1.1623
8 8 9 7.4480 0.4855
8 8 10 -0.0951 -0.6028
8 8 11 1.7481 -2.6904
8 8 12 -0.3245 0.0773
8 8 13 -4.2574 -0.0135
8 8 14 -3.9604 1.0792
8 8 15 -0.6058 -0.1196
8 8 16 -0.5530 0.6202
8 8 17 0.7495 0.4650
8 8 18 3.4075 -3.5062
8 8 19 -1.7501 0.9757
8 8 20 0.7242 1.0272
8 8 21 0.6657 -0.8247
8 8 22 0.1908 3.6811
8 8 23 2.8127 -0.0594
8 9 0 -1.3324 -0.0532
8 9 1 1.6352 6.3738
8 9 2 -1.3865 0.0444
8 9 3 1.2226 -1.9533
8 9 4 0.6357 -0.1537
8 9 5 -0.4425 -4.2221
8 9 6 0.8801 -1.5024
8 9 7 -0.1321 -3.4854
8 9 8 0.3015 0.5586
8 9 9 -2.3389 -0.9281
8 9 10 1.4763 0.6447
8 9 11 -0.6999 1.5438
8 9 12 -1.3679 1.5142
8 9 13 1.6099 3.4091
8 9 14 -1.1225 -0.0622
8 9 15 0.4640 3.4629
8 9 16 1.1558 -2.1041
8 9 17 -0.2572 -3.2673
8 9 18 1.3539 -0.1842
8 9 19 -1.0317 -3.3073
8 9 20 -0.3248 0.6379
8 9 21 0.8736 0.3644
8 9 22 -0.0297 -0.0208
8 10 0 -1.1773 -0.0030
8 10 1 -1.6625 -0.4446
8 10 2 2.0363 -2.7703
8 10 3 -4.1239 1.2820
8 10 4 1.4768 -1.3639
8 10 5 -4.0959 0.0623
8 10 6 -3.8034 0.9396
8 10 7 1.2187 0.8009
8 10 8 -2.8447 0.2563
8 10 9 5.5763 0.4840
8 10 10 4.0775 0.3400
8 10 11 2.2414 -2.3773
8 10 12 2.1363 -0.0758
8 10 13 -0.9244 -0.4546
8 10 14 -3.4194 0.4001
8 10 15 -2.1726 0.9961
8 10 16 -0.4384 0.4056
8 10 17 -1.7827 0.8525
8 10 18 2.9531 -2.5527
8 10 19 -1.1542 -1.4382
8 10 20 -1.4247 0.7995
8 10 21 0.5677 -1.6017
8 10 22 -0.3493 2.3919
8 11 0 -2.0636 0.0975
8 11 1 1.3794 2.3152
8 11 2 -0.7757 4.7594
8 11 3 -0.5470 0.5510
8 11 4 1.4095 3.3081
8 11 5 -1.6778 -2.1417
8 11 6 1.0249 -1.2763
8 11 7 0.6001 -2.8542
8 11 8 0.1680 -2.6321
8 11 9 -1.2869 -1.6184
8 11 10 0.6963 -0.8994
8 11 11 0.3048 1.4921
8 11 12 -1.7927 -1.1873
8 11 13 1.2456 3.3512
8 11 14 0.2744 0.1493
8 11 15 -1.5446 1.3534
8 11 16 0.8430 2.9635
8 11 17 -0.4562 -1.6389
8 11 18 -0.7443 0.5675
8 11 19 1.5421 -0.9530
8 11 20 -0.0630 -1.6206
8 11 21 -0.4328 -2.3579
8 12 0 0.5942 -0.0169
8 12 1 -0.3924 1.6330
8 12 2 3.6371 -2.3469
8 12 3 -1.6936 0.5375
8 12 4 0.6726 -0.1724
8 12 5 0.7469 -2.1353
8 12 6 -6.6095 1.0412
8 12 7 0.1964 0.1805
8 12 8 -3.7718 0.0486
8 12 9 -1.1030 1.0797
8 12 10 3.2269 0.7983
8 12 11 2.3133 -0.7620
8 12 12 3.6949 0.0497
8 12 13 1.2910 -1.3520
8 12 14 0.1546 -0.7320
8 12 15 -2.0611 0.3355
8 12 16 -0.5432 1.5199
8 12 17 -0.9085 2.0806
8 12 18 0.8362 -0.8436
8 12 19 -0.3237 -2.0904
8 12 20 -2.1353 -0.5085
8 13 0 -2.4462 0.0441
8 13 1 0.0513 -3.0800
8 13 2 0.9915 2.3489
8 13 3 -2.2092 2.1934
8 13 4 1.5127 4.7674
8 13 5 -0.9661 1.7646
8 13 6 -0.8940 -0.5555
8 13 7 1.5137 0.2301
8 13 8 0.2244 -1.9797
8 13 9 -0.2588 -1.7214
8 13 10 0.8884 -3.0947
8 13 11 0.4898 1.1979
8 13 12 -1.5970 -2.8028
8 13 13 -1.2354 -0.0793
8 13 14 1.4832 2.4613
8 13 15 0.1438 -2.2989
8 13 16 -0.4853 3.2492
8 13 17 1.4346 1.4495
8 13 18 -2.6756 0.0363
8 13 19 -0.6144 2.1888
8 13 20 1.7006 0.6433
8 14 0 -1.1207 -0.1722
8 14 1 -0.0106 2.6126
8 14 2 3.4240 -0.7246
8 14 3 1.7973 -1.0975
8 14 4 -0.6107 1.3887
8 14 5 4.6118 -2.8483
8 14 6 -3.6302 0.1734
8 14 7 -1.5205 0.7300
8 14 8 -1.1802 -1.0515
8 14 9 -4.9773 0.8365
8 14 10 -1.0359 0.6954
8 14 11 -0.7063 0.0466
8 14 12 3.3415 1.5941
8 14 13 1.7993 -0.7141
8 14 14 2.3747 -0.9419
8 14 15 0.9525 -1.7502
8 14 16 -1.2643 -0.0147
8 14 17 0.5373 2.9186
8 14 18 -0.2529 0.5205
8 14 19 0.7259 -0.2911
8 15 0 -1.2465 0.0226
8 15 1 -1.5804 -4.4212
8 15 2 1.4585 -2.8176
8 15 3 -1.8113 0.3698
8 15 4 0.7503 2.9346
8 15 5 0.3520 4.6684
8 15 6 -1.7957 0.4268
8 15 7 1.0933 2.2175
8 15 8 -0.2783 0.4871
8 15 9 -0.3434 0.1574
8 15 10 1.5753 -3.1044
8 15 11 1.4428 0.1047
8 15 12 0.3984 -1.0310
8 15 13 -2.2944 -4.4749
8 15 14 -0.8631 2.4714
8 15 15 0.9607 -2.3986
8 15 16 -1.9619 0.1836
8 15 17 2.8912 2.8044
8 15 18 0.5868 -0.7455
8 16 0 -2.3040 -0.1078
8 16 1 -0.5102 2.0002
8 16 2 0.7551 1.4400
8 16 3 4.2853 -1.4154
8 16 4 -0.8525 0.9043
8 16 5 4.3324 -2.2416
8 16 6 1.5718 -0.4664
8 16 7 -2.4382 0.8383
8 16 8 1.3766 -0.9939
8 16 9 -3.5945 0.7633
8 16 10 -2.5187 -0.2319
8 16 11 -3.6271 -1.5450
8 16 12 -0.0864 1.3789
8 16 13 0.9675 1.5854
8 16 14 1.2692 1.4770
8 16 15 3.4722 -1.2324
8 16 16 -0.4060 -2.1879
8 17 0 0.5092 0.0498
8 17 1 -1.5967 -2.6872
8 17 2 0.2920 -5.4581
8 17 3 -1.0096 -1.6380
8 17 4 0.7271 -1.3711
8 17 5 0.3774 4.4000
8 17 6 -1.6268 1.7926
8 17 7 1.6213 2.4894
8 17 8 -1.2215 1.5902
8 17 9 -1.8973 1.2217
8 17 10 0.7918 -0.7750
8 17 11 1.1569 -1.2982
8 17 12 2.9422 2.1902
8 17 13 1.0343 -4.1373
8 17 14 -1.4405 -0.1031
8 17 15 -0.6669 -0.6479
8 18 0 -3.9316 -0.0095
8 18 1 0.4004 0.3931
8 18 2 -2.0765 2.1357
8 18 3 3.5983 0.2775
8 18 4 1.5403 0.5572
8 18 5 1.1638 -1.6640
8 18 6 4.0813 -0.3052
8 18 7 -1.6174 0.2390
8 18 8 1.6751 -1.2848
8 18 9 -1.0439 2.1064
8 18 10 -0.6219 0.1602
8 18 11 -2.3325 -3.3399
8 18 12 -2.8026 -1.6013
8 18 13 0.1555 0.8905
8 19 0 0.7689 0.0187
8 19 1 -0.6405 0.3916
8 19 2 -0.3033 -6.3639
8 19 3 -0.5454 -1.8411
8 19 4 1.3151 -3.4183
8 19 5 0.5769 0.7197
8 19 6 -2.2085 2.1106
8 19 7 2.0630 2.1892
8 19 8 -0.2648 1.3446
8 19 9 -3.0628 0.3329
8 19 10 -0.6447 1.6478
8 19 11 -1.2142 -2.4876
8 19 12 1.9743 2.1870
8 20 0 -6.7257 -0.0762
8 20 1 -0.8379 -1.0503
8 20 2 -1.5641 0.4576
8 20 3 -0.5747 1.1229
8 20 4 4.0587 1.0678
8 20 5 -0.0534 -0.0595
8 20 6 1.7798 0.1932
8 20 7 -0.6363 -0.0032
8 20 8 1.6229 -2.1223
8 20 9 0.1707 2.0738
8 21 0 -0.3350 0.0218
8 21 1 -0.7221 4.1604
8 21 2 -0.3398 -4.2539
8 21 3 0.1065 -2.9738
8 21 4 1.5261 -1.1065
8 21 5 1.3924 -1.6184
8 21 6 -1.7378 0.1591
9 0 1 0.1311 0.3849
9 0 2 6.0718 1.4620
9 0 3 0.0706 3.5259
9 0 4 -1.0324 -0.4482
9 0 5 -0.1165 4.3025
9 0 6 1.3299 -1.2795
9 0 7 -0.0054 -1.3950
9 0 8 1.2061 0.5555
9 0 9 0.0465 -4.7676
9 0 10 -5.6799 1.1044
9 0 11 0.0049 -1.7308
9 0 12 -0.6129 -0.7853
9 0 13 0.0140 3.1868
9 0 14 2.7831 -0.8019
9 0 15 -0.0533 3.3322
9 0 16 0.2052 0.8909
9 0 17 -0.0265 -2.6141
9 0 18 0.4541 0.4853
9 0 19 0.1068 1.4055
9 0 20 0.6054 -0.8388
9 0 21 0.0095 -1.6851
9 1 0 0.4711 -9.9764
9 1 1 4.5559 -3.4661
9 1 2 2.2038 0.4993
9 1 3 -0.7605 -1.4744
9 1 4 1.0597 5.8004
9 1 5 -3.9299 1.5585
9 1 6 0.0232 -1.5391
9 1 7 -1.4833 -0.6700
9 1 8 -0.4828 1.3624
9 1 9 0.0270 0.3933
9 1 10 -0.8317 0.7531
9 1 11 -0.0552 0.8707
9 1 12 -0.4977 -0.9980
9 1 13 4.4156 0.2834
9 1 14 0.5799 -1.0543
9 1 15 0.4187 0.2840
9 1 16 2.2965 -1.7626
9 1 17 -4.8631 -1.5985
9 1 18 -0.5256 0.7621
9 1 19 -0.7326 -0.6109
9 1 20 -2.6700 3.7860
9 1 21 0.3065 1.6590
9 2 0 -0.1801 -0.9467
9 2 1 -2.7383 0.3017
9 2 2 3.9961 -1.7977
9 2 3 1.9267 3.1729
9 2 4 0.0569 -1.2669
9 2 5 -0.2775 1.9226
9 2 6 -0.0358 3.4695
9 2 7 1.8581 -2.2721
9 2 8 0.6248 3.6678
9 2 9 2.6311 -1.8772
9 2 10 -2.6314 -2.7942
9 2 11 -2.6487 -0.6727
9 2 12 -0.6166 -2.7077
9 2 13 -1.6214 0.8372
9 2 14 1.3394 1.2996
9 2 15 0.7041 2.1138
9 2 16 0.4967 1.0400
9 2 17 -0.4868 -1.2705
9 2 18 0.1573 0.4078
9 2 19 0.9727 1.6305
9 2 20 0.2195 1.7095
9 2 21 1.0785 -1.1758
9 3 0 0.0588 -2.7738
9 3 1 0.4320 -5.5431
9 3 2 4.2060 -0.3838
9 3 3 -0.3118 -4.0029
9 3 4 3.4084 2.1499
9 3 5 -1.1350 1.9413
9 3 6 -0.6757 -0.5503
9 3 7 -0.2240 0.2905
9 3 8 -2.0257 -0.1218
9 3 9 0.3266 1.1775
9 3 10 -0.6983 0.5272
9 3 11 -0.0401 0.5249
9 3 12 -1.1274 -0.1843
9 3 13 2.0347 0.5699
9 3 14 0.3213 -0.4350
9 3 15 -0.8038 1.4410
9 3 16 4.6871 0.2962
9 3 17 -0.6014 -3.5314
9 3 18 -0.2280 -0.3732
9 3 19 1.2666 -1.4943
9 3 20 -4.8438 1.2434
9 4 0 -0.0746 -1.2149
9 4 1 -2.9043 1.3737
9 4 2 0.9634 -2.5539
9 4 3 0.8581 0.0009
9 4 4 -0.9035 -0.1844
9 4 5 1.4663 -3.3077
9 4 6 -1.5616 4.6239
9 4 7 1.7993 -0.8397
9 4 8 1.7207 1.9861
9 4 9 1.5072 2.6424
9 4 10 1.7293 -2.9589
9 4 11 -2.1167 -0.4015
9 4 12 -1.2823 -1.2648
9 4 13 -1.0092 -1.5962
9 4 14 -0.3470 0.3470
9 4 15 -0.0477 0.8557
9 4 16 0.6459 -0.4404
9 4 17 -0.5558 -0.1087
9 4 18 -0.3497 1.0577
9 4 19 1.5994 0.2132
9 4 20 0.0690 2.7723
9 5 0 0.2499 2.3207
9 5 1 -3.2179 -2.4836
9 5 2 1.1966 0.9464
9 5 3 -0.8598 -2.9376
9 5 4 2.1441 -1.3210
9 5 5 2.8766 0.9820
9 5 6 -0.3752 -2.5194
9 5 7 1.1234 0.5097
9 5 8 -2.2947 -0.5988
9 5 9 -0.3884 0.5447
9 5 10 -0.4192 2.0618
9 5 11 1.4506 0.1889
9 5 12 -0.4739 -0.2811
9 5 13 -1.1454 0.0748
9 5 14 0.1650 -0.7033
9 5 15 -2.9632 1.5244
9 5 16 2.6987 3.0635
9 5 17 3.3596 -2.3064
9 5 18 0.3168 -1.1723
9 5 19 3.0435 -1.6817
9 5 20 -2.5559 -1.6844
9 6 0 -0.0099 -0.5093
9 6 1 -0.9412 1.5341
9 6 2 -0.4759 0.4472
9 6 3 0.7078 -2.4804
9 6 4 -3.3731 1.1626
9 6 5 0.4484 -5.4060
9 6 6 -0.7253 0.6637
9 6 7 -1.2873 1.6062
9 6 8 2.9342 -1.1067
9 6 9 1.1202 3.7003
9 6 10 2.8552 -0.6353
9 6 11 0.4736 -0.1009
9 6 12 -1.4920 0.4835
9 6 13 -0.2516 -0.9791
9 6 14 -0.5517 -1.1811
9 6 15 -0.6802 -0.6928
9 6 16 0.5375 -0.9116
9 6 17 -0.5429 -0.6726
9 6 18 -0.9486 1.9984
9 6 19 1.6113 -1.0121
9 7 0 0.2910 2.3594
9 7 1 -2.2658 0.9599
9 7 2 -2.8046 1.7124
9 7 3 -1.4359 1.3960
9 7 4 -1.7996 -2.1537
9 7 5 3.2913 1.0124
9 7 6 0.5155 -2.5190
9 7 7 2.2465 -2.3066
9 7 8 -0.9689 -0.8650
9 7 9 -0.6673 -1.1641
9 7 10 -0.6025 1.9098
9 7 11 0.6958 1.3871
9 7 12 1.9472 0.5288
9 7 13 -2.9407 -0.5749
9 7 14 0.2441 -1.2449
9 7 15 -2.0697 -0.3303
9 7 16 -1.6732 3.1267
9 7 17 3.7423 0.3730
9 7 18 -0.0621 0.0830
9 7 19 2.1316 -0.3151
9 8 0 -0.0421 1.0111
9 8 1 1.6362 0.0926
9 8 2 -0.5653 3.0172
9 8 3 0.4717 -1.7523
9 8 4 -1.8393 1.3175
9 8 5 -2.6119 -1.9953
9 8 6 0.3093 -3.8338
9 8 7 -2.8504 2.1076
9 8 8 0.4418 -3.0257
9 8 9 1.3608 1.6557
9 8 10 2.1127 1.6573
9 8 11 1.6447 0.4878
9 8 12 -0.2272 1.7731
9 8 13 0.6474 0.1135
9 8 14 -0.7153 -1.5089
9 8 15 -0.6337 -2.1389
9 8 16 0.4199 -0.1156
9 8 17 0.0361 -0.8704
9 8 18 -1.3031 1.9558
9 8 19 1.5025 0.4002
9 9 0 -0.0355 -1.4353
9 9 1 0.9036 3.3261
9 9 2 -3.8079 0.5265
9 9 3 -0.5808 3.7542
9 9 4 -3.5770 0.6322
9 9 5 0.4981 -0.1220
9 9 6 -0.0334 0.3194
9 9 7 1.3010 -2.8449
9 9 8 1.1669 -1.8429
9 9 9 -0.3211 -1.5659
9 9 10 1.3656 0.1846
9 9 11 -1.5081 0.6079
9 9 12 1.9247 1.7874
9 9 13 -1.8473 -0.4936
9 9 14 -1.5158 -0.7724
9 9 15 1.1888 -1.1507
9 9 16 -2.6995 0.0731
9 9 17 1.2906 1.2735
9 9 18 -0.2379 0.5728
9 10 0 0.0327 2.8241
9 10 1 2.4660 -0.9061
9 10 2 1.8362 2.2865
9 10 3 -1.1102 0.2805
9 10 4 0.6496 -0.6272
9 10 5 -2.3527 3.2866
9 10 6 -0.7204 -3.9212
9 10 7 -1.4786 1.0843
9 10 8 -1.1553 -2.4274
9 10 9 0.1949 -2.4797
9 10 10 0.5523 2.2972
9 10 11 0.6808 0.5547
9 10 12 -0.4323 2.5775
9 10 13 2.0658 1.7293
9 10 14 -0.2636 -0.9914
9 10 15 -0.0664 -2.4331
9 10 16 0.0612 -0.3869
9 10 17 -0.0896 -0.2397
9 11 0 0.0060 -5.9148
9 11 1 2.6884 2.1471
9 11 2 -2.4564 0.2340
9 11 3 0.5021 1.1284
9 11 4 -1.5769 4.1000
9 11 5 -1.3884 0.1039
9 11 6 -0.1988 0.6339
9 11 7 -1.7337 -0.6517
9 11 8 1.5201 -1.7049
9 11 9 -0.4620 -1.5855
9 11 10 3.0506 0.6831
9 11 11 -0.2441 -0.3001
9 11 12 -0.3585 1.0163
9 11 13 0.9409 -0.4297
9 11 14 -3.1835 -1.0062
9 11 15 1.2370 0.5498
9 11 16 0.1645 -2.1293
9 12 0 0.0551 3.1392
9 12 1 0.2061 0.0407
9 12 2 3.2351 0.0516
9 12 3 -0.3311 1.9295
9 12 4 0.5844 -3.2358
9 12 5 0.2975 4.2188
9 12 6 -0.9108 -0.3120
9 12 7 -1.3671 -0.3363
9 12 8 -0.4944 0.9442
9 12 9 0.9314 -4.5567
9 12 10 -0.8914 0.3200
9 12 11 -0.0604 0.0026
9 12 12 -2.3014 0.7851
9 12 13 0.5914 2.9018
9 12 14 0.6067 0.4812
9 12 15 0.9647 -0.4953
9 13 0 0.0449 -4.8009
9 13 1 2.3602 -1.7162
9 13 2 -0.3091 0.7130
9 13 3 0.2591 -2.4436
9 13 4 1.1098 2.5713
9 13 5 -1.4200 2.5048
9 13 6 0.6097 0.4044
9 13 7 -2.7766 0.0208
9 13 8 -0.1085 -0.0051
9 13 9 -0.8905 -2.0691
9 13 10 1.4288 0.5674
9 13 11 2.3603 1.9538
9 13 12 -1.6238 0.5012
9 13 13 2.5260 -0.1046
9 13 14 -1.1001 -2.3392
9 14 0 0.0036 0.7422
9 14 1 -1.3756 1.3619
9 14 2 0.5560 -1.3920
9 14 3 0.5842 2.6851
9 14 4 0.1914 -2.4100
9 14 5 1.2586 0.7487
9 14 6 1.2009 2.5623
9 14 7 -0.7093 -1.3929
9 14 8 -1.7460 2.4765
9 14 9 2.5809 -2.3015
9 14 10 -0.2463 -1.3946
9 14 11 0.0493 0.0619
9 14 12 -1.3485 -1.9086
9 14 13 -2.7162 1.3925
9 15 0 -0.0225 -0.2235
9 15 1 0.4918 -2.7043
9 15 2 1.7104 0.7034
9 15 3 -0.0284 -2.5162
9 15 4 2.4269 -1.3185
9 15 5 -0.1856 1.6302
9 15 6 0.0262 1.2962
9 15 7 -1.7275 -0.1243
9 15 8 -1.3255 0.8359
9 15 9 -1.1302 -0.7445
9 15 10 -1.0496 -1.9822
9 15 11 3.3714 2.7291
9 16 0 0.0425 -2.3166
9 16 1 -0.4579 0.7649
9 16 2 -0.5389 -2.0294
9 16 3 -0.8039 1.1769
9 16 4 -0.6912 1.6580
9 16 5 0.3708 -1.5000
9 16 6 1.2219 2.9829
9 16 7 2.3821 -0.1931
9 16 8 -2.0029 0.6449
9 16 9 1.1382 -0.5089
9 16 10 1.4774 -1.4965
9 17 0 0.0254 0.9123
9 17 1 -1.9135 -1.9081
9 17 2 2.1850 0.8136
9 17 3 0.5655 -1.0632
9 17 4 2.6336 -1.2366
9 17 5 2.3298 -0.5521
9 17 6 -0.7773 -0.1138
9 17 7 -0.9163 0.3646
9 18 0 0.0524 -2.7882
9 18 1 -0.7911 -1.6521
9 18 2 1.3254 -2.0364
9 18 3 0.1713 -2.4590
10 0 0 1.5210 -0.7812
10 0 1 0.2383 -3.6812
10 0 2 -0.5787 0.0844
10 0 3 -0.3125 3.3867
10 0 4 1.4386 1.0077
10 0 5 -0.1709 -2.1856
10 0 6 1.3703 -0.3757
10 0 7 0.3757 1.8568
10 0 8 -3.9260 -1.0327
10 0 9 0.0803 4.5040
10 0 10 1.0553 0.6072
10 0 11 -0.4194 -4.1783
10 0 12 1.3169 0.7712
10 0 13 0.0575 -0.2945
10 0 14 -1.0670 -0.6994
10 0 15 0.3951 1.2262
10 1 0 -5.5321 0.0731
10 1 1 6.0524 -0.6882
10 1 2 0.4984 2.3821
10 1 3 2.5489 0.3425
10 1 4 2.8407 -2.0074
10 1 5 -2.8609 -0.7602
10 1 6 -1.5272 1.5560
10 1 7 2.0925 0.1801
10 1 8 0.9396 2.0414
10 1 9 -0.7822 0.2429
10 1 10 0.7843 -2.0007
10 1 11 -1.2514 0.9225
10 1 12 -1.0494 -0.7781
10 1 13 -0.3412 0.1253
10 1 14 0.1113 1.3210
10 1 15 -1.9338 -2.0075
10 2 0 2.0289 -0.3311
10 2 1 -0.3090 -1.3536
10 2 2 -0.6131 -4.4464
10 2 3 -1.3464 0.2174
10 2 4 -0.5188 0.4684
10 2 5 2.0487 0.1469
10 2 6 1.7936 -1.3015
10 2 7 1.7457 1.4043
10 2 8 -1.9131 -0.7034
10 2 9 -1.2904 0.6771
10 2 10 -0.3480 4.2557
10 2 11 0.7126 -1.2633
10 2 12 1.7055 -1.1745
10 2 13 -0.5856 0.8153
10 2 14 -0.4481 -2.0879
10 2 15 -0.3633 -1.3151
10 3 0 -8.3754 0.1936
10 3 1 -1.2220 -1.0617
10 3 2 -0.7109 1.0617
10 3 3 -0.5042 0.6739
10 3 4 4.9880 -1.5785
10 3 5 0.2813 -1.2917
10 3 6 0.2810 0.1733
10 3 7 -0.5895 -0.5693
10 3 8 0.2893 1.3888
10 3 9 0.2915 1.1523
10 3 10 -0.2662 -2.2220
10 3 11 0.2413 2.3298
10 3 12 0.0944 -0.1769
10 3 13 -1.6725 -1.1211
10 3 14 -0.3721 3.0974
10 3 15 -0.3827 -3.0116
10 4 0 2.6637 0.0965
10 4 1 -0.0248 2.5220
10 4 2 -1.3247 -2.7595
10 4 3 -0.7272 -1.2889
10 4 4 -2.8661 -2.8699
10 4 5 0.7037 0.4804
10 4 6 2.1993 0.4107
10 4 7 1.6053 -1.8914
10 4 8 0.6552 2.1942
10 4 9 0.1723 -1.2502
10 4 10 -1.3840 1.5865
10 4 11 -0.3869 2.7861
10 4 12 1.6799 -1.1840
10 4 13 -0.6783 -0.0955
10 4 14 0.3508 0.0921
10 5 0 -2.3100 0.1637
10 5 1 -4.4297 0.1207
10 5 2 -1.3555 0.1561
10 5 3 -4.0238 0.3349
10 5 4 3.0204 -1.5965
10 5 5 -0.3204 -1.0204
10 5 6 2.0063 -0.1187
10 5 7 1.0277 -0.7339
10 5 8 -1.1345 -0.5414
10 5 9 2.0292 1.3928
10 5 10 -1.1312 -1.6167
10 5 11 -1.5733 0.8448
10 5 12 0.6931 1.6046
10 5 13 -0.3908 -1.6235
10 5 14 -1.0506 1.6113
10 6 0 2.1600 0.0134
10 6 1 1.1114 3.6108
10 6 2 -1.8292 -0.4433
10 6 3 -0.1989 -0.0519
10 6 4 -2.4180 -0.9830
10 6 5 -1.9364 -2.1705
10 6 6 1.6623 2.6052
10 6 7 0.7384 -4.1053
10 6 8 1.4378 0.7502
10 6 9 0.9802 0.9115
10 6 10 -0.9527 -0.5005
10 6 11 -0.6138 3.4792
10 6 12 -0.2559 0.3609
10 6 13 -0.7640 -1.5267
10 7 0 3.0478 0.0571
10 7 1 -4.0538 1.1042
10 7 2 0.8930 0.2870
10 7 3 -4.0633 0.8233
10 7 4 0.1366 -1.4914
10 7 5 -0.1445 -1.3070
10 7 6 -1.2828 -0.5563
10 7 7 2.0259 0.2249
10 7 8 -0.2607 -0.2981
10 7 9 2.9791 0.2866
10 7 10 0.0995 0.8324
10 7 11 -1.6948 -1.4192
10 7 12 -2.0961 -0.0766
10 7 13 -0.9000 1.0072
10 8 0 -0.5773 0.0382
10 8 1 1.6363 2.7049
10 8 2 -0.7007 1.9514
10 8 3 -0.6206 -2.1410
10 8 4 0.0837 2.9053
10 8 5 -3.3277 -1.9048
10 8 6 0.6254 1.4084
10 8 7 0.4079 -1.4541
10 8 8 1.3366 -1.9010
10 8 9 1.5366 0.6741
10 8 10 -1.9700 -0.1703
10 8 11 0.0282 3.3297
10 8 12 -1.1663 0.5628
10 9 0 6.3728 0.0681
10 9 1 -1.9966 1.3644
10 9 2 1.4959 -1.0583
10 9 3 0.1327 1.2287
10 9 4 -3.3981 0.2729
10 9 5 1.4553 -1.2601
10 9 6 -2.1601 -0.8882
10 9 7 -0.4547 -0.8022
10 9 8 0.7314 1.4665
10 9 9 3.3643 -0.1103
10 9 10 0.2954 2.3213
10 9 11 0.3634 0.6506
10 10 0 -3.4667 0.0271
10 10 1 -0.9888 -0.8419
10 10 2 1.0926 4.4647
10 10 3 -1.6780 -2.3353
10 10 4 2.5154 1.9895
10 10 5 -1.7979 1.4633
10 10 6 -0.8126 -1.8150
10 10 7 0.9551 0.1983
10 10 8 0.3536 -1.2344
10 10 9 2.6233 -0.0328
10 10 10 -1.7256 -0.2151
10 11 0 4.0067 0.0570
10 11 1 2.4693 2.6240
10 11 2 -0.0154 -2.5142
10 11 3 4.7557 -1.3351
10 11 4 -3.1261 1.7577
10 11 5 -0.6037 -0.6825
10 11 6 -0.6030 0.1435
10 11 7 -2.0548 -1.8706
10 11 8 0.3951 1.0257
10 12 0 -1.5305 -0.0239
10 12 1 -4.4043 -3.9081
10 12 2 1.1371 1.2440
10 12 3 -2.6795 0.5197
10 12 4 1.5482 -0.1118
10 12 5 1.2749 4.0846
10 12 6 -1.2150 -1.8510
10 13 0 -3.5139 0.0194
10 13 1 3.2518 3.4212
10 13 2 -0.9026 -0.6746
10 13 3 4.6528 -3.5230
11 0 1 0.4441 2.5610
11 0 2 -0.4879 -0.8816
11 0 3 0.3337 -1.9362
11 1 0 -0.3252 -2.2319
11 1 1 0.4145 -1.9574
11 1 2 0.8355 -1.5490
11 1 3 -2.3053 -1.3549
11 2 0 -0.3063 -0.4379
11 2 1 -1.7815 1.8060
11 2 2 -0.9948 0.8894
0 0 0 0.0 0.0
;
loop_
_refln_index_h
_refln_index_k
_refln_index_l
_refln_F_squared_meas
_refln_F_squared_sigma
-1 0 0 -0.14 0.13
-1 0 0 -0.07 0.11
-1 0 0 0.2 0.12
-1 0 0 0 0.11
-1 0 0 -0.05 0.11
-1 0 0 0.12 0.15
-1 0 0 -0.01 0.12
1 0 0 0.04 0.14
1 0 0 -0.03 0.12
1 0 0 0.09 0.13
1 0 0 0.07 0.13
1 0 0 0.1 0.12
1 0 0 0.06 0.13
1 0 0 -0.12 0.11
-2 0 0 853.65 48.96
-2 0 0 860.23 48.98
-2 0 0 840.23 49.01
-2 0 0 886.88 48.97
-2 0 0 850.46 48.95
-2 0 0 838.78 48.98
-2 0 0 879.08 48.99
2 0 0 825.72 47.72
2 0 0 846.43 47.74
2 0 0 840.4 47.77
2 0 0 829.25 47.72
2 0 0 826.5 47.71
2 0 0 846.51 47.74
2 0 0 842.78 47.74
-3 0 0 0.07 0.53
-3 0 0 0.6 0.47
-3 0 0 0.79 0.56
-3 0 0 0.83 0.55
-3 0 0 0.08 0.45
-3 0 0 1.23 0.59
-3 0 0 1.05 0.56
3 0 0 1.36 0.41
3 0 0 -0.2 0.45
3 0 0 0.07 0.38
3 0 0 -0.06 0.42
3 0 0 0.06 0.37
3 0 0 0.55 0.46
3 0 0 0.63 0.44
-4 0 0 100.72 5.99
-4 0 0 97.28 5.94
-4 0 0 98.2 5.9
-4 0 0 93.15 5.88
-4 0 0 98.21 6.01
-4 0 0 96.63 5.91
-4 0 0 100.05 5.9
-5 0 0 -0.23 0.69
-5 0 0 0.47 0.98
-5 0 0 1.98 0.83
-5 0 0 1.49 0.99
-5 0 0 0.57 0.87
-5 0 0 0.21 0.73
-5 0 0 1.05 0.79
-6 0 0 31.13 2.63
-6 0 0 31.79 2.73
-6 0 0 34.69 2.63
-6 0 0 38.01 2.64
-6 0 0 32.63 2.51
-6 0 0 29.24 2.49
-6 0 0 32.27 2.5
6 0 0 26.47 2.13
-7 0 0 0.3 1.33
-7 0 0 2.37 1.1
-7 0 0 0.44 1.03
-7 0 0 0.32 1.16
-7 0 0 1.43 1.13
-7 0 0 0.77 1.39
-7 0 0 1.63 1.21
7 0 0 0.33 0.92
7 0 0 0.81 0.88
7 0 0 -0.77 0.8
-8 0 0 14.88 1.95
-8 0 0 10.65 2.05
-8 0 0 15.97 2.26
-8 0 0 11.65 2.09
-8 0 0 13.24 1.96
-8 0 0 11.6 1.85
-8 0 0 11.41 1.81
8 0 0 9.43 1.58
8 0 0 11.95 1.6
8 0 0 11.51 1.71
-9 0 0 1.33 1.6
-9 0 0 0.97 1.43
-9 0 0 -0.9 1.42
-9 0 0 0.53 1.67
-9 0 0 0.59 1.52
9 0 0 -0.04 1.23
9 0 0 0.56 0.93
9 0 0 -1.57 1.07
9 0 0 -0.51 1.14
9 0 0 0.36 1.42
-10 0 0 7.77 2.27
-10 0 0 8.63 2.06
-10 0 0 3.5 1.84
-10 0 0 6.26 2.33
-10 0 0 3.93 1.8
10 0 0 5.48 1.75
10 0 0 7.03 1.58
10 0 0 4.19 1.45
10 0 0 7.1 1.64
10 0 0 2.41 1.43
10 0 0 5.29 2.02
-11 0 0 -0.5 1.8
-11 0 0 -0.6 2.09
-11 0 0 -2.99 1.85
11 0 0 2.97 1.79
11 0 0 -0.11 1.27
11 0 0 -1.83 1.88
11 0 0 -0.4 1.16
11 0 0 -0.33 1.4
11 0 0 -1.01 1.47
11 0 0 1.26 1.32
-12 0 0 5.71 2.38
12 0 0 5.57 1.75
12 0 0 9.03 2.41
12 0 0 4.2 1.63
12 0 0 2.67 1.59
12 0 0 2.88 1.79
12 0 0 7.68 4.24
12 0 0 4.93 1.83
12 -1 0 9.59 2.06
12 -1 0 6.41 1.85
12 -1 0 10.54 2.04
12 -1 0 10.05 2.85
12 -1 0 5.26 1.94
12 -1 0 5.33 1.74
12 -1 0 7.94 2.35
11 -1 0 -1.42 1.41
11 -1 0 -0.57 1.63
11 -1 0 -1.57 1.96
11 -1 0 -1.36 1.17
11 -1 0 0.9 1.34
11 -1 0 -1.11 1.46
11 -1 0 -0.07 1.25
-11 1 0 1.22 1.88
-11 1 0 0.72 1.94
-11 1 0 -1.29 1.97
10 -1 0 0.92 1.48
10 -1 0 0.65 1.22
10 -1 0 0.22 1.1
10 -1 0 -0.16 1.21
10 -1 0 0.4 1.39
10 -1 0 1.49 1.29
10 -1 0 -2.36 1.43
-10 1 0 -2.12 1.53
-10 1 0 -0.86 1.85
-10 1 0 -2.06 2.13
-10 1 0 0.92 1.64
-10 1 0 1.42 1.83
9 -1 0 1.88 0.99
9 -1 0 -0.01 1.1
9 -1 0 -0.26 1.06
9 -1 0 1.36 1.63
9 -1 0 -0.24 1
-9 1 0 3.43 1.69
-9 1 0 2.42 1.49
-9 1 0 3.71 1.57
-9 1 0 3.6 1.51
-9 1 0 2.34 1.85
-9 1 0 3.77 2.11
-9 1 0 -0.31 1.75
8 -1 0 47.76 3.62
8 -1 0 50.86 3.72
8 -1 0 56.52 3.87
-8 1 0 56.54 4.42
-8 1 0 55.83 4.26
-8 1 0 57.38 4.24
-8 1 0 58.83 4.12
-8 1 0 59.78 4.38
-8 1 0 56.37 4.13
-8 1 0 54.16 4.13
-7 1 0 0.76 1.06
-7 1 0 2.5 1.29
-7 1 0 1.19 1.31
-7 1 0 0.6 1.05
-7 1 0 0.54 1.21
-7 1 0 0.08 1.14
-7 1 0 0.63 1.16
-6 1 0 3.92 1.24
-6 1 0 3.75 1.07
-6 1 0 1.55 1.04
-6 1 0 3.2 1.19
-6 1 0 3.43 1.06
-6 1 0 2.78 1.01
-6 1 0 2.24 1.22
-5 1 0 44.59 3.13
-5 1 0 45.27 3.31
-5 1 0 46.38 3.23
-5 1 0 40.17 3.08
-5 1 0 50.06 3.25
-5 1 0 47.02 3.15
-5 1 0 54.08 3.22
-4 1 0 27.65 2.03
-4 1 0 27.33 1.97
-4 1 0 27.25 2.17
-4 1 0 27.2 2.07
-4 1 0 26.05 1.93
-4 1 0 28.09 1.94
-4 1 0 24.3 1.91
3 -1 0 57.31 3.08
3 -1 0 40.18 2.97
3 -1 0 46.52 3.01
3 -1 0 49.18 2.99
3 -1 0 46.25 3.04
3 -1 0 52.03 2.98
3 -1 0 51.53 3.13
-3 1 0 53.01 3.09
-3 1 0 56.88 3.04
-3 1 0 46.34 3.11
-3 1 0 42.76 3.03
-3 1 0 46.35 3.02
-3 1 0 43.04 3.01
-3 1 0 50.53 3.01
2 -1 0 357.08 20.35
2 -1 0 344.65 20.36
2 -1 0 351.97 20.33
2 -1 0 373.71 20.33
2 -1 0 352.72 20.35
2 -1 0 354.38 20.4
2 -1 0 351.88 20.36
-2 1 0 372.28 20.45
-2 1 0 351.24 20.47
-2 1 0 348.69 20.43
-2 1 0 352.58 20.45
-2 1 0 360.05 20.47
-2 1 0 357.29 20.51
-2 1 0 355.82 20.43
1 -1 0 212.21 12.21
1 -1 0 218.41 12.18
1 -1 0 207.35 12.19
1 -1 0 211.33 12.18
1 -1 0 213.33 12.16
1 -1 0 212.74 12.17
1 -1 0 214.72 12.19
-1 1 0 178.6 10.59
-1 1 0 178.49 10.61
-1 1 0 181.93 10.6
-1 1 0 190.42 10.57
-1 1 0 187.76 10.58
-1 1 0 188.57 10.59
-1 1 0 187.48 10.59
0 -1 0 -0.02 0.02
0 -1 0 0.03 0.02
0 -1 0 -0.03 0.02
0 -1 0 0 0.01
0 -1 0 0.06 0.02
0 -1 0 0.04 0.04
0 1 0 -0.02 0.03
0 1 0 0.03 0.02
0 1 0 0 0.03
0 1 0 0 0.02
0 1 0 0.06 0.02
0 1 0 0 0.01
-1 -1 0 175.86 10.24
-1 -1 0 168.64 10.24
-1 -1 0 166.4 10.24
-1 -1 0 188.73 10.25
-1 -1 0 194.82 10.26
1 1 0 189.71 11.82
1 1 0 210.67 11.77
1 1 0 207.23 11.77
1 1 0 183.96 11.77
1 1 0 218.3 11.77
1 1 0 209.22 11.77
1 1 0 210.88 11.78
1 1 0 211.43 11.76
1 1 0 210.15 11.78
-2 -1 0 355.25 20.47
-2 -1 0 361.55 20.46
-2 -1 0 358.04 20.47
-2 -1 0 351.56 20.46
-2 -1 0 357.17 20.5
-2 -1 0 352.14 20.48
-2 -1 0 364.17 20.46
2 1 0 356.71 20.17
2 1 0 361.64 20.18
2 1 0 357.02 20.16
2 1 0 341.91 20.17
2 1 0 344.09 20.2
2 1 0 357.64 20.18
2 1 0 343.74 20.15
2 1 0 354.26 20.19
-3 -1 0 53.03 2.97
-3 -1 0 42.36 2.94
-3 -1 0 46.7 2.97
-3 -1 0 44.36 3.01
-3 -1 0 44.48 2.93
-3 -1 0 52.56 3.02
3 1 0 48.62 3.01
3 1 0 52.06 2.96
3 1 0 51.79 3.02
3 1 0 51.12 2.98
3 1 0 41.84 2.94
3 1 0 42.53 2.97
3 1 0 50.11 3.07
-4 -1 0 25.43 2.05
-4 -1 0 28.45 2.03
-4 -1 0 25.83 2.1
-4 -1 0 28.93 2.05
-4 -1 0 29.34 2.01
-4 -1 0 29.79 2.02
-4 -1 0 26.63 2.03
4 1 0 24.7 1.81
-5 -1 0 47.36 3.09
-5 -1 0 42.75 3.01
-5 -1 0 42.35 3.24
-5 -1 0 38.93 3.01
-5 -1 0 44.09 3
-5 -1 0 48.78 3.15
-5 -1 0 47.12 3.15
5 1 0 42.02 2.85
-6 -1 0 0.92 0.9
-6 -1 0 3.8 1.12
-6 -1 0 1.4 1.1
-6 -1 0 2.69 1.11
-6 -1 0 3.45 1.24
-6 -1 0 2.56 1.14
-6 -1 0 1.77 0.99
6 1 0 0.13 0.76
6 1 0 -0.4 0.66
6 1 0 1.33 0.8
-7 -1 0 -0.2 1.22
-7 -1 0 1.84 1.13
-7 -1 0 1.6 1.21
-7 -1 0 3.49 1.55
-7 -1 0 1.85 1.17
-7 -1 0 -0.66 1.21
-7 -1 0 2.29 1.26
7 1 0 0.96 0.88
7 1 0 -0.13 0.77
7 1 0 0.09 0.91
-8 -1 0 54.73 4.1
-8 -1 0 55.48 4.02
-8 -1 0 51.75 4.07
-8 -1 0 52.08 3.94
-8 -1 0 55.91 4.4
8 1 0 45.59 3.55
8 1 0 52.14 3.66
8 1 0 46.38 3.52
-9 -1 0 3.73 1.74
-9 -1 0 2.52 1.62
-9 -1 0 3.86 1.9
-9 -1 0 2.27 1.69
-9 -1 0 3.11 1.52
9 1 0 0.16 1.06
9 1 0 -1.18 1.18
9 1 0 1.5 1
9 1 0 2.81 1.43
9 1 0 -0.55 1.1
-10 -1 0 1.62 1.9
-10 -1 0 2.2 1.69
-10 -1 0 0.53 1.63
10 1 0 1.11 1.23
10 1 0 -0.83 1
10 1 0 -0.67 1.1
10 1 0 -1.79 1.59
10 1 0 0.22 1.29
-11 -1 0 1.5 2.15
-11 -1 0 2.02 1.9
-11 -1 0 0.45 1.86
11 1 0 0.18 1.2
11 1 0 0.01 1.35
11 1 0 1.26 1.41
11 1 0 1.51 1.63
11 1 0 -0.36 1.81
11 1 0 0.2 1.27
11 1 0 0.38 1.4
-12 -1 0 7.68 2.61
-12 -1 0 6.84 2.65
-12 -1 0 12.25 3
12 1 0 4.17 1.9
12 1 0 8.26 2.24
12 1 0 8.79 1.88
12 1 0 11.37 2.16
12 1 0 9.06 1.99
12 -2 0 1.1 1.75
12 -2 0 2.03 1.66
12 -2 0 2.3 1.69
12 -2 0 3.56 2.56
12 -2 0 1.33 1.65
12 -2 0 1.99 2.08
12 -2 0 1.59 1.51
11 -2 0 1.57 1.62
11 -2 0 2.38 1.4
11 -2 0 0.8 1.39
11 -2 0 -0.22 1.38
11 -2 0 -0.52 1.73
11 -2 0 -1.4 2.06
11 -2 0 1.2 1.43
-11 2 0 -0.9 1.81
10 -2 0 7.97 1.55
10 -2 0 5.72 1.53
10 -2 0 10.31 2.4
10 -2 0 4.04 1.48
10 -2 0 7.43 1.97
10 -2 0 7.56 1.53
10 -2 0 10 1.8
-10 2 0 10.19 2.59
-10 2 0 8.97 2.41
-10 2 0 13.39 2.45
-10 2 0 5.66 1.95
-10 2 0 7.77 2.05
-10 2 0 6.7 2.22
-10 2 0 9.84 2.07
9 -2 0 -0.59 1.08
9 -2 0 0.51 1.35
9 -2 0 1.07 1.08
9 -2 0 -0.68 0.84
9 -2 0 -1.45 0.96
9 -2 0 2.13 1.19
9 -2 0 0.8 1.4
-9 2 0 0.08 1.44
-9 2 0 2.08 1.93
-9 2 0 1.46 1.68
-9 2 0 -0.88 1.84
-9 2 0 0.36 1.58
-9 2 0 -0.05 1.52
-9 2 0 1.77 1.42
8 -2 0 2.97 1.19
8 -2 0 2.7 1.11
-8 2 0 3.91 1.4
-8 2 0 4.39 1.44
-8 2 0 3.09 1.76
-8 2 0 5.94 1.75
-8 2 0 6.13 1.65
-8 2 0 5.95 1.49
-8 2 0 3.61 1.57
-7 2 0 0.75 1.29
-7 2 0 1.84 1.12
-7 2 0 0.81 1.02
-7 2 0 1.12 1.17
-7 2 0 -0.27 1.01
-7 2 0 -0.87 1.24
-7 2 0 0.48 1.05
-6 2 0 20.61 2.07
-6 2 0 15.43 1.93
-6 2 0 16.71 1.93
-6 2 0 18.3 2.12
-6 2 0 16.66 1.86
-6 2 0 24.72 2.05
-6 2 0 25 1.92
-5 2 0 0.12 0.71
-5 2 0 -0.48 0.71
-5 2 0 0.63 0.77
-5 2 0 0.21 0.85
-5 2 0 0.56 0.74
-5 2 0 0.61 0.99
-5 2 0 0.77 0.89
-4 2 0 50.42 3.48
-4 2 0 53.7 3.58
-4 2 0 59.11 3.49
-4 2 0 54.78 3.51
-4 2 0 53.14 3.4
-4 2 0 52.62 3.43
-4 2 0 52.93 3.44
3 -2 0 200.97 11.2
3 -2 0 192.44 11.18
3 -2 0 192.04 11.14
3 -2 0 190.24 11.24
3 -2 0 197.27 11.13
3 -2 0 189.07 11.16
3 -2 0 184.74 11.18
-3 2 0 192.22 11.28
-3 2 0 189.86 11.23
-3 2 0 194.05 11.27
-3 2 0 187.6 11.2
-3 2 0 197.94 11.22
-3 2 0 191.76 11.23
-3 2 0 199.76 11.34
2 -2 0 91.23 5.53
2 -2 0 95.13 5.47
2 -2 0 85.48 5.48
2 -2 0 92.62 5.44
2 -2 0 101.06 5.47
2 -2 0 93.71 5.43
2 -2 0 93.39 5.48
-2 2 0 99.28 5.48
-2 2 0 89.88 5.5
-2 2 0 90.94 5.46
-2 2 0 94.86 5.51
-2 2 0 93.85 5.48
-2 2 0 87.3 5.53
-2 2 0 95.43 5.45
1 -2 0 12.48 0.85
1 -2 0 12.22 0.76
1 -2 0 12.34 0.91
1 -2 0 12.07 0.94
1 -2 0 11.63 0.82
1 -2 0 12.16 0.78
1 -2 0 11.71 0.75
1 -2 0 11.05 0.79
1 -2 0 12.12 0.78
1 -2 0 11.83 0.8
-1 2 0 13.1 0.79
-1 2 0 12.87 0.79
-1 2 0 11.57 0.79
-1 2 0 11.04 0.93
-1 2 0 12.24 0.86
-1 2 0 11.56 0.81
-1 2 0 11.99 0.85
-1 2 0 13.54 0.79
0 -2 0 -0.05 0.08
0 -2 0 0.02 0.07
0 -2 0 0.07 0.18
0 -2 0 0 0.04
0 -2 0 -0.03 0.12
0 -2 0 0.11 0.07
0 -2 0 0.02 0.08
0 2 0 -0.01 0.07
0 2 0 -0.02 0.06
0 2 0 -0.06 0.08
0 2 0 -0.04 0.04
0 2 0 0.04 0.08
0 2 0 -0.02 0.15
0 2 0 -0.01 0.12
-1 -2 0 11.33 0.79
-1 -2 0 12.12 1.06
-1 -2 0 12.44 0.8
-1 -2 0 13.37 0.8
-1 -2 0 11.44 0.93
-1 -2 0 11.25 0.76
-1 -2 0 12.74 0.82
-1 -2 0 12.28 0.81
-1 -2 0 12.34 0.8
1 2 0 11.64 0.78
1 2 0 13.12 0.77
1 2 0 12.4 0.95
1 2 0 12.3 0.81
1 2 0 12.72 0.78
1 2 0 11.36 0.81
1 2 0 11.46 1.05
1 2 0 10.96 0.96
1 2 0 11.71 0.78
-2 -2 0 91.03 5.54
-2 -2 0 89.6 5.51
-2 -2 0 97.19 5.51
-2 -2 0 94.03 5.51
-2 -2 0 90.77 5.51
-2 -2 0 100.55 5.53
2 2 0 96.88 5.41
2 2 0 89.97 5.47
2 2 0 89.63 5.42
2 2 0 92.38 5.43
2 2 0 91.96 5.42
2 2 0 94.28 5.45
2 2 0 93.66 5.61
2 2 0 90.85 5.44
2 2 0 94.2 5.42
2 2 0 89.81 5.45
2 2 0 87.63 5.4
2 2 0 97.49 5.4
-3 -2 0 188.74 11.11
-3 -2 0 192.22 11.11
-3 -2 0 189.94 11.13
-3 -2 0 192.85 11.13
-3 -2 0 188.02 11.09
-3 -2 0 195.99 11.15
-3 -2 0 190.58 11.17
3 2 0 190.63 10.92
3 2 0 188.09 10.88
3 2 0 183.96 10.89
3 2 0 193.53 10.96
3 2 0 180.17 10.88
3 2 0 188.73 10.91
3 2 0 186.31 10.89
3 2 0 180.24 10.91
3 2 0 190.15 11
3 2 0 189.48 10.93
3 2 0 195.55 10.91
-4 -2 0 55.7 3.42
-4 -2 0 54.1 3.41
-4 -2 0 53.39 3.4
-4 -2 0 50.02 3.42
-4 -2 0 54.33 3.48
-4 -2 0 52.65 3.55
-4 -2 0 54.16 3.45
4 2 0 55.17 3.44
4 2 0 53.02 3.29
4 2 0 55.33 3.36
4 2 0 51.39 3.42
4 2 0 51.41 3.35
-5 -2 0 0.19 0.73
-5 -2 0 -0.09 0.78
-5 -2 0 1.33 0.86
-5 -2 0 0.62 0.8
-5 -2 0 -0.7 0.9
-5 -2 0 0.28 0.96
-5 -2 0 0.97 0.78
5 2 0 -0.46 0.62
5 2 0 0.72 0.56
5 2 0 0.69 0.67
5 2 0 0.41 0.63
5 2 0 -0.65 0.53
-6 -2 0 16.35 2.03
-6 -2 0 12.34 1.72
-6 -2 0 24.57 1.86
-6 -2 0 15.28 1.76
-6 -2 0 23.15 2.1
-6 -2 0 16.11 1.88
6 2 0 7.29 1.17
6 2 0 9.56 1.26
6 2 0 11.06 1.34
6 2 0 12.66 1.39
6 2 0 10.12 1.13
-7 -2 0 0.53 1.23
-7 -2 0 0.14 1.15
-7 -2 0 1.1 1.29
-7 -2 0 1.9 1.23
-7 -2 0 -0.89 1.14
7 2 0 -0.78 0.76
7 2 0 0.19 0.84
7 2 0 -0.69 0.73
7 2 0 1.62 0.88
7 2 0 1.07 0.79
-8 -2 0 5.71 1.74
-8 -2 0 7.64 1.62
-8 -2 0 4.21 1.42
-8 -2 0 5.47 1.53
-8 -2 0 4.5 1.67
8 2 0 1.87 1.15
8 2 0 5.32 1.22
8 2 0 5.86 1.21
8 2 0 2.66 1.18
-9 -2 0 -0.04 1.39
-9 -2 0 4.2 1.65
-9 -2 0 -2.17 1.27
-9 -2 0 2.5 1.98
-9 -2 0 -0.51 1.54
9 2 0 0.29 0.91
9 2 0 -0.04 1.12
9 2 0 -0.43 1.21
9 2 0 0.28 1.44
-10 -2 0 11.84 2.32
-10 -2 0 9.15 2.08
-10 -2 0 7.73 2.16
10 2 0 7.3 1.6
10 2 0 6.41 1.58
10 2 0 8.71 1.74
10 2 0 8.29 2.12
10 2 0 7.66 1.77
-11 -2 0 3.15 2.04
-11 -2 0 -1.16 1.99
-11 -2 0 2.12 2.12
11 2 0 2.1 1.31
11 2 0 0.91 1.5
11 2 0 -2.02 1.77
11 2 0 2.83 1.62
11 2 0 0.32 1.33
-12 -2 0 6.21 2.63
-12 -2 0 1.29 2.11
-12 -2 0 4.17 2.35
12 2 0 1.8 1.62
12 2 0 3.87 1.7
12 2 0 4.08 1.54
12 2 0 -0.17 1.92
12 2 0 2.73 1.82
12 -3 0 2.74 1.59
12 -3 0 0.77 1.33
12 -3 0 -0.77 1.85
12 -3 0 0.06 2.33
12 -3 0 -1.84 1.43
12 -3 0 -2.27 1.56
12 -3 0 1.2 1.46
11 -3 0 12.44 2.69
11 -3 0 8.31 2.11
11 -3 0 7.89 1.81
11 -3 0 7.99 1.81
11 -3 0 10.84 1.94
11 -3 0 6.19 1.62
11 -3 0 9.88 2.27
10 -3 0 1.86 1.26
10 -3 0 -0.15 1.25
10 -3 0 -0.01 1.98
10 -3 0 -1.02 1.55
10 -3 0 -0.13 1.43
10 -3 0 1.92 1.28
10 -3 0 -0.31 1.17
-10 3 0 2.06 1.9
-10 3 0 -0.27 1.56
-10 3 0 -1.01 1.63
-10 3 0 2.05 1.76
-10 3 0 -1.02 1.9
-10 3 0 0.57 1.77
-10 3 0 -0.27 2.15
9 -3 0 -1.76 1.2
9 -3 0 -0.6 1.22
9 -3 0 0.06 1.08
9 -3 0 3.02 1.21
9 -3 0 0.82 1.11
9 -3 0 -1.12 1.57
9 -3 0 1.06 1.19
-9 3 0 0.56 1.77
-9 3 0 2.85 1.76
-9 3 0 2.22 1.68
-9 3 0 2.05 1.67
-9 3 0 0.66 1.66
-9 3 0 1 1.41
-9 3 0 1.5 1.45
8 -3 0 2.28 1
8 -3 0 3.03 1.18
8 -3 0 4.4 1.4
8 -3 0 2.54 1.63
-8 3 0 5.55 1.53
-8 3 0 3.34 1.84
-8 3 0 5.66 1.81
-8 3 0 2.12 1.72
-8 3 0 3.65 1.43
-8 3 0 5.25 1.54
-8 3 0 6.46 1.49
7 -3 0 0.73 0.82
7 -3 0 -0.42 1.11
-7 3 0 0.53 1.16
-7 3 0 -1.41 1.08
-7 3 0 -0.23 1.24
-7 3 0 2.5 1.3
-7 3 0 2.18 1.14
-7 3 0 -1.19 1.04
-7 3 0 1.99 1.1
-6 3 0 3 1.01
-6 3 0 4.35 1.04
-6 3 0 4.51 1.2
-6 3 0 2.68 1.3
-6 3 0 3.02 1.2
-6 3 0 2.76 0.99
-6 3 0 4.46 1.07
-5 3 0 38.72 3.18
-5 3 0 46.28 3.05
-5 3 0 46 3.13
-5 3 0 46.35 3.01
-5 3 0 46.24 3.05
-5 3 0 43 3.11
-5 3 0 43.12 2.99
-4 3 0 9.99 1.19
-4 3 0 9.92 1.35
-4 3 0 10.56 1.24
-4 3 0 10.9 1.11
-4 3 0 11.18 1.17
-4 3 0 8.77 1.08
-4 3 0 8.38 1.08
3 -3 0 61.32 4.19
3 -3 0 60.33 4.28
3 -3 0 75.71 4.21
3 -3 0 70.63 4.33
3 -3 0 80.91 4.28
3 -3 0 79.2 4.2
3 -3 0 69.86 4.24
3 -3 0 67.66 4.26
3 -3 0 67.94 4.23
-3 3 0 78.5 4.51
-3 3 0 73.79 4.6
-3 3 0 73.64 4.52
-3 3 0 77.43 4.58
-3 3 0 81.34 4.52
-3 3 0 71.7 4.63
-3 3 0 68.64 4.52
2 -3 0 61.24 3.67
2 -3 0 63.42 3.68
2 -3 0 61.84 3.69
2 -3 0 59.83 3.77
2 -3 0 62.09 3.79
2 -3 0 65.26 3.72
2 -3 0 60.56 3.71
2 -3 0 61 3.85
2 -3 0 60.5 3.73
2 -3 0 64.74 3.74
2 -3 0 62.38 3.8
-2 3 0 63.81 3.78
-2 3 0 66.59 3.79
-2 3 0 62.24 3.79
-2 3 0 61.9 3.83
-2 3 0 61.3 3.83
-2 3 0 65.44 3.91
1 -3 0 75.84 4.61
1 -3 0 77.58 4.56
1 -3 0 77.55 4.59
1 -3 0 80.78 4.51
1 -3 0 79.81 4.75
1 -3 0 74.95 4.63
1 -3 0 79.72 4.82
1 -3 0 79.39 4.54
1 -3 0 83.17 4.66
-1 3 0 76.99 4.59
-1 3 0 75.95 4.63
-1 3 0 81.27 4.85
-1 3 0 73.83 4.65
-1 3 0 85.81 4.64
-1 3 0 82.07 4.79
-1 3 0 82.16 4.7
0 -3 0 -0.01 0.21
0 -3 0 -0.1 0.23
0 -3 0 0.1 0.18
0 -3 0 0.02 0.12
0 -3 0 0.02 0.22
0 -3 0 0.13 0.31
0 -3 0 0.27 0.37
0 -3 0 -0.03 0.06
0 3 0 0.3 0.24
0 3 0 0.19 0.23
0 3 0 0.2 0.15
0 3 0 -0.01 0.34
0 3 0 0 0.08
0 3 0 0.01 0.22
0 3 0 -0.6 0.37
0 3 0 -0.07 0.13
-1 -3 0 79.73 4.88
-1 -3 0 77.3 4.54
-1 -3 0 71.96 4.73
-1 -3 0 79.5 4.74
-1 -3 0 82.56 4.59
-1 -3 0 68.81 4.58
-1 -3 0 79.36 4.58
-1 -3 0 75.88 4.52
-1 -3 0 88.75 4.55
-1 -3 0 78.2 4.53
1 3 0 71.37 4.5
1 3 0 79.1 4.51
1 3 0 78.79 4.7
1 3 0 77.13 4.47
1 3 0 76.94 4.53
1 3 0 76.59 4.48
1 3 0 78.04 4.67
1 3 0 77.54 4.48
1 3 0 79.7 4.53
1 3 0 79.11 4.85
-2 -3 0 60.17 3.89
-2 -3 0 64.57 3.79
-2 -3 0 64.13 3.8
-2 -3 0 64.56 4.08
-2 -3 0 62.13 3.81
-2 -3 0 64.67 3.74
-2 -3 0 67.61 3.82
-2 -3 0 62.83 3.8
-2 -3 0 60.42 3.8
2 3 0 60.32 3.88
2 3 0 65.08 4.09
2 3 0 62.62 3.67
2 3 0 59.99 3.71
2 3 0 61.56 3.71
2 3 0 63.55 3.76
2 3 0 63.47 3.7
2 3 0 59.55 3.68
2 3 0 63.24 3.73
-3 -3 0 72.05 4.39
-3 -3 0 78.89 4.34
-3 -3 0 66.97 4.32
-3 -3 0 66.88 4.33
-3 -3 0 72.97 4.34
3 3 0 70.49 4.17
3 3 0 74.71 4.16
3 3 0 73.03 4.19
3 3 0 64.94 4.25
3 3 0 62.37 4.18
3 3 0 72.93 4.15
3 3 0 62.46 4.15
3 3 0 74.76 4.22
3 3 0 65.86 4.12
3 3 0 64.27 4.1
3 3 0 63.12 4.41
3 3 0 78.4 4.18
-4 -3 0 10.54 1.2
-4 -3 0 6.43 1.15
-4 -3 0 11.61 1.21
-4 -3 0 11.73 1.23
-4 -3 0 11.98 1.25
4 3 0 8.79 0.95
4 3 0 7.78 0.97
4 3 0 8.85 1.08
4 3 0 10.52 1.17
4 3 0 8.63 1.27
4 3 0 6.66 0.94
-5 -3 0 44.65 3.05
-5 -3 0 41.69 3.02
-5 -3 0 42.9 3.12
-5 -3 0 44.14 3
-5 -3 0 46.55 3.07
5 3 0 39 2.81
5 3 0 44.65 2.84
5 3 0 45.31 3.11
5 3 0 40.79 2.88
5 3 0 40.84 2.87
-6 -3 0 0.97 1.04
-6 -3 0 3.93 1.09
-6 -3 0 1.54 1.08
-6 -3 0 4.79 1.22
-6 -3 0 3.97 1.12
6 3 0 1.77 0.85
6 3 0 1.37 0.84
6 3 0 3.8 1.04
6 3 0 2.37 0.86
6 3 0 1.39 0.8
-7 -3 0 2.23 1.15
-7 -3 0 2.48 1.32
-7 -3 0 -0.13 0.97
-7 -3 0 2.35 1.32
-7 -3 0 2.75 1.2
7 3 0 0.53 0.78
7 3 0 -0.58 0.86
7 3 0 0.77 0.98
7 3 0 1.11 0.9
7 3 0 -0.84 0.95
-8 -3 0 4.6 1.44
-8 -3 0 5.33 1.73
-8 -3 0 5.85 1.62
-8 -3 0 2.41 1.36
-8 -3 0 3.87 1.65
8 3 0 0.89 1.09
8 3 0 1.73 1.17
8 3 0 2.61 1.24
8 3 0 2.69 1.14
-9 -3 0 3.03 1.53
-9 -3 0 -0.76 1.38
-9 -3 0 1.73 1.94
-9 -3 0 -0.68 1.61
-9 -3 0 1.45 1.65
9 3 0 1.01 1.04
9 3 0 2.63 1.17
9 3 0 1.12 1.31
9 3 0 1.14 1.32
-10 -3 0 -0.58 1.82
-10 -3 0 -0.31 1.75
-10 -3 0 1.82 1.74
10 3 0 0.43 1.23
10 3 0 2.02 1.32
10 3 0 1.25 1.29
10 3 0 0.29 1.63
10 3 0 0.52 1.26
-11 -3 0 8.72 2.36
-11 -3 0 16.48 2.75
-11 -3 0 14.46 2.61
11 3 0 7.79 1.84
11 3 0 10.9 1.9
11 3 0 9.27 1.91
11 3 0 7.9 1.69
11 3 0 12.54 2.53
-12 -3 0 0.18 2.12
-12 -3 0 0.3 2.34
-12 -3 0 3.84 2.19
12 3 0 1.31 1.37
12 3 0 2.43 1.82
12 3 0 -0.13 1.88
12 3 0 -0.27 1.47
12 -4 0 -3.51 1.37
12 -4 0 1.1 2.51
12 -4 0 5.03 1.63
12 -4 0 2.47 2.05
12 -4 0 0.18 1.51
12 -4 0 2.36 1.87
12 -4 0 -0.38 1.36
11 -4 0 -0.08 1.48
11 -4 0 -0.53 1.3
11 -4 0 -0.85 1.54
11 -4 0 -0.3 1.32
11 -4 0 0.15 1.14
11 -4 0 1.08 2.08
11 -4 0 -0.02 1.55
-11 4 0 -0.08 2.23
-11 4 0 1.47 1.99
10 -4 0 1.78 1.28
10 -4 0 1.3 1.64
10 -4 0 -0.33 1.16
10 -4 0 2.29 1.3
10 -4 0 -1.41 1.14
10 -4 0 -0.14 1.33
10 -4 0 -2.74 1.5
-10 4 0 -0.13 2.26
-10 4 0 1.64 1.94
-10 4 0 2.38 2.02
-10 4 0 3.42 1.77
9 -4 0 1.3 1.24
9 -4 0 0.03 1.03
9 -4 0 1.82 1.16
9 -4 0 -0.09 1.43
9 -4 0 -0.54 1.05
9 -4 0 1.61 1.5
-9 4 0 0.44 1.42
-9 4 0 -0.22 1.91
-9 4 0 0.37 1.42
-9 4 0 1.65 1.77
-9 4 0 3.83 1.75
-9 4 0 1.65 1.82
8 -4 0 -0.58 0.87
8 -4 0 -0.77 1.33
8 -4 0 2.95 1.33
8 -4 0 -0.08 0.92
-8 4 0 0.21 1.49
-8 4 0 0.91 1.23
-8 4 0 0.23 1.35
-8 4 0 -0.05 1.22
-8 4 0 0.45 1.32
-8 4 0 3.35 1.73
-8 4 0 0.44 1.25
7 -4 0 0.14 0.89
7 -4 0 0.24 1
-7 4 0 1.4 1.2
-7 4 0 1.43 1.15
-7 4 0 0.11 1.36
-7 4 0 1.99 1.33
-7 4 0 2.82 1.15
-7 4 0 2.18 1.24
-7 4 0 -0.33 1.15
6 -4 0 13.06 1.63
6 -4 0 10.6 1.37
-6 4 0 13.38 1.62
-6 4 0 16.75 1.7
-6 4 0 12.07 1.68
-6 4 0 13.32 1.72
-6 4 0 17.7 1.69
-6 4 0 12.79 1.61
-6 4 0 14.93 1.91
5 -4 0 125.63 7.55
5 -4 0 120.77 7.35
-5 4 0 123.33 7.96
-5 4 0 130.89 7.8
-5 4 0 129.24 7.76
-5 4 0 136.31 7.85
-5 4 0 125.82 7.75
-5 4 0 134.24 7.89
-5 4 0 124.91 7.87
4 -4 0 3.31 0.7
4 -4 0 3.16 0.73
4 -4 0 3.53 0.72
4 -4 0 1.84 0.79
-4 4 0 3.63 0.79
-4 4 0 2.47 0.79
-4 4 0 2.69 1.08
-4 4 0 3.68 0.77
-4 4 0 5.12 0.81
-4 4 0 2.81 0.87
-4 4 0 4.63 0.9
3 -4 0 7.8 0.75
3 -4 0 1.96 0.55
3 -4 0 3.95 0.66
3 -4 0 1.03 0.64
3 -4 0 2.36 0.66
3 -4 0 4.96 0.68
3 -4 0 1.27 0.68
3 -4 0 8.66 0.71
-3 4 0 9.61 1
-3 4 0 6.79 0.82
-3 4 0 9.28 0.85
-3 4 0 5.12 0.85
-3 4 0 7.79 0.83
-3 4 0 7.12 0.99
2 -4 0 12.57 1.18
2 -4 0 13.99 1.36
2 -4 0 13.77 1.14
2 -4 0 14.32 1.07
2 -4 0 15.62 1.03
2 -4 0 14.33 0.98
2 -4 0 11.76 1.4
2 -4 0 13.08 1.07
-2 4 0 13.51 1.06
-2 4 0 13.85 1.06
-2 4 0 16.33 1.2
-2 4 0 13.91 1.26
-2 4 0 17.06 1.16
-2 4 0 11.35 1.3
-2 4 0 13.69 1.34
1 -4 0 142.5 8.28
1 -4 0 144.48 8.37
1 -4 0 140.2 8.38
1 -4 0 138.4 8.39
1 -4 0 142.73 8.49
1 -4 0 147.65 8.58
1 -4 0 157.28 8.73
1 -4 0 146.39 8.44
-1 4 0 151.34 8.78
-1 4 0 145.04 8.57
-1 4 0 149.19 8.63
-1 4 0 150.01 8.63
-1 4 0 147.65 8.89
-1 4 0 143.62 8.5
-1 4 0 151.98 8.58
0 -4 0 120.51 6.9
0 -4 0 115.45 7.08
0 -4 0 113.25 6.88
0 -4 0 113.78 6.91
0 -4 0 120.74 6.85
0 -4 0 122.98 6.76
0 -4 0 118.81 6.82
0 4 0 119.81 6.97
0 4 0 115.69 6.93
0 4 0 122.43 6.81
0 4 0 122.41 7.14
0 4 0 119.99 6.89
0 4 0 118.07 7.28
0 4 0 116.54 6.9
0 4 0 117.78 6.95
-1 -4 0 150.14 8.39
-1 -4 0 129.76 8.53
-1 -4 0 144.02 8.6
-1 -4 0 148.49 8.37
-1 -4 0 135.86 8.36
-1 -4 0 147.05 8.32
-1 -4 0 148.41 8.28
-1 -4 0 157.42 8.82
-1 -4 0 140.81 8.36
1 4 0 143.34 8.56
1 4 0 144.33 8.46
1 4 0 143.89 8.55
1 4 0 145.61 8.48
1 4 0 149.83 8.79
1 4 0 149.86 8.71
1 4 0 150.35 8.55
1 4 0 147.65 8.67
1 4 0 159.03 8.49
1 4 0 140.56 8.96
-2 -4 0 16.44 1.14
-2 -4 0 13.25 1.13
-2 -4 0 17.04 1.15
-2 -4 0 16.16 1.21
-2 -4 0 17.97 1.79
-2 -4 0 13.74 1.42
-2 -4 0 15.63 1.13
-2 -4 0 14.26 1.04
-2 -4 0 12.08 1.14
-2 -4 0 19.84 1.15
2 4 0 12.14 1.01
2 4 0 12.69 1.11
2 4 0 15.25 1.07
2 4 0 12.39 1.11
2 4 0 12.35 1.04
2 4 0 16.99 1.53
2 4 0 16.59 1.78
2 4 0 15.75 1.04
-3 -4 0 1.2 0.55
-3 -4 0 1.5 0.6
-3 -4 0 4.29 0.71
3 4 0 1.61 0.7
3 4 0 0.87 0.5
3 4 0 2.41 0.91
3 4 0 0.98 0.48
3 4 0 3.76 0.57
3 4 0 0.95 0.41
-4 -4 0 2.69 0.83
-4 -4 0 3.7 0.8
-4 -4 0 3.58 0.82
-4 -4 0 5.01 0.83
-4 -4 0 2.66 0.79
4 4 0 3.79 0.91
4 4 0 2.42 0.64
4 4 0 4.21 0.79
4 4 0 3.7 1.1
4 4 0 2.83 0.76
4 4 0 3.14 0.63
-5 -4 0 125.26 7.78
-5 -4 0 123.38 7.79
-5 -4 0 131.24 7.8
-5 -4 0 128.49 7.9
-5 -4 0 137.28 7.85
5 4 0 125.71 7.3
5 4 0 124.47 7.45
5 4 0 124.3 7.68
5 4 0 116.57 7.38
5 4 0 117.05 7.34
-6 -4 0 17.43 1.84
-6 -4 0 15.11 1.64
-6 -4 0 9.93 1.48
-6 -4 0 10.53 1.52
-6 -4 0 15.93 1.8
6 4 0 9.64 1.36
6 4 0 10.16 1.45
6 4 0 15.14 1.87
6 4 0 12.59 1.35
6 4 0 9.43 1.32
-7 -4 0 1.87 1.15
-7 -4 0 2.12 1.29
-7 -4 0 0.73 1.22
-7 -4 0 1.07 1.15
-7 -4 0 1.01 1.13
7 4 0 0.05 0.83
7 4 0 0 0.86
7 4 0 1.52 0.84
7 4 0 0.2 1.08
7 4 0 -0.65 0.93
-8 -4 0 0.05 1.24
-8 -4 0 3.57 1.73
-8 -4 0 -0.27 1.24
-8 -4 0 0.75 1.35
-8 -4 0 0.64 1.23
8 4 0 -0.79 1.1
8 4 0 0.41 0.91
8 4 0 0.82 1.26
8 4 0 -0.47 0.98
-9 -4 0 0.37 1.42
-9 -4 0 0.28 2.03
-9 -4 0 2.24 1.74
-9 -4 0 0.5 1.46
9 4 0 0.34 1.23
9 4 0 1.17 1.06
9 4 0 -0.03 1.23
9 4 0 0.4 1.12
-10 -4 0 0.3 1.64
-10 -4 0 1.24 1.69
-10 -4 0 1.5 1.75
10 4 0 0.06 1.04
10 4 0 -0.26 1.24
10 4 0 0.68 1.48
10 4 0 1.11 1.48
10 4 0 1.87 1.64
-11 -4 0 4.66 2.36
-11 -4 0 2.41 2.19
-11 -4 0 0.35 1.88
11 4 0 1.51 1.7
11 4 0 0.79 1.29
11 4 0 0.66 1.49
11 4 0 1.02 1.62
-12 -4 0 1.19 2.07
-12 -4 0 -1.26 1.97
-12 -4 0 3.15 2.17
12 4 0 1.57 1.36
12 4 0 -2.33 1.74
12 4 0 -0.68 1.54
12 -5 0 3.39 1.87
12 -5 0 0.72 1.92
12 -5 0 1.29 2.47
12 -5 0 0.8 1.58
12 -5 0 -1.84 1.13
12 -5 0 -1.31 1.33
12 -5 0 1.64 1.53
11 -5 0 5.93 2.61
11 -5 0 3.54 1.46
11 -5 0 4.22 1.55
11 -5 0 2.41 1.69
11 -5 0 4.51 1.68
11 -5 0 5.55 2.11
11 -5 0 5.69 1.6
-11 5 0 7.81 2.53
-11 5 0 8.64 2.73
10 -5 0 0.69 1.67
10 -5 0 -2.07 1.18
10 -5 0 -0.87 1.2
10 -5 0 3.16 1.36
10 -5 0 0.12 1.1
10 -5 0 1.81 1.23
10 -5 0 -0.42 2.03
-10 5 0 1.72 1.77
-10 5 0 1.52 2.27
-10 5 0 -0.73 1.79
-10 5 0 0.21 1.87
9 -5 0 5.18 1.58
9 -5 0 3.2 2.05
9 -5 0 -0.64 1.04
9 -5 0 -0.07 1.14
-9 5 0 3.3 1.66
-9 5 0 4.39 1.73
-9 5 0 4.75 1.63
-9 5 0 4.51 1.9
-9 5 0 4 2.12
8 -5 0 1.8 1.5
8 -5 0 1.56 1.05
8 -5 0 2.07 1.45
8 -5 0 0.81 0.94
-8 5 0 2.65 1.35
-8 5 0 2.43 1.47
-8 5 0 3.08 1.39
-8 5 0 4.53 1.7
-8 5 0 1.29 1.49
-8 5 0 2.17 1.47
7 -5 0 0.17 0.78
7 -5 0 2.08 0.83
7 -5 0 1.45 0.79
7 -5 0 0.33 1.04
7 -5 0 0.96 0.93
-7 5 0 0.04 1.28
-7 5 0 1.51 1.11
-7 5 0 -1.02 1.1
-7 5 0 -0.31 1.35
-7 5 0 0.09 1.16
-7 5 0 2.78 1.16
6 -5 0 -0.02 0.98
6 -5 0 0.35 0.71
6 -5 0 0.44 0.67
6 -5 0 0.01 0.74
-6 5 0 0.87 0.9
-6 5 0 0.31 1.02
-6 5 0 0.93 1.15
-6 5 0 1.15 0.91
-6 5 0 1.19 1.19
-6 5 0 1.05 0.89
5 -5 0 8.74 1.33
5 -5 0 8.11 1.11
5 -5 0 8.45 1.12
5 -5 0 10.4 1.22
-5 5 0 10.51 1.41
-5 5 0 13.87 1.59
-5 5 0 14.07 1.48
-5 5 0 14.06 1.47
-5 5 0 12.18 1.65
-5 5 0 12.71 1.56
4 -5 0 5.56 1.12
4 -5 0 6.24 0.89
4 -5 0 6.53 0.98
4 -5 0 7.06 1.06
-4 5 0 7.41 1.11
-4 5 0 7.98 0.98
-4 5 0 6.98 1.27
-4 5 0 5.92 0.93
-4 5 0 7.04 1.01
-4 5 0 6 1.12
3 -5 0 85.33 4.67
3 -5 0 70.51 4.85
3 -5 0 80.59 4.66
3 -5 0 85.67 4.74
3 -5 0 81.01 4.74
3 -5 0 79.38 4.78
3 -5 0 65.76 4.68
3 -5 0 89.84 4.78
3 -5 0 70.66 4.94
3 -5 0 74.6 4.83
3 -5 0 81.71 4.83
-3 5 0 85.5 5.01
-3 5 0 82.72 5.01
-3 5 0 79.1 5.15
-3 5 0 84.31 5.04
-3 5 0 87.67 5.1
2 -5 0 5.88 0.67
2 -5 0 4.68 1.04
2 -5 0 2.87 0.61
2 -5 0 5.15 0.8
2 -5 0 5.4 0.59
2 -5 0 5.17 0.96
2 -5 0 5.26 0.69
2 -5 0 3.92 0.38
2 -5 0 3.14 0.47
-2 5 0 7.01 0.62
-2 5 0 2.29 0.66
-2 5 0 5.07 0.6
-2 5 0 3.77 0.56
-2 5 0 6.39 1.06
-2 5 0 5.61 0.99
-2 5 0 6.41 0.83
1 -5 0 57.06 3.33
1 -5 0 54.06 3.59
1 -5 0 53.55 3.18
1 -5 0 51.9 3.42
1 -5 0 51.27 3.26
1 -5 0 49.45 3.22
1 -5 0 53.01 3.72
-1 5 0 54.61 3.09
-1 5 0 48.87 3.41
-1 5 0 53.27 3.3
-1 5 0 54.32 3.25
-1 5 0 52.82 3.58
-1 5 0 51.49 3.77
-1 5 0 52.13 3.19
-1 5 0 54.15 3.35
0 -5 0 0.32 0.46
0 -5 0 0.28 0.82
0 -5 0 -0.31 0.86
0 -5 0 -0.21 0.4
0 -5 0 -0.15 0.26
0 -5 0 0.55 0.54
0 -5 0 -0.07 0.18
0 -5 0 -0.13 0.5
0 5 0 0.79 0.77
0 5 0 -0.82 0.88
0 5 0 -0.12 0.51
0 5 0 0.02 0.19
0 5 0 0.24 0.53
0 5 0 -0.09 0.5
0 5 0 0.11 0.33
0 5 0 -0.63 0.36
-1 -5 0 56.15 3.84
-1 -5 0 53 3.16
-1 -5 0 48.55 3.19
-1 -5 0 56.54 3.19
-1 -5 0 50.11 3.22
-1 -5 0 51.79 3.57
-1 -5 0 53.64 3.11
-1 -5 0 50.95 3.43
1 5 0 52.33 3.4
1 5 0 53.12 3.92
1 5 0 55.95 3.17
1 5 0 52.01 3.25
1 5 0 51.44 3.3
1 5 0 53.66 3.31
1 5 0 52.92 3.12
1 5 0 54.45 3.67
1 5 0 54.27 3.45
1 5 0 55.78 3.17
-2 -5 0 4.56 0.5
-2 -5 0 3.63 0.57
-2 -5 0 5.4 0.98
-2 -5 0 4.35 0.61
-2 -5 0 3.6 1.1
-2 -5 0 3.98 0.61
-2 -5 0 5.32 0.61
-2 -5 0 3.51 1.08
-2 -5 0 4.46 0.63
-2 -5 0 3.58 0.58
2 5 0 7.7 1.19
2 5 0 4.03 0.54
2 5 0 4.27 0.67
2 5 0 3.74 0.65
2 5 0 2.82 0.52
2 5 0 5.26 1.01
2 5 0 3.99 0.53
2 5 0 3.51 0.55
2 5 0 4.77 1.21
2 5 0 3.87 0.61
-3 -5 0 79.13 4.85
-3 -5 0 84.94 4.86
-3 -5 0 78.92 4.87
-3 -5 0 76.96 4.84
-3 -5 0 74.16 4.99
-3 -5 0 73.64 5.22
-3 -5 0 89.12 4.86
-3 -5 0 85.64 4.86
3 5 0 65.07 4.45
3 5 0 70.2 4.38
3 5 0 80.6 4.45
3 5 0 61.84 4.79
3 5 0 83.84 4.48
3 5 0 70.3 4.51
3 5 0 82.45 4.48
3 5 0 77.04 4.78
3 5 0 66.44 4.98
-4 -5 0 6.72 0.97
-4 -5 0 6.97 0.96
-4 -5 0 7.75 1.05
-4 -5 0 7.23 1.01
-4 -5 0 5.54 0.94
-4 -5 0 7.34 1.06
4 5 0 4.45 1.3
4 5 0 9.79 1.34
4 5 0 8.04 0.87
4 5 0 6.18 0.96
4 5 0 6.56 0.98
4 5 0 6.98 0.94
-5 -5 0 11.78 1.38
-5 -5 0 10.82 1.39
-5 -5 0 13.12 1.47
-5 -5 0 9.31 1.28
-5 -5 0 9.13 1.35
5 5 0 9.26 1.62
5 5 0 9.74 1.1
5 5 0 8.31 1.15
5 5 0 6.62 1.05
5 5 0 8.95 1.37
-6 -5 0 -0.01 0.89
-6 -5 0 1.34 0.92
-6 -5 0 1.2 1.03
-6 -5 0 -0.47 1.07
-6 -5 0 -0.29 0.84
6 5 0 0.95 0.78
6 5 0 -0.58 0.64
6 5 0 0.51 0.71
6 5 0 0.71 1.1
6 5 0 -1.33 0.89
-7 -5 0 0.82 1.1
-7 -5 0 -0.62 1.19
-7 -5 0 0.07 1.08
-7 -5 0 1 1.07
-7 -5 0 1.07 1.4
7 5 0 1.52 0.9
7 5 0 0.58 0.87
7 5 0 2.05 1.01
7 5 0 -0.11 1.15
-8 -5 0 0.98 1.62
-8 -5 0 4.69 1.62
-8 -5 0 -1.23 1.22
-8 -5 0 0.55 1.31
-8 -5 0 2.17 1.37
8 5 0 -0.29 1.03
8 5 0 0.48 1.08
8 5 0 2.4 1.14
8 5 0 1.01 1.34
-9 -5 0 0.16 1.65
-9 -5 0 4.59 1.67
-9 -5 0 2.97 1.6
9 5 0 3.37 1.23
9 5 0 1.96 1.44
9 5 0 2.09 1.23
9 5 0 2.03 1.15
-10 -5 0 1.61 1.97
-10 -5 0 3.51 1.76
-10 -5 0 0.88 1.7
10 5 0 -0.69 1.32
10 5 0 1.5 1.4
10 5 0 0 1.51
10 5 0 -0.1 1.16
10 5 0 -0.83 1.14
-11 -5 0 8.65 2.3
-11 -5 0 2.08 2.01
-11 -5 0 2.44 1.99
11 5 0 6.03 1.92
11 5 0 5.32 1.78
11 5 0 4.18 1.51
-12 -5 0 6.3 2.57
-12 -5 0 2.26 2.38
-12 -5 0 1.09 2.18
12 5 0 -3.82 1.42
12 5 0 3.08 1.68
12 5 0 1.96 1.45
12 -6 0 -0.07 1.34
12 -6 0 1.98 1.57
12 -6 0 1.64 2.36
12 -6 0 0 1.45
12 -6 0 2.01 2.08
12 -6 0 -0.13 1.86
-12 6 0 2.26 2.58
-12 6 0 2.16 2.63
11 -6 0 0.21 1.35
11 -6 0 -0.29 1.3
11 -6 0 0.59 2.06
11 -6 0 0.55 1.87
11 -6 0 2.53 1.44
11 -6 0 0.01 1.51
11 -6 0 1.59 1.35
-11 6 0 -0.87 2.17
-11 6 0 2.27 2.28
-11 6 0 -2.35 1.76
10 -6 0 2.58 1.21
10 -6 0 2.17 1.35
10 -6 0 -1.43 1.62
10 -6 0 1.34 1.55
10 -6 0 -0.93 1.18
10 -6 0 -0.47 1.88
-10 6 0 7.15 2.23
-10 6 0 4.73 2.22
-10 6 0 2.6 2.32
-10 6 0 1.54 1.65
9 -6 0 2.12 1.5
9 -6 0 2.11 1.78
9 -6 0 1.91 1.19
9 -6 0 -0.56 1.03
-9 6 0 2.61 1.51
-9 6 0 1.28 1.94
-9 6 0 4.39 1.88
-9 6 0 3.89 2.18
8 -6 0 22.85 2.59
8 -6 0 18.14 2.66
8 -6 0 17.29 1.82
8 -6 0 16.49 1.97
-8 6 0 16.03 2.08
-8 6 0 20.74 2.29
-8 6 0 21.28 2.5
-8 6 0 12.87 2.37
7 -6 0 4.4 1.06
7 -6 0 4.55 1.12
7 -6 0 6.97 1.18
7 -6 0 1.57 1.21
7 -6 0 5.14 1.62
7 -6 0 4.49 0.96
-7 6 0 5.89 1.38
-7 6 0 5.8 1.34
-7 6 0 5.45 1.72
-7 6 0 7.06 1.4
-7 6 0 4.7 1.62
6 -6 0 17.4 1.7
6 -6 0 17.32 1.98
6 -6 0 17.25 1.77
6 -6 0 17.49 1.55
6 -6 0 14.58 1.47
-6 6 0 20.59 2.37
-6 6 0 19.6 1.92
-6 6 0 20.8 2.16
-6 6 0 19.06 1.95
-6 6 0 18.39 1.9
5 -6 0 5.19 0.93
5 -6 0 4.25 1.03
5 -6 0 4.57 1.11
5 -6 0 5.56 1.14
-5 6 0 6.57 1.06
-5 6 0 5.67 1.06
-5 6 0 6.42 1.1
-5 6 0 4.78 1.29
-5 6 0 4.85 1.12
4 -6 0 0.31 0.75
4 -6 0 -0.05 0.77
4 -6 0 0.12 0.81
4 -6 0 0.83 0.64
-4 6 0 -0.58 0.58
-4 6 0 1.92 0.8
-4 6 0 -0.77 0.79
3 -6 0 46.02 3.24
3 -6 0 47.75 2.95
3 -6 0 48.22 2.85
3 -6 0 47.46 3.03
3 -6 0 44.78 2.89
3 -6 0 48.43 3.14
3 -6 0 48.14 2.95
3 -6 0 43.9 2.78
3 -6 0 49.17 2.99
3 -6 0 44.92 2.93
3 -6 0 44.39 3.36
-3 6 0 46.79 3.13
-3 6 0 46.02 2.93
-3 6 0 46.43 3.02
-3 6 0 48.38 2.95
-3 6 0 46.83 3.07
-3 6 0 46.46 2.92
2 -6 0 184.72 10.69
2 -6 0 183.54 10.96
2 -6 0 182.5 10.69
2 -6 0 181.96 10.5
2 -6 0 187.71 10.61
2 -6 0 183.23 10.68
2 -6 0 185.89 10.74
2 -6 0 183.23 10.78
2 -6 0 185.88 10.87
2 -6 0 182.58 10.57
2 -6 0 179.9 11.1
-2 6 0 180.84 11.46
-2 6 0 183.84 11.03
-2 6 0 190.91 11.17
-2 6 0 212.32 11.13
-2 6 0 194.8 11.06
-2 6 0 198.12 11.1
-2 6 0 188.04 11.21
-2 6 0 182.53 11.35
1 -6 0 14.67 1.32
1 -6 0 10.93 0.95
1 -6 0 10.88 1.16
1 -6 0 11.32 1
1 -6 0 11.01 1.19
1 -6 0 9.44 1.41
1 -6 0 14.97 1.23
1 -6 0 11.04 1.65
-1 6 0 13.09 1.36
-1 6 0 10.11 1.42
-1 6 0 12.75 1.11
-1 6 0 10.9 0.77
-1 6 0 12.32 1.11
-1 6 0 11.31 1.71
-1 6 0 11.92 1.11
-1 6 0 10.8 0.96
0 -6 0 237.94 14.47
0 -6 0 251.64 13.77
0 -6 0 242.06 14.28
0 -6 0 230.42 13.92
0 -6 0 241.29 13.86
0 -6 0 240.54 13.98
0 -6 0 246.17 14.04
0 -6 0 238.19 13.98
0 6 0 240.17 13.97
0 6 0 236.6 14.46
0 6 0 241.32 13.94
0 6 0 234.33 14.23
0 6 0 253.56 13.88
0 6 0 234.66 13.75
0 6 0 245.15 14
-1 -6 0 11.11 0.92
-1 -6 0 9.21 1.58
-1 -6 0 10.94 1.07
-1 -6 0 13.24 1.58
-1 -6 0 11.59 0.99
-1 -6 0 10.36 0.91
-1 -6 0 12.65 1.45
1 6 0 16.18 1.73
1 6 0 11.6 0.82
1 6 0 10.97 0.96
1 6 0 12.03 1.8
1 6 0 10.33 0.71
1 6 0 11 1.1
1 6 0 10.73 0.84
1 6 0 9.75 1.04
1 6 0 12.38 1.31
1 6 0 13.36 1.32
-2 -6 0 181.65 10.8
-2 -6 0 170.87 11.12
-2 -6 0 190.83 11.38
-2 -6 0 183.75 10.74
-2 -6 0 184.34 11.11
-2 -6 0 192.86 10.82
-2 -6 0 197.93 10.72
-2 -6 0 180.78 10.7
2 6 0 177.57 10.4
2 6 0 178.54 10.84
2 6 0 179.23 10.52
2 6 0 182.79 10.43
2 6 0 194.46 11.17
2 6 0 170.65 10.74
2 6 0 184.1 10.54
2 6 0 183.64 10.43
2 6 0 174.74 10.49
-3 -6 0 47.1 3.29
-3 -6 0 44.2 2.96
-3 -6 0 45.74 2.96
-3 -6 0 47.44 3.6
-3 -6 0 48.97 3.03
-3 -6 0 44.61 2.84
-3 -6 0 47.27 2.97
-3 -6 0 47.17 2.97
-3 -6 0 49.94 2.98
3 6 0 46.07 2.79
3 6 0 46.83 2.78
3 6 0 50.73 2.82
3 6 0 40.81 3.18
3 6 0 39.82 2.83
3 6 0 42.99 3.52
3 6 0 44.95 2.77
3 6 0 37.34 2.89
3 6 0 43.3 3.23
3 6 0 46 2.88
-4 -6 0 0.47 0.77
-4 -6 0 3.19 0.77
-4 -6 0 3.3 0.84
-4 -6 0 3.38 0.83
-4 -6 0 2.48 0.74
-4 -6 0 0.27 0.83
4 6 0 -0.47 1.03
4 6 0 1.28 0.63
4 6 0 2.8 0.73
4 6 0 2.63 1.29
4 6 0 0.34 0.62
4 6 0 1.08 0.95
4 6 0 0.31 0.5
-5 -6 0 7.5 1.17
-5 -6 0 4.96 1.1
-5 -6 0 4.17 1.01
-5 -6 0 5.12 1.05
-5 -6 0 4.69 1.01
5 6 0 2.96 0.89
5 6 0 6.03 1.29
5 6 0 6.04 0.87
5 6 0 6.17 1.51
5 6 0 4.18 0.96
-6 -6 0 19.39 1.95
-6 -6 0 21.78 2.14
-6 -6 0 16.15 1.88
-6 -6 0 17.6 1.99
-6 -6 0 16.58 1.85
6 6 0 17.32 1.81
6 6 0 18.24 1.82
6 6 0 17.39 2.34
6 6 0 17.74 1.68
-7 -6 0 5.75 1.38
-7 -6 0 7.62 1.5
-7 -6 0 7.31 1.56
-7 -6 0 7.36 1.61
-7 -6 0 9 1.51
7 6 0 5 1.22
7 6 0 5.72 1.12
7 6 0 6.38 1.76
7 6 0 5.5 1.11
-8 -6 0 19.61 2.35
-8 -6 0 20.79 2.35
-8 -6 0 19.2 2.59
-8 -6 0 18.82 2.49
8 6 0 18.16 1.89
8 6 0 14.24 1.94
8 6 0 20.79 2.66
8 6 0 12.55 1.82
-9 -6 0 4 1.81
-9 -6 0 -0.45 1.6
-9 -6 0 3.48 1.81
9 6 0 0.82 1.12
9 6 0 2.69 1.32
9 6 0 1.14 1.08
9 6 0 1.48 1.27
-10 -6 0 2.01 1.94
-10 -6 0 1.8 1.93
-10 -6 0 2.65 1.8
10 6 0 0.47 1.41
10 6 0 -0.58 1.09
10 6 0 0.88 1.38
10 6 0 -0.54 1.35
10 6 0 4.43 1.42
-11 -6 0 1.95 2.19
-11 -6 0 -0.36 1.83
-11 -6 0 2.02 2.12
11 6 0 -0.27 1.09
11 6 0 0.32 1.5
11 6 0 -1 1.45
-12 -6 0 1.64 2.1
-12 -6 0 -1.75 2.19
-12 -6 0 1.76 2.22
12 6 0 1.06 1.44
12 6 0 2.18 1.74
12 6 0 -0.17 1.75
12 -7 0 -0.11 1.52
12 -7 0 -2.21 2.51
12 -7 0 -0.9 1.72
12 -7 0 1.03 1.59
12 -7 0 1.35 1.94
-12 7 0 4.31 2.67
-12 7 0 3.77 2.82
11 -7 0 9.6 2.13
11 -7 0 8.03 1.88
11 -7 0 7.36 1.67
11 -7 0 8.59 2.77
11 -7 0 2.62 1.6
11 -7 0 8.53 2.19
11 -7 0 8.46 1.68
-11 7 0 11.48 2.63
-11 7 0 14.85 2.88
-11 7 0 10.71 2.81
10 -7 0 -0.51 2.2
10 -7 0 1.95 1.29
10 -7 0 0.88 1.19
10 -7 0 -0.17 1
10 -7 0 1.07 1.8
-10 7 0 0.72 1.76
-10 7 0 3.07 1.95
-10 7 0 -0.7 1.87
-10 7 0 1.44 1.98
9 -7 0 0.77 1.79
9 -7 0 2.15 1.64
9 -7 0 -0.84 1.07
9 -7 0 0.31 1.06
-9 7 0 1.39 1.53
-9 7 0 2.31 2.05
-9 7 0 0.79 1.58
-9 7 0 2.62 1.78
8 -7 0 22.13 2.07
8 -7 0 20.13 2.18
8 -7 0 23.98 2.69
8 -7 0 23.5 2.93
-8 7 0 27.6 3.17
-8 7 0 29.59 3.1
-8 7 0 26.91 2.7
-8 7 0 25.05 2.72
7 -7 0 23.79 2.1
7 -7 0 23.64 2.3
7 -7 0 23.05 2.83
7 -7 0 26.54 2.64
7 -7 0 21.03 1.94
7 -7 0 25.69 2.38
-7 7 0 28.76 2.37
-7 7 0 29.06 2.65
-7 7 0 23.12 2.62
-7 7 0 22.82 2.81
6 -7 0 5.18 1.19
6 -7 0 5.63 1.06
6 -7 0 5.53 1.21
6 -7 0 4.01 0.81
6 -7 0 3.31 1.32
-6 7 0 6.61 1.65
-6 7 0 5.1 1.24
-6 7 0 6.1 1.33
-6 7 0 7.16 1.32
5 -7 0 2.04 1.02
5 -7 0 1.23 0.65
5 -7 0 2.08 1
5 -7 0 0.85 0.5
5 -7 0 1.33 0.93
-5 7 0 0.52 0.83
-5 7 0 3.87 1.1
-5 7 0 1.74 1.18
4 -7 0 65.75 4.36
4 -7 0 62.9 3.71
4 -7 0 60.08 4.17
4 -7 0 56.8 3.82
4 -7 0 62.57 4.07
-4 7 0 64.11 4
-4 7 0 64.77 3.88
-4 7 0 56.58 4.06
-4 7 0 60.75 3.86
3 -7 0 7.4 0.89
3 -7 0 1.2 0.82
3 -7 0 5.31 0.92
3 -7 0 1.21 0.65
3 -7 0 6.91 0.67
3 -7 0 1.42 1.02
3 -7 0 6.8 0.74
3 -7 0 3.19 1.02
-3 7 0 2.67 0.98
-3 7 0 5.37 0.97
-3 7 0 2.62 1
-3 7 0 0.99 0.7
-3 7 0 7.64 0.76
-3 7 0 1.58 0.59
-3 7 0 6.3 0.84
2 -7 0 20.88 1.33
2 -7 0 19.98 1.23
2 -7 0 21.74 2.18
2 -7 0 21.72 2.03
2 -7 0 18.33 1.54
2 -7 0 20.49 1.52
2 -7 0 20.93 1.6
2 -7 0 24.64 1.84
2 -7 0 20.91 1.67
2 -7 0 21.75 1.39
-2 7 0 23.55 1.73
-2 7 0 21.86 1.48
-2 7 0 21.9 1.67
-2 7 0 22.5 2.25
-2 7 0 19.54 2.03
-2 7 0 25.24 1.62
-2 7 0 23.62 1.61
1 -7 0 314.71 17.82
1 -7 0 306.21 18.27
1 -7 0 312.22 17.99
1 -7 0 320.86 18.49
1 -7 0 315.9 18.04
1 -7 0 302.09 17.99
1 -7 0 289.38 17.91
1 -7 0 323.95 17.86
-1 7 0 296.07 17.68
-1 7 0 311.24 17.49
-1 7 0 309.54 18.02
-1 7 0 310.39 17.84
-1 7 0 326.82 17.75
-1 7 0 282.14 17.46
-1 7 0 311.2 17.67
-1 7 0 310.23 17.59
-1 7 0 302.5 18.24
0 -7 0 0.37 0.53
0 -7 0 0.31 0.51
0 -7 0 0.5 0.93
0 -7 0 1.09 0.72
0 -7 0 -0.09 0.97
0 -7 0 -0.57 0.58
0 -7 0 -0.1 0.29
0 7 0 -0.45 0.57
0 7 0 -0.09 0.64
0 7 0 1.33 0.63
0 7 0 0.05 0.22
0 7 0 1.11 0.88
0 7 0 0.09 0.39
0 7 0 -0.34 1.05
-1 -7 0 304.73 17.71
-1 -7 0 293.54 17.74
-1 -7 0 298.44 17.55
-1 -7 0 295.1 18.18
-1 -7 0 311.88 17.96
-1 -7 0 309.22 17.51
-1 -7 0 292.51 17.57
-1 -7 0 325.69 17.5
1 7 0 321.24 18.32
1 7 0 321.82 18.59
1 7 0 314.97 18.31
1 7 0 312.87 18.85
1 7 0 315.08 18.25
1 7 0 324.98 18.17
1 7 0 298.4 18.2
1 7 0 314.42 18.09
-2 -7 0 21.81 1.49
-2 -7 0 17.54 1.58
-2 -7 0 24.08 1.62
-2 -7 0 20.34 1.54
-2 -7 0 22.18 1.48
-2 -7 0 26.1 2.66
-2 -7 0 22.68 2.29
-2 -7 0 22.03 2.1
2 7 0 22.04 1.94
2 7 0 20.79 1.4
2 7 0 19.23 1.52
2 7 0 22.03 1.45
2 7 0 18.82 1.58
2 7 0 19.95 1.6
2 7 0 21.57 2.14
2 7 0 20.63 1.84
2 7 0 26.83 2.75
2 7 0 23.88 1.41
-3 -7 0 5.75 0.74
-3 -7 0 1.68 0.93
-3 -7 0 3.39 0.73
-3 -7 0 1.35 0.58
-3 -7 0 3.48 0.66
-3 -7 0 1.32 0.59
-3 -7 0 2.1 0.44
-3 -7 0 -0.13 0.95
3 7 0 0.92 0.62
3 7 0 2.03 0.58
3 7 0 0.85 0.59
3 7 0 0.76 0.56
3 7 0 1.74 1.23
3 7 0 0.83 0.98
3 7 0 3.04 1.08
-4 -7 0 66.64 4.67
-4 -7 0 61.07 4.07
-4 -7 0 60.34 4.3
-4 -7 0 70.55 4.12
-4 -7 0 68.87 4.1
-4 -7 0 67.11 4.09
-4 -7 0 60.11 4.07
4 7 0 62.8 4.26
4 7 0 54.02 3.93
4 7 0 63.98 3.91
4 7 0 61.54 3.86
4 7 0 60.95 4.67
4 7 0 59.72 3.71
4 7 0 50.84 4.19
4 7 0 62.29 3.78
-5 -7 0 1.46 0.81
-5 -7 0 -0.33 0.77
-5 -7 0 1.53 0.85
-5 -7 0 1.65 0.97
-5 -7 0 0.5 0.76
5 7 0 1.52 0.65
5 7 0 2.06 1.02
5 7 0 1.05 0.77
5 7 0 1.03 1.34
5 7 0 2.06 0.83
-6 -7 0 6.96 1.29
-6 -7 0 5.31 1.36
-6 -7 0 5.65 1.23
-6 -7 0 8.65 1.39
-6 -7 0 5.59 1.31
6 7 0 2.71 1.57
6 7 0 3.79 0.88
6 7 0 6.18 1.06
6 7 0 7.61 1.23
-7 -7 0 30.26 2.94
-7 -7 0 24.13 2.65
-7 -7 0 32.76 2.74
-7 -7 0 32.58 2.98
7 7 0 21.98 2.2
7 7 0 25.64 2.08
7 7 0 30.64 3.27
7 7 0 20.79 2.25
-8 -7 0 28.52 2.81
-8 -7 0 26.43 2.88
-8 -7 0 25.97 2.76
8 7 0 24.14 2.51
8 7 0 24.75 3.2
8 7 0 24.5 2.27
8 7 0 23.49 2.35
-9 -7 0 1.47 1.69
-9 -7 0 1.85 1.68
-9 -7 0 0.59 1.65
9 7 0 0.48 1.09
9 7 0 -0.65 1.15
9 7 0 1.28 1.13
9 7 0 0.15 1.18
-10 -7 0 0.43 1.73
-10 -7 0 3.32 1.73
-10 -7 0 2.57 1.72
10 7 0 0.65 1.35
10 7 0 0.05 1.13
10 7 0 1.61 1.39
10 7 0 1.45 1.15
-11 -7 0 9.35 2.4
-11 -7 0 8.71 2.35
-11 -7 0 11.17 2.77
11 7 0 8.69 2.13
11 7 0 9.97 1.83
11 7 0 8.18 2.02
-12 -7 0 0.77 2.24
-12 -7 0 6.6 2.79
-12 -7 0 1.97 2.41
12 7 0 2.33 1.51
12 7 0 -1.17 1.89
12 7 0 3.51 1.77
12 -8 0 -0.39 2.03
12 -8 0 3.44 3.01
12 -8 0 0.63 1.76
12 -8 0 -1.29 1.24
-12 8 0 2.14 2.62
-12 8 0 -1.99 2.48
11 -8 0 0.38 1.25
11 -8 0 -0.33 1.77
11 -8 0 0.41 1.92
11 -8 0 -2.51 1.39
11 -8 0 0.65 2.26
-11 8 0 -1.58 2.47
-11 8 0 5.15 2.23
-11 8 0 1.72 2.32
10 -8 0 10.23 2.75
10 -8 0 4.36 1.5
10 -8 0 5.82 1.4
10 -8 0 8.03 2.19
-10 8 0 9.11 2.48
-10 8 0 8.06 2.54
-10 8 0 6.88 2.12
-10 8 0 11.25 2.27
9 -8 0 2.15 1.24
9 -8 0 -0.48 1.03
9 -8 0 5.11 2.14
9 -8 0 5.8 1.88
-9 8 0 3.46 1.98
-9 8 0 3.09 1.91
-9 8 0 2.27 1.62
-9 8 0 6.97 1.99
8 -8 0 11.55 2.19
8 -8 0 9.27 1.94
8 -8 0 7.4 1.27
8 -8 0 7.73 1.42
-8 8 0 10.15 2.25
-8 8 0 10.35 2.05
-8 8 0 9.31 1.76
-8 8 0 9.54 1.69
7 -8 0 4.27 1.4
7 -8 0 4.55 0.94
7 -8 0 5.39 1.73
7 -8 0 4.9 1.51
7 -8 0 2.67 1.11
-7 8 0 5.33 1.53
-7 8 0 8.27 1.57
-7 8 0 4.51 1.64
-7 8 0 3.54 1.37
6 -8 0 21.71 2.01
6 -8 0 28.79 2.49
6 -8 0 27.41 2.57
6 -8 0 24.77 2.45
6 -8 0 24.56 1.9
6 -8 0 24.92 2.76
-6 8 0 31.8 2.34
-6 8 0 27.02 2.25
-6 8 0 28.69 2.5
-6 8 0 25.27 2.69
5 -8 0 39.77 2.81
5 -8 0 43.34 3.09
5 -8 0 37.35 3.17
5 -8 0 42.25 2.65
5 -8 0 42.94 3.36
-5 8 0 46.83 3.08
-5 8 0 45.26 3.4
-5 8 0 46.58 3.12
-5 8 0 45.25 3.26
4 -8 0 18.89 2.24
4 -8 0 15.29 1.71
4 -8 0 15.45 1.2
4 -8 0 20.09 2.04
4 -8 0 17.28 1.5
4 -8 0 17.54 1.86
-4 8 0 19.31 1.56
-4 8 0 16.64 1.83
-4 8 0 19.48 1.71
-4 8 0 19.48 1.63
3 -8 0 66.5 3.83
3 -8 0 61.47 3.63
3 -8 0 59.39 4.48
3 -8 0 63.19 4.34
3 -8 0 61.23 3.91
3 -8 0 60.4 4.05
3 -8 0 62.06 3.73
3 -8 0 67.86 3.98
3 -8 0 56.59 3.97
-3 8 0 58.96 4.42
-3 8 0 63.51 3.87
-3 8 0 66.46 3.94
-3 8 0 66.91 4.05
-3 8 0 61.23 4.06
-3 8 0 67.5 3.92
-3 8 0 60.03 4.34
2 -8 0 48.02 3.32
2 -8 0 52.16 3.5
2 -8 0 53.03 4
2 -8 0 55.09 3.57
2 -8 0 59.46 3.93
2 -8 0 54.47 3.39
2 -8 0 52.8 3.38
2 -8 0 57.06 3.62
-2 8 0 54.15 3.99
-2 8 0 46.98 3.29
-2 8 0 55.31 3.31
-2 8 0 53.81 3.28
-2 8 0 50.11 3.39
-2 8 0 52.08 3.14
-2 8 0 59.78 3.81
-2 8 0 49.73 3.45
1 -8 0 87.06 5.08
1 -8 0 89.63 4.96
1 -8 0 77.3 4.89
1 -8 0 82.86 5.18
1 -8 0 83.27 5.14
1 -8 0 84.94 5.51
1 -8 0 80.55 5.69
1 -8 0 79.71 5.1
-1 8 0 81.72 5.6
-1 8 0 79.59 4.86
-1 8 0 84.65 5.35
-1 8 0 78.06 4.73
-1 8 0 78.38 4.9
-1 8 0 76.37 4.84
-1 8 0 81.09 4.62
-1 8 0 80.05 4.62
-1 8 0 81.84 5.07
0 -8 0 131.38 8.3
0 -8 0 124.92 7.95
0 -8 0 134.35 7.76
0 -8 0 137.34 7.86
0 -8 0 132.16 7.99
0 -8 0 132.03 7.92
0 -8 0 129.35 8.54
0 -8 0 140.83 7.93
0 8 0 135.52 8.18
0 8 0 141.09 8.59
0 8 0 146.85 8.1
0 8 0 139.95 8.26
0 8 0 130.22 7.92
0 8 0 134.44 8.89
0 8 0 139.59 8.21
-1 -8 0 84.16 4.89
-1 -8 0 82.3 5.19
-1 -8 0 77.71 4.93
-1 -8 0 74.14 4.96
-1 -8 0 84.96 4.87
-1 -8 0 80.33 5.12
-1 -8 0 86.47 5.78
-1 -8 0 83.65 5.45
1 8 0 84.33 5.24
1 8 0 80.5 5.97
1 8 0 89.45 5.13
1 8 0 80.16 5.04
1 8 0 92.63 5.33
1 8 0 85.4 5.65
1 8 0 85.79 5.28
-2 -8 0 52.54 3.25
-2 -8 0 50.74 3.16
-2 -8 0 45.94 3.64
-2 -8 0 42.55 3.24
-2 -8 0 53.41 3.79
-2 -8 0 58.47 4.18
-2 -8 0 57.12 3.3
-2 -8 0 56.38 3.24
2 8 0 51.11 3.14
2 8 0 55.8 3.17
2 8 0 51.17 3.37
2 8 0 49.24 3.19
2 8 0 52.36 3.4
2 8 0 54.43 4.26
2 8 0 52.28 3.59
2 8 0 53.39 3.35
2 8 0 59.63 3.66
2 8 0 51.96 3.88
-3 -8 0 64.97 3.92
-3 -8 0 64.22 3.73
-3 -8 0 60.55 3.79
-3 -8 0 59.35 4.71
-3 -8 0 64.01 3.84
-3 -8 0 58.94 4.33
-3 -8 0 59.04 3.81
3 8 0 62.57 4.38
3 8 0 57.84 4.68
3 8 0 65.57 3.87
3 8 0 58.77 3.66
3 8 0 56.08 3.77
3 8 0 61.82 4.19
3 8 0 59.16 3.68
3 8 0 61.98 3.7
3 8 0 58.49 3.86
-4 -8 0 17.73 2.02
-4 -8 0 19.35 1.68
-4 -8 0 22.08 2.57
-4 -8 0 19.39 1.74
-4 -8 0 21 1.67
-4 -8 0 20.27 1.66
4 8 0 15.58 1.53
4 8 0 16.41 1.58
4 8 0 16.01 1.39
4 8 0 18.17 1.45
4 8 0 13.47 1.56
4 8 0 17.05 2.5
-5 -8 0 39.98 2.97
-5 -8 0 44.01 2.99
-5 -8 0 43.8 2.98
-5 -8 0 40.32 2.99
-5 -8 0 41.86 2.94
5 8 0 41.66 2.91
5 8 0 32.94 2.96
5 8 0 42.72 2.83
5 8 0 40.53 2.68
5 8 0 42.3 3.83
-6 -8 0 27.08 2.33
-6 -8 0 25.85 2.43
-6 -8 0 28.25 2.53
-6 -8 0 27.44 2.53
6 8 0 24.37 1.97
6 8 0 24.32 2.06
6 8 0 21.32 2.22
6 8 0 23.53 2.59
6 8 0 30.8 3.42
-7 -8 0 6.13 1.44
-7 -8 0 5.7 1.53
-7 -8 0 8.19 1.77
-7 -8 0 5.48 1.56
7 8 0 4.41 1.81
7 8 0 3.95 1.02
7 8 0 5.43 1.73
7 8 0 4.7 1.23
7 8 0 4 1.19
-8 -8 0 8.37 1.79
-8 -8 0 11.52 1.97
-8 -8 0 14.08 2.09
8 8 0 6.38 1.43
8 8 0 12.59 2.55
8 8 0 9.69 1.39
8 8 0 5.8 1.46
-9 -8 0 5.75 1.88
-9 -8 0 4.43 1.64
-9 -8 0 3.29 1.73
9 8 0 0.9 1.06
9 8 0 2.24 1.1
9 8 0 2.31 1.38
9 8 0 3.21 1.32
-10 -8 0 8.36 2.17
-10 -8 0 9.88 2.39
-10 -8 0 6.66 2.03
10 8 0 3.26 1.66
10 8 0 8.19 1.7
10 8 0 5.35 1.66
-11 -8 0 1.9 2.25
-11 -8 0 -0.02 1.94
-11 -8 0 1.19 2.03
11 8 0 -2.28 1.45
11 8 0 2.23 1.44
11 8 0 -2.38 1.4
-12 -8 0 1.84 2.53
-12 -8 0 2.33 2.49
-12 -8 0 -1.32 2.39
12 8 0 0.63 1.67
12 8 0 -0.67 1.4
12 8 0 -0.29 1.65
12 -9 0 0.8 1.66
12 -9 0 2.46 2.07
12 -9 0 -0.56 1.77
12 -9 0 -4.62 2.19
-12 9 0 3.68 2.77
-12 9 0 -2 2.82
11 -9 0 4.06 2.16
11 -9 0 4.56 1.98
11 -9 0 2.45 1.66
11 -9 0 3.39 1.38
11 -9 0 5.88 2.83
-11 9 0 8.36 2.36
-11 9 0 9.49 2.69
-11 9 0 4.54 2.85
10 -9 0 -0.86 1.49
10 -9 0 -0.05 2.02
10 -9 0 -0.33 1.13
10 -9 0 -1.99 1.17
-10 9 0 -1.83 2.09
-10 9 0 -2.32 2.27
-10 9 0 1.01 1.76
-10 9 0 1.8 1.65
9 -9 0 9.59 2.67
9 -9 0 6.27 1.52
9 -9 0 6.98 1.33
9 -9 0 10.01 2.19
-9 9 0 7.05 1.92
-9 9 0 9.01 1.81
-9 9 0 10.66 2.46
-9 9 0 8.24 2.17
8 -9 0 0.23 0.88
8 -9 0 3.66 1.24
8 -9 0 1.73 1.72
8 -9 0 1.49 1.58
-8 9 0 2.63 1.61
-8 9 0 2.11 1.69
-8 9 0 2.74 1.58
-8 9 0 3.22 1.37
7 -9 0 -0.42 0.92
7 -9 0 0.87 1.42
7 -9 0 -0.2 1.42
7 -9 0 -1.77 0.66
7 -9 0 -1.36 1.2
-7 9 0 1.75 1.58
-7 9 0 0.3 1.28
-7 9 0 3.71 1.44
-7 9 0 0.1 1.15
6 -9 0 1.27 0.63
6 -9 0 2.25 1.35
6 -9 0 0.87 0.77
6 -9 0 1.85 1.27
6 -9 0 -0.21 1.18
-6 9 0 2.2 1.41
-6 9 0 1.71 1.04
-6 9 0 2.52 1.31
-6 9 0 1.54 1.1
5 -9 0 0.39 0.46
5 -9 0 0.69 0.78
5 -9 0 -0.76 1.12
5 -9 0 -0.93 1.1
5 -9 0 -0.6 0.93
5 -9 0 1.3 1.15
-5 9 0 3.78 0.92
4 -9 0 4.25 0.53
4 -9 0 5.05 0.88
4 -9 0 4.9 1.42
4 -9 0 4.58 1.18
4 -9 0 4.53 1.04
4 -9 0 5.08 1.35
-4 9 0 4.06 1.1
-4 9 0 2.99 1.16
-4 9 0 5.74 0.9
-4 9 0 4.63 0.82
-4 9 0 4.94 0.92
-4 9 0 4.35 1.08
3 -9 0 205.69 13.08
3 -9 0 235.12 12.88
3 -9 0 222.25 12.94
3 -9 0 228.01 12.77
3 -9 0 218.55 13.21
3 -9 0 237.55 13.22
3 -9 0 211.59 13.04
3 -9 0 225.69 13.32
3 -9 0 215.43 13.68
3 -9 0 230.74 13.51
-3 9 0 226.46 13.25
-3 9 0 226.98 13.44
-3 9 0 220.87 13.72
-3 9 0 214.93 13.84
-3 9 0 239.97 13.31
-3 9 0 244.27 13.36
-3 9 0 228.7 13.39
2 -9 0 10.07 1.23
2 -9 0 12.07 1.96
2 -9 0 12.93 1.5
2 -9 0 13.62 1.16
2 -9 0 13.61 1.53
2 -9 0 12.03 1.48
2 -9 0 15.01 1.92
2 -9 0 11.81 1.18
-2 9 0 12.22 0.94
-2 9 0 12.51 1.41
-2 9 0 11.5 1.37
-2 9 0 11.26 1.96
-2 9 0 11.95 1.69
-2 9 0 14.61 1.3
-2 9 0 12.93 1.23
1 -9 0 8.08 1.05
1 -9 0 7.53 1.12
1 -9 0 9.24 1.77
1 -9 0 9.43 0.83
1 -9 0 9.32 1.14
1 -9 0 8.95 1.21
1 -9 0 6.66 1.42
1 -9 0 8.62 0.84
-1 9 0 7.84 1.26
-1 9 0 7.05 0.98
-1 9 0 9.44 1.03
-1 9 0 9.48 0.86
-1 9 0 7.71 1.05
-1 9 0 6.93 1.41
-1 9 0 6.79 1.65
0 -9 0 0.18 0.37
0 -9 0 -0.68 0.49
0 -9 0 -0.1 0.95
0 -9 0 -0.6 0.91
0 -9 0 0.27 0.72
0 -9 0 0.36 0.49
0 -9 0 1.62 0.69
0 -9 0 0.23 0.75
0 9 0 -0.07 0.24
0 9 0 0.03 1.23
0 9 0 0.43 0.7
0 9 0 0.52 0.64
0 9 0 0.44 1.01
0 9 0 0.2 0.6
0 9 0 -0.37 0.41
-1 -9 0 8.88 0.91
-1 -9 0 8.06 1.05
-1 -9 0 9.55 1.89
-1 -9 0 7.22 0.83
-1 -9 0 9.88 1.62
-1 -9 0 11.57 1.42
-1 -9 0 7.51 0.94
-1 -9 0 9.35 1.41
1 9 0 9.72 1.22
1 9 0 8.4 0.85
1 9 0 8.08 1.23
1 9 0 6.97 1.79
1 9 0 9.59 1.21
1 9 0 8.59 0.91
1 9 0 6.32 1.32
-2 -9 0 11.07 1.21
-2 -9 0 14.91 2.29
-2 -9 0 12.15 1.05
-2 -9 0 13.34 1.83
-2 -9 0 11.23 1.68
-2 -9 0 11.03 1.16
-2 -9 0 11.61 1.14
-2 -9 0 11.32 1.17
2 9 0 9.56 0.84
2 9 0 11.3 2.14
2 9 0 13.8 1.67
2 9 0 13.57 1.29
2 9 0 10.66 0.89
2 9 0 13.67 1.87
2 9 0 12.39 1.35
2 9 0 14.28 1.27
2 9 0 11.74 0.94
2 9 0 13.79 1.57
-3 -9 0 227.83 12.92
-3 -9 0 198.05 13.53
-3 -9 0 219.75 13.45
-3 -9 0 223.34 12.93
-3 -9 0 222.69 13.86
-3 -9 0 234.58 12.86
3 9 0 233.05 13.22
3 9 0 226.24 13.69
3 9 0 236.43 14.32
3 9 0 246.85 13.15
3 9 0 221 13.37
3 9 0 203.41 13.29
3 9 0 227.61 13.37
3 9 0 226.96 13.16
-4 -9 0 3.29 0.93
-4 -9 0 4.55 0.66
-4 -9 0 6.53 1.59
-4 -9 0 5.71 0.92
-4 -9 0 5.72 0.94
-4 -9 0 4.69 1.29
4 9 0 4.75 1.76
4 9 0 3.73 0.82
4 9 0 5.21 0.95
4 9 0 5.69 0.85
4 9 0 3.67 0.89
4 9 0 4.68 0.86
-5 -9 0 0.3 1.01
-5 -9 0 -1.19 0.89
-5 -9 0 1.29 0.9
-5 -9 0 -0.3 0.77
-5 -9 0 -0.12 0.77
5 9 0 0.46 0.84
5 9 0 0.47 0.66
5 9 0 1.7 0.87
5 9 0 -1.34 1.33
5 9 0 1.12 0.68
-6 -9 0 4.11 1.12
-6 -9 0 0.45 1.12
-6 -9 0 1.91 1.1
6 9 0 0.89 0.74
6 9 0 2.86 1.17
6 9 0 0.43 0.89
6 9 0 0.13 1.54
6 9 0 1.38 0.85
-7 -9 0 2.97 1.27
-7 -9 0 1.59 1.3
-7 -9 0 2 1.36
7 9 0 1.8 0.97
7 9 0 -1.51 0.78
7 9 0 2.52 1.41
7 9 0 1.38 1.77
7 9 0 -0.77 0.99
-8 -9 0 2.41 1.43
-8 -9 0 1.09 1.56
-8 -9 0 5.47 1.65
8 9 0 1.33 1.01
8 9 0 0.84 1.2
8 9 0 2.84 2.02
8 9 0 1.87 1.2
8 9 0 1.75 1.09
-9 -9 0 12.53 2.31
-9 -9 0 11.58 2.28
-9 -9 0 14.27 2.36
9 9 0 12.21 1.66
9 9 0 9.96 2.3
9 9 0 11.6 1.81
9 9 0 9.71 1.83
-10 -9 0 -0.06 1.97
-10 -9 0 2.68 1.8
-10 -9 0 1.91 1.7
10 9 0 3.83 1.6
10 9 0 0.97 1.64
10 9 0 -0.08 1.1
-11 -9 0 0.37 2.23
-11 -9 0 1.56 2.13
-11 -9 0 4.53 2.18
11 9 0 7.28 2
11 9 0 2.11 1.47
11 9 0 3.85 1.74
-12 -9 0 1.55 2.57
-12 -9 0 -0.22 2.29
-12 -9 0 -1.5 2.4
12 9 0 -1.95 1.35
12 9 0 -1.6 1.54
12 9 0 0.52 1.77
12 -10 0 -3.34 2.69
12 -10 0 0.42 2.11
12 -10 0 -1.44 1.84
-12 10 0 1.55 2.74
-12 10 0 2.58 2.39
11 -10 0 0.59 1.55
11 -10 0 -0.98 1.71
11 -10 0 -1.1 2.28
-11 10 0 -2.72 2.16
-11 10 0 -1.57 2.25
-11 10 0 0.24 2.02
10 -10 0 16.55 2.3
10 -10 0 19.19 2.95
10 -10 0 16.11 2.66
10 -10 0 28.36 3.96
-10 10 0 22.84 2.83
-10 10 0 20.03 3.36
-10 10 0 34.32 3.43
-10 10 0 22.72 3.43
9 -10 0 -0.93 1.21
9 -10 0 2.16 1.81
9 -10 0 3.91 2.4
9 -10 0 -0.68 0.91
-9 10 0 1.53 1.74
-9 10 0 0.59 1.41
-9 10 0 2.43 2.21
-9 10 0 3.03 1.88
8 -10 0 3.09 1.18
8 -10 0 3.36 1.88
8 -10 0 3.91 1.02
8 -10 0 5.22 1.7
-8 10 0 3.58 1.6
-8 10 0 1.48 1.7
-8 10 0 7.32 1.98
-8 10 0 8.29 1.7
7 -10 0 -1.4 0.65
7 -10 0 -1.33 1.2
7 -10 0 -0.9 1
7 -10 0 -0.46 1.45
7 -10 0 1.68 1.49
-7 10 0 1.39 1.19
-7 10 0 -0.93 1
-7 10 0 -1.7 1.4
-7 10 0 -1.35 1.49
6 -10 0 9.64 1.65
6 -10 0 7.86 1.3
6 -10 0 8.7 1.83
6 -10 0 7.79 0.95
6 -10 0 6.49 1.72
-6 10 0 9.25 1.76
-6 10 0 8.08 1.44
-6 10 0 7.23 1.55
-6 10 0 8.56 1.37
5 -10 0 79.28 5.2
5 -10 0 82.07 5.46
5 -10 0 86.62 5.76
5 -10 0 82.72 4.94
5 -10 0 84.74 5.67
-5 10 0 91.14 5.4
-5 10 0 85.92 5.65
-5 10 0 81.83 5.33
-5 10 0 86.92 5.53
4 -10 0 7.59 0.68
4 -10 0 7.85 1.27
4 -10 0 9.82 1.58
4 -10 0 8.05 1.18
4 -10 0 8.26 1.66
4 -10 0 8 1.44
-4 10 0 9.05 1.54
-4 10 0 8.54 1.43
-4 10 0 7.99 1.04
-4 10 0 12.39 1.25
-4 10 0 7.57 1.54
-4 10 0 9.06 1.11
-4 10 0 9.96 1.35
3 -10 0 176.96 11.13
3 -10 0 181.49 10.51
3 -10 0 174.45 10.67
3 -10 0 185.32 10.85
3 -10 0 179.56 10.91
3 -10 0 183.19 10.67
-3 10 0 189.96 10.97
-3 10 0 203.71 10.95
-3 10 0 181.55 10.84
-3 10 0 180.03 11.43
-3 10 0 181.55 11.62
-3 10 0 187.1 11
-3 10 0 183.75 11.07
2 -10 0 92.51 6.53
2 -10 0 93.03 5.87
2 -10 0 95.11 5.63
2 -10 0 88.37 6.24
2 -10 0 94.75 5.77
2 -10 0 94.98 5.65
2 -10 0 94.37 5.9
-2 10 0 94.43 5.62
-2 10 0 96.55 6.21
-2 10 0 95.5 5.66
-2 10 0 81.87 5.75
-2 10 0 100.21 6.6
-2 10 0 90.93 5.42
1 -10 0 0.37 0.66
1 -10 0 2.73 1.17
1 -10 0 0.92 0.44
1 -10 0 -0.8 1.08
1 -10 0 1.85 0.47
1 -10 0 2.14 0.78
1 -10 0 0.86 0.66
1 -10 0 2.01 0.81
-1 10 0 1.21 0.95
-1 10 0 1.31 0.75
-1 10 0 0.79 0.72
-1 10 0 1.78 0.5
-1 10 0 1.31 0.7
-1 10 0 1.37 1.06
-1 10 0 1.15 1.32
0 -10 0 914.2 52.13
0 -10 0 918.24 52.59
0 -10 0 917.78 52.04
0 -10 0 897.89 52.21
0 -10 0 902.47 52.09
0 -10 0 935.35 52.94
0 -10 0 918.05 51.93
0 -10 0 869.98 52.15
0 10 0 953.18 52.71
0 10 0 898.71 53.24
0 10 0 924.09 52.49
0 10 0 911.33 52.78
0 10 0 903.1 52.81
0 10 0 968.94 52.94
0 10 0 890 53.6
-1 -10 0 1.38 0.59
-1 -10 0 3.07 0.83
-1 -10 0 0.55 1.22
-1 -10 0 1.34 0.92
-1 -10 0 1.64 0.6
-1 -10 0 1.51 0.97
-1 -10 0 1.36 0.48
-1 -10 0 1.12 1.15
1 10 0 2.72 0.87
1 10 0 1.87 0.82
1 10 0 2.06 0.85
1 10 0 0.61 1.4
1 10 0 0.8 1.07
1 10 0 2.63 0.57
1 10 0 1.66 0.58
-2 -10 0 101.83 6.51
-2 -10 0 90.29 5.24
-2 -10 0 84.37 5.36
-2 -10 0 86.03 5.37
-2 -10 0 88.82 6.03
-2 -10 0 81.72 5.8
2 10 0 93.66 5.4
2 10 0 97.45 5.83
2 10 0 98.51 5.97
2 10 0 91.5 6.79
2 10 0 93.53 5.73
2 10 0 92.38 5.69
2 10 0 91.88 5.51
2 10 0 90.42 5.49
-3 -10 0 186.56 10.52
-3 -10 0 178.93 11.32
-3 -10 0 179.01 10.58
-3 -10 0 179.17 11.62
-3 -10 0 178.07 11.22
3 10 0 188.68 10.9
3 10 0 189.12 10.94
3 10 0 182.83 10.65
3 10 0 187.02 11.94
3 10 0 190.59 10.61
3 10 0 186.81 10.71
3 10 0 161.79 10.8
-4 -10 0 5.68 1.82
-4 -10 0 6.98 1.59
-4 -10 0 9.34 1.19
-4 -10 0 10.25 1.19
-4 -10 0 9.26 1.14
-4 -10 0 9.39 0.9
4 10 0 8.37 1.12
4 10 0 9.91 1.28
4 10 0 7.81 2.04
4 10 0 8.54 1.03
4 10 0 8.1 1.18
4 10 0 8.3 0.94
-5 -10 0 88.79 5.47
-5 -10 0 87.58 6.22
-5 -10 0 89.33 5.43
-5 -10 0 87.06 5.79
-5 -10 0 79.33 5.4
5 10 0 82.91 5.13
5 10 0 80.1 4.99
5 10 0 85.35 5.21
5 10 0 88.77 6.35
5 10 0 69.02 4.96
-6 -10 0 6.64 1.4
-6 -10 0 7.72 1.54
-6 -10 0 6.7 1.32
6 10 0 8.08 1.37
6 10 0 8.38 1.19
6 10 0 6.26 2.13
6 10 0 7.82 1.35
6 10 0 6.15 1.31
-7 -10 0 -0.06 1.22
-7 -10 0 -0.17 1.14
-7 -10 0 1.06 1.34
7 10 0 -0.34 0.86
7 10 0 0.36 1.01
7 10 0 0.12 1.09
7 10 0 -0.55 1.83
-8 -10 0 7.96 1.8
-8 -10 0 3.71 1.52
-8 -10 0 7.29 1.71
8 10 0 0.76 1.91
8 10 0 3.35 1.3
8 10 0 4.97 1.25
8 10 0 6.51 1.22
8 10 0 5.63 1.5
-9 -10 0 0.95 1.75
-9 -10 0 1.38 1.7
-9 -10 0 1.95 1.75
9 10 0 -1.08 1.29
9 10 0 3.12 1.35
9 10 0 2.42 1.14
-10 -10 0 19.76 2.99
-10 -10 0 27.91 3.4
-10 -10 0 19.54 2.86
10 10 0 18.16 2.56
10 10 0 18.16 2.52
10 10 0 19.56 2.44
-11 -10 0 -4.07 2.06
-11 -10 0 5.58 2.09
-11 -10 0 -0.38 1.97
11 10 0 -0.07 1.78
11 10 0 -0.63 1.6
11 10 0 0.95 1.41
-12 -10 0 1.94 2.36
-12 -10 0 -0.57 2.14
-12 -10 0 -0.02 2.36
12 10 0 0.65 1.78
12 10 0 -0.31 1.49
12 10 0 -0.31 1.79
12 -11 0 6.74 2.55
12 -11 0 2.49 2.85
12 -11 0 2.75 1.96
-12 11 0 -0.05 2.57
-12 11 0 3.14 3.09
11 -11 0 -1.43 2.58
11 -11 0 2.51 2.12
11 -11 0 -1.17 1.43
-11 11 0 -2.06 2.2
-11 11 0 0.12 2.32
-11 11 0 1.65 2.03
10 -11 0 0.25 1.37
10 -11 0 2.91 2.03
10 -11 0 2.56 2.44
-10 11 0 -0.26 2.1
-10 11 0 0.5 1.68
-10 11 0 2.92 2.13
-10 11 0 1.57 1.98
9 -11 0 -0.94 1.23
9 -11 0 -0.71 0.88
9 -11 0 -2.7 1.6
9 -11 0 -1.01 1.83
-9 11 0 -0.37 1.73
-9 11 0 -1.8 1.76
-9 11 0 -2.72 1.27
-9 11 0 3.44 1.91
8 -11 0 7.29 1.87
8 -11 0 8.3 2.28
8 -11 0 6.98 1.51
8 -11 0 5.47 1.03
-8 11 0 2.97 2.06
-8 11 0 8.22 1.77
-8 11 0 6.9 1.69
-8 11 0 4.88 1.81
7 -11 0 3.83 1.81
7 -11 0 5.45 1.31
7 -11 0 7.45 2.01
7 -11 0 5.23 0.92
7 -11 0 3.3 1.67
-7 11 0 3.41 1.24
-7 11 0 6.54 1.64
-7 11 0 7.73 2.04
-7 11 0 8.74 1.54
6 -11 0 3.34 1.61
6 -11 0 6.26 1.27
6 -11 0 5.41 0.78
6 -11 0 4.35 1.6
6 -11 0 6.52 1.61
-6 11 0 9.91 1.88
-6 11 0 7.59 1.5
-6 11 0 6.45 1.18
-6 11 0 4.31 1.27
5 -11 0 0.32 1.32
5 -11 0 1.94 1.31
5 -11 0 -0.04 0.86
5 -11 0 0.16 0.39
5 -11 0 0.09 1.05
-5 11 0 2.2 1.04
-5 11 0 0.91 1.08
-5 11 0 1.97 0.89
-5 11 0 0.46 0.82
4 -11 0 0.69 0.91
4 -11 0 0.9 0.3
4 -11 0 0.83 1.32
4 -11 0 -1.51 1.02
4 -11 0 2.28 0.8
4 -11 0 0.49 1.11
-4 11 0 0.74 1.03
-4 11 0 0.92 0.85
-4 11 0 -0.79 1.13
-4 11 0 -0.2 0.66
-4 11 0 2.6 1.31
-4 11 0 0.35 0.62
3 -11 0 8.43 1.42
3 -11 0 5.46 1.61
3 -11 0 7.97 0.89
3 -11 0 6.77 1.11
3 -11 0 7.44 1.08
3 -11 0 8.06 1.44
-3 11 0 7.57 1.07
-3 11 0 8.13 1.08
-3 11 0 9.5 0.91
-3 11 0 5.72 1.58
-3 11 0 9.38 1.27
-3 11 0 5.93 1.78
2 -11 0 296.96 16.78
2 -11 0 293.01 16.76
2 -11 0 286.58 17.03
2 -11 0 284.12 16.9
2 -11 0 285.56 17.04
2 -11 0 290.1 17.46
-2 11 0 287.61 16.57
-2 11 0 302.71 16.82
-2 11 0 288.96 17.34
-2 11 0 282.57 17.68
-2 11 0 274.7 16.9
-2 11 0 294.76 16.76
1 -11 0 38.74 2.46
1 -11 0 37.03 2.75
1 -11 0 40.02 2.75
1 -11 0 38.45 2.41
1 -11 0 38.74 2.85
1 -11 0 33.27 3.33
-1 11 0 37.75 2.68
-1 11 0 38.79 2.97
-1 11 0 38.38 2.68
-1 11 0 42.33 3.88
-1 11 0 37.64 3.32
-1 11 0 35.44 2.39
0 -11 0 0.9 0.48
0 -11 0 0.58 1.23
0 -11 0 1.59 0.94
0 -11 0 2.72 0.89
0 -11 0 0.54 0.68
0 -11 0 0.72 0.91
0 11 0 0.26 0.74
0 11 0 0.06 0.86
0 11 0 0.54 0.3
0 11 0 0.51 1.12
0 11 0 0.6 1.45
0 11 0 0.95 0.65
-1 -11 0 36.61 3.71
-1 -11 0 43.87 2.65
-1 -11 0 33.54 3.39
-1 -11 0 40.42 2.86
-1 -11 0 38.91 2.58
-1 -11 0 39.11 3
1 11 0 44.91 3.3
1 11 0 40.91 2.8
1 11 0 39.95 3.02
1 11 0 45.11 4.18
-2 -11 0 293.84 17.21
-2 -11 0 265 16.52
-2 -11 0 273.13 16.06
-2 -11 0 258.55 16.08
-2 -11 0 285.24 15.94
-2 -11 0 285.59 16.76
2 11 0 303.6 17.2
2 11 0 296.62 17.32
2 11 0 297.78 17
2 11 0 294.45 16.87
2 11 0 286.76 18.3
2 11 0 285.04 17.22
2 11 0 301.06 17.01
-3 -11 0 6.59 0.91
-3 -11 0 9.8 1.94
-3 -11 0 8.61 1.75
-3 -11 0 7.83 0.9
-3 -11 0 8.78 2.1
3 11 0 9.06 1.16
3 11 0 7.89 0.75
3 11 0 6.39 1.06
3 11 0 7.74 1.28
3 11 0 8.84 0.93
3 11 0 8.24 0.81
3 11 0 7.78 2.19
-4 -11 0 1.38 1.47
-4 -11 0 0.36 1.18
-4 -11 0 1.14 0.47
-4 -11 0 0.85 0.74
-4 -11 0 1.44 0.75
-4 -11 0 0.28 0.68
4 11 0 0.18 0.78
4 11 0 1.35 0.81
4 11 0 -1.8 1.46
4 11 0 0.55 0.58
4 11 0 1.03 0.81
4 11 0 1.2 0.46
-5 -11 0 0.12 0.81
-5 -11 0 0.62 0.86
-5 -11 0 0.76 0.93
-5 -11 0 0.86 1.45
-5 -11 0 -0.53 1.18
5 11 0 0.14 0.58
5 11 0 0.3 0.77
5 11 0 -0.41 0.78
5 11 0 -0.24 1.61
5 11 0 -0.28 0.83
-6 -11 0 4.11 1.34
-6 -11 0 8.36 1.4
-6 -11 0 6.39 1.44
-6 -11 0 8.38 1.41
-6 -11 0 4.41 1.26
6 11 0 6.22 1.25
6 11 0 2.61 1.01
6 11 0 2.94 1
6 11 0 5.33 2.22
6 11 0 7.75 1.34
-7 -11 0 8.23 1.66
-7 -11 0 8.48 1.67
-7 -11 0 6.27 1.53
7 11 0 5.56 1.41
7 11 0 5.52 2.35
7 11 0 6.29 1.45
7 11 0 4.3 1.13
-8 -11 0 10.77 1.89
-8 -11 0 9.68 2.05
-8 -11 0 6.14 1.81
8 11 0 7.01 1.2
8 11 0 7.5 1.57
8 11 0 6.79 1.35
8 11 0 6.52 1.56
8 11 0 7.57 2.59
-9 -11 0 -0.18 1.46
-9 -11 0 2.62 1.68
-9 -11 0 1.72 1.51
9 11 0 0.83 1.11
9 11 0 -0.96 1.24
-10 -11 0 0.14 1.98
-10 -11 0 1.86 2.06
-10 -11 0 0.72 1.65
10 11 0 -1.87 1.4
10 11 0 0.42 1.33
10 11 0 1.84 1.59
-11 -11 0 4.3 2.26
-11 -11 0 1.04 2.07
-11 -11 0 -0.33 1.98
11 11 0 0.18 1.46
11 11 0 -0.18 1.63
11 11 0 0.21 1.67
-12 -11 0 2.52 2.65
-12 -11 0 -2.28 2.05
-12 -11 0 1.9 2.4
12 11 0 2.61 1.81
12 11 0 2.25 1.7
12 11 0 -0.68 1.78
12 -12 0 0.49 2.08
12 -12 0 -0.75 2.15
12 -12 0 -0.78 2.45
-12 12 0 2.9 2.83
-12 12 0 2.49 2.75
11 -12 0 5.11 2.87
11 -12 0 -4.38 1.63
-11 12 0 -2.48 2.22
-11 12 0 1.8 2.09
-11 12 0 -3.39 1.95
10 -12 0 0.47 1.5
10 -12 0 4.46 2.16
10 -12 0 -0.29 2.28
-10 12 0 2.66 2.09
-10 12 0 2 1.88
-10 12 0 1.84 2.59
-10 12 0 -0.57 1.75
9 -12 0 2.42 1.92
9 -12 0 2.49 1.45
9 -12 0 2.53 2.26
-9 12 0 0.5 1.79
[truncated: 5,738,612 more chars]
