# Supplementary material for: Improved Access to Chiral Tetranaphthoazepinium-Based Organocatalysts Using Aqueous Ammonia as Nitrogen Source
Source: Molecules. 2019 Oct 25;24(21):3844. doi: 10.3390/molecules24213844 (PMC6864439; doi:10.3390/molecules24213844)
Supplement: Supplementary file 1 [file molecules-24-03844-s001.zip › 1e_prime_CCDC_1956063.cif]

data_miwi_w2017_9_12_c2
_publ_requested_journal          Catalysts
_publ_contact_author_name        'Michael Widhalm'
_publ_contact_author_address     
;Institute of Chemical Catalysis
University of Vienna
Waehringerstr. 38
1090 Vienna
Austria
;
_publ_contact_author_email       m.widhalm@univie.ac.at
_publ_contact_author_phone       '+43 14277 70305'
loop_
_publ_author_name
_publ_author_address
'Manaprasertsak, Auraya'
;Department of Chemistry
Faculty of Science
Kasetsart University
Bangkok 10900
Thailand
;
'Tharamak, Sorachat'
;Department of Chemistry
Faculty of Science
Kasetsart University
Bangkok 10900
Thailand
;
'Schedl, Christina'
;Institute of Organic Chemistry
University of Vienna
Waehringerstr. 38 
1090 Vienna
Austria
;
'Roller, Alexander'
;Institute of Inorganic Chemistry
University of Vienna
Waehringerstr. 42 
1090 Vienna 
Austria
;
_audit_creation_date             2019-09-24
_audit_creation_method           
;
Olex2 1.2
(compiled 2018.05.29 svn.r3508 for OlexSys, GUI svn.r5506)
;
_shelxl_version_number           2013-2
_audit_contact_author_address    ?
_audit_contact_author_email      ?
_audit_contact_author_phone      ?
_publ_contact_author_id_orcid    ?
_publ_section_references         
;
Dolomanov, O.V., Bourhis, L.J., Gildea, R.J, Howard, J.A.K. & Puschmann, H.
 (2009), J. Appl. Cryst. 42, 339-341.

Sheldrick, G.M. (2008). Acta Cryst. A64, 112-122.

Sheldrick, G.M. (2015). Acta Cryst. C71, 3-8.

C. B. Huebschle, G. M. Sheldrick and B. Dittrich
ShelXle: a Qt graphical user interface for SHELXL
J. Appl. Cryst., 44, (2011) 1281-1284.

A.L.Spek, Acta Cryst. 2009, D65, 148-155.
;
_chemical_name_systematic        
;
(R)-2',6'-Bis(4-tritylphenyl)-3',5,5',7-tetrahydrospiro[dibenzo
[c,e]azepine-6,4'-dinaphtho[2,1-c:1',2'-e]azepin]-6-ium bromide
;
_chemical_name_common            ?
_chemical_formula_moiety         '0.5(Br), C43 H32 N0.5, 1.33(C6 H6), C7 H8'
_chemical_formula_sum            'C58 H48 Br0.50 N0.50'
_chemical_formula_weight         791.92
_space_group_crystal_system      monoclinic
_space_group_IT_number           5
_space_group_name_H-M_alt        'C 2'
_space_group_name_Hall           'C 2y'
_chemical_absolute_configuration ad
loop_
_space_group_symop_operation_xyz
'x, y, z'
'-x, y, -z'
'x+1/2, y+1/2, z'
'-x+1/2, y+1/2, -z'
_chemical_melting_point          ?
_exptl_crystal_description       block
_exptl_crystal_colour            'clear colourless'
_diffrn_ambient_temperature      150
loop_
_atom_type_symbol
_atom_type_description
_atom_type_scat_dispersion_real
_atom_type_scat_dispersion_imag
_atom_type_scat_source
C C 0.0033 0.0016 'International Tables Vol C Tables 4.2.6.8 and 6.1.1.4'
H H 0.0000 0.0000 'International Tables Vol C Tables 4.2.6.8 and 6.1.1.4'
Br Br -0.2901 2.4595 'International Tables Vol C Tables 4.2.6.8 and 6.1.1.4'
N N 0.0061 0.0033 'International Tables Vol C Tables 4.2.6.8 and 6.1.1.4'

_shelx_space_group_comment       
;
The symmetry employed for this shelxl refinement is uniquely defined
by the following loop, which should always be used as a source of
symmetry information in preference to the above space-group names.
They are only intended as comments.
;

_cell_length_a                   21.7990(14)
_cell_length_b                   23.2291(13)
_cell_length_c                   8.8684(5)
_cell_angle_alpha                90
_cell_angle_beta                 94.251(2)
_cell_angle_gamma                90
_cell_volume                     4478.3(5)
_cell_formula_units_Z            4
_cell_measurement_reflns_used    9974
_cell_measurement_temperature    150
_cell_measurement_theta_max      30.262
_cell_measurement_theta_min      2.303
_shelx_estimated_absorpt_T_max   0.951
_shelx_estimated_absorpt_T_min   0.883
_exptl_absorpt_coefficient_mu    0.510
_exptl_absorpt_correction_T_max  0.7460
_exptl_absorpt_correction_T_min  0.5749
_exptl_absorpt_correction_type   multi-scan
_exptl_absorpt_process_details   
;
SADABS-2016/2 (Bruker,2016/2) was used for absorption correction. 
wR2(int) was 0.1025 before and 0.0393 after correction. 
The Ratio of minimum to maximum transmission is 0.7706. 
The \l/2 correction factor is Not present.
;
_exptl_crystal_colour_lustre     clear
_exptl_crystal_colour_primary    colourless
_exptl_crystal_density_diffrn    1.175
_exptl_crystal_density_meas      ?
_exptl_crystal_density_method    ?
_exptl_crystal_F_000             1668
_exptl_crystal_preparation       ?
_exptl_crystal_size_max          0.25
_exptl_crystal_size_mid          0.23
_exptl_crystal_size_min          0.1
_exptl_special_details           
;
 ?
;
_exptl_transmission_factor_max   ?
_exptl_transmission_factor_min   ?
_diffrn_reflns_av_R_equivalents  0.0294
_diffrn_reflns_av_unetI/netI     0.0300
_diffrn_reflns_Laue_measured_fraction_full 0.996
_diffrn_reflns_Laue_measured_fraction_max 0.991
_diffrn_reflns_limit_h_max       29
_diffrn_reflns_limit_h_min       -30
_diffrn_reflns_limit_k_max       32
_diffrn_reflns_limit_k_min       -32
_diffrn_reflns_limit_l_max       12
_diffrn_reflns_limit_l_min       -12
_diffrn_reflns_number            43599
_diffrn_reflns_point_group_measured_fraction_full 0.997
_diffrn_reflns_point_group_measured_fraction_max 0.987
_diffrn_reflns_theta_full        25.242
_diffrn_reflns_theta_max         30.296
_diffrn_reflns_theta_min         1.283
_diffrn_detector_area_resol_mean ?
_diffrn_measured_fraction_theta_full 0.996
_diffrn_measured_fraction_theta_max 0.991
_diffrn_measurement_device_type  'Bruker APEX-II CCD'
_diffrn_measurement_method       '\f and \w scans'
_diffrn_radiation_probe          x-ray
_diffrn_radiation_type           MoK\a
_diffrn_radiation_wavelength     0.71073
_diffrn_source                   'sealed xray tube'
_diffrn_source_type              'Incoatec IuS'
_diffrn_special_details          ?
_diffrn_standards_number         0
_reflns_Friedel_coverage         0.948
_reflns_Friedel_fraction_full    0.997
_reflns_Friedel_fraction_max     0.983
_reflns_number_gt                12206
_reflns_number_total             13255
_reflns_special_details          
;
 Reflections were merged by SHELXL according to the crystal
 class for the calculation of statistics and refinement.
 
 _reflns_Friedel_fraction is defined as the number of unique
 Friedel pairs measured divided by the number that would be
 possible theoretically, ignoring centric projections and
 systematic absences.
;
_reflns_threshold_expression     'I > 2\s(I)'
_computing_cell_refinement       'SAINT V8.38A (?, 2016)'
_computing_data_collection       APEX3
_computing_data_reduction        'SAINT V8.38A (?, 2016)'
_computing_molecular_graphics    'Olex2 (Dolomanov et al., 2009)'
_computing_publication_material  'Olex2 (Dolomanov et al., 2009)'
_computing_structure_refinement  'ShelXL (Sheldrick, 2015)'
_computing_structure_solution    'ShelXS (Sheldrick, 2008)'
_refine_diff_density_max         1.487
_refine_diff_density_min         -0.645
_refine_diff_density_rms         0.160
_refine_ls_abs_structure_details 
;
 Flack x determined using 5476 quotients [(I+)-(I-)]/[(I+)+(I-)]
 (Parsons and Flack (2004), Acta Cryst. A60, s61).
;
_refine_ls_abs_structure_Flack   0.036(5)
_refine_ls_extinction_coef       .
_refine_ls_extinction_method     none
_refine_ls_goodness_of_fit_ref   1.048
_refine_ls_hydrogen_treatment    constr
_refine_ls_matrix_type           full
_refine_ls_number_parameters     450
_refine_ls_number_reflns         13255
_refine_ls_number_restraints     32
_refine_ls_R_factor_all          0.0876
_refine_ls_R_factor_gt           0.0802
_refine_ls_restrained_S_all      1.064
_refine_ls_shift/su_max          0.000
_refine_ls_shift/su_mean         0.000
_refine_ls_structure_factor_coef Fsqd
_refine_ls_weighting_details     
;
 w=1/[\s^2^(Fo^2^)+(0.1825P)^2^+2.6917P]
 where P=(Fo^2^+2Fc^2^)/3
;
_refine_ls_weighting_scheme      calc
_refine_ls_wR_factor_gt          0.2193
_refine_ls_wR_factor_ref         0.2295
_refine_special_details          

;
_olex2_refinement_description
1. Fixed Uiso
 At 1.2 times of:
  All C(H) groups, All C(H,H) groups
 At 1.5 times of:
  All C(H,H,H) groups
2. Restrained distances
 C4S-C3S \\sim C2S_$1-C3S \\sim C1S_$1-C2S_$1 \\sim C1S_$1-C6S_$1 \\sim
C6S_$1-C5S_$1 \\sim C5S_$1-
 C4S
 with sigma of 0.02
 C6S-C5S \\sim C1S-C6S \\sim C1S-C2S \\sim C2S-C3S_$1 \\sim C4S_$1-C3S_$1 \\sim
C5S-C4S_$1
 with sigma of 0.02
3. Uiso/Uaniso restraints and constraints
Uanis(C23S) = Uanis(C21S) = Uanis(C20S) = Uanis(C25S) = Uanis(C22S) =
Uanis(C19S) = Uanis(C24S) = Uanis(C12S) = Uanis(C8S) = Uanis(C9S) = Uanis(C7S)
= Uanis(C10S) = Uanis(C11S) = Uanis(C13S) = Uanis(C18S) = Uanis(C17S) =
Uanis(C14S) = Uanis(C16S) = Uanis(C15S) = Uanis(C26S) = Uanis(C27S) =
Uanis(C31S) = Uanis(C28S) = Uanis(C30S) = Uanis(C29S) = Uanis(C2S) = Uanis(C1S)
= Uanis(C6S) = Uanis(C5S) = Uanis(C4S) = Uanis(C3S)
4. Others
 1*[Sof(C27S)+Sof(H27S)+Sof(C28S)+Sof(H28S)+Sof(C29S)+Sof(H29S)+Sof(C30S)+
 Sof(H30S)+Sof(C31S)+Sof(H31S)+Sof(C26S)+Sof(C21S)+Sof(H21S)+Sof(C20S)+
 Sof(H20S)+Sof(C19S)+Sof(C24S)+Sof(H24S)+Sof(C23S)+Sof(H23S)+Sof(C22S)+
 Sof(H22S)+Sof(C25S)+Sof(H25A)+Sof(H25B)+Sof(H25C)+Sof(C32S)+Sof(H32A)+
 Sof(H32B)+Sof(H32C)]+1*[Sof(C18S)+Sof(H18S)+Sof(C13S)+Sof(H13S)+Sof(C14S)+
 Sof(H14S)+Sof(C15S)+Sof(H15S)+Sof(C16S)+Sof(H16S)+Sof(C17S)+Sof(H17S)+Sof(C8S)+
 Sof(H8S)+Sof(C9S)+Sof(H9S)+Sof(C10S)+Sof(H10S)+Sof(C11S)+Sof(H11S)+Sof(C12S)+
 Sof(H12S)+Sof(C7S)+Sof(H7S)]=0.7 with esd of 0.02
 Sof(C27S)=Sof(H27S)=Sof(C28S)=Sof(H28S)=Sof(C29S)=Sof(H29S)=Sof(C30S)=
 Sof(H30S)=Sof(C31S)=Sof(H31S)=Sof(C26S)=Sof(C32S)=Sof(H32A)=Sof(H32B)=
 Sof(H32C)=1-FVAR(1)
 Sof(C21S)=Sof(H21S)=Sof(C20S)=Sof(H20S)=Sof(C19S)=Sof(C24S)=Sof(H24S)=
 Sof(C23S)=Sof(H23S)=Sof(C22S)=Sof(H22S)=Sof(C25S)=Sof(H25A)=Sof(H25B)=
 Sof(H25C)=FVAR(1)
 Sof(C8S)=Sof(H8S)=Sof(C9S)=Sof(H9S)=Sof(C10S)=Sof(H10S)=Sof(C11S)=Sof(H11S)=
 Sof(C12S)=Sof(H12S)=Sof(C7S)=Sof(H7S)=1-FVAR(2)
 Sof(C18S)=Sof(H18S)=Sof(C13S)=Sof(H13S)=Sof(C14S)=Sof(H14S)=Sof(C15S)=
 Sof(H15S)=Sof(C16S)=Sof(H16S)=Sof(C17S)=Sof(H17S)=FVAR(2)
 Fixed Sof: C3S(0.33333) H3S(0.33333) C4S(0.33333) H4S(0.33333) C5S(0.33333)
 H5S(0.33333) C6S(0.33333) H6S(0.33333) C1S(0.33333) H1S(0.33333) C2S(0.33333)
 H2S(0.33333)
5.a Secondary CH2 refined with riding coordinates:
 C11(H11A,H11B), C13(H13A,H13B)
5.b Aromatic/amide H refined with riding coordinates:
 C24(H24), C26(H26), C27(H27), C28(H28), C29(H29), C32(H32), C33(H33),
 C35(H35), C36(H36), C39(H39), C40(H40), C41(H41), C42(H42), C43(H43), C45(H45),
  C46(H46), C47(H47), C48(H48), C49(H49), C51(H51), C52(H52), C53(H53),
 C54(H54), C55(H55), C93(H93), C94(H94), C95(H95), C96(H96), C18S(H18S),
 C13S(H13S), C14S(H14S), C15S(H15S), C16S(H16S), C17S(H17S), C27S(H27S),
 C28S(H28S), C29S(H29S), C30S(H30S), C31S(H31S), C21S(H21S), C20S(H20S),
 C24S(H24S), C23S(H23S), C22S(H22S), C8S(H8S), C9S(H9S), C10S(H10S), C11S(H11S),
  C12S(H12S), C7S(H7S), C3S(H3S), C4S(H4S), C5S(H5S), C6S(H6S), C1S(H1S),
 C2S(H2S)
5.c Fitted hexagon refined as free rotating group:
 C18S(C13S,C14S,C15S,C16S,C17S), C27S(C28S,C29S,C30S,C31S,C26S), C21S(C20S,
 C19S,C24S,C23S,C22S), C8S(C9S,C10S,C11S,C12S,C7S), C3S(C4S,C5S,C6S,C1S,C2S)
5.d Idealised Me refined as rotating group:
 C25S(H25A,H25B,H25C), C32S(H32A,H32B,H32C)
;
_atom_sites_solution_hydrogens   geom
_atom_sites_solution_primary     direct
_atom_sites_solution_secondary   ?
loop_
_atom_site_label
_atom_site_type_symbol
_atom_site_fract_x
_atom_site_fract_y
_atom_site_fract_z
_atom_site_U_iso_or_equiv
_atom_site_adp_type
_atom_site_occupancy
_atom_site_site_symmetry_order
_atom_site_calc_flag
_atom_site_refinement_flags_posn
_atom_site_refinement_flags_adp
_atom_site_refinement_flags_occupancy
_atom_site_disorder_assembly
_atom_site_disorder_group
Br1 Br 0.5000 0.25576(2) 0.5000 0.03205(18) Uani 1 2 d S T P . .
N1 N 0.5000 0.30363(16) 1.0000 0.0146(7) Uani 1 2 d S T P . .
C11 C 0.44766(15) 0.26554(12) 1.0490(4) 0.0166(6) Uani 1 1 d . . . . .
H11A H 0.4594 0.2490 1.1498 0.020 Uiso 1 1 calc R . . . .
H11B H 0.4103 0.2893 1.0572 0.020 Uiso 1 1 calc R . . . .
C13 C 0.52361(17) 0.34096(14) 1.1328(4) 0.0191(6) Uani 1 1 d . . . . .
H13A H 0.5277 0.3167 1.2247 0.023 Uiso 1 1 calc R . . . .
H13B H 0.5652 0.3550 1.1137 0.023 Uiso 1 1 calc R . . . .
C21 C 0.47325(14) 0.17050(13) 0.9419(4) 0.0150(5) Uani 1 1 d . . . . .
C22 C 0.43363(15) 0.21769(13) 0.9377(4) 0.0167(6) Uani 1 1 d . . . . .
C23 C 0.38363(16) 0.22136(15) 0.8247(4) 0.0196(6) Uani 1 1 d . . . . .
C24 C 0.37419(17) 0.17737(17) 0.7212(4) 0.0223(7) Uani 1 1 d . . . . .
H24 H 0.3404 0.1795 0.6473 0.027 Uiso 1 1 calc R . . . .
C25 C 0.41374(17) 0.12921(15) 0.7227(4) 0.0199(6) Uani 1 1 d . . . . .
C26 C 0.4039(2) 0.08405(18) 0.6158(4) 0.0251(7) Uani 1 1 d . . . . .
H26 H 0.3699 0.0863 0.5426 0.030 Uiso 1 1 calc R . . . .
C27 C 0.4420(2) 0.03756(18) 0.6156(5) 0.0288(8) Uani 1 1 d . . . . .
H27 H 0.4341 0.0074 0.5444 0.035 Uiso 1 1 calc R . . . .
C28 C 0.4933(2) 0.03462(16) 0.7221(5) 0.0261(7) Uani 1 1 d . . . . .
H28 H 0.5200 0.0024 0.7220 0.031 Uiso 1 1 calc R . . . .
C29 C 0.50488(18) 0.07781(14) 0.8258(4) 0.0203(6) Uani 1 1 d . . . . .
H29 H 0.5405 0.0756 0.8943 0.024 Uiso 1 1 calc R . . . .
C30 C 0.46457(16) 0.12578(14) 0.8327(4) 0.0169(6) Uani 1 1 d . . . . .
C31 C 0.34480(17) 0.27398(17) 0.8064(5) 0.0236(7) Uani 1 1 d . . . . .
C32 C 0.3070(2) 0.2928(2) 0.9165(5) 0.0330(10) Uani 1 1 d . . . . .
H32 H 0.3017 0.2694 1.0026 0.040 Uiso 1 1 calc R . . . .
C33 C 0.2769(2) 0.3454(2) 0.9014(6) 0.0390(11) Uani 1 1 d . . . . .
H33 H 0.2512 0.3574 0.9775 0.047 Uiso 1 1 calc R . . . .
C34 C 0.28352(19) 0.38115(19) 0.7769(5) 0.0281(8) Uani 1 1 d . . . . .
C35 C 0.3185(2) 0.36024(18) 0.6628(4) 0.0264(7) Uani 1 1 d . . . . .
H35 H 0.3218 0.3825 0.5739 0.032 Uiso 1 1 calc R . . . .
C36 C 0.34845(17) 0.30778(17) 0.6765(4) 0.0220(6) Uani 1 1 d . . . . .
H36 H 0.3717 0.2945 0.5970 0.026 Uiso 1 1 calc R . . . .
C37 C 0.2495(2) 0.4389(2) 0.7542(5) 0.0338(10) Uani 1 1 d . . . . .
C38 C 0.1925(3) 0.4223(3) 0.6485(6) 0.0435(13) Uani 1 1 d . . . . .
C39 C 0.1424(3) 0.3972(4) 0.7096(10) 0.0612(18) Uani 1 1 d . . . . .
H39 H 0.1415 0.3934 0.8160 0.073 Uiso 1 1 calc R . . . .
C40 C 0.0924(4) 0.3771(4) 0.6121(13) 0.074(2) Uani 1 1 d . . . . .
H40 H 0.0578 0.3600 0.6531 0.088 Uiso 1 1 calc R . . . .
C41 C 0.0944(5) 0.3826(4) 0.4577(13) 0.079(3) Uani 1 1 d . . . . .
H41 H 0.0608 0.3697 0.3920 0.095 Uiso 1 1 calc R . . . .
C42 C 0.1435(5) 0.4059(4) 0.4007(10) 0.072(3) Uani 1 1 d . . . . .
H42 H 0.1444 0.4089 0.2941 0.086 Uiso 1 1 calc R . . . .
C43 C 0.1932(4) 0.4261(3) 0.4922(7) 0.0531(17) Uani 1 1 d . . . . .
H43 H 0.2277 0.4424 0.4483 0.064 Uiso 1 1 calc R . . . .
C44 C 0.2325(2) 0.4661(3) 0.9046(5) 0.0381(11) Uani 1 1 d . . . . .
C45 C 0.1780(3) 0.4966(3) 0.9164(6) 0.0504(16) Uani 1 1 d . . . . .
H45 H 0.1484 0.4983 0.8324 0.060 Uiso 1 1 calc R . . . .
C46 C 0.1665(3) 0.5246(4) 1.0506(7) 0.062(2) Uani 1 1 d . . . . .
H46 H 0.1285 0.5441 1.0579 0.075 Uiso 1 1 calc R . . . .
C47 C 0.2088(3) 0.5244(4) 1.1710(6) 0.061(2) Uani 1 1 d . . . . .
H47 H 0.2004 0.5435 1.2619 0.073 Uiso 1 1 calc R . . . .
C48 C 0.2643(3) 0.4964(4) 1.1603(6) 0.058(2) Uani 1 1 d . . . . .
H48 H 0.2941 0.4962 1.2440 0.070 Uiso 1 1 calc R . . . .
C49 C 0.2762(3) 0.4685(3) 1.0284(6) 0.0480(15) Uani 1 1 d . . . . .
H49 H 0.3150 0.4506 1.0213 0.058 Uiso 1 1 calc R . . . .
C50 C 0.2904(3) 0.4848(2) 0.6870(5) 0.0345(10) Uani 1 1 d . . . . .
C51 C 0.2632(4) 0.5318(3) 0.6070(6) 0.0494(15) Uani 1 1 d . . . . .
H51 H 0.2197 0.5335 0.5892 0.059 Uiso 1 1 calc R . . . .
C52 C 0.2994(5) 0.5759(3) 0.5534(8) 0.062(2) Uani 1 1 d . . . . .
H52 H 0.2803 0.6067 0.4975 0.075 Uiso 1 1 calc R . . . .
C53 C 0.3618(5) 0.5752(3) 0.5803(7) 0.062(2) Uani 1 1 d . . . . .
H53 H 0.3863 0.6049 0.5425 0.075 Uiso 1 1 calc R . . . .
C54 C 0.3892(4) 0.5298(3) 0.6648(7) 0.0483(14) Uani 1 1 d . . . . .
H54 H 0.4325 0.5293 0.6869 0.058 Uiso 1 1 calc R . . . .
C55 C 0.3535(3) 0.4854(2) 0.7165(5) 0.0369(10) Uani 1 1 d . . . . .
H55 H 0.3729 0.4549 0.7732 0.044 Uiso 1 1 calc R . . . .
C91 C 0.48388(18) 0.44048(15) 1.0699(4) 0.0229(7) Uani 1 1 d . . . . .
C92 C 0.48417(18) 0.39162(15) 1.1634(4) 0.0205(6) Uani 1 1 d . . . . .
C93 C 0.4538(2) 0.39290(17) 1.2965(5) 0.0263(7) Uani 1 1 d . . . . .
H93 H 0.4536 0.3596 1.3585 0.032 Uiso 1 1 calc R . . . .
C94 C 0.4240(2) 0.4424(2) 1.3392(6) 0.0355(10) Uani 1 1 d . . . . .
H94 H 0.4036 0.4430 1.4302 0.043 Uiso 1 1 calc R . . . .
C95 C 0.4241(3) 0.4910(2) 1.2479(6) 0.0382(10) Uani 1 1 d . . . . .
H95 H 0.4046 0.5253 1.2779 0.046 Uiso 1 1 calc R . . . .
C96 C 0.4525(2) 0.48974(17) 1.1135(5) 0.0306(8) Uani 1 1 d . . . . .
H96 H 0.4506 0.5227 1.0499 0.037 Uiso 1 1 calc R . . . .
C18S C 0.3758(7) 0.7186(6) 0.3402(16) 0.0815(11) Uani 0.462(8) 1 d . . . A 1
H18S H 0.3840 0.7474 0.4151 0.098 Uiso 0.462(8) 1 calc R . . A 1
C13S C 0.3155(6) 0.7060(7) 0.2891(16) 0.0815(11) Uani 0.462(8) 1 d G . . A 1
H13S H 0.2824 0.7261 0.3291 0.098 Uiso 0.462(8) 1 calc R . . A 1
C14S C 0.3035(5) 0.6639(8) 0.1795(16) 0.0815(11) Uani 0.462(8) 1 d G . . A 1
H14S H 0.2623 0.6553 0.1446 0.098 Uiso 0.462(8) 1 calc R . . A 1
C15S C 0.3519(7) 0.6344(7) 0.1210(16) 0.0815(11) Uani 0.462(8) 1 d G . . A 1
H15S H 0.3437 0.6056 0.0461 0.098 Uiso 0.462(8) 1 calc R . . A 1
C16S C 0.4122(6) 0.6470(7) 0.1720(17) 0.0815(11) Uani 0.462(8) 1 d G . . A 1
H16S H 0.4453 0.6268 0.1320 0.098 Uiso 0.462(8) 1 calc R . . A 1
C17S C 0.4242(5) 0.6891(7) 0.2816(17) 0.0815(11) Uani 0.462(8) 1 d G . . A 1
H17S H 0.4654 0.6977 0.3165 0.098 Uiso 0.462(8) 1 calc R . . A 1
C27S C 0.4201(7) 0.7119(7) 0.3503(16) 0.0815(11) Uani 0.430(7) 1 d . . . B 2
H27S H 0.4306 0.7379 0.4308 0.098 Uiso 0.430(7) 1 calc R . . B 2
C28S C 0.4660(6) 0.6822(8) 0.2821(17) 0.0815(11) Uani 0.430(7) 1 d G . . B 2
H28S H 0.5079 0.6879 0.3161 0.098 Uiso 0.430(7) 1 calc R . . B 2
C29S C 0.4505(7) 0.6442(8) 0.1642(17) 0.0815(11) Uani 0.430(7) 1 d G . . B 2
H29S H 0.4819 0.6240 0.1176 0.098 Uiso 0.430(7) 1 calc R . . B 2
C30S C 0.3892(8) 0.6360(7) 0.1145(16) 0.0815(11) Uani 0.430(7) 1 d G . . B 2
H30S H 0.3786 0.6100 0.0339 0.098 Uiso 0.430(7) 1 calc R . . B 2
C31S C 0.3433(6) 0.6657(8) 0.1827(18) 0.0815(11) Uani 0.430(7) 1 d G . . B 2
H31S H 0.3013 0.6600 0.1487 0.098 Uiso 0.430(7) 1 calc R . . B 2
C26S C 0.3587(7) 0.7036(8) 0.3006(18) 0.0815(11) Uani 0.430(7) 1 d G . . B 2
C21S C 0.2258(5) 0.6469(5) 0.8275(14) 0.0815(11) Uani 0.570(7) 1 d . . . B 1
H21S H 0.2500 0.6178 0.8785 0.098 Uiso 0.570(7) 1 calc R . . B 1
C20S C 0.2527(4) 0.6986(6) 0.7897(14) 0.0815(11) Uani 0.570(7) 1 d G . . B 1
H20S H 0.2953 0.7050 0.8147 0.098 Uiso 0.570(7) 1 calc R . . B 1
C19S C 0.2173(5) 0.7411(5) 0.7151(14) 0.0815(11) Uani 0.570(7) 1 d G . . B 1
C24S C 0.1550(5) 0.7319(5) 0.6785(14) 0.0815(11) Uani 0.570(7) 1 d G . . B 1
H24S H 0.1308 0.7609 0.6276 0.098 Uiso 0.570(7) 1 calc R . . B 1
C23S C 0.1281(4) 0.6801(6) 0.7164(14) 0.0815(11) Uani 0.570(7) 1 d G . . B 1
H23S H 0.0855 0.6738 0.6913 0.098 Uiso 0.570(7) 1 calc R . . B 1
C22S C 0.1635(6) 0.6376(4) 0.7909(14) 0.0815(11) Uani 0.570(7) 1 d G . . B 1
H22S H 0.1451 0.6022 0.8168 0.098 Uiso 0.570(7) 1 calc R . . B 1
C25S C 0.2475(10) 0.8000(9) 0.696(2) 0.0815(11) Uani 0.570(7) 1 d . . . B 1
H25A H 0.2847 0.7953 0.6409 0.122 Uiso 0.570(7) 1 calc GR . . B 1
H25B H 0.2586 0.8169 0.7952 0.122 Uiso 0.570(7) 1 calc GR . . B 1
H25C H 0.2186 0.8255 0.6381 0.122 Uiso 0.570(7) 1 calc GR . . B 1
C8S C 0.2461(6) 0.6806(5) 0.7977(16) 0.0815(11) Uani 0.538(8) 1 d . . . A 2
H8S H 0.2560 0.6427 0.8324 0.098 Uiso 0.538(8) 1 calc R . . A 2
C9S C 0.2916(5) 0.7226(6) 0.8010(16) 0.0815(11) Uani 0.538(8) 1 d G . . A 2
H9S H 0.3324 0.7136 0.8380 0.098 Uiso 0.538(8) 1 calc R . . A 2
C10S C 0.2772(6) 0.7779(5) 0.7501(16) 0.0815(11) Uani 0.538(8) 1 d G . . A 2
H10S H 0.3083 0.8067 0.7524 0.098 Uiso 0.538(8) 1 calc R . . A 2
C11S C 0.2174(6) 0.7912(5) 0.6959(16) 0.0815(11) Uani 0.538(8) 1 d G . . A 2
H11S H 0.2076 0.8290 0.6611 0.098 Uiso 0.538(8) 1 calc R . . A 2
C12S C 0.1720(5) 0.7491(6) 0.6926(15) 0.0815(11) Uani 0.538(8) 1 d G . . A 2
H12S H 0.1311 0.7582 0.6555 0.098 Uiso 0.538(8) 1 calc R . . A 2
C7S C 0.1863(5) 0.6938(5) 0.7435(15) 0.0815(11) Uani 0.538(8) 1 d G . . A 2
H7S H 0.1553 0.6651 0.7412 0.098 Uiso 0.538(8) 1 calc R . . A 2
C32S C 0.3143(6) 0.7369(7) 0.3802(17) 0.047(3) Uani 0.430(7) 1 d . . . B 2
H32A H 0.3330 0.7485 0.4795 0.071 Uiso 0.430(7) 1 calc GR . . B 2
H32B H 0.2779 0.7133 0.3933 0.071 Uiso 0.430(7) 1 calc GR . . B 2
H32C H 0.3024 0.7713 0.3212 0.071 Uiso 0.430(7) 1 calc GR . . B 2
C3S C -0.0531(4) 0.3841(6) 0.958(3) 0.0815(11) Uani 0.3333 1 d D . . C -1
H3S H -0.0920 0.4021 0.9395 0.098 Uiso 0.3333 1 calc R . . C -1
C4S C -0.0469(6) 0.3253(6) 0.9341(16) 0.0815(11) Uani 0.3333 1 d DG . . C -1
H4S H -0.0817 0.3031 0.8990 0.098 Uiso 0.3333 1 calc R . . C -1
C5S C 0.0101(7) 0.2990(6) 0.9613(16) 0.0815(11) Uani 0.3333 1 d DG . . C -1
H5S H 0.0143 0.2588 0.9448 0.098 Uiso 0.3333 1 calc R . . C -1
C6S C 0.0610(5) 0.3315(6) 1.0125(19) 0.0815(11) Uani 0.3333 1 d DG . . C -1
H6S H 0.1000 0.3135 1.0311 0.098 Uiso 0.3333 1 calc R . . C -1
C1S C 0.0549(4) 0.3903(6) 1.037(3) 0.0815(11) Uani 0.3333 1 d DG . . C -1
H1S H 0.0896 0.4125 1.0716 0.098 Uiso 0.3333 1 calc R . . C -1
C2S C -0.0022(5) 0.4166(6) 1.009(4) 0.0815(11) Uani 0.3333 1 d DG . . C -1
H2S H -0.0064 0.4568 1.0258 0.098 Uiso 0.3333 1 calc R . . C -1

loop_
_atom_site_aniso_label
_atom_site_aniso_U_11
_atom_site_aniso_U_22
_atom_site_aniso_U_33
_atom_site_aniso_U_23
_atom_site_aniso_U_13
_atom_site_aniso_U_12
Br1 0.0381(3) 0.0303(3) 0.0288(3) 0.000 0.0095(2) 0.000
N1 0.0178(17) 0.0102(15) 0.0160(16) 0.000 0.0024(13) 0.000
C11 0.0158(12) 0.0124(14) 0.0221(14) 0.0016(10) 0.0046(10) 0.0011(9)
C13 0.0232(15) 0.0137(13) 0.0204(14) -0.0028(11) 0.0015(12) 0.0004(11)
C21 0.0145(13) 0.0127(12) 0.0181(14) 0.0011(10) 0.0022(11) -0.0019(10)
C22 0.0155(13) 0.0123(12) 0.0225(15) 0.0021(10) 0.0027(11) -0.0012(10)
C23 0.0150(14) 0.0193(14) 0.0243(16) 0.0056(12) -0.0002(12) -0.0002(11)
C24 0.0176(14) 0.0240(16) 0.0247(16) 0.0019(13) -0.0019(12) -0.0066(12)
C25 0.0201(15) 0.0193(14) 0.0204(15) -0.0004(12) 0.0020(12) -0.0089(12)
C26 0.0295(18) 0.0276(17) 0.0183(15) -0.0008(13) 0.0031(13) -0.0147(14)
C27 0.039(2) 0.0261(17) 0.0226(17) -0.0088(13) 0.0112(15) -0.0139(16)
C28 0.036(2) 0.0179(15) 0.0263(17) -0.0048(13) 0.0131(15) -0.0041(14)
C29 0.0253(16) 0.0149(14) 0.0215(15) -0.0007(11) 0.0074(13) -0.0012(12)
C30 0.0184(14) 0.0139(12) 0.0188(14) 0.0010(10) 0.0045(11) -0.0054(11)
C31 0.0159(14) 0.0272(16) 0.0274(17) 0.0069(13) 0.0002(12) 0.0027(12)
C32 0.0217(18) 0.043(2) 0.036(2) 0.0202(18) 0.0140(16) 0.0122(16)
C33 0.029(2) 0.049(3) 0.041(2) 0.020(2) 0.0153(18) 0.023(2)
C34 0.0237(17) 0.0334(19) 0.0278(18) 0.0084(15) 0.0055(14) 0.0156(15)
C35 0.0285(18) 0.0299(18) 0.0208(16) 0.0074(13) 0.0019(13) 0.0112(14)
C36 0.0203(15) 0.0251(16) 0.0203(15) 0.0022(12) -0.0002(12) 0.0066(13)
C37 0.035(2) 0.043(2) 0.0233(17) 0.0055(16) 0.0039(15) 0.0252(19)
C38 0.043(3) 0.046(3) 0.040(2) -0.001(2) -0.008(2) 0.030(2)
C39 0.046(3) 0.061(4) 0.074(5) 0.001(3) -0.011(3) 0.018(3)
C40 0.054(4) 0.068(5) 0.096(7) 0.007(4) -0.020(4) 0.011(4)
C41 0.077(6) 0.056(4) 0.097(7) -0.010(4) -0.045(5) 0.029(4)
C42 0.085(6) 0.063(4) 0.061(4) -0.012(3) -0.039(4) 0.041(4)
C43 0.060(4) 0.059(4) 0.037(3) -0.003(2) -0.013(3) 0.037(3)
C44 0.031(2) 0.055(3) 0.029(2) 0.0053(19) 0.0085(17) 0.029(2)
C45 0.041(3) 0.079(4) 0.031(2) -0.001(2) 0.0008(19) 0.046(3)
C46 0.046(3) 0.106(6) 0.035(3) -0.003(3) 0.005(2) 0.054(4)
C47 0.046(3) 0.112(6) 0.026(2) -0.006(3) 0.007(2) 0.048(4)
C48 0.042(3) 0.111(6) 0.023(2) -0.003(3) 0.0039(19) 0.046(4)
C49 0.035(2) 0.082(4) 0.028(2) 0.001(2) 0.0106(18) 0.035(3)
C50 0.052(3) 0.033(2) 0.0187(16) 0.0029(14) 0.0092(17) 0.025(2)
C51 0.073(4) 0.039(3) 0.037(2) 0.010(2) 0.008(2) 0.032(3)
C52 0.110(7) 0.036(3) 0.043(3) 0.015(2) 0.019(4) 0.035(4)
C53 0.124(7) 0.028(2) 0.038(3) 0.006(2) 0.029(4) 0.013(3)
C54 0.074(4) 0.037(2) 0.036(2) -0.001(2) 0.016(3) 0.007(3)
C55 0.053(3) 0.031(2) 0.0267(19) 0.0036(16) 0.0080(19) 0.0119(19)
C91 0.0292(18) 0.0129(13) 0.0274(17) -0.0014(12) 0.0074(14) 0.0025(12)
C92 0.0278(17) 0.0139(13) 0.0203(15) -0.0016(11) 0.0064(13) 0.0013(12)
C93 0.035(2) 0.0223(16) 0.0234(16) -0.0026(13) 0.0118(14) -0.0010(14)
C94 0.041(2) 0.034(2) 0.033(2) -0.0051(17) 0.0176(19) 0.0055(18)
C95 0.049(3) 0.0230(18) 0.045(3) -0.0076(17) 0.018(2) 0.0086(18)
C96 0.040(2) 0.0158(15) 0.037(2) -0.0028(14) 0.0106(17) 0.0061(14)
C18S 0.088(3) 0.092(3) 0.0663(19) 0.0052(18) 0.0206(19) 0.007(2)
C13S 0.088(3) 0.092(3) 0.0663(19) 0.0052(18) 0.0206(19) 0.007(2)
C14S 0.088(3) 0.092(3) 0.0663(19) 0.0052(18) 0.0206(19) 0.007(2)
C15S 0.088(3) 0.092(3) 0.0663(19) 0.0052(18) 0.0206(19) 0.007(2)
C16S 0.088(3) 0.092(3) 0.0663(19) 0.0052(18) 0.0206(19) 0.007(2)
C17S 0.088(3) 0.092(3) 0.0663(19) 0.0052(18) 0.0206(19) 0.007(2)
C27S 0.088(3) 0.092(3) 0.0663(19) 0.0052(18) 0.0206(19) 0.007(2)
C28S 0.088(3) 0.092(3) 0.0663(19) 0.0052(18) 0.0206(19) 0.007(2)
C29S 0.088(3) 0.092(3) 0.0663(19) 0.0052(18) 0.0206(19) 0.007(2)
C30S 0.088(3) 0.092(3) 0.0663(19) 0.0052(18) 0.0206(19) 0.007(2)
C31S 0.088(3) 0.092(3) 0.0663(19) 0.0052(18) 0.0206(19) 0.007(2)
C26S 0.088(3) 0.092(3) 0.0663(19) 0.0052(18) 0.0206(19) 0.007(2)
C21S 0.088(3) 0.092(3) 0.0663(19) 0.0052(18) 0.0206(19) 0.007(2)
C20S 0.088(3) 0.092(3) 0.0663(19) 0.0052(18) 0.0206(19) 0.007(2)
C19S 0.088(3) 0.092(3) 0.0663(19) 0.0052(18) 0.0206(19) 0.007(2)
C24S 0.088(3) 0.092(3) 0.0663(19) 0.0052(18) 0.0206(19) 0.007(2)
C23S 0.088(3) 0.092(3) 0.0663(19) 0.0052(18) 0.0206(19) 0.007(2)
C22S 0.088(3) 0.092(3) 0.0663(19) 0.0052(18) 0.0206(19) 0.007(2)
C25S 0.088(3) 0.092(3) 0.0663(19) 0.0052(18) 0.0206(19) 0.007(2)
C8S 0.088(3) 0.092(3) 0.0663(19) 0.0052(18) 0.0206(19) 0.007(2)
C9S 0.088(3) 0.092(3) 0.0663(19) 0.0052(18) 0.0206(19) 0.007(2)
C10S 0.088(3) 0.092(3) 0.0663(19) 0.0052(18) 0.0206(19) 0.007(2)
C11S 0.088(3) 0.092(3) 0.0663(19) 0.0052(18) 0.0206(19) 0.007(2)
C12S 0.088(3) 0.092(3) 0.0663(19) 0.0052(18) 0.0206(19) 0.007(2)
C7S 0.088(3) 0.092(3) 0.0663(19) 0.0052(18) 0.0206(19) 0.007(2)
C32S 0.029(5) 0.063(8) 0.050(7) 0.004(6) 0.003(5) -0.003(5)
C3S 0.088(3) 0.092(3) 0.0663(19) 0.0052(18) 0.0206(19) 0.007(2)
C4S 0.088(3) 0.092(3) 0.0663(19) 0.0052(18) 0.0206(19) 0.007(2)
C5S 0.088(3) 0.092(3) 0.0663(19) 0.0052(18) 0.0206(19) 0.007(2)
C6S 0.088(3) 0.092(3) 0.0663(19) 0.0052(18) 0.0206(19) 0.007(2)
C1S 0.088(3) 0.092(3) 0.0663(19) 0.0052(18) 0.0206(19) 0.007(2)
C2S 0.088(3) 0.092(3) 0.0663(19) 0.0052(18) 0.0206(19) 0.007(2)

_geom_special_details            
;
 All esds (except the esd in the dihedral angle between two l.s. planes)
 are estimated using the full covariance matrix.  The cell esds are taken
 into account individually in the estimation of esds in distances, angles
 and torsion angles; correlations between esds in cell parameters are only
 used when they are defined by crystal symmetry.  An approximate (isotropic)
 treatment of cell esds is used for estimating esds involving l.s. planes.
;
loop_
_geom_bond_atom_site_label_1
_geom_bond_atom_site_label_2
_geom_bond_distance
_geom_bond_site_symmetry_2
_geom_bond_publ_flag
N1 C11 1.532(4) 2_657 ?
N1 C11 1.532(4) . ?
N1 C13 1.521(4) 2_657 ?
N1 C13 1.521(4) . ?
C11 C22 1.503(5) . ?
C13 C92 1.494(5) . ?
C21 C21 1.498(6) 2_657 ?
C21 C22 1.395(4) . ?
C21 C30 1.423(5) . ?
C22 C23 1.427(5) . ?
C23 C24 1.379(5) . ?
C23 C31 1.489(5) . ?
C24 C25 1.412(5) . ?
C25 C26 1.419(5) . ?
C25 C30 1.423(5) . ?
C26 C27 1.362(7) . ?
C27 C28 1.410(7) . ?
C28 C29 1.372(5) . ?
C29 C30 1.423(5) . ?
C31 C32 1.395(6) . ?
C31 C36 1.401(5) . ?
C32 C33 1.389(6) . ?
C33 C34 1.398(6) . ?
C34 C35 1.399(6) . ?
C34 C37 1.539(6) . ?
C35 C36 1.383(5) . ?
C37 C38 1.549(8) . ?
C37 C44 1.546(7) . ?
C37 C50 1.538(8) . ?
C38 C39 1.383(11) . ?
C38 C43 1.390(9) . ?
C39 C40 1.418(12) . ?
C40 C41 1.379(17) . ?
C41 C42 1.332(16) . ?
C42 C43 1.387(11) . ?
C44 C45 1.394(6) . ?
C44 C49 1.401(8) . ?
C45 C46 1.395(8) . ?
C46 C47 1.358(9) . ?
C47 C48 1.383(7) . ?
C48 C49 1.378(7) . ?
C50 C51 1.408(6) . ?
C50 C55 1.381(8) . ?
C51 C52 1.397(12) . ?
C52 C53 1.365(14) . ?
C53 C54 1.400(9) . ?
C54 C55 1.389(9) . ?
C91 C91 1.469(7) 2_657 ?
C91 C92 1.405(5) . ?
C91 C96 1.403(5) . ?
C92 C93 1.396(5) . ?
C93 C94 1.387(6) . ?
C94 C95 1.390(7) . ?
C95 C96 1.383(7) . ?
C18S C13S 1.3900 . ?
C18S C17S 1.3900 . ?
C13S C14S 1.3900 . ?
C14S C15S 1.3900 . ?
C15S C16S 1.3900 . ?
C16S C17S 1.3900 . ?
C27S C28S 1.3900 . ?
C27S C26S 1.3900 . ?
C28S C29S 1.3900 . ?
C29S C30S 1.3900 . ?
C30S C31S 1.3900 . ?
C31S C26S 1.3900 . ?
C26S C32S 1.461(19) . ?
C21S C20S 1.3900 . ?
C21S C22S 1.3900 . ?
C20S C19S 1.3900 . ?
C19S C24S 1.3900 . ?
C19S C25S 1.53(2) . ?
C24S C23S 1.3900 . ?
C23S C22S 1.3900 . ?
C8S C9S 1.3900 . ?
C8S C7S 1.3900 . ?
C9S C10S 1.3900 . ?
C10S C11S 1.3900 . ?
C11S C12S 1.3900 . ?
C12S C7S 1.3900 . ?
C3S C4S 1.3900 . ?
C3S C2S 1.3900 . ?
C4S C5S 1.330(18) 2_557 ?
C4S C5S 1.3900 . ?
C5S C6S 1.3900 . ?
C6S C1S 1.3900 . ?
C1S C2S 1.3900 . ?

loop_
_geom_angle_atom_site_label_1
_geom_angle_atom_site_label_2
_geom_angle_atom_site_label_3
_geom_angle
_geom_angle_site_symmetry_1
_geom_angle_site_symmetry_3
_geom_angle_publ_flag
C11 N1 C11 109.4(3) 2_657 . ?
C13 N1 C11 109.41(19) . 2_657 ?
C13 N1 C11 109.41(19) 2_657 . ?
C13 N1 C11 109.03(19) 2_657 2_657 ?
C13 N1 C11 109.03(19) . . ?
C13 N1 C13 110.5(4) 2_657 . ?
C22 C11 N1 111.1(3) . . ?
C92 C13 N1 115.1(3) . . ?
C22 C21 C21 117.9(2) . 2_657 ?
C22 C21 C30 120.3(3) . . ?
C30 C21 C21 121.7(2) . 2_657 ?
C21 C22 C11 117.9(3) . . ?
C21 C22 C23 120.3(3) . . ?
C23 C22 C11 121.6(3) . . ?
C22 C23 C31 121.6(3) . . ?
C24 C23 C22 119.5(3) . . ?
C24 C23 C31 118.7(3) . . ?
C23 C24 C25 121.3(3) . . ?
C24 C25 C26 121.2(3) . . ?
C24 C25 C30 119.7(3) . . ?
C26 C25 C30 119.2(4) . . ?
C27 C26 C25 121.7(4) . . ?
C26 C27 C28 119.4(3) . . ?
C29 C28 C27 120.8(4) . . ?
C28 C29 C30 121.1(4) . . ?
C21 C30 C29 123.3(3) . . ?
C25 C30 C21 118.9(3) . . ?
C25 C30 C29 117.8(3) . . ?
C32 C31 C23 122.8(3) . . ?
C32 C31 C36 118.2(4) . . ?
C36 C31 C23 118.9(3) . . ?
C33 C32 C31 120.5(4) . . ?
C32 C33 C34 121.5(4) . . ?
C33 C34 C35 117.4(4) . . ?
C33 C34 C37 122.9(4) . . ?
C35 C34 C37 119.4(4) . . ?
C36 C35 C34 121.4(4) . . ?
C35 C36 C31 120.7(4) . . ?
C34 C37 C38 102.7(4) . . ?
C34 C37 C44 112.8(4) . . ?
C44 C37 C38 112.9(4) . . ?
C50 C37 C34 111.6(4) . . ?
C50 C37 C38 113.6(4) . . ?
C50 C37 C44 103.6(4) . . ?
C39 C38 C37 119.3(5) . . ?
C39 C38 C43 119.0(7) . . ?
C43 C38 C37 121.3(6) . . ?
C38 C39 C40 119.5(8) . . ?
C41 C40 C39 119.8(10) . . ?
C42 C41 C40 119.9(8) . . ?
C41 C42 C43 122.1(9) . . ?
C42 C43 C38 119.7(9) . . ?
C45 C44 C37 122.2(4) . . ?
C45 C44 C49 117.0(5) . . ?
C49 C44 C37 120.0(4) . . ?
C44 C45 C46 120.6(5) . . ?
C47 C46 C45 121.0(5) . . ?
C46 C47 C48 119.6(5) . . ?
C49 C48 C47 120.0(5) . . ?
C48 C49 C44 121.6(4) . . ?
C51 C50 C37 119.9(5) . . ?
C55 C50 C37 122.1(4) . . ?
C55 C50 C51 117.6(6) . . ?
C52 C51 C50 120.8(7) . . ?
C53 C52 C51 120.8(6) . . ?
C52 C53 C54 118.8(7) . . ?
C55 C54 C53 120.6(7) . . ?
C50 C55 C54 121.3(5) . . ?
C92 C91 C91 121.1(2) . 2_657 ?
C96 C91 C91 120.4(3) . 2_657 ?
C96 C91 C92 118.5(4) . . ?
C91 C92 C13 120.4(3) . . ?
C93 C92 C13 119.1(3) . . ?
C93 C92 C91 120.0(3) . . ?
C94 C93 C92 120.7(4) . . ?
C93 C94 C95 119.6(4) . . ?
C96 C95 C94 120.3(4) . . ?
C95 C96 C91 120.9(4) . . ?
C13S C18S C17S 120.0 . . ?
C18S C13S C14S 120.0 . . ?
C15S C14S C13S 120.0 . . ?
C16S C15S C14S 120.0 . . ?
C15S C16S C17S 120.0 . . ?
C16S C17S C18S 120.0 . . ?
C28S C27S C26S 120.0 . . ?
C27S C28S C29S 120.0 . . ?
C30S C29S C28S 120.0 . . ?
C29S C30S C31S 120.0 . . ?
C26S C31S C30S 120.0 . . ?
C27S C26S C32S 115.4(12) . . ?
C31S C26S C27S 120.0 . . ?
C31S C26S C32S 124.6(12) . . ?
C20S C21S C22S 120.0 . . ?
C21S C20S C19S 120.0 . . ?
C20S C19S C25S 117.3(11) . . ?
C24S C19S C20S 120.0 . . ?
C24S C19S C25S 122.2(11) . . ?
C19S C24S C23S 120.0 . . ?
C22S C23S C24S 120.0 . . ?
C23S C22S C21S 120.0 . . ?
C9S C8S C7S 120.0 . . ?
C10S C9S C8S 120.0 . . ?
C9S C10S C11S 120.0 . . ?
C12S C11S C10S 120.0 . . ?
C11S C12S C7S 120.0 . . ?
C12S C7S C8S 120.0 . . ?
C4S C3S C2S 120.0 . . ?
C3S C4S C5S 120.0 . . ?
C5S C4S C3S 113.8(5) 2_557 . ?
C5S C4S C5S 36.0(15) 2_557 . ?
C6S C5S C4S 120.0 . . ?
C5S C6S C1S 120.0 . . ?
C6S C1S C2S 120.0 . . ?
C1S C2S C3S 120.0 . . ?

loop_
_refln_index_h
_refln_index_k
_refln_index_l
_refln_F_squared_meas
_refln_F_squared_sigma
-2 0 0 0.02 0.01
-2 0 0 0.02 0.01
-2 0 0 0 0.01
4 0 0 281.35 8.61
4 0 0 282.97 8.64
-4 0 0 284.49 8.61
-4 0 0 278.44 8.76
4 0 0 280.23 8.62
-4 0 0 277.85 8.61
-4 0 0 287.18 8.65
6 0 0 68.47 2.09
6 0 0 71.68 2.1
-6 0 0 67.73 2.18
-6 0 0 67.38 2.09
6 0 0 68.2 2.1
-6 0 0 68.43 2.1
-6 0 0 67.36 2.1
8 0 0 22.38 0.71
8 0 0 22.69 0.71
-8 0 0 21.73 0.82
8 0 0 22.36 0.7
-8 0 0 22.27 0.71
-8 0 0 21.38 0.72
-8 0 0 21.49 0.7
-10 0 0 12.05 0.43
10 0 0 12.42 0.41
10 0 0 12.07 0.43
-10 0 0 12.17 0.42
-10 0 0 11.68 0.43
-12 0 0 20.34 0.68
-12 0 0 19.75 0.67
-12 0 0 19.57 0.7
-12 0 0 20.46 0.68
12 0 0 20.37 0.68
-14 0 0 44.52 1.44
-14 0 0 43.23 1.41
14 0 0 45.02 1.42
-14 0 0 45.06 1.41
-16 0 0 6.3 0.33
-16 0 0 6.96 0.34
-18 0 0 3.36 0.24
-18 0 0 3.03 0.26
-20 0 0 6.95 0.41
-20 0 0 7.83 0.46
-22 0 0 7.32 0.47
-22 0 0 7.84 0.5
-24 0 0 1.17 0.28
-24 0 0 1.51 0.33
-26 0 0 4.36 0.38
-26 0 0 4.86 0.43
-28 0 0 1.15 0.39
-28 0 0 0.56 0.31
-30 0 0 0.56 0.39
-30 0 0 0.49 0.34
1 -1 0 0 0
-1 -1 0 0.02 0.01
-1 -1 0 0 0
-1 -1 0 0 0.01
-1 -1 0 0 0
1 -1 0 0 0
-1 -1 0 0 0.01
1 1 0 0.01 0.01
1 1 0 0 0.01
-1 1 0 0 0
1 1 0 0.01 0.01
1 1 0 0 0
-1 1 0 0 0
-3 -1 0 101.94 3.03
-3 -1 0 93.52 3.02
3 -1 0 103.04 3.02
-3 -1 0 96.21 3.02
-3 -1 0 98.19 3
3 -1 0 95.32 3
3 1 0 102.45 2.99
3 1 0 98.08 2.98
-3 1 0 97.01 2.99
3 1 0 96.31 3.02
-3 1 0 93.71 3.01
-3 1 0 97.49 2.98
-5 -1 0 300.09 9.12
-5 -1 0 300.1 9.16
5 -1 0 307.35 9.1
-5 -1 0 298.43 9.12
-5 -1 0 285.38 9.26
5 -1 0 296.06 9.09
5 1 0 323.23 9.65
5 1 0 307.8 9.66
5 1 0 325.91 9.62
-5 1 0 302.58 9.64
-5 1 0 306.15 9.6
-5 1 0 313.28 9.65
5 1 0 323.1 9.9
-7 -1 0 134.96 4.19
-7 -1 0 126.57 4.24
7 -1 0 141.88 4.16
7 -1 0 144.76 4.2
-7 -1 0 135.82 4.15
7 -1 0 135.08 4.19
-7 -1 0 134.56 4.21
-7 1 0 121.21 3.85
7 1 0 126.09 3.82
7 1 0 127.57 3.83
-7 1 0 125.99 3.89
-7 1 0 124.43 3.84
7 1 0 132.93 3.94
7 1 0 119.27 3.83
-9 -1 0 42.21 1.34
9 -1 0 43.89 1.35
9 -1 0 43.08 1.33
9 -1 0 42.5 1.34
-9 -1 0 43.95 1.34
-9 -1 0 41.65 1.35
9 1 0 48.92 1.55
9 1 0 49.83 1.54
-9 1 0 48.49 1.54
-9 1 0 51.09 1.73
-9 1 0 49.07 1.55
-9 1 0 50.47 1.54
-11 -1 0 45.55 1.44
-11 -1 0 45.07 1.43
-11 -1 0 45.86 1.43
-11 -1 0 45.9 1.46
-11 1 0 34.25 1.12
11 1 0 34.51 1.11
-11 1 0 35.16 1.11
11 1 0 35.85 1.1
-11 1 0 34.52 1.1
-13 -1 0 28.08 0.95
-13 -1 0 27.97 0.92
-13 -1 0 27.9 0.92
-13 -1 0 28.86 0.94
-13 1 0 31.33 1.03
-13 1 0 30.21 1
-13 1 0 31.14 1.02
-13 1 0 30.07 1.01
13 1 0 31.09 1.01
13 1 0 32.5 1
-15 -1 0 7.64 0.35
-15 -1 0 7.55 0.36
-15 1 0 7.29 0.36
15 1 0 7.27 0.34
-15 1 0 7.37 0.33
-15 1 0 7.34 0.36
-17 -1 0 16.95 0.62
-17 -1 0 16.2 0.62
-17 1 0 17.08 0.63
17 1 0 16.46 0.62
-17 1 0 16.37 0.6
-19 -1 0 12.88 0.55
-19 -1 0 12.79 0.57
-19 1 0 11.96 0.52
-19 1 0 12.08 0.54
-21 -1 0 3.36 0.29
-21 -1 0 3.24 0.31
-21 1 0 1.7 0.26
-21 1 0 1.63 0.24
-23 -1 0 3.14 0.32
-23 -1 0 2.81 0.32
-23 1 0 1.89 0.3
-23 1 0 1.73 0.27
-25 -1 0 3.12 0.35
-25 -1 0 4.03 0.39
-25 1 0 2.86 0.32
-25 1 0 2.69 0.36
-27 -1 0 2.85 0.37
-27 -1 0 3.04 0.41
-27 1 0 4.21 0.38
-27 1 0 3.99 0.43
-29 -1 0 1.93 0.36
-29 -1 0 1.79 0.4
-29 1 0 1.99 0.35
-29 1 0 1.51 0.4
0 -2 0 0 0
0 2 0 0.02 0.01
-2 -2 0 220.03 6.53
2 -2 0 204.24 6.41
2 -2 0 209.39 6.42
-2 -2 0 205.61 6.44
-2 -2 0 194.31 6.42
-2 -2 0 214.26 6.42
-2 -2 0 222.42 6.46
-2 2 0 199.54 6.18
-2 2 0 203.13 6.18
2 2 0 208.93 6.18
2 2 0 195.4 6.18
2 2 0 206.01 6.33
2 2 0 199.68 6.2
-4 -2 0 137.32 4.21
-4 -2 0 135.8 4.23
4 -2 0 141.7 4.22
-4 -2 0 138.5 4.26
-4 -2 0 136.76 4.2
-4 -2 0 131.89 4.22
4 2 0 146.46 4.93
4 2 0 156.51 4.82
-4 2 0 161.93 4.86
4 2 0 162.27 4.81
4 2 0 157.83 4.87
-4 2 0 156.15 4.79
-4 2 0 157.73 4.8
-6 -2 0 143.35 4.54
-6 -2 0 141.83 4.46
-6 -2 0 152.53 4.53
6 -2 0 145.23 4.46
-6 -2 0 144.16 4.49
-6 -2 0 151.01 4.47
6 2 0 137.67 4.6
-6 2 0 151.25 4.54
6 2 0 151.62 4.6
-6 2 0 146.04 4.58
6 2 0 152.56 4.53
-6 2 0 144.47 4.59
6 2 0 154.26 4.56
-8 -2 0 41.49 1.33
-8 -2 0 43.65 1.31
-8 -2 0 42.14 1.32
-8 -2 0 42.69 1.31
-8 -2 0 39.56 1.42
8 -2 0 42.42 1.32
-8 2 0 31.69 1.02
8 2 0 33.63 1.03
8 2 0 33.44 1.17
8 2 0 32.66 1.04
8 2 0 33.13 1.03
-8 2 0 32.01 1.03
-8 2 0 32.72 1.03
-10 -2 0 8.68 0.38
-10 -2 0 9.63 0.37
-10 -2 0 9.51 0.35
-10 -2 0 9.55 0.35
10 2 0 6.94 0.27
-10 2 0 6.63 0.26
-10 2 0 6.35 0.27
10 2 0 6.78 0.3
-10 2 0 6.8 0.28
10 2 0 7.19 0.5
-12 -2 0 4.3 0.25
-12 -2 0 3.97 0.23
-12 -2 0 4.2 0.25
-12 -2 0 4.04 0.25
-12 2 0 5.58 0.28
-12 2 0 5.12 0.25
-12 2 0 5.54 0.26
12 2 0 5.56 0.28
12 2 0 6.01 0.35
-14 -2 0 4.92 0.27
-14 -2 0 4.54 0.27
14 2 0 6.75 0.34
-14 2 0 6.89 0.34
-14 2 0 6.88 0.34
-14 2 0 7.01 0.3
-16 -2 0 11.52 0.47
-16 -2 0 10.78 0.46
16 2 0 10.47 0.44
-16 2 0 9.94 0.41
-16 2 0 9.88 0.42
-16 2 0 9.27 0.43
-18 -2 0 5.41 0.35
-18 -2 0 4.97 0.35
-18 2 0 4.73 0.35
-18 2 0 4.55 0.32
18 2 0 4.01 0.33
-20 -2 0 3.36 0.29
-20 -2 0 4.23 0.32
20 2 0 4.54 0.36
-20 2 0 4.16 0.33
-20 2 0 4.48 0.36
-22 -2 0 0.58 0.28
-22 -2 0 0.2 0.25
-22 2 0 1.09 0.29
-22 2 0 0.51 0.22
-24 -2 0 7.45 0.54
-24 -2 0 8.48 0.56
-24 2 0 5.88 0.46
-24 2 0 5.46 0.45
-26 -2 0 6.54 0.52
-26 -2 0 6.22 0.45
-26 2 0 5.64 0.44
-26 2 0 4.89 0.39
-28 -2 0 0.59 0.33
-28 -2 0 0.54 0.36
-28 2 0 0.13 0.29
-28 2 0 -0.01 0.36
-30 -2 0 2.79 0.41
-30 -2 0 3.31 0.45
-30 2 0 2.56 0.4
-1 -3 0 49.4 1.31
-1 -3 0 44.84 1.3
-1 -3 0 41.62 1.3
1 -3 0 39.49 1.31
1 -3 0 38.68 1.3
-1 -3 0 45.23 1.32
-1 -3 0 43.4 1.31
1 -3 0 38.54 1.3
1 3 0 34.4 1
-1 3 0 30.6 1
1 3 0 36.08 1
-1 3 0 32.23 1
-1 3 0 31.35 1
1 3 0 31.58 1
-1 3 0 30.18 1
-1 3 0 29.39 1.01
1 3 0 36.03 1.02
1 3 0 35 1.01
3 -3 0 251.64 7.62
-3 -3 0 247.69 7.63
3 -3 0 245.9 7.61
-3 -3 0 252.29 7.65
-3 -3 0 242.43 7.62
-3 -3 0 241.83 7.64
-3 -3 0 261.16 7.79
3 3 0 241.17 7.43
3 3 0 247.62 7.66
-3 3 0 244.62 7.44
3 3 0 242.81 7.49
-3 3 0 242.22 7.44
-3 3 0 235.88 7.44
3 3 0 247.42 7.45
-5 -3 0 570.21 17.24
5 -3 0 554.95 17.23
-5 -3 0 561.59 17.26
-5 -3 0 553.16 17.21
-5 -3 0 581.45 17.3
-5 -3 0 564.92 17.56
-5 3 0 621.96 18.37
5 3 0 599.77 18.46
5 3 0 621.78 18.38
5 3 0 615.97 18.38
-5 3 0 615.83 18.39
5 3 0 531.8 18.74
-5 3 0 609.02 18.36
-7 -3 0 104.77 3.12
-7 -3 0 100.3 3.21
-7 -3 0 102.92 3.11
7 -3 0 102.98 3.11
-7 -3 0 98.68 3.12
-7 -3 0 100.06 3.14
7 3 0 111.39 3.22
-7 3 0 105.1 3.22
7 3 0 106.27 3.23
-7 3 0 110.03 3.21
-7 3 0 105.22 3.22
-7 3 0 103.21 3.22
7 3 0 92.85 3.32
7 3 0 106.88 3.22
-9 -3 0 10.13 0.37
9 -3 0 9.6 0.36
-9 -3 0 9.4 0.39
-9 -3 0 9.27 0.36
-9 -3 0 9.89 0.35
-9 3 0 4.81 0.19
9 3 0 4.6 0.21
9 3 0 4.54 0.25
-9 3 0 5.18 0.23
-9 3 0 4.66 0.21
9 3 0 4.64 0.41
-11 -3 0 36.24 1.14
-11 -3 0 35.87 1.15
-11 -3 0 35.33 1.13
-11 -3 0 34.38 1.15
11 3 0 45.97 1.64
11 3 0 46.27 1.47
-11 3 0 45.36 1.45
-11 3 0 46.5 1.45
-11 3 0 45.93 1.43
-13 -3 0 2.09 0.18
-13 -3 0 2.45 0.19
13 3 0 4.8 0.49
-13 3 0 3.69 0.21
13 3 0 3.1 0.26
-13 3 0 3.88 0.23
-15 -3 0 30.27 0.98
-15 -3 0 28.86 0.98
-15 3 0 29.86 0.98
15 3 0 31.26 1.01
-15 3 0 27.69 1
-15 3 0 31.54 1
-17 -3 0 13.88 0.56
-17 -3 0 13.69 0.55
-17 3 0 15.35 0.56
17 3 0 14.67 0.59
-17 3 0 15.86 0.6
-17 3 0 15.03 0.59
-19 -3 0 15.12 0.64
-19 -3 0 15.91 0.63
19 3 0 17.12 0.67
-19 3 0 16.85 0.64
-19 3 0 17.91 0.68
-21 -3 0 15.34 0.65
-21 -3 0 13.98 0.63
-21 3 0 14.36 0.61
-21 3 0 14.74 0.6
21 3 0 14.29 0.61
-23 -3 0 2.5 0.31
-23 -3 0 2.79 0.32
-23 3 0 2.66 0.28
-23 3 0 3.08 0.34
-25 -3 0 6.9 0.56
-25 -3 0 6.42 0.45
-25 3 0 5.29 0.43
-25 3 0 6.12 0.48
-27 -3 0 1.54 0.34
-27 -3 0 1.7 0.34
-27 3 0 2.37 0.39
-27 3 0 1.99 0.31
-29 -3 0 1.02 0.36
-29 -3 0 0.46 0.37
-29 3 0 0.56 0.35
0 -4 0 447.74 13.67
0 -4 0 441.96 13.56
0 4 0 400.85 12.33
-2 -4 0 162.34 4.6
-2 -4 0 137.66 4.45
-2 -4 0 145.83 4.44
2 -4 0 130.6 4.45
2 -4 0 136.07 4.46
-2 -4 0 157.71 4.47
-2 -4 0 156.55 4.44
-2 -4 0 136.22 4.45
-2 4 0 141.62 4.64
2 4 0 159.77 4.66
2 4 0 146.26 4.65
2 4 0 168.28 4.79
-2 4 0 142.73 4.63
2 4 0 158.45 4.7
-2 4 0 146.33 4.67
-4 -4 0 125.83 3.75
-4 -4 0 135.07 3.77
-4 -4 0 114.7 3.7
-4 -4 0 125.6 3.74
-4 -4 0 121.18 3.75
4 -4 0 116 3.77
4 -4 0 112.55 3.74
4 4 0 131.55 3.82
-4 4 0 120.43 3.79
4 4 0 124.79 3.83
4 4 0 123.98 3.76
-4 4 0 119.76 3.81
4 4 0 125.35 3.82
-4 4 0 118.8 3.79
-6 -4 0 39.01 1.24
-6 -4 0 40.85 1.25
-6 -4 0 39.35 1.25
-6 -4 0 38.31 1.23
-6 -4 0 40.77 1.33
-6 4 0 47.91 1.45
6 4 0 49.48 1.47
-6 4 0 46.94 1.47
6 4 0 47.59 1.49
-6 4 0 48.16 1.46
6 4 0 41.57 1.56
-6 4 0 48.6 1.46
6 4 0 48.48 1.47
-8 -4 0 5.11 0.25
-8 -4 0 5.07 0.23
-8 -4 0 5.08 0.22
-8 -4 0 5.85 0.25
-8 -4 0 5.48 0.37
8 -4 0 5.17 0.23
8 4 0 3.96 0.18
8 4 0 3.96 0.23
-8 4 0 3.68 0.19
-8 4 0 3.94 0.17
8 4 0 4.01 0.19
-8 4 0 4.03 0.17
-8 4 0 3.94 0.16
8 4 0 3.77 0.37
-10 -4 0 18.59 0.63
-10 -4 0 17.81 0.66
-10 -4 0 18.81 0.63
-10 -4 0 19.33 0.65
-10 4 0 25.03 0.81
10 4 0 25.73 0.83
-10 4 0 24.25 0.8
10 4 0 23.21 1
-10 4 0 25.33 0.78
-12 -4 0 29.89 0.99
-12 -4 0 30.71 0.98
-12 -4 0 29.26 0.97
-12 4 0 29.58 0.98
12 4 0 29.72 1.19
12 4 0 30.15 0.99
-12 4 0 29.26 0.94
-12 4 0 29.32 0.96
-14 -4 0 40.63 1.3
-14 -4 0 40.33 1.31
-14 4 0 41.56 1.34
-14 4 0 40.65 1.32
14 4 0 42.15 1.36
14 4 0 43.61 1.62
-16 -4 0 47.96 1.55
-16 -4 0 49.18 1.56
-16 4 0 41.46 1.39
-16 4 0 44.03 1.39
-16 4 0 42.61 1.37
16 4 0 44.22 1.41
-18 -4 0 58.38 1.91
-18 -4 0 60.79 1.91
-18 4 0 60.15 1.88
-18 4 0 59.98 1.9
-18 4 0 58.51 1.94
18 4 0 59.37 1.91
-20 -4 0 22.06 0.81
-20 -4 0 22.08 0.83
-20 4 0 22.62 0.85
-20 4 0 24.54 0.84
20 4 0 24.38 0.87
-22 -4 0 3.5 0.34
-22 -4 0 2.83 0.32
-22 4 0 5.09 0.38
22 4 0 5.08 0.4
-22 4 0 4.79 0.4
-24 -4 0 3.11 0.35
-24 -4 0 2.46 0.34
-24 4 0 2.42 0.27
-24 4 0 2.43 0.34
-26 -4 0 7.4 0.58
-26 -4 0 6.59 0.55
-26 4 0 7.34 0.58
-26 4 0 7.39 0.51
-28 -4 0 0.37 0.36
-28 -4 0 0.88 0.36
-28 4 0 0.36 0.33
-30 -4 0 0.96 0.4
-30 -4 0 1 0.37
-30 4 0 1.3 0.41
1 -5 0 570.24 17.58
-1 -5 0 577.98 17.58
-1 -5 0 567.62 17.4
-1 5 0 568.57 17.81
1 5 0 580.44 17.73
-1 5 0 590.16 17.67
-3 -5 0 367.56 10.73
-3 -5 0 329.51 10.68
-3 -5 0 353.75 10.72
-3 -5 0 341.33 10.72
3 -5 0 343.39 10.7
3 -5 0 328.75 10.68
-3 -5 0 372.66 10.8
-3 -5 0 361.43 10.7
-3 5 0 304.42 9.86
3 5 0 323.73 9.86
-3 5 0 304.12 9.85
3 5 0 321.21 9.95
3 5 0 348.96 9.9
3 5 0 334.05 10.07
3 5 0 320.1 9.86
-5 -5 0 8.61 0.3
5 -5 0 8.56 0.3
-5 -5 0 8.48 0.33
-5 -5 0 9.08 0.39
-5 -5 0 9.19 0.32
5 -5 0 8.68 0.3
-5 -5 0 8.79 0.31
5 5 0 6.62 0.27
-5 5 0 6.13 0.19
-5 5 0 5.91 0.22
5 5 0 6.07 0.22
-5 5 0 6.13 0.23
5 5 0 5.8 0.35
5 5 0 5.97 0.23
-5 5 0 6.05 0.21
-7 -5 0 22.55 0.76
-7 -5 0 24.49 0.78
-7 -5 0 24.78 0.87
-7 -5 0 22.83 0.75
-7 -5 0 24.09 0.78
-7 5 0 19.07 0.58
7 5 0 15.98 0.76
-7 5 0 18.47 0.6
-7 5 0 18.25 0.59
7 5 0 19.12 0.64
7 5 0 19.01 0.6
7 5 0 19.38 0.6
-9 -5 0 1.07 0.16
-9 -5 0 1.32 0.14
-9 -5 0 1.25 0.13
-9 5 0 3.21 0.2
-9 5 0 3.91 0.16
9 5 0 3 0.36
9 5 0 4.05 0.26
-11 -5 0 46.04 1.46
-11 -5 0 46.5 1.45
-11 -5 0 45.85 1.47
-11 5 0 45.26 1.38
-11 5 0 44.46 1.38
11 5 0 40.79 1.58
11 5 0 44.23 1.41
-11 5 0 43.24 1.35
-13 -5 0 84.4 2.64
-13 -5 0 86.11 2.65
-13 5 0 89.49 2.71
13 5 0 88.1 2.74
-13 5 0 87.9 2.68
13 5 0 83.25 2.93
-15 -5 0 47.73 1.53
-15 -5 0 47.15 1.52
15 5 0 43.84 1.42
15 5 0 44.57 1.69
-15 5 0 41.78 1.38
-15 5 0 43.19 1.36
-17 -5 0 36.69 1.22
-17 -5 0 36.86 1.23
-17 5 0 28.07 0.98
-17 5 0 30.14 0.99
17 5 0 29.8 1.01
-17 5 0 28.18 0.95
-19 -5 0 48.79 1.6
-19 -5 0 49.88 1.62
19 5 0 48.52 1.6
-19 5 0 47.51 1.58
-19 5 0 49.84 1.56
-21 -5 0 37.46 1.26
-21 -5 0 35.24 1.25
-21 5 0 42.22 1.33
-21 5 0 39.56 1.36
21 5 0 39.21 1.36
-23 -5 0 3.07 0.35
-23 -5 0 2.9 0.34
-23 5 0 2.38 0.31
23 5 0 2.74 0.3
-23 5 0 2.19 0.25
-25 -5 0 5.33 0.44
-25 -5 0 5.24 0.43
-25 5 0 6.21 0.47
25 5 0 4.77 0.45
-25 5 0 5.54 0.44
-27 -5 0 1.65 0.36
-27 -5 0 1.99 0.37
-27 5 0 2.92 0.38
-29 -5 0 0.99 0.39
-29 -5 0 1.52 0.38
-29 5 0 0.79 0.39
0 -6 0 105.41 3.21
0 -6 0 100.49 3.19
0 -6 0 106.61 3.21
0 -6 0 103.78 3.2
0 -6 0 103.89 3.2
0 -6 0 105.22 3.2
0 6 0 83.7 2.55
0 6 0 82.78 2.55
0 6 0 82.56 2.56
0 6 0 85.41 2.58
0 6 0 81.55 2.55
0 6 0 84.13 2.57
-2 -6 0 111.22 3.32
-2 -6 0 106.57 3.34
-2 -6 0 103.03 3.3
2 -6 0 108.58 3.3
-2 -6 0 109.41 3.3
-2 -6 0 110.06 3.29
2 -6 0 107.4 3.31
-2 -6 0 107.02 3.31
2 -6 0 106.48 3.3
-2 6 0 89.17 2.83
-2 6 0 93.25 2.81
2 6 0 93.42 2.85
-2 6 0 89.96 2.83
2 6 0 92.72 2.8
2 6 0 92.03 2.84
2 6 0 92.43 2.82
-2 6 0 94.14 2.81
-2 6 0 93.03 2.81
-2 6 0 90.76 2.82
2 6 0 90.39 2.82
-4 -6 0 48.62 1.47
4 -6 0 44.68 1.41
-4 -6 0 45.64 1.4
-4 -6 0 45.12 1.41
4 -6 0 45.52 1.4
-4 -6 0 44.65 1.42
-4 -6 0 46.4 1.42
-4 -6 0 43.49 1.41
-4 6 0 58.28 1.75
4 6 0 57.66 1.78
4 6 0 57.29 1.76
-4 6 0 58.37 1.76
-4 6 0 55.65 1.76
4 6 0 56.05 1.83
4 6 0 57.65 1.76
-6 -6 0 87.04 2.8
6 -6 0 92.2 2.8
6 -6 0 92.5 2.8
-6 -6 0 89.17 2.82
-6 -6 0 89.5 2.8
-6 -6 0 94.03 2.81
-6 -6 0 95.24 2.89
-6 6 0 86.97 2.62
-6 6 0 84.98 2.63
-6 6 0 87.8 2.63
-6 6 0 86.85 2.63
6 6 0 88.78 2.64
6 6 0 83.17 2.65
6 6 0 77.93 2.73
6 6 0 90.36 2.63
-8 -6 0 17.86 0.61
-8 -6 0 19.8 0.64
-8 -6 0 17.96 0.62
-8 6 0 19.91 0.62
8 6 0 18.45 0.83
8 6 0 21.03 0.69
-8 6 0 19.79 0.65
-10 -6 0 85.33 2.63
-10 -6 0 85.41 2.64
-10 -6 0 84.15 2.62
10 6 0 67.83 2.41
10 6 0 72.33 2.26
-10 6 0 74.64 2.2
-10 6 0 72.28 2.23
-12 -6 0 32.89 1.07
-12 -6 0 32.32 1.05
-12 6 0 34.55 1.08
12 6 0 32.03 1.34
12 6 0 35.67 1.15
-12 6 0 35.72 1.12
-14 -6 0 20.14 0.7
-14 -6 0 20.14 0.72
-14 6 0 17.87 0.6
-14 6 0 18.72 0.64
14 6 0 18.38 0.68
14 6 0 15.9 0.92
-16 -6 0 29.2 0.99
-16 -6 0 28.69 0.98
-16 6 0 22.49 0.79
16 6 0 22.43 0.83
16 6 0 22.33 1.14
-16 6 0 23.71 0.76
-16 6 0 22.49 0.78
-18 -6 0 16.47 0.65
-18 -6 0 15.29 0.62
-18 6 0 11.7 0.46
18 6 0 11.4 0.54
-18 6 0 11.42 0.51
18 6 0 12.45 0.94
-20 -6 0 36.31 1.23
-20 -6 0 36.64 1.26
-20 6 0 36.19 1.2
20 6 0 36.63 1.25
-20 6 0 36.37 1.24
-22 -6 0 3.21 0.34
-22 -6 0 4.41 0.36
-22 6 0 3.63 0.27
22 6 0 3.39 0.33
-22 6 0 4.26 0.34
-24 -6 0 2.52 0.35
-24 -6 0 1.9 0.33
24 6 0 2.01 0.3
-24 6 0 2.22 0.26
-24 6 0 3.04 0.34
-26 -6 0 7.25 0.6
-26 -6 0 7.28 0.59
-26 6 0 8.62 0.6
-28 -6 0 2.06 0.4
-28 -6 0 1.71 0.39
-28 6 0 0.92 0.37
-30 -6 0 0.39 0.4
-30 -6 0 0.34 0.38
-30 6 0 0.61 0.4
-1 -7 0 7.38 0.25
-1 -7 0 7.27 0.29
-1 -7 0 7.44 0.25
1 -7 0 6.93 0.24
-1 -7 0 7.63 0.25
1 -7 0 6.63 0.23
1 -7 0 6.95 0.24
1 -7 0 7.55 0.23
1 -7 0 7.56 0.26
-1 -7 0 7.07 0.24
-1 -7 0 7.01 0.24
-1 7 0 10 0.32
1 7 0 10.25 0.34
-1 7 0 9.31 0.31
-1 7 0 10.1 0.32
1 7 0 10.2 0.33
-1 7 0 9.31 0.32
1 7 0 9.99 0.38
1 7 0 9.8 0.33
1 7 0 10.23 0.36
1 7 0 10.28 0.32
-1 7 0 9.29 0.37
-3 -7 0 229.03 7.16
3 -7 0 219.87 7.16
3 -7 0 233.32 7.19
-3 -7 0 242.15 7.2
-3 -7 0 234.92 7.16
-3 -7 0 236.9 7.22
-3 -7 0 223.93 7.13
-3 -7 0 247.98 7.27
3 7 0 227.85 6.77
-3 7 0 218.78 6.7
3 7 0 222.29 6.85
-3 7 0 211.55 6.7
-3 7 0 226.34 6.78
3 7 0 219.61 6.83
3 7 0 224.84 6.77
3 7 0 229.61 6.93
-3 7 0 216.64 6.73
-3 7 0 207.57 6.71
5 -7 0 18.08 0.63
5 -7 0 19.35 0.63
-5 -7 0 19.46 0.63
-5 -7 0 19.69 0.66
-5 -7 0 19.89 0.65
-5 -7 0 21.69 0.72
-5 -7 0 19.12 0.64
-5 -7 0 20.57 0.65
5 7 0 15.53 0.49
5 7 0 15.63 0.61
-5 7 0 14.13 0.48
-5 7 0 14.54 0.48
5 7 0 14.52 0.52
-5 7 0 14.26 0.46
5 7 0 14.95 0.48
-7 -7 0 24.57 0.8
-7 -7 0 24.37 0.78
7 -7 0 24.02 0.78
-7 -7 0 24.64 0.8
-7 7 0 31.62 0.98
-7 7 0 33.28 0.94
7 7 0 29.64 1.13
-7 7 0 26.97 0.98
7 7 0 32.44 1.02
-9 -7 0 28.34 0.95
-9 -7 0 28.49 0.92
-9 -7 0 27.76 0.9
-9 7 0 19.2 0.62
-9 7 0 19.36 0.58
9 7 0 15.52 0.81
9 7 0 18.53 0.67
-11 -7 0 18.21 0.62
-11 -7 0 18.47 0.64
11 7 0 18.12 0.93
11 7 0 21.05 0.75
-11 7 0 22.26 0.71
-11 7 0 21.5 0.67
-13 -7 0 6.58 0.35
-13 -7 0 6.7 0.33
13 7 0 5.86 0.63
-13 7 0 8.3 0.35
13 7 0 7.79 0.41
-13 7 0 8.15 0.29
-15 -7 0 0.38 0.17
-15 -7 0 0.23 0.16
15 7 0 0.17 0.4
-15 7 0 0.79 0.12
15 7 0 0.24 0.22
-15 7 0 0.57 0.16
-17 -7 0 20.33 0.74
-17 -7 0 19.53 0.76
17 7 0 14.62 1.06
-17 7 0 16.4 0.6
-17 7 0 13.53 0.56
-17 7 0 14.89 0.54
17 7 0 15.26 0.64
-19 -7 0 16.81 0.66
-19 -7 0 17.51 0.71
-19 7 0 16.11 0.67
19 7 0 17.81 1.13
19 7 0 16.1 0.69
-19 7 0 17.61 0.62
-21 -7 0 4.74 0.37
-21 -7 0 5.81 0.45
21 7 0 5.06 0.42
-21 7 0 5.79 0.35
-21 7 0 5.29 0.42
-23 -7 0 3.01 0.33
-23 -7 0 3.81 0.37
-23 7 0 3.99 0.29
23 7 0 3.8 0.35
-23 7 0 3.38 0.34
-25 -7 0 7.65 0.63
-25 -7 0 8.38 0.59
25 7 0 7.87 0.52
-25 7 0 7.61 0.56
-27 -7 0 1.71 0.39
-27 -7 0 1.96 0.39
-27 7 0 0.85 0.36
-29 -7 0 1.16 0.41
-29 -7 0 1.32 0.39
-29 7 0 0.38 0.37
0 -8 0 216.73 6.68
0 -8 0 221.18 6.8
0 -8 0 218.02 6.7
0 -8 0 218.61 6.69
0 -8 0 217.3 6.69
0 -8 0 220.49 6.69
0 8 0 225.62 6.93
0 8 0 226.98 7.03
0 8 0 229.64 6.93
0 8 0 231.76 6.95
0 8 0 227.02 7.12
0 8 0 222.82 6.92
0 8 0 218.45 6.92
2 -8 0 69.73 2.09
-2 -8 0 68.93 2.09
2 -8 0 66.3 2.08
-2 -8 0 67.31 2.09
-2 -8 0 70.47 2.14
-2 -8 0 67.41 2.09
-2 -8 0 69.43 2.1
2 -8 0 65.64 2.1
-2 -8 0 69.31 2.09
-2 8 0 70.65 2.26
2 8 0 70.13 2.24
-2 8 0 73.1 2.21
2 8 0 73.66 2.27
2 8 0 72.54 2.21
-2 8 0 73.82 2.21
2 8 0 75.88 2.22
-2 8 0 69.53 2.22
-2 8 0 70.5 2.22
2 8 0 72.23 2.23
-2 8 0 74.23 2.2
-4 -8 0 0.85 0.15
-4 -8 0 1.09 0.1
-4 -8 0 1.02 0.11
-4 -8 0 1 0.11
-4 8 0 0.69 0.06
-4 8 0 0.83 0.04
4 8 0 1.35 0.13
-4 8 0 0.88 0.09
-4 8 0 0.71 0.07
-4 8 0 0.65 0.04
4 8 0 0.86 0.09
4 8 0 0.63 0.06
4 8 0 1.58 0.2
6 -8 0 87.32 2.7
6 -8 0 86.78 2.7
-6 -8 0 90.67 2.72
-6 -8 0 91.28 2.72
-6 -8 0 83.46 2.71
-6 -8 0 88.84 2.7
-6 8 0 105.96 3.1
6 8 0 98.17 3.12
6 8 0 103.79 3.09
6 8 0 96.98 3.2
-6 8 0 99.59 3.08
8 -8 0 29.53 0.93
-8 -8 0 29.33 0.94
-8 -8 0 28.12 0.93
8 8 0 32.41 1.06
-8 8 0 32.5 0.97
-8 8 0 32.01 1.01
8 8 0 29.23 1.17
-10 -8 0 2.88 0.21
-10 -8 0 2.76 0.21
-10 8 0 1.55 0.1
10 8 0 1.86 0.36
-10 8 0 1.66 0.15
-12 -8 0 3.2 0.23
-12 -8 0 3.08 0.24
12 8 0 2.83 0.26
-12 8 0 2.58 0.15
12 8 0 2.02 0.43
-12 8 0 2.59 0.22
-14 -8 0 5.08 0.33
-14 8 0 4.2 0.27
14 8 0 2.44 0.49
14 8 0 3.87 0.31
-14 8 0 3.86 0.2
-16 -8 0 2.41 0.25
-16 -8 0 2.88 0.25
16 8 0 2.74 0.55
16 8 0 2.91 0.32
-16 8 0 4.03 0.31
-16 8 0 3.65 0.23
-16 8 0 3.35 0.28
-18 -8 0 25.12 0.88
-18 -8 0 23.63 0.89
-18 8 0 20.23 0.74
18 8 0 20.29 0.8
18 8 0 19.13 1.16
-18 8 0 20.84 0.7
-20 -8 0 13.59 0.63
-20 -8 0 13.45 0.62
-20 8 0 15.38 0.62
-20 8 0 15.82 0.58
20 8 0 15.66 1.13
20 8 0 15.34 0.7
-22 -8 0 14.63 0.71
-22 -8 0 15.6 0.69
22 8 0 12.85 0.63
-22 8 0 13.44 0.61
-22 8 0 12.43 0.54
-24 -8 0 6.36 0.49
-24 -8 0 4.93 0.43
-24 8 0 5.75 0.45
24 8 0 6.04 0.5
-26 -8 0 0.55 0.34
-26 -8 0 0.9 0.36
-26 8 0 0.04 0.32
-28 -8 0 2.11 0.43
-28 -8 0 2.57 0.41
-28 8 0 1.91 0.39
1 -9 0 133.95 4.12
1 -9 0 132.82 4.16
-1 -9 0 130.88 4.11
-1 -9 0 133.12 4.11
-1 -9 0 138.89 4.12
1 -9 0 137.72 4.12
1 -9 0 135.61 4.11
1 -9 0 136.62 4.16
-1 -9 0 132.39 4.15
-1 -9 0 137.61 4.17
1 -9 0 136.18 4.12
-1 9 0 125.99 3.85
1 9 0 127.43 3.85
-1 9 0 130.23 3.9
1 9 0 121.24 3.86
-1 9 0 124.83 3.85
1 9 0 132.44 3.87
-1 9 0 125.19 3.88
1 9 0 124.55 3.91
-1 9 0 127.55 3.88
-1 9 0 126.28 3.85
1 9 0 124.94 3.86
-3 -9 0 6.29 0.21
-3 -9 0 5.52 0.29
-3 -9 0 5.55 0.23
3 -9 0 6.02 0.24
3 -9 0 5.96 0.23
3 -9 0 5.86 0.2
-3 -9 0 5.74 0.23
-3 -9 0 5.75 0.24
-3 -9 0 5.86 0.23
3 9 0 9.63 0.37
3 9 0 9.51 0.32
-3 9 0 9.43 0.4
3 9 0 9.43 0.33
3 9 0 9.59 0.42
-3 9 0 9.16 0.33
-3 9 0 9.27 0.3
-3 9 0 9.63 0.32
-3 9 0 9.46 0.31
-3 9 0 9.47 0.3
3 9 0 9.55 0.38
5 -9 0 403.93 12.38
5 -9 0 390.22 12.3
-5 -9 0 416.53 12.3
-5 -9 0 394.9 12.33
-5 -9 0 410.14 12.38
5 9 0 398.24 12.25
-5 9 0 382.88 11.9
5 9 0 391.58 12.14
-5 9 0 399.32 11.9
-5 9 0 390.21 11.93
5 9 0 390.6 11.97
-7 -9 0 0.53 0.11
-7 -9 0 0.65 0.13
7 -9 0 0.58 0.11
7 -9 0 0.65 0.11
-7 9 0 -0.01 0.09
-7 9 0 0.03 0.04
7 9 0 -0.01 0.17
7 9 0 -0.23 0.23
-7 9 0 0.05 0.03
-9 9 0 2.9 0.12
-11 -9 0 9.6 0.39
-11 -9 0 9.77 0.42
-11 9 0 5.14 0.26
11 9 0 4.03 0.49
11 9 0 4.93 0.36
-11 9 0 5.3 0.2
-13 -9 0 8.67 0.41
-13 -9 0 8.67 0.37
-13 9 0 6.3 0.31
-13 9 0 6.15 0.24
13 9 0 5.12 0.58
13 9 0 6.05 0.41
-15 -9 0 21.21 0.78
-15 -9 0 21.81 0.76
-15 9 0 22.67 0.78
15 9 0 21.13 1.13
-15 9 0 22.94 0.73
15 9 0 21.95 0.85
-17 -9 0 2.92 0.27
-17 -9 0 2.24 0.27
-17 9 0 4.18 0.25
17 9 0 3.47 0.66
17 9 0 3.65 0.35
-17 9 0 4.5 0.34
-19 -9 0 12.21 0.58
-19 -9 0 13.88 0.62
19 9 0 12.63 1.03
-19 9 0 14.63 0.52
-19 9 0 13.53 0.58
19 9 0 14.32 0.65
-21 -9 0 3.03 0.35
-21 -9 0 3.74 0.35
21 9 0 4.22 0.37
-21 9 0 3.84 0.31
-21 9 0 3.84 0.33
21 9 0 4.3 0.76
-23 -9 0 8.46 0.59
-23 -9 0 8.53 0.57
23 9 0 8.28 0.54
-23 9 0 7.11 0.51
-25 -9 0 0.89 0.36
-25 -9 0 2.02 0.35
25 9 0 1.7 0.34
-25 9 0 1.51 0.32
-27 -9 0 3.3 0.44
-27 -9 0 2.9 0.42
-27 9 0 2.6 0.39
-29 -9 0 0.44 0.42
-29 -9 0 0.8 0.39
-29 9 0 -0.54 0.36
0 -10 0 21.43 0.68
0 -10 0 21.77 0.68
0 -10 0 21.41 0.74
0 -10 0 22.09 0.67
0 -10 0 21.23 0.7
0 -10 0 21.2 0.67
0 10 0 28.78 0.92
0 10 0 29.88 0.91
0 10 0 29.86 0.91
0 10 0 29.61 0.91
0 10 0 28.72 0.98
0 10 0 27.79 0.94
0 10 0 28.94 0.91
-2 -10 0 15.19 0.51
-2 -10 0 13.15 0.54
2 -10 0 16.11 0.49
2 -10 0 16.67 0.52
-2 -10 0 15.31 0.51
-2 -10 0 15.46 0.5
-2 -10 0 16.1 0.5
2 -10 0 15.12 0.5
2 10 0 13.2 0.47
-2 10 0 12.76 0.41
2 10 0 13.14 0.43
-2 10 0 12.87 0.42
-2 10 0 12.82 0.5
2 10 0 12.94 0.52
-2 10 0 12.85 0.43
2 10 0 12.9 0.47
2 10 0 12.95 0.42
4 -10 0 138.57 4.31
-4 -10 0 149.57 4.32
-4 -10 0 138.87 4.31
-4 -10 0 138.96 4.32
4 -10 0 140.84 4.32
4 10 0 130.13 3.83
-4 10 0 120.11 3.83
4 10 0 125.41 3.87
-4 10 0 126.37 3.85
-4 10 0 122.43 3.89
4 10 0 130.65 3.93
-4 10 0 124.96 3.84
6 -10 0 2.41 0.16
-6 -10 0 2.16 0.16
-6 -10 0 2.28 0.17
6 -10 0 2.07 0.16
-6 10 0 5.59 0.18
-6 10 0 5.44 0.19
6 10 0 5.62 0.33
6 10 0 5.51 0.43
-8 -10 0 16.78 0.56
8 -10 0 16.41 0.56
-8 -10 0 16.34 0.57
8 -10 0 15.25 0.56
-8 10 0 18.56 0.58
8 10 0 17.24 0.82
-8 10 0 19.1 0.58
-8 10 0 18.59 0.63
8 10 0 19.57 0.7
-10 -10 0 21.99 0.78
10 -10 0 22.84 0.76
-10 -10 0 23.22 0.76
-10 10 0 19.49 0.65
10 10 0 19.08 0.71
-10 10 0 18.9 0.6
10 10 0 18.77 0.9
-12 -10 0 14.88 0.55
-12 -10 0 14.88 0.57
-12 10 0 11.72 0.46
12 10 0 10.54 0.76
12 10 0 12.31 0.56
-12 10 0 12.86 0.4
-14 -10 0 12.39 0.52
-14 -10 0 13.43 0.55
-14 10 0 15.22 0.49
14 10 0 14.17 0.64
-14 10 0 15.29 0.55
14 10 0 11.76 0.89
-16 -10 0 5.72 0.41
-16 -10 0 4.87 0.37
-16 10 0 2.24 0.2
16 10 0 1.89 0.54
-16 10 0 2.27 0.16
-16 10 0 2.57 0.23
16 10 0 2.42 0.32
-18 -10 0 17.04 0.69
-18 -10 0 16.65 0.71
-18 10 0 14.65 0.6
-18 10 0 15.5 0.53
18 10 0 14.03 0.68
18 10 0 13.65 1.04
-20 -10 0 1.2 0.28
-20 -10 0 1.96 0.31
20 10 0 2.8 0.35
-20 10 0 2.95 0.22
-20 10 0 2.19 0.26
20 10 0 2.23 0.65
-22 -10 0 10.14 0.63
-22 -10 0 10.44 0.6
22 10 0 12.62 1.16
22 10 0 10.44 0.62
-22 10 0 10.31 0.56
-24 -10 0 1.29 0.35
-24 -10 0 1.93 0.37
-24 10 0 2.2 0.33
24 10 0 1.79 0.34
-26 -10 0 1.49 0.36
-26 -10 0 1.1 0.37
-26 10 0 0.32 0.32
-28 -10 0 0.49 0.38
-28 -10 0 0.53 0.41
-28 10 0 -0.03 0.35
1 -11 0 23.07 0.74
1 -11 0 23.65 0.73
1 -11 0 22.99 0.76
-1 -11 0 23.35 0.74
-1 -11 0 22.7 0.73
-1 -11 0 23.36 0.73
-1 -11 0 23.87 0.77
1 -11 0 22.96 0.72
1 -11 0 22.91 0.72
1 11 0 24.37 0.86
-1 11 0 25.33 0.78
1 11 0 25.94 0.78
-1 11 0 25.28 0.78
-1 11 0 24.95 0.78
1 11 0 24.53 0.83
1 11 0 25.58 0.78
1 11 0 24.08 0.81
-1 11 0 23.83 0.78
-1 11 0 24.5 0.85
1 11 0 24 0.79
-1 11 0 23.7 0.79
-3 -11 0 123.63 3.74
-3 -11 0 120.47 3.75
-3 -11 0 122.49 3.75
3 -11 0 121.11 3.74
3 -11 0 124.2 3.74
3 -11 0 120.57 3.75
-3 -11 0 125.41 3.74
3 11 0 103.66 3.19
-3 11 0 102.41 3.16
-3 11 0 100.29 3.08
3 11 0 105.21 3.09
-3 11 0 100.34 3.09
3 11 0 97.14 3.13
3 11 0 99.74 3.13
-3 11 0 100.98 3.09
5 -11 0 26.27 0.85
5 -11 0 26.41 0.86
-5 -11 0 26.55 0.86
-5 -11 0 27.27 0.86
-5 -11 0 25.88 0.85
-5 11 0 34.24 1.05
-5 11 0 33.39 1.04
5 11 0 34.95 1.2
-5 11 0 34.22 1.04
-5 11 0 33.4 1.14
5 11 0 33.27 1.11
-7 -11 0 105.89 3.2
7 -11 0 104.09 3.2
-7 -11 0 102 3.21
7 -11 0 104.14 3.2
-7 11 0 106.02 3.18
7 11 0 105.65 3.25
7 11 0 100.21 3.35
-7 11 0 105.39 3.18
9 -11 0 65.78 2.02
-9 -11 0 64.74 2.02
-9 -11 0 64.07 2.03
9 11 0 52.3 1.99
-9 11 0 58.35 1.81
-9 11 0 60.11 1.77
9 11 0 59.3 1.87
-9 11 0 58.6 1.76
-11 -11 0 18.97 0.69
-11 -11 0 19.53 0.68
11 11 0 19.53 0.77
11 11 0 18.32 0.95
-11 11 0 19.96 0.67
-11 11 0 19.96 0.62
-13 -11 0 22.15 0.81
-13 -11 0 23.34 0.8
-13 11 0 16.88 0.53
13 11 0 14.56 0.93
-13 11 0 16.03 0.59
13 11 0 16.61 0.7
-15 -11 0 1.49 0.24
-15 -11 0 1.22 0.23
-15 11 0 2.44 0.17
15 11 0 1.14 0.51
15 11 0 1.31 0.3
-15 11 0 1.89 0.22
-17 -11 0 12.82 0.58
-17 -11 0 12.89 0.6
17 11 0 9.73 1
-17 11 0 10.47 0.48
-17 11 0 11.01 0.41
17 11 0 10.7 0.59
-19 -11 0 0.78 0.27
-19 -11 0 1.41 0.3
-19 11 0 0.75 0.23
19 11 0 0.59 0.32
-19 11 0 1.05 0.16
19 11 0 1.25 0.66
-21 -11 0 3.32 0.36
-21 -11 0 2.96 0.35
21 11 0 4.04 0.4
-21 11 0 3.41 0.32
21 11 0 3.21 0.76
-23 -11 0 2.55 0.37
-23 -11 0 2.19 0.38
-23 11 0 1.86 0.31
23 11 0 2.21 0.36
-25 -11 0 1.59 0.39
-25 -11 0 1.05 0.37
-25 11 0 0.51 0.3
25 11 0 0.57 0.37
-27 -11 0 0.44 0.37
-27 -11 0 0.07 0.37
-27 11 0 -0.17 0.34
0 -12 0 10.64 0.36
0 -12 0 9.97 0.34
0 -12 0 10.13 0.34
0 12 0 5.28 0.21
0 12 0 4.97 0.22
0 12 0 6.09 0.27
0 12 0 6.13 0.24
0 12 0 6.36 0.31
2 -12 0 18.26 0.62
2 -12 0 18.45 0.59
2 -12 0 18.63 0.6
-2 -12 0 18.39 0.6
-2 -12 0 18.43 0.6
-2 -12 0 18.63 0.6
-2 12 0 15.04 0.47
-2 12 0 14.05 0.47
2 12 0 14.67 0.47
2 12 0 14.02 0.59
2 12 0 14.31 0.55
-2 12 0 14.73 0.47
2 12 0 14.27 0.53
-2 12 0 13.79 0.56
-2 12 0 14.5 0.49
-4 -12 0 42.42 1.28
4 -12 0 42.07 1.3
-4 -12 0 40.92 1.3
-4 -12 0 40.16 1.3
-4 -12 0 41.55 1.3
4 -12 0 40.61 1.31
4 12 0 43.93 1.47
-4 12 0 42.89 1.42
-4 12 0 43.65 1.33
-4 12 0 42.51 1.34
4 12 0 42.56 1.39
-4 12 0 43.71 1.33
6 -12 0 126.64 3.84
-6 -12 0 127.73 3.84
-6 -12 0 120.46 3.84
6 -12 0 125.61 3.83
-6 12 0 111.56 3.4
-6 12 0 114.29 3.4
6 12 0 108.76 3.55
-6 12 0 108.82 3.49
6 12 0 113.32 3.46
8 -12 0 9.47 0.39
8 -12 0 9.57 0.39
-8 -12 0 10.33 0.41
-8 -12 0 10.57 0.4
-8 12 0 7.18 0.32
8 12 0 7.93 0.62
-8 12 0 7.88 0.25
8 12 0 8.11 0.41
-8 12 0 7.69 0.26
-10 -12 0 10.76 0.45
10 -12 0 10.27 0.43
-10 -12 0 11.15 0.44
10 12 0 11.16 0.73
-10 12 0 11.48 0.37
-10 12 0 11.11 0.44
-10 12 0 11.37 0.37
10 12 0 12.62 0.56
-12 -12 0 6.99 0.37
-12 -12 0 6.87 0.38
-12 12 0 10 0.41
12 12 0 9.3 0.53
12 12 0 8.22 0.74
-12 12 0 9.64 0.32
-14 -12 0 4.96 0.37
-14 -12 0 4.88 0.36
-14 12 0 3.41 0.28
-14 12 0 2.83 0.17
14 12 0 1.49 0.52
14 12 0 2.77 0.35
-16 -12 0 16.35 0.64
-16 -12 0 16.78 0.69
16 12 0 14.3 1.04
16 12 0 15.84 0.74
-16 12 0 17.55 0.56
-16 12 0 17.19 0.63
-18 -12 0 0.3 0.27
-18 -12 0 0.39 0.25
18 12 0 0.15 0.31
-18 12 0 0.46 0.16
-18 12 0 0.33 0.2
18 12 0 -0.48 0.6
-20 -12 0 4.49 0.4
-20 -12 0 4.26 0.35
20 12 0 3.35 0.4
-20 12 0 3.6 0.31
20 12 0 3.09 0.71
-22 -12 0 2.09 0.35
-22 -12 0 3.49 0.38
22 12 0 1.89 0.35
-22 12 0 1.64 0.29
22 12 0 1.69 0.72
-24 -12 0 0.96 0.37
-24 -12 0 1.03 0.35
24 12 0 1.09 0.33
-24 12 0 0.74 0.3
-26 -12 0 0.62 0.39
-26 -12 0 0.21 0.37
-26 12 0 -0.31 0.32
-28 -12 0 1.08 0.42
-28 -12 0 1.5 0.43
-28 12 0 0.28 0.34
-1 -13 0 43.04 1.39
1 -13 0 45.23 1.37
-1 -13 0 42.65 1.36
1 -13 0 44.02 1.34
-1 -13 0 44.02 1.37
-1 -13 0 44.03 1.36
1 -13 0 44.22 1.39
1 -13 0 44.16 1.34
1 13 0 42.42 1.37
-1 13 0 43.64 1.41
-1 13 0 43.45 1.44
-1 13 0 44.54 1.36
-1 13 0 44.96 1.35
-1 13 0 41.57 1.37
-1 13 0 44.68 1.35
1 13 0 44.77 1.35
1 13 0 42.74 1.4
1 13 0 43.57 1.39
1 13 0 43.52 1.45
-3 -13 0 35.8 1.11
-3 -13 0 34.9 1.12
-3 -13 0 34.75 1.12
3 -13 0 34.87 1.13
3 -13 0 35.56 1.09
-3 -13 0 35.2 1.11
3 -13 0 35.73 1.12
3 13 0 33.44 1.18
-3 13 0 33.68 1.04
3 13 0 33.7 1.11
-3 13 0 33.42 1.06
-3 13 0 33.87 1.15
-3 13 0 33.76 1.04
5 -13 0 23.75 0.8
5 -13 0 24.22 0.81
-5 -13 0 25.06 0.8
-5 -13 0 24.44 0.81
-5 -13 0 25.37 0.79
-5 13 0 19.35 0.74
-5 13 0 18.62 0.61
5 13 0 20.13 0.8
5 13 0 19.84 0.71
-5 13 0 18.96 0.6
-5 13 0 18.51 0.6
-7 -13 0 11.09 0.42
7 -13 0 10.87 0.43
-7 -13 0 10.34 0.43
7 -13 0 10.86 0.42
-7 13 0 7.06 0.24
7 13 0 6.92 0.42
-7 13 0 7.11 0.23
-7 13 0 6.42 0.39
7 13 0 7.12 0.53
-9 -13 0 33.62 1.11
9 -13 0 33.36 1.1
-9 -13 0 34.08 1.1
9 -13 0 34.68 1.11
9 13 0 26.27 0.94
9 13 0 23.7 1.07
-9 13 0 25.75 0.79
-9 13 0 25.42 0.85
-9 13 0 26.39 0.79
11 -13 0 3.38 0.25
-11 -13 0 3.72 0.26
-11 -13 0 3.11 0.25
11 13 0 1.22 0.44
-11 13 0 1.45 0.1
-11 13 0 1.36 0.17
11 13 0 1.87 0.31
-11 13 0 1.32 0.1
-13 -13 0 4.36 0.35
-13 -13 0 4.01 0.29
13 13 0 3.57 0.34
-13 13 0 3.47 0.17
13 13 0 2.66 0.55
-13 13 0 4.05 0.28
-15 -13 0 7.7 0.42
-15 -13 0 8.27 0.47
-15 13 0 6.62 0.26
15 13 0 5.82 0.51
-15 13 0 6.42 0.36
15 13 0 4.85 0.73
-17 -13 0 0.53 0.26
-17 -13 0 0.55 0.25
-17 13 0 -0.09 0.19
17 13 0 -0.42 0.52
17 13 0 -0.32 0.29
-19 -13 0 12.9 0.59
-19 -13 0 12.64 0.66
19 13 0 10.22 0.63
19 13 0 10.32 1
-19 13 0 10.48 0.51
-21 -13 0 1.16 0.33
-21 -13 0 1.05 0.29
21 13 0 0.9 0.67
-21 13 0 0.58 0.25
21 13 0 1.24 0.35
-23 -13 0 5.78 0.44
-23 -13 0 4.95 0.45
23 13 0 5.78 0.94
-23 13 0 6.32 0.49
23 13 0 6.21 0.56
-25 -13 0 0.33 0.38
-25 -13 0 0.28 0.34
-25 13 0 0.08 0.31
-27 -13 0 1.01 0.4
-27 -13 0 1.79 0.43
-27 13 0 1.03 0.35
0 -14 0 3.91 0.16
0 -14 0 4.28 0.2
0 -14 0 4.01 0.17
0 14 0 1.54 0.17
0 14 0 2.24 0.18
0 14 0 1.16 0.1
0 14 0 1.61 0.19
-2 -14 0 56.89 1.8
2 -14 0 56.63 1.79
-2 -14 0 56.73 1.77
-2 -14 0 56.33 1.76
2 -14 0 57.09 1.77
-2 -14 0 58.73 1.77
-2 14 0 51.99 1.54
-2 14 0 49.73 1.54
-2 14 0 46.17 1.55
-2 14 0 49.81 1.63
2 14 0 47.71 1.58
2 14 0 51.46 1.67
2 14 0 49.8 1.6
-2 14 0 48.37 1.59
-2 14 0 51.32 1.54
4 -14 0 43.89 1.36
4 -14 0 42.89 1.34
-4 -14 0 41.05 1.34
-4 -14 0 41.14 1.34
4 -14 0 41.29 1.3
-4 -14 0 43.1 1.33
-4 -14 0 43.33 1.32
-4 14 0 36.62 1.14
-4 14 0 36.74 1.15
-4 14 0 35.95 1.14
4 14 0 36.74 1.3
4 14 0 37.28 1.23
-4 14 0 37.66 1.26
6 -14 0 16.85 0.58
6 -14 0 17.15 0.58
-6 -14 0 16.09 0.57
-6 -14 0 15.79 0.58
-6 -14 0 16.45 0.55
-6 14 0 17.2 0.53
-6 14 0 17.01 0.54
6 14 0 15.51 0.64
6 14 0 16.98 0.77
-6 14 0 17 0.67
-8 -14 0 82.26 2.52
-8 -14 0 81.5 2.52
8 -14 0 78.94 2.51
8 -14 0 81.01 2.52
-8 14 0 66.32 2.02
8 14 0 65.77 2.26
8 14 0 65.93 2.13
-8 14 0 64.2 2.15
-8 14 0 68.54 2.02
10 -14 0 18.83 0.67
-10 -14 0 18.75 0.69
-10 -14 0 19.03 0.67
-10 14 0 13.14 0.4
10 14 0 10.12 0.76
10 14 0 12.23 0.58
-10 14 0 12.04 0.48
-10 14 0 12.71 0.39
12 -14 0 1.56 0.2
-12 -14 0 1.65 0.23
-12 -14 0 1.8 0.23
-12 14 0 0.47 0.07
12 14 0 0.13 0.44
-12 14 0 0.46 0.07
12 14 0 0.37 0.26
-12 14 0 0.51 0.16
-14 -14 0 6.56 0.42
-14 -14 0 5.68 0.41
-14 14 0 5.61 0.23
-14 14 0 5.52 0.33
14 14 0 5.62 0.52
-14 14 0 5.84 0.22
14 14 0 3.59 0.63
-16 -14 0 0.43 0.25
-16 -14 0 0.3 0.26
-16 14 0 0.1 0.19
16 14 0 -0.15 0.3
16 14 0 -0.16 0.54
-18 -14 0 13.68 0.67
-18 -14 0 12.79 0.59
-18 14 0 10.39 0.49
18 14 0 8.72 0.98
18 14 0 11.56 0.64
-20 -14 0 0.28 0.3
-20 -14 0 -0.07 0.29
20 14 0 1.11 0.65
20 14 0 1.07 0.36
-20 14 0 0.44 0.24
-22 -14 0 7.63 0.61
-22 -14 0 7.51 0.58
22 14 0 7.11 0.6
-22 14 0 6.24 0.49
22 14 0 5.31 0.89
-24 -14 0 1.94 0.37
-24 -14 0 2.69 0.43
24 14 0 3.46 0.89
-24 14 0 1.63 0.33
24 14 0 2.69 0.41
-26 -14 0 0.2 0.38
-26 -14 0 0.08 0.38
-26 14 0 0.51 0.32
-1 -15 0 13.23 0.45
1 -15 0 13.21 0.46
-1 -15 0 12.63 0.44
-1 -15 0 13.7 0.51
-1 -15 0 12.65 0.43
1 -15 0 13.32 0.41
1 -15 0 12.73 0.49
-1 15 0 8.65 0.37
-1 15 0 8.69 0.45
-1 15 0 8.87 0.33
1 15 0 8.32 0.4
1 15 0 7.95 0.4
1 15 0 8.52 0.47
-1 15 0 7.94 0.42
3 -15 0 42.11 1.32
-3 -15 0 41.31 1.31
3 -15 0 42 1.34
-3 -15 0 40.74 1.3
-3 -15 0 42.21 1.31
-3 15 0 41.32 1.28
-3 15 0 39.6 1.3
3 15 0 41.75 1.43
3 15 0 41.87 1.37
-3 15 0 42.22 1.4
5 -15 0 27.41 0.9
-5 -15 0 27.94 0.9
5 -15 0 26.99 0.91
-5 -15 0 28.54 0.88
-5 -15 0 26.42 0.9
-5 15 0 22.08 0.75
-5 15 0 23.97 0.89
-5 15 0 23.6 0.74
5 15 0 24.66 0.98
5 15 0 23.66 0.85
7 -15 0 31.62 1.05
7 -15 0 31.44 1.04
-7 -15 0 31.21 1.05
-7 -15 0 32.53 1.01
-7 -15 0 32.45 1.04
7 15 0 22.34 0.98
-7 15 0 23.76 0.71
-7 15 0 22.91 0.87
7 15 0 22.18 0.84
-7 15 0 22.7 0.72
9 -15 0 7.1 0.34
9 -15 0 6.3 0.33
-9 -15 0 6.22 0.35
-9 -15 0 5.8 0.33
-9 15 0 4.95 0.4
9 15 0 3.85 0.49
-9 15 0 5.04 0.28
-9 15 0 5.2 0.18
9 15 0 4.54 0.41
-9 15 0 4.91 0.19
-11 -15 0 9.11 0.43
11 -15 0 8.88 0.4
-11 -15 0 8.7 0.46
11 15 0 8.08 0.76
-11 15 0 9.9 0.32
11 15 0 9.34 0.55
-11 15 0 9.75 0.42
-13 -15 0 1.69 0.25
-13 -15 0 2.21 0.26
13 15 0 0.63 0.3
-13 15 0 0.71 0.18
-13 15 0 0.96 0.09
13 15 0 0.13 0.48
-15 -15 0 9.8 0.54
-15 -15 0 10.21 0.52
-15 15 0 5.85 0.29
15 15 0 5.73 0.47
-15 15 0 5.99 0.22
15 15 0 4.17 0.69
-15 15 0 5.61 0.37
-17 -15 0 4.96 0.38
-17 -15 0 5.95 0.49
-17 15 0 3.16 0.18
17 15 0 2.23 0.65
17 15 0 3.37 0.41
-17 15 0 3.03 0.27
-19 -15 0 1.54 0.33
-19 -15 0 2.01 0.33
19 15 0 2.65 0.4
19 15 0 1.84 0.68
-19 15 0 2.72 0.28
-21 -15 0 2.65 0.37
-21 -15 0 2.4 0.36
21 15 0 3.15 0.79
21 15 0 3.62 0.45
-21 15 0 3.5 0.33
-23 -15 0 2.95 0.43
-23 -15 0 3.19 0.42
23 15 0 3.47 0.43
-23 15 0 2.41 0.33
23 15 0 3.01 0.93
-25 -15 0 3.01 0.45
-25 -15 0 2.61 0.43
-25 15 0 2.02 0.35
25 15 0 3.13 0.93
-27 -15 0 0.05 0.41
-27 -15 0 -0.13 0.41
-27 15 0 -0.31 0.33
0 -16 0 13.09 0.46
0 -16 0 13.12 0.51
0 -16 0 12.8 0.42
0 -16 0 12.64 0.42
0 16 0 11.95 0.46
0 16 0 13.03 0.55
0 16 0 12.7 0.5
0 16 0 13.27 0.59
-2 -16 0 48.28 1.48
2 -16 0 48.08 1.49
-2 -16 0 46.36 1.52
-2 -16 0 46.81 1.47
2 -16 0 46.27 1.51
-2 -16 0 47.4 1.47
2 16 0 43.64 1.49
-2 16 0 46.24 1.43
2 16 0 47.23 1.57
-2 16 0 45.12 1.45
-2 16 0 46.32 1.54
-2 16 0 45.71 1.49
-4 -16 0 15.84 0.54
4 -16 0 15.99 0.58
4 -16 0 16.11 0.56
-4 -16 0 15.53 0.56
-4 -16 0 16.02 0.54
4 16 0 13.23 0.67
4 16 0 13.18 0.57
-4 16 0 13.78 0.45
-4 16 0 13.65 0.62
-4 16 0 12.91 0.48
-6 -16 0 9.69 0.4
-6 -16 0 9.91 0.38
6 -16 0 10.08 0.44
6 -16 0 10.53 0.42
-6 -16 0 10.09 0.42
-6 16 0 6.39 0.43
-6 16 0 6.61 0.27
6 16 0 6.44 0.55
-6 16 0 6.75 0.24
6 16 0 6.77 0.42
-8 -16 0 13.27 0.52
8 -16 0 13.4 0.52
8 -16 0 14 0.53
-8 -16 0 13.04 0.53
-8 16 0 15.49 0.7
8 16 0 15.55 0.84
-8 16 0 15.27 0.5
-8 16 0 15.99 0.49
8 16 0 14.53 0.66
-10 -16 0 9.52 0.46
10 -16 0 9.7 0.45
-10 -16 0 9.84 0.44
10 16 0 6.51 0.69
-10 16 0 6.48 0.47
-10 16 0 7.29 0.34
-10 16 0 7.27 0.25
10 16 0 7.79 0.55
12 -16 0 13.05 0.54
-12 -16 0 13.36 0.57
-12 -16 0 13.98 0.6
-12 16 0 11.92 0.38
-12 16 0 11.95 0.48
12 16 0 11.92 0.62
12 16 0 9.55 0.85
-14 -16 0 7.13 0.46
-14 -16 0 8.41 0.49
14 16 0 5 0.7
14 16 0 6.8 0.58
-14 16 0 6.92 0.38
-16 -16 0 3.7 0.35
-16 -16 0 3.05 0.33
16 16 0 1.12 0.6
16 16 0 1.91 0.38
-16 16 0 1.86 0.24
-18 -16 0 6.21 0.45
-18 -16 0 6 0.45
-18 16 0 7.82 0.28
18 16 0 7.12 0.62
-18 16 0 7.47 0.44
18 16 0 6.55 0.89
-20 -16 0 9.41 0.63
-20 -16 0 8.4 0.59
20 16 0 9.84 0.66
-20 16 0 8.49 0.51
20 16 0 7.79 1.01
-22 -16 0 6.34 0.5
-22 -16 0 5.41 0.46
22 16 0 4.51 0.89
-22 16 0 4.84 0.38
22 16 0 5.5 0.52
-24 -16 0 11.67 0.69
-24 -16 0 12.84 0.77
24 16 0 12.02 0.76
24 16 0 9.09 1.11
-24 16 0 8.96 0.61
-26 -16 0 0.96 0.41
-26 -16 0 0.43 0.42
-26 16 0 -0.2 0.31
26 16 0 0.83 0.89
1 -17 0 15.12 0.54
1 -17 0 14.59 0.57
-1 -17 0 15.59 0.58
-1 -17 0 15.44 0.53
-1 -17 0 15.85 0.51
-1 -17 0 15.26 0.5
1 17 0 16.13 0.64
-1 17 0 17.39 0.73
-1 17 0 15.32 0.6
-1 17 0 16.03 0.65
1 17 0 16.31 0.71
-1 17 0 15.92 0.57
3 -17 0 25.64 0.87
-3 -17 0 25.36 0.83
-3 -17 0 25.5 0.84
-3 -17 0 26.24 0.83
-3 -17 0 25.66 0.9
3 -17 0 25.35 0.85
3 17 0 28.45 1.01
-3 17 0 27.51 0.94
3 17 0 28.14 1.08
-3 17 0 28.94 1
-3 17 0 28.22 1.04
-3 17 0 28.96 0.91
-5 -17 0 19.81 0.68
-5 -17 0 20.17 0.66
5 -17 0 19.25 0.67
5 -17 0 19.86 0.71
-5 -17 0 19.09 0.68
5 17 0 20.67 0.9
-5 17 0 20.68 0.66
-5 17 0 19.94 0.69
-5 17 0 21.57 0.84
5 17 0 20.21 0.79
-7 -17 0 10.19 0.45
-7 -17 0 10.13 0.39
-7 -17 0 9.64 0.44
7 -17 0 10.94 0.44
7 -17 0 10.01 0.42
7 17 0 8.2 0.5
-7 17 0 8.59 0.51
-7 17 0 9.04 0.34
7 17 0 8.68 0.66
-7 17 0 9.27 0.31
-9 -17 0 7 0.42
-9 -17 0 7.88 0.39
9 -17 0 7.41 0.38
9 -17 0 7.81 0.42
-9 17 0 4.61 0.2
-9 17 0 4.94 0.18
9 17 0 5.14 0.43
-9 17 0 3.68 0.41
9 17 0 3.99 0.55
-9 17 0 4.53 0.29
-11 -17 0 7.18 0.43
11 -17 0 7.86 0.4
-11 -17 0 8.71 0.47
-11 17 0 6.49 0.36
-11 17 0 7.1 0.25
11 17 0 7.36 0.58
11 17 0 5.88 0.66
-11 17 0 6.7 0.5
-13 -17 0 34.91 1.21
-13 -17 0 35.72 1.19
13 -17 0 33.79 1.17
-13 17 0 31.54 1.03
13 17 0 31.61 1.16
13 17 0 27.82 1.41
-15 -17 0 6.15 0.47
-15 -17 0 4.32 0.34
-15 17 0 5.38 0.36
15 17 0 3.68 0.7
15 17 0 5.62 0.49
-17 -17 0 5.08 0.39
-17 -17 0 6.27 0.44
17 17 0 5.28 0.8
-17 17 0 7.01 0.42
17 17 0 6.71 0.61
-19 -17 0 17.4 0.79
-19 -17 0 17.88 0.83
-19 17 0 14.26 0.62
19 17 0 14.19 1.18
19 17 0 16.39 0.81
-21 -17 0 12.74 0.74
-21 -17 0 12.5 0.71
21 17 0 11.04 0.71
-21 17 0 9.01 0.52
21 17 0 8.65 1.02
-23 -17 0 15.75 0.83
-23 -17 0 16.49 0.84
-23 17 0 11.29 0.65
23 17 0 12.61 1.32
23 17 0 14.81 0.84
-25 -17 0 2.02 0.45
-25 -17 0 1.43 0.43
-25 17 0 1.21 0.34
25 17 0 1.83 0.89
0 -18 0 18.2 0.58
0 -18 0 18.85 0.63
0 -18 0 17.46 0.57
0 -18 0 17.92 0.66
0 18 0 16.66 0.73
0 18 0 16.51 0.66
-2 -18 0 4.13 0.2
2 -18 0 4.03 0.25
2 -18 0 3.71 0.29
-2 -18 0 4.24 0.24
-2 -18 0 3.92 0.23
-2 -18 0 4.25 0.31
-2 18 0 6.72 0.47
-2 18 0 6.98 0.31
2 18 0 6.12 0.42
2 18 0 6.92 0.5
-2 18 0 6.88 0.41
-4 -18 0 11.09 0.49
4 -18 0 10.83 0.49
4 -18 0 10.89 0.44
-4 -18 0 11.38 0.45
-4 -18 0 10.93 0.41
-4 -18 0 10.49 0.43
4 18 0 8.41 0.49
-4 18 0 9.44 0.34
-4 18 0 9.08 0.49
-4 18 0 8.79 0.51
-4 18 0 8.47 0.39
4 18 0 8.94 0.6
-6 -18 0 23.26 0.81
-6 -18 0 22.79 0.81
-6 -18 0 25.02 0.78
6 -18 0 23.51 0.83
6 -18 0 22.68 0.8
-6 18 0 15.44 0.57
-6 18 0 16.17 0.54
-6 18 0 16.83 0.72
6 18 0 16.44 0.84
6 18 0 16.73 0.73
-8 -18 0 10.01 0.45
-8 -18 0 9.89 0.47
8 -18 0 9.92 0.48
-8 -18 0 10.29 0.4
8 -18 0 10.63 0.46
-8 18 0 5.85 0.46
8 18 0 5.06 0.57
8 18 0 5.9 0.48
-8 18 0 6.04 0.23
-10 -18 0 18.89 0.7
10 -18 0 18.49 0.7
-10 -18 0 18.75 0.64
-10 -18 0 19.1 0.72
-10 18 0 14.12 0.73
10 18 0 13.36 0.91
-10 18 0 15.27 0.56
10 18 0 14.38 0.71
-10 18 0 14.76 0.47
12 -18 0 23.66 0.86
-12 -18 0 23.65 0.87
-12 -18 0 22.22 0.85
12 18 0 20.08 0.86
-12 18 0 19.51 0.71
12 18 0 17.85 1.1
-12 18 0 19.67 0.89
14 -18 0 8.46 0.45
-14 -18 0 8.3 0.53
-14 -18 0 7.2 0.48
14 18 0 6.74 0.82
-14 18 0 6.96 0.39
14 18 0 6.85 0.57
-16 -18 0 9.69 0.58
-16 -18 0 8.96 0.51
16 18 0 8.42 0.6
16 18 0 6.81 0.89
-16 18 0 7.83 0.43
-18 -18 0 16.09 0.75
-18 -18 0 14.39 0.68
18 18 0 13.77 0.72
-18 18 0 12.96 0.57
18 18 0 12.92 1.15
-20 -18 0 18.4 0.83
-20 -18 0 17.88 0.85
-20 18 0 15.05 0.67
20 18 0 15.3 1.28
20 18 0 17.02 0.88
-22 -18 0 16.9 0.86
-22 -18 0 14.85 0.8
22 18 0 13.03 0.82
22 18 0 13.66 1.31
-22 18 0 10.22 0.61
-24 -18 0 1.95 0.41
-24 -18 0 2.07 0.43
-24 18 0 1.77 0.34
24 18 0 3.19 0.51
24 18 0 2.3 0.88
-1 -19 0 10.29 0.41
-1 -19 0 10.65 0.48
1 -19 0 10.79 0.42
1 -19 0 10.75 0.47
-1 -19 0 10.51 0.38
-1 -19 0 10.6 0.37
1 19 0 6.73 0.48
-1 19 0 7.67 0.48
1 19 0 7.31 0.52
-1 19 0 7.82 0.51
-3 -19 0 4.51 0.27
3 -19 0 4.75 0.33
-3 -19 0 5.01 0.23
3 -19 0 4.34 0.29
-3 -19 0 5.25 0.35
-3 -19 0 4.57 0.25
-3 19 0 2.43 0.35
3 19 0 1.72 0.3
-3 19 0 1.69 0.16
3 19 0 1.44 0.36
-3 19 0 1.36 0.27
-5 -19 0 13.62 0.48
5 -19 0 13 0.52
-5 -19 0 13.15 0.51
5 -19 0 12.7 0.56
-5 19 0 7.95 0.31
5 19 0 7.01 0.49
-5 19 0 7.38 0.45
-5 19 0 7.89 0.51
5 19 0 7.74 0.63
-7 -19 0 7.35 0.39
-7 -19 0 7.5 0.33
-7 -19 0 7.86 0.4
7 -19 0 7.34 0.4
7 -19 0 7.81 0.38
7 19 0 7.83 0.7
-7 19 0 7.95 0.3
-7 19 0 7.86 0.52
7 19 0 8.41 0.53
-9 -19 0 9.49 0.47
9 -19 0 10.4 0.45
-9 -19 0 9.25 0.4
9 -19 0 9.62 0.49
-9 -19 0 9.31 0.46
-9 19 0 6.29 0.26
-9 19 0 6.04 0.5
9 19 0 5.8 0.63
9 19 0 7 0.59
-11 -19 0 28.01 0.96
-11 -19 0 27.2 0.97
11 -19 0 26.9 0.95
-11 -19 0 26.32 0.89
11 19 0 19.64 0.91
-11 19 0 19.43 0.7
11 19 0 18.12 1.16
-11 19 0 18.84 0.85
-13 -19 0 5.11 0.37
-13 -19 0 4.27 0.34
13 -19 0 5.85 0.44
-13 19 0 3.79 0.27
13 19 0 3.22 0.43
-13 19 0 3.64 0.46
13 19 0 2.98 0.65
-15 -19 0 6.31 0.49
-15 -19 0 6.42 0.53
15 19 0 4.31 0.76
-15 19 0 5.15 0.37
15 19 0 5.17 0.48
-17 -19 0 12.81 0.66
-17 -19 0 13.97 0.72
17 19 0 12.47 0.77
17 19 0 11.17 1.1
-17 19 0 11.67 0.54
-19 -19 0 12.4 0.73
-19 -19 0 12.08 0.67
-19 19 0 9.26 0.49
19 19 0 8.01 0.97
19 19 0 10.91 0.73
-21 -19 0 11.04 0.69
-21 -19 0 11.23 0.71
-21 19 0 6.15 0.49
21 19 0 6.28 0.98
21 19 0 8.7 0.7
-23 -19 0 4.07 0.48
-23 -19 0 3.74 0.46
23 19 0 3.52 0.49
23 19 0 3.37 1
-23 19 0 2.44 0.51
25 19 0 0.55 0.87
0 -20 0 33.2 1.04
0 -20 0 34.09 1.15
0 -20 0 34.1 1.1
0 20 0 26.34 0.98
0 20 0 26.94 1.06
-2 -20 0 5.29 0.28
2 -20 0 5.06 0.31
-2 -20 0 5.06 0.41
-2 -20 0 5.36 0.26
2 -20 0 5.26 0.36
-2 20 0 2.5 0.3
-2 20 0 2.62 0.21
2 20 0 3.01 0.41
-2 20 0 2.9 0.36
2 20 0 2.51 0.32
-4 -20 0 16.47 0.58
4 -20 0 16.09 0.6
4 -20 0 16.86 0.64
-4 -20 0 15.44 0.58
-4 -20 0 16.07 0.68
-4 20 0 11.68 0.66
-4 20 0 10.79 0.42
4 20 0 10.41 0.58
-4 20 0 10.64 0.55
4 20 0 11.83 0.71
6 -20 0 16.4 0.63
6 -20 0 16.4 0.67
-6 -20 0 16.2 0.62
-6 -20 0 16.32 0.58
6 20 0 14.87 0.69
6 20 0 14.85 0.85
-6 20 0 14.44 0.51
-6 20 0 15.35 0.76
-6 20 0 13.88 0.64
8 -20 0 2.66 0.29
-8 -20 0 2.6 0.25
8 -20 0 2.68 0.27
-8 -20 0 2.3 0.24
-8 -20 0 2.34 0.2
8 20 0 1.38 0.35
-8 20 0 1.19 0.36
8 20 0 1.56 0.5
-10 -20 0 0.94 0.17
-10 -20 0 1.34 0.24
10 -20 0 1.2 0.27
-10 -20 0 0.83 0.24
10 20 0 0.4 0.51
-10 20 0 0.15 0.18
10 20 0 0.12 0.38
-10 20 0 0.31 0.31
-12 -20 0 7.31 0.36
-12 -20 0 8.18 0.51
-12 -20 0 7.21 0.47
12 -20 0 8.66 0.49
-12 20 0 6.63 0.61
12 20 0 6.2 0.55
-12 20 0 5.84 0.37
12 20 0 5.12 0.71
14 -20 0 4.2 0.37
-14 -20 0 3.94 0.35
-14 -20 0 3.69 0.35
14 20 0 2.24 0.68
-14 20 0 3.07 0.27
-14 20 0 2.81 0.43
14 20 0 3.46 0.49
-16 -20 0 7.92 0.54
-16 -20 0 8.26 0.57
16 20 0 6.65 0.57
-16 20 0 6.71 0.62
16 20 0 5.43 0.88
-16 20 0 6.84 0.42
-18 -20 0 2.89 0.37
-18 -20 0 2.33 0.36
18 20 0 3.67 0.51
-18 20 0 2.7 0.29
18 20 0 2.42 0.77
-20 -20 0 1.13 0.39
-20 -20 0 1.51 0.38
-20 20 0 0.42 0.26
20 20 0 1.01 0.74
20 20 0 1.12 0.43
-22 -20 0 4.09 0.48
-22 -20 0 4.13 0.47
22 20 0 3.12 0.88
22 20 0 4.06 0.51
-24 -20 0 1.81 0.44
-24 -20 0 0.97 0.42
24 20 0 1.39 0.88
-1 -21 0 29.34 0.93
-1 -21 0 29.1 1.03
-1 -21 0 29.14 0.98
1 -21 0 30.25 1.04
1 -21 0 29.69 0.98
1 21 0 28.38 1.13
-1 21 0 28.01 1.1
-1 21 0 28.18 1.05
1 21 0 26.55 1.03
3 -21 0 27.3 0.91
3 -21 0 26.56 0.95
-3 -21 0 26.77 0.98
-3 -21 0 26.02 0.88
-3 -21 0 27.06 0.89
3 21 0 26.49 1.13
-3 21 0 25.75 1.03
3 21 0 25.62 0.98
-3 21 0 25.32 0.98
-3 21 0 24.34 0.86
-5 -21 0 26.9 0.99
5 -21 0 27.86 0.96
-5 -21 0 27.73 0.91
5 -21 0 27.16 0.93
-5 -21 0 27 0.92
5 21 0 21.63 0.88
-5 21 0 21.46 0.72
5 21 0 20.75 1.02
-5 21 0 20.18 0.84
-5 21 0 22.29 0.92
7 -21 0 0.81 0.24
-7 -21 0 0.72 0.17
-7 -21 0 0.6 0.2
7 -21 0 0.82 0.21
7 21 0 1.07 0.49
-7 21 0 1.55 0.3
7 21 0 1.86 0.36
-7 21 0 1.26 0.37
-9 -21 0 5.12 0.38
-9 -21 0 5.14 0.4
-9 -21 0 5.31 0.3
9 -21 0 5.49 0.4
9 -21 0 5.85 0.42
9 21 0 2.66 0.57
9 21 0 3.5 0.46
-9 21 0 2.85 0.39
-11 -21 0 8.41 0.52
-11 -21 0 9.36 0.4
-11 -21 0 9.82 0.5
11 -21 0 9.11 0.53
-11 21 0 8 0.41
11 21 0 7.75 0.7
-11 21 0 7.69 0.59
11 21 0 7.7 0.78
-13 -21 0 2.51 0.31
-13 -21 0 2.84 0.32
13 -21 0 3.14 0.34
-13 -21 0 2.61 0.23
13 21 0 2.33 0.43
-13 21 0 1.74 0.4
13 21 0 2.22 0.67
-13 21 0 2.14 0.24
-15 -21 0 3.86 0.37
-15 -21 0 3.8 0.37
-15 21 0 3.24 0.28
15 21 0 3.88 0.52
-15 21 0 3.04 0.46
15 21 0 2.7 0.8
-17 -21 0 4.62 0.42
-17 -21 0 4.34 0.39
17 21 0 3.15 0.8
-17 21 0 4.87 0.34
-17 21 0 5.31 0.59
17 21 0 5.34 0.56
-19 -21 0 -0.42 0.34
-19 -21 0 0.29 0.34
19 21 0 1.01 0.75
19 21 0 0.96 0.45
-21 -21 0 4.5 0.48
-21 -21 0 4.98 0.49
21 21 0 3.68 0.9
21 21 0 4.85 0.54
-23 -21 0 0.84 0.41
-23 -21 0 0.87 0.4
23 21 0 2.51 0.49
23 21 0 1.07 0.94
0 -22 0 169.1 5.15
0 -22 0 166.96 5.2
0 22 0 153.4 4.89
0 22 0 154.73 4.82
2 -22 0 62.04 1.92
-2 -22 0 61.61 1.91
2 -22 0 59.45 1.96
-2 -22 0 60.56 1.88
-2 -22 0 59.17 1.96
2 22 0 55.99 1.93
-2 22 0 58.87 2
2 22 0 58.24 2.04
-2 22 0 58.82 1.94
-4 -22 0 41.61 1.31
4 -22 0 40.87 1.38
4 -22 0 40.73 1.33
-4 -22 0 41.19 1.31
-4 -22 0 39.13 1.38
-4 22 0 31.93 1.18
4 22 0 32.23 1.34
4 22 0 32.44 1.21
-4 22 0 33.21 1.07
-4 22 0 33.95 1.26
6 -22 0 8.5 0.48
6 -22 0 9.5 0.43
-6 -22 0 7.9 0.51
-6 -22 0 8.69 0.43
-6 -22 0 9.62 0.4
6 22 0 7.97 0.84
6 22 0 8.03 0.58
-6 22 0 7.65 0.52
-6 22 0 7.98 0.59
-8 -22 0 15.38 0.56
8 -22 0 15.24 0.68
8 -22 0 14.96 0.64
-8 -22 0 15.29 0.62
-8 22 0 13.03 0.71
8 22 0 13.81 0.78
8 22 0 12.15 0.92
-8 22 0 12.69 0.68
-10 -22 0 11.95 0.48
-10 -22 0 11.96 0.57
10 -22 0 11.43 0.57
-10 -22 0 12.21 0.56
10 22 0 7.51 0.64
10 22 0 7.25 0.77
-10 22 0 8.26 0.4
-10 22 0 7.54 0.6
12 -22 0 3.82 0.35
-12 -22 0 3.65 0.33
-12 -22 0 3.47 0.25
-12 -22 0 3.36 0.32
12 22 0 2.68 0.67
-12 22 0 3.25 0.27
12 22 0 3.1 0.47
-12 22 0 3.33 0.44
14 -22 0 6.65 0.47
-14 -22 0 7.08 0.54
-14 -22 0 5.87 0.5
-14 22 0 5.63 0.4
14 22 0 6.17 0.55
14 22 0 4.46 0.78
-14 22 0 6.06 0.6
-16 -22 0 4.3 0.4
-16 -22 0 5 0.42
-16 22 0 5.18 0.59
-16 22 0 5.51 0.41
16 22 0 5.78 0.59
16 22 0 4.08 0.81
-18 -22 0 0.44 0.35
-18 -22 0 0.74 0.34
-18 22 0 0.82 0.49
18 22 0 1.47 0.85
18 22 0 2.09 0.51
-20 -22 0 2.75 0.42
-20 -22 0 2.8 0.42
-20 22 0 2.32 0.57
20 22 0 2.7 0.93
20 22 0 3.5 0.51
-22 -22 0 0.45 0.4
-22 -22 0 0.31 0.39
-22 22 0 0.56 0.49
22 22 0 0.98 0.84
22 22 0 2.61 0.5
1 -23 0 71.52 2.2
1 -23 0 67.9 2.24
-1 -23 0 68.45 2.25
-1 -23 0 70.62 2.19
-1 23 0 69.46 2.31
-1 23 0 64.67 2.19
1 23 0 68.33 2.3
1 23 0 63.73 2.19
-3 -23 0 54.37 1.7
-3 -23 0 56.54 1.72
3 -23 0 52.96 1.78
3 -23 0 54.64 1.74
-3 -23 0 52.86 1.79
3 23 0 45 1.68
-3 23 0 44.42 1.54
-3 23 0 44.76 1.62
3 23 0 44.16 1.56
5 -23 0 16.46 0.63
5 -23 0 15.08 0.65
-5 -23 0 15.46 0.58
-5 -23 0 15.46 0.72
-5 -23 0 15.36 0.59
-5 23 0 12.64 0.77
-5 23 0 11.78 0.68
5 23 0 12.24 0.85
5 23 0 12.42 0.75
-7 -23 0 10.51 0.5
-7 -23 0 9.66 0.62
7 -23 0 10.78 0.58
-7 -23 0 10.93 0.44
7 -23 0 10.89 0.53
-7 23 0 8.57 0.62
-7 23 0 8.23 0.56
7 23 0 8.33 0.78
7 23 0 7.6 0.69
-9 -23 0 8.99 0.42
-9 -23 0 9.05 0.5
9 -23 0 9.62 0.56
-9 23 0 6.8 0.52
9 23 0 6.13 0.73
-9 23 0 6.3 0.59
9 23 0 5.75 0.53
11 -23 0 6.34 0.5
-11 -23 0 5.61 0.34
-11 -23 0 5.34 0.43
-11 -23 0 5.93 0.47
-11 23 0 4.77 0.52
11 23 0 3.81 0.7
-11 23 0 4.33 0.3
11 23 0 5.18 0.57
-13 -23 0 2.83 0.34
-13 -23 0 2.48 0.32
13 -23 0 3.05 0.37
-13 23 0 2.13 0.29
13 23 0 2.6 0.53
13 23 0 2.08 0.7
-13 23 0 2.47 0.48
-15 -23 0 0.67 0.31
15 -23 0 0.77 0.31
-15 -23 0 1.09 0.32
15 23 0 1.03 0.79
-15 23 0 0.74 0.47
15 23 0 1.28 0.51
-17 -23 0 1 0.34
-17 -23 0 0.72 0.33
17 23 0 0.8 0.74
-17 23 0 1.54 0.46
17 23 0 1.4 0.52
-19 -23 0 1.36 0.39
-19 -23 0 1.49 0.38
19 23 0 2.44 0.82
19 23 0 2.29 0.52
-19 23 0 1.44 0.49
-21 -23 0 -0.08 0.39
-21 -23 0 -0.34 0.39
21 23 0 0.93 0.79
-21 23 0 -0.17 0.47
0 -24 0 7.39 0.39
0 -24 0 7.62 0.53
0 24 0 6.67 0.56
0 24 0 7.56 0.66
2 -24 0 12.26 0.52
-2 -24 0 12.34 0.64
-2 -24 0 13.21 0.51
2 -24 0 10.85 0.58
-2 24 0 10.59 0.77
-2 24 0 10.26 0.68
2 24 0 10.41 0.76
2 24 0 10.32 0.65
-4 -24 0 6.51 0.52
-4 -24 0 6.37 0.36
4 -24 0 6.12 0.45
-4 -24 0 6.15 0.33
4 -24 0 5.93 0.4
4 24 0 5.22 0.51
4 24 0 4.77 0.59
-4 24 0 4.55 0.52
-4 24 0 5.17 0.48
-6 -24 0 0.96 0.2
6 -24 0 1.11 0.31
-6 -24 0 0.49 0.34
6 -24 0 1.14 0.25
-6 -24 0 0.9 0.19
6 24 0 0.49 0.38
-6 24 0 0.68 0.42
6 24 0 0.33 0.49
-6 24 0 0.88 0.37
8 -24 0 3.1 0.36
-8 -24 0 2.99 0.24
-8 -24 0 3.5 0.29
-8 -24 0 3.11 0.39
8 -24 0 3.15 0.33
8 24 0 3 0.69
-8 24 0 4.37 0.46
-8 24 0 3.95 0.5
8 24 0 3.18 0.48
-10 -24 0 14.97 0.69
10 -24 0 16.78 0.74
-10 24 0 12.4 0.76
10 24 0 10.74 1.02
10 24 0 12.42 0.86
-10 24 0 12.79 0.56
-10 24 0 12.47 0.72
12 -24 0 3.38 0.4
-12 -24 0 3.84 0.36
-12 -24 0 4 0.36
-12 24 0 1.61 0.46
12 24 0 1.32 0.46
-12 24 0 1.39 0.4
12 24 0 1.72 0.76
-14 -24 0 0.31 0.31
-14 -24 0 0.1 0.29
14 -24 0 0.09 0.3
-14 24 0 -0.22 0.44
14 24 0 -1.21 0.66
14 24 0 0.8 0.51
-16 -24 0 0.94 0.35
-16 -24 0 0.81 0.35
16 24 0 0.72 0.82
-16 24 0 0.38 0.47
16 24 0 0.75 0.52
-18 -24 0 0.4 0.38
-18 -24 0 0.84 0.36
18 24 0 1.56 0.89
-18 24 0 1.84 0.55
18 24 0 2.79 0.56
-20 -24 0 0.87 0.4
-20 -24 0 0.63 0.37
-20 24 0 0.65 0.5
20 24 0 2.82 0.55
20 24 0 2.32 0.94
-1 -25 0 7.41 0.55
1 -25 0 6.57 0.39
1 -25 0 6.51 0.47
-1 -25 0 7.13 0.4
1 25 0 3.84 0.53
-1 25 0 4.01 0.55
1 25 0 3.2 0.43
-1 25 0 2.88 0.41
3 -25 0 1.06 0.3
3 -25 0 0.95 0.24
-3 -25 0 1.12 0.32
-3 -25 0 1.03 0.21
3 25 0 0.47 0.46
-3 25 0 0.54 0.35
3 25 0 0.1 0.36
-3 25 0 0.11 0.42
-5 -25 0 0.25 0.19
-5 -25 0 0.03 0.17
-5 -25 0 0.01 0.33
5 -25 0 0.26 0.24
5 -25 0 0.24 0.32
5 25 0 1.19 0.57
-5 25 0 1.02 0.36
-5 25 0 0.68 0.39
5 25 0 0.56 0.39
7 -25 0 3.67 0.34
-7 -25 0 3.03 0.27
7 -25 0 3.7 0.36
-7 -25 0 3.18 0.4
-7 -25 0 3.83 0.26
-7 25 0 5.23 0.52
-7 25 0 4.82 0.46
7 25 0 4.3 0.72
7 25 0 4.87 0.52
-9 -25 0 5.38 0.44
9 -25 0 6.33 0.45
-9 -25 0 4.91 0.46
9 25 0 5.37 0.59
-9 25 0 4.58 0.51
9 25 0 3.97 0.77
-9 25 0 4.3 0.45
-11 -25 0 3.22 0.34
11 -25 0 4.43 0.43
11 25 0 0.91 0.47
-11 25 0 1.79 0.43
11 25 0 1.55 0.68
-11 25 0 1.87 0.44
-13 -25 0 0.59 0.31
-13 -25 0 0.68 0.31
13 -25 0 -0.03 0.3
13 25 0 0.58 0.53
-13 25 0 0.93 0.47
-13 25 0 0.79 0.41
13 25 0 0.95 0.71
-15 -25 0 1.37 0.35
15 -25 0 1.61 0.39
-15 -25 0 1.54 0.36
-15 25 0 1.35 0.51
15 25 0 0.6 0.75
-15 25 0 1.92 0.44
15 25 0 1.66 0.55
-17 -25 0 3.07 0.42
-17 -25 0 2.62 0.4
17 25 0 3.59 0.6
17 25 0 2.52 0.84
-17 25 0 3.02 0.53
-19 -25 0 3.43 0.43
-19 -25 0 2.56 0.44
-19 25 0 3.15 0.62
19 25 0 3.87 0.92
19 25 0 5.23 0.62
0 -26 0 13.44 0.69
0 -26 0 13.17 0.57
0 26 0 12.84 0.74
0 26 0 13.23 0.92
-2 -26 0 3.52 0.28
2 -26 0 3.86 0.38
-2 -26 0 3.46 0.42
2 -26 0 4.29 0.32
-2 26 0 3.27 0.51
2 26 0 3.85 0.62
2 26 0 3.76 0.5
-2 26 0 4.05 0.5
-4 -26 0 0.44 0.2
4 -26 0 0.35 0.33
-4 -26 0 0.32 0.35
4 -26 0 -0.01 0.25
-4 26 0 0.82 0.47
4 26 0 1.02 0.58
-4 26 0 1.04 0.38
4 26 0 0.8 0.45
6 -26 0 0.23 0.27
-6 -26 0 -0.12 0.18
-6 -26 0 0.3 0.22
6 -26 0 -0.18 0.29
-6 -26 0 0.18 0.32
-6 26 0 0.37 0.4
-6 26 0 0.37 0.41
6 26 0 0.29 0.62
6 26 0 0.32 0.47
-8 -26 0 2.26 0.44
8 -26 0 2.64 0.38
-8 -26 0 2.04 0.27
-8 26 0 0.5 0.42
8 26 0 1.55 0.71
8 26 0 1.52 0.52
-8 26 0 2 0.49
-10 -26 0 0.71 0.27
-10 -26 0 1.52 0.39
10 -26 0 1.02 0.36
-10 26 0 1.3 0.39
10 26 0 1.06 0.67
-10 26 0 1.05 0.42
10 26 0 0.99 0.48
12 -26 0 1.57 0.34
-12 -26 0 1.18 0.32
-12 26 0 1.21 0.5
12 26 0 0.78 0.78
-12 26 0 1.82 0.45
12 26 0 0.35 0.54
-14 -26 0 2.78 0.38
14 -26 0 3.33 0.45
-14 -26 0 2.67 0.38
14 26 0 2.85 0.83
14 26 0 3.68 0.63
-14 26 0 3.87 0.57
-14 26 0 2.97 0.44
-16 -26 0 5.79 0.49
-16 -26 0 7.1 0.58
-16 26 0 5.87 0.68
16 26 0 5.2 0.93
-16 26 0 6.85 0.62
16 26 0 6.85 0.64
-18 -26 0 7.1 0.54
-18 -26 0 6.16 0.51
18 26 0 8.09 0.73
-18 26 0 8.24 0.9
-18 26 0 7.63 0.62
-1 -27 0 4.4 0.31
1 -27 0 4.11 0.32
1 -27 0 3.66 0.4
-1 -27 0 4.35 0.44
-1 27 0 4.21 0.49
1 27 0 4.4 0.54
-1 27 0 4.73 0.58
1 27 0 4.75 0.65
3 -27 0 3.2 0.31
-3 -27 0 3.25 0.43
3 -27 0 3.4 0.38
-3 -27 0 2.66 0.27
-3 27 0 2.8 0.44
-3 27 0 2.96 0.56
3 27 0 2.21 0.57
3 27 0 2.52 0.47
5 -27 0 4.49 0.41
5 -27 0 4.48 0.36
-5 -27 0 4.48 0.47
-5 27 0 3.18 0.45
-5 27 0 3.39 0.55
5 27 0 3.41 0.65
5 27 0 2.85 0.49
-7 -27 0 3 0.41
-7 -27 0 3.31 0.27
7 -27 0 3.24 0.38
7 27 0 2.39 0.5
-7 27 0 2.98 0.49
7 27 0 3.1 0.73
-7 27 0 2.45 0.54
-9 -27 0 4.49 0.51
9 -27 0 4.58 0.46
-9 -27 0 3.69 0.33
9 27 0 3.63 0.75
-9 27 0 4.03 0.48
9 27 0 3.92 0.61
-9 27 0 4.05 0.57
-11 -27 0 11.04 0.6
-11 -27 0 12.13 0.79
11 -27 0 11.91 0.7
11 27 0 9.58 0.76
-11 27 0 8.44 0.83
-11 27 0 9.12 0.75
11 27 0 7.2 0.98
-13 -27 0 2.15 0.35
13 -27 0 2.32 0.41
13 27 0 3.01 0.83
-13 27 0 2.94 0.46
13 27 0 2.5 0.62
-13 27 0 2.84 0.53
-15 -27 0 10.75 0.69
15 -27 0 11.76 0.72
15 27 0 7.85 1.03
15 27 0 8.77 0.77
-15 27 0 11.22 0.81
-15 27 0 10.72 0.92
-17 -27 0 12.74 0.8
-17 -27 0 15.61 0.77
17 27 0 12.36 1.35
17 27 0 13.51 0.99
-17 27 0 11.52 0.9
-17 27 0 13.1 0.86
0 -28 0 2.46 0.29
0 -28 0 2.85 0.39
0 28 0 1.33 0.48
0 28 0 1.41 0.58
-2 -28 0 2.71 0.39
2 -28 0 2.51 0.31
-2 -28 0 3.17 0.3
2 -28 0 3.91 0.44
2 28 0 2.36 0.48
2 28 0 2.53 0.59
-2 28 0 2.33 0.58
-2 28 0 2.66 0.51
4 -28 0 3.69 0.44
4 -28 0 3.43 0.34
-4 -28 0 3.61 0.43
4 28 0 2.3 0.55
-4 28 0 3.25 0.48
-4 28 0 3.59 0.59
4 28 0 3.53 0.71
-6 -28 0 1.77 0.4
6 -28 0 1.25 0.32
6 -28 0 2.43 0.4
-6 28 0 1.47 0.53
6 28 0 0.7 0.62
6 28 0 1.27 0.54
-6 28 0 1.17 0.44
8 -28 0 3.36 0.44
-8 -28 0 3.13 0.44
-8 28 0 2.86 0.47
8 28 0 2.87 0.6
8 28 0 2.3 0.79
-8 28 0 2.73 0.56
10 -28 0 8.62 0.56
-10 -28 0 5.52 0.58
-10 -28 0 5.87 0.4
-10 28 0 4.67 0.62
-10 28 0 4.45 0.51
10 28 0 4.65 0.61
10 28 0 3.65 0.82
12 -28 0 2.25 0.44
-12 -28 0 1.72 0.45
-12 -28 0 2.04 0.34
-12 28 0 2.61 0.53
-12 28 0 3.12 0.48
12 28 0 1.79 0.79
12 28 0 2.83 0.58
14 -28 0 2.32 0.45
-14 -28 0 2.13 0.36
-14 28 0 1.79 0.51
14 28 0 1.48 0.55
-14 28 0 1.48 0.53
14 28 0 1.62 0.83
-16 28 0 14.13 1.04
16 28 0 10.03 1.15
-1 -29 0 1.35 0.42
1 -29 0 1.14 0.41
1 -29 0 1.69 0.28
1 29 0 0.81 0.6
-1 29 0 0.06 0.5
1 29 0 0.94 0.46
-1 29 0 1.24 0.45
3 -29 0 0.82 0.36
-3 -29 0 1.84 0.42
3 -29 0 0.87 0.3
-3 29 0 0.08 0.48
3 29 0 0.94 0.66
3 29 0 0.74 0.51
-3 29 0 0.6 0.49
5 -29 0 0.35 0.3
5 -29 0 0.61 0.39
-5 -29 0 0.84 0.43
5 29 0 -0.01 0.48
-5 29 0 -0.19 0.52
-5 29 0 0.4 0.44
5 29 0 0.21 0.6
-7 -29 0 0.65 0.44
7 -29 0 0.65 0.4
7 29 0 -0.37 0.65
7 29 0 0.16 0.5
-7 29 0 -0.02 0.46
-7 29 0 -0.18 0.47
-9 -29 0 1.57 0.43
9 -29 0 1.41 0.42
-9 29 0 0.61 0.48
9 29 0 0.44 0.53
9 29 0 -0.03 0.78
-9 29 0 0.67 0.44
-11 -29 0 3.8 0.5
-11 -29 0 2.95 0.42
11 -29 0 3.6 0.43
-11 29 0 3.72 0.63
-11 29 0 3.42 0.55
11 29 0 3.32 0.92
11 29 0 2.91 0.67
-13 -29 0 0.3 0.32
-13 -29 0 0.88 0.5
13 -29 0 0.94 0.38
13 29 0 0.85 0.62
-13 29 0 -0.15 0.55
-13 29 0 0.13 0.44
13 29 0 -0.6 0.85
0 -30 0 0.08 0.37
0 30 0 0.2 0.51
0 30 0 -0.08 0.6
2 -30 0 1.22 0.3
-2 -30 0 2.09 0.45
2 -30 0 1.19 0.39
-2 30 0 0.76 0.53
2 30 0 1.39 0.67
2 30 0 0.87 0.54
-2 30 0 0.8 0.52
4 -30 0 0.49 0.41
4 -30 0 0.67 0.3
-4 -30 0 0.32 0.39
-4 30 0 0.18 0.56
-4 30 0 0.53 0.52
4 30 0 0.41 0.56
4 30 0 0.29 0.62
-6 -30 0 0.6 0.41
6 -30 0 0.45 0.36
-6 30 0 -0.23 0.48
6 30 0 -0.36 0.56
6 30 0 0.03 0.66
-6 30 0 -0.66 0.5
-8 -30 0 1.18 0.43
8 -30 0 2.74 0.46
-8 30 0 0.7 0.51
8 30 0 0.61 0.6
8 30 0 0.44 0.72
-8 30 0 0.92 0.46
10 -30 0 3.31 0.48
-10 -30 0 2.94 0.49
10 30 0 2.78 0.67
10 30 0 1.11 0.78
-10 30 0 2.44 0.62
-10 30 0 2.82 0.57
-12 -30 0 0.06 0.5
12 -30 0 0.25 0.4
12 30 0 0.45 0.56
-12 30 0 0.09 0.45
-12 30 0 -0.34 0.49
12 30 0 0.43 0.78
-1 -31 0 1.99 0.47
1 -31 0 1.04 0.46
-1 31 0 1.45 0.66
-1 31 0 1.12 0.5
1 31 0 1.97 0.64
1 31 0 1.78 0.58
3 -31 0 2.87 0.48
-3 -31 0 2.76 0.44
3 31 0 2.1 0.68
-3 31 0 2.69 0.61
-3 31 0 2.23 0.57
3 31 0 2.49 0.61
5 -31 0 0.81 0.43
-5 -31 0 1.05 0.43
5 31 0 0.83 0.68
5 31 0 0.61 0.54
-5 31 0 0.8 0.6
-5 31 0 0.41 0.54
7 -31 0 0.69 0.38
-7 -31 0 1.15 0.49
7 31 0 0.05 0.71
7 31 0 0.38 0.62
-7 31 0 0.18 0.59
-7 31 0 0.21 0.47
-9 -31 0 4.08 0.53
9 -31 0 5.15 0.54
9 31 0 2.68 0.69
-9 31 0 2.28 0.58
-9 31 0 2.97 0.59
9 31 0 1.33 0.89
0 -32 0 0 0.4
0 32 0 0.13 0.59
0 32 0 -0.77 0.49
2 -32 0 1.11 0.46
-2 -32 0 1.75 0.49
-2 32 0 1.15 0.51
2 32 0 0.04 0.71
-2 32 0 -0.17 0.65
2 32 0 0.02 0.52
4 -32 0 2.6 0.49
-4 -32 0 2.47 0.51
-4 32 0 1.95 0.59
-4 32 0 0.85 0.58
4 32 0 1.68 0.71
4 32 0 1.55 0.57
-6 -32 0 0.34 0.49
6 -32 0 1.27 0.46
-6 32 0 1.01 0.57
-6 32 0 1.6 0.53
6 32 0 1.29 0.65
6 32 0 1.21 0.75
-30 0 1 4.49 0.45
-30 0 1 4.73 0.47
-28 0 1 2.8 0.38
-28 0 1 2.7 0.38
-26 0 1 4.01 0.38
-26 0 1 5.03 0.39
-24 0 1 11.25 0.59
-24 0 1 13.31 0.62
-22 0 1 20.95 0.8
-22 0 1 19.74 0.79
-20 0 1 6.19 0.4
-20 0 1 7.32 0.43
18 0 -1 5.02 0.36
-18 0 1 5.16 0.36
-18 0 1 5.69 0.34
-16 0 1 9.51 0.41
-16 0 1 8.42 0.4
16 0 -1 9.26 0.42
14 0 -1 31.41 1.05
-14 0 1 32.23 1.03
-14 0 1 31.14 1.03
-12 0 1 20.42 0.7
12 0 -1 20.99 0.72
12 0 -1 21.83 0.69
-12 0 1 20.69 0.7
-10 0 1 15.17 0.55
-10 0 1 14.68 0.51
10 0 -1 16.08 0.51
10 0 -1 15.23 0.54
-10 0 1 15.09 0.52
8 0 -1 56.13 1.81
-8 0 1 56.69 1.82
-8 0 1 58.47 1.91
8 0 -1 60.08 1.8
-8 0 1 58.36 1.8
8 0 -1 58.2 1.79
-8 0 1 59.93 1.8
-6 0 1 38.95 1.23
6 0 -1 41.43 1.23
-6 0 1 40.15 1.25
-6 0 1 38.21 1.23
6 0 -1 39.69 1.25
6 0 -1 40.47 1.23
4 0 -1 149.84 4.45
4 0 -1 143.24 4.43
-4 0 1 140.37 4.45
4 0 -1 147.61 4.52
-4 0 1 143.19 4.46
-4 0 1 143.87 4.47
-2 0 1 100.53 3.07
-2 0 1 97.44 3.13
2 0 -1 98.29 3.09
-2 0 1 98.14 3.06
2 0 -1 102.69 3.07
2 0 -1 103.29 3.08
0 0 1 60 1.78
0 0 -1 60.31 1.78
0 0 -1 59.73 1.76
0 0 1 49.69 1.75
0 0 -1 57.41 1.77
-2 0 -1 12.5 0.4
-2 0 -1 12.84 0.4
2 0 1 13 0.4
-2 0 -1 13.69 0.43
2 0 1 12.53 0.4
2 0 1 11.83 0.43
2 0 1 12.8 0.4
-2 0 -1 12.88 0.4
-4 0 -1 573.61 18.75
4 0 1 610.33 18.86
-4 0 -1 664.72 18.56
-4 0 -1 597.92 18.59
4 0 1 598.34 18.58
-6 0 -1 18.42 0.55
-6 0 -1 17.34 0.54
-6 0 -1 16.94 0.53
6 0 1 16.66 0.56
6 0 1 17.16 0.56
-6 0 -1 15.18 0.63
-6 0 -1 16.83 0.55
6 0 1 16.81 0.53
6 0 1 17.22 0.65
8 0 1 4.52 0.21
-8 0 -1 4.64 0.2
-8 0 -1 4.63 0.18
-8 0 -1 4.52 0.19
-8 0 -1 4.15 0.33
8 0 1 4.55 0.17
-8 0 -1 4.74 0.21
-8 0 -1 4.42 0.21
-10 0 -1 224.41 7.04
-10 0 -1 225.46 7.04
10 0 1 231.61 7.08
-10 0 -1 239.61 7.04
-10 0 -1 226.84 7.03
-12 0 -1 38.24 1.16
-12 0 -1 35.39 1.14
-12 0 -1 35.23 1.14
-12 0 -1 34.49 1.15
-14 0 -1 15.15 0.53
-14 0 -1 13.96 0.55
-14 0 -1 14.74 0.53
-14 0 -1 14.68 0.54
-16 0 -1 16.99 0.61
-16 0 -1 17.22 0.64
-16 0 -1 16.89 0.62
-18 0 -1 11.94 0.54
-18 0 -1 11.69 0.5
-20 0 -1 46.42 1.54
-20 0 -1 47.23 1.53
-22 0 -1 1.94 0.32
-22 0 -1 1.86 0.26
-24 0 -1 1.57 0.29
-24 0 -1 1.16 0.31
-26 0 -1 -0.12 0.28
-26 0 -1 0.18 0.36
-28 0 -1 1.74 0.39
-28 0 -1 2.21 0.37
-30 0 -1 1.2 0.44
-30 0 -1 1.16 0.36
-29 -1 1 2.92 0.4
-29 -1 1 3.9 0.44
-29 1 1 3.48 0.4
-29 1 1 3.57 0.41
-27 -1 1 2.93 0.36
-27 -1 1 2.59 0.36
-27 1 1 4.29 0.39
-27 1 1 4.3 0.39
-25 -1 1 15.19 0.7
-25 -1 1 15.85 0.72
-25 1 1 18.55 0.78
-25 1 1 16.95 0.75
-23 -1 1 13.58 0.63
-23 -1 1 14.61 0.65
-23 1 1 12.93 0.61
-23 1 1 13.69 0.62
-21 -1 1 14.21 0.62
-21 -1 1 13.9 0.61
-21 1 1 11.69 0.56
-21 1 1 11.59 0.52
-19 -1 1 14.42 0.58
-19 -1 1 13.25 0.58
19 1 -1 13.69 0.58
-19 1 1 13.81 0.55
-19 1 1 13.2 0.55
-17 -1 1 5.21 0.31
-17 -1 1 5.06 0.33
-17 1 1 6.64 0.35
-17 1 1 6.87 0.35
17 1 -1 6.89 0.38
-15 -1 1 1.16 0.17
-15 -1 1 1.16 0.16
15 -1 -1 1.27 0.13
15 1 -1 1 0.18
-15 1 1 0.76 0.15
-15 1 1 0.89 0.15
13 -1 -1 18.21 0.57
-13 -1 1 16.52 0.59
13 -1 -1 16.44 0.6
-13 -1 1 17.01 0.59
-13 1 1 16.44 0.57
13 1 -1 16.76 0.6
-13 1 1 16.07 0.57
-11 -1 1 2.54 0.19
11 -1 -1 2.81 0.16
-11 -1 1 2.94 0.19
11 -1 -1 2.8 0.19
-11 1 1 1.97 0.15
11 1 -1 1.77 0.17
11 1 -1 1.51 0.12
-11 1 1 1.62 0.13
-9 -1 1 65.34 2.04
9 -1 -1 64.96 2.05
-9 -1 1 65.88 2.06
9 -1 -1 69.61 2.03
-9 -1 1 63.48 2.03
9 -1 -1 66.4 2.04
9 1 -1 51.92 1.63
-9 1 1 53.2 1.62
-9 1 1 51.27 1.65
9 1 -1 55.03 1.62
9 1 -1 50.54 1.65
-9 1 1 52.33 1.62
-7 -1 1 76.35 2.31
7 -1 -1 78.21 2.31
-7 -1 1 74.94 2.31
7 -1 -1 73.49 2.32
-7 -1 1 73.47 2.41
-7 -1 1 74.57 2.33
7 -1 -1 76.08 2.3
-7 1 1 94.4 2.72
-7 1 1 87.85 2.72
-7 1 1 86.36 2.74
7 1 -1 85.87 2.72
7 1 -1 86.77 2.74
7 1 -1 91.93 2.72
-5 -1 1 291.44 9.44
5 -1 -1 284.26 9.21
-5 -1 1 306.6 9.23
5 -1 -1 302.55 9.17
-5 -1 1 300.09 9.19
5 -1 -1 314.45 9.19
5 1 -1 345.94 10.12
5 1 -1 325.83 10.08
5 1 -1 326.61 10.19
-5 1 1 320.99 10.09
-5 1 1 328.43 10.1
-5 1 1 331.95 10.14
-3 -1 1 337.38 10.3
3 -1 -1 324.81 10.29
-3 -1 1 341.38 10.44
3 -1 -1 339.94 10.21
-3 -1 1 332.98 10.23
-3 -1 1 333.34 10.22
3 1 -1 352.76 11.08
3 1 -1 358.18 11
-3 1 1 364.72 11
3 1 -1 371.91 10.99
-3 1 1 355.09 11.04
1 -1 -1 311.56 9.12
-1 -1 1 293.31 9.11
-1 -1 1 299.22 9.17
-1 -1 1 291.3 9.15
1 1 -1 273.14 8.23
-1 1 1 270.86 8.26
1 1 -1 264.86 8.27
-1 -1 -1 94.18 2.8
-1 -1 -1 91.26 2.8
1 -1 1 85.11 2.78
1 -1 1 87.61 2.76
1 -1 1 88.38 2.76
1 -1 1 91.79 2.78
1 -1 1 89.32 2.77
-1 -1 -1 92.07 2.77
-1 1 -1 107.15 3.27
-1 1 -1 104.16 3.26
1 1 1 108.42 3.25
-1 1 -1 104.69 3.26
-1 1 -1 98.93 3.27
1 1 1 106.2 3.28
1 1 1 111.89 3.33
-1 1 -1 103.78 3.26
-1 1 -1 109.24 3.27
1 1 1 110.23 3.3
-3 1 -1 932.73 28.53
-5 -1 -1 189.01 5.94
-5 -1 -1 199.68 5.95
-5 -1 -1 192.14 5.97
-5 -1 -1 190.44 5.98
-5 -1 -1 204.07 6.03
5 -1 1 193.71 5.98
5 -1 1 190.97 5.97
-5 -1 -1 197.33 5.95
5 -1 1 192.37 5.98
-5 1 -1 167.96 5.2
5 1 1 170.15 5.2
5 1 1 178.46 5.26
-5 1 -1 174.62 5.22
-5 1 -1 170.73 5.2
5 1 1 168.95 5.22
5 1 1 160.4 5.24
-5 1 -1 165.6 5.22
-5 1 -1 172.08 5.23
-7 -1 -1 87.25 2.95
7 -1 1 94.71 2.88
-7 -1 -1 97.68 2.85
-7 -1 -1 93.67 2.86
-7 -1 -1 89.57 2.87
-7 -1 -1 94.69 2.86
-7 -1 -1 97.23 2.87
-7 1 -1 89.78 2.81
-7 1 -1 92.34 2.81
-7 1 -1 96.39 2.82
-7 1 -1 90.29 2.83
7 1 1 91.63 2.83
7 1 1 91.72 2.84
-7 1 -1 90.84 2.91
7 1 1 94.08 2.83
-9 -1 -1 0.92 0.1
-9 -1 -1 1.3 0.11
9 1 1 1.52 0.13
-9 1 -1 1.83 0.14
-9 1 -1 2.13 0.15
-9 1 -1 1.28 0.11
-9 1 -1 1.31 0.25
-9 1 -1 1.47 0.13
-11 -1 -1 39.91 1.25
-11 -1 -1 41.51 1.27
-11 -1 -1 38.13 1.26
-11 -1 -1 39.31 1.25
-11 1 -1 35.9 1.16
-11 1 -1 37.31 1.16
11 1 1 36.24 1.16
-11 1 -1 38.35 1.18
-13 -1 -1 26.86 0.92
-13 -1 -1 28.48 0.91
-13 -1 -1 28.38 0.93
-13 -1 -1 28.03 0.91
-13 1 -1 27.35 0.88
-13 1 -1 25.97 0.89
13 1 1 27.08 0.87
-13 1 -1 27.37 0.87
-13 1 -1 26.11 0.87
-15 -1 -1 13.26 0.49
-15 -1 -1 13.22 0.51
-15 -1 -1 13.41 0.53
-15 1 -1 11.64 0.47
15 1 1 11.61 0.43
-15 1 -1 11.56 0.43
-15 1 -1 11.06 0.44
-15 1 -1 10.23 0.44
-17 -1 -1 11.67 0.5
-17 -1 -1 12.06 0.5
-17 1 -1 12.57 0.55
-17 1 -1 13.05 0.51
-19 -1 -1 6.76 0.44
-19 -1 -1 7.04 0.42
-19 1 -1 5.02 0.36
-19 1 -1 5.63 0.41
-21 -1 -1 2.33 0.29
-21 -1 -1 2.04 0.26
-21 1 -1 1.43 0.24
-21 1 -1 2.05 0.3
-23 -1 -1 3.74 0.37
-23 -1 -1 3.62 0.33
-23 1 -1 3.52 0.32
-23 1 -1 4.66 0.39
-25 -1 -1 0.15 0.29
-25 -1 -1 -0.04 0.33
-25 1 -1 -0.02 0.3
-25 1 -1 0.36 0.27
-27 -1 -1 2.27 0.35
-27 -1 -1 1.59 0.37
-27 1 -1 1.1 0.39
-27 1 -1 1.21 0.32
-29 -1 -1 4.35 0.44
-29 -1 -1 4.04 0.48
-29 1 -1 4.93 0.43
-29 1 -1 4.5 0.48
-30 -2 1 1.71 0.39
-30 -2 1 1.54 0.42
-30 2 1 2.13 0.37
-30 2 1 2.2 0.38
-28 -2 1 0.91 0.34
-28 -2 1 0.8 0.35
-28 2 1 0.9 0.32
-28 2 1 0.81 0.32
-26 -2 1 5.65 0.43
-26 -2 1 6.87 0.55
-26 2 1 8.26 0.55
-26 2 1 6.51 0.53
-24 -2 1 16.98 0.74
-24 -2 1 17.85 0.75
-24 2 1 19.29 0.77
-24 2 1 17.9 0.74
-22 -2 1 12.2 0.6
-22 -2 1 13.08 0.6
22 2 -1 11.04 0.56
-22 2 1 11.1 0.54
-22 2 1 11.38 0.56
-20 -2 1 2.76 0.29
-20 -2 1 2.35 0.26
-20 2 1 1.17 0.21
20 2 -1 1.18 0.25
-20 2 1 1.29 0.23
-18 -2 1 3.61 0.31
-18 -2 1 3.83 0.28
-18 2 1 2.41 0.22
-18 2 1 2.5 0.25
18 2 -1 2.39 0.26
-16 -2 1 3.28 0.26
16 -2 -1 2.79 0.2
-16 -2 1 2.45 0.22
-16 2 1 3.51 0.26
-16 2 1 3.33 0.28
16 2 -1 3.85 0.31
-14 -2 1 8.4 0.37
-14 -2 1 8.34 0.36
14 -2 -1 8.12 0.32
14 2 -1 4.51 0.3
-14 2 1 4.26 0.24
-14 2 1 3.99 0.24
-12 -2 1 59.3 1.9
12 -2 -1 62.83 1.88
-12 -2 1 59.9 1.89
12 2 -1 64.59 2.08
-12 2 1 66.59 2.05
-12 2 1 66.73 2.05
-10 -2 1 10.79 0.39
-10 -2 1 10.32 0.42
-10 -2 1 10.98 0.39
10 -2 -1 10.86 0.37
-10 2 1 11.93 0.42
10 2 -1 12.15 0.47
10 2 -1 12.42 0.42
-10 2 1 12.22 0.45
-10 2 1 11.99 0.42
8 -2 -1 112.42 3.29
-8 -2 1 110.75 3.32
-8 -2 1 109.31 3.3
-8 -2 1 98.34 3.4
8 -2 -1 110.39 3.3
-8 -2 1 105.22 3.3
8 2 -1 91.35 2.93
-8 2 1 95.93 2.9
8 2 -1 98.13 2.91
8 2 -1 96.6 2.91
-8 2 1 94.4 2.91
-8 2 1 93.53 2.92
6 -2 -1 137.04 4.19
6 -2 -1 140.66 4.2
-6 -2 1 138.53 4.18
-6 -2 1 138.32 4.19
-6 -2 1 135.51 4.24
-6 -2 1 128.72 4.24
-6 2 1 134.7 4.29
6 2 -1 132.58 4.33
-6 2 1 139.47 4.31
6 2 -1 145.63 4.35
6 2 -1 141.02 4.29
-6 2 1 139.61 4.31
6 2 -1 142.62 4.29
4 -2 -1 41.57 1.25
-4 -2 1 40.51 1.28
-4 -2 1 40.98 1.26
-4 -2 1 38.6 1.33
-4 -2 1 42.25 1.26
4 -2 -1 40.71 1.25
4 2 -1 53.14 1.66
-4 2 1 48.72 1.59
4 2 -1 52.54 1.58
-4 2 1 50.02 1.57
4 2 -1 51.39 1.58
4 2 -1 52.18 1.6
-4 2 1 52.4 1.59
-2 -2 1 32.2 1.01
2 -2 -1 32.32 0.99
-2 -2 1 29.67 1.02
2 -2 -1 32.64 0.98
-2 -2 1 32.1 0.99
-2 -2 1 32.89 0.99
2 -2 -1 33.98 0.99
-2 2 1 22.15 0.67
2 2 -1 19.81 0.71
2 2 -1 22.42 0.68
2 2 -1 22.07 0.68
-2 2 1 21.92 0.67
-2 2 1 21.68 0.67
2 2 -1 22.83 0.7
0 -2 -1 10.38 0.34
0 -2 -1 10.34 0.35
0 -2 1 10.72 0.34
0 -2 1 11.08 0.35
0 -2 1 10.7 0.33
0 -2 -1 10.77 0.34
0 -2 1 10.85 0.33
0 2 1 5.27 0.18
0 2 -1 5.44 0.17
0 2 1 5 0.19
0 2 -1 5.45 0.18
0 2 1 4.93 0.18
0 2 -1 5.85 0.19
0 2 -1 5.61 0.17
-2 -2 -1 26.93 0.89
-2 -2 -1 29.63 0.89
2 -2 1 29.58 0.88
2 -2 1 27.45 0.89
-2 -2 -1 28.38 0.88
-2 -2 -1 30.7 0.91
2 -2 1 28.99 0.89
2 2 1 21.32 0.67
2 2 1 20.87 0.67
-2 2 -1 21.75 0.66
-2 2 -1 21.46 0.66
-2 2 -1 22.3 0.66
2 2 1 20.48 0.65
-2 2 -1 21.96 0.66
2 2 1 22.15 0.7
-2 2 -1 21.2 0.66
2 2 1 21.01 0.67
-4 -2 -1 865.64 27.28
-4 -2 -1 926.8 27.54
-4 2 -1 827.57 25.16
4 2 1 794.63 25.51
4 2 1 859.08 25.2
-6 -2 -1 176.61 5.45
-6 -2 -1 180.87 5.42
-6 -2 -1 172.24 5.43
-6 -2 -1 181.89 5.44
-6 -2 -1 171.01 5.41
6 2 1 181.11 5.46
-6 2 -1 176.84 5.47
-6 2 -1 175.97 5.44
6 2 1 159.1 5.48
-6 2 -1 188.2 5.47
-6 2 -1 184.79 5.48
6 2 1 176.37 5.44
6 2 1 176.13 5.51
-8 -2 -1 116.37 3.7
-8 -2 -1 122.56 3.7
8 -2 1 123.99 3.71
-8 -2 -1 117.9 3.8
-8 -2 -1 121.19 3.69
-8 -2 -1 123.97 3.71
8 2 1 115.89 3.47
8 2 1 108.42 3.59
-8 2 -1 112.49 3.49
-8 2 -1 117.72 3.46
-8 2 -1 115.06 3.46
-8 2 -1 110.56 3.47
8 2 1 113.54 3.49
-8 2 -1 112.64 3.56
8 2 1 112.9 3.46
-10 -2 -1 11.36 0.41
-10 -2 -1 11.26 0.43
-10 -2 -1 11.61 0.43
-10 -2 -1 11.49 0.41
10 2 1 7.78 0.3
10 2 1 7.87 0.53
-10 2 -1 8.26 0.31
-10 2 -1 7.68 0.33
-10 2 -1 7.79 0.29
-10 2 -1 6.67 0.29
-12 -2 -1 40.34 1.34
-12 -2 -1 41.82 1.33
-12 -2 -1 43.48 1.34
-12 -2 -1 42.92 1.35
-12 2 -1 39.22 1.26
12 2 1 41.77 1.49
-12 2 -1 40.46 1.25
-12 2 -1 38.84 1.27
12 2 1 39.35 1.25
-12 2 -1 39.03 1.26
-14 -2 -1 14.49 0.54
-14 -2 -1 13.95 0.52
-14 -2 -1 14.32 0.53
14 2 1 12.65 0.45
-14 2 -1 12.61 0.46
-14 2 -1 12.4 0.48
-14 2 -1 12.21 0.46
-14 2 -1 12.38 0.47
-16 -2 -1 0.97 0.19
-16 -2 -1 1 0.22
-16 -2 -1 1.19 0.21
16 2 1 0.52 0.14
-16 2 -1 0.42 0.15
-16 2 -1 0.59 0.15
-16 2 -1 0.5 0.19
-18 -2 -1 37.73 1.25
-18 -2 -1 37.24 1.26
-18 2 -1 33.71 1.12
-18 2 -1 33.92 1.18
18 2 1 33.47 1.1
-18 2 -1 33.81 1.15
-20 -2 -1 2.58 0.28
-20 -2 -1 3 0.27
-20 2 -1 4.73 0.36
-20 2 -1 5.66 0.44
-22 -2 -1 9.69 0.53
-22 -2 -1 9.99 0.53
-22 2 -1 10.07 0.5
-22 2 -1 10.19 0.57
-24 -2 -1 0.32 0.29
-24 -2 -1 0.28 0.28
-24 2 -1 1.14 0.34
-24 2 -1 1.22 0.27
-26 -2 -1 2.4 0.37
-26 -2 -1 2.54 0.36
-26 2 -1 1.5 0.37
-26 2 -1 1.97 0.31
-28 -2 -1 6.6 0.52
-28 -2 -1 6.22 0.48
-28 2 -1 8.18 0.61
-28 2 -1 7.81 0.59
-30 -2 -1 0.04 0.43
-30 -2 -1 0.32 0.36
-30 2 -1 0.37 0.42
-29 -3 1 1.03 0.4
-29 -3 1 0.59 0.36
-29 3 1 0.94 0.35
-29 3 1 0.22 0.31
-27 -3 1 0.28 0.32
-27 -3 1 0.86 0.35
-27 3 1 1.18 0.33
-27 3 1 1.14 0.3
-25 -3 1 6.61 0.48
-25 -3 1 5.85 0.43
-25 3 1 6.45 0.49
-25 3 1 6.8 0.51
-23 -3 1 10.81 0.57
-23 -3 1 9.97 0.57
23 3 -1 7.69 0.5
-23 3 1 9.35 0.52
-23 3 1 8.31 0.48
-21 -3 1 2.14 0.29
-21 -3 1 1.99 0.28
-21 3 1 0.58 0.21
-21 3 1 0.95 0.25
21 3 -1 1.02 0.26
-19 -3 1 1.53 0.24
-19 -3 1 1.64 0.23
-19 3 1 0.8 0.19
19 3 -1 0.17 0.22
-19 3 1 0.49 0.21
-17 -3 1 0.75 0.19
-17 -3 1 0.83 0.2
-17 3 1 1.4 0.19
17 3 -1 1.73 0.24
-17 3 1 1.74 0.19
-15 -3 1 12.89 0.52
-15 -3 1 13.52 0.51
15 -3 -1 13.91 0.47
-15 3 1 10.14 0.41
15 3 -1 9.47 0.45
-15 3 1 9.81 0.39
-13 -3 1 28.81 0.95
13 -3 -1 29.13 0.92
-13 -3 1 29.05 0.95
-13 3 1 25.26 0.79
-13 3 1 23.6 0.8
13 3 -1 24.03 0.84
-11 -3 1 23.16 0.74
-11 -3 1 21.06 0.74
11 -3 -1 23.06 0.72
-11 3 1 20.15 0.65
-11 3 1 19.98 0.66
11 3 -1 19.62 0.7
9 -3 -1 84.95 2.45
-9 -3 1 77.7 2.49
-9 -3 1 77.82 2.46
-9 -3 1 80.29 2.47
9 -3 -1 79.63 2.47
-9 3 1 72.56 2.3
-9 3 1 74.36 2.28
-9 3 1 75.77 2.28
9 3 -1 73.94 2.44
9 3 -1 74.46 2.29
9 3 -1 74.1 2.32
-7 -3 1 97.59 2.97
-7 -3 1 90.86 3.06
7 -3 -1 96.51 2.96
-7 -3 1 97.28 2.99
-7 -3 1 98.86 3
7 -3 -1 99.7 2.98
-7 3 1 85.46 2.59
-7 3 1 84.02 2.61
7 3 -1 88.31 2.6
7 3 -1 84.73 2.63
-7 3 1 83.31 2.6
7 3 -1 85.49 2.6
7 3 -1 82.87 2.72
-5 -3 1 437.39 13.66
-5 -3 1 440.09 13.5
5 -3 -1 430.12 13.45
5 -3 -1 446.17 13.44
-5 -3 1 461.12 13.61
-5 -3 1 433.08 13.49
5 3 -1 424.02 13.27
5 3 -1 402.26 13.47
-5 3 1 437.92 13.13
-5 3 1 415.75 13.19
-5 3 1 445.43 13.14
5 3 -1 455.61 13.19
5 3 -1 434.95 13.19
-3 -3 1 768.19 24.28
-3 -3 1 812.91 24.18
3 3 -1 828.15 25.29
1 -3 -1 220.18 6.87
1 -3 -1 216.92 6.9
-1 -3 1 221.86 6.9
-1 -3 1 217.82 6.89
-1 -3 1 235.7 6.97
1 -3 -1 229.64 6.9
-1 -3 1 236.24 6.95
-1 3 1 209.17 6.6
1 3 -1 218.07 6.5
-1 3 1 204.22 6.5
-1 3 1 212.86 6.55
1 3 -1 214.07 6.55
1 3 -1 215.73 6.59
1 3 -1 214.96 6.51
1 -3 1 17.16 0.54
-1 -3 -1 17.93 0.57
1 -3 1 16.98 0.55
1 -3 1 17.74 0.54
-1 -3 -1 17.01 0.54
1 -3 1 17.37 0.53
-1 -3 -1 17.2 0.54
-1 -3 -1 17.71 0.55
-1 3 -1 26.88 0.81
1 3 1 24.76 0.81
-1 3 -1 26.04 0.8
-1 3 -1 27.25 0.82
1 3 1 26.03 0.81
1 3 1 26.08 0.83
-1 3 -1 26.36 0.81
-1 3 -1 26.18 0.81
1 3 1 27.24 0.81
3 -3 1 138.08 4.81
3 -3 1 145.71 4.84
-3 -3 -1 155.57 4.84
-3 -3 -1 157.49 4.81
-3 -3 -1 180.82 4.89
-3 -3 -1 168.82 4.87
-3 3 -1 159.66 5.1
3 3 1 178.37 5.16
-3 3 -1 149.39 5.12
3 3 1 167.19 5.09
3 3 1 161.52 5.1
-3 3 -1 160.08 5.14
3 3 1 172.96 5.13
3 3 1 187.03 5.29
-5 -3 -1 82.14 2.44
-5 -3 -1 77.93 2.43
-5 -3 -1 77.03 2.44
-5 -3 -1 80.05 2.44
-5 -3 -1 82.94 2.5
5 -3 1 78.58 2.43
-5 -3 -1 77.92 2.43
5 3 1 76.14 2.38
-5 3 -1 76.58 2.38
-5 3 -1 79.42 2.37
5 3 1 79.65 2.37
-5 3 -1 77.5 2.36
5 3 1 72.9 2.45
-5 3 -1 77.83 2.37
5 3 1 78.98 2.39
-7 -3 -1 192.44 5.82
7 -3 1 184.72 5.77
-7 -3 -1 189.38 5.77
-7 -3 -1 190.39 5.74
-7 -3 -1 183.17 5.73
-7 -3 -1 188.68 5.78
-7 3 -1 184.42 5.64
-7 3 -1 190.42 5.67
7 3 1 179.42 5.62
7 3 1 171.65 5.71
7 3 1 189.34 5.61
7 3 1 185.29 5.69
-7 3 -1 183.07 5.65
-7 3 -1 188.81 5.66
-9 -3 -1 247.3 7.68
-9 -3 -1 264.16 7.71
-9 -3 -1 242.82 7.71
-9 -3 -1 246.09 7.69
-9 3 -1 223.31 6.93
9 3 1 208.18 7.04
-9 3 -1 236.35 6.99
-9 3 -1 226.29 6.91
-9 3 -1 244.57 7.03
-9 3 -1 219.64 6.91
9 3 1 229.48 6.95
-11 -3 -1 76.86 2.36
-11 -3 -1 79.14 2.37
-11 -3 -1 75.48 2.38
-11 -3 -1 74.39 2.37
-11 3 -1 59.05 1.91
-11 3 -1 61.79 1.89
11 3 1 61.09 2.1
11 3 1 61.82 1.9
-11 3 -1 61.96 1.89
-11 3 -1 61 1.9
-13 -3 -1 23.27 0.78
-13 -3 -1 23.13 0.79
-13 -3 -1 23.24 0.78
13 3 1 18.69 0.64
-13 3 -1 18.16 0.65
13 3 1 19.05 0.9
-13 3 -1 18.66 0.63
-13 3 -1 19.13 0.62
-13 3 -1 18.6 0.64
-15 -3 -1 13.17 0.51
-15 -3 -1 12.76 0.49
-15 -3 -1 13.41 0.51
15 3 1 16.98 0.6
-15 3 -1 16.13 0.59
-15 3 -1 17.22 0.64
15 3 1 18.96 0.94
-15 3 -1 16.77 0.61
-15 3 -1 17.53 0.61
-17 -3 -1 1.81 0.22
-17 -3 -1 2.23 0.24
-17 3 -1 2.36 0.25
-17 3 -1 2.37 0.2
-17 3 -1 2.2 0.21
17 3 1 2.45 0.21
-19 -3 -1 10.89 0.5
-19 -3 -1 10.53 0.53
-19 3 -1 11.11 0.51
-19 3 -1 10.99 0.48
19 3 1 11.18 0.46
-21 -3 -1 10.22 0.54
-21 -3 -1 10.57 0.56
-21 3 -1 10.28 0.55
-21 3 -1 9.1 0.47
-23 -3 -1 2.39 0.32
-23 -3 -1 2.65 0.36
-23 3 -1 2.53 0.34
-23 3 -1 2.57 0.27
-25 -3 -1 1.27 0.33
-25 -3 -1 1.56 0.36
-25 3 -1 0.69 0.34
-25 3 -1 0.64 0.26
-27 -3 -1 10.2 0.69
-27 -3 -1 8.86 0.67
-27 3 -1 8.62 0.56
-27 3 -1 8.54 0.65
-29 -3 -1 2.01 0.44
-29 -3 -1 1.53 0.39
-29 3 -1 2.77 0.45
-30 -4 1 0.31 0.4
-30 -4 1 0.82 0.38
-30 4 1 0.75 0.36
-28 -4 1 2.9 0.4
-28 -4 1 2.88 0.39
-28 4 1 1.78 0.37
-28 4 1 1.57 0.32
-26 -4 1 0.27 0.3
-26 -4 1 -0.08 0.3
-26 4 1 0.01 0.26
-26 4 1 0.13 0.3
-24 -4 1 4.9 0.39
-24 -4 1 6.25 0.46
-24 4 1 4.61 0.37
-24 4 1 4.65 0.35
24 4 -1 4.33 0.39
-22 -4 1 14.74 0.65
-22 -4 1 13.44 0.64
-22 4 1 10.74 0.51
-22 4 1 11.03 0.54
22 4 -1 10.75 0.56
-20 -4 1 3.78 0.32
-20 -4 1 3.37 0.28
20 4 -1 3.72 0.33
-20 4 1 3.69 0.29
-20 4 1 4.08 0.33
-18 -4 1 10.35 0.46
-18 -4 1 10.28 0.49
-18 4 1 11.15 0.46
18 4 -1 10.74 0.53
-18 4 1 10.76 0.48
-16 -4 1 7.45 0.38
-16 -4 1 6.95 0.35
-16 4 1 4.11 0.29
-16 4 1 3.69 0.26
16 4 -1 4.07 0.34
-14 -4 1 57.58 1.81
14 -4 -1 56.98 1.76
-14 -4 1 56.58 1.79
-14 4 1 49.41 1.54
14 4 -1 47.11 1.58
-14 4 1 49.87 1.53
-12 -4 1 10.95 0.41
-12 -4 1 10.67 0.42
12 -4 -1 11.07 0.37
12 4 -1 11.15 0.67
-12 4 1 11.02 0.4
12 4 -1 10.32 0.47
-12 4 1 10.75 0.39
-10 -4 1 5.3 0.24
-10 -4 1 4.98 0.25
10 -4 -1 4.88 0.23
10 -4 -1 5.04 0.2
-10 4 1 2.34 0.17
10 4 -1 2.28 0.21
10 4 -1 2.45 0.33
-10 4 1 2.38 0.15
-10 4 1 2.53 0.17
8 -4 -1 56.23 1.64
-8 -4 1 52.48 1.66
-8 -4 1 52.46 1.66
-8 -4 1 51.38 1.77
-8 -4 1 53.29 1.69
8 -4 -1 54.52 1.66
-8 4 1 59.84 1.81
-8 4 1 57.53 1.82
8 4 -1 57.5 1.96
8 4 -1 60.16 1.82
-8 4 1 57.37 1.83
8 4 -1 59.03 1.86
-8 4 1 60.99 1.81
-6 -4 1 372.44 11.58
-6 -4 1 378.5 11.48
6 -4 -1 362.71 11.37
-6 -4 1 368.92 11.45
-6 -4 1 361.15 11.43
6 -4 -1 390.71 11.36
6 4 -1 289.53 10.27
6 4 -1 340.48 10.05
6 4 -1 312.08 10.09
-6 4 1 327.64 10.01
6 4 -1 345.11 10.04
-6 4 1 337.22 10.03
-6 4 1 339.53 10.04
-4 -4 1 389.01 11.54
-4 -4 1 373.92 11.56
4 -4 -1 375.58 11.39
-4 -4 1 375.83 11.47
4 -4 -1 364.65 11.41
-4 -4 1 379.94 11.48
4 -4 -1 361.05 11.42
4 4 -1 361.88 11.18
-4 4 1 368 11.08
-4 4 1 358.63 11.08
4 4 -1 383.9 11.12
4 4 -1 353.53 11.11
-4 4 1 373.38 11.08
4 4 -1 343.45 11.32
-2 -4 1 535.73 16.87
-2 -4 1 565.53 16.93
2 4 -1 502.78 14.89
2 4 -1 466.36 14.65
2 4 -1 479.68 14.79
2 4 -1 475.12 14.65
0 -4 1 4.87 0.18
0 -4 1 4.75 0.16
0 -4 -1 4.27 0.15
0 -4 1 5.72 0.19
0 -4 1 4.82 0.17
0 -4 -1 4.65 0.16
0 -4 1 4.61 0.18
0 -4 -1 4.49 0.2
0 -4 -1 4.71 0.17
0 4 1 8.75 0.34
0 4 -1 9.63 0.31
0 4 1 9.69 0.3
0 4 1 9.55 0.31
0 4 1 9.63 0.3
0 4 -1 9.73 0.33
0 4 -1 9.82 0.3
0 4 -1 10.87 0.33
0 4 1 8.86 0.31
2 -4 1 574.77 18.19
-2 -4 -1 625.71 18.42
2 -4 1 592.36 18.22
-2 -4 -1 596.94 18.23
2 4 1 577.47 18.26
2 4 1 587.52 18.29
-2 4 -1 594.67 18.28
-2 4 -1 602.46 18.27
2 4 1 634.42 18.49
-4 -4 -1 137.07 4.3
-4 -4 -1 137.85 4.24
-4 -4 -1 142.53 4.24
-4 -4 -1 151.36 4.29
-4 -4 -1 134.77 4.24
4 -4 1 130.57 4.29
4 4 1 140.75 4.21
-4 4 -1 133.39 4.17
-4 4 -1 127.81 4.14
4 4 1 138.49 4.18
-4 4 -1 127.24 4.16
4 4 1 137.51 4.19
4 4 1 140.74 4.2
4 4 1 139.96 4.19
-6 -4 -1 3.63 0.18
-6 -4 -1 3.74 0.18
6 -4 1 3.93 0.16
-6 -4 -1 4.12 0.18
-6 -4 -1 3.65 0.18
-6 -4 -1 3.53 0.16
-6 -4 -1 3.96 0.29
6 4 1 8.56 0.43
-6 4 -1 6.86 0.26
6 4 1 7.6 0.3
6 4 1 7.92 0.29
-6 4 -1 7.73 0.26
-6 4 -1 7.21 0.25
6 4 1 7.39 0.27
-6 4 -1 6.73 0.29
8 -4 1 240.87 7.33
-8 -4 -1 236.96 7.25
-8 -4 -1 235.48 7.3
-8 -4 -1 237.67 7.31
-8 -4 -1 238.96 7.31
-8 4 -1 236.53 7.08
8 4 1 235.53 7.08
8 4 1 216.89 7.15
-8 4 -1 232.87 7.15
8 4 1 231.48 7.04
-10 -4 -1 56.41 1.74
-10 -4 -1 55.78 1.75
-10 -4 -1 57.35 1.77
-10 -4 -1 54.67 1.75
-10 4 -1 44.71 1.38
10 4 1 46.04 1.4
10 4 1 39.02 1.56
-10 4 -1 44.71 1.38
-10 4 -1 44.93 1.37
-10 4 -1 46.14 1.41
-12 -4 -1 2.11 0.18
-12 -4 -1 3.01 0.2
-12 -4 -1 2.97 0.23
-12 4 -1 2.72 0.18
-12 4 -1 2.2 0.16
-12 4 -1 2.41 0.18
-12 4 -1 1.92 0.16
12 4 1 2.51 0.21
12 4 1 2.05 0.39
-14 -4 -1 12.98 0.5
-14 -4 -1 13.57 0.5
-14 -4 -1 11.78 0.47
-14 4 -1 14.9 0.54
14 4 1 15.99 0.85
-14 4 -1 15.75 0.54
-14 4 -1 14.79 0.57
-14 4 -1 15.78 0.53
14 4 1 14.46 0.55
-16 -4 -1 12.98 0.54
-16 -4 -1 13.27 0.52
-16 4 -1 11.55 0.48
16 4 1 14.06 0.87
-16 4 -1 12.19 0.47
-16 4 -1 12.81 0.53
16 4 1 12.84 0.49
-18 -4 -1 0.7 0.23
-18 -4 -1 0.64 0.23
18 4 1 0.95 0.18
-18 4 -1 1.12 0.24
-18 4 -1 0.81 0.17
-20 -4 -1 17.15 0.71
-20 -4 -1 18.38 0.71
-20 4 -1 14.91 0.64
20 4 1 13.8 0.56
-20 4 -1 13.96 0.56
-22 -4 -1 6.21 0.47
-22 -4 -1 6.5 0.52
-22 4 -1 6.29 0.4
-22 4 -1 6.26 0.5
-24 -4 -1 2.32 0.34
-24 -4 -1 2.47 0.34
-24 4 -1 1.06 0.25
-24 4 -1 1.4 0.31
-26 -4 -1 7.68 0.57
-26 -4 -1 7.82 0.63
-26 4 -1 4.43 0.36
-26 4 -1 4.16 0.42
-28 -4 -1 3.76 0.44
-28 -4 -1 4.24 0.44
-28 4 -1 3.97 0.45
-30 -4 -1 1.51 0.4
-30 -4 -1 0.95 0.4
-30 4 -1 1.5 0.42
-29 -5 1 2.56 0.43
-29 -5 1 2.07 0.4
-29 5 1 2.32 0.36
-27 -5 1 1.55 0.35
-27 -5 1 2.09 0.38
-27 5 1 1.15 0.34
-27 5 1 1.43 0.3
-25 -5 1 0.98 0.3
-25 -5 1 0.98 0.32
-25 5 1 0.57 0.3
-25 5 1 0.8 0.26
25 5 -1 0.27 0.29
-23 -5 1 8.16 0.53
-23 -5 1 7.33 0.51
-23 5 1 6.08 0.45
-23 5 1 5.14 0.41
23 5 -1 5.48 0.49
-21 -5 1 8.17 0.5
-21 -5 1 8.3 0.46
-21 5 1 6.22 0.39
-21 5 1 6.86 0.39
21 5 -1 6.56 0.46
-19 -5 1 4.28 0.34
-19 -5 1 4.46 0.33
19 5 -1 4.92 0.41
-19 5 1 4.4 0.36
-19 5 1 5.08 0.32
-17 -5 1 0.32 0.19
-17 -5 1 -0.19 0.19
-17 5 1 1.05 0.2
17 5 -1 0.38 0.23
-17 5 1 1.3 0.17
-15 -5 1 17.74 0.65
-15 -5 1 17.46 0.63
-15 5 1 12.55 0.46
-15 5 1 12.27 0.47
15 5 -1 12.63 0.55
-13 -5 1 60.08 1.89
13 5 -1 54.62 1.77
-13 5 1 55.97 1.7
-13 5 1 54.72 1.72
13 5 -1 53.49 1.96
-11 -5 1 64.8 2.03
11 -5 -1 67.54 1.99
-11 -5 1 62.39 2.02
11 5 -1 64.75 2.3
-11 5 1 69.75 2.08
-11 5 1 67.85 2.09
11 5 -1 67.83 2.14
-9 -5 1 46.21 1.46
-9 -5 1 45.26 1.46
9 -5 -1 47.81 1.43
9 -5 -1 46.98 1.46
-9 5 1 40.62 1.25
9 5 -1 36.5 1.42
-9 5 1 41.46 1.24
-9 5 1 41.78 1.25
9 5 -1 38.8 1.3
-7 -5 1 63.49 2
-7 -5 1 64.82 2.1
-7 -5 1 65.25 2.02
7 -5 -1 63.97 1.99
7 -5 -1 65.13 1.97
-7 -5 1 65.4 2
-7 5 1 56.82 1.76
7 5 -1 60.99 1.78
7 5 -1 56.59 1.81
-7 5 1 58.78 1.76
7 5 -1 50.06 1.89
7 5 -1 60.57 1.77
-7 5 1 57.04 1.76
-5 -5 1 47.79 1.51
-5 -5 1 52.15 1.59
5 -5 -1 46.58 1.5
-5 -5 1 52.69 1.54
-5 -5 1 48.91 1.51
5 -5 -1 49.66 1.49
5 -5 -1 45.32 1.5
5 5 -1 41.16 1.26
5 5 -1 43.68 1.31
-5 5 1 40.08 1.25
-5 5 1 40.59 1.25
5 5 -1 39.37 1.36
5 5 -1 40.77 1.27
-5 5 1 40.2 1.26
3 -5 -1 717.78 22.98
-3 -5 1 809.09 23.3
-3 -5 1 741.28 23.11
3 5 -1 709.49 21.73
3 5 -1 676.07 21.53
-3 5 1 696.25 21.39
3 5 -1 730.75 21.41
1 -5 -1 119.32 3.69
-1 -5 1 116.82 3.67
-1 -5 1 121.36 3.67
1 -5 -1 116.26 3.69
1 -5 -1 116.88 3.65
1 -5 -1 118.04 3.72
-1 -5 1 121.18 3.66
-1 -5 1 127.13 3.69
1 5 -1 136.12 4.1
1 5 -1 137.63 4.24
-1 5 1 128.46 4.08
-1 5 1 136.18 4.07
-1 5 1 132.63 4.13
-1 5 1 126.97 4.2
-1 5 1 132.52 4.09
1 5 -1 140.04 4.14
1 5 -1 134.09 4.12
1 -5 1 22.82 0.69
1 -5 1 23.93 0.7
-1 -5 -1 21.37 0.68
-1 -5 -1 21.15 0.67
1 -5 1 21.5 0.69
-1 -5 -1 22.22 0.69
-1 -5 -1 22.16 0.72
-1 -5 -1 20.69 0.67
-1 5 -1 30.78 0.96
-1 5 -1 32.88 0.96
1 5 1 29.74 0.95
1 5 1 31.14 0.96
1 5 1 29.49 0.99
1 5 1 30.3 0.96
-1 5 -1 31.94 0.94
1 5 1 30.89 0.94
-1 5 -1 30.24 0.97
-1 5 -1 31.56 0.97
3 -5 1 142.09 4.44
-3 -5 -1 151.41 4.44
3 -5 1 147.43 4.45
-3 -5 -1 149.49 4.44
-3 -5 -1 138.5 4.41
-3 -5 -1 140.29 4.42
-3 -5 -1 142.01 4.4
-3 5 -1 123.29 3.77
3 5 1 129.84 3.91
3 5 1 119.82 3.78
3 5 1 122.85 3.86
3 5 1 123.03 3.81
-3 5 -1 120.66 3.79
3 5 1 128.1 3.83
5 -5 1 74.1 2.39
5 -5 1 66.93 2.39
-5 -5 -1 84.96 2.4
-5 -5 -1 89.12 2.47
-5 -5 -1 74.43 2.39
-5 -5 -1 79.06 2.4
-5 -5 -1 76.09 2.4
-5 -5 -1 80.68 2.39
-5 5 -1 56.59 1.88
5 5 1 69.22 1.98
5 5 1 66.52 1.89
-5 5 -1 59.62 1.88
-5 5 -1 55.9 1.87
5 5 1 59.36 1.88
5 5 1 61.91 1.9
-7 -5 -1 46.01 1.46
-7 -5 -1 45.17 1.46
-7 -5 -1 47.77 1.47
-7 -5 -1 49.58 1.49
7 -5 1 44.48 1.45
-7 -5 -1 47.27 1.46
-7 -5 -1 48 1.56
7 5 1 55.64 1.67
-7 5 -1 55.17 1.66
7 5 1 56.21 1.69
-7 5 -1 53.13 1.67
-7 5 -1 47.15 1.66
7 5 1 50.7 1.78
-7 5 -1 53.3 1.63
7 5 1 55.73 1.66
-9 -5 -1 111.07 3.42
-9 -5 -1 113.31 3.42
-9 -5 -1 110.22 3.43
9 5 1 116.54 3.47
-9 5 -1 118.05 3.47
-9 5 -1 112.37 3.46
9 5 1 103.67 3.61
-11 -5 -1 12.85 0.48
-11 -5 -1 13.54 0.47
-11 -5 -1 12.63 0.47
-11 5 -1 16.95 0.56
-11 5 -1 17.47 0.54
11 5 1 14.29 0.8
-11 5 -1 17.14 0.59
-11 5 -1 16.87 0.56
11 5 1 16.73 0.59
-13 -5 -1 38.84 1.23
-13 -5 -1 37.94 1.22
-13 -5 -1 37.56 1.23
-13 5 -1 41.06 1.26
-13 5 -1 40.74 1.3
-13 5 -1 39.9 1.27
-13 5 -1 39.86 1.27
13 5 1 38 1.56
13 5 1 40.67 1.3
-15 -5 -1 4.21 0.33
-15 -5 -1 3.77 0.28
15 5 1 5.52 0.32
-15 5 -1 5.51 0.31
-15 5 -1 5.4 0.27
15 5 1 4.14 0.55
-15 5 -1 5.21 0.28
-17 -5 -1 8.39 0.42
-17 -5 -1 8.47 0.45
-17 5 -1 4.78 0.29
17 5 1 4.56 0.31
-17 5 -1 4.16 0.3
-17 5 -1 4.25 0.29
17 5 1 4.71 0.64
-19 -5 -1 12.81 0.6
-19 -5 -1 14.18 0.6
19 5 1 8.51 0.42
-19 5 -1 8.16 0.39
-19 5 -1 7.59 0.43
-21 -5 -1 13.89 0.64
-21 -5 -1 12.68 0.63
21 5 1 12.04 0.51
-21 5 -1 11.59 0.5
-21 5 -1 11.27 0.59
-23 -5 -1 4.34 0.38
-23 -5 -1 4.45 0.37
-23 5 -1 3.55 0.37
23 5 1 3.53 0.3
-23 5 -1 3.67 0.3
-25 -5 -1 3.71 0.41
-25 -5 -1 3.43 0.39
-25 5 -1 2.23 0.28
-25 5 -1 2.49 0.38
-27 -5 -1 1.97 0.39
-27 -5 -1 1.93 0.4
-27 5 -1 0.87 0.37
-29 -5 -1 1.97 0.41
-29 -5 -1 1.75 0.41
-29 5 -1 1.68 0.4
-30 -6 1 1.95 0.46
-30 -6 1 1.04 0.41
-30 6 1 1.29 0.37
-28 -6 1 2.97 0.42
-28 -6 1 3.75 0.45
-28 6 1 2.64 0.36
-26 -6 1 3.32 0.4
-26 -6 1 3.47 0.41
26 6 -1 1.64 0.35
-26 6 1 2.42 0.34
-26 6 1 1.81 0.29
-24 -6 1 3.35 0.34
-24 -6 1 2.84 0.34
24 6 -1 4.59 0.4
-24 6 1 4.1 0.32
-24 6 1 4.35 0.37
-22 -6 1 21.3 0.81
-22 -6 1 20.69 0.84
22 6 -1 16.56 0.72
-22 6 1 15.98 0.66
-22 6 1 16.88 0.65
-20 -6 1 7.5 0.48
-20 -6 1 7.26 0.43
-20 6 1 9.65 0.47
20 6 -1 9.52 0.53
-20 6 1 8.8 0.43
-18 -6 1 18.65 0.74
-18 -6 1 19.77 0.73
-18 6 1 23.07 0.82
18 6 -1 23.85 0.9
-18 6 1 23.84 0.8
-16 -6 1 12.6 0.54
-16 -6 1 13.05 0.52
16 6 -1 9.13 0.79
16 6 -1 10.08 0.51
-16 6 1 9.74 0.42
-16 6 1 9.97 0.4
-14 -6 1 2.17 0.21
-14 -6 1 2.42 0.2
-14 6 1 3.09 0.23
14 6 -1 3.3 0.3
-14 6 1 2.72 0.2
14 6 -1 2.74 0.45
-12 -6 1 30.7 1.01
-12 -6 1 30.63 1
12 6 -1 27.79 0.95
-12 6 1 27.57 0.86
-12 6 1 26.26 0.87
12 6 -1 25.76 1.13
-10 -6 1 89.82 2.82
10 -6 -1 90.69 2.81
-10 -6 1 93.07 2.81
10 6 -1 78.89 2.86
10 6 -1 86.4 2.72
-10 6 1 89.58 2.67
-10 6 1 91.65 2.66
-8 -6 1 114.75 3.59
-8 -6 1 116.24 3.58
8 -6 -1 120.04 3.58
8 6 -1 84.33 3.06
8 6 -1 96.52 2.97
-8 6 1 96.28 2.91
-8 6 1 100.13 2.91
-8 6 1 98.29 2.92
-6 -6 1 132.11 4.27
6 -6 -1 140.37 4.29
-6 -6 1 149.51 4.36
-6 -6 1 137.26 4.3
-6 -6 1 140.03 4.29
6 6 -1 140.21 4.39
-6 6 1 139.57 4.41
6 6 -1 145.6 4.35
6 6 -1 148.56 4.38
-6 6 1 140.02 4.35
-6 6 1 138.96 4.37
-6 6 1 145.97 4.35
-4 -6 1 10.04 0.38
-4 -6 1 8.84 0.32
4 -6 -1 8.94 0.29
4 -6 -1 8.37 0.3
-4 -6 1 9.2 0.32
-4 -6 1 9.47 0.35
-4 6 1 5.61 0.19
-4 6 1 4.72 0.19
-4 6 1 5.14 0.18
4 6 -1 5.5 0.26
4 6 -1 5.29 0.31
4 6 -1 5.47 0.2
4 6 -1 5.09 0.2
-4 6 1 4.75 0.19
-4 6 1 5.36 0.18
2 -6 -1 8.53 0.29
2 -6 -1 8.05 0.3
-2 -6 1 9.36 0.3
2 -6 -1 9.27 0.29
2 6 -1 9.69 0.31
-2 6 1 9.42 0.3
2 6 -1 9.48 0.31
-2 6 1 9.34 0.3
-2 6 1 8.7 0.31
-2 6 1 8.6 0.35
0 -6 1 1000 30.36
0 -6 -1 990.81 30.49
0 -6 -1 996.97 30.3
0 6 -1 915.03 28.05
0 6 -1 921.98 28.08
-2 -6 -1 13.05 0.4
-2 -6 -1 12.61 0.46
2 -6 1 12.95 0.42
-2 -6 -1 12.48 0.42
2 -6 1 12.61 0.4
-2 -6 -1 12.97 0.42
-2 -6 -1 12.58 0.39
-2 -6 -1 12.54 0.41
2 -6 1 12.42 0.42
2 6 1 13.32 0.42
-2 6 -1 13.17 0.45
2 6 1 13.36 0.44
-2 6 -1 13.3 0.44
-2 6 -1 13.76 0.43
-2 6 -1 12.97 0.46
-2 6 -1 13.45 0.41
2 6 1 14.6 0.45
2 6 1 12.75 0.49
-4 -6 -1 49 1.57
-4 -6 -1 53.09 1.59
-4 -6 -1 57.03 1.64
4 -6 1 50.06 1.57
-4 -6 -1 48.89 1.58
4 -6 1 47.78 1.57
-4 -6 -1 51.49 1.58
4 6 1 50.23 1.54
4 6 1 45.37 1.47
-4 6 -1 46.23 1.46
-4 6 -1 47.99 1.46
4 6 1 47.05 1.47
4 6 1 46.16 1.47
4 6 1 47.58 1.45
-6 -6 -1 20.04 0.67
-6 -6 -1 18.65 0.66
-6 -6 -1 21.03 0.67
6 -6 1 19.88 0.67
-6 -6 -1 19.84 0.67
6 -6 1 20.57 0.66
-6 -6 -1 21.21 0.67
-6 -6 -1 23.63 0.77
-6 6 -1 12.73 0.44
-6 6 -1 11.62 0.41
6 6 1 13.85 0.45
6 6 1 15.8 0.49
-6 6 -1 12.82 0.43
-8 -6 -1 38.91 1.28
-8 -6 -1 42.7 1.28
-8 -6 -1 41.03 1.28
8 -6 1 40.2 1.28
8 6 1 50.58 1.57
8 6 1 45.93 1.68
-8 6 -1 48.58 1.5
-8 6 -1 48.58 1.54
8 6 1 50.74 1.55
-10 -6 -1 10.64 0.38
-10 -6 -1 9.73 0.39
-10 -6 -1 9.92 0.4
-10 6 -1 5.05 0.21
10 6 1 3.88 0.43
-10 6 -1 5.68 0.26
-10 6 -1 5.39 0.2
10 6 1 5.53 0.3
-12 -6 -1 2.28 0.19
-12 -6 -1 2.28 0.21
-12 -6 -1 2.07 0.17
-12 6 -1 3.67 0.21
-12 6 -1 3.65 0.18
12 6 1 3.7 0.27
-12 6 -1 3.15 0.24
-12 6 -1 4.24 0.2
12 6 1 2.74 0.43
-14 -6 -1 17.45 0.64
-14 -6 -1 18.21 0.66
14 6 1 19.33 1.02
14 6 1 20.67 0.76
-14 6 -1 21.87 0.71
-14 6 -1 21.48 0.7
-14 6 -1 22.19 0.75
-16 -6 -1 6.24 0.38
-16 -6 -1 5.73 0.39
16 6 1 8.12 0.77
-16 6 -1 8.09 0.36
16 6 1 8.68 0.43
-16 6 -1 9.17 0.43
-16 6 -1 8.9 0.36
-18 -6 -1 10.02 0.52
-18 -6 -1 10.83 0.49
18 6 1 6.26 0.72
-18 6 -1 6.3 0.33
18 6 1 6.17 0.38
-18 6 -1 6.6 0.42
-20 -6 -1 13.28 0.64
-20 -6 -1 12.73 0.58
20 6 1 9.99 0.47
-20 6 -1 9.61 0.52
-20 6 -1 8.95 0.43
-22 -6 -1 6.27 0.49
-22 -6 -1 5.97 0.42
-22 6 -1 4.4 0.37
22 6 1 3.94 0.3
-22 6 -1 3.85 0.28
-24 -6 -1 0.93 0.34
-24 -6 -1 0.12 0.32
-24 6 -1 0.28 0.22
-24 6 -1 0.11 0.28
-26 -6 -1 1.32 0.34
-26 -6 -1 2.08 0.38
-26 6 -1 1.11 0.37
-28 -6 -1 3.64 0.45
-28 -6 -1 3.19 0.43
-28 6 -1 3.77 0.46
-29 -7 1 0.3 0.38
-29 -7 1 0.87 0.4
-29 7 1 1.14 0.35
-27 -7 1 3.29 0.4
-27 -7 1 3.7 0.44
27 7 -1 2.41 0.37
-27 7 1 2.33 0.37
-25 -7 1 3.94 0.39
-25 -7 1 4.22 0.42
25 7 -1 3.06 0.39
-25 7 1 2.66 0.3
-25 7 1 3.38 0.34
-23 -7 1 10.8 0.6
-23 -7 1 10.85 0.6
23 7 -1 10.52 0.62
-23 7 1 9.95 0.5
-23 7 1 10.43 0.55
-21 -7 1 12.04 0.6
-21 -7 1 11.82 0.59
21 7 -1 7.59 0.52
-21 7 1 8.22 0.46
-21 7 1 8.48 0.42
-19 -7 1 21.44 0.8
-19 -7 1 20.64 0.78
19 7 -1 24.5 0.92
-19 7 1 23.02 0.81
-19 7 1 23.16 0.83
-17 -7 1 6.53 0.37
-17 -7 1 6.59 0.42
-17 7 1 6.15 0.35
17 7 -1 6.03 0.45
-17 7 1 5.67 0.31
17 7 -1 5.85 0.68
-15 -7 1 5.49 0.32
-15 -7 1 6.32 0.36
-15 7 1 6.83 0.33
15 7 -1 6.69 0.69
-15 7 1 6.38 0.3
15 7 -1 6.36 0.45
-13 -7 1 9.85 0.43
-13 -7 1 10.02 0.42
-13 7 1 13.16 0.48
-13 7 1 13.95 0.47
13 7 -1 13.46 0.58
13 7 -1 12.6 0.83
-11 -7 1 40.42 1.29
-11 -7 1 40.63 1.3
11 7 -1 30.45 1.32
-11 7 1 35.65 1.1
11 7 -1 36.08 1.18
-11 7 1 35.75 1.09
-9 -7 1 164.63 5.1
-9 -7 1 169.08 5.1
9 7 -1 145.97 4.98
-9 7 1 169.92 4.82
-9 7 1 159.1 4.84
9 7 -1 155.07 4.86
-7 -7 1 232.05 6.95
-7 -7 1 218.16 6.96
7 -7 -1 225.34 6.93
-7 7 1 200.27 6.03
-7 7 1 195.45 5.99
7 7 -1 204.78 6.02
7 7 -1 183.08 6.1
-7 7 1 197.95 6.02
-5 -7 1 247.7 7.71
-5 -7 1 242.09 7.71
5 -7 -1 238.56 7.59
-5 -7 1 253.07 7.67
-5 -7 1 272.74 7.76
5 -7 -1 246.68 7.66
-5 7 1 220.07 6.57
-5 7 1 217.68 6.58
-5 7 1 220.55 6.6
-5 7 1 215.63 6.56
5 7 -1 215.2 6.57
-5 7 1 210.23 6.55
5 7 -1 221.47 6.58
5 7 -1 211.61 6.64
5 7 -1 198.67 6.61
3 -7 -1 145.84 4.57
-3 -7 1 148.73 4.61
3 -7 -1 150.62 4.58
-3 -7 1 158.68 4.61
3 -7 -1 148.83 4.61
-3 -7 1 143.81 4.62
-3 -7 1 151.68 4.58
-3 7 1 159.47 4.81
3 7 -1 152.01 4.82
-3 7 1 154.98 4.82
3 7 -1 159.4 4.81
-3 7 1 159.16 4.77
-3 7 1 155.14 4.76
3 7 -1 153.62 4.84
3 7 -1 159 4.81
-3 7 1 152.2 4.88
1 -7 -1 85.99 2.61
1 -7 -1 82.22 2.63
-1 -7 1 84.6 2.62
1 -7 -1 81.79 2.6
-1 -7 1 85.65 2.61
1 -7 -1 85.94 2.61
1 -7 -1 85.15 2.65
1 -7 -1 83.91 2.63
-1 -7 1 84.43 2.62
-1 -7 1 85.61 2.64
-1 -7 1 89.03 2.62
-1 -7 1 87.94 2.61
-1 -7 1 88.71 2.63
-1 7 1 90.73 2.85
-1 7 1 94.68 2.88
-1 7 1 93.53 2.85
1 7 -1 94.48 2.84
-1 7 1 92.99 2.89
1 7 -1 96.14 2.85
-1 7 1 89.71 2.84
1 7 -1 93.45 2.88
1 7 -1 94.58 2.87
-1 -7 -1 23.11 0.75
1 -7 1 22.02 0.71
1 -7 1 22.41 0.7
-1 -7 -1 22.3 0.7
-1 -7 -1 22.52 0.68
-1 -7 -1 21.89 0.7
-1 -7 -1 22.35 0.69
-1 -7 -1 22.23 0.7
1 -7 1 21.62 0.69
1 -7 1 21.63 0.73
1 7 1 32.26 1.03
-1 7 -1 29.76 1
-1 7 -1 32.21 0.98
1 7 1 29.88 0.98
-1 7 -1 32.02 0.96
1 7 1 31.3 0.96
1 7 1 31.03 0.98
-1 7 -1 30.86 1
-1 7 -1 32.89 0.98
1 7 1 32.07 0.96
3 -7 1 94.32 2.9
-3 -7 -1 91.43 2.89
-3 -7 -1 98.71 2.95
-3 -7 -1 93.38 2.89
-3 -7 -1 92.25 2.9
3 -7 1 94.81 2.89
-3 -7 -1 93.84 2.9
-3 -7 -1 98.41 2.9
3 7 1 95.47 2.89
3 7 1 95.49 2.87
-3 7 -1 94.57 2.88
-3 7 -1 91.27 2.9
3 7 1 95.72 2.94
3 7 1 94.03 2.88
3 7 1 91.83 2.89
5 -7 1 129.21 4.19
5 -7 1 133.9 4.19
-5 -7 -1 152.9 4.27
-5 -7 -1 141.87 4.2
-5 -7 -1 136.47 4.19
-5 -7 -1 133.26 4.18
-5 -7 -1 133.91 4.19
5 7 1 128.03 3.87
5 7 1 122.71 3.77
5 7 1 132.89 3.8
5 7 1 125.63 3.79
-5 7 -1 119.17 3.77
-5 7 -1 114.05 3.78
-7 -7 -1 5.93 0.26
-7 -7 -1 5.38 0.24
7 -7 1 4.89 0.23
7 -7 1 5.38 0.24
-7 -7 -1 5.54 0.24
7 7 1 8.6 0.29
-7 7 -1 6.39 0.23
-9 -7 -1 41.7 1.28
-9 -7 -1 39.6 1.28
-9 -7 -1 41.04 1.29
9 -7 1 39.92 1.28
-9 7 -1 48.24 1.47
9 7 1 42.97 1.63
9 7 1 45.58 1.5
9 7 1 49.1 1.48
-9 7 -1 45.87 1.43
-11 -7 -1 35.24 1.1
-11 -7 -1 33.88 1.1
-11 -7 -1 33.25 1.11
-11 7 -1 23.85 0.75
-11 7 -1 23.54 0.76
-11 7 -1 24.27 0.81
11 7 1 24.65 0.83
11 7 1 22.67 1.03
-13 -7 -1 34.24 1.15
-13 -7 -1 35.81 1.14
-13 7 -1 37.51 1.14
-13 7 -1 35.54 1.18
13 7 1 34.02 1.44
13 7 1 36.99 1.2
-13 7 -1 36.46 1.14
-15 -7 -1 0.48 0.18
-15 -7 -1 0.62 0.21
-15 7 -1 0.84 0.12
-15 7 -1 1.01 0.14
-15 7 -1 0.83 0.19
15 7 1 0.62 0.44
15 7 1 0.8 0.22
-17 -7 -1 7 0.43
-17 -7 -1 7 0.45
17 7 1 6.54 0.71
17 7 1 6.55 0.4
-17 7 -1 6.45 0.4
-17 7 -1 6.17 0.31
-17 7 -1 6.25 0.35
-19 -7 -1 8.48 0.5
-19 -7 -1 8.56 0.46
-19 7 -1 5.67 0.31
19 7 1 4.37 0.71
-19 7 -1 5.06 0.38
19 7 1 5.37 0.4
-21 -7 -1 0.97 0.29
-21 -7 -1 0.82 0.29
21 7 1 0.62 0.23
-21 7 -1 0.45 0.17
-21 7 -1 0.96 0.28
-23 -7 -1 1.28 0.34
-23 -7 -1 1.18 0.33
-23 7 -1 1.48 0.31
-23 7 -1 1.32 0.22
23 7 1 1.16 0.25
-25 -7 -1 0.37 0.31
-25 -7 -1 0.62 0.34
-25 7 -1 0.39 0.32
-27 -7 -1 4.37 0.47
-27 -7 -1 4.92 0.47
-27 7 -1 6.5 0.5
-29 -7 -1 3.48 0.47
-29 -7 -1 2.13 0.41
-29 7 -1 2.92 0.45
-28 -8 1 1.93 0.41
-28 -8 1 0.72 0.36
-28 8 1 0.85 0.34
-26 -8 1 2.31 0.4
-26 -8 1 2.11 0.36
26 8 -1 1.31 0.35
-26 8 1 1.9 0.34
-24 -8 1 1.93 0.35
-24 -8 1 1.45 0.34
24 8 -1 0.98 0.34
-24 8 1 0.86 0.24
-24 8 1 1.23 0.28
-22 -8 1 11.19 0.6
-22 -8 1 10.98 0.61
-22 8 1 10.19 0.53
-22 8 1 11.04 0.49
22 8 -1 9.96 0.63
-20 -8 1 4.59 0.36
-20 -8 1 4.69 0.34
-20 8 1 3.13 0.24
-20 8 1 3.01 0.28
20 8 -1 2.65 0.35
-18 -8 1 12.38 0.57
-18 -8 1 11.45 0.54
18 8 -1 14.61 1.01
-18 8 1 14.38 0.54
18 8 -1 14.07 0.67
-18 8 1 14.53 0.57
-16 -8 1 2.95 0.27
-16 -8 1 3.51 0.27
-16 8 1 5.84 0.28
16 8 -1 4.72 0.61
16 8 -1 4.43 0.4
-16 8 1 4.96 0.32
-14 -8 1 5.01 0.31
-14 -8 1 4.92 0.33
-14 8 1 5.75 0.29
14 8 -1 4.89 0.56
14 8 -1 5.4 0.38
-14 8 1 6.09 0.26
-12 -8 1 25.87 0.87
-12 -8 1 26.63 0.89
12 8 -1 26.85 0.97
-12 8 1 29.23 0.86
-12 8 1 26.79 0.87
12 8 -1 23.76 1.13
-10 -8 1 96.89 2.95
-10 -8 1 94.28 2.96
10 8 -1 85.94 2.71
10 8 -1 79.39 2.86
-10 8 1 88.86 2.65
-10 8 1 89.93 2.64
-8 -8 1 178.15 5.54
8 -8 -1 177.63 5.53
-8 -8 1 189.13 5.55
-8 8 1 179.59 5.33
8 8 -1 175.75 5.34
-8 8 1 178.96 5.32
8 8 -1 159.39 5.44
-6 -8 1 42.58 1.36
-6 -8 1 43.64 1.36
-6 -8 1 46.29 1.49
6 -8 -1 41.14 1.35
-6 8 1 30.87 0.92
-6 8 1 29.9 0.93
6 8 -1 27.76 1.08
6 8 -1 29.95 1
-6 8 1 30.32 0.93
-6 8 1 30.17 0.94
-6 8 1 29.35 0.94
-4 -8 1 146.37 4.49
4 -8 -1 137.35 4.4
-4 -8 1 141.22 4.43
-4 -8 1 151.76 4.44
-4 -8 1 155.52 4.47
4 -8 -1 140.74 4.44
-4 -8 1 139.98 4.45
-4 8 1 141.98 4.38
-4 8 1 139.62 4.33
-4 8 1 145.84 4.35
4 8 -1 138.66 4.41
4 8 -1 142.73 4.37
-4 8 1 139.62 4.36
4 8 -1 144.6 4.33
4 8 -1 144.11 4.33
2 -8 -1 190.32 5.8
-2 -8 1 193.32 5.74
2 -8 -1 198.64 5.76
2 -8 -1 186.44 5.76
-2 -8 1 181.15 5.74
-2 -8 1 184.11 5.76
2 -8 -1 185.2 5.74
-2 -8 1 184.47 5.75
-2 -8 1 193.42 5.87
2 -8 -1 183.9 5.76
-2 8 1 169 5.26
2 8 -1 172.16 5.24
-2 8 1 166.98 5.33
-2 8 1 174.61 5.21
2 8 -1 169.91 5.19
-2 8 1 174.62 5.28
2 8 -1 156.1 5.27
2 8 -1 179.07 5.26
-2 8 1 172.69 5.2
0 -8 -1 6.08 0.23
0 -8 1 6.52 0.25
0 -8 1 6.15 0.21
0 -8 -1 5.92 0.22
0 -8 1 6.48 0.21
0 -8 1 6.47 0.27
0 -8 -1 6.11 0.28
0 -8 1 6.2 0.23
0 -8 1 6.52 0.24
0 -8 -1 6.38 0.21
0 -8 -1 6.52 0.23
0 8 1 9.5 0.33
0 8 1 9.83 0.31
0 8 1 9.67 0.31
0 8 -1 9.69 0.36
0 8 1 9.39 0.32
0 8 -1 9.88 0.37
0 8 1 9.75 0.39
0 8 -1 9.45 0.31
-2 -8 -1 90.85 2.85
2 -8 1 92.77 2.85
2 -8 1 93.37 2.84
-2 -8 -1 93.31 2.84
-2 -8 -1 95.66 2.9
-2 -8 -1 94.72 2.87
2 -8 1 93.75 2.85
-2 -8 -1 93.32 2.85
-2 -8 -1 90.01 2.84
-2 8 -1 82.03 2.48
2 8 1 79.33 2.54
2 8 1 82.94 2.48
2 8 1 82.25 2.49
2 8 1 80.3 2.5
-2 8 -1 81.48 2.52
-2 8 -1 80.94 2.49
-2 8 -1 81.79 2.49
-2 8 -1 79.9 2.5
-4 -8 -1 70.18 2.08
4 -8 1 60.89 1.98
4 -8 1 61.64 1.98
-4 -8 -1 63.28 1.98
-4 -8 -1 69.67 2.01
-4 -8 -1 62.13 1.98
-4 -8 -1 62.29 1.97
4 8 1 65.22 2.01
-4 8 -1 62.17 2
4 8 1 62.49 2
4 8 1 64.69 1.98
4 8 1 66.98 2.07
-4 8 -1 66.45 1.99
4 8 1 64.31 2
-6 -8 -1 107.55 3.24
-6 -8 -1 103.83 3.23
6 -8 1 104.45 3.23
6 -8 1 106.04 3.24
6 8 1 92.78 2.97
6 8 1 93.05 2.87
6 8 1 93.1 2.88
6 8 1 92.9 2.85
-8 -8 -1 31.2 1
-8 -8 -1 31.8 0.99
8 -8 1 29.78 0.98
8 -8 1 30.07 0.98
-8 -8 -1 30.42 0.98
8 8 1 31.63 1.04
-8 8 -1 31.37 0.97
-8 8 -1 31.14 1.02
8 8 1 29.88 1.18
8 8 1 34.33 1.07
-10 -8 -1 60.22 1.85
10 -8 1 57.69 1.85
-10 -8 -1 59.43 1.86
10 8 1 46.38 1.45
-10 8 -1 46.81 1.44
10 8 1 41.23 1.62
-10 8 -1 45.26 1.39
-12 -8 -1 66.39 2.04
-12 -8 -1 63.74 2.05
-12 8 -1 56.02 1.72
-12 8 -1 56.25 1.72
12 8 1 51.6 1.99
12 8 1 57.42 1.79
-12 8 -1 57.15 1.77
-14 -8 -1 15.47 0.61
-14 -8 -1 15.53 0.59
-14 8 -1 16.98 0.55
-14 8 -1 16.34 0.56
14 8 1 14.02 0.91
14 8 1 16.6 0.64
-14 8 -1 17.39 0.62
-16 -8 -1 22.08 0.81
-16 -8 -1 24.27 0.85
-16 8 -1 22.32 0.8
-16 8 -1 23.01 0.73
16 8 1 21.66 0.82
-16 8 -1 21.75 0.73
16 8 1 19.57 1.15
-18 -8 -1 3.54 0.3
-18 -8 -1 3.17 0.3
18 8 1 4.63 0.68
18 8 1 5.16 0.4
-18 8 -1 5.61 0.4
-18 8 -1 5.2 0.29
-20 -8 -1 1.2 0.29
-20 -8 -1 1.41 0.3
-20 8 -1 0.75 0.25
-20 8 -1 0.9 0.17
20 8 1 0.6 0.6
20 8 1 1.42 0.25
-22 -8 -1 1.14 0.3
-22 -8 -1 0.98 0.31
22 8 1 1.3 0.26
-22 8 -1 0.85 0.22
-22 8 -1 0.82 0.29
-24 -8 -1 2.54 0.34
-24 -8 -1 2.54 0.37
-24 8 -1 1.37 0.34
-26 -8 -1 4.29 0.46
-26 -8 -1 4.51 0.45
-26 8 -1 3.75 0.4
-28 -8 -1 2.33 0.43
-28 -8 -1 1.99 0.42
-28 8 -1 1.87 0.42
-29 -9 1 0.42 0.39
-29 -9 1 0.55 0.41
-29 9 1 1.35 0.35
-27 -9 1 4.13 0.45
-27 -9 1 3.87 0.45
-27 9 1 3.92 0.39
27 9 -1 3.76 0.58
-25 -9 1 0.8 0.32
-25 -9 1 0.13 0.31
25 9 -1 0.73 0.35
-25 9 1 0.56 0.29
-23 -9 1 0.19 0.28
-23 -9 1 0.23 0.3
-23 9 1 0 0.24
-23 9 1 0.22 0.25
23 9 -1 0.3 0.32
-21 -9 1 16.32 0.71
-21 -9 1 15.91 0.72
21 9 -1 13.54 0.68
-21 9 1 12.86 0.54
-21 9 1 12.72 0.56
-19 -9 1 0.34 0.24
-19 -9 1 0.52 0.23
-19 9 1 0.43 0.2
-19 9 1 0.47 0.16
19 9 -1 0.59 0.31
19 9 -1 0.23 0.56
-17 -9 1 20.37 0.77
-17 -9 1 20 0.76
17 9 -1 20.16 1.14
-17 9 1 21.09 0.69
-17 9 1 20.41 0.72
17 9 -1 18.92 0.81
-15 -9 1 35.33 1.19
-15 -9 1 35.33 1.17
-15 9 1 30.36 0.95
15 9 -1 28.64 1.33
-15 9 1 29.17 0.98
15 9 -1 30.08 1.07
-13 -9 1 9.62 0.42
-13 -9 1 10.17 0.42
-13 9 1 11.76 0.4
-13 9 1 11.56 0.43
13 9 -1 11.22 0.56
13 9 -1 9.38 0.73
-11 -9 1 29.64 0.96
-11 -9 1 28.23 0.96
-11 9 1 29.12 0.91
11 9 -1 25.3 1.16
-11 9 1 28.57 0.88
11 9 -1 28.66 1
-9 -9 1 16.42 0.58
-9 -9 1 16.96 0.58
9 -9 -1 16.14 0.55
-9 9 1 19.49 0.61
-9 9 1 19.12 0.59
9 9 -1 16.15 0.83
9 9 -1 18.95 0.7
-7 -9 1 19.5 0.69
-7 -9 1 21.22 0.68
7 -9 -1 21.02 0.67
-7 9 1 14.89 0.48
7 9 -1 14.41 0.58
7 9 -1 14.03 0.72
-7 9 1 15.08 0.49
-7 9 1 14.85 0.47
5 -9 -1 212.73 6.49
-5 -9 1 203.56 6.53
-5 -9 1 205.39 6.43
-5 -9 1 223.02 6.54
-5 9 1 215.32 6.68
-5 9 1 220.67 6.67
-5 9 1 217.48 6.72
5 9 -1 213.28 6.68
-5 9 1 226.11 6.71
5 9 -1 219.21 6.74
-5 9 1 215.37 6.67
-3 -9 1 33.96 1.04
3 -9 -1 32.44 1.03
-3 -9 1 31.16 1.04
-3 -9 1 33.69 1.06
3 -9 -1 32.55 1.03
-3 -9 1 32.82 1.03
3 -9 -1 32.32 1.03
-3 -9 1 35.1 1.09
3 -9 -1 32.36 1.01
3 -9 -1 33.48 1.01
3 9 -1 36.02 1.14
3 9 -1 35.19 1.09
-3 9 1 34.26 1.08
3 9 -1 36.93 1.18
-3 9 1 34.12 1.08
-3 9 1 33.48 1.15
-3 9 1 33.86 1.09
-3 9 1 34.79 1.08
3 9 -1 35.03 1.09
1 -9 -1 18.65 0.6
1 -9 -1 18.89 0.61
-1 -9 1 18.75 0.61
-1 -9 1 18.91 0.62
-1 -9 1 20.29 0.62
1 -9 -1 18.85 0.67
1 -9 -1 18.77 0.62
-1 -9 1 19.55 0.64
-1 -9 1 19.33 0.6
1 -9 -1 18.64 0.6
-1 -9 1 18.44 0.6
-1 -9 1 19.28 0.66
1 -9 -1 18.78 0.6
-1 9 1 18.88 0.7
-1 9 1 19.99 0.62
1 9 -1 20.91 0.7
-1 9 1 19.75 0.63
-1 9 1 19.75 0.62
1 9 -1 19.65 0.63
1 9 -1 20.31 0.63
-1 9 1 19.8 0.64
-1 -9 -1 72.53 2.29
1 -9 1 74.08 2.29
-1 -9 -1 75.31 2.35
1 -9 1 73.41 2.33
1 -9 1 75.95 2.3
1 -9 1 73.67 2.28
-1 -9 -1 74.71 2.29
-1 -9 -1 75.52 2.3
-1 -9 -1 76.78 2.28
-1 -9 -1 75.27 2.28
-1 9 -1 66.54 2.06
-1 9 -1 62.69 2.04
1 9 1 62.37 2.02
1 9 1 64.16 2.02
1 9 1 67.34 2.08
1 9 1 66.23 2
-1 9 -1 68.62 2.02
-1 9 -1 66.98 2
-3 -9 -1 3.09 0.18
3 -9 1 3.38 0.16
-3 -9 -1 2.96 0.12
-3 -9 -1 3.35 0.15
-3 -9 -1 3.01 0.16
3 -9 1 2.86 0.17
3 9 1 1.19 0.09
3 9 1 1.19 0.19
3 9 1 1.01 0.12
-3 9 -1 0.92 0.09
-3 9 -1 1.04 0.12
3 9 1 0.95 0.13
-3 9 -1 1.02 0.06
3 9 1 0.92 0.11
-3 9 -1 1.07 0.05
-3 9 -1 0.9 0.14
-5 -9 -1 204.55 6.46
-5 -9 -1 209.1 6.47
5 -9 1 218.01 6.47
5 -9 1 208.6 6.51
-5 -9 -1 215.43 6.43
5 9 1 184.79 5.49
5 9 1 173.35 5.41
5 9 1 170.49 5.41
5 9 1 178.95 5.38
-7 -9 -1 101.16 3.17
-7 -9 -1 103.89 3.18
7 -9 1 103.75 3.17
7 -9 1 104.64 3.18
7 9 1 99.38 3.15
7 9 1 103.18 3.26
7 9 1 102.26 3.14
9 -9 1 15.42 0.52
-9 -9 -1 14.24 0.53
9 -9 1 14.6 0.52
-9 -9 -1 14.13 0.51
-9 9 -1 9.47 0.38
-9 9 -1 9.3 0.3
9 9 1 9.09 0.44
9 9 1 8.47 0.59
9 9 1 9.74 0.42
-11 -9 -1 69.7 2.24
-11 -9 -1 72.95 2.22
-11 9 -1 63.47 1.94
-11 9 -1 65.37 2
11 9 1 59.56 2.21
11 9 1 65.41 2.02
-11 9 -1 63.44 1.94
-13 -9 -1 15.71 0.61
-13 -9 -1 16.25 0.6
-13 9 -1 11.41 0.38
13 9 1 11.08 0.5
-13 9 -1 11.67 0.47
-13 9 -1 11.41 0.39
13 9 1 9.77 0.77
-15 -9 -1 99.51 3.13
-15 -9 -1 101.62 3.15
15 9 1 92.02 2.82
-15 9 -1 93.77 2.74
-15 9 -1 89.75 2.79
15 9 1 80.29 3.06
-15 9 -1 88.67 2.74
-17 -9 -1 14.45 0.63
-17 -9 -1 13.94 0.6
-17 9 -1 13.98 0.58
17 9 1 13.62 0.61
17 9 1 12.14 0.96
-17 9 -1 13.19 0.48
-19 -9 -1 4.14 0.33
-19 -9 -1 3.06 0.32
-19 9 -1 3 0.29
19 9 1 2.82 0.3
-19 9 -1 3.2 0.25
19 9 1 3.18 0.66
-21 -9 -1 4.41 0.35
-21 -9 -1 5.23 0.41
21 9 1 3.6 0.76
21 9 1 3.65 0.32
-21 9 -1 3.82 0.34
-23 -9 -1 1.26 0.33
-23 -9 -1 0.62 0.34
-23 9 -1 0.58 0.31
23 9 1 0.77 0.26
-25 -9 -1 8.47 0.65
-25 -9 -1 8.38 0.63
-25 9 -1 5.96 0.47
-27 -9 -1 2.29 0.43
-27 -9 -1 2.02 0.42
-27 9 -1 1.04 0.37
-29 -9 -1 3.07 0.48
-29 -9 -1 3.28 0.46
-29 9 -1 3.16 0.45
-28 -10 1 3.61 0.43
-28 -10 1 2.62 0.44
-28 10 1 3.22 0.39
-26 -10 1 4.17 0.45
-26 -10 1 4.08 0.44
26 10 -1 3.63 0.44
-26 10 1 4.23 0.38
-24 -10 1 2.15 0.37
-24 -10 1 2.65 0.38
24 10 -1 2.4 0.39
-24 10 1 2.07 0.31
-22 -10 1 1.73 0.31
-22 -10 1 1.51 0.32
22 10 -1 2 0.37
-22 10 1 1.32 0.26
-20 -10 1 12.79 0.61
-20 -10 1 11.94 0.62
20 10 -1 9.61 1
20 10 -1 9.58 0.61
-20 10 1 9.65 0.43
-20 10 1 9.12 0.47
-18 -10 1 1.92 0.27
-18 -10 1 1.59 0.25
-18 10 1 3.36 0.25
18 10 -1 2.89 0.37
18 10 -1 2.61 0.63
-18 10 1 2.95 0.25
-16 -10 1 39.33 1.33
-16 -10 1 40.18 1.31
-16 10 1 31.94 1.06
16 10 -1 30.75 1.44
16 10 -1 32.92 1.18
-16 10 1 32.3 1.03
-14 -10 1 7.31 0.4
-14 -10 1 7.42 0.37
14 10 -1 7.9 0.48
-14 10 1 8.71 0.32
14 10 -1 7.46 0.74
-14 10 1 8.4 0.37
-12 -10 1 14.11 0.51
-12 -10 1 12.84 0.52
12 10 -1 13.4 0.62
-12 10 1 14.11 0.46
-12 10 1 14 0.49
12 10 -1 12.23 0.8
-10 -10 1 46.09 1.45
10 -10 -1 44.7 1.43
-10 -10 1 46.04 1.46
10 10 -1 48.09 1.54
-10 10 1 46.97 1.42
10 10 -1 41.35 1.66
-10 10 1 47.13 1.44
-8 -10 1 12.01 0.46
-8 -10 1 12.88 0.45
8 -10 -1 12.46 0.44
-8 10 1 19.11 0.59
-8 10 1 18.92 0.61
8 10 -1 18.59 0.7
-8 10 1 18.86 0.6
8 10 -1 16.6 0.85
-6 -10 1 29.16 0.96
6 -10 -1 30.54 0.95
-6 -10 1 29.71 0.96
-6 10 1 35.4 1.11
-6 10 1 36.94 1.09
-6 10 1 35.24 1.1
6 10 -1 34.43 1.26
6 10 -1 34.76 1.18
-4 -10 1 49.75 1.52
-4 -10 1 49.87 1.51
4 -10 -1 47.43 1.51
4 -10 -1 48.14 1.51
-4 -10 1 48.04 1.52
-4 10 1 56.31 1.71
4 10 -1 55.72 1.81
-4 10 1 55.15 1.78
-4 10 1 52.91 1.71
-4 10 1 55.9 1.7
-4 10 1 56.22 1.7
4 10 -1 55.14 1.76
2 -10 -1 81.24 2.49
2 -10 -1 81.34 2.5
2 -10 -1 80.84 2.5
-2 -10 1 81.72 2.55
-2 -10 1 83.55 2.5
2 -10 -1 80.95 2.51
2 -10 -1 80.39 2.5
-2 -10 1 81.91 2.52
-2 -10 1 81.26 2.5
-2 -10 1 82.68 2.5
-2 10 1 80.1 2.56
-2 10 1 84.62 2.49
2 10 -1 83.61 2.5
2 10 -1 84.85 2.57
-2 10 1 80.07 2.5
-2 10 1 80 2.49
2 10 -1 78.88 2.54
2 10 -1 82.91 2.5
-2 10 1 79.26 2.5
0 -10 -1 15.37 0.51
0 -10 1 15.33 0.51
0 -10 1 15.93 0.5
0 -10 1 15.19 0.48
0 -10 1 15.53 0.55
0 -10 -1 15.21 0.51
0 -10 -1 15.17 0.49
0 -10 -1 15.44 0.49
0 -10 1 15.04 0.52
0 -10 -1 14.71 0.5
0 -10 1 15.28 0.48
0 10 -1 13.58 0.44
0 10 1 13.33 0.45
0 10 -1 13.28 0.43
0 10 -1 13.87 0.51
0 10 1 12.85 0.44
0 10 -1 13.32 0.49
0 10 1 13 0.42
0 10 1 13.14 0.42
0 10 1 13.11 0.53
-2 -10 -1 52.58 1.59
-2 -10 -1 51.59 1.61
2 -10 1 52.9 1.6
-2 -10 -1 50.96 1.6
-2 -10 -1 52.49 1.58
2 -10 1 50.91 1.61
2 -10 1 50.73 1.58
-2 10 -1 53.42 1.6
2 10 1 51.56 1.63
2 10 1 51.6 1.64
-2 10 -1 51.07 1.65
-2 10 -1 54.22 1.67
2 10 1 50.55 1.64
2 10 1 54.04 1.61
2 10 1 53.06 1.7
-4 -10 -1 359.82 10.54
-4 -10 -1 331.94 10.57
-4 -10 -1 344.41 10.59
4 -10 1 339.67 10.54
-4 -10 -1 348.77 10.53
4 -10 1 347.16 10.65
4 10 1 294.24 8.86
4 10 1 284.58 8.87
4 10 1 278.54 8.96
4 10 1 281.03 8.79
4 10 1 297.35 8.85
-4 10 -1 298.52 8.77
-4 10 -1 286.15 9.02
-6 -10 -1 91.31 2.77
-6 -10 -1 91.43 2.75
6 -10 1 88.2 2.76
6 -10 1 87.35 2.76
6 10 1 79.5 2.58
6 10 1 85.12 2.69
6 10 1 84.68 2.59
8 -10 1 6.49 0.3
-8 -10 -1 7.05 0.29
-8 -10 -1 7.94 0.34
8 -10 1 6.99 0.3
8 10 1 9.29 0.57
8 10 1 9.19 0.41
8 10 1 8.33 0.42
-10 -10 -1 36.84 1.2
10 -10 1 37.35 1.19
10 -10 1 36.23 1.19
-10 -10 -1 37.53 1.18
10 10 1 34.71 1.14
-10 10 -1 34.35 1.11
10 10 1 31.31 1.31
-10 10 -1 34.38 1.04
-12 -10 -1 27.54 0.94
-12 -10 -1 27.69 0.91
12 10 1 21.42 1.09
-12 10 -1 23.68 0.75
-12 10 -1 24.45 0.75
12 10 1 25.31 0.87
-12 10 -1 24.15 0.83
-14 -10 -1 11.24 0.51
-14 -10 -1 10.54 0.45
-14 10 -1 8.94 0.43
14 10 1 7.12 0.76
14 10 1 8.72 0.49
-14 10 -1 9.4 0.33
-14 10 -1 9.08 0.33
-16 -10 -1 17.38 0.69
-16 -10 -1 15.91 0.63
16 10 1 13.92 0.63
16 10 1 11.67 1.03
-16 10 -1 14.41 0.49
-16 10 -1 15.16 0.59
-16 10 -1 14.01 0.49
-18 -10 -1 17.95 0.77
-18 -10 -1 18.99 0.73
-18 10 -1 15.11 0.54
18 10 1 16.03 0.67
18 10 1 13.78 1.06
-18 10 -1 15.72 0.64
-20 -10 -1 2.47 0.3
-20 -10 -1 3.44 0.37
20 10 1 1.94 0.66
-20 10 -1 1.57 0.27
20 10 1 1.83 0.29
-22 -10 -1 1.8 0.35
-22 -10 -1 2.27 0.34
22 10 1 1.72 0.8
-22 10 -1 1.38 0.31
22 10 1 1.85 0.29
-24 -10 -1 12.15 0.7
-24 -10 -1 10.11 0.61
-24 10 -1 8.65 0.58
-26 -10 -1 5.26 0.46
-26 -10 -1 5.28 0.5
-26 10 -1 3.34 0.41
-28 -10 -1 2.38 0.45
-28 -10 -1 2.83 0.45
-28 10 -1 2.28 0.42
-27 -11 1 3.29 0.43
-27 -11 1 4.03 0.48
-27 11 1 2.65 0.36
-25 -11 1 3.85 0.4
-25 -11 1 3.2 0.4
-25 11 1 3.3 0.35
25 11 -1 4.31 0.45
-23 -11 1 5.08 0.43
-23 -11 1 4.36 0.4
-23 11 1 4.86 0.36
23 11 -1 5.62 0.48
-21 -11 1 4.83 0.38
-21 -11 1 4.48 0.38
-21 11 1 5.51 0.39
21 11 -1 5.57 0.88
21 11 -1 4.98 0.45
-19 -11 1 10.11 0.55
-19 -11 1 10.07 0.57
19 11 -1 6.35 0.79
19 11 -1 7.81 0.59
-19 11 1 7.62 0.36
-19 11 1 7.68 0.42
-17 -11 1 21.73 0.84
-17 -11 1 23.1 0.84
-17 11 1 23.93 0.85
17 11 -1 23.89 1.34
-17 11 1 24.77 0.81
17 11 -1 24.92 0.95
-15 -11 1 43.48 1.46
-15 -11 1 46.37 1.48
-15 11 1 39.52 1.24
15 11 -1 34.36 1.58
15 11 -1 38.78 1.34
-15 11 1 39.61 1.21
-13 -11 1 0.88 0.19
-13 -11 1 0.7 0.2
-13 11 1 1.52 0.12
13 11 -1 0.35 0.46
13 11 -1 1.92 0.32
-13 11 1 1.65 0.16
-11 -11 1 45.66 1.46
-11 -11 1 45.11 1.46
-11 11 1 42.63 1.3
11 11 -1 40.49 1.38
11 11 -1 36.94 1.55
-11 11 1 42.66 1.27
-9 -11 1 7.88 0.37
9 -11 -1 8.63 0.34
-9 -11 1 8.28 0.35
9 11 -1 7.61 0.59
-9 11 1 8.55 0.32
9 11 -1 9.21 0.46
-9 11 1 8.43 0.29
-9 11 1 8.55 0.31
-7 -11 1 16.87 0.59
-7 -11 1 16.83 0.59
7 -11 -1 17.39 0.58
-7 11 1 15.12 0.51
-7 11 1 15.27 0.5
-7 11 1 15.27 0.49
7 11 -1 15.8 0.61
7 11 -1 14.49 0.71
-5 -11 1 65.69 2.11
-5 -11 1 71.31 2.12
5 -11 -1 68.73 2.11
-5 -11 1 66.8 2.11
-5 11 1 65.8 2.03
5 11 -1 65.86 2.16
-5 11 1 64.55 2.12
-5 11 1 67.91 2.03
5 11 -1 66.99 2.1
-3 -11 1 33.47 1.07
3 -11 -1 33.58 1.07
3 -11 -1 34.28 1.07
-3 -11 1 35.33 1.08
-3 -11 1 34.71 1.07
3 -11 -1 34.33 1.05
3 -11 -1 33.06 1.05
3 -11 -1 34.48 1.08
3 11 -1 35.4 1.17
-3 11 1 33.02 1.15
-3 11 1 33.98 1.06
-3 11 1 34.24 1.06
3 11 -1 34.25 1.12
-3 11 1 33.92 1.07
1 -11 -1 80.36 2.43
-1 -11 1 79.27 2.52
-1 -11 1 79.93 2.43
1 -11 -1 78.03 2.45
1 -11 -1 78.15 2.43
1 -11 -1 80.85 2.44
-1 -11 1 79.2 2.43
-1 -11 1 80.7 2.45
-1 11 1 66.02 2.15
1 11 -1 66.24 2.14
-1 11 1 69.42 2.07
1 11 -1 68.47 2.07
1 11 -1 70.71 2.08
-1 11 1 67.55 2.06
1 11 -1 66.08 2.11
-1 11 1 64.94 2.08
-1 11 1 67.51 2.07
1 -11 1 4.73 0.26
1 -11 1 4.58 0.22
-1 -11 -1 4.86 0.19
-1 -11 -1 5.04 0.19
-1 -11 -1 4.48 0.21
1 -11 1 4.9 0.23
1 -11 1 4.75 0.19
1 11 1 7.55 0.31
1 11 1 7.42 0.29
-1 11 -1 6.82 0.36
1 11 1 7.32 0.38
-1 11 -1 7.05 0.34
1 11 1 7.13 0.25
-1 11 -1 7.63 0.25
3 -11 1 38.87 1.21
3 -11 1 39.04 1.16
-3 -11 -1 36.91 1.2
3 -11 1 37.44 1.2
-3 -11 -1 38.17 1.17
-3 -11 -1 37.95 1.19
-3 -11 -1 38.26 1.19
3 11 1 25.34 0.86
3 11 1 26.54 0.84
-3 11 -1 26.11 0.8
-3 11 -1 25.85 0.86
3 11 1 25.47 0.93
-3 11 -1 25.74 0.88
-3 11 -1 25.84 0.8
3 11 1 25.82 0.81
3 11 1 25.72 0.86
-5 -11 -1 16.05 0.58
5 -11 1 16.31 0.56
5 -11 1 16.3 0.57
-5 -11 -1 17.4 0.53
-5 -11 -1 17.09 0.55
5 11 1 11.57 0.46
5 11 1 11.76 0.56
5 11 1 11.65 0.39
-5 11 -1 11.07 0.47
5 11 1 10.91 0.44
7 -11 1 0.88 0.16
7 -11 1 0.91 0.14
-7 -11 -1 1.24 0.16
-7 -11 -1 1.03 0.13
7 11 1 0.84 0.18
7 11 1 0.98 0.29
7 11 1 1.02 0.21
9 -11 1 41.99 1.37
9 -11 1 43.35 1.36
-9 -11 -1 42.77 1.38
-9 -11 -1 43.54 1.36
9 11 1 42.5 1.37
9 11 1 40.62 1.54
9 11 1 41.91 1.4
-11 -11 -1 38.67 1.26
-11 -11 -1 38.72 1.24
11 -11 1 37.78 1.24
-11 11 -1 32.82 1
11 11 1 30.47 1.32
11 11 1 34.34 1.12
-11 11 -1 31.76 1.07
-13 -11 -1 62 1.93
-13 -11 -1 60.37 1.96
13 11 1 52.16 1.69
-13 11 -1 50.65 1.58
-13 11 -1 54.31 1.65
-13 11 -1 52.47 1.58
13 11 1 46.26 1.92
-15 -11 -1 1.93 0.27
-15 -11 -1 1.96 0.24
15 11 1 2.96 0.32
-15 11 -1 3.69 0.28
15 11 1 2.78 0.62
-15 11 -1 3.35 0.19
-15 11 -1 3.53 0.19
-17 -11 -1 17.1 0.72
-17 -11 -1 16.57 0.68
17 11 1 14.09 0.63
-17 11 -1 14.49 0.6
-17 11 -1 14.29 0.49
17 11 1 11.1 0.98
-19 -11 -1 3.11 0.32
-19 -11 -1 3.21 0.34
19 11 1 1.56 0.63
19 11 1 2.44 0.32
-19 11 -1 2.47 0.28
-21 -11 -1 3.24 0.38
-21 -11 -1 3.56 0.37
-21 11 -1 2.12 0.31
21 11 1 2.17 0.78
21 11 1 2.64 0.33
-23 -11 -1 5.66 0.48
-23 -11 -1 5.54 0.43
23 11 1 4.02 0.44
-23 11 -1 3.87 0.37
23 11 1 5 0.89
-25 -11 -1 2.77 0.43
-25 -11 -1 2.57 0.39
-25 11 -1 2.77 0.4
-27 -11 -1 2.96 0.46
-27 -11 -1 3.62 0.43
-27 11 -1 3 0.42
-28 -12 1 5.92 0.53
-28 -12 1 6.17 0.54
-28 12 1 5.2 0.43
-26 -12 1 4.18 0.46
-26 -12 1 3.77 0.44
-26 12 1 3.09 0.36
26 12 -1 3.03 0.43
-24 -12 1 1.07 0.37
-24 -12 1 0.66 0.33
24 12 -1 1.23 0.37
-24 12 1 0.85 0.28
-22 -12 1 2.61 0.36
-22 -12 1 1.83 0.35
22 12 -1 2.11 0.39
-22 12 1 2.55 0.28
22 12 -1 3.13 0.78
-20 -12 1 6.09 0.49
-20 -12 1 6.11 0.49
20 12 -1 4.25 0.75
20 12 -1 4.74 0.47
-20 12 1 4.81 0.38
-18 -12 1 6.06 0.46
-18 -12 1 6.26 0.47
-18 12 1 4.6 0.27
18 12 -1 3.61 0.68
-18 12 1 4.35 0.33
18 12 -1 4.33 0.43
-16 -12 1 31.44 1.06
-16 -12 1 29.7 1.07
16 12 -1 31.09 1.14
-16 12 1 31.34 0.99
-16 12 1 32.47 1.04
16 12 -1 28.11 1.42
-14 -12 1 13.69 0.55
-14 -12 1 13.09 0.57
14 12 -1 8.01 0.87
14 12 -1 8.89 0.53
-14 12 1 9.52 0.34
-14 12 1 9.35 0.39
-12 -12 1 3.32 0.26
-12 -12 1 3.6 0.26
-12 12 1 4.39 0.25
12 12 -1 5.1 0.41
12 12 -1 3.65 0.53
-12 12 1 4.23 0.19
-10 -12 1 21.41 0.76
10 -12 -1 22.36 0.74
-10 -12 1 21.81 0.76
-10 12 1 20.94 0.64
-10 12 1 20.54 0.67
10 12 -1 19.36 0.78
-10 12 1 21.3 0.65
10 12 -1 17.59 0.94
-8 -12 1 3.46 0.25
-8 -12 1 3.69 0.23
8 -12 -1 4.05 0.24
8 12 -1 2.29 0.37
8 12 -1 2.83 0.28
-8 12 1 2.71 0.13
-8 12 1 2.6 0.18
-8 12 1 2.58 0.15
6 -12 -1 150.8 4.56
-6 -12 1 147.07 4.56
-6 12 1 121.72 3.83
-6 12 1 124.38 3.73
-6 12 1 121.53 3.74
6 12 -1 121.69 3.88
-6 12 1 122.72 3.74
6 12 -1 122.12 3.81
-4 -12 1 17.41 0.57
4 -12 -1 16.74 0.57
-4 -12 1 17.16 0.58
4 -12 -1 16.81 0.56
-4 -12 1 16.39 0.57
4 12 -1 21.9 0.8
4 12 -1 20.73 0.74
-4 12 1 20.37 0.65
-4 12 1 19.9 0.66
-4 12 1 20.33 0.76
-2 -12 1 6.86 0.27
-2 -12 1 6.63 0.3
2 -12 -1 6.7 0.28
2 -12 -1 6.65 0.24
-2 -12 1 6.92 0.26
2 -12 -1 6.97 0.24
-2 -12 1 7.14 0.26
2 -12 -1 7.05 0.26
-2 12 1 5.19 0.21
-2 12 1 5.24 0.23
-2 12 1 5.17 0.35
-2 12 1 5.17 0.2
-2 12 1 5.17 0.19
2 12 -1 5.91 0.31
2 12 -1 5.81 0.37
0 -12 1 34.43 1.07
0 -12 1 34.94 1.1
0 -12 1 34.07 1.07
0 -12 -1 35.03 1.12
0 -12 -1 34.86 1.09
0 -12 -1 35.02 1.09
0 -12 -1 35.75 1.09
0 12 -1 32.88 1.03
0 12 1 33.22 1.14
0 12 1 33.82 1.03
0 12 -1 33.47 1.12
0 12 1 33.5 1.05
0 12 1 33.38 1.03
0 12 -1 33.36 1.1
0 12 1 31.87 1.06
-2 -12 -1 54.34 1.65
2 -12 1 53.06 1.67
2 -12 1 51.89 1.66
-2 -12 -1 54.43 1.64
2 -12 1 52.15 1.63
-2 -12 -1 53.2 1.64
-2 -12 -1 53.94 1.66
2 12 1 62.84 1.88
-2 12 -1 63.1 1.87
2 12 1 60.5 1.91
2 12 1 58.81 1.92
-2 12 -1 62.13 1.95
-2 12 -1 60.55 1.92
2 12 1 60.19 1.9
2 12 1 60.93 1.98
-4 -12 -1 20.32 0.66
-4 -12 -1 19.6 0.62
4 -12 1 19.49 0.66
-4 -12 -1 19.28 0.66
4 -12 1 18.67 0.64
-4 -12 -1 19.45 0.64
4 12 1 22.27 0.77
-4 12 -1 23.12 0.8
4 12 1 23.57 0.73
4 12 1 22.11 0.78
-4 12 -1 23.42 0.71
-4 12 -1 23.1 0.78
4 12 1 21.47 0.78
4 12 1 22.84 0.87
-4 12 -1 23.6 0.71
-6 -12 -1 3.1 0.2
6 -12 1 2.67 0.21
-6 -12 -1 2.92 0.23
6 -12 1 2.75 0.19
6 12 1 4.93 0.33
6 12 1 5.04 0.32
-6 12 -1 4.01 0.29
6 12 1 5.23 0.44
8 -12 1 33.93 1.09
-8 -12 -1 33.89 1.08
-8 -12 -1 33.39 1.1
8 -12 1 33.66 1.09
8 12 1 34.69 1.14
8 12 1 33.31 1.27
8 12 1 33.05 1.16
10 -12 1 58.87 1.89
-10 -12 -1 59.86 1.88
-10 -12 -1 60.67 1.9
10 -12 1 60.5 1.89
10 12 1 56.57 1.78
10 12 1 51.96 1.97
-10 12 -1 55.79 1.75
-12 -12 -1 9.2 0.46
-12 -12 -1 9.23 0.41
-12 12 -1 9.28 0.44
12 12 1 8.06 0.84
-12 12 -1 10.34 0.33
12 12 1 10.68 0.53
-14 -12 -1 18.29 0.68
-14 -12 -1 17.6 0.71
-14 12 -1 14.96 0.49
-14 12 -1 15.95 0.6
-14 12 -1 14.27 0.48
14 12 1 13.48 1.03
14 12 1 15.41 0.68
-16 -12 -1 26.9 0.97
-16 -12 -1 25.92 0.93
16 12 1 21.86 0.89
-16 12 -1 23.64 0.74
-16 12 -1 23.45 0.84
16 12 1 20.05 1.22
-16 12 -1 24.28 0.8
-18 -12 -1 6.71 0.5
-18 -12 -1 6.18 0.46
-18 12 -1 6.83 0.44
18 12 1 6.18 0.84
18 12 1 6.51 0.51
-20 -12 -1 3.72 0.37
-20 -12 -1 3.83 0.34
20 12 1 3.06 0.35
-20 12 -1 2.67 0.31
20 12 1 2.23 0.69
-22 -12 -1 2.36 0.38
-22 -12 -1 2.99 0.36
22 12 1 3.38 0.37
22 12 1 3.16 0.79
-22 12 -1 3.11 0.36
-24 -12 -1 2.34 0.36
-24 -12 -1 2.41 0.4
24 12 1 4.13 0.91
-24 12 -1 3.22 0.37
-26 -12 -1 4.96 0.51
-26 -12 -1 6.91 0.52
-26 12 -1 4.21 0.42
-28 -12 -1 0.62 0.45
-28 -12 -1 0.69 0.39
-28 12 -1 1.46 0.38
-27 -13 1 2.56 0.45
-27 -13 1 2.63 0.46
-27 13 1 2.68 0.36
-25 -13 1 4.02 0.46
-25 -13 1 3.96 0.46
-25 13 1 2.47 0.34
25 13 -1 3.05 0.45
-23 -13 1 1.76 0.37
-23 -13 1 0.88 0.33
23 13 -1 2.05 0.79
23 13 -1 2.13 0.41
-23 13 1 1.01 0.27
-21 -13 1 2.23 0.33
-21 -13 1 2.63 0.36
-21 13 1 1.56 0.26
21 13 -1 1.89 0.78
21 13 -1 1.57 0.4
-19 -13 1 2.56 0.33
-19 -13 1 2.38 0.31
19 13 -1 1.7 0.38
19 13 -1 1.81 0.66
-19 13 1 2.45 0.26
-17 -13 1 5.32 0.41
-17 -13 1 6.22 0.45
-17 13 1 4.54 0.31
17 13 -1 4.56 0.44
17 13 -1 3.2 0.66
-17 13 1 4.28 0.25
-15 -13 1 8.27 0.44
-15 -13 1 8.3 0.47
-15 13 1 10.32 0.42
15 13 -1 9.47 0.62
15 13 -1 8.28 0.85
-15 13 1 10.34 0.37
-13 -13 1 17.11 0.67
-13 -13 1 17.34 0.66
-13 13 1 15.25 0.51
13 13 -1 12.12 0.9
-13 13 1 15.83 0.5
-13 13 1 15.72 0.55
13 13 -1 14.46 0.68
-11 -13 1 13.36 0.57
11 -13 -1 15 0.54
-11 -13 1 14.15 0.54
-11 13 1 16.54 0.53
-11 13 1 16.57 0.56
-11 13 1 16.15 0.52
11 13 -1 15.62 0.69
11 13 -1 12.62 0.86
-9 -13 1 14.39 0.53
-9 -13 1 13.12 0.52
9 -13 -1 13.73 0.51
-9 13 1 12.25 0.4
-9 13 1 11.73 0.42
9 13 -1 11.83 0.56
9 13 -1 9.74 0.7
-9 13 1 12.23 0.39
-7 -13 1 8.27 0.37
7 -13 -1 8.31 0.35
-7 -13 1 9.16 0.37
7 13 -1 3.78 0.41
7 13 -1 5.21 0.41
-7 13 1 4.1 0.21
-7 13 1 3.97 0.34
-7 13 1 4.1 0.19
-7 13 1 4.03 0.17
-5 -13 1 58.66 1.78
5 -13 -1 56.57 1.77
-5 -13 1 57.44 1.77
-5 -13 1 55.9 1.78
5 -13 -1 55.64 1.78
5 13 -1 47.53 1.58
-5 13 1 49.05 1.48
-5 13 1 47.31 1.49
5 13 -1 47.95 1.64
-5 13 1 48.31 1.6
-3 -13 1 51.27 1.56
3 -13 -1 50.85 1.56
3 -13 -1 48.96 1.57
-3 -13 1 49.86 1.56
3 -13 -1 49.87 1.53
-3 -13 1 49.61 1.56
-3 -13 1 50.64 1.59
-3 13 1 46.17 1.39
-3 13 1 43.92 1.4
3 13 -1 45.77 1.51
-3 13 1 44.17 1.5
-3 13 1 45.03 1.4
3 13 -1 45.49 1.47
1 -13 -1 56.37 1.74
1 -13 -1 57.22 1.75
-1 -13 1 56.07 1.78
-1 -13 1 58.03 1.76
1 -13 -1 56.7 1.75
-1 -13 1 55.5 1.74
-1 -13 1 57.15 1.74
-1 13 1 51.84 1.58
1 13 -1 51.26 1.68
-1 13 1 52.04 1.6
-1 13 1 51.8 1.61
1 13 -1 48.46 1.64
-1 13 1 51.37 1.69
-1 13 1 53.26 1.59
-1 -13 -1 16.21 0.54
-1 -13 -1 15.69 0.53
-1 -13 -1 16.98 0.53
1 -13 1 15.59 0.56
1 -13 1 16.24 0.55
-1 13 -1 17.69 0.66
1 13 1 17.86 0.56
1 13 1 16.94 0.59
-1 13 -1 17.95 0.64
-1 13 -1 17.7 0.56
1 13 1 16.61 0.6
1 13 1 17.33 0.64
1 13 1 18.11 0.71
-3 -13 -1 2.7 0.17
-3 -13 -1 2.79 0.14
-3 -13 -1 2.65 0.17
-3 -13 -1 2.66 0.2
3 -13 1 2.74 0.12
3 -13 1 2.62 0.18
3 -13 1 2.53 0.2
3 13 1 3.72 0.25
-3 13 -1 3.71 0.17
-3 13 -1 3.93 0.3
3 13 1 3.68 0.26
3 13 1 3.81 0.39
3 13 1 3.89 0.17
-3 13 -1 3.92 0.15
3 13 1 4.11 0.28
-3 13 -1 3.55 0.26
-5 -13 -1 1.18 0.12
-5 -13 -1 1.25 0.16
-5 -13 -1 1.11 0.09
5 -13 1 1.45 0.16
5 -13 1 1.53 0.18
-5 13 -1 2.45 0.11
-5 13 -1 2.48 0.1
-5 13 -1 1.86 0.19
5 13 1 2.25 0.23
5 13 1 2.07 0.31
-5 13 -1 2.09 0.23
5 13 1 2.12 0.21
-7 -13 -1 90.54 2.76
7 -13 1 88.68 2.77
7 -13 1 90.04 2.78
-7 -13 -1 88.74 2.78
7 13 1 94.92 3.04
-7 13 -1 90.79 2.94
7 13 1 91.87 2.91
7 13 1 94.82 2.93
-9 -13 -1 46.68 1.49
-9 -13 -1 47.39 1.51
9 -13 1 46.98 1.49
9 -13 1 46.81 1.5
9 13 1 43.88 1.64
9 13 1 45.04 1.46
11 -13 1 52.69 1.67
-11 -13 -1 50.55 1.65
11 -13 1 53.01 1.67
-11 -13 -1 52.85 1.69
-11 13 -1 51.02 1.61
11 13 1 46.76 1.85
11 13 1 52.02 1.65
-13 -13 -1 10.84 0.51
-13 -13 -1 8.97 0.45
13 13 1 9.41 0.83
13 13 1 9.84 0.55
-13 13 -1 10.74 0.34
-13 13 -1 9.49 0.46
-15 -13 -1 58.54 1.85
-15 -13 -1 56.74 1.88
-15 13 -1 50.59 1.56
-15 13 -1 54.58 1.57
-15 13 -1 51.97 1.65
15 13 1 51.96 1.71
15 13 1 43.3 1.96
-17 -13 -1 9.82 0.53
-17 -13 -1 11.08 0.58
-17 13 -1 10.34 0.5
17 13 1 9.82 0.95
17 13 1 10.29 0.58
-19 -13 -1 11.8 0.59
-19 -13 -1 10.37 0.62
-19 13 -1 9.49 0.52
19 13 1 10.02 0.57
19 13 1 7.75 0.9
-21 -13 -1 4.04 0.36
-21 -13 -1 3.86 0.41
21 13 1 2.8 0.77
21 13 1 3.44 0.39
-21 13 -1 2.97 0.34
-23 -13 -1 3.39 0.38
-23 -13 -1 2.84 0.43
23 13 1 3.55 0.85
-23 13 -1 3.3 0.37
23 13 1 3.57 0.59
-25 -13 -1 2.49 0.39
-25 -13 -1 4.5 0.49
25 13 1 3.85 0.94
-25 13 -1 1.91 0.39
-27 -13 -1 1.59 0.43
-27 -13 -1 1.45 0.44
-27 13 -1 1 0.37
-26 -14 1 2.28 0.44
-26 -14 1 1.74 0.4
-26 14 1 1.59 0.33
26 14 -1 2.48 0.45
-24 -14 1 0.24 0.37
-24 -14 1 0.81 0.37
24 14 -1 0.74 0.41
-24 14 1 0.16 0.27
-22 -14 1 2.56 0.39
-22 -14 1 2.82 0.38
-22 14 1 1.88 0.27
22 14 -1 2.1 0.83
22 14 -1 2.65 0.44
-20 -14 1 3.37 0.35
-20 -14 1 3.13 0.36
-20 14 1 2.96 0.28
20 14 -1 2.88 0.73
20 14 -1 3.44 0.44
-18 -14 1 6.98 0.5
-18 -14 1 6.41 0.45
18 14 -1 5.21 0.76
18 14 -1 6.45 0.52
-18 14 1 6.13 0.38
-16 -14 1 13.19 0.6
-16 -14 1 12.35 0.6
16 14 -1 9.71 0.6
-16 14 1 10.18 0.37
16 14 -1 8.03 0.82
-16 14 1 10.16 0.44
-14 -14 1 6.08 0.41
-14 -14 1 5.35 0.4
-14 14 1 4.47 0.22
14 14 -1 3.51 0.6
-14 14 1 4.08 0.2
14 14 -1 3.99 0.4
-14 14 1 3.95 0.28
12 -14 -1 18.73 0.66
-12 -14 1 19.39 0.71
-12 -14 1 17.55 0.68
12 14 -1 16.71 0.74
12 14 -1 13.58 0.94
-12 14 1 17.63 0.56
-12 14 1 17.37 0.6
-12 14 1 17.71 0.56
-10 -14 1 8.22 0.38
10 -14 -1 9.04 0.39
-10 -14 1 8.24 0.4
10 14 -1 10.66 0.6
-10 14 1 10.95 0.4
-10 14 1 10.74 0.36
10 14 -1 8.29 0.78
-10 14 1 10.39 0.36
8 -14 -1 28.1 0.93
-8 -14 1 27.36 0.94
-8 -14 1 28.86 0.94
-8 14 1 23.65 0.91
-8 14 1 24.75 0.79
8 14 -1 23.43 1.03
8 14 -1 24.73 0.91
-8 14 1 25.03 0.77
-8 14 1 23.89 0.77
6 -14 -1 24.27 0.8
-6 -14 1 24.02 0.8
-6 -14 1 23.44 0.8
6 14 -1 27.69 1.07
-6 14 1 27.58 0.86
-6 14 1 26.95 0.99
6 14 -1 28.06 0.98
-6 14 1 27.31 0.87
4 -14 -1 6.15 0.27
-4 -14 1 6.26 0.27
-4 -14 1 5.67 0.26
-4 -14 1 5.76 0.27
4 -14 -1 6.05 0.28
-4 14 1 9.27 0.31
4 14 -1 7.93 0.49
4 14 -1 8.64 0.43
-4 14 1 8.85 0.3
-4 14 1 8.67 0.45
-4 14 1 8.45 0.33
2 -14 -1 38.45 1.2
-2 -14 1 39.05 1.22
2 -14 -1 39.48 1.25
2 -14 -1 38.75 1.2
-2 -14 1 39.13 1.23
2 -14 -1 39.37 1.23
-2 -14 1 39.55 1.22
-2 14 1 33.18 1.06
-2 14 1 32.74 1.16
2 14 -1 32.32 1.12
2 14 -1 33.79 1.18
-2 14 1 33.9 1.04
-2 14 1 34.21 1.05
0 -14 -1 33.61 1.08
0 -14 -1 33.85 1.04
0 -14 -1 32.64 1.05
0 -14 1 32.49 1.06
0 -14 1 33.47 1.08
0 -14 1 33.39 1.02
0 -14 -1 33.89 1.04
0 -14 1 32.66 1.02
0 14 -1 25.34 0.9
0 14 1 24.64 0.82
0 14 1 24.36 0.81
0 14 1 25.56 0.91
0 14 -1 23.85 0.86
0 14 1 24.49 0.78
0 14 1 25.51 0.78
2 -14 1 48.65 1.55
-2 -14 -1 48.76 1.52
2 -14 1 48.65 1.53
-2 -14 -1 48.63 1.53
-2 -14 -1 48.91 1.51
-2 14 -1 43.3 1.39
-2 14 -1 43.15 1.3
2 14 1 41.38 1.36
2 14 1 42.26 1.43
2 14 1 39.89 1.35
-2 14 -1 40.78 1.36
2 14 1 42.82 1.3
2 14 1 41.31 1.33
-4 -14 -1 30.05 0.98
4 -14 1 29.85 0.97
-4 -14 -1 30.68 0.94
4 -14 1 30.12 1
-4 14 -1 31.97 0.97
4 14 1 30.65 1.05
-4 14 -1 31.92 1.08
-4 14 -1 30.85 0.98
-4 14 -1 31.09 1.05
4 14 1 30.54 1.05
4 14 1 32.37 1.15
6 -14 1 64.64 2.01
-6 -14 -1 65.29 1.97
-6 -14 -1 64.57 2
-6 -14 -1 63.42 2.02
6 -14 1 63.37 2.02
-6 14 -1 67.52 2.05
6 14 1 65.61 2.14
6 14 1 67.04 2.15
6 14 1 67.51 2.25
-6 14 -1 68.5 2.18
-6 14 -1 68.3 2.05
-8 -14 -1 20.59 0.71
-8 -14 -1 20.46 0.74
8 -14 1 20.29 0.71
8 -14 1 21.35 0.72
-8 14 -1 21.52 0.82
8 14 1 21.92 1
8 14 1 21 0.8
8 14 1 21.27 0.81
-10 -14 -1 24.11 0.85
10 -14 1 24.01 0.82
10 -14 1 23.8 0.82
-10 -14 -1 23.89 0.82
10 14 1 24.78 0.88
-10 14 -1 23.46 0.83
10 14 1 23.09 1.09
12 -14 1 11.46 0.5
-12 -14 -1 11.28 0.53
-12 -14 -1 11.1 0.48
-12 14 -1 10.08 0.45
12 14 1 10.66 0.57
12 14 1 8.26 0.81
-14 -14 -1 38.47 1.29
-14 -14 -1 39.77 1.33
-14 14 -1 38.73 1.21
14 14 1 36.62 1.27
14 14 1 31.58 1.54
-16 -14 -1 33.79 1.19
-16 -14 -1 33.97 1.16
-16 14 -1 30.99 1.05
16 14 1 31.97 1.15
16 14 1 27.15 1.44
-18 -14 -1 21.5 0.87
-18 -14 -1 21.87 0.84
-18 14 -1 16.86 0.68
18 14 1 16.94 0.75
18 14 1 14.07 1.13
-20 -14 -1 8.36 0.59
-20 -14 -1 7.22 0.53
20 14 1 4.39 0.81
-20 14 -1 5.07 0.38
20 14 1 5.63 0.46
-22 -14 -1 1.1 0.33
-22 -14 -1 1.15 0.37
22 14 1 0.66 0.73
22 14 1 0.85 0.33
-22 14 -1 0.21 0.29
-24 -14 -1 1.15 0.4
-24 -14 -1 1.11 0.35
24 14 1 1.67 0.91
-24 14 -1 0.22 0.33
-26 -14 -1 2.38 0.4
-26 -14 -1 2.29 0.46
-26 14 -1 2.07 0.4
-27 -15 1 4.1 0.51
-27 -15 1 3.68 0.48
-27 15 1 2.67 0.48
-25 -15 1 8.86 0.73
-25 -15 1 8.67 0.63
25 15 -1 10.28 0.73
-25 15 1 8.37 0.54
-23 -15 1 0.72 0.36
-23 -15 1 0.88 0.36
-23 15 1 1.4 0.28
23 15 -1 1.62 0.44
23 15 -1 0.99 0.86
-21 -15 1 8.53 0.56
-21 -15 1 9.5 0.61
21 15 -1 9.24 0.7
21 15 -1 7.67 0.94
-21 15 1 8.56 0.49
-19 -15 1 5.75 0.46
-19 -15 1 4.83 0.41
19 15 -1 4.17 0.46
-19 15 1 4.14 0.3
19 15 -1 3.71 0.8
-17 -15 1 10.93 0.58
-17 -15 1 10.89 0.58
-17 15 1 10.65 0.39
17 15 -1 10.57 0.68
17 15 -1 8.27 0.91
-17 15 1 9.8 0.46
-15 -15 1 23.11 0.85
-15 -15 1 22.18 0.87
-15 15 1 15.55 0.51
15 15 -1 14.55 0.73
15 15 -1 11.67 1
-15 15 1 15.6 0.57
-15 15 1 15.06 0.51
-13 -15 1 10.11 0.5
-13 -15 1 10.63 0.48
13 15 -1 5.86 0.69
-13 15 1 7.95 0.37
13 15 -1 8.08 0.55
-13 15 1 8.03 0.3
-13 15 1 8.47 0.31
-11 -15 1 30.26 1.01
-11 -15 1 28.46 1.02
11 -15 -1 29.94 0.99
11 15 -1 30.2 1.14
-11 15 1 32.15 1.01
-11 15 1 31.53 0.98
-11 15 1 32.78 0.98
11 15 -1 28.23 1.33
-9 -15 1 16.64 0.61
9 -15 -1 15.95 0.59
-9 -15 1 16.06 0.61
9 15 -1 18.62 1.01
9 15 -1 19.57 0.82
-9 15 1 20.5 0.68
-9 15 1 21.43 0.65
-9 15 1 20.98 0.66
-9 15 1 20.07 0.82
7 -15 -1 19.67 0.68
-7 -15 1 19.87 0.68
-7 -15 1 19.15 0.69
-7 15 1 20.47 0.81
7 15 -1 19.73 0.79
7 15 -1 19.88 0.91
-7 15 1 20.75 0.65
-7 15 1 20.48 0.66
-7 15 1 20.09 0.67
5 -15 -1 13.95 0.52
-5 -15 1 13.49 0.5
5 -15 -1 13.8 0.5
-5 -15 1 13.94 0.49
5 15 -1 11.34 0.53
-5 15 1 10.87 0.4
5 15 -1 12.17 0.66
-5 15 1 11.17 0.38
-5 15 1 10.87 0.54
-3 -15 1 2.83 0.2
-3 -15 1 2.79 0.19
-3 -15 1 2.75 0.22
3 -15 -1 3.05 0.22
3 -15 -1 2.97 0.2
-3 -15 1 2.92 0.17
-3 15 1 4.47 0.23
3 15 -1 4.17 0.43
-3 15 1 4.42 0.18
-3 15 1 4.64 0.21
-3 15 1 4.1 0.36
3 15 -1 4.3 0.34
-1 -15 1 56.42 1.75
1 -15 -1 55.9 1.73
-1 -15 1 55.63 1.72
1 -15 -1 55.21 1.72
-1 -15 1 57.04 1.73
1 -15 -1 57.02 1.74
1 -15 -1 55.63 1.77
-1 15 1 50.61 1.53
1 15 -1 50.81 1.65
-1 15 1 48.58 1.54
1 15 -1 49.4 1.61
-1 15 1 48.62 1.65
-1 15 1 48.92 1.56
-1 -15 -1 13.63 0.47
-1 -15 -1 14.02 0.46
1 -15 1 13.41 0.48
1 -15 1 13.08 0.5
-1 -15 -1 13.53 0.46
-1 -15 -1 13.35 0.5
1 15 1 9.97 0.45
1 15 1 10.81 0.36
-1 15 -1 10.29 0.46
1 15 1 10.32 0.44
1 15 1 10.21 0.41
-1 15 -1 10.56 0.51
1 15 1 11.28 0.56
-3 -15 -1 19.9 0.66
-3 -15 -1 19.62 0.68
-3 -15 -1 20.01 0.64
3 -15 1 19.1 0.67
-3 -15 -1 19.76 0.66
3 -15 1 20.19 0.7
3 -15 1 21 0.63
3 15 1 24.46 0.94
-3 15 -1 24.47 0.77
-3 15 -1 24.5 0.88
3 15 1 23.79 0.86
-3 15 -1 23.87 0.86
3 15 1 23.92 0.84
3 15 1 24.8 0.83
-5 -15 -1 39.36 1.33
5 -15 1 41.96 1.33
-5 -15 -1 41.95 1.31
-5 -15 -1 42.51 1.29
5 -15 1 41.42 1.34
5 15 1 37.63 1.37
5 15 1 37.76 1.27
-5 15 -1 38.69 1.3
-5 15 -1 37.23 1.18
5 15 1 37.9 1.27
-5 15 -1 38.11 1.26
-5 15 -1 39.06 1.17
7 -15 1 8.79 0.39
-7 -15 -1 9.28 0.34
7 -15 1 9.73 0.43
-7 -15 -1 9.79 0.38
-7 -15 -1 9.42 0.42
-7 15 -1 5.32 0.18
7 15 1 5.26 0.42
-7 15 -1 5.06 0.18
-7 15 -1 4.57 0.36
7 15 1 5.36 0.54
7 15 1 4.96 0.36
9 -15 1 18.49 0.68
-9 -15 -1 18.83 0.67
-9 -15 -1 19.59 0.72
9 -15 1 19.53 0.7
9 15 1 20.04 0.76
9 15 1 19.77 0.97
-9 15 -1 19.66 0.8
-11 -15 -1 2.39 0.23
11 -15 1 2.21 0.23
11 -15 1 2.03 0.23
-11 -15 -1 1.97 0.25
-11 15 -1 4.08 0.33
11 15 1 4.69 0.41
11 15 1 3.89 0.57
-13 -15 -1 2.42 0.25
-13 -15 -1 3.35 0.3
13 15 1 1.83 0.55
-13 15 -1 2.4 0.25
13 15 1 2.84 0.35
-15 -15 -1 23.31 0.89
-15 -15 -1 23.5 0.86
15 15 1 16.14 1.13
-15 15 -1 20.85 0.74
15 15 1 19.76 0.83
-17 -15 -1 8.84 0.52
-17 -15 -1 8.4 0.56
17 15 1 6.15 0.52
-17 15 -1 5.97 0.41
17 15 1 3.8 0.72
-19 -15 -1 2.83 0.34
-19 -15 -1 3.11 0.38
-19 15 -1 1.75 0.29
19 15 1 1.85 0.67
19 15 1 1.85 0.36
-21 -15 -1 0.79 0.33
-21 -15 -1 0.72 0.34
-21 15 -1 0.22 0.28
21 15 1 0.91 0.36
21 15 1 0.44 0.78
-23 -15 -1 0.52 0.38
-23 -15 -1 0.33 0.34
23 15 1 -0.19 0.75
-23 15 -1 -0.3 0.29
-25 -15 -1 4.38 0.44
-25 -15 -1 5.11 0.52
25 15 1 4.09 0.96
-25 15 -1 3.85 0.42
-26 -16 1 2.45 0.48
-26 -16 1 2.4 0.44
26 16 -1 1.25 0.47
-24 -16 1 4.8 0.47
-24 -16 1 4.84 0.48
-24 16 1 5.83 0.41
24 16 -1 7.62 0.7
24 16 -1 7.41 1.11
-22 -16 1 1.84 0.39
-22 -16 1 1.65 0.37
-22 16 1 1.42 0.27
22 16 -1 1.18 0.74
22 16 -1 2.15 0.45
-22 16 1 1.85 0.26
-20 -16 1 8.29 0.6
-20 -16 1 7.63 0.53
20 16 -1 5.96 0.85
20 16 -1 6.64 0.56
-20 16 1 6.61 0.43
-20 16 1 7.07 0.32
-18 -16 1 9.43 0.6
-18 -16 1 9.78 0.58
-18 16 1 7.66 0.31
18 16 -1 7.76 0.65
-18 16 1 6.83 0.4
18 16 -1 5.45 0.8
-16 -16 1 1.18 0.28
-16 -16 1 1.02 0.28
-16 16 1 2.16 0.15
16 16 -1 1.35 0.59
-16 16 1 1.65 0.21
16 16 -1 1.99 0.37
-14 -16 1 19.07 0.76
-14 -16 1 19.08 0.75
14 16 -1 11.4 0.97
14 16 -1 14.43 0.78
-14 16 1 14.89 0.53
-14 16 1 14.65 0.54
-14 16 1 14.49 0.49
12 -16 -1 12.21 0.5
-12 -16 1 12.98 0.53
-12 -16 1 11.67 0.56
12 16 -1 8.7 0.92
12 16 -1 11.43 0.68
-12 16 1 10.6 0.43
-12 16 1 10.71 0.38
-12 16 1 11.33 0.38
-10 -16 1 34.54 1.15
10 -16 -1 34.21 1.13
-10 -16 1 34.36 1.15
-10 16 1 32.52 1.22
-10 16 1 32.53 1.05
-10 16 1 33.63 1.03
-10 16 1 34.4 1.03
10 16 -1 30.05 1.4
10 16 -1 32.17 1.19
-8 -16 1 33.03 1.08
8 -16 -1 32.62 1.07
-8 -16 1 32.18 1.08
-8 16 1 37.1 1.15
-8 16 1 37.35 1.31
-8 16 1 36.97 1.13
8 16 -1 34.29 1.4
8 16 -1 35.35 1.27
-8 16 1 35.46 1.13
-6 -16 1 5.6 0.32
-6 -16 1 5.34 0.28
-6 -16 1 5.82 0.31
6 -16 -1 6.08 0.32
-6 16 1 5.19 0.24
6 16 -1 4.79 0.52
-6 16 1 5.03 0.22
-6 16 1 4.95 0.45
6 16 -1 5.44 0.42
4 -16 -1 16.17 0.56
-4 -16 1 15.63 0.53
-4 -16 1 15.56 0.54
-4 -16 1 14.8 0.58
-4 -16 1 15.03 0.54
4 -16 -1 15.46 0.54
4 16 -1 13.18 0.68
-4 16 1 12.54 0.43
4 16 -1 12.08 0.56
-4 16 1 12.81 0.42
-4 16 1 12.28 0.45
-4 16 1 12.46 0.61
-2 -16 1 29.31 0.94
2 -16 -1 28.7 0.89
-2 -16 1 29.4 0.98
-2 -16 1 29 0.91
-2 -16 1 28.04 0.91
2 -16 -1 27.89 0.95
2 -16 -1 29.77 0.89
2 -16 -1 28.5 0.93
2 16 -1 30.06 1.08
-2 16 1 28.71 0.96
-2 16 1 29.75 0.93
2 16 -1 29.06 1.03
-2 16 1 30.09 0.95
-2 16 1 29.66 1.09
0 -16 -1 25.8 0.83
0 -16 -1 26.23 0.83
0 -16 1 26.06 0.89
0 -16 1 25.61 0.8
0 -16 -1 26.29 0.84
0 -16 -1 25.88 0.88
0 -16 1 26.5 0.86
0 16 -1 21.23 0.8
0 16 1 20.96 0.7
0 16 1 20.93 0.82
0 16 1 21.29 0.66
0 16 1 20.83 0.75
0 16 1 19.88 0.72
0 16 -1 20.19 0.76
-2 -16 -1 1.27 0.12
-2 -16 -1 1.34 0.21
2 -16 1 1.26 0.18
-2 -16 -1 1.38 0.15
-2 -16 -1 1.56 0.12
2 -16 1 1.48 0.16
2 16 1 3.32 0.25
-2 16 -1 3.19 0.31
-2 16 -1 3.56 0.31
2 16 1 3.53 0.29
2 16 1 3.79 0.4
2 16 1 3.58 0.29
-4 -16 -1 1.97 0.15
4 -16 1 1.63 0.2
4 -16 1 1.75 0.17
-4 -16 -1 1.65 0.17
-4 -16 -1 1.54 0.15
-4 16 -1 2.02 0.13
-4 16 -1 1.62 0.24
-4 16 -1 1.73 0.23
4 16 1 1.89 0.33
4 16 1 1.56 0.23
4 16 1 1.66 0.23
6 -16 1 -0.03 0.16
-6 -16 -1 -0.04 0.09
6 -16 1 0.14 0.16
-6 -16 -1 -0.04 0.16
-6 -16 -1 0.13 0.13
-6 16 -1 0.79 0.07
-6 16 -1 0.73 0.08
6 16 1 0.84 0.35
-6 16 -1 0.93 0.23
6 16 1 1.03 0.25
-6 16 -1 0.55 0.24
6 16 1 1.03 0.26
-8 -16 -1 5.17 0.23
-8 -16 -1 4.78 0.3
-8 -16 -1 5.15 0.34
8 -16 1 4.94 0.3
8 -16 1 5.08 0.35
8 16 1 3.2 0.47
-8 16 -1 3.93 0.14
8 16 1 3.64 0.34
-8 16 -1 3.55 0.14
-8 16 -1 4.21 0.4
10 -16 1 7.92 0.4
-10 -16 -1 8.14 0.44
-10 -16 -1 7.74 0.39
10 -16 1 8.19 0.42
-10 16 -1 5.89 0.43
10 16 1 6.96 0.5
10 16 1 5.26 0.6
-12 -16 -1 6.03 0.42
12 -16 1 5.32 0.35
-12 -16 -1 4.55 0.36
12 -16 1 4.89 0.36
12 16 1 4.01 0.62
12 16 1 5.26 0.43
-12 16 -1 5.32 0.36
-14 -16 -1 14.02 0.63
-14 -16 -1 12.79 0.59
-14 16 -1 9.73 0.49
14 16 1 9.44 0.91
14 16 1 10.44 0.62
-16 -16 -1 1.11 0.28
-16 -16 -1 1.18 0.29
16 16 1 0.59 0.34
16 16 1 -0.07 0.57
-16 16 -1 0.78 0.23
-18 -16 -1 2.83 0.33
-18 -16 -1 3.06 0.36
18 16 1 0.97 0.65
-18 16 -1 1.92 0.28
18 16 1 2.06 0.38
-20 -16 -1 3.67 0.42
-20 -16 -1 4.1 0.4
20 16 1 3.4 0.8
20 16 1 4.39 0.44
-20 16 -1 3.23 0.34
-22 -16 -1 0.86 0.36
-22 -16 -1 1.1 0.39
-22 16 -1 1.19 0.32
22 16 1 1.9 0.4
22 16 1 1.75 0.79
-24 -16 -1 1.88 0.45
-24 -16 -1 1.31 0.39
-24 16 -1 0.35 0.31
24 16 1 1.38 0.93
-26 -16 -1 1.05 0.39
-26 -16 -1 0.98 0.45
-26 16 -1 0.45 0.37
26 16 1 1.75 0.92
-25 -17 1 2.58 0.44
-25 -17 1 3.08 0.48
25 17 -1 3.42 0.95
25 17 -1 2.68 0.48
-23 -17 1 0.79 0.38
-23 -17 1 1.4 0.41
23 17 -1 1.99 0.9
23 17 -1 2.37 0.48
-23 17 1 0.93 0.28
-21 -17 1 0.88 0.35
-21 -17 1 1.52 0.36
21 17 -1 0.76 0.43
21 17 -1 0.57 0.7
-21 17 1 0.22 0.24
-19 -17 1 4.91 0.42
-19 -17 1 5.56 0.43
-19 17 1 4.71 0.31
19 17 -1 4.89 0.51
-19 17 1 4.42 0.25
19 17 -1 3.58 0.83
-17 -17 1 5.81 0.46
-17 -17 1 7.14 0.53
-17 17 1 5.1 0.35
17 17 -1 5.35 0.49
-17 17 1 5.87 0.25
17 17 -1 4.82 0.82
-15 -17 1 0.08 0.27
-15 -17 1 0.13 0.25
15 17 -1 0.58 0.4
-15 17 1 0.5 0.17
15 17 -1 -0.12 0.54
-15 17 1 0.82 0.11
13 -17 -1 9.21 0.46
-13 -17 1 9.2 0.49
-13 -17 1 9.04 0.47
13 17 -1 5.84 0.71
13 17 -1 7.01 0.56
-13 17 1 7.14 0.35
-13 17 1 7.27 0.28
-11 -17 1 11.98 0.53
-11 -17 1 11.65 0.53
11 -17 -1 11.15 0.51
11 17 -1 11.97 0.95
-11 17 1 12.47 0.66
-11 17 1 12.4 0.47
-11 17 1 12.5 0.43
11 17 -1 12.48 0.72
-11 17 1 12.42 0.43
9 -17 -1 18.75 0.68
-9 -17 1 17.78 0.68
-9 -17 1 17.89 0.68
-9 17 1 13.25 0.67
-9 17 1 13.79 0.5
-9 17 1 14.16 0.46
9 17 -1 12.75 0.84
-9 17 1 14.15 0.47
9 17 -1 14.01 0.68
-7 -17 1 16.76 0.63
-7 -17 1 17.62 0.61
-7 -17 1 17.24 0.63
7 -17 -1 17.96 0.65
-7 17 1 17.57 0.79
-7 17 1 17.13 0.59
-7 17 1 17.41 0.58
7 17 -1 19.22 0.8
7 17 -1 18.46 0.89
5 -17 -1 18.16 0.65
5 -17 -1 17.6 0.63
-5 -17 1 18.19 0.62
-5 -17 1 17.89 0.63
5 17 -1 19.12 0.77
-5 17 1 19.24 0.63
5 17 -1 19.58 0.9
-5 17 1 18.8 0.79
-5 17 1 18.4 0.65
-5 17 1 20.03 0.62
-3 -17 1 19.54 0.72
-3 -17 1 18.82 0.64
3 -17 -1 20.06 0.7
3 -17 -1 19.96 0.66
-3 -17 1 18.8 0.66
-3 -17 1 19.21 0.64
3 17 -1 18.85 0.8
3 17 -1 18.26 0.73
-3 17 1 18.25 0.65
-3 17 1 18.73 0.62
-3 17 1 18.79 0.77
-3 17 1 18.8 0.6
1 -17 -1 16.7 0.53
-1 -17 1 16.39 0.53
1 -17 -1 16.52 0.55
1 -17 -1 16 0.53
-1 -17 1 16.4 0.52
-1 -17 1 15.91 0.57
1 -17 -1 16.16 0.61
-1 -17 1 15.56 0.6
1 17 -1 15.64 0.67
-1 17 1 13.93 0.55
-1 17 1 15.11 0.7
1 17 -1 14.72 0.62
-1 17 1 14.77 0.49
-1 17 1 14.68 0.59
-1 17 1 14.96 0.53
1 -17 1 16.57 0.61
1 -17 1 15.71 0.57
-1 -17 -1 15.79 0.53
-1 -17 -1 16.02 0.55
-1 -17 -1 15.13 0.59
-1 -17 -1 16.21 0.54
1 17 1 11.09 0.45
-1 17 -1 10.88 0.51
1 17 1 10.47 0.47
-1 17 -1 11.27 0.54
1 17 1 10.99 0.5
1 17 1 11.9 0.59
-3 -17 -1 4.62 0.22
-3 -17 -1 4.44 0.33
3 -17 1 4.89 0.33
-3 -17 -1 3.92 0.26
3 -17 1 4.14 0.27
-3 17 -1 1.78 0.25
3 17 1 2.4 0.35
3 17 1 2.17 0.27
-3 17 -1 2.04 0.27
3 17 1 2.44 0.26
5 -17 1 0.66 0.16
-5 -17 -1 0.52 0.16
-5 -17 -1 0.38 0.14
5 -17 1 0.86 0.19
-5 -17 -1 0.7 0.11
-5 17 -1 1.12 0.11
-5 17 -1 1.09 0.25
-5 17 -1 0.91 0.26
5 17 1 0.82 0.23
5 17 1 0.77 0.26
-5 17 -1 1.12 0.11
5 17 1 0.87 0.35
-7 -17 -1 18.95 0.66
7 -17 1 18.77 0.67
-7 -17 -1 18.2 0.69
7 -17 1 19.24 0.7
-7 -17 -1 18.61 0.61
-7 17 -1 13.45 0.43
-7 17 -1 13.63 0.64
7 17 1 13.94 0.83
7 17 1 12.45 0.6
-7 17 -1 12.99 0.43
7 17 1 13.53 0.62
-7 17 -1 13.39 0.56
-9 -17 -1 3.69 0.32
-9 -17 -1 5.08 0.23
-9 -17 -1 4.51 0.38
9 -17 1 5.14 0.32
9 -17 1 5.12 0.34
9 17 1 3.55 0.53
-9 17 -1 3.92 0.15
-9 17 -1 4.05 0.37
9 17 1 3.87 0.35
-11 -17 -1 4.63 0.35
11 -17 1 4.93 0.34
-11 -17 -1 4.37 0.33
11 -17 1 4.67 0.35
-11 17 -1 4.62 0.47
11 17 1 4.44 0.41
11 17 1 3.88 0.58
-11 17 -1 4.02 0.33
13 -17 1 8.28 0.48
-13 -17 -1 8.44 0.5
-13 -17 -1 7.72 0.45
13 17 1 4.03 0.67
-13 17 -1 5.67 0.39
13 17 1 6.09 0.56
-15 -17 -1 4.2 0.34
-15 -17 -1 3.94 0.36
15 17 1 5.03 0.74
-15 17 -1 5.76 0.4
15 17 1 5.81 0.48
-17 -17 -1 3.16 0.37
-17 -17 -1 2.36 0.31
17 17 1 0.65 0.63
17 17 1 1.43 0.38
-17 17 -1 1.2 0.26
-19 -17 -1 4.21 0.39
-19 -17 -1 4.65 0.44
19 17 1 4.01 0.79
-19 17 -1 4.53 0.37
19 17 1 4.82 0.46
-21 -17 -1 6.96 0.52
-21 -17 -1 7.08 0.6
21 17 1 10.51 0.65
21 17 1 7.25 0.98
-21 17 -1 8.37 0.54
-23 -17 -1 1.21 0.4
-23 -17 -1 1.28 0.43
23 17 1 1.32 0.89
-23 17 -1 0.47 0.32
-25 -17 -1 0.58 0.42
-25 -17 -1 0.55 0.39
25 17 1 1.44 0.89
-25 17 -1 0.95 0.36
-24 -18 1 6.28 0.52
-24 -18 1 8.36 0.69
24 18 -1 9.19 0.77
24 18 -1 6.43 1.05
-22 -18 1 0.53 0.38
-22 -18 1 1.19 0.4
22 18 -1 1.29 0.78
22 18 -1 1.35 0.46
-20 -18 1 6.82 0.5
-20 -18 1 7.34 0.6
-20 18 1 3.55 0.31
20 18 -1 3.35 0.81
20 18 -1 5.08 0.54
-18 -18 1 0.33 0.31
-18 -18 1 0.15 0.31
-18 18 1 0.45 0.21
18 18 -1 -0.15 0.6
18 18 -1 0.87 0.38
-16 -18 1 1.89 0.32
-16 -18 1 1.87 0.3
16 18 -1 0.69 0.61
-16 18 1 1.53 0.12
16 18 -1 1.54 0.43
-16 18 1 1.13 0.2
-14 -18 1 0.23 0.26
-14 -18 1 0.5 0.26
-14 18 1 1.29 0.12
14 18 -1 1.41 0.42
14 18 -1 0.56 0.64
-14 18 1 1.6 0.2
12 -18 -1 10.86 0.48
-12 -18 1 10.57 0.53
-12 -18 1 10.67 0.53
-12 18 1 10.16 0.64
-12 18 1 10.74 0.37
-12 18 1 10.74 0.43
12 18 -1 10.91 0.65
12 18 -1 9.53 0.89
-10 -18 1 17.04 0.67
-10 -18 1 16.71 0.66
10 -18 -1 17.47 0.66
-10 18 1 15.74 0.55
-10 18 1 15.74 0.51
-10 18 1 15.43 0.52
10 18 -1 15.44 0.75
-10 18 1 14.53 0.73
10 18 -1 14.3 1
8 -18 -1 3.64 0.28
-8 -18 1 3.82 0.27
-8 -18 1 3.37 0.23
-8 -18 1 2.94 0.25
8 18 -1 3.66 0.52
-8 18 1 4.32 0.21
-8 18 1 4.09 0.44
8 18 -1 4.72 0.42
-8 18 1 4.1 0.23
-8 18 1 3.9 0.25
6 -18 -1 13.46 0.56
-6 -18 1 14.31 0.51
-6 -18 1 13.75 0.53
-6 18 1 12.76 0.46
6 18 -1 12.48 0.62
-6 18 1 11.82 0.62
6 18 -1 11.91 0.73
-6 18 1 11.79 0.42
-6 18 1 11.82 0.45
4 -18 -1 32.32 1.08
-4 -18 1 32.17 1.04
-4 -18 1 32.65 1.05
4 -18 -1 32.41 1.05
-4 -18 1 32.55 1.03
-4 -18 1 31.74 1.1
4 18 -1 36.22 1.32
4 18 -1 34.04 1.23
-4 18 1 35.58 1.11
-4 18 1 35.39 1.1
-4 18 1 36.09 1.29
-4 18 1 33.7 1.13
-2 -18 1 7.28 0.27
-2 -18 1 7.35 0.41
2 -18 -1 6.59 0.36
-2 -18 1 7.63 0.34
-2 -18 1 7.29 0.28
2 -18 -1 6.94 0.31
2 18 -1 9.17 0.55
-2 18 1 8.61 0.31
-2 18 1 8.45 0.57
-2 18 1 8.16 0.4
2 18 -1 9.11 0.48
-2 18 1 8.43 0.36
0 -18 -1 54.92 1.74
0 -18 -1 56.64 1.74
0 -18 -1 57.29 1.8
0 -18 1 56.02 1.81
0 -18 -1 57.54 1.75
0 -18 1 55.4 1.77
0 18 -1 47.13 1.59
0 18 1 49.25 1.53
0 18 1 47.85 1.66
0 18 -1 49.83 1.65
0 18 1 47.03 1.57
0 18 1 46.74 1.54
-2 -18 -1 26.86 0.86
-2 -18 -1 27.22 0.86
2 -18 1 26.51 0.91
-2 -18 -1 26.55 0.87
-2 -18 -1 25.91 0.92
2 -18 1 26.21 0.89
-2 18 -1 20.12 0.81
2 18 1 18.71 0.73
-2 18 -1 18.53 0.74
2 18 1 19.46 0.73
2 18 1 18.69 0.69
2 18 1 19.46 0.84
-4 -18 -1 18.6 0.67
4 -18 1 19.16 0.7
4 -18 1 17.91 0.66
-4 -18 -1 19.77 0.62
4 18 1 14.24 0.66
-4 18 -1 15.82 0.69
4 18 1 15.39 0.76
-4 18 -1 15.01 0.65
4 18 1 14.76 0.65
-6 -18 -1 20.44 0.72
-6 -18 -1 21.16 0.66
-6 -18 -1 20.15 0.7
6 -18 1 19.81 0.73
6 -18 1 18.84 0.71
6 18 1 15.62 0.71
-6 18 -1 15.7 0.66
6 18 1 16.41 0.71
-6 18 -1 16.73 0.7
6 18 1 16.44 0.85
-6 18 -1 16.07 0.54
8 -18 1 8.54 0.45
8 -18 1 8.18 0.4
-8 -18 -1 7.83 0.39
-8 -18 -1 8.18 0.32
-8 -18 -1 8.84 0.44
-8 18 -1 8.3 0.29
8 18 1 8.89 0.55
-8 18 -1 8.6 0.49
-8 18 -1 8.27 0.54
8 18 1 7.93 0.72
-10 -18 -1 19.71 0.65
10 -18 1 19.22 0.74
-10 -18 -1 19.76 0.75
10 -18 1 19.81 0.75
-10 -18 -1 18.91 0.72
-10 18 -1 22.04 0.91
10 18 1 20.23 1.09
10 18 1 22.27 0.9
-12 -18 -1 3.24 0.27
12 -18 1 3.14 0.3
12 -18 1 3.44 0.3
-12 -18 -1 3.1 0.3
12 18 1 2.63 0.59
12 18 1 2.29 0.36
-12 18 -1 2.35 0.38
-12 18 -1 2.21 0.25
-14 -18 -1 3.18 0.33
-14 -18 -1 4.12 0.33
-14 18 -1 4.42 0.32
14 18 1 3.09 0.67
14 18 1 3.98 0.45
-16 -18 -1 4.03 0.35
-16 -18 -1 4.39 0.39
16 18 1 1.19 0.66
-16 18 -1 2.49 0.29
16 18 1 3.06 0.43
-18 -18 -1 0.57 0.31
-18 -18 -1 -0.01 0.32
18 18 1 -0.13 0.64
-18 18 -1 -0.02 0.25
18 18 1 0.47 0.37
-20 -18 -1 5.21 0.49
-20 -18 -1 5.82 0.46
20 18 1 7.19 1.02
-20 18 -1 5.6 0.42
20 18 1 7.79 0.61
-22 -18 -1 2.33 0.45
-22 -18 -1 2.16 0.41
22 18 1 3.47 0.46
22 18 1 2.91 0.93
-22 18 -1 2.64 0.35
-24 -18 -1 -0.11 0.4
-24 -18 -1 0.73 0.42
24 18 1 1.16 0.86
-24 18 -1 -0.1 0.33
-25 -19 1 2.48 0.47
25 19 -1 3.96 1.07
-23 -19 1 10.76 0.74
-23 -19 1 10.44 0.76
23 19 -1 11.29 0.83
23 19 -1 9.39 1.12
-21 -19 1 0.76 0.38
-21 -19 1 0.76 0.4
21 19 -1 0.31 0.74
21 19 -1 0.46 0.45
-19 -19 1 4 0.42
-19 -19 1 3.8 0.43
-19 19 1 1.37 0.27
19 19 -1 0.6 0.68
19 19 -1 2.27 0.47
-17 -19 1 -0.18 0.29
-17 -19 1 -0.47 0.3
17 19 -1 0.46 0.42
-17 19 1 0.05 0.19
17 19 -1 -0.19 0.6
-15 -19 1 1.63 0.31
-15 -19 1 2.45 0.33
-15 19 1 0.64 0.18
-15 19 1 1.27 0.11
15 19 -1 0.87 0.6
15 19 -1 0.61 0.39
13 -19 -1 1.79 0.28
-13 -19 1 1.69 0.28
-13 -19 1 1.43 0.26
13 19 -1 2.49 0.43
-13 19 1 2.78 0.17
-13 19 1 2.33 0.4
-13 19 1 2.77 0.22
13 19 -1 1.51 0.6
-11 -19 1 9.44 0.5
11 -19 -1 8.97 0.48
-11 -19 1 8.58 0.49
-11 19 1 7.22 0.56
11 19 -1 6.46 0.77
-11 19 1 7.98 0.35
11 19 -1 7.54 0.6
-11 19 1 7.63 0.3
-9 -19 1 20.73 0.78
-9 -19 1 21.45 0.78
9 -19 -1 21.83 0.78
-9 -19 1 20.75 0.74
-9 19 1 20.08 0.9
-9 19 1 19.66 0.66
9 19 -1 19.07 1.1
-9 19 1 19.15 0.68
9 19 -1 19.91 0.87
-9 19 1 20.14 0.65
7 -19 -1 13.23 0.56
-7 -19 1 13.14 0.54
-7 -19 1 13.95 0.51
-7 19 1 14.88 0.54
-7 19 1 15.32 0.52
7 19 -1 15.86 0.88
7 19 -1 15.92 0.73
-7 19 1 14.58 0.72
5 -19 -1 21.22 0.74
-5 -19 1 21.4 0.74
-5 -19 1 21.71 0.82
5 -19 -1 21.57 0.78
-5 -19 1 21.48 0.74
5 19 -1 24.58 1.03
-5 19 1 22.3 0.78
-5 19 1 23.91 0.95
-5 19 1 22.69 0.76
5 19 -1 23.59 0.92
3 -19 -1 8.86 0.37
-3 -19 1 8.78 0.35
-3 -19 1 8.56 0.39
3 -19 -1 8.34 0.42
-3 -19 1 8.86 0.33
-3 -19 1 8.67 0.44
3 19 -1 8.69 0.64
-3 19 1 8.36 0.35
-3 19 1 8.19 0.54
-3 19 1 7.75 0.39
3 19 -1 7.62 0.5
1 -19 -1 86.58 2.67
1 -19 -1 88.23 2.67
-1 -19 1 85.91 2.66
1 -19 -1 86.9 2.74
-1 -19 1 89.61 2.75
-1 -19 1 87.82 2.71
1 -19 -1 88.02 2.7
-1 -19 1 85.86 2.66
1 19 -1 69.63 2.26
-1 19 1 68.19 2.24
-1 19 1 67.77 2.2
1 19 -1 71.4 2.32
-1 19 1 71.93 2.33
-1 19 1 70.25 2.18
-1 -19 -1 30.66 0.99
-1 -19 -1 30.44 0.98
1 -19 1 30.94 1.02
-1 -19 -1 31.42 1.06
-1 -19 -1 31.56 1
1 -19 1 30.69 1.05
1 19 1 26.83 0.97
-1 19 -1 27.08 1
1 19 1 27.98 0.94
1 19 1 26.99 0.99
1 19 1 29.42 1.1
-1 19 -1 27.68 1.05
3 -19 1 43.2 1.38
-3 -19 -1 43.79 1.35
3 -19 1 43.12 1.4
-3 -19 -1 42.25 1.37
-3 -19 -1 41.65 1.41
3 19 1 33.89 1.21
-3 19 -1 36.72 1.28
3 19 1 33.52 1.21
-3 19 -1 35.37 1.23
3 19 1 35.79 1.33
5 -19 1 30.8 1.07
-5 -19 -1 30.29 1.04
5 -19 1 31.18 1.04
-5 -19 -1 32.32 1
-5 19 -1 29.79 1.08
5 19 1 28.17 1.05
5 19 1 28.63 1.04
-5 19 -1 28.39 1.03
5 19 1 29.36 1.23
7 -19 1 23.71 0.87
-7 -19 -1 23.48 0.82
-7 -19 -1 24.49 0.78
7 -19 1 24.08 0.83
-7 -19 -1 23.44 0.84
-7 19 -1 23.1 0.89
7 19 1 23.74 0.9
7 19 1 23 1.07
-7 19 -1 22.39 0.74
-7 19 -1 24.09 0.92
9 -19 1 11.73 0.56
9 -19 1 10.98 0.5
-9 -19 -1 11.22 0.42
-9 -19 -1 11.2 0.54
-9 -19 -1 11.96 0.5
-9 19 -1 12.97 0.59
9 19 1 12.39 0.89
9 19 1 12.84 0.64
-9 19 -1 13.28 0.68
-11 -19 -1 0.31 0.13
-11 -19 -1 0.32 0.21
11 -19 1 0.07 0.22
-11 -19 -1 0.37 0.24
11 -19 1 0.44 0.23
11 19 1 0.37 0.36
-11 19 -1 0.22 0.28
-11 19 -1 0.23 0.21
11 19 1 -0.11 0.5
13 -19 1 2.68 0.3
-13 -19 -1 2.84 0.19
-13 -19 -1 2.95 0.32
-13 -19 -1 2.62 0.28
-13 19 -1 3.09 0.42
-13 19 -1 2.7 0.27
13 19 1 3.24 0.45
13 19 1 2.3 0.63
-15 -19 -1 0.94 0.28
-15 -19 -1 0.92 0.31
15 19 1 0.45 0.38
-15 19 -1 0.35 0.24
15 19 1 0.16 0.6
-15 19 -1 0.36 0.33
-17 -19 -1 1.29 0.32
-17 -19 -1 1.19 0.34
17 19 1 1.12 0.41
-17 19 -1 1.02 0.26
17 19 1 0.46 0.67
-19 -19 -1 4.37 0.43
-19 -19 -1 4.43 0.41
19 19 1 3.04 0.88
-19 19 -1 4.31 0.37
19 19 1 4.17 0.48
-21 -19 -1 1.89 0.42
-21 -19 -1 2.24 0.4
21 19 1 2.02 0.88
21 19 1 3.21 0.45
-21 19 -1 1.22 0.31
-23 -19 -1 2.17 0.44
-23 -19 -1 1.14 0.4
-23 19 -1 0.28 0.33
23 19 1 2.06 0.86
-24 -20 1 3.36 0.5
-24 -20 1 3.69 0.5
24 20 -1 2.87 0.95
24 20 -1 4.79 0.58
-22 -20 1 4.32 0.49
-22 -20 1 5.22 0.52
22 20 -1 5.87 0.62
22 20 -1 5.21 1.01
-20 -20 1 0.27 0.38
-20 -20 1 0.97 0.37
20 20 -1 0.97 0.45
20 20 -1 0.72 0.73
-18 -20 1 2.76 0.39
-18 -20 1 2.55 0.38
18 20 -1 1.86 0.49
18 20 -1 0.52 0.67
-16 -20 1 1.08 0.33
-16 -20 1 1.42 0.33
16 20 -1 1.6 0.48
-16 20 1 1.34 0.42
16 20 -1 0.7 0.64
-16 20 1 1.29 0.21
-14 -20 1 4.58 0.37
-14 -20 1 6.41 0.5
14 -20 -1 5.25 0.38
-14 20 1 4.06 0.47
-14 20 1 3.38 0.19
-14 20 1 3.72 0.3
14 20 -1 2.8 0.75
14 20 -1 3.75 0.51
-12 -20 1 5.42 0.43
-12 -20 1 4.3 0.34
12 -20 -1 4.35 0.33
-12 20 1 5.14 0.32
12 20 -1 5.53 0.55
12 20 -1 4.21 0.74
-12 20 1 5.2 0.25
-12 20 1 5.56 0.55
10 -20 -1 6.49 0.4
-10 -20 1 6.7 0.44
-10 -20 1 7.04 0.43
-10 -20 1 7.08 0.35
10 20 -1 7.78 0.62
-10 20 1 7.65 0.32
10 20 -1 6.58 0.71
-10 20 1 8.01 0.64
-10 20 1 7.89 0.35
-8 -20 1 3.9 0.31
8 -20 -1 5.4 0.35
-8 -20 1 3.97 0.29
-8 20 1 2.35 0.19
-8 20 1 2.47 0.19
8 20 -1 2.56 0.4
-8 20 1 2.42 0.2
-8 20 1 2.43 0.38
8 20 -1 2.24 0.52
-6 -20 1 24.66 0.84
-6 -20 1 24.9 0.84
6 -20 -1 24.52 0.88
-6 -20 1 24.37 0.9
-6 20 1 23.14 0.77
-6 20 1 24.73 1.01
-6 20 1 22.42 0.79
6 20 -1 24.44 0.99
6 20 -1 22.67 1.07
-4 -20 1 12.9 0.5
4 -20 -1 12.68 0.53
4 -20 -1 12.59 0.5
-4 -20 1 11.94 0.56
-4 -20 1 13.27 0.48
-4 20 1 8.71 0.42
-4 20 1 9.8 0.38
4 20 -1 8.8 0.56
-4 20 1 9.75 0.59
4 20 -1 9.31 0.66
-2 -20 1 60.8 1.91
2 -20 -1 61.45 1.97
2 -20 -1 61.87 1.94
-2 -20 1 62.33 2
-2 -20 1 63.11 1.95
-2 20 1 48.42 1.54
-2 20 1 50.89 1.73
-2 20 1 47.65 1.57
-2 20 1 47.14 1.61
2 20 -1 47.57 1.64
2 20 -1 50.28 1.74
0 -20 -1 0.92 0.16
0 -20 1 0.92 0.18
0 -20 -1 1.05 0.12
0 -20 1 1 0.23
0 -20 -1 0.87 0.23
0 20 -1 0.1 0.33
0 20 1 0.19 0.23
0 20 1 0.46 0.32
0 20 -1 -0.07 0.3
0 20 1 0.08 0.17
0 20 1 -0.04 0.25
-2 -20 -1 2.62 0.19
-2 -20 -1 3.04 0.23
2 -20 1 2.59 0.22
2 -20 1 3.5 0.31
-2 -20 -1 2.45 0.27
2 20 1 3.74 0.35
2 20 1 4.75 0.48
-2 20 -1 4.26 0.36
-2 20 -1 4.33 0.44
2 20 1 4.08 0.35
4 -20 1 9.23 0.46
-4 -20 -1 9.05 0.42
4 -20 1 10.67 0.45
-4 -20 -1 9.8 0.37
-4 -20 -1 9.35 0.48
4 20 1 12.21 0.62
-4 20 -1 11.87 0.61
-4 20 -1 11.71 0.61
4 20 1 11.08 0.59
4 20 1 11.07 0.79
6 -20 1 21.75 0.81
-6 -20 -1 21.46 0.79
6 -20 1 22.85 0.8
-6 -20 -1 22.49 0.73
-6 20 -1 21.87 0.86
6 20 1 21.67 1.05
6 20 1 22.91 0.92
-6 20 -1 24.24 0.95
-8 -20 -1 18.62 0.68
8 -20 1 19.16 0.71
-8 -20 -1 18.47 0.71
-8 -20 -1 18.4 0.62
8 -20 1 17.14 0.73
-8 20 -1 18.14 0.8
8 20 1 18.02 1.06
8 20 1 18.21 0.78
-8 20 -1 18.1 0.77
10 -20 1 3.72 0.33
-10 -20 -1 3.17 0.27
10 -20 1 3.35 0.32
-10 -20 -1 3.83 0.23
-10 -20 -1 3.57 0.31
-10 20 -1 4.43 0.39
10 20 1 4.36 0.69
-10 20 -1 4.46 0.44
10 20 1 4.91 0.43
-12 -20 -1 5.48 0.38
-12 -20 -1 5.5 0.3
12 -20 1 5.98 0.41
-12 -20 -1 5.05 0.35
12 20 1 4.74 0.7
-12 20 -1 4.71 0.38
-12 20 -1 4.77 0.47
12 20 1 4.24 0.45
-14 -20 -1 1.86 0.32
14 -20 1 1.36 0.29
-14 -20 -1 1.53 0.29
14 20 1 1.25 0.64
-14 20 -1 1.08 0.25
-14 20 -1 1.14 0.39
14 20 1 0.74 0.4
-16 -20 -1 0.71 0.29
-16 -20 -1 1.4 0.35
16 20 1 1.59 0.43
16 20 1 1.08 0.7
-16 20 -1 1.36 0.28
-16 20 -1 1.3 0.43
-18 -20 -1 5.12 0.42
-18 -20 -1 4.84 0.45
18 20 1 4.04 0.49
18 20 1 3.18 0.88
-18 20 -1 3.62 0.34
-20 -20 -1 0.06 0.35
-20 -20 -1 -0.13 0.38
-20 20 -1 -0.26 0.28
20 20 1 0.88 0.83
-22 -20 -1 1.76 0.44
-22 -20 -1 1.41 0.39
22 20 1 2.95 0.7
-22 20 -1 0.54 0.31
22 20 1 1.38 0.93
24 20 1 -0.2 0.83
-23 -21 1 3.13 0.49
-23 -21 1 3.85 0.5
23 21 -1 4.34 0.57
23 21 -1 3.45 1.03
-21 -21 1 3.08 0.46
-21 -21 1 3.27 0.45
21 21 -1 4.48 0.56
21 21 -1 3.49 0.88
-19 -21 1 2.98 0.42
-19 -21 1 2.13 0.37
19 21 -1 1.68 0.73
19 21 -1 2.28 0.46
-19 21 1 1.56 0.49
-17 -21 1 2.57 0.37
-17 -21 1 2.79 0.37
17 21 -1 1.06 0.67
-17 21 1 1.5 0.5
17 21 -1 1.7 0.45
-15 -21 1 1.05 0.32
-15 -21 1 1.17 0.31
-15 21 1 1.18 0.41
15 21 -1 0.89 0.47
15 21 -1 0.63 0.63
-13 -21 1 5.52 0.46
-13 -21 1 4.71 0.37
13 -21 -1 5.28 0.38
-13 21 1 3.06 0.19
13 21 -1 2.92 0.52
-13 21 1 2.42 0.43
-13 21 1 2.86 0.23
13 21 -1 1.64 0.7
-11 -21 1 12.8 0.5
-11 -21 1 12.51 0.6
-11 -21 1 12.44 0.59
11 -21 -1 12.3 0.56
-11 21 1 11.96 0.48
-11 21 1 12.51 0.44
11 21 -1 12.34 0.75
-11 21 1 12.28 0.71
11 21 -1 9.21 1.03
9 -21 -1 2.87 0.3
-9 -21 1 2.68 0.27
-9 -21 1 3.59 0.25
9 21 -1 3.28 0.61
-9 21 1 4.19 0.27
-9 21 1 5.18 0.5
9 21 -1 3.87 0.47
-9 21 1 4.42 0.27
-7 -21 1 3.82 0.27
7 -21 -1 4.11 0.33
-7 -21 1 3.36 0.34
-7 -21 1 3.83 0.31
-7 21 1 2.04 0.21
-7 21 1 2.1 0.17
7 21 -1 1.49 0.5
7 21 -1 1.9 0.39
-7 21 1 2.63 0.39
5 -21 -1 29.9 1.01
-5 -21 1 30.51 1
5 -21 -1 30.9 1.04
-5 -21 1 29.79 0.99
-5 -21 1 29.55 1.08
5 21 -1 26.24 1.04
-5 21 1 26.11 0.86
5 21 -1 27.98 1.2
-5 21 1 26.11 1.06
-5 21 1 24.68 0.88
-3 -21 1 21.4 0.7
-3 -21 1 20.99 0.74
3 -21 -1 21.05 0.74
-3 -21 1 21.11 0.82
3 -21 -1 21.28 0.78
3 21 -1 13.22 0.69
-3 21 1 15.27 0.75
3 21 -1 14.37 0.79
-3 21 1 14.09 0.59
-3 21 1 14.72 0.54
-3 21 1 14.62 0.68
1 -21 -1 6.19 0.32
-1 -21 1 5.85 0.34
-1 -21 1 5.11 0.4
1 -21 -1 6.16 0.42
-1 21 1 3.38 0.29
1 21 -1 2.83 0.41
1 21 -1 3.49 0.37
-1 21 1 3.36 0.42
-1 21 1 3.75 0.37
-1 21 1 3.31 0.25
-1 -21 -1 1.02 0.14
-1 -21 -1 0.75 0.24
-1 -21 -1 1.03 0.16
1 -21 1 0.68 0.19
1 -21 1 1.07 0.25
1 21 1 0.31 0.27
1 21 1 0.09 0.25
-1 21 -1 -0.08 0.28
1 21 1 -0.27 0.38
-1 21 -1 0.09 0.3
-3 -21 -1 12.03 0.49
-3 -21 -1 13.74 0.47
-3 -21 -1 11.99 0.56
3 -21 1 12.08 0.59
3 -21 1 13.24 0.53
3 21 1 14.82 0.81
3 21 1 14.93 0.71
3 21 1 13.52 0.68
-3 21 -1 15.43 0.76
-3 21 -1 13.86 0.67
5 -21 1 1.29 0.26
-5 -21 -1 1.99 0.17
5 -21 1 2.16 0.25
-5 -21 -1 1.83 0.21
-5 -21 -1 1.58 0.29
5 21 1 3.1 0.49
-5 21 -1 3.24 0.4
5 21 1 3.1 0.36
-5 21 -1 3.49 0.35
-7 -21 -1 3.01 0.26
-7 -21 -1 2.62 0.24
7 -21 1 2.54 0.26
7 -21 1 2.78 0.3
-7 -21 -1 2.76 0.22
-7 21 -1 3.36 0.35
7 21 1 3.41 0.6
7 21 1 3.57 0.39
-7 21 -1 4.35 0.44
-9 -21 -1 2.86 0.21
-9 -21 -1 2.56 0.25
9 -21 1 2.89 0.33
9 -21 1 2.63 0.28
-9 -21 -1 3.32 0.3
9 21 1 3.61 0.44
9 21 1 3.73 0.61
-9 21 -1 3.61 0.42
-9 21 -1 3.77 0.4
11 -21 1 8.1 0.48
-11 -21 -1 8.92 0.54
11 -21 1 8.44 0.53
-11 -21 -1 8.76 0.48
-11 21 -1 9.31 0.65
-11 21 -1 8.99 0.46
11 21 1 7.46 0.61
11 21 1 7.71 0.79
-11 21 -1 8.3 0.52
-13 -21 -1 1.05 0.3
13 -21 1 1.18 0.32
-13 -21 -1 0.65 0.26
13 21 1 0.96 0.63
-13 21 -1 1.3 0.25
-13 21 -1 1.7 0.35
-13 21 -1 1.16 0.39
13 21 1 0.54 0.43
-15 -21 -1 2.92 0.37
-15 -21 -1 2.76 0.34
-15 21 -1 1.61 0.27
-15 21 -1 2.05 0.41
15 21 1 0.58 0.68
15 21 1 1.98 0.47
-17 -21 -1 1.62 0.33
-17 -21 -1 1.38 0.36
-17 21 -1 0.04 0.25
17 21 1 1.51 0.44
17 21 1 0.53 0.78
-17 21 -1 0.43 0.42
-19 -21 -1 -0.03 0.37
-19 -21 -1 -0.32 0.34
19 21 1 0.95 0.76
-19 21 -1 -0.48 0.28
-19 21 -1 0.17 0.45
19 21 1 0.32 0.41
-21 -21 -1 1.56 0.43
-21 -21 -1 1.37 0.4
-21 21 -1 0.42 0.31
21 21 1 1.82 0.45
21 21 1 1.14 0.8
-23 -21 -1 0.65 0.44
-23 -21 -1 -0.27 0.4
23 21 1 1.02 0.95
-22 -22 1 4.86 0.52
-22 -22 1 4.81 0.5
-22 22 1 3.08 0.59
22 22 -1 4.06 0.93
22 22 -1 4.61 0.6
-20 -22 1 4.62 0.46
-20 -22 1 5.85 0.51
-20 22 1 4.53 0.61
20 22 -1 4.54 0.97
20 22 -1 5.97 0.62
-18 -22 1 3.52 0.42
-18 -22 1 3.67 0.42
-18 22 1 3.13 0.53
18 22 -1 3.39 0.55
18 22 -1 2.64 0.85
-16 -22 1 1.77 0.35
-16 -22 1 2.57 0.37
16 22 -1 0.92 0.77
16 22 -1 1.97 0.47
-16 22 1 1.8 0.46
-14 -22 1 5.5 0.42
14 -22 -1 5.31 0.38
-14 -22 1 5.57 0.41
-14 -22 1 5.13 0.36
14 22 -1 5.08 0.58
14 22 -1 5.29 0.79
-14 22 1 4.9 0.53
-12 -22 1 1.37 0.29
-12 -22 1 1.42 0.22
12 -22 -1 1.39 0.3
-12 -22 1 1.59 0.28
12 22 -1 0.95 0.43
-12 22 1 1.36 0.15
12 22 -1 1.32 0.68
-12 22 1 0.8 0.42
-10 -22 1 0.72 0.21
-10 -22 1 0.19 0.23
10 -22 -1 0.8 0.25
-10 22 1 0.11 0.15
10 22 -1 -0.17 0.44
-10 22 1 0.18 0.39
10 22 -1 -0.1 0.59
-10 22 1 0.11 0.16
8 -22 -1 11.57 0.57
-8 -22 1 12.14 0.52
-8 -22 1 11.06 0.64
-8 -22 1 11.76 0.5
-8 22 1 11.38 0.68
-8 22 1 10.62 0.44
-8 22 1 10.49 0.44
8 22 -1 10.25 0.87
8 22 -1 10.75 0.7
6 -22 -1 0.75 0.27
-6 -22 1 0.79 0.18
-6 -22 1 0.72 0.19
-6 -22 1 0.74 0.29
-6 22 1 1.73 0.17
-6 22 1 1.61 0.22
6 22 -1 1.39 0.49
-6 22 1 1.86 0.41
6 22 -1 1.61 0.39
-4 -22 1 2.97 0.24
-4 -22 1 2.86 0.34
4 -22 -1 3.06 0.31
-4 -22 1 2.91 0.2
4 -22 -1 2.19 0.24
-4 22 1 1.43 0.32
4 22 -1 1.66 0.38
-4 22 1 2.09 0.24
-4 22 1 2.11 0.43
4 22 -1 1.35 0.43
-4 22 1 1.6 0.19
2 -22 -1 27.97 0.95
-2 -22 1 27.86 1.03
-2 -22 1 28.49 0.96
2 -22 -1 29.6 1.02
-2 -22 1 27.34 0.88
-2 22 1 16.79 0.75
-2 22 1 17.36 0.7
-2 22 1 18.29 0.66
-2 22 1 18.63 0.86
2 22 -1 16.01 0.79
2 22 -1 18.55 0.93
0 -22 -1 3.81 0.32
0 -22 1 3.94 0.27
0 -22 -1 3.36 0.19
0 -22 1 4.02 0.33
0 -22 -1 3.65 0.27
0 22 -1 2.38 0.39
0 22 1 2.03 0.29
0 22 1 2.08 0.41
0 22 1 1.91 0.32
0 22 1 1.83 0.23
0 22 -1 1.58 0.39
-2 -22 -1 0.14 0.15
2 -22 1 -0.24 0.24
-2 -22 -1 -0.05 0.23
-2 -22 -1 0.06 0.14
2 -22 1 0.33 0.21
2 22 1 0.53 0.29
2 22 1 0.88 0.4
2 22 1 0.73 0.33
-2 22 -1 0.28 0.35
-2 22 -1 0.35 0.31
4 -22 1 4.18 0.31
-4 -22 -1 3.93 0.38
4 -22 1 3.72 0.33
-4 -22 -1 4.19 0.26
-4 -22 -1 4.18 0.31
4 22 1 1.81 0.46
-4 22 -1 2.14 0.4
4 22 1 1.95 0.34
-4 22 -1 2.06 0.37
6 -22 1 2.63 0.29
-6 -22 -1 2.99 0.19
-6 -22 -1 2.58 0.25
6 -22 1 2.53 0.31
-6 22 -1 1.01 0.33
6 22 1 1.18 0.34
6 22 1 0.39 0.46
-6 22 -1 0.85 0.34
8 -22 1 1.35 0.27
-8 -22 -1 1.55 0.16
-8 -22 -1 1.51 0.25
8 -22 1 1.49 0.32
-8 -22 -1 1.33 0.23
-8 22 -1 1.73 0.33
-8 22 -1 1.89 0.36
8 22 1 1.06 0.59
8 22 1 1.93 0.38
10 -22 1 6.27 0.48
-10 -22 -1 5.79 0.47
10 -22 1 6.44 0.45
-10 -22 -1 6.4 0.41
-10 22 -1 6.2 0.6
-10 22 -1 6.18 0.5
10 22 1 5.99 0.53
10 22 1 4.61 0.71
12 -22 1 1.88 0.31
-12 -22 -1 1.19 0.27
-12 -22 -1 1.96 0.31
-12 22 -1 1.92 0.27
12 22 1 2.42 0.67
-12 22 -1 2 0.39
12 22 1 1.83 0.47
-12 22 -1 2.51 0.38
-14 -22 -1 3.72 0.4
14 -22 1 3.93 0.4
-14 -22 -1 4.15 0.35
14 22 1 2.93 0.75
-14 22 -1 3.99 0.5
14 22 1 3.26 0.51
-14 22 -1 3.42 0.38
-14 22 -1 3.31 0.32
-16 -22 -1 1.44 0.36
-16 -22 -1 0.81 0.32
16 22 1 0.48 0.43
-16 22 -1 -0.05 0.42
16 22 1 -0.27 0.7
-16 22 -1 0.53 0.27
-16 22 -1 1.02 0.37
-18 -22 -1 0.11 0.35
-18 -22 -1 1.15 0.38
18 22 1 0.52 0.46
-18 22 -1 -0.22 0.27
-18 22 -1 -0.09 0.39
18 22 1 0.33 0.75
-20 -22 -1 4.45 0.47
-20 -22 -1 3.44 0.44
-20 22 -1 2.14 0.56
20 22 1 3.03 0.88
-20 22 -1 3.29 0.51
20 22 1 3.78 0.52
-22 -22 -1 0.71 0.41
-22 -22 -1 0.69 0.4
-22 22 -1 0.44 0.53
22 22 1 1.39 0.85
-21 -23 1 6.73 0.54
-21 -23 1 6.04 0.53
21 23 -1 7.76 0.7
21 23 -1 5.18 1.04
-21 23 1 5.19 0.65
-19 -23 1 5.46 0.5
-19 -23 1 5.12 0.47
-19 23 1 5.26 0.62
19 23 -1 4.56 0.9
19 23 -1 6.56 0.64
-17 -23 1 2.65 0.39
-17 -23 1 2.98 0.39
-17 23 1 2.28 0.55
17 23 -1 1.88 0.76
17 23 -1 2.25 0.55
-15 -23 1 0.12 0.3
-15 -23 1 -0.19 0.3
15 -23 -1 0.19 0.32
-15 23 1 -0.33 0.4
15 23 -1 -0.23 0.65
15 23 -1 -0.42 0.43
-13 -23 1 7.56 0.54
-13 -23 1 8.11 0.43
13 -23 -1 7.52 0.54
-13 -23 1 8.74 0.54
-13 23 1 7.37 0.65
13 23 -1 5.91 0.88
13 23 -1 6.39 0.64
-11 -23 1 2.07 0.29
-11 -23 1 2.17 0.25
11 -23 -1 2.12 0.3
-11 23 1 2.95 0.21
-11 23 1 3.01 0.5
11 23 -1 3.01 0.54
11 23 -1 2.78 0.72
-9 -23 1 1.73 0.35
9 -23 -1 1.83 0.31
-9 -23 1 1.96 0.23
-9 -23 1 1.71 0.25
9 23 -1 0.49 0.41
-9 23 1 1.01 0.39
-9 23 1 0.81 0.18
9 23 -1 0.06 0.61
-7 -23 1 9.59 0.55
-7 -23 1 9.24 0.45
7 -23 -1 9.29 0.49
-7 -23 1 9.68 0.45
-7 23 1 10.4 0.68
-7 23 1 9.53 0.45
7 23 -1 9.55 0.68
7 23 -1 8.79 0.83
-5 -23 1 6.64 0.39
5 -23 -1 6.61 0.47
-5 -23 1 6.94 0.47
-5 -23 1 6.99 0.35
-5 23 1 7.62 0.43
5 23 -1 7.72 0.59
-5 23 1 7.21 0.62
5 23 -1 7.8 0.82
-5 23 1 8.07 0.53
-5 23 1 7.14 0.37
-3 -23 1 10.21 0.39
3 -23 -1 10.73 0.48
-3 -23 1 10.65 0.56
-3 -23 1 10.87 0.47
3 -23 -1 11.69 0.57
3 23 -1 5.41 0.48
-3 23 1 6.47 0.6
-3 23 1 5.13 0.42
-3 23 1 6.05 0.36
3 23 -1 6.23 0.61
-3 23 1 5.81 0.47
-1 -23 1 9.49 0.45
1 -23 -1 8.99 0.53
1 -23 -1 9.46 0.42
-1 -23 1 8.53 0.51
-1 23 1 4.66 0.36
1 23 -1 4.63 0.44
-1 23 1 4.33 0.36
1 23 -1 5.18 0.55
-1 23 1 5.06 0.54
-1 23 1 4.19 0.4
-1 -23 -1 3.33 0.22
-1 -23 -1 3.61 0.36
1 -23 1 3.94 0.28
1 -23 1 3.55 0.34
-1 -23 -1 3.85 0.28
1 23 1 4.41 0.41
-1 23 -1 3.36 0.41
-1 23 -1 4.83 0.51
1 23 1 3.99 0.51
3 -23 1 21.53 0.83
-3 -23 -1 20.19 0.74
-3 -23 -1 21.58 0.73
3 -23 1 22.32 0.79
-3 -23 -1 21.92 0.83
3 23 1 14.64 0.71
-3 23 -1 16.1 0.82
-3 23 -1 13.63 0.71
3 23 1 14.87 0.87
5 -23 1 15.12 0.62
-5 -23 -1 15.03 0.59
-5 -23 -1 14.99 0.54
-5 -23 -1 14.05 0.7
5 -23 1 15.39 0.69
-5 23 -1 8.9 0.58
-5 23 -1 9.52 0.62
5 23 1 8.89 0.86
5 23 1 8.81 0.6
-7 -23 -1 11.76 0.55
7 -23 1 11.83 0.57
7 -23 1 12.63 0.63
-7 -23 -1 11.73 0.45
7 23 1 6.49 0.54
7 23 1 6.8 0.71
-7 23 -1 7.31 0.6
-7 23 -1 7.98 0.58
-9 -23 -1 2.26 0.27
9 -23 1 2.45 0.33
-9 -23 -1 2.09 0.29
9 -23 1 2.58 0.32
9 23 1 3.43 0.44
-9 23 -1 3.46 0.42
-9 23 -1 3.2 0.46
9 23 1 3.33 0.72
11 -23 1 1.4 0.31
11 -23 1 1.99 0.31
-11 -23 -1 1.9 0.3
-11 -23 -1 1.9 0.28
-11 23 -1 1.87 0.35
-11 23 -1 2.19 0.27
-11 23 -1 2.08 0.4
11 23 1 2.08 0.44
11 23 1 1.69 0.65
-13 -23 -1 4.84 0.4
13 -23 1 6.15 0.46
-13 -23 -1 5.28 0.39
-13 23 -1 3.87 0.45
-13 23 -1 4.2 0.5
-13 23 -1 3.93 0.33
13 23 1 3.58 0.83
13 23 1 4.89 0.56
15 -23 1 5.27 0.46
-15 -23 -1 5.26 0.42
-15 -23 -1 5.7 0.45
15 23 1 3.54 0.53
-15 23 -1 3.37 0.43
15 23 1 2.51 0.78
-15 23 -1 4.02 0.53
-15 23 -1 3.9 0.35
-17 -23 -1 3.64 0.4
-17 -23 -1 3.82 0.43
17 23 1 2.33 0.52
17 23 1 2.12 0.9
-17 23 -1 2.7 0.47
-17 23 -1 2.11 0.41
-17 23 -1 1.94 0.31
-19 -23 -1 5.37 0.51
-19 -23 -1 5.94 0.49
19 23 1 4.57 0.55
-19 23 -1 4.42 0.47
-19 23 -1 3.67 0.54
19 23 1 4.2 0.99
-21 -23 -1 2.22 0.44
-21 -23 -1 2.2 0.44
-21 23 -1 2.16 0.45
21 23 1 4.15 0.54
-21 23 -1 2.64 0.59
21 23 1 3.52 1.01
-20 -24 1 5.19 0.5
-20 -24 1 4.66 0.49
20 24 -1 4.7 0.92
-20 24 1 4.5 0.64
20 24 -1 5.24 0.62
-18 -24 1 3.46 0.44
-18 -24 1 3.11 0.42
18 24 -1 2.5 0.57
18 24 -1 1.79 0.87
-18 24 1 1.65 0.51
-16 -24 1 1.33 0.35
-16 -24 1 1.32 0.35
16 24 -1 0.52 0.47
-16 24 1 0.71 0.46
16 24 -1 0.61 0.8
14 -24 -1 1.17 0.32
-14 -24 1 1.7 0.34
-14 -24 1 0.84 0.31
14 24 -1 0.09 0.74
-14 24 1 0.2 0.42
14 24 -1 0.01 0.51
12 -24 -1 3.16 0.34
-12 -24 1 2.46 0.32
-12 -24 1 2.91 0.26
12 24 -1 2.03 0.56
-12 24 1 2.59 0.47
12 24 -1 2.9 0.71
-10 -24 1 2.46 0.4
-10 -24 1 3.61 0.32
-10 -24 1 3.67 0.28
10 -24 -1 3.63 0.36
10 24 -1 4.64 0.59
10 24 -1 3.71 0.69
-10 24 1 4.11 0.51
-8 -24 1 3.64 0.29
8 -24 -1 4.04 0.38
-8 -24 1 3.45 0.39
-8 -24 1 3.86 0.28
-8 24 1 3.49 0.51
8 24 -1 3.68 0.63
8 24 -1 3.1 0.54
-6 -24 1 6.06 0.38
-6 -24 1 5.29 0.34
-6 -24 1 5.49 0.43
6 -24 -1 5.51 0.42
6 24 -1 6.73 0.69
-6 24 1 7.85 0.61
6 24 -1 6.91 0.64
-6 24 1 6.67 0.43
-6 24 1 7.6 0.64
-4 -24 1 5.31 0.41
-4 -24 1 5.36 0.28
4 -24 -1 5.73 0.39
4 -24 -1 4.99 0.38
-4 -24 1 5.97 0.36
-4 24 1 6.17 0.52
4 24 -1 6.04 0.61
-4 24 1 4.82 0.36
4 24 -1 5.5 0.54
-4 24 1 4.81 0.52
-4 24 1 5.7 0.36
-2 -24 1 2.55 0.26
2 -24 -1 2.48 0.24
-2 -24 1 2.92 0.37
2 -24 -1 2.02 0.32
-2 24 1 2.12 0.48
-2 24 1 1.75 0.38
2 24 -1 1.48 0.43
-2 24 1 1.42 0.23
2 24 -1 1.12 0.49
0 -24 1 6.58 0.52
0 -24 -1 6.75 0.36
0 -24 1 6.83 0.41
0 -24 -1 7.19 0.46
0 24 1 3.09 0.39
0 24 -1 3.39 0.46
0 24 -1 3.62 0.48
0 24 1 3.66 0.51
-2 -24 -1 11.42 0.46
-2 -24 -1 10.96 0.43
2 -24 1 11.46 0.58
2 -24 1 11.31 0.52
-2 -24 -1 11.4 0.61
-2 24 -1 9.29 0.61
2 24 1 7.81 0.64
2 24 1 8.72 0.74
-2 24 -1 8.51 0.64
-4 -24 -1 18.17 0.76
-4 -24 -1 18.01 0.67
4 -24 1 19.03 0.73
-4 -24 -1 19.01 0.65
4 -24 1 18.37 0.75
4 24 1 14.77 1
4 24 1 13.76 0.74
-4 24 -1 14.29 0.73
-4 24 -1 15.34 0.79
6 -24 1 10.35 0.51
-6 -24 -1 10.72 0.63
-6 -24 -1 11.01 0.5
6 -24 1 10.72 0.56
6 24 1 7.61 0.61
-6 24 -1 8.36 0.62
-6 24 -1 8.69 0.65
6 24 1 7.61 0.83
-8 -24 -1 1.87 0.27
8 -24 1 1.92 0.31
8 -24 1 2.09 0.36
-8 24 -1 1.27 0.39
8 24 1 0.64 0.57
-8 24 -1 1.41 0.42
8 24 1 1.14 0.44
10 -24 1 9.3 0.55
10 -24 1 8.49 0.52
-10 -24 -1 9.18 0.51
-10 -24 -1 9.75 0.54
-10 24 -1 7.53 0.69
-10 24 -1 7.05 0.56
10 24 1 6.47 0.81
10 24 1 6.79 0.56
12 -24 1 9.95 0.64
-12 -24 -1 10.77 0.62
-12 -24 -1 10.26 0.55
-12 24 -1 8.35 0.71
12 24 1 5.76 0.83
12 24 1 7.72 0.64
-12 24 -1 8.33 0.48
-12 24 -1 8.32 0.66
-14 -24 -1 5.59 0.45
14 -24 1 5.77 0.48
-14 -24 -1 5.31 0.4
-14 24 -1 2.97 0.41
-14 24 -1 2.67 0.5
14 24 1 2.94 0.79
-14 24 -1 3.59 0.34
14 24 1 2.9 0.49
-16 -24 -1 2.62 0.37
-16 -24 -1 2.5 0.39
16 24 1 1.11 0.78
-16 24 -1 2.01 0.49
-16 24 -1 2.36 0.44
16 24 1 1.89 0.53
-18 -24 -1 4.6 0.44
-18 -24 -1 4.48 0.46
18 24 1 3.65 0.9
-18 24 -1 2.75 0.45
18 24 1 3.65 0.56
-18 24 -1 2.86 0.57
-20 -24 -1 4.03 0.47
-20 -24 -1 4.23 0.46
-20 24 -1 4 0.5
20 24 1 3.34 0.92
20 24 1 5.35 0.58
-20 24 -1 3.73 0.57
-19 -25 1 3.85 0.46
-19 -25 1 4.98 0.48
-19 25 1 2.9 0.58
19 25 -1 3.05 0.85
19 25 -1 4.04 0.6
-17 -25 1 2.35 0.42
-17 -25 1 1.43 0.38
17 25 -1 0.84 0.75
17 25 -1 0.91 0.55
-17 25 1 0.36 0.54
-15 -25 1 2.91 0.4
15 -25 -1 3.52 0.41
-15 -25 1 2.49 0.37
-15 25 1 1.41 0.49
15 25 -1 2.1 0.59
15 25 -1 1.5 0.75
-13 -25 1 1.75 0.33
13 -25 -1 2.12 0.36
13 25 -1 1.22 0.56
13 25 -1 1.01 0.69
-13 25 1 2.22 0.48
-11 -25 1 0.7 0.37
-11 -25 1 1.76 0.24
11 -25 -1 1.59 0.33
-11 -25 1 1.33 0.28
11 25 -1 0.26 0.7
-11 25 1 0.04 0.41
11 25 -1 1.19 0.54
-9 -25 1 10.83 0.55
-9 -25 1 12.3 0.72
9 -25 -1 11.92 0.62
-9 -25 1 11.81 0.53
9 25 -1 7.9 0.83
-9 25 1 9.89 0.62
9 25 -1 9.87 0.84
-9 25 1 8.87 0.72
-7 -25 1 14.39 0.58
-7 -25 1 13.2 0.57
7 -25 -1 15.51 0.68
-7 -25 1 13.68 0.74
-7 25 1 12.59 0.69
-7 25 1 12.53 0.86
7 25 -1 13.75 0.81
7 25 -1 11.9 0.97
-5 -25 1 4.56 0.34
-5 -25 1 3.66 0.39
5 -25 -1 4.31 0.38
-5 -25 1 3.58 0.28
5 25 -1 3.51 0.48
5 25 -1 3.41 0.64
-5 25 1 3.14 0.52
-5 25 1 3.6 0.42
3 -25 -1 0.38 0.27
-3 -25 1 0.49 0.31
-3 -25 1 0.41 0.22
3 -25 -1 0.51 0.22
-3 25 1 1.33 0.43
-3 25 1 1.15 0.24
3 25 -1 0.61 0.52
3 25 -1 1.49 0.41
-3 25 1 1.1 0.35
-1 -25 1 1.13 0.24
1 -25 -1 0.9 0.21
-1 -25 1 0.62 0.33
1 -25 -1 0.92 0.29
-1 25 1 -0.01 0.41
-1 25 1 0.38 0.38
1 25 -1 0 0.37
1 25 -1 -0.23 0.4
1 -25 1 6.36 0.47
1 -25 1 6 0.41
-1 -25 -1 5.28 0.42
-1 -25 -1 6.04 0.34
-1 25 -1 3.85 0.53
-1 25 -1 3.66 0.48
1 25 1 3.91 0.55
1 25 1 2.99 0.41
-3 -25 -1 5.01 0.41
-3 -25 -1 5.36 0.32
3 -25 1 5.13 0.4
3 -25 1 5.87 0.45
-3 -25 -1 4.72 0.3
3 25 1 5.25 0.63
-3 25 -1 6.88 0.55
-3 25 -1 5.93 0.58
3 25 1 5.41 0.52
5 -25 1 8.91 0.58
-5 -25 -1 8.55 0.44
5 -25 1 9.21 0.51
-5 -25 -1 9.34 0.55
5 25 1 7 0.61
-5 25 -1 8.4 0.71
-5 25 -1 8 0.6
5 25 1 7.36 0.73
7 -25 1 9.12 0.49
-7 -25 -1 8.67 0.56
-7 -25 -1 8.19 0.47
7 -25 1 8.66 0.54
-7 25 -1 8.61 0.68
7 25 1 8.23 0.9
7 25 1 6.94 0.64
-7 25 -1 9.24 0.66
9 -25 1 15.12 0.72
9 -25 1 16.28 0.76
-9 -25 -1 15.32 0.68
9 25 1 11.35 1.05
-9 25 -1 11.81 0.73
9 25 1 12.03 0.76
-9 25 -1 11.32 0.68
-11 -25 -1 16.72 0.7
-11 -25 -1 16.05 0.73
11 -25 1 16.37 0.79
-11 25 -1 13.11 0.77
11 25 1 11.1 1.12
11 25 1 12.39 0.88
-11 25 -1 12.01 0.58
-11 25 -1 11.77 0.83
-13 -25 -1 4.71 0.4
13 -25 1 4.62 0.45
-13 -25 -1 5.35 0.4
13 25 1 2.58 0.85
-13 25 -1 3.29 0.47
13 25 1 3.52 0.58
-13 25 -1 2.96 0.47
-15 -25 -1 2.3 0.37
15 -25 1 2.77 0.42
-15 -25 -1 2.62 0.36
-15 25 -1 1.97 0.44
15 25 1 1 0.54
-15 25 -1 1.57 0.5
15 25 1 1.24 0.78
-17 -25 -1 2.61 0.39
-17 -25 -1 2.81 0.42
-17 25 -1 1.53 0.51
17 25 1 1.93 0.85
17 25 1 2.85 0.56
-17 25 -1 2.07 0.46
-19 -25 -1 5.32 0.48
-19 -25 -1 6.66 0.53
19 25 1 5.24 0.98
19 25 1 5.91 0.62
-19 25 -1 4.6 0.64
-19 25 -1 4.55 0.51
-18 -26 1 2.69 0.42
-18 -26 1 2.46 0.43
18 26 -1 2.12 0.6
-18 26 1 0.72 0.52
18 26 -1 2.17 0.81
-16 -26 1 3.27 0.42
-16 -26 1 1.41 0.37
-16 26 1 0.85 0.5
16 26 -1 0.96 0.76
16 26 -1 1.23 0.58
-14 -26 1 6.2 0.45
14 -26 -1 6.06 0.49
14 26 -1 3.16 0.81
14 26 -1 5.08 0.68
-14 26 1 4.78 0.64
12 -26 -1 2.84 0.39
-12 -26 1 2.47 0.47
-12 -26 1 2.2 0.33
-12 26 1 2.81 0.56
12 26 -1 2.13 0.6
12 26 -1 1.51 0.72
10 -26 -1 2.58 0.34
-10 -26 1 2 0.44
-10 -26 1 2.03 0.29
-10 26 1 0.95 0.38
10 26 -1 0.77 0.5
10 26 -1 0.8 0.71
-10 26 1 1.02 0.44
8 -26 -1 10.2 0.61
-8 -26 1 10.08 0.62
-8 -26 1 10.32 0.49
-8 -26 1 9.93 0.49
-8 26 1 9.53 0.74
-8 26 1 10.22 0.71
8 26 -1 8.16 0.76
8 26 -1 7.32 0.87
6 -26 -1 6.46 0.46
-6 -26 1 5.71 0.46
-6 -26 1 5.11 0.37
-6 26 1 5.57 0.58
-6 26 1 6.28 0.54
6 26 -1 5.59 0.7
6 26 -1 5.83 0.58
4 -26 -1 14.32 0.69
-4 -26 1 14.22 0.75
-4 -26 1 14.08 0.59
4 26 -1 11.18 0.76
4 26 -1 11.13 0.88
-4 26 1 10.27 0.66
-4 26 1 11.14 0.79
2 -26 -1 2.05 0.26
2 -26 -1 2.06 0.37
-2 -26 1 2.18 0.27
-2 -26 1 2.17 0.38
2 26 -1 0.86 0.41
-2 26 1 0.85 0.38
-2 26 1 1.23 0.46
2 26 -1 1.03 0.53
0 -26 1 0.36 0.31
0 -26 -1 0.67 0.3
0 -26 1 0.11 0.25
0 -26 -1 0.64 0.21
0 26 -1 0.43 0.48
0 26 1 0.34 0.4
0 26 -1 0.41 0.39
0 26 1 1.06 0.46
2 -26 1 2 0.34
-2 -26 -1 1.92 0.22
-2 -26 -1 2.2 0.37
2 -26 1 1.75 0.28
2 26 1 0.93 0.38
-2 26 -1 1.77 0.49
2 26 1 1.44 0.57
-2 26 -1 0.74 0.39
-4 -26 -1 3.08 0.38
4 -26 1 2.71 0.38
4 -26 1 3.39 0.33
-4 -26 -1 2.39 0.24
4 26 1 1.17 0.6
-4 26 -1 1.1 0.4
-4 26 -1 1.57 0.43
4 26 1 1.66 0.45
6 -26 1 3.98 0.36
-6 -26 -1 3.29 0.28
6 -26 1 3.62 0.39
-6 -26 -1 2.95 0.39
6 26 1 2.49 0.62
6 26 1 2.92 0.46
-6 26 -1 3.05 0.5
-6 26 -1 2.93 0.44
-8 -26 -1 8.7 0.51
-8 -26 -1 9.04 0.61
8 -26 1 9.69 0.58
8 -26 1 8.78 0.56
8 26 1 6.85 0.82
8 26 1 7.56 0.63
-8 26 -1 7.35 0.73
-8 26 -1 7.83 0.63
10 -26 1 10.42 0.59
-10 -26 -1 10.14 0.58
10 -26 1 10.19 0.61
10 26 1 8.8 0.94
10 26 1 11.07 0.78
-10 26 -1 9.97 0.72
-10 26 -1 10.98 0.75
-12 -26 -1 4.47 0.39
12 -26 1 4.78 0.43
12 26 1 3.42 0.8
-12 26 -1 3.62 0.5
-12 26 -1 3.56 0.51
12 26 1 4.16 0.61
-14 -26 -1 1.24 0.32
-14 -26 -1 0.81 0.34
14 -26 1 0.16 0.35
-14 26 -1 0.32 0.47
14 26 1 0.18 0.85
14 26 1 0.22 0.52
-14 26 -1 0.44 0.38
-16 -26 -1 0.52 0.34
-16 -26 -1 0.4 0.36
-16 26 -1 -0.32 0.41
16 26 1 0.24 0.78
16 26 1 0.07 0.46
-16 26 -1 -0.3 0.42
-18 -26 -1 6.23 0.49
-18 -26 -1 5.54 0.5
18 26 1 4.39 0.94
18 26 1 6.6 0.65
-18 26 -1 4.03 0.53
-18 26 -1 2.98 0.6
-17 -27 1 0.87 0.38
17 27 -1 0.47 0.58
-17 27 1 -0.5 0.55
17 27 -1 1.19 0.79
15 -27 -1 6.52 0.49
-15 -27 1 5.33 0.45
-15 27 1 4.22 0.66
15 27 -1 4.46 0.67
15 27 -1 3.7 0.87
-13 -27 1 1.38 0.43
13 -27 -1 1.36 0.38
-13 -27 1 0.94 0.32
13 27 -1 0.85 0.75
-13 27 1 0.65 0.49
-13 27 1 0.72 0.41
13 27 -1 1.17 0.6
11 -27 -1 2.21 0.36
-11 -27 1 2.54 0.31
-11 -27 1 2.87 0.5
11 27 -1 1.47 0.54
-11 27 1 1.46 0.42
11 27 -1 1.51 0.72
-11 27 1 2.39 0.56
-9 -27 1 1.01 0.24
9 -27 -1 0.51 0.36
-9 -27 1 1 0.42
-9 27 1 0.9 0.4
9 27 -1 -0.35 0.7
9 27 -1 0 0.56
-9 27 1 0.07 0.44
7 -27 -1 4.89 0.41
-7 -27 1 3.96 0.32
-7 -27 1 4.35 0.49
7 27 -1 2.01 0.52
-7 27 1 2.81 0.52
-7 27 1 2.75 0.44
7 27 -1 2.26 0.66
5 -27 -1 2.22 0.38
-5 -27 1 2.13 0.42
-5 -27 1 1.76 0.27
5 27 -1 0.66 0.47
-5 27 1 1.11 0.4
5 27 -1 0.89 0.57
-5 27 1 1.39 0.48
-3 -27 1 5 0.45
3 -27 -1 5.76 0.43
-3 -27 1 5.53 0.43
-3 27 1 4.16 0.57
3 27 -1 4.14 0.67
-3 27 1 4.07 0.47
3 27 -1 5 0.59
-1 -27 1 5.31 0.41
-1 -27 1 5.14 0.44
1 -27 -1 4.87 0.37
1 -27 -1 5.13 0.42
-1 27 1 3.63 0.56
1 27 -1 2.95 0.48
1 27 -1 3.46 0.61
-1 27 1 3.06 0.45
1 -27 1 1.69 0.28
1 -27 1 2.09 0.39
-1 -27 -1 2.08 0.38
-1 27 -1 1.14 0.51
1 27 1 0.69 0.4
1 27 1 0.76 0.57
-1 27 -1 0.51 0.41
-3 -27 -1 6.83 0.53
3 -27 1 5.84 0.47
3 -27 1 6.68 0.52
-3 27 -1 4.96 0.51
3 27 1 4.96 0.66
-3 27 -1 4.47 0.54
3 27 1 4.31 0.5
5 -27 1 7.38 0.54
5 -27 1 7.23 0.51
-5 -27 -1 7.22 0.56
-5 27 -1 6.1 0.61
-5 27 -1 5.25 0.52
5 27 1 5.1 0.71
5 27 1 5.25 0.53
7 -27 1 1.8 0.34
-7 -27 -1 1.34 0.41
7 -27 1 1.48 0.35
-7 -27 -1 1.39 0.25
7 27 1 1.65 0.66
7 27 1 1.43 0.51
-7 27 -1 1.97 0.44
-7 27 -1 1.13 0.43
9 -27 1 1.21 0.36
-9 -27 -1 1.16 0.28
9 -27 1 1.94 0.36
-9 -27 -1 1.26 0.39
9 27 1 1.64 0.54
9 27 1 1.91 0.72
-9 27 -1 1.84 0.5
-9 27 -1 1.2 0.47
-11 -27 -1 0.98 0.31
11 -27 1 1.51 0.39
-11 27 -1 0.79 0.48
11 27 1 1.52 0.57
-11 27 -1 1.61 0.46
11 27 1 1.05 0.74
-13 -27 -1 -0.02 0.31
13 -27 1 0.79 0.4
-13 27 -1 0.84 0.46
13 27 1 0.19 0.84
13 27 1 0.15 0.49
-13 27 -1 0.31 0.49
15 -27 1 2.05 0.45
-15 -27 -1 1.3 0.37
-15 -27 -1 2.71 0.37
15 27 1 1.61 0.84
-15 27 -1 1.99 0.56
-15 27 -1 1.39 0.48
15 27 1 1.3 0.59
17 27 1 4.03 1.04
-17 27 -1 4.68 0.65
-17 27 -1 4.25 0.56
16 28 -1 1.17 0.8
-16 28 1 0.8 0.6
-14 -28 1 6.97 0.64
-14 -28 1 6.2 0.46
14 -28 -1 8.15 0.64
14 28 -1 5.45 0.92
-14 28 1 4.89 0.65
-14 28 1 6.66 0.61
14 28 -1 5.56 0.73
-12 -28 1 0.04 0.28
12 -28 -1 0.41 0.33
-12 -28 1 0.07 0.41
12 28 -1 0.72 0.55
-12 28 1 0.87 0.46
-12 28 1 0.34 0.48
12 28 -1 0.08 0.72
10 -28 -1 5.83 0.48
-10 -28 1 5.01 0.48
-10 -28 1 5.93 0.56
-10 28 1 4.1 0.5
-10 28 1 3.76 0.58
10 28 -1 4.27 0.68
10 28 -1 2.84 0.77
8 -28 -1 5.72 0.48
-8 -28 1 4.96 0.5
-8 28 1 3.22 0.55
-8 28 1 4.79 0.55
8 28 -1 2.97 0.64
8 28 -1 1.7 0.78
6 -28 -1 11.15 0.62
-6 -28 1 11.19 0.58
-6 -28 1 11.32 0.68
6 28 -1 8.94 0.74
6 28 -1 8.05 0.88
-6 28 1 9.55 0.76
-6 28 1 7.55 0.78
-4 -28 1 6.24 0.45
4 -28 -1 6.4 0.48
-4 -28 1 5.81 0.5
-4 28 1 4.34 0.49
-4 28 1 4.98 0.61
4 28 -1 3.74 0.6
4 28 -1 4.12 0.72
2 -28 -1 7.79 0.56
-2 -28 1 8.07 0.5
-2 -28 1 8.81 0.65
2 28 -1 5.17 0.66
2 28 -1 5.37 0.57
-2 28 1 6.21 0.58
-2 28 1 6.18 0.7
0 -28 1 8.15 0.64
0 -28 1 6.83 0.47
0 -28 -1 6.72 0.53
0 28 -1 4.43 0.54
0 28 1 5.1 0.56
0 28 1 5.25 0.66
0 28 -1 5.23 0.68
2 -28 1 3.42 0.35
2 -28 1 3.78 0.42
-2 -28 -1 3.66 0.41
2 28 1 2.68 0.47
-2 28 -1 2.97 0.53
2 28 1 2.34 0.6
-2 28 -1 2.45 0.52
-4 -28 -1 4.71 0.46
4 -28 1 6.89 0.52
4 -28 1 5.92 0.42
4 28 1 4.55 0.75
-4 28 -1 2.91 0.52
-4 28 -1 3.74 0.5
4 28 1 3.8 0.5
6 -28 1 2.21 0.35
6 -28 1 1.38 0.37
-6 -28 -1 1.4 0.43
6 28 1 1.49 0.47
-6 28 -1 1.7 0.47
6 28 1 1.44 0.66
-6 28 -1 1.34 0.44
8 -28 1 0.27 0.37
-8 -28 -1 0.23 0.42
8 -28 1 0.15 0.34
-8 -28 -1 0.01 0.25
8 28 1 -0.04 0.53
-8 28 -1 -0.22 0.46
-8 28 -1 -0.04 0.48
8 28 1 -0.28 0.66
10 -28 1 0.95 0.42
-10 -28 -1 0.67 0.29
-10 -28 -1 1.15 0.41
-10 28 -1 0.77 0.43
10 28 1 0.57 0.56
10 28 1 0.96 0.82
-10 28 -1 1.08 0.5
12 -28 1 0.91 0.41
-12 -28 -1 0.51 0.32
12 28 1 0.17 0.58
-12 28 -1 0.37 0.47
-12 28 -1 0.42 0.5
12 28 1 -0.02 0.75
-14 -28 -1 2.2 0.38
14 -28 1 2.44 0.42
-14 28 -1 1.55 0.5
14 28 1 2.52 0.63
-14 28 -1 1.76 0.57
14 28 1 1.15 0.83
-13 -29 1 3.06 0.5
-13 -29 1 2.33 0.36
13 -29 -1 3.14 0.44
13 29 -1 1.91 0.6
-13 29 1 2.51 0.55
13 29 -1 1.99 0.92
-13 29 1 1.62 0.61
11 -29 -1 1.99 0.42
-11 -29 1 1.42 0.44
-11 29 1 0.81 0.58
-11 29 1 0.96 0.5
11 29 -1 1.67 0.85
11 29 -1 1.84 0.66
9 -29 -1 12.06 0.72
-9 -29 1 11.6 0.73
-9 29 1 9.83 0.83
9 29 -1 10.09 1.05
-9 29 1 8.45 0.85
9 29 -1 11.11 0.85
-7 -29 1 10.88 0.7
7 -29 -1 10.78 0.69
-7 29 1 8.29 0.7
-7 29 1 8.6 0.92
7 29 -1 8.87 0.78
7 29 -1 6.97 0.85
-5 -29 1 9.27 0.66
5 -29 -1 8.93 0.65
5 29 -1 5.06 0.75
-5 29 1 6.08 0.56
-5 29 1 6.82 0.68
5 29 -1 6.2 0.64
-3 -29 1 7.9 0.58
-3 -29 1 7.33 0.5
3 -29 -1 8.04 0.63
-3 29 1 4.86 0.53
3 29 -1 5.3 0.77
-3 29 1 5.91 0.71
3 29 -1 5.42 0.65
-1 -29 1 4.39 0.46
-1 -29 1 3.79 0.35
1 -29 -1 4.56 0.44
-1 29 1 2.65 0.6
1 29 -1 2.73 0.64
-1 29 1 3.43 0.5
1 29 -1 3.49 0.58
1 -29 1 3.03 0.43
-1 -29 -1 3.72 0.45
1 -29 1 3.74 0.36
-1 29 -1 2.12 0.55
1 29 1 1.44 0.59
-1 29 -1 2.27 0.55
1 29 1 1.72 0.47
-3 -29 -1 4.25 0.48
3 -29 1 3.94 0.44
3 -29 1 3.69 0.36
-3 29 -1 2.4 0.53
3 29 1 2.58 0.54
3 29 1 2.33 0.72
-3 29 -1 2.39 0.5
5 -29 1 2.12 0.44
5 -29 1 2.44 0.36
-5 -29 -1 2.68 0.42
-5 29 -1 2.1 0.5
5 29 1 2.74 0.57
5 29 1 2.45 0.76
-5 29 -1 2.33 0.49
7 -29 1 0.85 0.35
7 -29 1 1.01 0.37
-7 -29 -1 0.27 0.38
7 29 1 0.33 0.55
-7 29 -1 -0.5 0.43
-7 29 -1 0.57 0.51
7 29 1 0.23 0.66
-9 -29 -1 -0.64 0.43
9 -29 1 0.45 0.33
9 -29 1 -0.31 0.4
9 29 1 -0.62 0.49
9 29 1 0.35 0.73
-9 29 -1 0.34 0.51
-9 29 -1 -0.64 0.42
-11 -29 -1 1.14 0.49
-11 -29 -1 1.79 0.33
11 -29 1 1.46 0.4
-11 29 -1 1.64 0.56
-11 29 -1 1.82 0.47
11 29 1 0.13 0.76
11 29 1 0.94 0.54
-13 -29 -1 2.3 0.49
13 -29 1 2.55 0.47
-13 -29 -1 2.77 0.39
-13 29 -1 2.56 0.55
13 29 1 2.75 0.89
-13 29 -1 3.05 0.6
13 29 1 2.1 0.58
12 -30 -1 2.41 0.45
-12 -30 1 1.73 0.47
-12 30 1 1.55 0.54
12 30 -1 1.52 0.8
-12 30 1 0.94 0.55
12 30 -1 0.81 0.66
-10 -30 1 6.57 0.57
10 -30 -1 6 0.53
10 30 -1 5.27 0.75
10 30 -1 4.16 0.85
-10 30 1 6.04 0.63
-10 30 1 5.15 0.67
-8 -30 1 12.53 0.78
8 -30 -1 13.98 0.77
-8 30 1 10.12 0.86
8 30 -1 10.72 0.86
-8 30 1 11.04 1.01
8 30 -1 10.79 1.14
6 -30 -1 7.89 0.57
-6 -30 1 8.56 0.64
6 30 -1 4.62 0.65
-6 30 1 7.12 0.63
6 30 -1 4.62 0.79
-6 30 1 6.05 0.73
-4 -30 1 9.17 0.75
4 -30 -1 10.24 0.63
4 30 -1 7.18 0.73
-4 30 1 7.49 0.65
-4 30 1 6.99 0.78
4 30 -1 6.52 0.85
2 -30 -1 4.39 0.49
-2 -30 1 4.3 0.51
-2 -30 1 3.84 0.4
-2 30 1 3.36 0.51
2 30 -1 3.3 0.72
2 30 -1 3.19 0.62
-2 30 1 3.97 0.64
0 -30 1 3.29 0.49
0 -30 -1 2.51 0.45
0 -30 1 2.76 0.35
0 30 -1 2.05 0.57
0 30 -1 1.49 0.63
0 30 1 2.48 0.54
0 30 1 1.82 0.61
2 -30 1 4.55 0.39
2 -30 1 4.29 0.46
-2 -30 -1 4.76 0.5
2 30 1 1.71 0.71
-2 30 -1 3.16 0.65
2 30 1 3.35 0.53
-2 30 -1 3.03 0.54
4 -30 1 4.2 0.5
4 -30 1 4.1 0.41
-4 -30 -1 4.45 0.51
-4 30 -1 3.74 0.59
-4 30 -1 3.54 0.54
4 30 1 3.47 0.59
4 30 1 3.16 0.78
6 -30 1 3.4 0.4
-6 -30 -1 3.05 0.49
6 -30 1 3.5 0.48
-6 30 -1 1.76 0.57
6 30 1 1.39 0.53
6 30 1 1.32 0.78
-6 30 -1 2.2 0.51
8 -30 1 1.54 0.41
-8 -30 -1 0.83 0.41
8 -30 1 0.72 0.37
8 30 1 0.86 0.59
-8 30 -1 0.32 0.53
8 30 1 0.25 0.72
-8 30 -1 0.39 0.51
10 -30 1 2.81 0.49
-10 -30 -1 2.26 0.5
10 30 1 1.87 0.63
10 30 1 0.58 0.78
-10 30 -1 1.92 0.56
-10 30 -1 1.83 0.58
12 -30 1 5.66 0.54
-12 -30 -1 5.29 0.56
-12 30 -1 5.3 0.64
12 30 1 5.11 1.04
9 -31 -1 4.19 0.48
-9 -31 1 5.17 0.55
-9 31 1 4.11 0.72
-9 31 1 4.94 0.62
9 31 -1 3.28 0.91
9 31 -1 4.25 0.73
-7 -31 1 2.18 0.47
7 -31 -1 2.26 0.4
-7 31 1 2.02 0.59
7 31 -1 1.81 0.61
7 31 -1 2.02 0.75
-7 31 1 2.08 0.51
5 -31 -1 3.71 0.49
-5 -31 1 3.37 0.52
-5 31 1 3.98 0.6
5 31 -1 2.97 0.68
5 31 -1 2.46 0.72
-5 31 1 3.09 0.64
3 -31 -1 4.36 0.46
-3 -31 1 4.41 0.54
3 31 -1 3.22 0.71
3 31 -1 4.22 0.67
-3 31 1 3.47 0.54
-3 31 1 3.46 0.65
-1 -31 1 2.05 0.44
1 -31 -1 2.15 0.45
-1 31 1 1.87 0.55
1 31 -1 1.18 0.61
1 31 -1 1.83 0.6
-1 31 1 2.07 0.7
1 -31 1 4.61 0.4
1 -31 1 5.56 0.56
-1 -31 -1 4.58 0.48
1 31 1 2.77 0.68
-1 31 -1 3.42 0.57
-1 31 -1 2.88 0.67
1 31 1 2.99 0.54
3 -31 1 5.38 0.44
-3 -31 -1 5.79 0.56
3 -31 1 6.01 0.56
3 31 1 3.45 0.74
-3 31 -1 3.1 0.56
-3 31 -1 2.99 0.67
3 31 1 3.92 0.62
5 -31 1 10.81 0.76
5 -31 1 9.63 0.67
-5 -31 -1 10.36 0.71
-5 31 -1 7.19 0.65
5 31 1 5.72 0.85
5 31 1 6.45 0.66
-5 31 -1 7.51 0.81
7 -31 1 5.1 0.55
-7 -31 -1 5.21 0.58
7 -31 1 5.57 0.48
-7 31 -1 4.56 0.63
7 31 1 4.07 0.67
-7 31 -1 4.33 0.64
7 31 1 4.77 0.94
9 -31 1 1.99 0.47
-9 -31 -1 1.24 0.46
9 31 1 0.59 0.89
-9 31 -1 0.46 0.55
-9 31 -1 0.29 0.53
9 31 1 0.48 0.56
6 -32 -1 0.61 0.43
-6 -32 1 0.8 0.44
6 32 -1 -0.2 0.69
-6 32 1 -0.66 0.62
6 32 -1 -0.21 0.57
-6 32 1 0.19 0.49
4 -32 -1 1.13 0.44
-4 -32 1 0.73 0.47
4 32 -1 0.58 0.68
-4 32 1 0.9 0.5
-4 32 1 0.3 0.65
4 32 -1 0.41 0.64
-2 -32 1 1.82 0.49
2 -32 -1 1.95 0.48
2 32 -1 1.05 0.62
-2 32 1 1.68 0.71
2 32 -1 2.09 0.76
-2 32 1 1.36 0.51
0 -32 -1 2.21 0.49
0 -32 1 2.58 0.46
0 32 -1 0.91 0.69
0 32 -1 1.01 0.55
0 32 1 1.58 0.66
0 32 1 1.73 0.52
2 -32 1 7.43 0.62
-2 -32 -1 7.44 0.6
2 32 1 5.28 0.87
-2 32 -1 5.18 0.71
-2 32 -1 4.94 0.63
2 32 1 5.48 0.68
4 -32 1 9.69 0.62
4 -32 1 10.04 0.77
-4 -32 -1 8.82 0.66
4 32 1 6.72 0.67
4 32 1 5.64 0.85
-4 32 -1 5.91 0.65
-4 32 -1 6.71 0.79
-6 -32 -1 7.21 0.63
6 -32 1 7.06 0.61
-6 32 -1 4.25 0.72
6 32 1 4.46 0.93
6 32 1 4.93 0.71
-6 32 -1 4.9 0.65
-30 0 2 2.71 0.4
-30 0 2 1.99 0.4
-28 0 2 0.09 0.34
-28 0 2 0.41 0.34
-26 0 2 1.28 0.32
-26 0 2 2.52 0.35
-24 0 2 18.3 0.77
-24 0 2 18.19 0.76
-22 0 2 1.04 0.24
-22 0 2 1.29 0.26
-20 0 2 2.17 0.25
-20 0 2 1.81 0.24
-18 0 2 8.47 0.42
18 0 -2 7.55 0.43
-18 0 2 8.27 0.4
-16 0 2 51.27 1.63
-16 0 2 51.5 1.63
16 0 -2 50.76 1.67
-14 0 2 4.28 0.24
14 0 -2 3.78 0.32
-14 0 2 4.48 0.27
-12 0 2 24.35 0.82
-12 0 2 25.71 0.82
12 0 -2 24.97 0.85
10 0 -2 23.37 0.79
-10 0 2 23.82 0.75
10 0 -2 22.82 0.75
-10 0 2 22.49 0.76
-8 0 2 20.23 0.74
8 0 -2 21.62 0.74
8 0 -2 22.58 0.7
8 0 -2 22.49 0.71
-8 0 2 22.81 0.71
-8 0 2 22.32 0.71
6 0 -2 89.96 2.68
-6 0 2 86.84 2.71
-6 0 2 85.81 2.68
6 0 -2 85.21 2.7
-6 0 2 86.11 2.67
6 0 -2 91.13 2.67
4 0 -2 216.14 6.47
-4 0 2 210.46 6.49
4 0 -2 214.24 6.48
-4 0 2 218.12 6.51
-4 0 2 207.23 6.46
4 0 -2 197.35 6.44
2 0 -2 254.53 7.68
-2 0 2 254.12 7.59
2 0 -2 242.09 7.63
-2 0 2 254.35 7.68
2 0 -2 246.64 7.71
-2 0 2 246.64 7.71
0 0 -2 187.67 5.96
0 0 2 198.95 5.97
0 0 2 193.08 6
0 0 -2 187.46 5.94
0 0 2 200.88 5.99
0 0 2 193.71 5.94
0 0 -2 196.66 5.92
-2 0 -2 450.28 13.85
2 0 2 434.03 13.82
2 0 2 458.8 13.89
2 0 2 450.53 13.82
-2 0 -2 451.94 13.84
2 0 2 474.55 13.95
-4 0 -2 107.08 3.3
4 0 2 103.97 3.29
-4 0 -2 113.69 3.3
-4 0 -2 103.49 3.26
4 0 2 111.3 3.31
4 0 2 107.37 3.3
-4 0 -2 106.1 3.29
4 0 2 97.8 3.3
-4 0 -2 108.89 3.26
6 0 2 0.64 0.09
-6 0 -2 0.57 0.08
6 0 2 0.46 0.17
-6 0 -2 0.59 0.06
-6 0 -2 0.61 0.15
-6 0 -2 0.37 0.1
6 0 2 0.52 0.06
-6 0 -2 0.66 0.07
-8 0 -2 7.55 0.28
8 0 2 7.59 0.3
-8 0 -2 6.9 0.3
-8 0 -2 7.34 0.26
-8 0 -2 6.74 0.4
8 0 2 6.45 0.44
10 0 2 77.87 2.42
-10 0 -2 77.59 2.42
-10 0 -2 78.99 2.41
-10 0 -2 76.81 2.38
-12 0 -2 0.14 0.09
-12 0 -2 0.37 0.12
-12 0 -2 0.27 0.12
-12 0 -2 0.27 0.13
-14 0 -2 5.75 0.26
-14 0 -2 6.26 0.3
-14 0 -2 5.73 0.3
-14 0 -2 5.52 0.34
-16 0 -2 3.42 0.23
-16 0 -2 3.58 0.28
-16 0 -2 3.56 0.28
-18 0 -2 27.9 0.98
-18 0 -2 27.91 0.96
-20 0 -2 1.65 0.3
-20 0 -2 1.27 0.24
-22 0 -2 28.47 1.06
-22 0 -2 27.97 1.02
-24 0 -2 4.13 0.35
-24 0 -2 4.06 0.42
-26 0 -2 2.83 0.44
-26 0 -2 3.4 0.37
-28 0 -2 1.06 0.36
-28 0 -2 1.08 0.41
-29 -1 2 2.23 0.39
-29 -1 2 2.24 0.4
-29 1 2 1.72 0.38
-29 1 2 3.1 0.41
-27 -1 2 0.01 0.32
-27 -1 2 0.52 0.31
-27 1 2 0.51 0.32
-27 1 2 0.78 0.32
-25 -1 2 3.3 0.35
-25 -1 2 3.43 0.35
-25 1 2 3.77 0.34
-25 1 2 3.88 0.36
-23 -1 2 3.97 0.35
-23 -1 2 4.96 0.37
-23 1 2 6.72 0.46
-23 1 2 6.62 0.48
-21 -1 2 7.14 0.45
-21 -1 2 6.89 0.44
-21 1 2 7.21 0.44
21 1 -2 7.42 0.5
-21 1 2 7.98 0.45
-19 -1 2 12.56 0.55
-19 -1 2 12.91 0.55
-19 1 2 14.27 0.57
19 1 -2 14.3 0.63
-19 1 2 13.53 0.57
-17 -1 2 8.83 0.4
-17 -1 2 9.54 0.44
-17 1 2 10.3 0.44
-17 1 2 9.61 0.44
17 1 -2 9.98 0.47
15 -1 -2 35.23 1.2
-15 -1 2 35.5 1.16
-15 -1 2 37.36 1.18
-15 1 2 38.84 1.27
-15 1 2 39.34 1.26
15 1 -2 39.75 1.31
13 -1 -2 3.66 0.26
-13 -1 2 3.93 0.24
-13 -1 2 3.8 0.25
-13 1 2 5.51 0.28
-13 1 2 6.27 0.28
13 1 -2 5.79 0.35
11 -1 -2 80.15 2.42
-11 -1 2 80.03 2.43
11 -1 -2 78.38 2.46
-11 -1 2 75.3 2.42
-11 1 2 68.51 2.13
11 1 -2 68.6 2.17
-11 1 2 69.71 2.14
-9 -1 2 51.39 1.65
9 -1 -2 52.69 1.67
-9 -1 2 52.81 1.65
9 -1 -2 54.39 1.64
9 -1 -2 53.96 1.64
-9 1 2 58.13 1.79
-9 1 2 57.33 1.8
9 1 -2 59 1.8
9 1 -2 57.71 1.83
-7 -1 2 18.37 0.59
7 -1 -2 18.62 0.58
7 -1 -2 18.21 0.61
-7 -1 2 17.67 0.62
7 -1 -2 18.05 0.58
-7 -1 2 17.21 0.69
-7 1 2 23.83 0.76
-7 1 2 23.83 0.76
-7 1 2 23.64 0.79
7 1 -2 24.41 0.76
7 1 -2 24.41 0.76
-5 -1 2 111.93 3.65
-5 -1 2 122.36 3.65
5 -1 -2 117.77 3.69
5 -1 -2 122.02 3.64
-5 -1 2 118.52 3.64
5 -1 -2 118.57 3.63
5 1 -2 132.09 3.96
-5 1 2 126.72 3.97
5 1 -2 133.65 3.95
-5 1 2 128.93 4
5 1 -2 126.95 3.97
-5 1 2 128.35 3.99
-3 -1 2 167.23 5.17
-3 -1 2 167.39 5.19
3 -1 -2 169.52 5.18
3 -1 -2 172.88 5.27
-3 -1 2 178.47 5.24
3 -1 -2 161.3 5.17
-3 1 2 178.17 5.5
3 1 -2 182.38 5.47
3 1 -2 175.93 5.56
-3 1 2 178.69 5.48
-3 1 2 175.99 5.43
-1 -1 2 235.41 7.4
-1 -1 2 249.61 7.39
1 -1 -2 232.33 7.39
-1 -1 2 243.89 7.33
-1 1 2 206.86 6.44
1 1 -2 209.97 6.51
-1 1 2 202.06 6.43
1 1 -2 210.23 6.46
1 1 -2 214.39 6.41
-1 1 2 216.37 6.51
1 -1 2 30.43 0.95
1 -1 2 32.39 0.96
1 -1 2 30.29 0.95
-1 -1 -2 30.41 0.96
1 -1 2 29 0.95
-1 -1 -2 31.79 0.96
1 1 2 33.57 1.05
1 1 2 33.85 1.05
-1 1 -2 35.28 1.05
1 1 2 33.92 1.06
-1 1 -2 34.49 1.04
-1 1 -2 33.39 1.04
1 1 2 34.1 1.06
-1 1 -2 33.27 1.05
-1 1 -2 33.36 1.05
3 -1 2 263.36 7.59
-3 -1 -2 250.7 7.59
-3 -1 -2 262.77 7.75
3 -1 2 235.16 7.59
-3 -1 -2 254.17 7.64
3 -1 2 241.7 7.71
3 -1 2 238.4 7.63
3 -1 2 240.44 7.59
-3 -1 -2 249.64 7.62
-3 1 -2 245.2 7.56
-3 1 -2 251.46 7.53
-3 1 -2 249.14 7.53
-3 1 -2 241.84 7.58
3 1 2 243.14 7.54
3 1 2 247.76 7.59
-3 1 -2 238.18 7.51
3 1 2 249.96 7.72
3 1 2 242.96 7.49
3 1 2 243.79 7.5
-3 1 -2 249.66 7.51
-5 -1 -2 42.1 1.27
-5 -1 -2 37.54 1.21
5 -1 2 37.84 1.2
-5 -1 -2 39.57 1.21
5 -1 2 40.62 1.27
5 -1 2 36.74 1.2
-5 -1 -2 38.7 1.2
-5 -1 -2 37.62 1.19
-5 1 -2 42.4 1.34
5 1 2 42.34 1.31
-5 1 -2 41.99 1.39
-5 1 -2 44.7 1.32
5 1 2 43.96 1.33
-5 1 -2 42.92 1.32
-5 1 -2 42.36 1.32
5 1 2 44.41 1.33
5 1 2 40.17 1.4
-7 -1 -2 88.08 2.84
-7 -1 -2 92.43 2.92
7 -1 2 91.64 2.83
-7 -1 -2 94.83 2.84
-7 -1 -2 94.33 2.84
-7 -1 -2 95.68 2.82
7 -1 2 90.47 2.84
-7 1 -2 111.01 3.33
7 1 2 110.61 3.35
-7 1 -2 106.03 3.42
-7 1 -2 116.42 3.33
7 1 2 100.27 3.43
7 1 2 109.83 3.34
-7 1 -2 109.34 3.33
-7 1 -2 108.51 3.35
-9 -1 -2 64.08 1.9
-9 -1 -2 59.17 1.9
-9 -1 -2 60.18 1.86
9 -1 2 60.65 1.9
-9 -1 -2 61.02 1.88
-9 1 -2 75.19 2.23
-9 1 -2 70.45 2.2
-9 1 -2 68.86 2.24
-9 1 -2 74.63 2.22
9 1 2 75.13 2.38
-9 1 -2 68.53 2.28
-9 1 -2 68.01 2.33
9 1 2 75.95 2.25
-11 -1 -2 26.38 0.85
-11 -1 -2 26.55 0.85
-11 -1 -2 25.21 0.81
-11 -1 -2 25.59 0.86
11 1 2 34.45 1.25
-11 1 -2 32.97 1.03
-11 1 -2 31.32 1
-11 1 -2 30.6 1.04
11 1 2 30.91 1.06
-13 -1 -2 26.11 0.85
-13 -1 -2 27.01 0.91
-13 -1 -2 27.25 0.89
-13 -1 -2 27.39 0.89
-13 1 -2 26.9 0.87
-13 1 -2 26.01 0.85
-13 1 -2 26.5 0.9
-13 1 -2 27.33 0.88
-15 -1 -2 14.15 0.5
-15 -1 -2 15.14 0.54
-15 -1 -2 14.21 0.56
-15 1 -2 16.93 0.59
-15 1 -2 15.79 0.55
-15 1 -2 16.85 0.59
-15 1 -2 15.42 0.61
-17 -1 -2 19.82 0.73
-17 -1 -2 17.95 0.65
-17 -1 -2 19.93 0.71
-17 1 -2 21.09 0.71
-17 1 -2 18.42 0.66
-17 1 -2 19.52 0.73
-19 -1 -2 0.95 0.25
-19 -1 -2 0.38 0.22
-19 1 -2 0.73 0.24
-19 1 -2 0.55 0.2
-21 -1 -2 9.02 0.5
-21 -1 -2 8.98 0.55
-21 1 -2 10.36 0.52
-21 1 -2 9.89 0.58
-23 -1 -2 6.53 0.51
-23 -1 -2 7.67 0.56
-23 1 -2 7.14 0.57
-23 1 -2 7.38 0.49
-25 -1 -2 3.22 0.36
-25 -1 -2 4.07 0.43
-25 1 -2 4.08 0.43
-25 1 -2 3.61 0.35
-27 -1 -2 1.86 0.36
-27 -1 -2 1.14 0.38
-27 1 -2 1.22 0.32
-27 1 -2 1.84 0.43
-29 -1 -2 5.68 0.49
-29 -1 -2 6.39 0.55
-29 1 -2 8.91 0.74
-30 -2 2 1.39 0.41
-30 -2 2 0.95 0.39
-30 2 2 1.19 0.38
-30 2 2 0.41 0.36
-28 -2 2 6.96 0.5
-28 -2 2 4.87 0.46
-28 2 2 4.85 0.42
-28 2 2 4.09 0.4
-26 -2 2 2.83 0.37
-26 -2 2 3.71 0.4
-26 2 2 4.04 0.38
-26 2 2 3.65 0.37
-24 -2 2 5.89 0.42
-24 -2 2 5.85 0.45
-24 2 2 8.08 0.5
-24 2 2 7.42 0.51
-22 -2 2 16.69 0.72
-22 -2 2 18.11 0.72
-22 2 2 19 0.75
-22 2 2 19.74 0.75
22 2 -2 19.2 0.81
-20 -2 2 19.14 0.73
-20 -2 2 19.2 0.75
-20 2 2 17.95 0.68
-20 2 2 18.19 0.69
20 2 -2 18.19 0.73
-18 -2 2 20.47 0.76
-18 -2 2 20.83 0.75
18 2 -2 19.12 0.76
-18 2 2 19.56 0.71
-18 2 2 18.93 0.7
-16 -2 2 18.42 0.68
-16 -2 2 18.77 0.67
16 2 -2 20.19 0.76
-16 2 2 19.67 0.7
-16 2 2 19.2 0.69
-14 -2 2 71.97 2.25
-14 -2 2 70.63 2.26
14 -2 -2 74.03 2.25
14 2 -2 68.17 2.19
-14 2 2 69.64 2.14
-14 2 2 68.12 2.14
-12 -2 2 17.7 0.61
12 -2 -2 17.66 0.64
-12 -2 2 17.06 0.6
12 -2 -2 17.68 0.58
12 2 -2 17.59 0.65
-12 2 2 17.76 0.6
-12 2 2 17.82 0.61
10 -2 -2 172.53 5.53
10 -2 -2 192.79 5.52
10 -2 -2 182.37 5.5
-10 -2 2 175.32 5.55
-10 -2 2 178.96 5.51
-10 2 2 181.68 5.53
-10 2 2 181.56 5.55
10 2 -2 176.45 5.53
-8 -2 2 44.84 1.58
-8 -2 2 48.86 1.54
-8 -2 2 48.28 1.47
8 -2 -2 47.68 1.46
8 -2 -2 47.02 1.46
8 -2 -2 46.14 1.49
-8 2 2 33.94 1.1
8 2 -2 36.5 1.11
-8 2 2 34.35 1.11
8 2 -2 37.13 1.11
8 2 -2 35.12 1.16
6 -2 -2 57.46 1.77
-6 -2 2 55.16 1.83
-6 -2 2 56.17 1.75
-6 -2 2 55.99 1.78
6 -2 -2 56.88 1.74
6 -2 -2 57.33 1.74
-6 -2 2 57.12 1.74
-6 2 2 55.73 1.75
6 2 -2 54.8 1.79
6 2 -2 59.14 1.75
-6 2 2 57.39 1.75
-6 2 2 56.45 1.78
6 2 -2 58.31 1.76
4 -2 -2 128.81 3.91
4 -2 -2 124.97 3.95
-4 -2 2 129.93 3.94
4 -2 -2 128.03 3.89
-4 -2 2 129.89 3.91
-4 -2 2 123.78 3.91
-4 -2 2 127.36 3.94
4 2 -2 135.42 4.1
-4 2 2 133.96 4.09
4 2 -2 132.09 4.11
-4 2 2 130.66 4.12
4 2 -2 138.17 4.11
-4 2 2 135.37 4.11
-4 2 2 131.32 4.08
0 -2 2 171.33 5.07
0 -2 2 166.08 5.03
0 -2 -2 167.46 5.11
0 -2 -2 162.05 4.99
0 -2 2 162.65 5.08
0 -2 -2 155.44 5.01
0 2 2 198.95 6.06
0 2 -2 198.18 5.94
0 2 2 188.76 5.94
0 2 2 186.74 5.94
0 2 2 191.06 5.98
0 2 -2 202.15 5.96
0 2 -2 190.76 5.99
-2 -2 -2 20.37 0.64
-2 -2 -2 20.73 0.65
2 -2 2 19.41 0.64
2 -2 2 19.77 0.64
2 -2 2 21.69 0.65
2 -2 2 19.79 0.64
2 -2 2 20.1 0.64
-2 -2 -2 21.93 0.67
-2 -2 -2 20.34 0.65
2 2 2 19.33 0.59
2 2 2 19.48 0.64
2 2 2 19.87 0.62
2 2 2 19.24 0.61
-2 2 -2 19.34 0.61
-2 2 -2 20.29 0.61
-2 2 -2 19.41 0.6
-2 2 -2 18.88 0.61
-2 2 -2 18.24 0.62
4 -2 2 189.18 5.94
-4 -2 -2 194.66 5.9
-4 -2 -2 184.8 5.94
4 -2 2 190.42 5.9
4 -2 2 189.55 5.94
-4 -2 -2 213.22 6.09
-4 -2 -2 191.9 5.91
-4 -2 -2 192.15 5.97
-4 2 -2 179.62 5.51
4 2 2 174.79 5.5
4 2 2 177.57 5.53
4 2 2 184 5.57
4 2 2 181.63 5.55
-4 2 -2 187.34 5.53
-4 2 -2 181.54 5.53
-4 2 -2 191.82 5.55
-4 2 -2 162.63 5.61
-4 2 -2 181.48 5.55
-6 -2 -2 40.43 1.23
-6 -2 -2 38.98 1.25
-6 -2 -2 38.72 1.26
-6 -2 -2 41.42 1.25
6 -2 2 40.51 1.24
-6 -2 -2 42.8 1.33
6 -2 2 38.45 1.25
-6 2 -2 35.4 1.1
-6 2 -2 37.81 1.1
-6 2 -2 35.75 1.11
6 2 2 36.3 1.12
6 2 2 33.45 1.22
6 2 2 35.69 1.09
-6 2 -2 35.5 1.13
-6 2 -2 35.49 1.09
6 2 2 36.17 1.12
-6 2 -2 33.58 1.18
-8 -2 -2 90.91 2.76
8 -2 2 85.75 2.75
8 -2 2 90.6 2.75
-8 -2 -2 85.49 2.76
-8 -2 -2 94.61 2.87
-8 -2 -2 90.74 2.74
-8 2 -2 104.21 3.06
-8 2 -2 98.79 3.05
-8 2 -2 101.19 3.09
8 2 2 92.82 3.2
-8 2 -2 92.78 3.16
8 2 2 100.61 3.09
-8 2 -2 103.21 3.07
-8 2 -2 107.18 3.07
8 2 2 100.08 3.06
-10 -2 -2 37.94 1.18
-10 -2 -2 39.17 1.21
-10 -2 -2 37.95 1.17
-10 -2 -2 37.03 1.2
-10 -2 -2 37.12 1.21
10 2 2 46.83 1.45
10 2 2 47.01 1.67
-10 2 -2 50.03 1.48
10 2 2 48.35 1.51
-10 2 -2 46.73 1.46
-10 2 -2 44.72 1.5
-12 -2 -2 35.41 1.14
-12 -2 -2 37.26 1.17
-12 -2 -2 33.78 1.15
-12 -2 -2 35.36 1.11
-12 2 -2 37.7 1.21
12 2 2 38.95 1.2
-12 2 -2 37.34 1.25
-12 2 -2 38.04 1.22
-12 2 -2 40.22 1.23
12 2 2 39.84 1.47
-14 -2 -2 15.2 0.58
-14 -2 -2 15.96 0.56
-14 -2 -2 14.69 0.51
14 2 2 14.99 0.5
-14 2 -2 14.24 0.56
-14 2 -2 15.27 0.54
14 2 2 16.86 0.85
-14 2 -2 14.68 0.51
-14 2 -2 14.5 0.53
-16 -2 -2 40.08 1.3
-16 -2 -2 38.98 1.26
-16 -2 -2 40.58 1.32
-16 2 -2 39.43 1.26
-16 2 -2 40.44 1.29
-16 2 -2 40.84 1.28
-16 2 -2 38.55 1.31
-18 -2 -2 2.4 0.28
-18 -2 -2 1.84 0.24
-18 2 -2 4.01 0.32
-18 2 -2 3.68 0.3
-20 -2 -2 12.06 0.57
-20 -2 -2 12.29 0.6
-20 2 -2 12.89 0.58
-20 2 -2 12.36 0.55
-22 -2 -2 0.89 0.29
-22 -2 -2 1.02 0.28
-22 2 -2 1.94 0.34
-22 2 -2 2.26 0.27
-24 -2 -2 4.02 0.37
-24 -2 -2 4.23 0.43
-24 2 -2 3.9 0.33
-24 2 -2 3.54 0.4
-26 -2 -2 1.52 0.37
-26 -2 -2 1.24 0.34
-26 2 -2 1.75 0.3
-26 2 -2 1.11 0.36
-28 -2 -2 5.13 0.47
-28 -2 -2 5.3 0.52
-28 2 -2 3.21 0.44
-29 -3 2 0.92 0.38
-29 -3 2 1.37 0.38
-29 3 2 0.93 0.35
-29 3 2 1.25 0.35
-27 -3 2 2.69 0.37
-27 -3 2 3.01 0.37
-27 3 2 3.02 0.36
-27 3 2 3.47 0.38
-25 -3 2 5.83 0.44
-25 -3 2 7.84 0.55
-25 3 2 8.99 0.55
-25 3 2 8.67 0.54
-23 -3 2 20.34 0.79
-23 -3 2 20.2 0.82
-23 3 2 19.78 0.79
23 3 -2 21.08 0.85
-23 3 2 20.16 0.77
-21 -3 2 32.51 1.15
-21 -3 2 33.33 1.13
21 3 -2 32.32 1.16
-21 3 2 32.85 1.11
-21 3 2 31.6 1.09
-19 -3 2 20.62 0.77
-19 -3 2 20.82 0.78
-19 3 2 18.36 0.68
19 3 -2 17.66 0.72
-19 3 2 17.64 0.67
-17 -3 2 22.29 0.82
-17 -3 2 23.25 0.81
-17 3 2 21.43 0.76
-17 3 2 22.82 0.76
17 3 -2 21.07 0.83
-15 -3 2 54.71 1.72
-15 -3 2 52.07 1.73
15 -3 -2 56.14 1.7
-15 3 2 57.78 1.8
15 3 -2 57.89 1.86
-15 3 2 56.06 1.79
-13 -3 2 56.87 1.83
-13 -3 2 57.37 1.82
13 -3 -2 59.61 1.8
-13 3 2 54.31 1.71
-13 3 2 54.92 1.71
-11 -3 2 73.6 2.33
-11 -3 2 72.77 2.32
11 -3 -2 78.27 2.31
-11 3 2 78.91 2.43
11 3 -2 78.22 2.49
-11 3 2 79.79 2.44
9 -3 -2 21.78 0.67
-9 -3 2 20.35 0.69
9 -3 -2 20.55 0.67
-9 -3 2 20.4 0.68
9 3 -2 24.81 0.88
-9 3 2 25.96 0.82
-9 3 2 26.47 0.82
7 -3 -2 9.74 0.33
-7 -3 2 9.84 0.35
-7 -3 2 9.61 0.48
-7 -3 2 9.58 0.35
7 -3 -2 10.05 0.34
-7 -3 2 10.28 0.4
-7 3 2 4.57 0.22
-7 3 2 5.04 0.18
-7 3 2 5.12 0.2
7 3 -2 4.94 0.29
-7 3 2 4.95 0.19
7 3 -2 4.83 0.19
7 3 -2 5.12 0.2
5 -3 -2 159.32 4.8
-5 -3 2 160.58 4.82
-5 -3 2 145.33 4.82
-5 -3 2 159.56 4.79
5 -3 -2 157.02 4.78
-5 -3 2 155.22 4.84
5 3 -2 150.19 4.68
-5 3 2 150.31 4.58
-5 3 2 146.42 4.57
5 3 -2 151.41 4.56
5 3 -2 158.35 4.64
-5 3 2 144.92 4.57
-5 3 2 145.65 4.61
5 3 -2 150.72 4.61
-3 -3 2 771.65 23.21
-3 -3 2 730.33 23.33
-3 -3 2 753.65 23.21
-3 -3 2 791.02 23.32
3 3 -2 735.86 22.65
3 3 -2 717.25 22.55
3 3 -2 755.72 22.43
-3 3 2 734.91 22.52
-1 -3 2 341.52 10.71
-1 -3 2 347.73 10.74
1 -3 -2 351.19 10.75
1 -3 -2 354.1 10.78
-1 -3 2 360.35 10.76
-1 3 2 356.12 11.03
1 3 -2 349.66 10.98
1 3 -2 362.02 10.91
-1 3 2 350.53 10.95
1 3 -2 355.25 10.94
1 3 -2 363.89 10.9
-1 3 2 357.89 10.93
-1 -3 -2 638.5 19.19
1 -3 2 645.36 19.18
-1 -3 -2 621.47 19.13
1 -3 2 603.82 19.08
-1 -3 -2 628.7 19.26
-1 3 -2 578.88 17.53
1 3 2 577.89 17.51
1 3 2 585.13 17.63
1 3 2 564.95 17.46
-1 3 -2 554.97 17.43
-3 -3 -2 122.27 3.73
-3 -3 -2 123.78 3.77
3 -3 2 121.01 3.76
3 -3 2 120.49 3.77
3 -3 2 120.01 3.77
3 -3 2 122.73 3.76
3 -3 2 120.88 3.77
-3 -3 -2 129.58 3.82
-3 -3 -2 119.93 3.77
3 3 2 119.22 3.66
3 3 2 115.68 3.64
-3 3 -2 119.61 3.69
-3 3 -2 115.88 3.64
-3 3 -2 120.02 3.63
3 3 2 117.06 3.62
3 3 2 126.57 3.66
-3 3 -2 117.83 3.62
-3 3 -2 115.21 3.61
-5 -3 -2 277.98 8.18
-5 -3 -2 300.22 8.32
-5 -3 -2 253.84 8.14
5 -3 2 248.09 8.18
-5 -3 -2 273.46 8.23
-5 -3 -2 263.21 8.14
5 -3 2 253.45 8.17
-5 3 -2 231.17 7.19
5 3 2 237.26 7.24
5 3 2 240.18 7.16
-5 3 -2 231.2 7.15
-5 3 -2 232.53 7.13
5 3 2 239.8 7.2
-5 3 -2 237.45 7.15
-5 3 -2 229.31 7.19
-5 3 -2 232.45 7.16
5 3 2 224.7 7.16
5 3 2 237.11 7.31
-7 -3 -2 54.38 1.69
7 -3 2 55.93 1.71
-7 -3 -2 60.1 1.81
-7 -3 -2 55.22 1.72
-7 -3 -2 52.68 1.71
7 -3 2 53.39 1.7
7 3 2 64.46 2.02
7 3 2 66.83 2.02
-7 3 -2 67.12 1.99
7 3 2 65.04 1.99
-7 3 -2 64.34 2.08
7 3 2 59.29 2.12
-7 3 -2 66.7 2
-7 3 -2 67.01 2
-7 3 -2 63.35 2.02
9 -3 2 62.98 2.01
-9 -3 -2 64.8 2.03
-9 -3 -2 66.31 2
9 -3 2 63.43 2.02
-9 -3 -2 67.09 2
-9 -3 -2 63.06 2.03
-9 -3 -2 69.23 2.04
-9 3 -2 57.14 1.99
-9 3 -2 59.88 1.86
-9 3 -2 66.16 1.88
-9 3 -2 61.41 1.9
9 3 2 60.81 1.91
-9 3 -2 62.3 1.87
9 3 2 61.05 1.87
9 3 2 56 2.04
-11 -3 -2 20.46 0.64
-11 -3 -2 20.54 0.64
-11 -3 -2 19.75 0.68
-11 -3 -2 18.64 0.68
-11 3 -2 16.27 0.58
11 3 2 16.01 0.53
11 3 2 16.81 0.62
11 3 2 14.54 0.77
-11 3 -2 16.53 0.54
-11 3 -2 15.66 0.52
-13 -3 -2 4.13 0.27
-13 -3 -2 4.1 0.27
-13 -3 -2 3.82 0.2
13 3 2 6.32 0.26
13 3 2 6.16 0.57
-13 3 -2 6.49 0.33
-13 3 -2 6.45 0.29
-13 3 -2 6.27 0.27
-13 3 -2 6.85 0.29
-15 -3 -2 24.77 0.82
-15 -3 -2 26.33 0.87
-15 -3 -2 24.69 0.87
15 3 2 26.59 1.19
-15 3 -2 23.87 0.8
15 3 2 23.43 0.79
-15 3 -2 24.55 0.81
-15 3 -2 24.05 0.81
-15 3 -2 24.03 0.85
-17 -3 -2 6.53 0.41
-17 -3 -2 5.91 0.29
-17 -3 -2 7.19 0.42
-17 3 -2 9.24 0.41
-17 3 -2 9.69 0.38
-17 3 -2 8.8 0.45
-17 3 -2 9.27 0.41
-19 -3 -2 3.76 0.31
-19 -3 -2 4.54 0.32
-19 3 -2 2.83 0.31
-19 3 -2 3.2 0.25
-21 -3 -2 1.27 0.3
-21 -3 -2 0.78 0.27
-21 3 -2 0.88 0.22
-21 3 -2 0.62 0.27
-23 -3 -2 4.73 0.38
-23 -3 -2 4.28 0.39
-23 3 -2 5.44 0.42
-23 3 -2 5.82 0.43
-25 -3 -2 1.75 0.34
-25 -3 -2 2.05 0.39
-25 3 -2 2.24 0.3
-25 3 -2 2.31 0.39
-27 -3 -2 1.35 0.41
-27 -3 -2 1.15 0.37
-27 3 -2 0.06 0.4
-29 -3 -2 2.69 0.42
-29 -3 -2 1.78 0.42
-29 3 -2 2.41 0.47
-30 -4 2 0.42 0.39
-30 -4 2 2.01 0.43
-30 4 2 0.56 0.37
-28 -4 2 0.74 0.36
-28 -4 2 0.83 0.38
-28 4 2 0.68 0.33
-28 4 2 1.4 0.34
-26 -4 2 0.67 0.32
-26 -4 2 1.24 0.34
-26 4 2 0.91 0.29
26 4 -2 0.74 0.35
-26 4 2 0.76 0.29
-24 -4 2 8.53 0.56
-24 -4 2 7.76 0.55
24 4 -2 10.35 0.64
-24 4 2 9.76 0.54
-24 4 2 10.03 0.54
-22 -4 2 17.65 0.77
-22 -4 2 18.6 0.75
22 4 -2 17.18 0.76
-22 4 2 16.6 0.68
-22 4 2 16.73 0.68
-20 -4 2 12.65 0.55
-20 -4 2 12.82 0.59
-20 4 2 13.71 0.58
-20 4 2 13.81 0.57
20 4 -2 14.66 0.66
-18 -4 2 22.43 0.78
-18 -4 2 20.61 0.79
18 4 -2 19.43 0.77
-18 4 2 19.14 0.69
-18 4 2 18.33 0.69
-16 -4 2 56.03 1.85
-16 -4 2 58.31 1.84
16 -4 -2 59.21 1.8
-16 4 2 59.38 1.86
16 4 -2 59.39 1.93
-16 4 2 58.42 1.86
14 -4 -2 10.13 0.37
-14 -4 2 10.26 0.41
-14 -4 2 9.67 0.43
14 4 -2 12.74 0.58
-14 4 2 13.36 0.49
-14 4 2 13.83 0.49
-12 -4 2 50.6 1.62
12 -4 -2 52.97 1.59
-12 -4 2 50.19 1.61
12 4 -2 44.38 1.49
-12 4 2 45.24 1.42
-12 4 2 46.22 1.42
10 -4 -2 19.23 0.64
-10 -4 2 20.03 0.66
-10 -4 2 18.7 0.65
10 -4 -2 19.57 0.62
10 4 -2 20.5 0.78
-10 4 2 22.76 0.71
-10 4 2 22.36 0.7
-10 4 2 21.87 0.71
-8 -4 2 6.49 0.27
8 -4 -2 6.13 0.24
-8 -4 2 5.9 0.4
-8 -4 2 6.06 0.25
8 -4 -2 6.26 0.23
8 4 -2 11.05 0.55
-8 4 2 11.26 0.36
-8 4 2 10.53 0.37
8 4 -2 10.16 0.46
-8 4 2 10.52 0.36
-6 -4 2 15.96 0.52
6 -4 -2 15.99 0.5
6 -4 -2 15.79 0.5
-6 -4 2 15.87 0.51
-6 -4 2 15.14 0.55
-6 -4 2 14.48 0.62
6 4 -2 18.73 0.58
-6 4 2 17.9 0.56
-6 4 2 17.76 0.58
6 4 -2 18.1 0.71
-6 4 2 17.87 0.56
-6 4 2 16.87 0.6
6 4 -2 19.06 0.59
6 4 -2 17.62 0.63
4 -4 -2 209.69 6.26
-4 -4 2 210.68 6.34
-4 -4 2 198.73 6.29
-4 -4 2 206.2 6.27
4 -4 -2 201.98 6.26
4 -4 -2 207.48 6.3
-4 -4 2 202.28 6.32
-4 4 2 176.23 5.39
4 4 -2 172.55 5.42
4 4 -2 181.06 5.36
-4 4 2 173.05 5.33
-4 4 2 179.11 5.33
4 4 -2 165.54 5.37
-2 -4 2 456.9 14.2
-2 -4 2 443.84 14.11
-2 -4 2 473.85 14.12
-2 -4 2 470.19 14.22
2 -4 -2 465.99 14.12
-2 4 2 415.52 12.59
2 4 -2 418.23 12.72
2 4 -2 431.12 12.61
-2 4 2 400.95 12.64
2 4 -2 388.12 12.7
2 4 -2 414.94 12.57
0 -4 2 245.26 7.46
0 -4 -2 236.94 7.54
0 -4 2 241.74 7.44
0 -4 -2 238.04 7.43
0 -4 -2 246.3 7.44
0 -4 2 244.17 7.48
0 -4 2 252.49 7.5
0 4 2 276.7 8.68
0 4 -2 280.75 8.53
0 4 -2 287.48 8.54
0 4 2 276.06 8.54
0 4 -2 280.13 8.52
0 4 2 271.15 8.57
0 4 -2 274.4 8.54
2 -4 2 38.32 1.24
-2 -4 -2 39.02 1.23
2 -4 2 41.43 1.24
2 -4 2 37.97 1.22
-2 -4 -2 40.84 1.27
-2 -4 -2 41.17 1.24
2 -4 2 40.13 1.23
-2 -4 -2 41.56 1.25
2 -4 2 40.49 1.24
2 4 2 46 1.39
2 4 2 43.97 1.36
-2 4 -2 44.39 1.37
-2 4 -2 45.13 1.39
-2 4 -2 44.49 1.38
-2 4 -2 45.54 1.38
2 4 2 45.73 1.43
2 4 2 44.13 1.39
-4 -4 -2 310.17 9.58
-4 -4 -2 334.51 9.74
-4 -4 -2 308.39 9.47
-4 -4 -2 306.95 9.58
4 -4 2 306.29 9.53
-4 -4 -2 320.76 9.56
4 -4 2 306.88 9.52
4 -4 2 300.83 9.58
-4 4 -2 288.83 9.06
4 4 2 300.24 9.29
-4 4 -2 304.12 9.12
4 4 2 289.2 9.07
-4 4 -2 294.35 9.09
-4 4 -2 295.71 9.07
4 4 2 306.33 9.11
4 4 2 290.07 9.14
-4 4 -2 302.06 9.06
-6 -4 -2 334.39 10.01
6 -4 2 316.69 9.97
-6 -4 -2 334.8 9.96
-6 -4 -2 316.02 9.97
-6 -4 -2 315.53 9.88
6 -4 2 299.02 9.92
-6 -4 -2 355.89 10.1
-6 4 -2 289.74 8.96
-6 4 -2 291.66 8.96
-6 4 -2 289.8 8.99
6 4 2 301.87 9.03
6 4 2 284.14 8.99
6 4 2 301.32 9.14
-6 4 -2 288.72 9
6 4 2 304.71 8.99
-6 4 -2 286.13 8.96
6 4 2 295.45 9.03
-8 -4 -2 9.34 0.3
-8 -4 -2 8.91 0.36
-8 -4 -2 8.95 0.35
-8 -4 -2 9.61 0.36
8 -4 2 9.09 0.33
8 -4 2 9.02 0.33
-8 4 -2 7.66 0.35
8 4 2 8.28 0.53
-8 4 -2 9.78 0.31
8 4 2 9.13 0.37
8 4 2 9.56 0.33
-8 4 -2 8.51 0.31
-8 4 -2 9.04 0.45
10 -4 2 88.43 2.72
-10 -4 -2 86.24 2.73
-10 -4 -2 88.51 2.73
-10 -4 -2 90.6 2.7
-10 -4 -2 88.01 2.7
10 4 2 65.99 2.45
-10 4 -2 75.93 2.26
10 4 2 77.37 2.32
-10 4 -2 73.48 2.26
-10 4 -2 74.87 2.3
10 4 2 73.54 2.27
-12 -4 -2 1.11 0.11
-12 -4 -2 1.19 0.17
-12 -4 -2 1.08 0.16
-12 4 -2 0.06 0.14
12 4 2 0.43 0.11
12 4 2 0.78 0.21
12 4 2 0.01 0.31
-12 4 -2 0.35 0.1
-12 4 -2 0.16 0.09
-14 -4 -2 13.88 0.49
-14 -4 -2 14.45 0.56
-14 -4 -2 14.57 0.55
-14 4 -2 9.4 0.37
-14 4 -2 9.75 0.37
14 4 2 8.41 0.69
-14 4 -2 8.91 0.35
-14 4 -2 9.59 0.44
14 4 2 9.04 0.36
-16 -4 -2 8.99 0.44
-16 -4 -2 9.91 0.44
-16 -4 -2 8.13 0.35
-16 4 -2 12.93 0.48
-16 4 -2 12.08 0.53
16 4 2 12.25 0.87
-16 4 -2 12.32 0.48
16 4 2 12.29 0.46
-16 4 -2 12.68 0.47
-18 -4 -2 5.71 0.39
-18 -4 -2 5.71 0.4
-18 4 -2 4.86 0.4
18 4 2 4.54 0.27
-18 4 -2 4.27 0.32
-20 -4 -2 -0.12 0.24
-20 -4 -2 0.34 0.27
-20 4 -2 0.7 0.2
-20 4 -2 0.87 0.26
-22 -4 -2 12.21 0.65
-22 -4 -2 12.83 0.66
-22 4 -2 12.61 0.65
-22 4 -2 12.16 0.56
-24 -4 -2 6.97 0.55
-24 -4 -2 7.28 0.59
-24 4 -2 6.86 0.47
-24 4 -2 7.83 0.61
-26 -4 -2 0.94 0.36
-26 -4 -2 0.93 0.36
-26 4 -2 0.17 0.36
-28 -4 -2 0.09 0.38
-28 -4 -2 0.66 0.4
-28 4 -2 0 0.4
-29 -5 2 2.31 0.41
-29 -5 2 1.34 0.4
-27 -5 2 0.37 0.35
-27 -5 2 0.86 0.36
-27 5 2 0.3 0.29
-27 5 2 0.51 0.31
27 5 -2 0.42 0.35
-25 -5 2 0.67 0.3
-25 -5 2 0.27 0.32
-25 5 2 -0.1 0.25
-25 5 2 0.19 0.27
25 5 -2 0.02 0.32
-23 -5 2 9.06 0.56
-23 -5 2 8.87 0.52
23 5 -2 11.51 0.64
-23 5 2 11.55 0.56
-23 5 2 11.13 0.55
-21 -5 2 3.5 0.31
-21 -5 2 3.29 0.32
-21 5 2 3.08 0.28
-21 5 2 3.35 0.27
21 5 -2 2.93 0.36
-19 -5 2 7.24 0.45
-19 -5 2 7.42 0.41
-19 5 2 9 0.43
-19 5 2 8.82 0.42
19 5 -2 8.1 0.53
17 -5 -2 59.24 1.88
-17 -5 2 62.64 1.94
-17 -5 2 60.3 1.95
-17 5 2 68.79 2.11
17 5 -2 66.33 2.19
-17 5 2 66.47 2.11
-15 -5 2 2.6 0.23
-15 -5 2 3.14 0.25
15 -5 -2 2.47 0.18
-15 5 2 3.4 0.25
-15 5 2 3.45 0.25
15 5 -2 3.84 0.33
-13 -5 2 7.19 0.36
-13 -5 2 6.55 0.32
13 -5 -2 7.69 0.28
-13 5 2 4.98 0.24
-13 5 2 5.05 0.25
13 5 -2 4.06 0.34
-11 -5 2 7.14 0.33
-11 -5 2 6.89 0.32
11 -5 -2 7.01 0.26
11 5 -2 11.91 0.52
-11 5 2 9.72 0.4
-11 5 2 11.92 0.4
-11 5 2 11.09 0.4
11 5 -2 11.35 0.65
-9 -5 2 19.54 0.65
9 -5 -2 18.94 0.63
-9 -5 2 19.78 0.65
9 -5 -2 19.66 0.62
9 5 -2 27.16 0.94
-9 5 2 27.27 0.84
9 5 -2 26.14 1.04
-9 5 2 26.69 0.85
-9 5 2 26.59 0.85
7 -5 -2 57.5 1.71
7 -5 -2 55.69 1.7
-7 -5 2 56.29 1.72
-7 -5 2 53.73 1.83
-7 -5 2 53.88 1.72
7 5 -2 61.14 2.01
-7 5 2 67.33 1.96
7 5 -2 61.12 2.09
-7 5 2 63.8 1.95
-7 5 2 64.32 1.95
5 -5 -2 72.58 2.25
-5 -5 2 73.13 2.3
5 -5 -2 73.75 2.25
-5 -5 2 74.89 2.34
-5 -5 2 72.69 2.27
-5 -5 2 74.4 2.27
5 -5 -2 74.69 2.26
5 5 -2 66.48 2.33
-5 5 2 72.58 2.24
-5 5 2 77.01 2.24
5 5 -2 71.77 2.29
-5 5 2 72.1 2.23
5 5 -2 76.25 2.25
5 5 -2 75.92 2.25
3 -5 -2 4.55 0.14
3 -5 -2 4.55 0.17
-3 -5 2 4.61 0.18
3 -5 -2 4.24 0.16
-3 5 2 9.08 0.34
3 5 -2 11.17 0.39
-3 5 2 9.34 0.33
3 5 -2 10.01 0.34
3 5 -2 10.22 0.42
3 5 -2 9.62 0.33
1 -5 -2 276.49 8.56
-1 -5 2 289.31 8.63
1 -5 -2 265.07 8.5
-1 -5 2 286.56 8.61
1 -5 -2 275.06 8.6
-1 -5 2 288.93 8.62
-1 -5 2 279.76 8.58
1 5 -2 260.57 7.95
-1 5 2 252.64 7.98
-1 5 2 254.44 8.02
1 5 -2 265.91 8.06
-1 5 2 249.53 8.1
1 5 -2 275.69 7.98
1 -5 2 11.39 0.37
-1 -5 -2 11.85 0.39
1 -5 2 11.58 0.39
-1 -5 -2 11.5 0.43
-1 -5 -2 12.18 0.4
1 -5 2 11.58 0.39
-1 -5 -2 11.74 0.37
-1 5 -2 8.44 0.28
1 5 2 8.1 0.29
1 5 2 7.18 0.32
-1 5 -2 8.02 0.27
-1 5 -2 7.75 0.26
1 5 2 8.16 0.28
-3 -5 -2 278.06 8.32
3 -5 2 262.3 8.34
3 -5 2 267.86 8.36
-3 -5 -2 263.65 8.3
-3 -5 -2 269.71 8.31
-3 -5 -2 289.64 8.54
-3 5 -2 279.08 8.97
-3 5 -2 296.24 8.93
-3 5 -2 313.04 8.96
3 5 2 294.8 8.93
3 5 2 293.56 8.97
-3 5 -2 286.67 8.89
3 5 2 289.34 9.1
3 5 2 279.69 8.99
-5 -5 -2 102.94 2.88
-5 -5 -2 88.07 2.79
-5 -5 -2 94.13 2.82
-5 -5 -2 89.34 2.81
-5 -5 -2 89.54 2.8
5 -5 2 86.16 2.8
-5 5 -2 91.23 2.98
5 5 2 99.4 2.99
-5 5 -2 92.37 3
5 5 2 107.91 3.08
-5 5 -2 95.88 2.97
5 5 2 97.8 3
-5 5 -2 94.08 2.98
5 5 2 98.33 2.98
-5 5 -2 94.96 3
5 5 2 101.5 2.99
7 -5 2 112.06 3.38
-7 -5 -2 109.95 3.38
-7 -5 -2 113.91 3.4
-7 -5 -2 109.66 3.38
-7 -5 -2 106.48 3.39
7 5 2 97.2 2.91
7 5 2 91.55 3.02
-7 5 -2 92.92 2.9
-7 5 -2 93.94 2.88
7 5 2 98.9 2.89
7 5 2 91.91 2.92
-9 -5 -2 55.49 1.68
-9 -5 -2 53.8 1.71
9 -5 2 55.56 1.7
-9 -5 -2 53.52 1.71
9 5 2 62.03 1.87
9 5 2 62.39 1.91
-9 5 -2 63.11 1.85
9 5 2 53.74 2.03
-9 5 -2 59.47 1.89
-11 -5 -2 51.02 1.62
11 -5 2 51.85 1.62
-11 -5 -2 50.78 1.59
-11 -5 -2 53.42 1.59
-11 -5 -2 49.82 1.62
-11 5 -2 47.6 1.4
11 5 2 39.06 1.62
-11 5 -2 44.56 1.45
11 5 2 46.36 1.42
11 5 2 46.96 1.48
-13 -5 -2 53.23 1.64
-13 -5 -2 52.98 1.68
-13 -5 -2 52.11 1.67
13 5 2 37.76 1.57
-13 5 -2 40.98 1.3
-13 5 -2 42.8 1.3
13 5 2 42.6 1.32
-13 5 -2 41.3 1.34
-13 5 -2 41.95 1.3
-15 -5 -2 13.27 0.52
-15 -5 -2 12.22 0.51
-15 -5 -2 11.81 0.45
15 5 2 12.53 0.86
-15 5 -2 13.66 0.56
15 5 2 13.71 0.51
-15 5 -2 14.44 0.5
-15 5 -2 14.91 0.5
-15 5 -2 13.55 0.49
-17 -5 -2 15.35 0.63
-17 -5 -2 15.16 0.63
17 5 2 13.51 0.94
17 5 2 13.44 0.5
-17 5 -2 13.28 0.59
-17 5 -2 13.15 0.51
-19 -5 -2 2.12 0.29
-19 -5 -2 2.13 0.29
-19 5 -2 3.56 0.25
19 5 2 3.35 0.27
-19 5 -2 2.65 0.29
-21 -5 -2 6.64 0.51
-21 -5 -2 6.27 0.51
-21 5 -2 7.39 0.41
-21 5 -2 7.4 0.53
-23 -5 -2 13.56 0.71
-23 -5 -2 14.65 0.72
-23 5 -2 14.1 0.61
-23 5 -2 14.16 0.72
-25 -5 -2 1.1 0.35
-25 -5 -2 0.49 0.37
-25 5 -2 0.6 0.34
-27 -5 -2 0.18 0.37
-27 -5 -2 0.17 0.39
-27 5 -2 -0.54 0.37
-29 -5 -2 1.03 0.41
-29 -5 -2 0.2 0.44
-29 5 -2 -0.72 0.37
-30 -6 2 2.6 0.46
-30 -6 2 2.24 0.44
-30 6 2 3.24 0.41
-28 -6 2 1.52 0.4
-28 -6 2 1.46 0.4
28 6 -2 1.43 0.4
-28 6 2 1.74 0.34
-26 -6 2 1.36 0.35
-26 -6 2 1.85 0.37
-26 6 2 1.93 0.3
26 6 -2 1.92 0.39
-26 6 2 1.65 0.3
-24 -6 2 0.56 0.31
-24 -6 2 1.25 0.32
-24 6 2 0.5 0.25
-24 6 2 -0.26 0.23
24 6 -2 0.52 0.32
-22 -6 2 11.07 0.6
-22 -6 2 11.34 0.59
-22 6 2 13.18 0.58
-22 6 2 13.81 0.58
22 6 -2 13 0.64
-20 -6 2 2.88 0.29
-20 -6 2 2.91 0.32
-20 6 2 1.88 0.23
-20 6 2 1.56 0.22
20 6 -2 1.4 0.31
-18 -6 2 12.64 0.56
-18 -6 2 12.33 0.57
-18 6 2 15.95 0.59
-18 6 2 15.75 0.59
18 6 -2 15.68 0.71
-16 -6 2 15.22 0.63
16 -6 -2 15.65 0.53
-16 -6 2 16.88 0.62
16 6 -2 19.3 0.78
-16 6 2 20.54 0.69
-16 6 2 19.5 0.69
14 -6 -2 2.83 0.17
-14 -6 2 3.06 0.24
-14 -6 2 3.31 0.23
14 6 -2 2.44 0.3
-14 6 2 2.07 0.16
-14 6 2 2.16 0.17
-12 -6 2 3.04 0.25
-12 -6 2 3.19 0.26
12 -6 -2 3.16 0.16
-12 6 2 4.2 0.22
12 6 -2 4.3 0.47
12 6 -2 3.69 0.34
-12 6 2 4.23 0.22
10 -6 -2 18.25 0.58
-10 -6 2 18.09 0.62
-10 -6 2 17.86 0.62
10 -6 -2 17.36 0.59
-10 6 2 24.54 0.78
10 6 -2 24.3 1
10 6 -2 24.42 0.88
-10 6 2 24.21 0.78
-10 6 2 25.09 0.79
8 -6 -2 57.65 1.77
8 -6 -2 59.41 1.77
-8 -6 2 57.8 1.79
-8 -6 2 55.17 1.79
-8 6 2 67.78 2.06
8 6 -2 67.36 2.13
-8 6 2 66.9 2.06
8 6 -2 64.23 2.23
-8 6 2 69.18 2.06
-6 -6 2 72.81 2.2
-6 -6 2 72.94 2.29
6 -6 -2 70.64 2.18
6 -6 -2 71.31 2.18
6 -6 -2 69.24 2.18
-6 -6 2 71.43 2.2
6 6 -2 78.43 2.4
-6 6 2 77.98 2.34
-6 6 2 78.31 2.33
-6 6 2 77.55 2.34
6 6 -2 69.33 2.46
-4 -6 2 115.93 3.43
4 -6 -2 109.88 3.4
-4 -6 2 111.19 3.39
4 -6 -2 107.07 3.37
-4 -6 2 110.65 3.41
4 -6 -2 109.16 3.39
-4 -6 2 110.89 3.38
4 6 -2 120.27 3.8
-4 6 2 122.25 3.75
4 6 -2 115.46 3.83
4 6 -2 129.72 3.76
-4 6 2 126.28 3.75
4 6 -2 126.99 3.76
-4 6 2 121 3.75
-4 6 2 122.31 3.76
2 -6 -2 163.08 5.05
-2 -6 2 160.18 5.1
2 -6 -2 162.16 5.08
-2 -6 2 162.12 5.03
-2 -6 2 171.34 5.06
-2 -6 2 166.56 5.11
2 -6 -2 171.34 5.1
2 6 -2 148.52 4.47
-2 6 2 141.49 4.49
2 6 -2 145.99 4.45
2 6 -2 145.78 4.49
-2 6 2 147.64 4.52
2 6 -2 148.47 4.56
-2 6 2 145.48 4.5
0 -6 2 306.3 9.56
0 -6 2 307.51 9.59
0 -6 -2 297.98 9.48
0 -6 2 316.44 9.54
0 -6 2 315.33 9.61
0 -6 -2 321.35 9.58
0 -6 -2 314.98 9.62
0 -6 2 315.4 9.6
0 -6 -2 314.1 9.6
0 6 -2 314.15 9.42
0 6 2 293.68 9.32
0 6 -2 298.75 9.44
0 6 2 308.83 9.55
0 6 2 300.53 9.27
0 6 -2 322.64 9.38
0 6 2 288.77 9.39
0 6 -2 311.27 9.32
2 -6 2 49.77 1.51
-2 -6 -2 47.82 1.48
-2 -6 -2 47.48 1.5
-2 -6 -2 48.71 1.54
2 -6 2 46.26 1.48
2 -6 2 50.26 1.5
-2 -6 -2 49.48 1.51
2 -6 2 48.22 1.5
2 6 2 62 1.96
-2 6 -2 63.39 1.93
-2 6 -2 64.59 1.91
2 6 2 61.13 1.92
-2 6 -2 60.88 1.92
2 6 2 60.97 1.91
-2 6 -2 60.62 1.91
2 6 2 62.45 1.9
-2 6 -2 63.43 1.9
-4 -6 -2 67.63 2.06
4 -6 2 60.82 2.04
-4 -6 -2 71.15 2.12
-4 -6 -2 67.44 2.07
4 -6 2 68.16 2.06
-4 -6 -2 65.71 2.05
4 -6 2 67.26 2.06
-4 6 -2 74.56 2.27
4 6 2 74.03 2.34
4 6 2 75.65 2.27
4 6 2 73.59 2.27
-4 6 -2 73.45 2.27
4 6 2 73 2.28
-4 6 -2 72.99 2.27
-4 6 -2 73.25 2.25
6 -6 2 75.07 2.25
6 -6 2 72.82 2.25
-6 -6 -2 74.45 2.22
6 -6 2 71.22 2.23
-6 -6 -2 72.09 2.25
-6 -6 -2 73.16 2.26
-6 6 -2 85.27 2.54
-6 6 -2 83.04 2.56
6 6 2 82.59 2.56
-6 6 -2 84.65 2.55
6 6 2 88.03 2.57
6 6 2 79.26 2.58
6 6 2 81.54 2.58
6 6 2 83.78 2.67
-8 -6 -2 38.58 1.22
8 -6 2 36.99 1.21
-8 -6 -2 39.77 1.18
-8 -6 -2 37.81 1.21
8 6 2 41.74 1.33
-8 6 -2 38.99 1.27
8 6 2 40.34 1.46
8 6 2 44.14 1.3
-10 -6 -2 176.59 5.49
-10 -6 -2 180.48 5.5
10 -6 2 181.8 5.49
-10 -6 -2 180.04 5.48
-10 6 -2 187.56 5.42
10 6 2 161.44 5.59
10 6 2 180.48 5.43
10 6 2 180.81 5.46
-10 6 -2 176.89 5.44
-12 -6 -2 66.69 1.98
-12 -6 -2 64.72 1.99
-12 -6 -2 62.78 2.02
-12 -6 -2 62.58 2.01
12 6 2 51.78 1.6
12 6 2 43.94 1.81
12 6 2 51.7 1.66
-12 6 -2 51.5 1.62
-12 6 -2 52.72 1.57
-14 -6 -2 48.93 1.57
-14 -6 -2 48.55 1.53
-14 -6 -2 48.8 1.57
-14 6 -2 47.68 1.53
-14 6 -2 48.66 1.48
14 6 2 48.65 1.51
-14 6 -2 47.85 1.47
14 6 2 42.51 1.77
-14 6 -2 46.23 1.48
-16 -6 -2 40.03 1.36
-16 -6 -2 45.4 1.42
-16 -6 -2 44.2 1.42
-16 6 -2 41.19 1.34
16 6 2 42.47 1.36
16 6 2 40.68 1.7
-16 6 -2 44.6 1.36
-16 6 -2 42.68 1.34
-16 6 -2 40.63 1.39
-18 -6 -2 1.92 0.26
-18 -6 -2 2.36 0.27
18 6 2 3.88 0.65
-18 6 -2 4.28 0.33
-18 6 -2 4.47 0.29
18 6 2 3.92 0.29
-20 -6 -2 10.98 0.55
-20 -6 -2 10.91 0.59
-20 6 -2 10.9 0.55
20 6 2 10.97 0.46
20 6 2 11.85 1.03
-20 6 -2 10.99 0.48
-22 -6 -2 5.38 0.42
-22 -6 -2 4.98 0.41
-22 6 -2 4.51 0.4
-22 6 -2 5.14 0.37
-24 -6 -2 4.19 0.42
-24 -6 -2 4.46 0.41
-24 6 -2 4.52 0.43
-26 -6 -2 0.03 0.35
-26 -6 -2 0.36 0.36
-26 6 -2 0.71 0.36
-28 -6 -2 0.86 0.39
-28 -6 -2 0.72 0.4
-28 6 -2 1.18 0.43
-29 -7 2 4.74 0.46
-29 -7 2 4.88 0.5
-29 7 2 4.58 0.42
-27 -7 2 1.36 0.39
-27 -7 2 0.48 0.36
-27 7 2 1.23 0.31
27 7 -2 0.98 0.38
-25 -7 2 4.52 0.43
-25 -7 2 4.89 0.43
-25 7 2 4.88 0.37
25 7 -2 4.7 0.46
-25 7 2 3.97 0.34
-23 -7 2 0.05 0.3
-23 -7 2 0.53 0.29
-23 7 2 0.24 0.22
23 7 -2 0.31 0.33
-23 7 2 1.08 0.25
-21 -7 2 15.48 0.71
-21 -7 2 16.77 0.71
-21 7 2 15.15 0.61
21 7 -2 15.1 0.74
-21 7 2 15.88 0.63
-19 -7 2 7.42 0.46
-19 -7 2 7.09 0.47
-19 7 2 4.37 0.31
-19 7 2 4.08 0.33
19 7 -2 4.21 0.4
-17 -7 2 10.21 0.49
-17 -7 2 10.18 0.51
17 7 -2 10.91 0.57
-17 7 2 11.63 0.47
-17 7 2 11.38 0.45
-15 -7 2 35.5 1.18
-15 -7 2 35.04 1.19
15 -7 -2 36.55 1.12
15 7 -2 35.26 1.26
-15 7 2 35.17 1.14
-15 7 2 36.08 1.14
15 7 -2 35.39 1.47
13 -7 -2 1.12 0.1
-13 -7 2 1.12 0.18
-13 -7 2 0.85 0.18
13 7 -2 2.47 0.43
-13 7 2 2.66 0.2
-13 7 2 2.88 0.2
13 7 -2 3.01 0.31
-11 -7 2 1.24 0.17
11 -7 -2 1.02 0.12
-11 -7 2 1.41 0.17
11 -7 -2 1.44 0.11
-11 7 2 2.99 0.18
11 7 -2 3.07 0.43
-11 7 2 3.51 0.18
11 7 -2 3.28 0.31
9 -7 -2 49.3 1.48
-9 -7 2 47.53 1.52
-9 -7 2 48.91 1.52
9 -7 -2 47.01 1.5
-9 7 2 44.08 1.38
9 7 -2 44.21 1.47
-9 7 2 45.88 1.38
9 7 -2 42.72 1.59
-9 7 2 45.56 1.38
-7 -7 2 107.12 3.3
7 -7 -2 103.28 3.18
-7 -7 2 101.7 3.19
7 -7 -2 102.19 3.18
7 -7 -2 104.36 3.17
-7 -7 2 105.7 3.2
-7 7 2 94.71 2.83
7 7 -2 95.34 2.91
-7 7 2 96.42 2.84
-7 7 2 94.49 2.84
7 7 -2 82.69 2.97
5 -7 -2 41.8 1.3
-5 -7 2 41.14 1.32
5 -7 -2 40.71 1.3
-5 -7 2 41.43 1.31
-5 -7 2 45.19 1.39
-5 7 2 51.81 1.61
-5 7 2 51.88 1.62
5 7 -2 52.69 1.67
-5 7 2 50.96 1.59
-5 7 2 54.24 1.61
3 -7 -2 29.57 0.93
-3 -7 2 29.57 0.97
-3 -7 2 31.59 0.98
3 -7 -2 29.8 0.93
-3 -7 2 28.86 0.94
-3 7 2 30.59 0.98
3 7 -2 31.53 0.98
-3 7 2 29.95 0.99
3 7 -2 32.42 0.98
-3 7 2 30.62 1.04
3 7 -2 31.97 1.05
3 7 -2 32.41 1.04
1 -7 -2 92.7 2.98
-1 -7 2 99.39 2.99
-1 -7 2 96.78 3
1 -7 -2 95.64 3.03
-1 -7 2 102.25 3.01
-1 -7 2 98.93 3.01
1 -7 -2 97.27 2.99
-1 7 2 112.54 3.51
1 7 -2 114.14 3.49
-1 7 2 115.4 3.51
-1 7 2 107.85 3.47
1 7 -2 112.99 3.49
-1 7 2 109.73 3.46
1 7 -2 118.26 3.47
1 7 -2 116.38 3.48
1 -7 2 15.38 0.49
-1 -7 -2 15.94 0.56
1 -7 2 15.65 0.51
1 -7 2 15.18 0.52
1 -7 2 16.33 0.53
-1 -7 -2 16.25 0.52
-1 -7 -2 15.89 0.51
-1 -7 -2 15.02 0.49
1 7 2 14.48 0.48
1 7 2 13.95 0.45
-1 7 -2 14.77 0.48
-1 7 -2 14.19 0.49
1 7 2 14.79 0.53
1 7 2 14.03 0.44
-1 7 -2 14.39 0.46
1 7 2 14.16 0.47
-1 7 -2 14.85 0.5
-3 -7 -2 5.62 0.22
-3 -7 -2 5.83 0.23
-3 -7 -2 5.04 0.2
3 -7 2 5.19 0.22
3 -7 2 5.42 0.22
-3 -7 -2 5.67 0.28
-3 7 -2 1.96 0.15
-3 7 -2 2.28 0.17
3 7 2 2.34 0.15
-3 7 -2 2.14 0.09
3 7 2 2.19 0.23
3 7 2 2.63 0.17
-3 7 -2 2.21 0.13
-3 7 -2 2.24 0.14
3 7 2 2.15 0.12
5 -7 2 39.51 1.24
-5 -7 -2 40.75 1.23
-5 -7 -2 40.31 1.25
5 -7 2 39.18 1.24
5 -7 2 38.52 1.21
5 7 2 42.65 1.31
-5 7 -2 41.77 1.28
5 7 2 43.99 1.42
5 7 2 41.6 1.33
-5 7 -2 41.69 1.32
5 7 2 41.11 1.31
5 7 2 41.81 1.33
-7 -7 -2 32.82 0.97
-7 -7 -2 33.02 1.02
7 -7 2 29.53 1
-7 -7 -2 31.76 1
7 -7 2 30.16 1
-7 7 -2 28.81 0.97
7 7 2 35.46 1.19
-7 7 -2 29.99 1
-7 7 -2 29.48 0.97
7 7 2 34.07 1.01
7 7 2 32.82 1.04
-9 -7 -2 17.4 0.6
9 -7 2 17.24 0.6
-9 -7 -2 17.88 0.62
-9 -7 -2 17.99 0.56
-9 7 -2 22.45 0.7
9 7 2 22.79 0.79
9 7 2 23.4 0.75
9 7 2 21.14 0.93
-9 7 -2 21.02 0.76
-11 -7 -2 20.47 0.71
-11 -7 -2 20.97 0.66
11 -7 2 20.88 0.71
-11 -7 -2 20.27 0.72
11 7 2 22.33 0.82
-11 7 -2 23.28 0.71
11 7 2 22.58 0.76
11 7 2 19.44 0.98
-11 7 -2 22.2 0.78
-13 -7 -2 66.15 2.05
-13 -7 -2 64.41 2.08
-13 -7 -2 67.1 2.07
-13 7 -2 55.36 1.81
13 7 2 52.73 2.07
13 7 2 59.66 1.8
-13 7 -2 58.64 1.76
-15 -7 -2 49.44 1.65
-15 -7 -2 53.69 1.64
-15 -7 -2 51.23 1.67
-15 7 -2 48.56 1.48
-15 7 -2 46.81 1.48
-15 7 -2 47.56 1.55
15 7 2 48.22 1.52
15 7 2 44.42 1.83
-17 -7 -2 22.11 0.83
-17 -7 -2 22.41 0.81
-17 7 -2 22.54 0.84
17 7 2 22.57 0.79
17 7 2 21.47 1.19
-17 7 -2 22.18 0.75
-19 -7 -2 14.95 0.67
-19 -7 -2 13.81 0.65
-19 7 -2 16.04 0.68
-19 7 -2 16.11 0.58
19 7 2 15.27 0.6
19 7 2 13.55 1.16
-21 -7 -2 2.52 0.32
-21 -7 -2 2.63 0.34
-21 7 -2 3.31 0.33
-21 7 -2 3.22 0.26
21 7 2 3.51 0.74
-23 -7 -2 3.41 0.39
-23 -7 -2 3.27 0.38
-23 7 -2 2.57 0.37
-25 -7 -2 1.53 0.37
-25 -7 -2 1.84 0.37
-25 7 -2 1.21 0.38
-27 -7 -2 -0.15 0.38
-27 -7 -2 -0.1 0.4
-27 7 -2 -0.5 0.37
-29 -7 -2 0.08 0.4
-29 -7 -2 0.07 0.41
-29 7 -2 -0.13 0.41
-28 -8 2 1.23 0.4
-28 -8 2 1.33 0.38
28 8 -2 1.22 0.4
-28 8 2 1.18 0.32
-26 -8 2 0.51 0.33
-26 -8 2 0.53 0.35
-26 8 2 1.42 0.29
26 8 -2 1.4 0.39
-24 -8 2 3.62 0.37
-24 -8 2 4.46 0.42
-24 8 2 5.44 0.44
24 8 -2 5.15 0.46
-24 8 2 4.62 0.34
-22 -8 2 1.89 0.33
-22 -8 2 1.59 0.31
-22 8 2 1.32 0.25
-22 8 2 1.44 0.23
22 8 -2 1.63 0.33
-20 -8 2 22.8 0.88
-20 -8 2 23.55 0.89
-20 8 2 19.31 0.71
-20 8 2 19.27 0.72
20 8 -2 19.82 0.86
-18 -8 2 13.31 0.58
-18 -8 2 12.37 0.58
-18 8 2 8.76 0.39
18 8 -2 7.9 0.57
-18 8 2 8.25 0.4
-16 -8 2 51.64 1.64
-16 -8 2 49.41 1.64
16 8 -2 48.96 1.66
-16 8 2 47.94 1.54
16 8 -2 49.93 1.95
-16 8 2 47.63 1.53
14 -8 -2 8.13 0.28
-14 -8 2 7.92 0.41
-14 -8 2 8.33 0.39
-14 8 2 4.94 0.25
-14 8 2 4.67 0.25
14 8 -2 4.25 0.53
14 8 -2 5.26 0.41
12 -8 -2 31.72 0.99
-12 -8 2 31.38 1.05
-12 -8 2 32.23 1.05
12 8 -2 32.7 1.35
12 8 -2 33.8 1.16
-12 8 2 33.8 1.06
-12 8 2 32.81 1.05
-10 -8 2 4.19 0.26
10 -8 -2 4.21 0.17
-10 -8 2 4.2 0.26
10 -8 -2 4.56 0.21
-10 8 2 5.1 0.21
10 8 -2 4.66 0.48
10 8 -2 4.65 0.36
-10 8 2 4.99 0.21
-8 -8 2 76.81 2.44
8 -8 -2 78.71 2.42
-8 -8 2 80.33 2.44
8 -8 -2 79.65 2.41
-8 8 2 66.02 2.04
-8 8 2 67.87 2.04
8 8 -2 66.21 2.12
8 8 -2 62.54 2.22
-8 8 2 68.43 2.03
6 -8 -2 31.38 0.96
6 -8 -2 30.49 0.97
-6 -8 2 29.43 0.99
-6 -8 2 30.81 0.99
-6 -8 2 33.3 1.08
-6 8 2 38.85 1.21
-6 8 2 38.72 1.24
6 8 -2 43.1 1.31
6 8 -2 39.99 1.39
-6 8 2 38.73 1.23
-6 8 2 39.06 1.23
-6 8 2 39.03 1.23
-4 -8 2 50.03 1.58
4 -8 -2 51.94 1.57
-4 -8 2 48.34 1.59
4 -8 -2 50.33 1.57
-4 -8 2 54.64 1.64
4 8 -2 35.33 1.21
-4 8 2 34.61 1.11
-4 8 2 35.99 1.1
-4 8 2 34.74 1.17
4 8 -2 36.56 1.17
-4 8 2 35.69 1.11
-4 8 2 35.59 1.08
2 -8 -2 11.31 0.39
-2 -8 2 11.95 0.43
2 -8 -2 11.44 0.39
-2 -8 2 11.21 0.39
2 -8 -2 11.69 0.41
-2 -8 2 13.35 0.46
-2 8 2 8.89 0.3
2 8 -2 9.76 0.4
-2 8 2 8.7 0.39
-2 8 2 8.76 0.32
-2 8 2 8.94 0.33
2 8 -2 9.8 0.39
2 8 -2 8.98 0.32
2 8 -2 10.22 0.35
0 -8 2 9.37 0.34
0 -8 -2 9.7 0.3
0 -8 2 9.55 0.31
0 -8 2 9.69 0.36
0 -8 2 9.71 0.34
0 -8 -2 9.33 0.39
0 -8 -2 9.51 0.33
0 -8 -2 9.67 0.34
0 -8 2 9.97 0.37
0 8 2 4.8 0.16
0 8 2 5.05 0.27
0 8 2 4.88 0.21
0 8 -2 4.46 0.23
0 8 2 4.67 0.2
0 8 -2 4.89 0.27
0 8 2 5 0.16
0 8 -2 5.12 0.18
-2 -8 -2 59.27 1.86
2 -8 2 61.53 1.88
-2 -8 -2 62.98 1.88
2 -8 2 60.36 1.89
2 8 2 67.17 2.09
-2 8 -2 67.56 2.11
2 8 2 65.33 2.1
-2 8 -2 69.93 2.07
2 8 2 68.54 2.07
-2 8 -2 69.43 2.11
2 8 2 66.99 2.15
-4 -8 -2 66.62 2.05
4 -8 2 67.61 2.07
4 -8 2 66.03 2.07
-4 -8 -2 66.21 2.07
4 -8 2 65.82 2.04
-4 -8 -2 69.41 2.08
4 8 2 77.47 2.43
-4 8 -2 77.89 2.44
-4 8 -2 78.68 2.41
4 8 2 80.01 2.51
4 8 2 81.96 2.42
4 8 2 77 2.44
6 -8 2 16.35 0.55
-6 -8 -2 16.35 0.56
-6 -8 -2 16.12 0.53
6 -8 2 15.19 0.54
6 8 2 18.57 0.75
-6 8 -2 16.14 0.53
-6 8 -2 16.48 0.58
6 8 2 17.52 0.6
6 8 2 17.34 0.57
6 8 2 17.54 0.58
6 8 2 17.55 0.61
8 -8 2 27.24 0.92
-8 -8 -2 28.74 0.93
8 -8 2 28.7 0.92
-8 -8 -2 28.4 0.91
-8 8 -2 25.18 0.88
8 8 2 28.73 0.96
8 8 2 31.65 1.14
8 8 2 29.77 0.93
10 -8 2 17.19 0.59
-10 -8 -2 16.84 0.59
-10 -8 -2 16.45 0.61
10 8 2 20.15 0.99
10 8 2 22.56 0.76
10 8 2 22.39 0.79
-10 8 -2 22.29 0.69
-10 8 -2 21.74 0.76
-12 -8 -2 37.54 1.22
12 -8 2 37.44 1.2
-12 -8 -2 36.72 1.2
-12 8 -2 33.61 1.08
12 8 2 28.36 1.3
12 8 2 33.38 1.14
12 8 2 32.52 1.07
-12 8 -2 32.2 1.01
-14 -8 -2 5.4 0.37
-14 -8 -2 6.2 0.34
-14 8 -2 2.96 0.19
-14 8 -2 2.68 0.25
-14 8 -2 2.49 0.17
14 8 2 2.44 0.52
14 8 2 2.99 0.25
-16 -8 -2 23.75 0.85
-16 -8 -2 23.22 0.87
16 8 2 18.79 1.13
-16 8 -2 22 0.72
-16 8 -2 22.14 0.79
-16 8 -2 21.76 0.72
16 8 2 21.89 0.78
-18 -8 -2 25.33 0.93
-18 -8 -2 25.72 0.95
18 8 2 22.48 1.26
-18 8 -2 22.63 0.78
-18 8 -2 23.52 0.87
18 8 2 23.58 0.83
-20 -8 -2 8.42 0.55
-20 -8 -2 8.18 0.53
20 8 2 9.3 0.45
-20 8 -2 8.84 0.42
20 8 2 9.59 1.01
-20 8 -2 9.16 0.54
-22 -8 -2 2.35 0.35
-22 -8 -2 1.7 0.34
22 8 2 1.23 0.7
-22 8 -2 1.08 0.32
-24 -8 -2 3.92 0.43
-24 -8 -2 3.35 0.39
-24 8 -2 3.58 0.42
-26 -8 -2 0.21 0.37
-26 -8 -2 0.53 0.39
-26 8 -2 -0.46 0.38
-28 -8 -2 0.36 0.38
-28 -8 -2 0.33 0.42
-28 8 -2 0.3 0.41
-29 -9 2 0.21 0.42
-29 -9 2 0.29 0.41
-29 9 2 0.78 0.32
-27 -9 2 0.26 0.37
-27 -9 2 0.66 0.39
27 9 -2 0.4 0.39
-27 9 2 0.63 0.3
-25 -9 2 1.29 0.36
-25 -9 2 0.69 0.36
25 9 -2 1.3 0.38
-25 9 2 1.22 0.29
-23 -9 2 0.49 0.3
-23 -9 2 0.14 0.29
23 9 -2 1.07 0.36
-23 9 2 0.53 0.22
-23 9 2 0.49 0.25
-21 -9 2 2.04 0.32
-21 -9 2 3.08 0.36
-21 9 2 3.24 0.28
21 9 -2 3.82 0.43
-21 9 2 3.03 0.26
-19 -9 2 13.66 0.59
-19 -9 2 12.9 0.62
-19 9 2 9.78 0.44
-19 9 2 9.31 0.42
19 9 -2 9.56 0.58
-17 -9 2 4.96 0.4
-17 -9 2 4.92 0.4
17 9 -2 4.65 0.43
-17 9 2 4.01 0.28
17 9 -2 4.05 0.63
-17 9 2 3.65 0.27
-15 -9 2 24.74 0.88
-15 -9 2 24.97 0.89
-15 9 2 22.16 0.73
15 9 -2 21.05 1.1
15 9 -2 22.32 0.9
-15 9 2 21.24 0.73
-13 -9 2 10.99 0.46
-13 -9 2 9.98 0.44
-13 9 2 6.65 0.29
13 9 -2 6.31 0.65
-13 9 2 7.05 0.28
13 9 -2 6.27 0.49
-11 -9 2 15.31 0.57
-11 -9 2 15.27 0.57
-11 9 2 16.55 0.54
11 9 -2 16.27 0.67
-11 9 2 16.55 0.54
11 9 -2 13.94 0.8
-9 -9 2 49.09 1.56
-9 -9 2 48.83 1.56
9 -9 -2 48.75 1.54
9 -9 -2 50.78 1.51
9 9 -2 37.01 1.27
9 9 -2 35.46 1.41
-9 9 2 38.78 1.18
-9 9 2 38.59 1.17
7 -9 -2 11.58 0.41
-7 -9 2 11.67 0.43
-7 -9 2 11.49 0.43
7 -9 -2 11.82 0.38
-7 9 2 15.38 0.48
7 9 -2 16.89 0.61
-7 9 2 14.63 0.51
7 9 -2 13.93 0.69
-7 9 2 14.48 0.49
-7 9 2 14.75 0.49
5 -9 -2 83.68 2.61
5 -9 -2 84.5 2.6
-5 -9 2 84.86 2.62
-5 -9 2 89.78 2.69
-5 -9 2 83.8 2.63
-5 9 2 63.35 1.93
5 9 -2 61.19 2
5 9 -2 58.16 2.04
-5 9 2 64.16 1.93
-5 9 2 62.59 1.94
-5 9 2 65.78 1.94
-5 9 2 64.33 1.91
-3 -9 2 23.55 0.78
-3 -9 2 21.87 0.73
3 -9 -2 22.46 0.73
-3 -9 2 23.15 0.75
3 -9 -2 23.62 0.72
3 9 -2 19.63 0.68
-3 9 2 19.03 0.6
3 9 -2 19.28 0.71
-3 9 2 19.72 0.7
-3 9 2 18.24 0.61
-3 9 2 17.92 0.62
-1 -9 2 45.1 1.41
-1 -9 2 43.37 1.37
-1 -9 2 44.82 1.39
1 -9 -2 44.54 1.38
-1 -9 2 44.05 1.39
1 -9 -2 45.2 1.38
-1 9 2 35.06 1.08
-1 9 2 35.18 1.07
-1 9 2 34.15 1.15
1 9 -2 35.78 1.08
-1 9 2 34.08 1.06
-1 9 2 33.22 1.09
1 9 -2 33.69 1.13
1 9 -2 36.09 1.13
-1 -9 -2 2.08 0.17
1 -9 2 2.05 0.08
1 -9 2 2.5 0.18
-1 -9 -2 2.31 0.1
1 -9 2 1.93 0.14
1 -9 2 2.41 0.16
-1 -9 -2 1.94 0.13
1 9 2 1.43 0.19
1 9 2 1.53 0.09
1 9 2 1.61 0.07
1 9 2 1.61 0.13
-1 9 -2 1.29 0.14
-1 9 -2 1.75 0.1
-1 9 -2 1.52 0.16
1 9 2 1.28 0.11
3 -9 2 91.26 2.81
3 -9 2 91.7 2.8
3 -9 2 92.79 2.8
-3 -9 -2 89.45 2.8
-3 -9 -2 89.94 2.78
-3 -9 -2 91.9 2.8
-3 9 -2 99.37 2.93
3 9 2 94.96 2.95
-3 9 -2 97.58 2.97
3 9 2 95.73 2.96
3 9 2 96.39 2.94
-3 9 -2 93.07 2.97
3 9 2 95.85 3.02
-5 -9 -2 60.45 1.96
5 -9 2 64.45 1.96
-5 -9 -2 63.96 1.94
5 -9 2 63.16 1.95
5 9 2 72.19 2.3
5 9 2 72.41 2.19
5 9 2 68.35 2.21
-5 9 -2 71.28 2.21
5 9 2 72.65 2.22
5 9 2 69.74 2.2
-5 9 -2 70.62 2.16
7 -9 2 81.34 2.43
-7 -9 -2 77.42 2.44
-7 -9 -2 78.45 2.42
7 -9 2 77.06 2.43
7 9 2 71.84 2.23
7 9 2 71.18 2.34
-7 9 -2 69.31 2.16
-7 9 -2 71.42 2.21
7 9 2 71.72 2.21
9 -9 2 1.41 0.15
-9 -9 -2 1.29 0.13
9 -9 2 1.71 0.17
-9 -9 -2 1.56 0.17
-9 9 -2 3.29 0.14
9 9 2 5.08 0.49
-11 -9 -2 0.5 0.15
-11 -9 -2 0.31 0.17
11 -9 2 0.24 0.14
-11 9 -2 1.33 0.2
11 9 2 1.33 0.24
-11 9 -2 1.23 0.1
11 9 2 1.08 0.38
11 9 2 1.38 0.2
-13 -9 -2 14.04 0.54
-13 -9 -2 13.42 0.57
13 9 2 10.39 0.47
-13 9 -2 10.04 0.35
-13 9 -2 10.47 0.47
13 9 2 8.84 0.76
-15 -9 -2 0.97 0.23
-15 -9 -2 0.96 0.23
-15 9 -2 0.76 0.22
15 9 2 0.01 0.48
-15 9 -2 0.78 0.12
-15 9 -2 0.7 0.11
15 9 2 0.57 0.21
-17 -9 -2 22.07 0.84
-17 -9 -2 22.16 0.81
17 9 2 16.44 1.1
-17 9 -2 17.89 0.6
17 9 2 17.54 0.69
-17 9 -2 17.03 0.7
-19 -9 -2 6.58 0.54
-19 -9 -2 6.57 0.48
-19 9 -2 6.5 0.49
19 9 2 7.38 0.42
-19 9 -2 7.57 0.35
19 9 2 5.73 0.77
-21 -9 -2 2.06 0.33
-21 -9 -2 1.8 0.33
21 9 2 2.35 0.72
-21 9 -2 1.51 0.31
-23 -9 -2 4.52 0.42
-23 -9 -2 3.26 0.4
-23 9 -2 3.35 0.39
-25 -9 -2 1.36 0.39
-25 -9 -2 1.25 0.38
-25 9 -2 0.91 0.34
-27 -9 -2 1.02 0.37
-27 -9 -2 0.09 0.4
-27 9 -2 1.11 0.4
-28 -10 2 0.09 0.38
-28 -10 2 -0.2 0.39
28 10 -2 0.12 0.41
-28 10 2 0.52 0.31
-26 -10 2 -0.24 0.37
-26 -10 2 -0.05 0.35
-26 10 2 0.72 0.28
26 10 -2 0.37 0.39
-24 -10 2 0.41 0.32
-24 -10 2 0.19 0.31
-24 10 2 0.57 0.26
24 10 -2 0.98 0.37
-22 -10 2 2.22 0.33
-22 -10 2 2.58 0.36
-22 10 2 3.42 0.3
22 10 -2 3.99 0.45
-22 10 2 3.59 0.28
-20 -10 2 5.2 0.4
-20 -10 2 4.44 0.36
-20 10 2 4.91 0.33
20 10 -2 5.89 0.48
-20 10 2 5.12 0.35
-18 -10 2 3.16 0.32
-18 -10 2 2.88 0.29
-18 10 2 1.58 0.18
18 10 -2 1.9 0.38
-18 10 2 1.53 0.2
18 10 -2 1.42 0.57
-16 -10 2 7.48 0.45
-16 -10 2 6.94 0.41
16 10 -2 5.43 0.7
-16 10 2 5.86 0.28
16 10 -2 5.74 0.46
-16 10 2 5.29 0.3
-14 -10 2 56.19 1.76
-14 -10 2 53.6 1.77
14 10 -2 49.57 1.65
-14 10 2 48.42 1.51
-14 10 2 48.33 1.52
14 10 -2 46.38 1.84
-12 -10 2 0.48 0.16
-12 -10 2 0.78 0.18
12 10 -2 0.34 0.37
12 10 -2 0.63 0.28
-12 10 2 0.55 0.1
-12 10 2 0.57 0.11
-10 -10 2 6.64 0.33
-10 -10 2 6.4 0.31
-10 10 2 7.73 0.29
10 10 -2 7.69 0.49
-10 10 2 8.35 0.29
10 10 -2 6.6 0.58
8 -10 -2 30.1 0.95
-8 -10 2 30.75 1.01
8 -10 -2 30.93 0.98
-8 -10 2 31.54 1
-8 10 2 30.21 0.93
8 10 -2 27.75 1.14
-8 10 2 29.95 0.94
-8 10 2 31.22 0.95
8 10 -2 28.68 1.04
-6 -10 2 60.46 1.87
6 -10 -2 59.37 1.85
-6 -10 2 60.83 1.86
6 -10 -2 58.5 1.83
6 10 -2 43.22 1.42
-6 10 2 43.52 1.33
-6 10 2 43.61 1.32
-6 10 2 44.41 1.34
-6 10 2 42.42 1.34
6 10 -2 40.09 1.49
4 -10 -2 47.37 1.49
4 -10 -2 47.9 1.48
-4 -10 2 46.5 1.49
-4 -10 2 50.41 1.55
4 10 -2 51.33 1.63
-4 10 2 49.94 1.56
-4 10 2 50.27 1.55
-4 10 2 50.42 1.53
-4 10 2 48.23 1.63
4 10 -2 50.95 1.67
-4 10 2 50.14 1.55
-4 10 2 50.37 1.53
-2 -10 2 35.74 1.11
-2 -10 2 33.98 1.05
2 -10 -2 32.6 1.06
2 -10 -2 33.18 1.05
2 -10 -2 32.12 1.05
-2 -10 2 34.29 1.06
-2 -10 2 33.8 1.07
2 10 -2 25.66 0.85
-2 10 2 23.09 0.77
-2 10 2 23.83 0.75
-2 10 2 22.71 0.73
2 10 -2 26.61 0.84
-2 10 2 23.08 0.76
-2 10 2 22.89 0.84
0 -10 2 60.58 1.92
0 -10 2 61.89 1.87
0 -10 -2 61.68 1.89
0 -10 2 60.7 1.87
0 -10 -2 61.45 1.89
0 -10 2 61.59 1.9
0 -10 2 60.5 1.89
0 10 -2 57.14 1.77
0 10 -2 52.89 1.76
0 10 -2 57.2 1.72
0 10 2 55.53 1.7
0 10 2 56.2 1.71
0 10 2 56.7 1.73
0 10 2 55.02 1.8
0 10 2 56.25 1.74
-2 -10 -2 83.33 2.65
-2 -10 -2 87.02 2.66
-2 -10 -2 87.79 2.64
2 -10 2 89.07 2.67
2 -10 2 86.8 2.66
2 -10 2 84.45 2.64
-2 10 -2 98.85 3.01
-2 10 -2 101.96 2.98
-2 10 -2 93.61 3.01
2 10 2 93.52 2.99
2 10 2 95.32 2.99
2 10 2 97.74 2.97
2 10 2 99.87 3.07
4 -10 2 15.85 0.56
4 -10 2 16.81 0.57
-4 -10 -2 16.79 0.58
-4 -10 -2 17 0.51
-4 -10 -2 17.08 0.54
4 10 2 13.77 0.49
4 10 2 14.02 0.45
-4 10 -2 13.74 0.43
4 10 2 13.26 0.49
4 10 2 13.62 0.5
4 10 2 13.18 0.59
-4 10 -2 13.31 0.49
-4 10 -2 13.45 0.5
6 -10 2 19.27 0.66
-6 -10 -2 19.63 0.67
6 -10 2 19.68 0.67
-6 -10 -2 19.89 0.65
-6 -10 -2 20.36 0.61
6 10 2 18.72 0.68
-6 10 -2 19.08 0.59
6 10 2 19.51 0.66
6 10 2 19.32 0.79
-6 10 -2 18.38 0.65
6 10 2 19.42 0.67
6 10 2 19.32 0.63
-8 -10 -2 8.73 0.38
8 -10 2 8.39 0.34
-8 -10 -2 8.52 0.34
8 -10 2 8.74 0.35
8 10 2 8.73 0.37
8 10 2 8.29 0.56
8 10 2 8.28 0.43
-8 10 -2 8.36 0.35
-10 -10 -2 10.89 0.46
-10 -10 -2 11.17 0.43
10 -10 2 10.52 0.43
10 10 2 15.75 0.57
-10 10 -2 13.93 0.57
10 10 2 15.99 0.62
10 10 2 14.03 0.79
-10 10 -2 14.6 0.47
-12 -10 -2 3.9 0.26
-12 -10 -2 3.67 0.28
12 -10 2 4.04 0.27
-12 10 -2 5.54 0.36
12 10 2 6.31 0.44
12 10 2 5.67 0.58
-12 10 -2 5.4 0.21
12 10 2 6.19 0.36
-14 -10 -2 9.54 0.49
-14 -10 -2 9.45 0.43
-14 10 -2 5.38 0.22
14 10 2 4.53 0.66
-14 10 -2 5.55 0.24
-14 10 -2 6.24 0.36
14 10 2 5.36 0.39
-16 -10 -2 3.62 0.34
-16 -10 -2 4.01 0.31
16 10 2 1.37 0.24
-16 10 -2 1.44 0.14
16 10 2 0.78 0.54
-16 10 -2 1.09 0.25
-18 -10 -2 6.48 0.46
-18 -10 -2 7.26 0.52
18 10 2 5.08 0.75
-18 10 -2 5.95 0.3
18 10 2 6.22 0.42
-18 10 -2 6.21 0.46
-20 -10 -2 2.16 0.32
-20 -10 -2 2.39 0.35
20 10 2 1.59 0.66
-20 10 -2 2.53 0.31
20 10 2 2.7 0.28
-22 -10 -2 3.59 0.4
-22 -10 -2 3.12 0.35
22 10 2 2.47 0.82
-22 10 -2 2.43 0.35
-24 -10 -2 0.35 0.36
-24 -10 -2 0.79 0.32
-24 10 -2 0.69 0.33
-26 -10 -2 2.01 0.44
-26 -10 -2 1.85 0.38
-26 10 -2 1.39 0.4
-28 -10 -2 0.95 0.43
-28 -10 -2 0.65 0.44
-28 10 -2 -0.42 0.41
-27 -11 2 1.1 0.4
-27 -11 2 1.4 0.39
-27 11 2 2.93 0.33
27 11 -2 2.54 0.48
-25 -11 2 1.95 0.39
-25 -11 2 0.96 0.37
-25 11 2 1.39 0.29
25 11 -2 0.81 0.41
-23 -11 2 2.57 0.38
-23 -11 2 2.88 0.36
23 11 -2 2.36 0.41
-23 11 2 2.81 0.29
-21 -11 2 3.34 0.37
-21 -11 2 2.57 0.33
21 11 -2 3.92 0.46
-21 11 2 3.67 0.26
-21 11 2 3.86 0.29
-19 -11 2 6.07 0.44
-19 -11 2 6 0.49
19 11 -2 4.09 0.43
19 11 -2 5.41 0.76
-19 11 2 4.77 0.3
-19 11 2 4.76 0.34
-17 -11 2 0.75 0.26
-17 -11 2 0.48 0.24
17 11 -2 -0.06 0.3
-17 11 2 0.61 0.16
17 11 -2 -0.13 0.56
-17 11 2 0.13 0.13
-15 -11 2 15.67 0.65
-15 -11 2 16.47 0.66
15 11 -2 13.45 0.67
-15 11 2 13.85 0.5
15 11 -2 12.66 0.92
-15 11 2 14.11 0.49
-13 -11 2 6.99 0.4
-13 -11 2 6.84 0.37
13 11 -2 3.15 0.56
-13 11 2 4 0.21
13 11 -2 4.41 0.38
-13 11 2 4.37 0.24
-11 -11 2 1.56 0.2
-11 -11 2 2.17 0.21
-11 11 2 0.44 0.12
11 11 -2 0.26 0.28
-11 11 2 0.62 0.1
11 11 -2 0.16 0.39
-11 11 2 0.45 0.09
-9 -11 2 33.36 1.08
-9 -11 2 32.36 1.08
9 -11 -2 32.84 1.05
-9 11 2 28.94 0.92
-9 11 2 29.66 0.91
9 11 -2 26.42 1.14
-9 11 2 29.73 0.9
9 11 -2 28.03 1.03
7 -11 -2 14.64 0.46
7 -11 -2 14.73 0.51
-7 -11 2 15.03 0.54
-7 -11 2 14.7 0.53
-7 11 2 15.12 0.52
7 11 -2 14.31 0.65
-7 11 2 15.2 0.49
7 11 -2 14.32 0.74
-7 11 2 16.12 0.5
-5 -11 2 45.35 1.44
5 -11 -2 46.21 1.41
5 -11 -2 46.09 1.42
5 -11 -2 45.79 1.43
-5 -11 2 46.46 1.45
-5 11 2 48.88 1.51
5 11 -2 48.43 1.65
-5 11 2 49.49 1.49
-5 11 2 48.97 1.52
5 11 -2 48.93 1.59
-5 11 2 47.01 1.6
3 -11 -2 136.14 4.2
-3 -11 2 134.07 4.2
-3 -11 2 139.4 4.23
-3 -11 2 140.44 4.26
3 -11 -2 140.16 4.2
3 -11 -2 136.43 4.21
-3 11 2 121.16 3.81
-3 11 2 119.38 3.73
-3 11 2 123.99 3.71
3 11 -2 117.66 3.78
-3 11 2 123.55 3.72
3 11 -2 127.56 3.82
-3 11 2 120.04 3.7
-1 -11 2 108.46 3.34
1 -11 -2 107.48 3.32
-1 -11 2 109.58 3.37
-1 -11 2 107.16 3.33
-1 -11 2 111.44 3.32
1 -11 -2 111.84 3.33
-1 -11 2 108.14 3.33
1 -11 -2 105.34 3.32
-1 11 2 109.44 3.35
-1 11 2 105.58 3.33
1 11 -2 105.24 3.39
1 11 -2 120.5 3.35
-1 11 2 109.15 3.43
-1 11 2 108.68 3.33
1 11 -2 110.76 3.4
-1 11 2 105.86 3.35
-1 -11 -2 92.3 2.82
-1 -11 -2 92.1 2.84
-1 -11 -2 93.06 2.84
1 -11 2 91.19 2.84
1 -11 2 90.63 2.84
1 -11 2 95.97 2.86
1 11 2 93.76 2.83
1 11 2 92.4 2.84
-1 11 -2 91.21 2.89
1 11 2 91.01 2.87
1 11 2 91.94 2.86
-1 11 -2 92.97 2.84
1 11 2 95.45 2.94
-1 11 -2 96.06 2.9
-3 -11 -2 89.64 2.67
3 -11 2 87.95 2.7
-3 -11 -2 84.99 2.71
3 -11 2 88.73 2.67
-3 -11 -2 87.89 2.68
3 -11 2 87.13 2.71
-3 11 -2 91.49 2.74
3 11 2 91.84 2.77
-3 11 -2 87.68 2.79
-3 11 -2 92.42 2.8
3 11 2 86.53 2.78
3 11 2 89.06 2.75
3 11 2 90.4 2.86
-5 -11 -2 29 0.93
5 -11 2 29.95 0.95
-5 -11 -2 29.91 0.9
5 -11 2 29.5 0.96
-5 -11 -2 28.29 0.96
-5 11 -2 28.57 0.94
5 11 2 27.92 0.94
-5 11 -2 28.38 0.96
5 11 2 28.98 0.9
5 11 2 28.18 1.05
-5 11 -2 29.16 0.87
5 11 2 28.51 0.94
5 11 2 27.75 0.93
-7 -11 -2 8.97 0.34
-7 -11 -2 9.43 0.39
7 -11 2 8.84 0.37
7 -11 2 8.71 0.36
7 11 2 4.43 0.28
7 11 2 4.86 0.31
7 11 2 5.38 0.47
-7 11 -2 4.6 0.27
9 -11 2 4.98 0.28
-9 -11 -2 4.95 0.3
-9 -11 -2 4.37 0.26
9 -11 2 4.44 0.27
9 11 2 3.94 0.45
9 11 2 5.1 0.39
9 11 2 4.49 0.33
-11 -11 -2 8.63 0.41
11 -11 2 7.92 0.37
-11 -11 -2 7.93 0.37
-11 11 -2 8.23 0.27
11 11 2 8.6 0.76
11 11 2 8.41 0.44
11 11 2 9.1 0.49
-11 11 -2 7.91 0.39
-13 -11 -2 15.57 0.63
13 -11 2 15.28 0.59
-13 -11 -2 15.63 0.58
-13 11 -2 16.72 0.63
13 11 2 15.76 0.64
-13 11 -2 14.96 0.49
13 11 2 13.46 0.92
-15 -11 -2 22.91 0.81
-15 -11 -2 22.59 0.86
-15 11 -2 17.75 0.59
-15 11 -2 18.01 0.72
-15 11 -2 18.44 0.58
15 11 2 15.89 1.06
15 11 2 18.24 0.72
-17 -11 -2 1.6 0.27
-17 -11 -2 1.21 0.29
17 11 2 0.27 0.24
-17 11 -2 0.26 0.14
-17 11 -2 0.3 0.24
17 11 2 -0.21 0.53
-19 -11 -2 4.71 0.41
-19 -11 -2 5.29 0.39
19 11 2 5.96 0.43
-19 11 -2 5.23 0.4
19 11 2 4.75 0.76
-21 -11 -2 1.87 0.37
-21 -11 -2 1.92 0.31
21 11 2 1.67 0.7
-21 11 -2 1.79 0.33
-23 -11 -2 2.34 0.37
-23 -11 -2 0.92 0.37
23 11 2 1.29 0.84
-23 11 -2 1.04 0.35
-25 -11 -2 2.22 0.42
-25 -11 -2 2.86 0.42
-25 11 -2 1.78 0.38
-27 -11 -2 1.24 0.44
-27 -11 -2 0.93 0.42
-27 11 -2 0.2 0.38
-28 -12 2 2.35 0.46
-28 -12 2 1.07 0.43
-28 12 2 0.94 0.31
28 12 -2 1.06 0.43
-26 -12 2 -0.29 0.39
-26 -12 2 0.1 0.38
26 12 -2 0.8 0.41
-26 12 2 0.5 0.27
-24 -12 2 2.09 0.38
-24 -12 2 2.62 0.38
24 12 -2 1.09 0.42
-24 12 2 1.88 0.28
-22 -12 2 3.56 0.41
-22 -12 2 2.74 0.38
-22 12 2 2.75 0.28
22 12 -2 2.71 0.43
-20 -12 2 9.99 0.59
-20 -12 2 9.98 0.55
-20 12 2 9.13 0.42
-20 12 2 9.3 0.44
20 12 -2 9.99 1.02
20 12 -2 9.94 0.7
-18 -12 2 11.35 0.54
-18 -12 2 10.25 0.56
-18 12 2 8.74 0.41
18 12 -2 8.95 0.66
-18 12 2 8.94 0.39
18 12 -2 8.32 0.91
-16 -12 2 1.07 0.25
-16 -12 2 1 0.24
16 12 -2 2.64 0.37
16 12 -2 2.2 0.56
-16 12 2 2.77 0.21
-16 12 2 2.4 0.18
-14 -12 2 41 1.37
-14 -12 2 42.22 1.39
14 12 -2 42.72 1.47
14 12 -2 35.74 1.64
-14 12 2 42.86 1.3
-14 12 2 42.69 1.31
-12 -12 2 12.48 0.51
-12 -12 2 11.52 0.51
-12 12 2 6.71 0.28
-12 12 2 7.16 0.29
-12 12 2 6.72 0.3
12 12 -2 6.92 0.66
12 12 -2 6.12 0.52
-10 -12 2 26.08 0.89
10 -12 -2 26.18 0.86
-10 -12 2 26.63 0.9
-10 12 2 22.24 0.73
10 12 -2 20.17 1.04
-10 12 2 22.67 0.72
10 12 -2 22.14 0.86
-10 12 2 22.7 0.71
-8 -12 2 14.02 0.51
8 -12 -2 13.89 0.49
-8 -12 2 13.06 0.51
-8 12 2 10.28 0.35
8 12 -2 9.98 0.67
8 12 -2 10.21 0.52
-8 12 2 10.53 0.37
-8 12 2 10.73 0.38
6 -12 -2 55.45 1.69
6 -12 -2 57.11 1.73
-6 -12 2 54.01 1.73
-6 -12 2 56.42 1.74
6 -12 -2 53.92 1.69
6 12 -2 51.81 1.72
-6 12 2 54.27 1.63
-6 12 2 53.5 1.61
-6 12 2 53.93 1.63
6 12 -2 49.17 1.78
-6 12 2 51.69 1.73
4 -12 -2 25.85 0.83
-4 -12 2 25.49 0.86
-4 -12 2 25.88 0.83
4 -12 -2 25.37 0.8
4 -12 -2 25.98 0.81
-4 12 2 18.9 0.62
-4 12 2 18.25 0.73
-4 12 2 19.19 0.59
4 12 -2 20.51 0.79
4 12 -2 19.9 0.73
-4 12 2 18.92 0.6
-4 12 2 18.94 0.64
-4 12 2 19.85 0.63
-2 -12 2 30.71 0.94
-2 -12 2 29.59 0.93
-2 -12 2 30.11 0.95
-2 -12 2 28.26 0.96
2 -12 -2 28.84 0.93
2 -12 -2 29.42 0.95
2 -12 -2 29.47 0.93
2 12 -2 37.23 1.22
-2 12 2 35.91 1.11
-2 12 2 35.55 1.1
2 12 -2 35.37 1.19
-2 12 2 35.44 1.14
-2 12 2 35.02 1.22
-2 12 2 36.51 1.13
0 -12 2 46.74 1.42
0 -12 2 45.26 1.49
0 -12 2 47.13 1.47
0 -12 -2 45.83 1.44
0 -12 -2 46.52 1.45
0 -12 2 46.39 1.45
0 -12 2 46.9 1.42
0 12 2 45.98 1.4
0 12 2 44.8 1.44
0 12 -2 44.91 1.48
0 12 2 45.23 1.43
0 12 -2 45.7 1.49
0 12 -2 49.81 1.43
0 12 2 44.67 1.52
0 12 2 44.74 1.4
-2 -12 -2 88.22 2.64
2 -12 2 86.61 2.67
-2 -12 -2 86.13 2.67
-2 -12 -2 89.45 2.63
2 -12 2 84.87 2.66
2 -12 2 87.27 2.64
-2 -12 -2 82.26 2.66
2 12 2 75.36 2.28
2 12 2 74.39 2.4
-2 12 -2 71.16 2.34
-2 12 -2 75.59 2.28
2 12 2 75.02 2.32
2 12 2 74.44 2.31
-2 12 -2 76.32 2.35
-4 -12 -2 34.54 1.08
-4 -12 -2 34.4 1.11
-4 -12 -2 34.98 1.05
4 -12 2 33.82 1.1
4 -12 2 34.24 1.11
4 12 2 32.88 1.11
4 12 2 34.36 1.21
4 12 2 33.52 1.11
-4 12 -2 35.16 1.05
4 12 2 33.33 1.12
4 12 2 34.95 1.08
-4 12 -2 35.87 1.14
-4 12 -2 33.87 1.13
-6 -12 -2 14.93 0.56
-6 -12 -2 15.9 0.48
6 -12 2 15.33 0.54
6 -12 2 16.11 0.56
-6 -12 -2 15.35 0.53
-6 12 -2 13.63 0.53
-6 12 -2 14.23 0.44
6 12 2 14.26 0.67
-6 12 -2 14.45 0.56
6 12 2 14.18 0.56
6 12 2 14.03 0.54
6 12 2 13.94 0.54
8 -12 2 5.73 0.3
-8 -12 -2 5.86 0.33
8 -12 2 5.98 0.29
-8 -12 -2 5.85 0.27
8 12 2 3.57 0.42
8 12 2 3.97 0.3
-8 12 -2 3.72 0.27
8 12 2 3.95 0.32
10 -12 2 2.41 0.21
10 -12 2 2.38 0.22
-10 -12 -2 2.01 0.22
-10 -12 -2 2.29 0.18
10 12 2 0.74 0.38
10 12 2 1.43 0.28
10 12 2 1.05 0.21
12 -12 2 5.34 0.32
-12 -12 -2 4.32 0.31
-12 -12 -2 4.99 0.37
12 12 2 5.57 0.44
-12 12 -2 5.44 0.37
12 12 2 5.33 0.6
12 12 2 5.37 0.4
-14 -12 -2 2.45 0.3
-14 -12 -2 2.17 0.23
14 12 2 1.53 0.27
-14 12 -2 1.86 0.15
14 12 2 1.19 0.53
-14 12 -2 1.97 0.12
-14 12 -2 1.68 0.24
-16 -12 -2 15.38 0.69
-16 -12 -2 16.31 0.64
-16 12 -2 10.6 0.52
16 12 2 10.57 0.54
16 12 2 8.27 0.87
-18 -12 -2 5.65 0.45
-18 -12 -2 6.01 0.43
-18 12 -2 7.29 0.44
18 12 2 5.62 0.78
18 12 2 7.14 0.47
-20 -12 -2 2.01 0.32
-20 -12 -2 1.75 0.34
20 12 2 1.19 0.68
-20 12 -2 1.96 0.33
20 12 2 2.26 0.31
-22 -12 -2 1.43 0.35
-22 -12 -2 1.49 0.39
-22 12 -2 1.81 0.35
22 12 2 1.12 0.81
-24 -12 -2 2.35 0.37
-24 -12 -2 2.72 0.42
24 12 2 1.93 0.83
-24 12 -2 1.97 0.38
-26 -12 -2 1.02 0.43
-26 -12 -2 1.15 0.37
-26 12 -2 0.26 0.39
-27 -13 2 2.52 0.44
-27 -13 2 1.87 0.45
27 13 -2 1.63 0.44
-27 13 2 2.07 0.31
-25 -13 2 1.57 0.41
-25 -13 2 2.25 0.42
-25 13 2 1.38 0.29
25 13 -2 2 0.45
-23 -13 2 1.52 0.37
-23 -13 2 2.38 0.39
23 13 -2 3.25 0.46
-23 13 2 2.37 0.29
-21 -13 2 0.1 0.32
-21 -13 2 -0.14 0.31
-21 13 2 0.47 0.21
21 13 -2 -0.11 0.62
21 13 -2 0.32 0.39
-19 -13 2 16.8 0.74
-19 -13 2 17.29 0.75
19 13 -2 18.77 0.89
-19 13 2 17.1 0.64
19 13 -2 15.22 1.24
-19 13 2 17.25 0.64
-17 -13 2 2.68 0.32
-17 -13 2 2.48 0.31
-17 13 2 1.69 0.16
17 13 -2 1.03 0.38
17 13 -2 0.93 0.56
-17 13 2 1.3 0.18
-15 -13 2 8.74 0.46
-15 -13 2 9.13 0.51
-15 13 2 10.6 0.42
15 13 -2 10.03 0.87
15 13 -2 10.7 0.67
-15 13 2 10.55 0.4
-13 -13 2 36.3 1.27
-13 -13 2 39.02 1.26
13 13 -2 35.45 1.29
-13 13 2 35.81 1.12
-13 13 2 36 1.11
13 13 -2 30.12 1.49
-13 13 2 35.05 1.1
-11 -13 2 15.49 0.62
-11 -13 2 15.94 0.6
11 -13 -2 15.95 0.57
11 13 -2 11.79 0.61
-11 13 2 11.72 0.42
11 13 -2 10.61 0.77
-11 13 2 11.79 0.44
-11 13 2 12.54 0.42
-9 -13 2 21.07 0.74
9 -13 -2 21.9 0.71
-9 -13 2 20.25 0.73
-9 13 2 23.45 0.75
-9 13 2 22.84 0.73
-9 13 2 23.96 0.74
9 13 -2 20.65 1
9 13 -2 22.18 0.88
-7 -13 2 8.01 0.35
-7 -13 2 7.75 0.37
7 -13 -2 8.06 0.33
-7 13 2 5.6 0.25
7 13 -2 5.15 0.41
-7 13 2 5.86 0.21
-7 13 2 5.26 0.39
7 13 -2 5.02 0.49
-7 13 2 5.56 0.23
5 -13 -2 0.9 0.08
5 -13 -2 0.71 0.13
-5 -13 2 0.78 0.13
5 -13 -2 0.92 0.07
-5 13 2 -0.06 0.05
-5 13 2 -0.09 0.18
-5 13 2 0.01 0.1
5 13 -2 0.3 0.25
-5 13 2 0.1 0.08
-5 13 2 0.09 0.04
5 13 -2 0.21 0.24
-3 -13 2 2.42 0.18
3 -13 -2 2.47 0.19
3 -13 -2 2.12 0.15
-3 -13 2 2.26 0.2
-3 -13 2 2.11 0.16
3 -13 -2 2.06 0.13
-3 -13 2 2.16 0.16
-3 13 2 3.92 0.2
3 13 -2 4.56 0.35
-3 13 2 4.22 0.22
-3 13 2 4.1 0.14
3 13 -2 3.9 0.33
-3 13 2 3.79 0.33
-3 13 2 4.17 0.17
-1 -13 2 8.7 0.3
1 -13 -2 8.86 0.32
1 -13 -2 8.27 0.34
-1 -13 2 8.44 0.36
1 -13 -2 8.8 0.33
-1 -13 2 9.12 0.35
-1 -13 2 9.32 0.31
-1 13 2 8.72 0.34
1 13 -2 9.59 0.45
-1 13 2 8.56 0.46
-1 13 2 9.07 0.36
-1 13 2 9.1 0.29
1 13 -2 9.14 0.43
-1 13 2 9.29 0.31
-1 -13 -2 13.46 0.44
-1 -13 -2 13.84 0.48
1 -13 2 13.6 0.48
-1 -13 -2 13.33 0.47
1 -13 2 13.93 0.5
-1 13 -2 16.38 0.51
1 13 2 14.92 0.49
1 13 2 14.76 0.63
1 13 2 14.95 0.53
-1 13 -2 15.73 0.59
-1 13 -2 15.26 0.6
1 13 2 14.52 0.54
-3 -13 -2 27.47 0.93
3 -13 2 28.72 0.95
-3 -13 -2 29.28 0.89
3 -13 2 28.8 0.93
3 -13 2 28.59 0.89
-3 -13 -2 29.25 0.91
3 13 2 26.11 0.87
3 13 2 26.49 0.98
-3 13 -2 25.59 0.91
3 13 2 26.73 0.83
3 13 2 25.98 0.89
3 13 2 25.45 0.88
-3 13 -2 27.01 0.82
-3 13 -2 27.43 0.91
-5 -13 -2 23.09 0.7
-5 -13 -2 22.53 0.73
5 -13 2 22.95 0.77
5 -13 2 21.71 0.75
-5 -13 -2 22.26 0.77
5 13 2 21.23 0.77
5 13 2 22.29 0.9
-5 13 -2 22.49 0.8
5 13 2 22.38 0.79
-5 13 -2 22.72 0.7
-5 13 -2 22.11 0.79
5 13 2 21.86 0.78
5 13 2 24.07 0.74
7 -13 2 6.66 0.32
-7 -13 -2 6.17 0.34
-7 -13 -2 6.55 0.29
-7 -13 -2 6.7 0.22
7 -13 2 6.18 0.32
-7 13 -2 5.66 0.35
7 13 2 5.15 0.38
7 13 2 5.31 0.51
7 13 2 5.92 0.35
-7 13 -2 5.79 0.33
9 -13 2 2.48 0.21
-9 -13 -2 2.67 0.19
-9 -13 -2 2.59 0.23
9 -13 2 2.69 0.22
9 13 2 1.53 0.29
9 13 2 1.9 0.41
9 13 2 1.73 0.23
-9 13 -2 1.95 0.21
11 -13 2 16.49 0.63
-11 -13 -2 16.56 0.66
11 -13 2 17.26 0.63
-11 -13 -2 17.8 0.62
11 13 2 9.64 0.77
11 13 2 11.15 0.62
11 13 2 12.05 0.53
-11 13 -2 10.94 0.48
13 -13 2 14.53 0.6
-13 -13 -2 13.63 0.62
-13 -13 -2 15.08 0.58
-13 13 -2 9.85 0.48
13 13 2 8.18 0.82
13 13 2 9.78 0.54
-15 -13 -2 16.54 0.66
-15 -13 -2 16.48 0.72
-15 13 -2 11.97 0.56
15 13 2 11.07 0.95
15 13 2 11.26 0.59
-17 -13 -2 4.49 0.35
-17 -13 -2 4.12 0.38
-17 13 -2 5.88 0.44
17 13 2 4.03 0.72
17 13 2 5.33 0.47
-19 -13 -2 6.02 0.43
-19 -13 -2 5.14 0.44
-19 13 -2 5.24 0.39
19 13 2 6.26 0.48
19 13 2 5.8 0.81
-21 -13 -2 3.96 0.37
-21 -13 -2 2.61 0.38
21 13 2 3.05 0.79
-21 13 -2 3.77 0.39
-23 -13 -2 2.25 0.35
-23 -13 -2 2.57 0.44
23 13 2 2.25 0.89
-23 13 -2 1.87 0.37
-25 -13 -2 0.35 0.39
-25 -13 -2 0.4 0.41
-25 13 -2 -0.69 0.33
25 13 2 -0.57 0.79
-27 -13 -2 3.38 0.5
-27 -13 -2 3.04 0.45
-27 13 -2 1.83 0.44
-26 -14 2 2.79 0.45
-26 -14 2 4.11 0.5
26 14 -2 2.85 0.5
-24 -14 2 7.59 0.54
-24 -14 2 6.03 0.51
-24 14 2 5.99 0.43
24 14 -2 5.92 0.56
-22 -14 2 2.2 0.37
-22 -14 2 2.15 0.38
22 14 -2 3.37 0.48
22 14 -2 3.39 0.88
-22 14 2 2.9 0.28
-20 -14 2 0.16 0.29
-20 -14 2 -0.34 0.31
20 14 -2 0.67 0.64
-20 14 2 0.36 0.2
20 14 -2 0.76 0.42
-18 -14 2 13.47 0.6
-18 -14 2 11.3 0.63
18 14 -2 12.84 1.05
18 14 -2 14.46 0.79
-18 14 2 13.58 0.53
-16 -14 2 3.99 0.33
-16 -14 2 4.22 0.35
-16 14 2 5.58 0.31
-16 14 2 6.14 0.31
16 14 -2 5.1 0.7
16 14 -2 5.64 0.48
-16 14 2 6.11 0.29
-14 -14 2 10.07 0.51
-14 -14 2 9.22 0.47
14 14 -2 9.16 0.93
-14 14 2 10.96 0.43
14 14 -2 10.63 0.63
-14 14 2 11.63 0.43
-14 14 2 11.61 0.41
-12 -14 2 44.72 1.46
12 -14 -2 45.09 1.43
-12 -14 2 44.05 1.47
-12 14 2 39.85 1.2
12 14 -2 32.14 1.55
12 14 -2 38.32 1.36
-12 14 2 38.84 1.21
-12 14 2 38.28 1.2
-10 -14 2 8.5 0.43
10 -14 -2 8.26 0.37
-10 -14 2 8.86 0.42
-10 14 2 10.5 0.37
10 14 -2 8.51 0.72
10 14 -2 9.72 0.61
-10 14 2 10.01 0.36
-10 14 2 10.16 0.38
8 -14 -2 42.26 1.31
-8 -14 2 40.58 1.33
-8 -14 2 40.38 1.33
8 14 -2 39.71 1.36
8 14 -2 35.3 1.45
-8 14 2 38.31 1.36
-8 14 2 40.25 1.21
-8 14 2 38.85 1.23
-8 14 2 41.24 1.23
6 -14 -2 3.04 0.22
-6 -14 2 3.06 0.23
-6 14 2 1.3 0.11
-6 14 2 1.38 0.11
-6 14 2 1.38 0.13
-6 14 2 1.14 0.25
6 14 -2 1.32 0.27
6 14 -2 1.19 0.31
-4 -14 2 11.87 0.44
4 -14 -2 12.56 0.4
4 -14 -2 12.22 0.41
-4 -14 2 11.95 0.48
4 -14 -2 12.33 0.46
-4 -14 2 12.28 0.45
-4 -14 2 12.77 0.45
-4 14 2 13.09 0.42
4 14 -2 13.36 0.58
-4 14 2 13.76 0.62
-4 14 2 13.02 0.46
4 14 -2 13.2 0.65
-4 14 2 13.57 0.47
-2 -14 2 7.26 0.28
-2 -14 2 7.22 0.27
2 -14 -2 7.09 0.32
2 -14 -2 7.45 0.29
2 -14 -2 6.86 0.27
-2 -14 2 7.5 0.32
-2 14 2 3.08 0.12
-2 14 2 3.19 0.19
-2 14 2 2.78 0.29
-2 14 2 2.98 0.21
-2 14 2 3.08 0.15
2 14 -2 2.67 0.27
2 14 -2 3.02 0.3
0 -14 -2 6.59 0.29
0 -14 -2 6.47 0.31
0 -14 2 6.62 0.3
0 -14 -2 6.61 0.26
0 -14 2 6.53 0.31
0 -14 2 6.15 0.21
0 14 2 3.29 0.14
0 14 -2 3.56 0.32
0 14 2 3.38 0.22
0 14 -2 3.47 0.31
0 14 2 3.31 0.24
0 14 2 3.36 0.15
0 14 2 3.3 0.32
2 -14 2 10.52 0.42
-2 -14 -2 10.62 0.41
-2 -14 -2 10.51 0.35
2 -14 2 10.36 0.41
-2 -14 -2 10.11 0.36
2 14 2 6.98 0.45
2 14 2 6.97 0.33
-2 14 -2 6.13 0.37
2 14 2 6.55 0.35
2 14 2 7.27 0.26
-2 14 -2 7.58 0.39
-2 14 -2 7.65 0.27
4 -14 2 37.97 1.21
4 -14 2 36.48 1.19
-4 -14 -2 36.99 1.2
-4 -14 -2 37.82 1.14
-4 -14 -2 36.57 1.17
4 14 2 31.51 1.11
-4 14 -2 33.26 1.13
4 14 2 34.66 1.12
4 14 2 33.4 1.11
-4 14 -2 34.7 1.04
4 14 2 33.3 1.22
4 14 2 33.94 1.06
-4 14 -2 34.94 1.15
-6 -14 -2 0.37 0.16
6 -14 2 0.33 0.15
-6 -14 -2 0.58 0.06
-6 -14 -2 0.43 0.12
6 -14 2 0.42 0.14
6 14 2 0.91 0.19
6 14 2 1.33 0.32
6 14 2 1.18 0.21
-6 14 -2 1.28 0.21
6 14 2 1.13 0.2
-6 14 -2 1.34 0.21
-6 14 -2 1.27 0.08
8 -14 2 2.43 0.22
-8 -14 -2 2.58 0.21
8 -14 2 1.93 0.19
-8 -14 -2 2.33 0.12
-8 -14 -2 2 0.22
-8 14 -2 1.59 0.23
8 14 2 1.37 0.38
8 14 2 1.5 0.28
-8 14 -2 1.23 0.21
8 14 2 1.59 0.24
10 -14 2 7.85 0.37
-10 -14 -2 7.42 0.36
-10 -14 -2 8.59 0.43
10 -14 2 7.45 0.38
-10 14 -2 4.6 0.34
10 14 2 4.54 0.56
10 14 2 5.68 0.41
10 14 2 6.23 0.5
-12 -14 -2 18.41 0.74
12 -14 2 19.12 0.72
12 -14 2 19.12 0.71
-12 -14 -2 19.33 0.69
12 14 2 13.49 0.61
12 14 2 13.02 0.67
-12 14 -2 12.29 0.56
12 14 2 12.78 0.97
-14 -14 -2 1.38 0.23
-14 -14 -2 2.16 0.3
-14 14 -2 0.58 0.25
14 14 2 0.56 0.29
14 14 2 0.89 0.61
-16 -14 -2 4.78 0.4
-16 -14 -2 5.37 0.4
16 14 2 4.31 0.71
16 14 2 5.38 0.49
-16 14 -2 6.2 0.45
-18 -14 -2 16.03 0.67
-18 -14 -2 16.36 0.76
-18 14 -2 15.13 0.66
18 14 2 13.38 1.13
18 14 2 14.91 0.7
-20 -14 -2 6.71 0.5
-20 -14 -2 7.64 0.54
20 14 2 5.53 0.86
-20 14 -2 6.35 0.45
20 14 2 7.37 0.52
-22 -14 -2 7.05 0.56
-22 -14 -2 5.57 0.48
22 14 2 4.47 0.87
-22 14 -2 4.46 0.41
-24 -14 -2 0.59 0.37
-24 -14 -2 0.69 0.42
-24 14 -2 1.04 0.37
24 14 2 0.34 0.8
-26 -14 -2 2.31 0.43
-26 -14 -2 2.49 0.48
26 14 2 2.15 1.02
-26 14 -2 1.01 0.39
-27 -15 2 2.35 0.46
-27 -15 2 3.01 0.5
27 15 -2 3.47 0.53
-25 -15 2 3.5 0.46
-25 -15 2 4.25 0.49
25 15 -2 2.31 0.48
-23 -15 2 3.19 0.43
-23 -15 2 3.64 0.44
23 15 -2 4.24 0.88
-23 15 2 3.48 0.31
23 15 -2 4.08 0.53
-21 -15 2 0.64 0.34
-21 -15 2 0.63 0.34
21 15 -2 0.96 0.7
-21 15 2 1.99 0.25
21 15 -2 2.79 0.48
-19 -15 2 -0.06 0.3
-19 -15 2 -0.28 0.31
-19 15 2 0.06 0.18
19 15 -2 0.39 0.36
19 15 -2 -0.32 0.58
-19 15 2 0.07 0.17
-17 -15 2 3.25 0.36
-17 -15 2 3.6 0.36
-17 15 2 3.74 0.28
17 15 -2 3.72 0.69
17 15 -2 3.74 0.47
-17 15 2 3.71 0.27
-15 -15 2 8.65 0.53
-15 -15 2 9.73 0.49
-15 15 2 10.5 0.4
15 15 -2 9.39 0.68
-15 15 2 10.1 0.38
-15 15 2 9.93 0.41
15 15 -2 7.74 0.8
-13 -15 2 6.89 0.44
-13 -15 2 6.98 0.44
13 15 -2 6.57 0.53
-13 15 2 6.67 0.3
-13 15 2 6.84 0.29
-13 15 2 6.87 0.31
13 15 -2 6.6 0.68
-11 -15 2 24 0.85
-11 -15 2 23.98 0.86
11 -15 -2 23.28 0.81
-11 15 2 18.23 0.61
-11 15 2 18.5 0.6
11 15 -2 16.83 0.83
11 15 -2 14.62 0.95
-11 15 2 18.67 0.6
9 -15 -2 13.65 0.52
-9 -15 2 13.95 0.56
-9 -15 2 13.6 0.55
-9 15 2 17.51 0.59
9 15 -2 14.52 0.88
-9 15 2 17.14 0.75
-9 15 2 17.28 0.57
-9 15 2 18.4 0.58
9 15 -2 18.13 0.77
-7 -15 2 35.67 1.17
7 -15 -2 35.97 1.15
-7 -15 2 35.08 1.16
7 15 -2 30.39 1.24
7 15 -2 30.51 1.12
-7 15 2 31.75 1.14
-7 15 2 31.23 0.97
-7 15 2 30.95 0.99
-7 15 2 31.42 1
5 -15 -2 46.07 1.44
-5 -15 2 45.72 1.44
-5 -15 2 44.41 1.43
5 -15 -2 43.81 1.39
-5 -15 2 47.33 1.46
-5 -15 2 45.48 1.47
-5 15 2 38.39 1.33
-5 15 2 37.57 1.16
5 15 -2 35.85 1.29
-5 15 2 38.39 1.2
-5 15 2 37.71 1.16
-5 15 2 37.94 1.18
5 15 -2 37.36 1.36
3 -15 -2 6.53 0.24
3 -15 -2 6.54 0.31
-3 -15 2 6.6 0.35
-3 -15 2 5.97 0.27
3 -15 -2 6 0.25
-3 -15 2 6.42 0.27
-3 -15 2 6.54 0.31
-3 15 2 4.29 0.15
-3 15 2 4.15 0.37
-3 15 2 4.02 0.24
3 15 -2 3.91 0.37
-3 15 2 3.96 0.22
3 15 -2 4.58 0.43
-1 -15 2 3.9 0.23
1 -15 -2 3.74 0.19
-1 -15 2 3.82 0.17
-1 -15 2 4.18 0.29
1 -15 -2 3.92 0.23
-1 -15 2 3.93 0.16
1 -15 -2 3.77 0.26
-1 15 2 4.78 0.42
-1 15 2 4.62 0.17
-1 15 2 4.53 0.25
1 15 -2 4.9 0.36
-1 15 2 4.25 0.27
1 15 -2 5.05 0.39
-1 15 2 4.92 0.19
1 -15 2 10.8 0.41
1 -15 2 10.6 0.43
-1 -15 -2 10.62 0.38
-1 -15 -2 10.4 0.41
-1 -15 -2 10.43 0.36
-1 15 -2 7.23 0.43
1 15 2 7.46 0.26
1 15 2 7.17 0.45
1 15 2 7.58 0.36
1 15 2 6.83 0.32
-1 15 -2 7.36 0.41
3 -15 2 17.81 0.62
-3 -15 -2 17.01 0.63
-3 -15 -2 18.04 0.57
-3 -15 -2 17.71 0.59
3 -15 2 18.26 0.65
3 -15 2 17.74 0.56
3 15 2 10.89 0.45
-3 15 -2 11.6 0.51
-3 15 -2 12.23 0.39
3 15 2 11.27 0.48
3 15 2 11.31 0.39
-3 15 -2 10.75 0.49
3 15 2 11.53 0.59
3 15 2 10.88 0.47
-5 -15 -2 13.4 0.41
-5 -15 -2 12.23 0.5
-5 -15 -2 12.62 0.45
5 -15 2 12.61 0.49
5 -15 2 12.42 0.5
5 15 2 11.24 0.62
-5 15 -2 10.71 0.5
5 15 2 10.76 0.48
5 15 2 10.29 0.49
-5 15 -2 10.46 0.35
-5 15 -2 10.59 0.49
5 15 2 11.09 0.49
-7 -15 -2 34.16 1.14
7 -15 2 33.32 1.12
-7 -15 -2 35.47 1.06
7 -15 2 34.34 1.14
-7 -15 -2 34.02 1.1
-7 15 -2 26.79 0.8
7 15 2 26.87 0.95
-7 15 -2 25.96 0.93
7 15 2 25.6 1.08
-7 15 -2 26.16 0.92
7 15 2 24.87 0.91
9 -15 2 18.53 0.69
-9 -15 -2 19.15 0.67
-9 -15 -2 18.39 0.71
-9 -15 -2 19.41 0.6
9 -15 2 18.55 0.68
9 15 2 15.87 0.69
-9 15 -2 14.45 0.6
9 15 2 15.2 0.86
9 15 2 14.93 0.63
-9 15 -2 14.03 0.64
-11 -15 -2 9.68 0.45
11 -15 2 10.55 0.46
11 -15 2 10.59 0.47
-11 -15 -2 10.46 0.54
11 15 2 7.1 0.47
11 15 2 6.43 0.51
11 15 2 5.31 0.61
-11 15 -2 6.72 0.4
13 -15 2 13.25 0.56
-13 -15 -2 13.56 0.63
-13 -15 -2 13.05 0.55
13 15 2 13.29 0.64
13 15 2 10.67 0.92
-13 15 -2 13.14 0.57
-15 -15 -2 18.29 0.78
-15 -15 -2 18.07 0.71
-15 15 -2 17.31 0.7
15 15 2 13.34 1.08
15 15 2 17.24 0.73
-17 -15 -2 14.73 0.73
-17 -15 -2 15.81 0.67
-17 15 -2 14.19 0.65
17 15 2 14.36 0.7
17 15 2 12.89 1.1
-19 -15 -2 11.4 0.61
-19 -15 -2 11.73 0.69
-19 15 -2 10.74 0.59
19 15 2 8.53 1.02
19 15 2 11.75 0.62
-21 -15 -2 12.82 0.69
-21 -15 -2 13.42 0.75
-21 15 -2 10.47 0.59
21 15 2 8.19 0.99
-23 -15 -2 0.49 0.36
-23 -15 -2 0.53 0.4
23 15 2 1.76 0.91
-23 15 -2 0.23 0.31
-25 -15 -2 0.82 0.43
-25 -15 -2 0.56 0.39
-25 15 -2 0.38 0.36
25 15 2 0.32 0.83
-26 -16 2 2.9 0.48
-26 -16 2 3.28 0.49
26 16 -2 3.41 0.54
-24 -16 2 1.12 0.4
-24 -16 2 0.78 0.41
-24 16 2 0.54 0.23
24 16 -2 1.04 0.46
-22 -16 2 2.61 0.4
-22 -16 2 2.7 0.41
22 16 -2 2.08 0.78
22 16 -2 1.83 0.47
-22 16 2 1.32 0.21
-20 -16 2 3.31 0.39
-20 -16 2 3.51 0.4
20 16 -2 3.4 0.51
-20 16 2 3.37 0.24
-20 16 2 3.02 0.26
20 16 -2 3.24 0.76
-18 -16 2 4.68 0.41
-18 -16 2 4.55 0.38
18 16 -2 3.43 0.7
-18 16 2 2.74 0.23
-18 16 2 3.04 0.22
18 16 -2 3.73 0.49
-16 -16 2 1.6 0.29
-16 -16 2 1.57 0.29
16 16 -2 1.15 0.64
-16 16 2 1.73 0.18
16 16 -2 1.67 0.39
-16 16 2 1.63 0.18
-14 -16 2 4.75 0.36
-14 -16 2 4.34 0.35
14 16 -2 2.71 0.6
14 16 -2 3.63 0.44
-14 16 2 4.13 0.23
-14 16 2 3.72 0.26
-14 16 2 3.86 0.25
-12 -16 2 8.46 0.47
-12 -16 2 8.73 0.48
12 -16 -2 8.9 0.42
12 16 -2 3.7 0.46
-12 16 2 4.53 0.24
-12 16 2 4.38 0.23
-12 16 2 4.39 0.25
12 16 -2 3.32 0.58
-10 -16 2 31.4 1.09
-10 -16 2 31.88 1.08
10 -16 -2 32.86 1.06
10 16 -2 21.02 1.15
-10 16 2 23.32 0.76
-10 16 2 23.14 0.74
-10 16 2 22.33 0.94
-10 16 2 24.26 0.75
10 16 -2 23.11 0.98
8 -16 -2 11.11 0.45
-8 -16 2 10.5 0.47
-8 -16 2 10.9 0.48
8 16 -2 10.83 0.73
-8 16 2 11.23 0.39
-8 16 2 10.93 0.6
8 16 -2 11.5 0.67
-8 16 2 11.89 0.42
-8 16 2 12.07 0.41
-6 -16 2 41.07 1.31
-6 -16 2 41.75 1.31
6 -16 -2 39.88 1.31
-6 16 2 32.35 1.17
6 16 -2 32.43 1.18
6 16 -2 32.07 1.27
-6 16 2 32.73 1.03
-6 16 2 31.89 1
-6 16 2 31.65 1.02
-6 16 2 32.06 0.99
4 -16 -2 15.64 0.58
-4 -16 2 17.04 0.57
4 -16 -2 16.27 0.52
-4 -16 2 16.18 0.59
-4 -16 2 16.94 0.56
4 -16 -2 16.37 0.52
-4 -16 2 16.24 0.63
-4 16 2 11 0.56
-4 16 2 10.88 0.4
4 16 -2 11.73 0.56
-4 16 2 10.4 0.42
-4 16 2 10.39 0.35
4 16 -2 11.96 0.65
-2 -16 2 17.57 0.57
-2 -16 2 16.92 0.57
2 -16 -2 17.24 0.58
2 -16 -2 17.29 0.62
-2 -16 2 17.48 0.65
-2 -16 2 17.06 0.61
2 -16 -2 18.08 0.57
2 16 -2 11.77 0.57
-2 16 2 13.01 0.45
-2 16 2 12.66 0.4
-2 16 2 12.6 0.6
-2 16 2 11.99 0.47
2 16 -2 12.45 0.59
0 -16 -2 3.62 0.24
0 -16 -2 3.47 0.25
0 -16 2 4.13 0.26
0 -16 2 3.6 0.27
0 -16 -2 3.89 0.2
0 16 2 3.95 0.4
0 16 -2 4.15 0.39
0 16 2 4.16 0.18
0 16 2 4.78 0.3
0 16 2 4.37 0.26
0 16 -2 5.01 0.4
-2 -16 -2 45.07 1.43
2 -16 2 45.68 1.45
2 -16 2 43.09 1.43
-2 -16 -2 46.36 1.39
-2 16 -2 35.13 1.23
2 16 2 36.3 1.12
2 16 2 35.87 1.29
2 16 2 35.03 1.18
2 16 2 36.38 1.21
-2 16 -2 36.76 1.24
2 16 2 35.79 1.17
-4 -16 -2 1.73 0.14
-4 -16 -2 1.28 0.1
4 -16 2 1.35 0.2
4 -16 2 0.97 0.17
-4 -16 -2 1.03 0.18
4 16 2 0.29 0.21
-4 16 -2 0.05 0.2
4 16 2 0.16 0.17
4 16 2 0.12 0.19
4 16 2 -0.21 0.29
-4 16 -2 0.09 0.21
6 -16 2 45.62 1.48
-6 -16 -2 46.73 1.42
6 -16 2 45.89 1.5
-6 -16 -2 46 1.49
-6 -16 -2 46.79 1.46
6 16 2 37.03 1.39
-6 16 -2 37.02 1.14
6 16 2 36.93 1.25
-6 16 -2 36.87 1.25
6 16 2 37.31 1.26
-6 16 -2 37.07 1.27
-8 -16 -2 34.6 1.15
8 -16 2 35.16 1.18
-8 -16 -2 35.68 1.1
-8 -16 -2 36.54 1.2
8 -16 2 35.67 1.17
8 16 2 28.22 0.99
-8 16 -2 27.1 0.98
-8 16 -2 27.39 1.02
-8 16 -2 27.7 0.85
8 16 2 27.04 1.18
8 16 2 29.12 1.01
-10 -16 -2 25.07 0.78
10 -16 2 24.95 0.87
10 -16 2 24.31 0.87
-10 -16 -2 25.56 0.9
-10 -16 -2 24.26 0.85
10 16 2 21.29 0.91
10 16 2 21.1 1.08
-10 16 -2 21.33 0.86
-10 16 -2 21.25 0.8
10 16 2 21.98 0.84
-12 -16 -2 15.94 0.63
-12 -16 -2 16.53 0.7
12 -16 2 17.65 0.68
12 -16 2 16.17 0.65
12 16 2 18.12 0.73
-12 16 -2 16.4 0.66
-12 16 -2 15.12 0.66
12 16 2 15.23 1
-14 -16 -2 6.94 0.51
14 -16 2 7.02 0.44
-14 -16 -2 6.55 0.42
14 16 2 7.11 0.53
-14 16 -2 6.11 0.43
14 16 2 5.49 0.73
-16 -16 -2 14.27 0.7
-16 -16 -2 13.25 0.62
16 16 2 11.41 0.62
-16 16 -2 11.24 0.56
16 16 2 9.09 1.01
-18 -16 -2 13.44 0.64
-18 -16 -2 13.54 0.71
18 16 2 10.24 1.11
-18 16 -2 12.13 0.61
18 16 2 13.18 0.68
-20 -16 -2 15.09 0.72
-20 -16 -2 14.94 0.78
-20 16 -2 11.33 0.62
20 16 2 11.1 1.16
20 16 2 12.09 0.66
-22 -16 -2 2.14 0.36
-22 -16 -2 3.02 0.43
22 16 2 2.54 0.83
-22 16 -2 2.9 0.39
-24 -16 -2 0.72 0.38
-24 -16 -2 1.29 0.43
24 16 2 2.11 0.89
-24 16 -2 0.94 0.37
26 16 2 1.5 1.02
-25 -17 2 5.36 0.53
-25 -17 2 5.85 0.54
25 17 -2 5.72 0.61
-23 -17 2 0.42 0.39
-23 -17 2 0.78 0.39
23 17 -2 0.33 0.85
23 17 -2 0.85 0.48
-21 -17 2 2.01 0.38
-21 -17 2 1.96 0.39
21 17 -2 1.64 0.74
21 17 -2 1.76 0.43
-21 17 2 1.57 0.21
-19 -17 2 9.22 0.62
-19 -17 2 8.98 0.6
-19 17 2 7.36 0.35
19 17 -2 7.82 0.72
-19 17 2 6.43 0.39
19 17 -2 6.78 0.9
-17 -17 2 19.32 0.83
-17 -17 2 19.84 0.84
17 17 -2 14.48 1.12
-17 17 2 15.33 0.58
-17 17 2 16.3 0.57
17 17 -2 17.19 0.89
-15 -17 2 0.41 0.27
-15 -17 2 -0.05 0.27
-15 17 2 0.02 0.13
15 17 -2 -0.27 0.35
15 17 -2 -0.02 0.53
-15 17 2 -0.15 0.14
-13 -17 2 1.08 0.26
13 -17 -2 1.16 0.23
-13 -17 2 0.7 0.24
13 17 -2 -0.47 0.48
13 17 -2 -0.1 0.39
-13 17 2 0.14 0.11
-13 17 2 0.07 0.13
-13 17 2 0.19 0.13
-11 -17 2 4.64 0.38
11 -17 -2 4.2 0.33
-11 -17 2 4.48 0.33
-11 17 2 2.41 0.16
-11 17 2 1.9 0.15
11 17 -2 1.29 0.5
-11 17 2 2 0.16
11 17 -2 1.65 0.41
-11 17 2 1.58 0.34
-9 -17 2 17.12 0.67
-9 -17 2 17.1 0.66
9 -17 -2 17.52 0.64
-9 17 2 10.6 0.4
9 17 -2 10.22 0.62
-9 17 2 10.13 0.37
-9 17 2 11.21 0.39
9 17 -2 10 0.77
-9 17 2 9.65 0.59
-7 -17 2 18.66 0.68
7 -17 -2 19.14 0.68
-7 -17 2 18.8 0.66
-7 17 2 14.93 0.52
-7 17 2 15.2 0.5
7 17 -2 14.57 0.82
-7 17 2 14.94 0.53
7 17 -2 15.7 0.72
-7 17 2 14.65 0.71
-7 17 2 15.1 0.48
-5 -17 2 13.03 0.63
-5 -17 2 14.86 0.53
-5 -17 2 14.8 0.59
-5 -17 2 14.62 0.55
5 -17 -2 15.21 0.56
5 17 -2 9.05 0.58
-5 17 2 8.35 0.33
-5 17 2 8.37 0.36
-5 17 2 8.53 0.29
-5 17 2 8.43 0.3
-5 17 2 8.19 0.52
5 17 -2 9.15 0.66
3 -17 -2 28.94 0.92
-3 -17 2 29.62 0.93
-3 -17 2 29.68 0.97
3 -17 -2 29.16 0.91
-3 -17 2 28.8 0.93
3 -17 -2 29.15 0.98
3 17 -2 23.28 0.92
-3 17 2 22.43 0.75
3 17 -2 22.79 0.88
-3 17 2 24.31 0.94
-3 17 2 21.98 0.71
-3 17 2 22.2 0.77
-1 -17 2 8.41 0.29
1 -17 -2 8.69 0.34
1 -17 -2 8.21 0.4
1 -17 -2 8.4 0.31
-1 -17 2 8.19 0.28
-1 -17 2 8.46 0.4
-1 -17 2 8.03 0.36
-1 17 2 11.61 0.39
-1 17 2 11.9 0.45
1 17 -2 12.5 0.61
1 17 -2 11.47 0.56
-1 17 2 11.23 0.61
-1 17 2 11.72 0.47
-1 -17 -2 16.08 0.58
1 -17 2 16.97 0.63
1 -17 2 16.33 0.59
-1 -17 -2 16.29 0.56
-1 -17 -2 16.09 0.54
-1 -17 -2 17.16 0.62
-1 17 -2 12.99 0.59
-1 17 -2 14.03 0.6
1 17 2 13.78 0.45
1 17 2 13.48 0.52
1 17 2 13.78 0.54
1 17 2 13.69 0.67
3 -17 2 44.37 1.42
-3 -17 -2 45.22 1.38
3 -17 2 44.05 1.44
-3 -17 -2 44.17 1.42
3 17 2 36.92 1.25
-3 17 -2 37.47 1.31
3 17 2 40.12 1.42
3 17 2 38.58 1.28
3 17 2 37.89 1.21
3 17 2 38.33 1.29
-3 17 -2 39.04 1.32
5 -17 2 11.91 0.53
-5 -17 -2 12.32 0.4
5 -17 2 11.79 0.5
-5 -17 -2 12.17 0.51
5 17 2 10.16 0.49
5 17 2 10.4 0.67
-5 17 -2 10.88 0.51
5 17 2 9.7 0.49
-5 17 -2 11.5 0.55
5 17 2 11.64 0.54
-7 -17 -2 41.1 1.33
-7 -17 -2 40.8 1.37
-7 -17 -2 42.11 1.29
7 -17 2 41.38 1.37
7 -17 2 43.14 1.37
7 17 2 36.8 1.31
7 17 2 38.18 1.46
-7 17 -2 38.35 1.32
-7 17 -2 37.86 1.16
7 17 2 38.45 1.29
-7 17 -2 36.75 1.28
-9 -17 -2 16.95 0.55
9 -17 2 16.55 0.64
-9 -17 -2 17.77 0.68
9 -17 2 17.05 0.66
-9 -17 -2 16.84 0.62
-9 17 -2 15.78 0.72
9 17 2 16.74 1
9 17 2 16.72 0.76
-9 17 -2 16.51 0.68
9 17 2 16.91 0.71
11 -17 2 6.97 0.41
-11 -17 -2 7.53 0.49
-11 -17 -2 6.8 0.38
-11 -17 -2 7.2 0.27
11 -17 2 7.01 0.41
11 17 2 5.65 0.66
-11 17 -2 7.15 0.45
11 17 2 7.09 0.47
11 17 2 6.51 0.55
-11 17 -2 7.65 0.51
13 -17 2 1.17 0.27
-13 -17 -2 1.22 0.23
-13 -17 -2 1.08 0.3
13 -17 2 1.69 0.29
-13 17 -2 0.18 0.23
13 17 2 1.01 0.34
13 17 2 0.65 0.55
-13 17 -2 0.33 0.25
-15 -17 -2 8.66 0.49
-15 -17 -2 8.54 0.57
15 17 2 7.48 0.6
15 17 2 5.76 0.78
-15 17 -2 6.98 0.49
-15 17 -2 8.02 0.47
-17 -17 -2 11.58 0.66
-17 -17 -2 10.34 0.58
17 17 2 10 0.64
17 17 2 8.69 0.94
-17 17 -2 8.62 0.56
-19 -17 -2 6.59 0.51
-19 -17 -2 5.69 0.46
19 17 2 3.58 0.79
-19 17 -2 3.68 0.37
19 17 2 4.73 0.44
-21 -17 -2 3.56 0.44
-21 -17 -2 3.65 0.4
-21 17 -2 3.52 0.39
21 17 2 3.48 0.85
-23 -17 -2 2.42 0.46
-23 -17 -2 3.12 0.41
23 17 2 2.94 0.89
-23 17 -2 2.23 0.38
-25 -17 -2 0.39 0.45
-25 -17 -2 0.29 0.36
25 17 2 1.32 0.98
-25 17 -2 -0.39 0.36
-24 -18 2 10.03 0.75
-24 -18 2 9.35 0.76
24 18 -2 8.44 1.18
24 18 -2 10.66 0.86
-22 -18 2 0.63 0.39
-22 -18 2 0.35 0.37
22 18 -2 1.14 0.84
22 18 -2 1.89 0.51
-20 -18 2 0.84 0.34
-20 -18 2 1.28 0.36
20 18 -2 1.46 0.48
20 18 -2 0.59 0.68
-20 18 2 1.46 0.18
-18 -18 2 8.57 0.6
-18 -18 2 8.12 0.58
18 18 -2 7.49 0.94
-18 18 2 8.21 0.36
18 18 -2 7.66 0.64
-16 -18 2 17.65 0.78
-16 -18 2 18.61 0.78
16 18 -2 18.38 0.87
-16 18 2 18.15 0.61
16 18 -2 14.28 1.21
-16 18 2 16.97 0.62
-14 -18 2 0.85 0.29
-14 -18 2 1.12 0.28
14 18 -2 1.14 0.56
-14 18 2 0.85 0.15
14 18 -2 0.61 0.44
-14 18 2 1 0.15
12 -18 -2 6.09 0.38
-12 -18 2 6.34 0.43
-12 -18 2 5.97 0.44
-12 18 2 3.98 0.24
-12 18 2 4.48 0.24
-12 18 2 3.87 0.23
-12 18 2 3.95 0.45
12 18 -2 4.21 0.46
12 18 -2 3.13 0.6
-10 -18 2 0.7 0.22
-10 -18 2 0.67 0.22
10 -18 -2 1.01 0.22
-10 18 2 0.32 0.11
-10 18 2 0.26 0.13
-10 18 2 0.22 0.11
10 18 -2 0.54 0.36
10 18 -2 -0.19 0.44
-10 18 2 0.16 0.3
8 -18 -2 16.95 0.64
-8 -18 2 17.41 0.65
8 18 -2 9.41 0.82
-8 18 2 11.23 0.62
-8 18 2 10.74 0.42
8 18 -2 10.67 0.64
-8 18 2 10.72 0.39
-8 18 2 10.63 0.38
-6 -18 2 17.42 0.62
6 -18 -2 16.7 0.64
-6 -18 2 17.54 0.63
-6 -18 2 17.16 0.67
-6 18 2 10.75 0.43
-6 18 2 10.67 0.38
6 18 -2 11.12 0.62
-6 18 2 11.05 0.4
-6 18 2 10.84 0.65
6 18 -2 10.62 0.77
-4 -18 2 1.21 0.14
-4 -18 2 1.35 0.23
4 -18 -2 1.2 0.19
-4 -18 2 1.02 0.15
-4 -18 2 1.09 0.19
-4 18 2 0.42 0.07
-4 18 2 0.45 0.13
4 18 -2 0.44 0.33
-4 18 2 0.48 0.16
4 18 -2 0.39 0.3
-4 18 2 0.32 0.31
2 -18 -2 23.3 0.75
2 -18 -2 23.42 0.82
-2 -18 2 23.27 0.75
-2 -18 2 22.86 0.83
2 -18 -2 23.8 0.75
-2 -18 2 23.41 0.74
-2 -18 2 23.38 0.8
-2 18 2 27.7 0.93
2 18 -2 28.22 1.09
2 18 -2 27.01 1.02
-2 18 2 27.65 0.86
-2 18 2 28.26 0.91
-2 18 2 27.1 1.07
0 -18 -2 11.87 0.45
0 -18 2 12.24 0.53
0 -18 -2 12.06 0.43
0 -18 2 11.21 0.46
0 -18 -2 11.99 0.43
0 -18 -2 12.22 0.51
0 18 2 9.06 0.4
0 18 -2 9.6 0.56
0 18 2 9.23 0.58
0 18 2 8.97 0.32
0 18 -2 9.04 0.51
0 18 2 9.21 0.44
2 -18 2 64.18 2.08
-2 -18 -2 65.71 2.08
2 -18 2 66.01 2.06
-2 -18 -2 65.19 2.05
-2 -18 -2 65.58 2.01
2 18 2 62.02 2.05
2 18 2 57.57 1.92
-2 18 -2 59.86 1.95
-2 18 -2 60.15 1.96
2 18 2 59.79 1.89
2 18 2 58.72 1.91
2 18 2 59.18 1.84
-4 -18 -2 16.99 0.63
-4 -18 -2 16.67 0.55
4 -18 2 16.45 0.64
-4 -18 -2 16.85 0.58
4 -18 2 16.79 0.63
4 18 2 13.85 0.76
4 18 2 13.7 0.6
-4 18 -2 14.12 0.65
4 18 2 14.18 0.62
4 18 2 13.74 0.58
-4 18 -2 14.18 0.65
-6 -18 -2 20.52 0.7
6 -18 2 20.13 0.74
-6 -18 -2 20.41 0.65
6 -18 2 20.22 0.75
-6 -18 -2 20.08 0.75
-6 18 -2 21.54 0.81
6 18 2 20.83 0.83
-6 18 -2 21.35 0.85
6 18 2 20.46 0.8
6 18 2 21.33 0.98
8 -18 2 11.79 0.52
-8 -18 -2 10.61 0.36
-8 -18 -2 10.15 0.52
-8 -18 -2 10.2 0.44
8 -18 2 10.39 0.47
-8 18 -2 10.12 0.5
-8 18 -2 9.34 0.55
8 18 2 9.97 0.55
8 18 2 9.4 0.75
8 18 2 10.01 0.55
-10 -18 -2 7.57 0.48
10 -18 2 6.16 0.39
-10 -18 -2 6.59 0.37
10 -18 2 6.99 0.41
-10 -18 -2 6.88 0.26
-10 18 -2 7.12 0.51
-10 18 -2 6.92 0.46
10 18 2 6.03 0.46
10 18 2 5.73 0.48
10 18 2 6.32 0.68
-12 -18 -2 -0.11 0.21
12 -18 2 0.59 0.26
-12 -18 -2 0.54 0.28
12 -18 2 0.29 0.24
-12 18 -2 0.76 0.31
12 18 2 0.61 0.53
-12 18 -2 0.64 0.24
12 18 2 0.74 0.34
-12 18 -2 1.15 0.28
-14 -18 -2 8.68 0.57
14 -18 2 7.7 0.5
-14 -18 -2 9.17 0.48
14 18 2 4.74 0.74
14 18 2 5.44 0.47
-14 18 -2 5.92 0.45
-14 18 -2 5.06 0.43
-16 -18 -2 2.96 0.37
-16 -18 -2 3.37 0.34
-16 18 -2 2.16 0.31
-16 18 -2 1.93 0.32
16 18 2 2.19 0.39
16 18 2 1.79 0.68
-18 -18 -2 0.99 0.31
-18 -18 -2 1.54 0.37
18 18 2 0.04 0.75
-18 18 -2 0.21 0.29
-18 18 -2 0.3 0.27
18 18 2 0.73 0.35
-20 -18 -2 1.65 0.35
-20 -18 -2 2 0.4
20 18 2 0.47 0.73
-20 18 -2 1.37 0.33
20 18 2 2.16 0.4
-20 18 -2 1.64 0.33
-22 -18 -2 3.52 0.46
-22 -18 -2 2.39 0.39
-22 18 -2 2.62 0.39
22 18 2 2.58 0.87
-24 -18 -2 1.33 0.42
-24 -18 -2 1.53 0.46
24 18 2 2.28 0.99
-24 18 -2 1.43 0.39
25 19 -2 8.78 1.16
-23 -19 2 13.52 0.81
-23 -19 2 14.03 0.81
23 19 -2 12.66 0.92
23 19 -2 12.46 1.32
-21 -19 2 5.06 0.48
-21 -19 2 4.8 0.47
21 19 -2 4 0.92
21 19 -2 4.97 0.55
-19 -19 2 5.62 0.48
-19 -19 2 6.37 0.47
-19 19 2 6.06 0.32
19 19 -2 4.73 0.82
19 19 -2 6.01 0.6
-17 -19 2 4.49 0.42
-17 -19 2 4.65 0.41
-17 19 2 4.25 0.26
17 19 -2 3.17 0.78
17 19 -2 3.97 0.51
-15 -19 2 20.16 0.82
-15 -19 2 19.68 0.83
15 19 -2 14.85 1.12
-15 19 2 18.21 0.61
15 19 -2 18.46 0.96
-15 19 2 18.11 0.95
13 -19 -2 10.01 0.49
-13 -19 2 9.29 0.55
-13 -19 2 9.02 0.54
-13 19 2 9.88 0.41
13 19 -2 8.06 0.85
-13 19 2 9.44 0.72
-13 19 2 9.8 0.38
13 19 -2 9.3 0.68
-11 -19 2 7.35 0.45
-11 -19 2 7.23 0.44
11 -19 -2 8.59 0.43
11 19 -2 5.17 0.71
-11 19 2 5.32 0.51
-11 19 2 4.88 0.25
-11 19 2 5.43 0.28
11 19 -2 6.56 0.57
-11 19 2 5.47 0.26
-9 -19 2 12.48 0.55
-9 -19 2 12.91 0.52
9 -19 -2 13.79 0.55
-9 19 2 11.32 0.41
9 19 -2 9.66 0.81
9 19 -2 10.39 0.68
-9 19 2 11.23 0.66
-9 19 2 11.17 0.39
-9 19 2 11.3 0.43
-7 -19 2 1.96 0.22
-7 -19 2 1.47 0.2
7 -19 -2 1.34 0.22
-7 -19 2 1.45 0.27
-7 19 2 0.36 0.34
7 19 -2 0.56 0.46
-7 19 2 0.15 0.14
-7 19 2 0.46 0.12
-7 19 2 0.2 0.1
7 19 -2 0.26 0.34
-5 -19 2 7.2 0.45
5 -19 -2 7.38 0.37
-5 -19 2 7.45 0.34
-5 -19 2 6.62 0.37
-5 19 2 5.93 0.3
5 19 -2 5.59 0.52
-5 19 2 6.54 0.52
5 19 -2 6.06 0.66
-5 19 2 6.51 0.33
3 -19 -2 13.13 0.45
3 -19 -2 14.13 0.46
-3 -19 2 14.5 0.49
-3 -19 2 15.21 0.55
3 -19 -2 13.57 0.55
-3 19 2 18.06 0.62
3 19 -2 17.29 0.77
3 19 -2 17.6 0.82
-3 19 2 18.14 0.81
-3 19 2 17.22 0.65
1 -19 -2 13.93 0.5
-1 -19 2 14.63 0.59
1 -19 -2 14.35 0.59
1 -19 -2 14.77 0.5
-1 -19 2 14.39 0.54
-1 19 2 11.84 0.5
1 19 -2 10.96 0.6
-1 19 2 12.47 0.67
1 19 -2 12.24 0.64
-1 19 2 12.1 0.48
-1 -19 -2 85.51 2.62
1 -19 2 83.43 2.68
-1 -19 -2 87.27 2.68
1 -19 2 85.94 2.66
-1 -19 -2 84.03 2.65
-1 -19 -2 84.93 2.64
-1 19 -2 78.85 2.57
1 19 2 78.71 2.51
-1 19 -2 82.99 2.61
1 19 2 77.49 2.53
1 19 2 82.81 2.56
1 19 2 80.02 2.65
-3 -19 -2 7.91 0.3
-3 -19 -2 7.55 0.38
3 -19 2 7.34 0.41
3 -19 2 7.57 0.37
3 19 2 8.49 0.5
3 19 2 7.99 0.44
-3 19 -2 7.39 0.48
-3 19 -2 8.38 0.52
3 19 2 7.97 0.47
3 19 2 7.55 0.61
5 -19 2 2 0.23
-5 -19 -2 2.13 0.16
-5 -19 -2 1.98 0.23
5 -19 2 2.24 0.26
-5 -19 -2 2.13 0.18
5 19 2 3.61 0.48
5 19 2 3.09 0.32
5 19 2 3.72 0.36
-5 19 -2 3.72 0.36
-5 19 -2 3.81 0.38
-7 -19 -2 7.6 0.43
-7 -19 -2 7.69 0.28
7 -19 2 8.15 0.4
7 -19 2 7.85 0.46
-7 -19 -2 6.99 0.36
-7 19 -2 5.7 0.47
7 19 2 6.46 0.68
7 19 2 6 0.44
-7 19 -2 5.31 0.43
7 19 2 5.98 0.51
-9 -19 -2 11.34 0.56
-9 -19 -2 10.54 0.39
9 -19 2 9.89 0.49
9 -19 2 10.92 0.51
-9 -19 -2 10.56 0.47
-9 19 -2 8.82 0.51
9 19 2 7.84 0.61
9 19 2 8.24 0.56
-9 19 -2 8.25 0.52
9 19 2 7.78 0.79
-11 -19 -2 2.41 0.31
-11 -19 -2 2.22 0.25
11 -19 2 2.74 0.31
11 -19 2 2.17 0.29
11 19 2 3.69 0.41
-11 19 -2 2.62 0.33
-11 19 -2 2.8 0.35
11 19 2 1.79 0.58
-13 -19 -2 6.95 0.52
-13 -19 -2 5.42 0.43
13 -19 2 6.03 0.45
13 -19 2 6.41 0.45
-13 19 -2 3.89 0.43
13 19 2 4.74 0.47
-13 19 -2 4.74 0.38
13 19 2 3.34 0.68
-13 19 -2 4.4 0.35
-15 -19 -2 5.21 0.37
-15 -19 -2 5.37 0.43
-15 19 -2 4.49 0.48
15 19 2 4.05 0.45
15 19 2 3.33 0.81
-15 19 -2 4.29 0.37
-15 19 -2 4.69 0.39
-17 -19 -2 1.27 0.31
-17 -19 -2 1.01 0.35
17 19 2 0.45 0.68
-17 19 -2 1.31 0.32
-17 19 -2 1.08 0.29
17 19 2 1.16 0.39
-19 -19 -2 4 0.41
-19 -19 -2 4.35 0.46
19 19 2 2.16 0.76
-19 19 -2 3.05 0.38
-19 19 -2 2.79 0.36
19 19 2 3.28 0.42
-21 -19 -2 1.28 0.41
-21 -19 -2 1.56 0.37
21 19 2 0.49 0.77
-21 19 -2 0.34 0.33
-23 -19 -2 0.06 0.37
-23 -19 -2 1.88 0.46
-23 19 -2 0.72 0.36
23 19 2 1.33 0.85
-24 -20 2 11.89 0.8
-24 -20 2 11.6 0.82
24 20 -2 11.33 0.92
24 20 -2 9.59 1.23
-22 -20 2 4.59 0.51
-22 -20 2 3.87 0.47
22 20 -2 4.52 0.59
22 20 -2 4.59 0.91
-20 -20 2 6.09 0.5
-20 -20 2 6.9 0.51
20 20 -2 6.55 0.93
20 20 -2 7.18 0.66
-18 -20 2 10.61 0.66
-18 -20 2 9.99 0.64
18 20 -2 7.87 0.9
18 20 -2 8.16 0.71
-16 -20 2 3.53 0.37
-16 -20 2 3.74 0.4
16 20 -2 3.19 0.53
-16 20 2 3.08 0.23
-16 20 2 3.22 0.5
16 20 -2 2.42 0.75
-14 -20 2 12.86 0.62
14 -20 -2 13.23 0.58
-14 -20 2 11.93 0.64
-14 20 2 11.4 0.81
-14 20 2 12.21 0.44
14 20 -2 10.38 0.99
14 20 -2 11.16 0.75
12 -20 -2 6.28 0.42
-12 -20 2 6.34 0.46
-12 -20 2 5.66 0.43
12 20 -2 6.55 0.56
-12 20 2 7.14 0.32
-12 20 2 7.55 0.62
12 20 -2 5.92 0.78
-10 -20 2 12.02 0.51
-10 -20 2 12 0.55
10 -20 -2 12.09 0.52
-10 20 2 8.95 0.63
-10 20 2 8.75 0.37
10 20 -2 7.53 0.65
10 20 -2 7.86 0.82
-10 20 2 8.74 0.35
8 -20 -2 9.58 0.47
-8 -20 2 9.94 0.53
-8 -20 2 10.19 0.46
-8 -20 2 9.96 0.45
8 20 -2 8.22 0.7
-8 20 2 8.28 0.32
-8 20 2 8.66 0.35
-8 20 2 8.34 0.37
8 20 -2 8.59 0.84
-8 20 2 9.01 0.61
-6 -20 2 5.37 0.32
6 -20 -2 5.97 0.38
-6 -20 2 5.39 0.34
-6 -20 2 5.23 0.4
6 20 -2 4.09 0.52
6 20 -2 3.2 0.45
-6 20 2 3.94 0.45
-6 20 2 3.92 0.2
-6 20 2 3.91 0.26
-6 20 2 3.73 0.29
-4 -20 2 42.07 1.35
-4 -20 2 41.49 1.39
4 -20 -2 41.31 1.37
-4 -20 2 41.26 1.31
4 20 -2 42 1.53
-4 20 2 41.83 1.31
-4 20 2 41.99 1.49
-4 20 2 39.76 1.33
4 20 -2 39.57 1.45
-2 -20 2 25.25 0.81
-2 -20 2 26.61 0.89
-2 -20 2 25.78 0.94
2 -20 -2 26.01 0.89
2 -20 -2 25.25 0.82
-2 20 2 25.09 0.88
2 20 -2 25.29 1.06
-2 20 2 25.81 0.86
2 20 -2 24.96 0.98
-2 20 2 25.63 1.04
0 -20 -2 43.55 1.39
0 -20 2 42.54 1.46
0 -20 -2 44.71 1.46
0 -20 2 46.06 1.44
0 20 2 43.46 1.42
0 20 -2 43.05 1.52
0 20 2 44.06 1.4
0 20 2 41.7 1.45
0 20 2 43.26 1.56
0 20 -2 42.44 1.48
2 -20 2 16.11 0.66
2 -20 2 15.66 0.6
-2 -20 -2 16.51 0.54
-2 -20 -2 15.45 0.66
-2 -20 -2 15.82 0.59
2 20 2 12.96 0.63
-2 20 -2 13.29 0.68
2 20 2 12.97 0.79
-2 20 -2 13.4 0.63
2 20 2 12.62 0.55
2 20 2 12.71 0.58
-4 -20 -2 4.89 0.34
4 -20 2 4.15 0.33
4 -20 2 4.87 0.36
-4 -20 -2 4.63 0.22
4 20 2 4.37 0.38
4 20 2 3.53 0.35
-4 20 -2 4.71 0.41
-4 20 -2 4.12 0.41
4 20 2 3.96 0.49
4 20 2 3.85 0.31
-6 -20 -2 13.66 0.46
6 -20 2 14.03 0.58
-6 -20 -2 13.69 0.52
6 -20 2 13.71 0.58
-6 -20 -2 12.73 0.58
-6 20 -2 10.46 0.59
6 20 2 9.28 0.59
6 20 2 9.7 0.54
-6 20 -2 9.77 0.59
6 20 2 10.76 0.75
8 -20 2 34.26 1.15
-8 -20 -2 33.16 1.11
8 -20 2 33.73 1.17
-8 -20 -2 32.99 1.16
8 20 2 26.27 1.22
-8 20 -2 26.34 0.98
8 20 2 25.45 1.05
-8 20 -2 27.03 1.02
8 20 2 26.33 0.99
-10 -20 -2 11.93 0.52
-10 -20 -2 12.79 0.61
10 -20 2 12.18 0.61
10 -20 2 11.55 0.55
-10 20 -2 7.9 0.57
10 20 2 8.28 0.6
-10 20 -2 8.23 0.55
10 20 2 8.01 0.8
-12 -20 -2 7.62 0.52
12 -20 2 7.49 0.46
-12 -20 -2 6.77 0.45
12 -20 2 6.99 0.47
-12 20 -2 5.02 0.41
-12 20 -2 5.32 0.38
12 20 2 4.6 0.71
12 20 2 5.69 0.5
-12 20 -2 4.82 0.46
14 -20 2 10.95 0.58
14 -20 2 11.56 0.63
-14 -20 -2 10.38 0.55
-14 -20 -2 11.41 0.63
-14 20 -2 10.7 0.59
14 20 2 8.38 0.89
-14 20 -2 9.16 0.66
-14 20 -2 9.16 0.55
14 20 2 9.65 0.69
-16 -20 -2 1.57 0.3
-16 -20 -2 2.25 0.38
-16 20 -2 1.63 0.4
-16 20 -2 1.25 0.33
16 20 2 1.65 0.42
-16 20 -2 1.41 0.31
16 20 2 1.26 0.72
-18 -20 -2 4.54 0.46
-18 -20 -2 3.74 0.39
-18 20 -2 3.11 0.37
-18 20 -2 3.07 0.39
18 20 2 3.3 0.45
18 20 2 1.99 0.77
-20 -20 -2 0.74 0.41
-20 -20 -2 0.87 0.36
-20 20 -2 0.53 0.4
20 20 2 0.68 0.77
-20 20 -2 0.69 0.33
20 20 2 1.61 0.62
-22 -20 -2 1.66 0.44
-22 -20 -2 1.53 0.39
22 20 2 1.54 0.84
-22 20 -2 0.34 0.35
-23 -21 2 3.8 0.48
-23 -21 2 4.89 0.53
23 21 -2 3.88 0.56
23 21 -2 3.24 0.91
-21 -21 2 1.39 0.4
-21 -21 2 0.82 0.42
21 21 -2 1.17 0.83
21 21 -2 1.41 0.54
-19 -21 2 5.43 0.48
-19 -21 2 4.7 0.45
19 21 -2 6.41 0.62
19 21 -2 5.67 0.88
-19 21 2 6.01 0.68
-17 -21 2 5.11 0.44
-17 -21 2 5.04 0.46
-17 21 2 3.82 0.54
17 21 -2 3.48 0.5
17 21 -2 2.91 0.8
-15 -21 2 2.6 0.34
-15 -21 2 2.48 0.37
15 21 -2 1.81 0.71
15 21 -2 1.75 0.52
-15 21 2 2.43 0.18
-15 21 2 1.81 0.5
-13 -21 2 8.63 0.54
13 -21 -2 8.95 0.5
-13 -21 2 9.14 0.56
13 21 -2 6 0.61
-13 21 2 6.76 0.31
-13 21 2 7.19 0.71
13 21 -2 5.46 0.76
-11 -21 2 7.86 0.42
-11 -21 2 8.45 0.49
11 -21 -2 8.34 0.47
11 21 -2 5.8 0.71
-11 21 2 6.77 0.32
-11 21 2 6.14 0.59
11 21 -2 7.26 0.66
-9 -21 2 1.57 0.24
9 -21 -2 2.25 0.28
-9 -21 2 1.64 0.32
-9 -21 2 2.15 0.25
-9 21 2 2.11 0.4
9 21 -2 2.63 0.44
-9 21 2 2.31 0.18
-9 21 2 2.35 0.2
9 21 -2 1.93 0.59
-7 -21 2 23.43 0.88
-7 -21 2 22.92 0.82
7 -21 -2 23.04 0.84
-7 -21 2 22.84 0.81
7 21 -2 17.15 0.89
7 21 -2 15.65 0.95
-7 21 2 16.87 0.61
-7 21 2 17 0.83
-7 21 2 16.91 0.6
5 -21 -2 15.2 0.6
-5 -21 2 15.44 0.64
-5 -21 2 13.64 0.58
-5 -21 2 15.13 0.54
5 21 -2 11.14 0.69
-5 21 2 11.64 0.47
5 21 -2 11.76 0.84
-5 21 2 11.84 0.5
-5 21 2 13.33 0.76
-3 -21 2 10.48 0.38
-3 -21 2 10.76 0.48
-3 -21 2 10.9 0.52
3 -21 -2 10.29 0.48
-3 21 2 9.54 0.42
3 21 -2 9.58 0.66
3 21 -2 8.45 0.6
-3 21 2 9.45 0.64
-3 21 2 9.79 0.46
-1 -21 2 17.11 0.65
-1 -21 2 17.33 0.71
1 -21 -2 16.48 0.58
1 -21 -2 17.75 0.69
-1 21 2 15.76 0.6
-1 21 2 15.89 0.8
-1 21 2 15.19 0.64
-1 21 2 16.17 0.72
1 21 -2 16.23 0.78
1 21 -2 14.95 0.73
1 -21 2 15.67 0.66
-1 -21 -2 16.09 0.66
-1 -21 -2 16.52 0.56
1 -21 2 16.45 0.63
-1 -21 -2 15.5 0.58
-1 21 -2 12.96 0.7
1 21 2 11.86 0.56
-1 21 -2 12.06 0.64
1 21 2 12.13 0.59
1 21 2 11.97 0.53
1 21 2 12.55 0.8
-3 -21 -2 3.66 0.25
3 -21 2 4.08 0.3
-3 -21 -2 3.33 0.34
-3 -21 -2 3.09 0.21
3 -21 2 2.85 0.3
3 21 2 4.2 0.53
3 21 2 3.52 0.37
3 21 2 2.94 0.29
-3 21 -2 3.79 0.41
-3 21 -2 3.85 0.41
3 21 2 3.02 0.34
5 -21 2 6.6 0.42
-5 -21 -2 6.22 0.39
-5 -21 -2 6.21 0.27
5 -21 2 6.81 0.42
5 21 2 4.53 0.56
5 21 2 5.44 0.43
-5 21 -2 6.16 0.53
5 21 2 5.58 0.43
-5 21 -2 5.45 0.46
-7 -21 -2 20.05 0.71
-7 -21 -2 19.5 0.77
7 -21 2 20.51 0.78
7 -21 2 19.97 0.75
7 21 2 15.23 0.95
7 21 2 16.45 0.76
-7 21 -2 16.66 0.76
7 21 2 15.24 0.78
-7 21 -2 15.49 0.71
9 -21 2 38.4 1.29
-9 -21 -2 38.47 1.29
9 -21 2 37.44 1.29
-9 -21 -2 36.16 1.24
-9 21 -2 30.62 1.13
-9 21 -2 31.51 1.18
9 21 2 29.07 1.45
9 21 2 29.46 1.16
11 -21 2 9.4 0.56
11 -21 2 9.88 0.52
-11 -21 -2 8.75 0.48
-11 -21 -2 9.35 0.55
-11 21 -2 6.13 0.48
-11 21 -2 7.02 0.53
11 21 2 7.31 0.62
11 21 2 4.47 0.72
13 -21 2 6.05 0.44
-13 -21 -2 5.8 0.43
-13 -21 -2 4.92 0.36
13 -21 2 5.9 0.42
13 21 2 4.08 0.75
13 21 2 4.23 0.49
-13 21 -2 4.78 0.38
-13 21 -2 4.95 0.42
-13 21 -2 5.33 0.57
-15 -21 -2 4.36 0.41
-15 -21 -2 3.65 0.35
-15 21 -2 2.95 0.46
15 21 2 3.45 0.48
15 21 2 2.94 0.77
-15 21 -2 3.29 0.35
-15 21 -2 4 0.41
-17 -21 -2 3.38 0.42
-17 -21 -2 2.73 0.36
17 21 2 2.48 0.44
-17 21 -2 1.96 0.34
-17 21 -2 1.89 0.41
-17 21 -2 2.18 0.37
17 21 2 1.14 0.75
-19 -21 -2 1.03 0.35
-19 -21 -2 1.79 0.42
19 21 2 2.57 0.46
19 21 2 1.78 0.81
-19 21 -2 1.36 0.46
-19 21 -2 0.96 0.32
-19 21 -2 1.52 0.39
-21 -21 -2 3.86 0.5
-21 -21 -2 3.78 0.44
21 21 2 3.09 0.89
-21 21 -2 2.45 0.39
-22 -22 2 4.2 0.51
-22 -22 2 3.52 0.47
22 22 -2 3.58 0.61
-22 22 2 2.78 0.66
22 22 -2 3.44 0.98
-20 -22 2 0.26 0.39
-20 -22 2 0.45 0.38
-20 22 2 -0.24 0.55
20 22 -2 1.61 0.76
20 22 -2 0.51 0.51
-18 -22 2 4.93 0.45
-18 -22 2 5.66 0.47
-18 22 2 5.26 0.62
18 22 -2 6.24 0.6
18 22 -2 5 0.91
-16 -22 2 0.23 0.35
-16 -22 2 0.82 0.32
16 22 -2 0.71 0.46
16 22 -2 0.47 0.71
-16 22 2 0.31 0.44
-14 -22 2 1.64 0.32
14 -22 -2 2.34 0.3
-14 -22 2 1.77 0.32
-14 22 2 1.91 0.5
14 22 -2 2.54 0.49
-14 22 2 2.13 0.18
14 22 -2 1.17 0.71
-12 -22 2 5.04 0.37
12 -22 -2 5.28 0.38
-12 -22 2 4.64 0.33
-12 22 2 2.28 0.19
-12 22 2 1.68 0.43
12 22 -2 2.36 0.48
12 22 -2 1.53 0.62
-10 -22 2 3.5 0.3
-10 -22 2 4.79 0.35
10 -22 -2 4.21 0.34
10 22 -2 2.89 0.62
-10 22 2 3.14 0.23
10 22 -2 3.49 0.5
-10 22 2 3.32 0.5
-8 -22 2 2.56 0.35
-8 -22 2 3 0.25
8 -22 -2 2.36 0.29
-8 -22 2 2.62 0.26
8 22 -2 1.07 0.57
8 22 -2 0.42 0.41
-8 22 2 0.85 0.19
-8 22 2 1.03 0.38
-8 22 2 1.22 0.25
-6 -22 2 21.3 0.73
-6 -22 2 21.22 0.76
6 -22 -2 21 0.8
-6 -22 2 19.92 0.82
6 22 -2 15.95 0.94
-6 22 2 15.97 0.62
-6 22 2 17.14 0.84
-6 22 2 16.63 0.6
6 22 -2 16.48 0.89
4 -22 -2 16.71 0.67
-4 -22 2 15.57 0.68
-4 -22 2 16.24 0.56
-4 -22 2 16.31 0.64
4 22 -2 17.55 0.96
-4 22 2 17.23 0.62
4 22 -2 15.92 0.82
-4 22 2 18.54 0.87
-4 22 2 16.55 0.65
-2 -22 2 5.58 0.44
2 -22 -2 7.2 0.44
-2 -22 2 6.41 0.39
-2 22 2 3.22 0.44
-2 22 2 2.61 0.34
2 22 -2 2.94 0.41
-2 22 2 3.13 0.25
2 22 -2 2.6 0.47
-2 22 2 3.43 0.29
0 -22 -2 7.18 0.32
0 -22 2 7.94 0.46
0 -22 2 7.61 0.42
0 -22 -2 7.09 0.46
0 22 -2 3.69 0.47
0 22 2 4.11 0.48
0 22 2 3.94 0.33
0 22 2 4.17 0.35
0 22 -2 3.82 0.42
0 22 2 4.18 0.38
-2 -22 -2 11.34 0.41
2 -22 2 10.51 0.54
-2 -22 -2 10.47 0.45
2 -22 2 11.3 0.51
-2 -22 -2 9.88 0.55
-2 22 -2 11.61 0.69
-2 22 -2 11.83 0.7
2 22 2 12.19 0.56
2 22 2 11.93 0.6
2 22 2 12.05 0.61
2 22 2 12.67 0.84
4 -22 2 3.34 0.35
4 -22 2 2.82 0.29
-4 -22 -2 2.31 0.24
-4 -22 -2 2.79 0.2
-4 -22 -2 2.01 0.3
-4 22 -2 3.53 0.42
4 22 2 3.11 0.38
-4 22 -2 4.06 0.44
4 22 2 2.65 0.55
4 22 2 2.77 0.36
-6 -22 -2 5.11 0.39
6 -22 2 4.09 0.32
6 -22 2 4.96 0.37
-6 22 -2 5.11 0.43
6 22 2 4.4 0.41
6 22 2 4.47 0.59
6 22 2 5.75 0.48
-6 22 -2 4.82 0.53
8 -22 2 7.18 0.47
-8 -22 -2 7.03 0.47
8 -22 2 7.11 0.48
-8 -22 -2 6.5 0.39
-8 22 -2 5.29 0.49
-8 22 -2 5.1 0.46
8 22 2 4.65 0.66
8 22 2 4.57 0.45
-10 -22 -2 5.6 0.42
10 -22 2 7.1 0.53
10 -22 2 7.06 0.51
-10 -22 -2 7.69 0.51
10 22 2 4.33 0.68
10 22 2 4.31 0.48
-10 22 -2 4.97 0.44
-10 22 -2 4.85 0.48
12 -22 2 3.93 0.39
-12 -22 -2 3.29 0.31
12 -22 2 2.9 0.36
-12 -22 -2 3.14 0.36
-12 22 -2 2.47 0.39
12 22 2 1.27 0.72
12 22 2 2.29 0.46
-12 22 -2 2.55 0.41
-12 22 -2 2.67 0.32
-14 -22 -2 3.83 0.4
14 -22 2 3.85 0.39
-14 -22 -2 3.42 0.34
-14 22 -2 1.87 0.31
14 22 2 1.96 0.81
14 22 2 2 0.45
-14 22 -2 3 0.45
-14 22 -2 2.27 0.38
-16 -22 -2 2.93 0.41
-16 -22 -2 3.17 0.36
16 22 2 2.51 0.8
-16 22 -2 3.05 0.41
-16 22 -2 2.67 0.47
-16 22 -2 2.82 0.35
16 22 2 3.12 0.49
-18 -22 -2 2.95 0.44
-18 -22 -2 1.79 0.36
-18 22 -2 2.34 0.36
18 22 2 2.89 0.49
18 22 2 2.78 0.92
-18 22 -2 2.27 0.49
-18 22 -2 2.25 0.42
-20 -22 -2 2.12 0.46
-20 -22 -2 1.81 0.39
-20 22 -2 1.04 0.35
-20 22 -2 1.51 0.48
20 22 2 0.83 0.9
22 22 2 6.53 1.12
-22 22 -2 4.82 0.59
-21 -23 2 1.04 0.41
-21 -23 2 0.73 0.43
21 23 -2 1.05 0.55
21 23 -2 0.83 0.77
-21 23 2 0.87 0.6
-19 -23 2 0.54 0.39
-19 -23 2 0.34 0.37
19 23 -2 1.47 0.56
-19 23 2 0.86 0.57
19 23 -2 1.59 0.81
-17 -23 2 2.75 0.39
-17 -23 2 2.35 0.42
17 23 -2 2.59 0.76
17 23 -2 3.46 0.58
-17 23 2 2.5 0.53
-15 -23 2 0.19 0.32
-15 -23 2 -0.43 0.3
15 23 -2 -0.21 0.62
15 23 -2 0.2 0.51
-15 23 2 0.05 0.48
13 -23 -2 7.35 0.49
-13 -23 2 5.84 0.41
-13 -23 2 6.85 0.51
13 23 -2 5.32 0.79
13 23 -2 6.13 0.65
-13 23 2 6.21 0.33
-13 23 2 6.57 0.66
-11 -23 2 9.27 0.47
-11 -23 2 9.18 0.52
11 -23 -2 8.26 0.52
11 23 -2 7.49 0.67
-11 23 2 7.24 0.36
11 23 -2 5.49 0.76
-11 23 2 7.1 0.66
-9 -23 2 4.99 0.34
9 -23 -2 5.74 0.39
-9 -23 2 4.77 0.45
-9 -23 2 4.65 0.38
-9 23 2 3.68 0.26
9 23 -2 3.52 0.62
-9 23 2 3.41 0.48
9 23 -2 3.05 0.5
-7 -23 2 11.06 0.63
-7 -23 2 10.42 0.48
-7 -23 2 11.01 0.51
7 -23 -2 12.01 0.56
7 23 -2 7.84 0.65
-7 23 2 8.49 0.73
-7 23 2 8.2 0.42
7 23 -2 7.52 0.8
-5 -23 2 17.57 0.7
-5 -23 2 17.26 0.62
5 -23 -2 18.43 0.73
-5 -23 2 18.42 0.78
-5 23 2 17.85 0.88
-5 23 2 16.96 0.62
5 23 -2 16.49 0.95
-5 23 2 16.85 0.66
5 23 -2 16.09 0.85
-3 -23 2 8.51 0.44
3 -23 -2 8.05 0.5
-3 -23 2 7.69 0.5
3 23 -2 9.57 0.67
-3 23 2 9.88 0.46
3 23 -2 9.98 0.73
-3 23 2 11.31 0.79
-3 23 2 10.58 0.58
-3 23 2 9.95 0.51
-1 -23 2 11.61 0.53
1 -23 -2 11.62 0.46
1 -23 -2 11.21 0.57
-1 -23 2 12.21 0.61
-1 23 2 8.35 0.59
1 23 -2 8.22 0.64
-1 23 2 8.44 0.44
-1 23 2 8.29 0.75
-1 23 2 8.2 0.49
1 23 -2 7.1 0.61
1 -23 2 3.17 0.29
1 -23 2 3.13 0.33
-1 -23 -2 2.83 0.34
-1 -23 -2 2.75 0.2
1 23 2 4.12 0.39
1 23 2 3.45 0.36
1 23 2 4.76 0.33
-1 23 -2 5.08 0.49
1 23 2 4.01 0.53
-1 23 -2 4.7 0.5
3 -23 2 5.23 0.41
-3 -23 -2 5.36 0.27
-3 -23 -2 4.84 0.34
-3 -23 -2 4.89 0.37
3 -23 2 5.08 0.38
-3 23 -2 6.04 0.52
3 23 2 6.53 0.66
-3 23 -2 6.74 0.61
3 23 2 6.82 0.57
3 23 2 5.62 0.44
-5 -23 -2 3.15 0.28
-5 -23 -2 2.89 0.34
5 -23 2 3.6 0.38
5 -23 2 3.18 0.32
5 23 2 5.02 0.46
-5 23 -2 4.55 0.44
5 23 2 4.51 0.6
-5 23 -2 4.8 0.48
5 23 2 4.22 0.42
7 -23 2 0.11 0.27
7 -23 2 0.07 0.27
-7 -23 -2 -0.09 0.23
-7 23 -2 0.15 0.34
-7 23 -2 0.27 0.37
7 23 2 -0.14 0.37
7 23 2 0.22 0.57
9 -23 2 1.28 0.31
-9 -23 -2 1.62 0.29
-9 -23 -2 1.36 0.23
9 -23 2 1.67 0.35
-9 23 -2 2.32 0.41
-9 23 -2 2.09 0.41
9 23 2 2.62 0.64
9 23 2 2.14 0.44
-11 -23 -2 0.48 0.24
-11 -23 -2 0.84 0.3
11 -23 2 0.7 0.33
11 -23 2 0.52 0.29
11 23 2 1 0.38
-11 23 -2 0.62 0.37
11 23 2 0.55 0.64
-11 23 -2 1.1 0.39
13 -23 2 3.57 0.41
13 -23 2 3.15 0.38
-13 -23 -2 2.79 0.32
-13 -23 -2 4.01 0.39
13 23 2 3.18 0.76
-13 23 -2 2.64 0.44
-13 23 -2 3.88 0.35
-13 23 -2 3.33 0.43
13 23 2 3.31 0.5
-15 -23 -2 8.96 0.63
-15 -23 -2 8.06 0.53
-15 23 -2 7.74 0.7
15 23 2 7.69 0.63
-15 23 -2 8.53 0.63
15 23 2 5.82 1
-15 23 -2 7.54 0.54
-17 -23 -2 2.87 0.38
-17 -23 -2 2.01 0.42
-17 23 -2 2.78 0.49
-17 23 -2 2.14 0.36
-17 23 -2 2.69 0.43
17 23 2 1.92 0.82
17 23 2 2.74 0.51
-19 -23 -2 0.5 0.41
-19 -23 -2 0.18 0.36
-19 23 -2 -0.27 0.31
19 23 2 1.23 0.46
19 23 2 0.57 0.81
-19 23 -2 -0.06 0.45
-19 23 -2 0.31 0.38
-21 23 -2 5.59 0.65
21 23 2 6.15 1.02
-20 -24 2 2.85 0.46
-20 -24 2 2.41 0.44
20 24 -2 4.05 0.6
-20 24 2 2.03 0.58
20 24 -2 2.95 0.84
-18 -24 2 2.67 0.41
-18 -24 2 2.86 0.42
-18 24 2 2.97 0.63
18 24 -2 3.28 0.88
18 24 -2 3.8 0.61
-16 -24 2 5.15 0.44
-16 -24 2 3.96 0.4
-16 -24 2 5.13 0.46
16 24 -2 5.42 0.92
-16 24 2 4.56 0.64
16 24 -2 4.5 0.63
14 -24 -2 2.61 0.35
-14 -24 2 2.08 0.33
-14 -24 2 1.99 0.3
-14 24 2 2.75 0.52
14 24 -2 2.39 0.8
14 24 -2 3.24 0.55
-12 -24 2 15.92 0.7
-12 -24 2 15.98 0.67
12 -24 -2 16.39 0.72
-12 24 2 13.34 0.51
12 24 -2 13.22 0.87
12 24 -2 12.02 1.08
-12 24 2 13.22 0.84
10 -24 -2 9.76 0.55
-10 -24 2 10.63 0.61
-10 -24 2 9.9 0.51
-10 -24 2 9.8 0.51
-10 24 2 8.58 0.42
10 24 -2 9.26 0.85
10 24 -2 8.2 0.88
-10 24 2 9.12 0.73
8 -24 -2 10.86 0.57
-8 -24 2 10.2 0.59
-8 -24 2 10.61 0.49
-8 -24 2 10.47 0.52
8 24 -2 7.25 0.62
-8 24 2 7.5 0.41
-8 24 2 8.12 0.68
8 24 -2 7.75 0.81
-6 -24 2 20.81 0.86
-6 -24 2 21.42 0.75
-6 -24 2 22.47 0.81
6 -24 -2 21.54 0.84
-6 24 2 18.58 0.93
-6 24 2 17.54 0.69
6 24 -2 17.65 1.11
6 24 -2 17.87 0.92
4 -24 -2 10.65 0.55
-4 -24 2 9.37 0.56
-4 -24 2 9.79 0.49
-4 24 2 9.63 0.52
4 24 -2 10.26 0.72
-4 24 2 10.81 0.61
-4 24 2 10.95 0.75
-4 24 2 10.36 0.47
4 24 -2 10.49 0.87
-2 -24 2 18.41 0.71
2 -24 -2 17.82 0.76
-2 -24 2 18.07 0.79
-2 24 2 17.38 0.68
-2 24 2 18.28 0.93
-2 24 2 17.71 0.73
2 24 -2 18.59 0.93
-2 24 2 17.77 0.79
2 24 -2 16.38 0.86
0 -24 2 17.13 0.71
0 -24 2 15.96 0.64
0 -24 -2 16.02 0.69
0 24 -2 13.78 0.79
0 24 2 15.18 0.87
0 24 2 14.03 0.62
0 24 2 14.59 0.67
0 24 -2 14.34 0.82
0 24 2 13.71 0.7
2 -24 2 0.98 0.3
-2 -24 -2 1.19 0.18
2 -24 2 1.48 0.28
-2 -24 -2 0.81 0.32
2 24 2 0.81 0.33
-2 24 -2 0.84 0.42
-2 24 -2 1.42 0.42
2 24 2 0.97 0.34
2 24 2 0.97 0.47
-4 -24 -2 4.69 0.36
-4 -24 -2 5.19 0.43
4 -24 2 5.33 0.43
4 -24 2 5.48 0.38
4 24 2 4.4 0.45
4 24 2 4.35 0.61
-4 24 -2 4.84 0.47
-4 24 -2 5.72 0.52
4 24 2 4.76 0.45
-6 -24 -2 0.29 0.33
6 -24 2 0.37 0.28
-6 -24 -2 0.42 0.23
6 -24 2 0.34 0.32
6 24 2 -0.29 0.49
6 24 2 -0.3 0.33
-6 24 -2 -0.18 0.36
-6 24 -2 -0.23 0.38
8 -24 2 0.23 0.29
-8 -24 -2 0.21 0.25
8 -24 2 0.2 0.3
8 24 2 0.13 0.36
8 24 2 0.54 0.64
-8 24 -2 0.59 0.4
-8 24 -2 0.64 0.37
10 -24 2 1.6 0.31
10 -24 2 1.58 0.34
-10 -24 -2 1.9 0.32
-10 -24 -2 1.72 0.26
10 24 2 1.91 0.46
10 24 2 1.89 0.74
-10 24 -2 2.36 0.43
-10 24 -2 2.22 0.39
12 -24 2 3.71 0.42
-12 -24 -2 3.87 0.33
12 -24 2 3.99 0.4
-12 -24 -2 3.87 0.39
12 24 2 4.63 0.55
12 24 2 4.69 0.8
-12 24 -2 4.3 0.5
-12 24 -2 4.67 0.39
-12 24 -2 4.79 0.48
-14 -24 -2 7.7 0.53
-14 -24 -2 7.96 0.61
14 -24 2 7.02 0.56
-14 24 -2 6.56 0.51
14 24 2 6.95 0.94
14 24 2 7.05 0.63
-14 24 -2 7.84 0.64
-14 24 -2 7.63 0.66
-16 -24 -2 2.68 0.42
-16 -24 -2 2.2 0.36
-16 24 -2 2.85 0.49
-16 24 -2 2.9 0.44
-16 24 -2 2.11 0.36
16 24 2 1.82 0.91
16 24 2 3.14 0.53
-18 -24 -2 1.01 0.42
-18 -24 -2 0.59 0.35
18 24 2 0.99 0.92
-18 24 -2 1.61 0.42
-18 24 -2 0.69 0.47
18 24 2 1.77 0.49
-18 24 -2 0.65 0.34
20 24 2 2.59 1
-20 24 -2 2.56 0.55
-19 -25 2 11.87 0.75
-19 -25 2 10.15 0.74
19 25 -2 10.21 0.93
19 25 -2 8.87 1.09
-19 25 2 8.59 0.87
-17 -25 2 4.85 0.45
-17 -25 2 5.88 0.49
17 25 -2 4.3 0.84
17 25 -2 5.39 0.66
-17 25 2 4.32 0.62
-15 -25 2 6.09 0.45
15 -25 -2 6.37 0.47
15 25 -2 5.4 0.68
-15 25 2 4.43 0.61
15 25 -2 4.34 0.82
13 -25 -2 7.95 0.56
-13 -25 2 8.24 0.64
-13 -25 2 7.73 0.49
-13 -25 2 8.74 0.55
-13 25 2 8.24 0.76
13 25 -2 7.6 0.68
13 25 -2 7.3 0.89
-11 -25 2 6.5 0.53
-11 -25 2 7.75 0.49
11 -25 -2 8.01 0.54
-11 -25 2 7.4 0.47
11 25 -2 6.8 0.89
-11 25 2 6.8 0.39
11 25 -2 7.22 0.66
-11 25 2 7.59 0.73
-9 -25 2 4.3 0.47
9 -25 -2 4 0.38
-9 -25 2 4.63 0.33
-9 -25 2 4.17 0.31
-9 25 2 2.8 0.5
9 25 -2 2.75 0.65
-9 25 2 2.48 0.25
9 25 -2 2.46 0.53
-7 -25 2 24.23 0.9
-7 -25 2 25.11 1.01
-7 -25 2 23.98 0.85
7 -25 -2 24.71 0.94
-7 25 2 18.61 0.95
7 25 -2 17.56 0.94
-7 25 2 16.77 0.68
7 25 -2 17.05 1.17
-5 -25 2 24.42 0.96
-5 -25 2 23.93 0.9
5 -25 -2 24.9 0.93
5 25 -2 20.68 1.1
5 25 -2 19.59 0.99
-5 25 2 22.25 1.04
-5 25 2 20.05 0.88
-5 25 2 20.77 0.79
-3 -25 2 12.68 0.59
3 -25 -2 13.37 0.65
-3 -25 2 12.66 0.65
-3 25 2 11.95 0.66
3 25 -2 11.17 0.75
-3 25 2 9.91 0.58
-3 25 2 11.92 0.8
-3 25 2 11.7 0.52
3 25 -2 11.84 0.9
-1 -25 2 10.03 0.58
1 -25 -2 10.61 0.59
-1 -25 2 10.43 0.52
-1 25 2 9.43 0.57
1 25 -2 10.62 0.81
-1 25 2 9.32 0.61
1 25 -2 9.95 0.78
-1 25 2 9.77 0.78
-1 25 2 9.19 0.52
1 -25 2 10.85 0.54
-1 -25 -2 9.44 0.55
1 -25 2 10.52 0.62
1 25 2 7.62 0.57
-1 25 -2 8.04 0.61
-1 25 -2 8.13 0.73
1 25 2 7.89 0.58
1 25 2 7.43 0.71
-3 -25 -2 5.58 0.35
-3 -25 -2 4.97 0.41
3 -25 2 6.38 0.47
3 -25 2 6.05 0.46
-3 25 -2 4.76 0.52
3 25 2 5.16 0.47
3 25 2 5.29 0.5
3 25 2 4.24 0.65
-3 25 -2 5.47 0.54
-5 -25 -2 8.9 0.6
5 -25 2 9.2 0.6
-5 -25 -2 8.38 0.46
5 -25 2 8.48 0.49
5 25 2 6.22 0.74
5 25 2 5.53 0.52
-5 25 -2 5.31 0.5
-5 25 -2 6.11 0.64
7 -25 2 1.14 0.36
-7 -25 -2 0.73 0.25
7 -25 2 1.02 0.28
-7 -25 -2 0.83 0.34
7 25 2 1.22 0.66
-7 25 -2 0.94 0.41
7 25 2 0.26 0.42
-7 25 -2 0.97 0.38
9 -25 2 1.26 0.34
9 -25 2 1.17 0.37
-9 -25 -2 0.41 0.29
9 25 2 0 0.39
9 25 2 -0.75 0.67
-9 25 -2 -0.15 0.41
-9 25 -2 0.36 0.38
11 -25 2 0.53 0.37
11 -25 2 0.61 0.32
-11 -25 -2 0.79 0.26
-11 -25 -2 1 0.31
11 25 2 0.11 0.41
11 25 2 1.17 0.7
-11 25 -2 0.02 0.4
-11 25 -2 0.72 0.42
-13 -25 -2 1.14 0.35
13 -25 2 0.8 0.35
-13 -25 -2 1.02 0.28
13 -25 2 1.46 0.36
-13 25 -2 0.63 0.44
-13 25 -2 0.43 0.42
13 25 2 0.83 0.5
-13 25 -2 0.86 0.3
13 25 2 0.58 0.73
-15 -25 -2 0.89 0.32
-15 -25 -2 1.34 0.38
15 -25 2 0.52 0.37
-15 25 -2 1.04 0.45
-15 25 -2 0.97 0.33
15 25 2 1.22 0.52
15 25 2 1.14 0.81
-15 25 -2 1.47 0.44
-17 -25 -2 0.82 0.39
-17 -25 -2 0.84 0.34
-17 25 -2 0.27 0.43
-17 25 -2 0.29 0.47
17 25 2 1.05 0.82
17 25 2 0.82 0.5
19 25 2 0.13 0.83
-19 25 -2 0.28 0.49
-18 -26 2 8.48 0.68
-18 26 2 6.07 0.7
18 26 -2 7.36 1.06
18 26 -2 6.9 0.68
-16 -26 2 2.57 0.38
16 26 -2 3.34 0.59
-16 26 2 3.03 0.59
16 26 -2 3.36 0.81
14 -26 -2 4.11 0.42
-14 -26 2 3.01 0.53
-14 -26 2 3.64 0.37
-14 26 2 3.68 0.63
14 26 -2 2.81 0.77
14 26 -2 4.37 0.67
12 -26 -2 11.28 0.63
-12 -26 2 11.58 0.54
-12 -26 2 10.97 0.7
-12 -26 2 10.61 0.59
12 26 -2 10.2 1.09
-12 26 2 12.21 0.95
12 26 -2 11.5 0.88
-10 -26 2 0.49 0.37
-10 -26 2 0.75 0.26
10 -26 -2 0.91 0.32
-10 -26 2 0.39 0.25
-10 26 2 0.51 0.45
10 26 -2 0.21 0.7
-10 26 2 0.19 0.22
10 26 -2 -0.54 0.54
-8 -26 2 4.73 0.35
8 -26 -2 4.78 0.4
-8 -26 2 4.77 0.48
-8 -26 2 4.37 0.3
8 26 -2 1.78 0.63
-8 26 2 2.4 0.5
-8 26 2 2.28 0.27
8 26 -2 1.96 0.58
6 -26 -2 12.3 0.64
-6 -26 2 13.12 0.68
-6 -26 2 13 0.6
6 26 -2 8.57 0.72
-6 26 2 8.98 0.7
-6 26 2 8.72 0.76
-6 26 2 8.51 0.5
6 26 -2 9.62 0.89
-4 -26 2 17.8 0.71
4 -26 -2 17.92 0.77
-4 -26 2 16.94 0.78
-4 26 2 13.06 0.72
-4 26 2 13.21 0.62
4 26 -2 12.56 0.92
4 26 -2 11.98 0.82
-4 26 2 12.79 0.86
-2 -26 2 13.94 0.68
2 -26 -2 14.31 0.65
-2 -26 2 13.91 0.63
-2 26 2 10.24 0.66
2 26 -2 9.93 0.82
-2 26 2 9.79 0.59
2 26 -2 10.89 0.81
-2 26 2 10.38 0.81
-2 26 2 10.69 0.54
0 -26 2 4 0.35
0 -26 2 4.01 0.44
0 -26 -2 4.68 0.41
0 26 2 3.48 0.39
0 26 -2 4.08 0.54
0 26 2 4.14 0.48
0 26 -2 4.04 0.57
0 26 2 3.61 0.57
-2 -26 -2 7.68 0.58
2 -26 2 7.86 0.51
2 -26 2 8.61 0.55
2 26 2 7.63 0.67
2 26 2 6.77 0.69
-2 26 -2 7.19 0.74
2 26 2 7.26 0.59
-2 26 -2 7.35 0.62
-4 -26 -2 5.33 0.36
4 -26 2 6.25 0.48
-4 -26 -2 4.13 0.41
4 -26 2 6 0.47
-4 26 -2 4.93 0.55
-4 26 -2 5.03 0.51
4 26 2 4.93 0.51
4 26 2 4.04 0.66
6 -26 2 8.38 0.6
-6 -26 -2 5.73 0.47
6 -26 2 6.8 0.52
-6 -26 -2 6.4 0.44
-6 26 -2 6.17 0.6
6 26 2 5.39 0.73
6 26 2 5.96 0.56
-6 26 -2 5.11 0.52
8 -26 2 3.82 0.37
-8 -26 -2 4.03 0.34
8 -26 2 4.4 0.42
-8 -26 -2 3.64 0.43
8 26 2 3.73 0.78
8 26 2 3.29 0.52
-8 26 -2 3.07 0.49
-8 26 -2 3.03 0.48
-10 -26 -2 2.51 0.34
10 -26 2 3.01 0.4
10 -26 2 2.85 0.4
10 26 2 1.98 0.73
10 26 2 1.66 0.49
-10 26 -2 1.66 0.42
-10 26 -2 1.56 0.41
12 -26 2 3.87 0.46
12 -26 2 3.81 0.46
-12 -26 -2 3.67 0.39
-12 26 -2 1.71 0.42
12 26 2 2.31 0.87
-12 26 -2 2.55 0.34
-12 26 -2 2.31 0.48
12 26 2 2.42 0.49
14 -26 2 3.3 0.47
-14 -26 -2 2.16 0.44
-14 -26 -2 2.92 0.4
-14 26 -2 1.58 0.47
-14 26 -2 2.12 0.5
-14 26 -2 0.96 0.47
14 26 2 0.72 0.52
14 26 2 0.97 0.81
-16 -26 -2 -0.03 0.37
-16 -26 -2 -0.49 0.35
16 26 2 0.42 0.52
-16 26 -2 -0.13 0.46
-16 26 -2 0.11 0.44
16 26 2 0.27 0.81
17 27 -2 4.74 0.95
-17 27 2 4.2 0.7
15 -27 -2 0.92 0.36
-15 -27 2 0.42 0.32
-15 -27 2 0.91 0.45
-15 27 2 1.92 0.61
15 27 -2 1.96 0.76
15 27 -2 1.71 0.57
-13 -27 2 1.55 0.49
-13 -27 2 1.37 0.32
13 -27 -2 1.76 0.37
13 27 -2 0.88 0.59
13 27 -2 1.69 0.73
-13 27 2 0.78 0.51
-11 -27 2 2.07 0.3
-11 -27 2 1.58 0.29
-11 -27 2 2.33 0.43
11 -27 -2 2.34 0.38
11 27 -2 1.41 0.62
-11 27 2 2 0.53
11 27 -2 1.26 0.69
-9 -27 2 1.7 0.44
-9 -27 2 1.56 0.28
9 -27 -2 1.95 0.37
-9 27 2 0.76 0.47
-9 27 2 0.89 0.25
9 27 -2 0.65 0.71
9 27 -2 0.44 0.58
-7 -27 2 2.01 0.29
-7 -27 2 2.09 0.4
7 -27 -2 2.58 0.38
-7 27 2 1.44 0.4
-7 27 2 1.35 0.28
7 27 -2 1.08 0.58
-7 27 2 1.29 0.49
7 27 -2 1.03 0.61
5 -27 -2 4.02 0.4
-5 -27 2 4.04 0.33
-5 -27 2 4.37 0.45
-5 27 2 1.4 0.5
5 27 -2 1.35 0.64
5 27 -2 1.73 0.51
-5 27 2 2.09 0.32
-5 27 2 1.67 0.41
-3 -27 2 7.73 0.63
-3 -27 2 8.58 0.5
3 -27 -2 7.8 0.52
3 27 -2 7.1 0.75
3 27 -2 6.62 0.66
-3 27 2 6.31 0.53
-3 27 2 7.02 0.76
-3 27 2 6.34 0.53
1 -27 -2 11.69 0.65
-1 -27 2 12.23 0.58
-1 -27 2 10.98 0.7
-1 27 2 7.17 0.61
1 27 -2 9.43 0.87
1 27 -2 9.71 0.74
-1 27 2 8.89 0.82
-1 27 2 8.63 0.65
-1 -27 -2 3.32 0.41
1 -27 2 2.88 0.34
1 -27 2 3.63 0.44
1 27 2 2.39 0.58
-1 27 -2 2.59 0.54
1 27 2 2.88 0.48
-1 27 -2 2.64 0.53
3 -27 2 3.83 0.36
-3 -27 -2 3.02 0.39
3 -27 2 3.38 0.4
-3 27 -2 4 0.52
-3 27 -2 4.68 0.52
3 27 2 3.88 0.65
3 27 2 4.16 0.52
-5 -27 -2 3.26 0.27
5 -27 2 3.96 0.44
-5 -27 -2 3.22 0.4
5 -27 2 3.61 0.38
5 27 2 3.37 0.67
5 27 2 2.91 0.46
-5 27 -2 3.58 0.53
-5 27 -2 3.45 0.53
-7 -27 -2 3.73 0.47
7 -27 2 4.99 0.44
7 -27 2 4.81 0.42
-7 -27 -2 3.55 0.32
7 27 2 2.5 0.7
-7 27 -2 3.41 0.51
-7 27 -2 3.4 0.49
7 27 2 2.64 0.52
-9 -27 -2 2.15 0.42
-9 -27 -2 1.89 0.31
9 -27 2 2.6 0.39
9 -27 2 2.57 0.4
9 27 2 1.21 0.51
9 27 2 1.84 0.72
-9 27 -2 1.15 0.47
-9 27 -2 1.66 0.49
11 -27 2 4.35 0.44
11 -27 2 6.58 0.53
-11 -27 -2 5.45 0.43
11 27 2 4.03 0.6
-11 27 -2 4.06 0.53
11 27 2 2.77 0.81
-11 27 -2 4.43 0.55
-13 -27 -2 4.69 0.44
13 -27 2 6.27 0.5
-13 27 -2 3.05 0.53
-13 27 -2 3.47 0.48
13 27 2 2.66 0.85
13 27 2 3.27 0.55
15 -27 2 2.2 0.48
-15 -27 -2 3.42 0.44
15 27 2 2.48 0.89
15 27 2 2.75 0.6
-15 27 -2 2.13 0.54
-15 27 -2 1.5 0.49
-14 -28 2 0.99 0.46
-14 -28 2 1.33 0.34
14 -28 -2 1.51 0.37
-14 28 2 1.76 0.57
14 28 -2 2.68 0.67
14 28 -2 2.13 0.78
12 -28 -2 0.52 0.36
-12 -28 2 0.17 0.3
-12 -28 2 1.12 0.47
-12 28 2 0.3 0.55
12 28 -2 0.33 0.71
12 28 -2 0.07 0.54
-10 -28 2 1.65 0.42
10 -28 -2 1.27 0.36
-10 28 2 2.23 0.54
10 28 -2 0.22 0.55
10 28 -2 1.43 0.7
-10 28 2 2.45 0.5
8 -28 -2 0.82 0.31
-8 -28 2 0.4 0.43
-8 -28 2 0.59 0.28
-8 28 2 1.13 0.57
8 28 -2 1.35 0.72
-8 28 2 0.72 0.41
-8 28 2 1.02 0.28
8 28 -2 1.18 0.61
-6 -28 2 0.75 0.38
6 -28 -2 1.06 0.36
-6 -28 2 1.02 0.29
-6 28 2 1.47 0.47
6 28 -2 1.13 0.69
-6 28 2 1.4 0.32
6 28 -2 1.35 0.6
-6 28 2 2.26 0.61
4 -28 -2 0.93 0.31
-4 -28 2 0.08 0.4
-4 -28 2 0.77 0.28
-4 28 2 0.79 0.4
4 28 -2 0.45 0.61
-4 28 2 0.48 0.5
-4 28 2 0.72 0.32
4 28 -2 0.48 0.5
2 -28 -2 3.59 0.42
-2 -28 2 4.02 0.36
-2 -28 2 2.76 0.42
2 28 -2 4.03 0.67
2 28 -2 4.73 0.58
-2 28 2 4.67 0.68
-2 28 2 4.46 0.49
0 -28 2 5.69 0.52
0 -28 2 6.38 0.5
0 -28 -2 6.31 0.49
0 28 -2 5.14 0.58
0 28 2 5.6 0.74
0 28 2 5.81 0.53
0 28 -2 5.79 0.68
2 -28 2 1.25 0.36
-2 -28 -2 1.41 0.39
2 -28 2 0.98 0.3
2 28 2 1.5 0.59
-2 28 -2 1.34 0.53
-2 28 -2 2.09 0.5
2 28 2 2.24 0.49
4 -28 2 0.1 0.31
4 -28 2 0.47 0.36
-4 -28 -2 0.61 0.38
4 28 2 -0.17 0.58
-4 28 -2 -0.29 0.47
4 28 2 -0.18 0.45
-4 28 -2 -0.02 0.49
-6 -28 -2 5.04 0.51
6 -28 2 4.27 0.42
6 -28 2 5.85 0.51
6 28 2 4.25 0.81
-6 28 -2 4.22 0.57
-6 28 -2 4.18 0.57
6 28 2 4.33 0.53
-8 -28 -2 0.25 0.26
-8 -28 -2 0.09 0.42
8 -28 2 0.22 0.35
8 -28 2 0.12 0.36
-8 28 -2 0.3 0.46
8 28 2 0.21 0.51
8 28 2 0.43 0.68
-8 28 -2 0.74 0.44
10 -28 2 4.22 0.5
10 -28 2 4.5 0.47
-10 -28 -2 2.8 0.5
-10 -28 -2 3.75 0.37
10 28 2 3.79 0.6
10 28 2 2.38 0.81
-10 28 -2 3.26 0.5
-10 28 -2 2.49 0.53
12 -28 2 4.14 0.48
-12 -28 -2 4.18 0.41
12 28 2 2.26 0.84
-12 28 -2 2.14 0.52
-12 28 -2 3.36 0.56
12 28 2 3.45 0.61
14 -28 2 14.11 0.79
-14 -28 -2 16.13 0.81
-14 28 -2 11.68 0.89
-14 28 -2 11.18 0.77
14 28 2 11.51 0.95
14 28 2 9.57 1.13
13 -29 -2 1.94 0.41
-13 -29 2 1.29 0.51
13 29 -2 2.42 0.86
-13 29 2 1.81 0.48
-13 29 2 1.41 0.57
13 29 -2 2 0.6
-11 -29 2 -0.01 0.42
11 -29 -2 0.49 0.35
11 29 -2 -0.16 0.56
-11 29 2 -0.13 0.51
11 29 -2 0.45 0.8
-11 29 2 0.42 0.49
-9 -29 2 1.39 0.43
9 -29 -2 2.05 0.4
9 29 -2 2.97 0.83
9 29 -2 3.24 0.63
-9 29 2 3.1 0.64
-9 29 2 3.39 0.54
7 -29 -2 2.42 0.36
-7 -29 2 1.79 0.32
-7 -29 2 2.5 0.48
-7 29 2 3.06 0.53
-7 29 2 2.48 0.59
7 29 -2 2.64 0.77
7 29 -2 3.24 0.67
5 -29 -2 2.27 0.39
-5 -29 2 1.46 0.31
-5 -29 2 2.24 0.46
-5 29 2 2.83 0.51
5 29 -2 1.81 0.57
5 29 -2 2.2 0.65
-5 29 2 2.53 0.58
3 -29 -2 0.1 0.37
-3 -29 2 0.59 0.29
-3 -29 2 -0.55 0.4
3 29 -2 -0.54 0.49
-3 29 2 0.16 0.41
-3 29 2 0.15 0.58
3 29 -2 0.15 0.62
-1 -29 2 2.58 0.35
1 -29 -2 2.34 0.41
-1 -29 2 1.76 0.41
-1 29 2 3.29 0.53
1 29 -2 2.72 0.64
-1 29 2 3.33 0.63
1 29 -2 2.11 0.54
1 -29 2 2.62 0.36
1 -29 2 1.57 0.4
-1 -29 -2 2.03 0.41
1 29 2 3.31 0.49
-1 29 -2 2.29 0.59
1 29 2 2.32 0.63
-1 29 -2 2.52 0.59
-3 -29 -2 0.56 0.35
3 -29 2 0.46 0.33
3 -29 2 0.7 0.37
3 29 2 0.04 0.48
3 29 2 0.02 0.6
-3 29 -2 -0.17 0.51
-3 29 -2 -0.44 0.45
5 -29 2 2.43 0.41
5 -29 2 1.81 0.38
-5 -29 -2 1.92 0.45
-5 29 -2 1.29 0.53
5 29 2 1.67 0.68
-5 29 -2 1.84 0.54
5 29 2 1.69 0.54
7 -29 2 0.33 0.36
-7 -29 -2 0.81 0.44
7 -29 2 0.95 0.38
-7 29 -2 0.76 0.5
7 29 2 0.63 0.78
7 29 2 0.49 0.47
-7 29 -2 0.42 0.51
9 -29 2 3.19 0.44
9 -29 2 2.75 0.48
-9 -29 -2 2.38 0.34
-9 -29 -2 2.2 0.47
9 29 2 2.33 0.9
9 29 2 1.86 0.58
-9 29 -2 1.97 0.54
-9 29 -2 1.91 0.56
11 -29 2 2.36 0.4
11 -29 2 1.45 0.44
-11 -29 -2 1.03 0.49
-11 -29 -2 1.69 0.34
11 29 2 0.78 0.58
11 29 2 1.22 0.91
-11 29 -2 1.17 0.54
-11 29 -2 0.89 0.51
13 -29 2 16.92 0.85
13 29 2 11.68 1.26
-13 29 -2 12.62 0.93
-13 29 -2 12.22 0.91
-12 -30 2 2.58 0.54
12 -30 -2 2.16 0.43
10 -30 -2 0.82 0.39
-10 -30 2 0.42 0.43
-10 30 2 -0.25 0.6
-10 30 2 0.51 0.45
10 30 -2 0.8 0.71
10 30 -2 0.12 0.58
8 -30 -2 1.67 0.41
-8 -30 2 1.8 0.45
-8 30 2 1.3 0.58
8 30 -2 1.77 0.72
-8 30 2 1.15 0.47
8 30 -2 1.95 0.67
-6 -30 2 1.19 0.46
6 -30 -2 1.03 0.4
-6 30 2 -0.18 0.59
6 30 -2 0.52 0.65
6 30 -2 0.6 0.56
-6 30 2 0.71 0.44
-4 -30 2 1.54 0.46
-4 -30 2 0.84 0.3
4 -30 -2 0.91 0.4
-4 30 2 -0.11 0.42
4 30 -2 -0.37 0.53
-4 30 2 -0.33 0.59
4 30 -2 -0.44 0.64
2 -30 -2 2.13 0.43
-2 -30 2 1.97 0.47
-2 -30 2 1.68 0.34
-2 30 2 0.32 0.49
2 30 -2 0.38 0.63
-2 30 2 1.14 0.59
2 30 -2 0.38 0.53
0 -30 2 -0.24 0.31
0 -30 -2 -0.08 0.35
0 -30 2 0.45 0.39
0 30 2 -0.03 0.49
0 30 2 -0.83 0.62
0 30 -2 -0.29 0.49
0 30 -2 0.09 0.58
2 -30 2 0.49 0.34
-2 -30 -2 1.04 0.37
2 -30 2 0.36 0.39
2 30 2 0.01 0.68
2 30 2 0.32 0.5
-2 30 -2 0.28 0.56
-2 30 -2 -0.13 0.49
4 -30 2 0.95 0.44
-4 -30 -2 0.96 0.43
4 -30 2 0.68 0.34
-4 30 -2 0.55 0.5
-4 30 -2 1.1 0.56
4 30 2 1.3 0.54
4 30 2 0.63 0.65
6 -30 2 1.83 0.39
-6 -30 -2 1.74 0.42
6 -30 2 1.68 0.45
6 30 2 1.11 0.71
6 30 2 2.04 0.56
-6 30 -2 1.56 0.56
-6 30 -2 1.2 0.55
8 -30 2 1.95 0.42
8 -30 2 2.11 0.43
-8 -30 -2 1.34 0.47
8 30 2 1.18 0.77
-8 30 -2 1.29 0.55
8 30 2 1.66 0.57
-8 30 -2 1.74 0.51
10 -30 2 0.57 0.4
-10 -30 -2 -0.21 0.42
10 -30 2 0.44 0.36
-10 30 -2 -0.54 0.5
-10 30 -2 0.12 0.47
10 30 2 -0.38 0.58
10 30 2 -0.52 0.78
-9 -31 2 0.94 0.45
9 -31 -2 0.23 0.39
9 31 -2 -0.04 0.78
-9 31 2 -0.09 0.47
-9 31 2 0.24 0.57
7 -31 -2 1.39 0.4
-7 -31 2 1.59 0.46
7 31 -2 0.44 0.59
7 31 -2 1.54 0.8
-7 31 2 0.83 0.57
-7 31 2 1.08 0.53
5 -31 -2 3.96 0.45
-5 -31 2 3.94 0.54
5 31 -2 2 0.68
-5 31 2 1.38 0.52
5 31 -2 1.12 0.74
-5 31 2 1.77 0.61
3 -31 -2 2.47 0.45
-3 -31 2 2.35 0.36
-3 -31 2 2.47 0.51
-3 31 2 0.41 0.52
3 31 -2 1.03 0.7
3 31 -2 0.54 0.63
-3 31 2 0.98 0.6
-1 -31 2 3.32 0.52
-1 -31 2 2.74 0.37
1 -31 -2 3.04 0.45
-1 31 2 0.73 0.69
1 31 -2 0.92 0.55
1 31 -2 1.5 0.66
-1 31 2 1.14 0.48
1 -31 2 0.4 0.4
-1 -31 -2 0.36 0.42
1 -31 2 0.28 0.33
-1 31 -2 0.11 0.58
1 31 2 0.53 0.63
1 31 2 -0.3 0.45
-1 31 -2 0.15 0.53
3 -31 2 0.39 0.44
-3 -31 -2 0.27 0.38
3 -31 2 0.32 0.35
-3 31 -2 0.18 0.58
3 31 2 0.23 0.54
3 31 2 0.05 0.73
-3 31 -2 -0.29 0.58
-5 -31 -2 0.74 0.45
5 -31 2 1.09 0.46
5 -31 2 0.67 0.38
-5 31 -2 1.12 0.58
5 31 2 1.43 0.81
-5 31 -2 0.14 0.51
5 31 2 0.91 0.5
-7 -31 -2 2.22 0.5
7 -31 2 3.77 0.53
7 -31 2 3.03 0.45
7 31 2 1.97 0.6
-7 31 -2 2.87 0.61
7 31 2 1.64 0.79
-7 31 -2 2.86 0.61
-4 -32 2 1.91 0.52
4 -32 -2 2.5 0.44
-4 32 2 0.31 0.48
4 32 -2 1.26 0.67
4 32 -2 0.67 0.67
-4 32 2 0.75 0.69
-2 -32 2 3.9 0.56
2 -32 -2 2.51 0.48
2 32 -2 1.58 0.71
-2 32 2 2.09 0.74
-2 32 2 2.06 0.52
2 32 -2 1.09 0.59
0 -32 2 2.48 0.38
0 -32 2 2.83 0.52
0 -32 -2 3.04 0.5
0 32 -2 1.54 0.7
0 32 2 1.74 0.51
0 32 2 1.95 0.69
0 32 -2 1.95 0.65
-2 -32 -2 0.97 0.46
2 -32 2 0.11 0.41
2 -32 2 0.59 0.36
-2 32 -2 1.08 0.64
-2 32 -2 0.9 0.62
2 32 2 0.03 0.66
2 32 2 1.24 0.51
-4 -32 -2 0.62 0.46
4 -32 2 -0.29 0.46
4 32 2 -0.18 0.55
4 32 2 -0.58 0.77
-4 32 -2 -0.22 0.6
-4 32 -2 -0.65 0.57
-30 0 3 2.32 0.42
-30 0 3 2.59 0.4
-28 0 3 8.02 0.6
-28 0 3 7.5 0.63
-26 0 3 15.88 0.74
-26 0 3 14.93 0.75
-24 0 3 16.16 0.7
-24 0 3 15.1 0.73
-22 0 3 0.13 0.25
-22 0 3 -0.68 0.23
-20 0 3 7.05 0.4
20 0 -3 7.86 0.52
-20 0 3 7.84 0.47
-18 0 3 8.69 0.45
-18 0 3 8.35 0.42
18 0 -3 8.66 0.47
-16 0 3 0.29 0.17
16 0 -3 0.42 0.23
-16 0 3 0.35 0.16
-14 0 3 7.6 0.34
-14 0 3 7.67 0.36
14 0 -3 7.69 0.4
-12 0 3 11.23 0.42
12 0 -3 11.13 0.47
-12 0 3 11.04 0.43
-10 0 3 77.48 2.4
10 0 -3 77.59 2.44
-10 0 3 77.9 2.4
-8 0 3 69.56 2.12
-8 0 3 67.89 2.11
8 0 -3 70.49 2.1
8 0 -3 65.46 2.15
-6 0 3 21.23 0.67
6 0 -3 20.54 0.66
6 0 -3 20.78 0.71
4 0 -3 183.13 5.5
4 0 -3 177.35 5.51
-4 0 3 177.86 5.54
-4 0 3 187.82 5.48
-4 0 3 177.49 5.5
4 0 -3 174.5 5.49
2 0 -3 63.25 1.96
-2 0 3 60.9 1.96
2 0 -3 65.28 1.94
-2 0 3 62.19 1.93
-2 0 3 63.96 1.94
0 0 -3 80.52 2.57
0 0 3 82.47 2.58
0 0 3 87.98 2.57
0 0 -3 88.37 2.57
0 0 -3 83.02 2.58
0 0 3 83.07 2.58
0 0 3 82.14 2.61
2 0 3 92.92 2.95
2 0 3 94.26 2.94
-2 0 -3 97.03 2.95
2 0 3 101.71 2.96
-2 0 -3 97.59 2.96
-2 0 -3 93.63 2.93
-2 0 -3 97.76 2.96
2 0 3 95.68 2.95
2 0 3 95.94 2.94
4 0 3 269.54 8.28
-4 0 -3 278.13 8.24
4 0 3 261.36 8.3
-4 0 -3 293.94 8.41
4 0 3 269.73 8.25
-4 0 -3 277.51 8.31
4 0 3 257.98 8.29
4 0 3 250.92 8.37
-6 0 -3 33.96 1.01
6 0 3 30.36 1
6 0 3 29.12 1.09
6 0 3 30.71 1
-6 0 -3 33.26 1.06
6 0 3 32.34 0.98
-6 0 -3 32.35 0.98
-6 0 -3 30.41 1.02
-8 0 -3 143.04 4.31
8 0 3 136.97 4.24
-8 0 -3 138.83 4.21
-8 0 -3 136.01 4.23
8 0 3 137.48 4.23
8 0 3 139.15 4.34
-8 0 -3 135.34 4.24
10 0 3 18.18 0.77
-10 0 -3 16.82 0.57
10 0 3 15.88 0.58
-10 0 -3 15.56 0.59
-14 0 -3 0.4 0.16
-14 0 -3 0.31 0.19
-16 0 -3 3.35 0.28
-16 0 -3 3.31 0.25
-18 0 -3 3.29 0.27
-18 0 -3 3.1 0.3
-20 0 -3 0.86 0.27
-20 0 -3 0.61 0.24
-22 0 -3 0 0.26
-22 0 -3 -0.19 0.32
-24 0 -3 -0.09 0.35
-24 0 -3 -0.02 0.29
-26 0 -3 0.24 0.32
-26 0 -3 0.17 0.36
-28 0 -3 0.87 0.37
-28 0 -3 0.27 0.4
-29 -1 3 4.19 0.44
-29 -1 3 3.42 0.43
-29 1 3 3.14 0.4
-29 1 3 2.95 0.41
-27 -1 3 20.64 0.87
-27 -1 3 18.67 0.88
-27 1 3 17.87 0.79
-27 1 3 17.06 0.82
-25 -1 3 12.35 0.66
-25 -1 3 13.34 0.66
-25 1 3 13.5 0.65
-25 1 3 12.92 0.66
-23 -1 3 1.48 0.31
-23 -1 3 2.31 0.31
-23 1 3 0.99 0.27
-23 1 3 0.84 0.28
-21 -1 3 4.9 0.36
-21 -1 3 5.19 0.41
-21 1 3 8.46 0.47
-21 1 3 8.85 0.5
21 1 -3 7.37 0.56
-19 -1 3 2.25 0.27
-19 -1 3 2.57 0.26
19 1 -3 1.95 0.31
-19 1 3 1.32 0.23
-19 1 3 1.36 0.22
-17 -1 3 5.03 0.34
17 -1 -3 5.02 0.41
-17 -1 3 4.83 0.35
17 1 -3 2.87 0.31
-17 1 3 3.24 0.24
-17 1 3 3.12 0.25
15 -1 -3 5.46 0.35
-15 -1 3 5.39 0.33
-15 -1 3 5.36 0.29
-15 1 3 4.81 0.29
15 1 -3 5.69 0.4
-15 1 3 5.55 0.32
13 -1 -3 1.86 0.21
-13 -1 3 1.51 0.17
-13 -1 3 1.68 0.16
13 1 -3 0.75 0.19
-13 1 3 0.48 0.13
-13 1 3 0.55 0.14
11 -1 -3 5.72 0.33
-11 -1 3 6.08 0.29
-11 -1 3 6.42 0.28
-11 1 3 3.15 0.21
11 1 -3 3.32 0.3
-11 1 3 3.32 0.2
9 -1 -3 120.94 3.56
9 -1 -3 111.43 3.59
-9 -1 3 114.04 3.56
-9 -1 3 117.52 3.55
9 1 -3 119.18 3.66
-9 1 3 114.49 3.61
-9 1 3 120.02 3.61
-7 -1 3 60.39 1.9
-7 -1 3 61.84 1.91
7 -1 -3 62.8 1.9
7 -1 -3 61.06 1.94
7 -1 -3 62.2 1.91
-7 1 3 70.95 2.2
7 1 -3 72.47 2.21
7 1 -3 70.93 2.25
-7 1 3 72.88 2.22
5 -1 -3 16.05 0.51
-5 -1 3 15.25 0.56
-5 -1 3 15.73 0.52
5 -1 -3 16.23 0.56
5 -1 -3 16.16 0.52
5 1 -3 11.41 0.4
-5 1 3 11.67 0.43
-5 1 3 11.15 0.4
-5 1 3 11.66 0.39
5 1 -3 12.41 0.39
5 1 -3 12.48 0.45
3 -1 -3 371.9 12.1
3 -1 -3 402.69 12.13
3 -1 -3 392.28 12.27
-3 -1 3 399.65 12.18
-3 -1 3 406.2 12.25
-3 -1 3 407.98 12.08
3 1 -3 432.39 13.35
-3 1 3 433.42 13.24
3 1 -3 427.46 13.19
3 1 -3 450.03 13.24
-3 1 3 413.62 13.17
1 -1 -3 22.47 0.69
-1 -1 3 22.71 0.7
1 -1 -3 23.04 0.72
1 -1 -3 22.74 0.73
-1 -1 3 23.51 0.73
-1 -1 3 21.77 0.74
-1 -1 3 22.33 0.72
1 1 -3 26.92 0.81
-1 1 3 26.35 0.83
1 1 -3 27.04 0.83
-1 1 3 25.56 0.84
-1 1 3 26.26 0.85
1 1 -3 26.27 0.85
-1 1 3 26.55 0.85
1 -1 3 92.5 2.76
-1 -1 -3 90.38 2.76
1 -1 3 86.82 2.75
-1 -1 -3 94.09 2.75
1 -1 3 89.22 2.76
-1 -1 -3 88.89 2.78
1 -1 3 86.43 2.74
1 1 3 83.59 2.7
-1 1 -3 88.15 2.69
-1 1 -3 92.04 2.7
1 1 3 83.41 2.71
1 1 3 89.65 2.71
-1 1 -3 90.22 2.71
1 1 3 88.89 2.71
-1 1 -3 90.97 2.71
-3 -1 -3 38.52 1.18
-3 -1 -3 39.3 1.18
3 -1 3 37.07 1.16
3 -1 3 34.83 1.19
3 -1 3 37.14 1.17
3 -1 3 37.18 1.16
3 -1 3 37.45 1.16
3 1 3 34.44 1.09
3 1 3 35.25 1.08
-3 1 -3 37.95 1.1
-3 1 -3 35.24 1.09
3 1 3 31.65 1.1
3 1 3 34.38 1.1
-3 1 -3 36.04 1.09
3 1 3 37 1.14
-3 1 -3 35.48 1.09
-3 1 -3 34.04 1.1
5 -1 3 73.73 2.39
5 -1 3 75.97 2.31
-5 -1 -3 82.84 2.38
-5 -1 -3 74.2 2.35
-5 -1 -3 78.94 2.34
-5 -1 -3 74.7 2.32
5 -1 3 74.14 2.33
-5 -1 -3 76.03 2.34
5 -1 3 72.85 2.33
5 -1 3 75.62 2.32
5 1 3 71.16 2.19
-5 1 -3 76.77 2.22
5 1 3 65.11 2.25
-5 1 -3 73.06 2.17
5 1 3 69.46 2.18
5 1 3 70.41 2.16
-5 1 -3 68.4 2.15
-5 1 -3 73.33 2.17
-5 1 -3 71.24 2.18
5 1 3 68.95 2.16
7 -1 3 115.76 3.64
7 -1 3 117.39 3.63
-7 -1 -3 122.52 3.72
-7 -1 -3 122.01 3.65
-7 -1 -3 118.78 3.63
-7 -1 -3 113.54 3.66
7 -1 3 123.3 3.73
7 1 3 117.24 3.55
7 1 3 119.13 3.53
-7 1 -3 115.35 3.62
7 1 3 115.21 3.55
-7 1 -3 112.83 3.57
-7 1 -3 119.26 3.55
7 1 3 104.89 3.64
-7 1 -3 122.32 3.54
-9 -1 -3 72.92 2.33
-9 -1 -3 75.82 2.29
-9 -1 -3 77.46 2.32
9 -1 3 71.52 2.31
9 -1 3 75.53 2.3
9 1 3 61.71 2.08
-9 1 -3 62.69 1.93
9 1 3 63.36 1.91
-9 1 -3 60.48 1.95
9 1 3 62.58 1.94
-9 1 -3 60.72 2.03
-11 -1 -3 11.28 0.47
-11 -1 -3 12.72 0.45
11 -1 3 12.15 0.47
-11 1 -3 14.41 0.5
-11 1 -3 13.24 0.53
11 1 3 14.65 0.55
11 1 3 15.08 0.75
13 -1 3 14.58 0.58
-13 -1 -3 15 0.54
-13 -1 -3 14.06 0.56
13 1 3 18.12 0.89
13 1 3 16.38 0.65
-13 1 -3 15.86 0.62
-13 1 -3 17.1 0.59
-15 -1 -3 5.78 0.35
-15 -1 -3 4.92 0.37
-15 1 -3 3.57 0.28
-15 1 -3 3.79 0.29
-15 1 -3 3.88 0.25
-17 -1 -3 6.87 0.39
-17 -1 -3 7.06 0.45
-17 1 -3 7.14 0.42
-17 1 -3 6.89 0.39
-19 -1 -3 5.72 0.42
-19 -1 -3 5.34 0.42
-19 1 -3 5.41 0.37
-19 1 -3 4.66 0.36
-21 -1 -3 3.95 0.33
-21 -1 -3 4.08 0.39
-21 1 -3 2.32 0.28
-21 1 -3 2.24 0.32
-23 -1 -3 1.44 0.31
-23 -1 -3 1.53 0.36
-23 1 -3 0.89 0.35
-23 1 -3 0.76 0.27
-25 -1 -3 2.1 0.4
-25 -1 -3 2.23 0.37
-25 1 -3 1.57 0.38
-25 1 -3 0.58 0.31
-27 -1 -3 0.73 0.42
-27 -1 -3 0.63 0.36
-27 1 -3 -0.03 0.41
-27 1 -3 0.33 0.32
-29 -1 -3 0.61 0.46
-29 -1 -3 1.1 0.38
-29 1 -3 0.42 0.47
-30 -2 3 -0.04 0.39
-30 -2 3 -0.27 0.37
-30 2 3 -0.67 0.35
-30 2 3 0.54 0.36
-28 -2 3 7.71 0.62
-28 -2 3 6.44 0.5
-28 2 3 6 0.45
-28 2 3 5.55 0.46
-26 -2 3 14.32 0.72
-26 -2 3 14.41 0.73
-26 2 3 12.91 0.67
-26 2 3 13.55 0.65
-24 -2 3 2.79 0.35
-24 -2 3 2.94 0.34
-24 2 3 2.48 0.32
24 2 -3 1.92 0.34
-24 2 3 2.25 0.31
-22 -2 3 0.9 0.28
-22 -2 3 0.85 0.29
-22 2 3 -0.28 0.23
22 2 -3 0.24 0.31
-22 2 3 0.32 0.24
-20 -2 3 4.14 0.33
-20 -2 3 5.43 0.35
20 2 -3 4.2 0.39
-20 2 3 4.68 0.31
-20 2 3 4.24 0.32
-18 -2 3 4.56 0.33
-18 -2 3 4.72 0.32
18 2 -3 4.09 0.34
-18 2 3 3.94 0.27
-18 2 3 3.51 0.27
-16 -2 3 1.8 0.21
-16 -2 3 1.7 0.22
-16 2 3 0.59 0.17
-16 2 3 0.45 0.16
16 2 -3 0.61 0.23
-14 -2 3 4.37 0.28
-14 -2 3 3.54 0.29
14 -2 -3 4.6 0.32
14 2 -3 7.52 0.43
-14 2 3 6.53 0.31
-14 2 3 6.72 0.33
-12 -2 3 3.12 0.25
12 -2 -3 3.71 0.28
-12 -2 3 3.25 0.23
-12 2 3 5.19 0.26
-12 2 3 5.42 0.27
12 2 -3 5.8 0.37
10 -2 -3 19.07 0.69
-10 -2 3 19.43 0.65
-10 -2 3 18.33 0.63
10 2 -3 24.81 0.9
-10 2 3 25.97 0.83
-10 2 3 26.31 0.84
8 -2 -3 34.41 1.15
-8 -2 3 35.11 1.12
8 -2 -3 35.65 1.12
8 -2 -3 36.3 1.11
-8 -2 3 34.72 1.12
-8 -2 3 36.47 1.26
-8 2 3 41.44 1.29
-8 2 3 41.81 1.3
8 2 -3 40.92 1.35
6 -2 -3 14.73 0.47
6 -2 -3 13.93 0.45
-6 -2 3 14.49 0.58
-6 -2 3 13.87 0.48
6 -2 -3 12.93 0.5
-6 -2 3 14.23 0.47
-6 2 3 13.33 0.44
6 2 -3 12.82 0.51
-6 2 3 13.94 0.46
6 2 -3 14 0.45
-4 -2 3 68.46 2.19
4 -2 -3 71.18 2.15
-4 -2 3 72.54 2.22
-4 -2 3 66.42 2.16
4 -2 -3 72.39 2.16
4 -2 -3 70.97 2.18
4 2 -3 58.24 1.74
-4 2 3 54.53 1.75
-4 2 3 57.32 1.77
4 2 -3 56.53 1.74
4 2 -3 55.8 1.78
-2 -2 3 58.43 1.72
-2 -2 3 56.09 1.68
2 -2 -3 50.82 1.69
-2 -2 3 54.1 1.72
-2 -2 3 55.03 1.69
-2 2 3 61.7 1.87
2 2 -3 62.66 1.89
-2 2 3 60.77 1.86
2 2 -3 57.56 1.86
-2 2 3 59.21 1.87
0 -2 3 167.06 5.1
0 -2 3 165.98 5.13
0 -2 -3 170.74 5.13
0 -2 3 160.68 5.08
0 -2 3 165.56 5.13
0 -2 -3 173.19 5.11
0 -2 3 164.94 5.13
0 2 3 142.53 4.37
0 2 3 138.85 4.33
0 2 3 137.69 4.33
0 2 -3 142.91 4.34
0 2 -3 147.71 4.37
0 2 -3 142.76 4.35
2 -2 3 35.12 1.16
-2 -2 -3 38.5 1.17
2 -2 3 36.72 1.15
-2 -2 -3 37.44 1.17
2 -2 3 36.59 1.15
2 -2 3 38.45 1.16
-2 2 -3 38.05 1.17
-2 2 -3 38.19 1.17
-2 2 -3 36.2 1.15
2 2 3 37.05 1.16
2 2 3 35.55 1.17
2 2 3 37.25 1.16
2 2 3 37.38 1.14
-2 2 -3 37.06 1.14
-2 2 -3 36.7 1.16
2 2 3 39.01 1.19
-4 -2 -3 7.53 0.3
4 -2 3 8.06 0.28
-4 -2 -3 7.55 0.3
4 -2 3 8.12 0.29
-4 -2 -3 8.13 0.32
4 -2 3 7.68 0.28
-4 -2 -3 8.55 0.29
4 -2 3 8.16 0.28
-4 2 -3 9.27 0.31
-4 2 -3 9.07 0.31
4 2 3 8.57 0.33
4 2 3 8.95 0.3
4 2 3 9.31 0.3
-4 2 -3 9.27 0.32
4 2 3 8.81 0.33
-4 2 -3 9.22 0.33
-4 2 -3 9.35 0.31
-4 2 -3 9.28 0.35
4 2 3 9.3 0.42
6 -2 3 104.86 3.29
6 -2 3 104.2 3.29
-6 -2 -3 106.64 3.28
-6 -2 -3 117.58 3.36
6 -2 3 103.65 3.29
-6 -2 -3 104.42 3.31
-6 -2 -3 112.43 3.31
6 2 3 95.65 2.92
6 2 3 96.66 2.95
6 2 3 95.32 2.92
-6 2 -3 92.99 2.99
6 2 3 95.89 2.94
-6 2 -3 99.64 2.94
-6 2 -3 101.08 2.93
6 2 3 94.22 2.91
-6 2 -3 98.87 2.93
-6 2 -3 95.27 2.92
6 2 3 87.45 3.02
-8 -2 -3 38.84 1.3
-8 -2 -3 42.14 1.3
8 -2 3 39.88 1.28
-8 -2 -3 42.51 1.38
-8 -2 -3 40.63 1.26
8 -2 3 40.84 1.27
8 2 3 37.8 1.45
-8 2 -3 41.56 1.34
-8 2 -3 40.76 1.41
8 2 3 42.79 1.29
8 2 3 42.39 1.33
-8 2 -3 45.16 1.32
10 -2 3 48.97 1.59
-10 -2 -3 49.66 1.62
10 -2 3 50.17 1.6
-10 -2 -3 52.69 1.61
-10 -2 -3 53.49 1.58
10 2 3 52.25 1.88
10 2 3 55.74 1.73
-10 2 -3 52.98 1.73
-10 2 -3 56.63 1.7
-12 -2 -3 23.81 0.81
12 -2 3 23.88 0.82
-12 2 -3 23.13 0.83
12 2 3 23.79 0.84
-12 2 -3 24.32 0.79
12 2 3 23.79 1.01
-14 -2 -3 14.47 0.56
-14 -2 -3 14.45 0.56
-14 2 -3 12.05 0.46
-14 2 -3 12.32 0.52
14 2 3 12.88 0.77
14 2 3 10.81 0.56
-16 -2 -3 4.55 0.35
-16 -2 -3 4.94 0.36
-16 2 -3 2.34 0.13
-16 2 -3 2.5 0.21
-16 2 -3 2.55 0.28
-16 2 -3 2.79 0.22
-18 -2 -3 14.48 0.62
-18 -2 -3 14.8 0.65
-18 2 -3 13.95 0.56
-18 2 -3 14.09 0.63
-20 -2 -3 9.23 0.53
-20 -2 -3 9.54 0.52
-20 2 -3 6.43 0.41
-20 2 -3 6.57 0.51
-22 -2 -3 3.44 0.34
-22 -2 -3 2.55 0.35
-22 2 -3 1.9 0.28
-22 2 -3 1.93 0.36
-24 -2 -3 1.03 0.34
-24 -2 -3 1.23 0.34
-24 2 -3 0.73 0.29
-24 2 -3 1.02 0.35
-26 -2 -3 0.74 0.41
-26 -2 -3 0.68 0.34
-26 2 -3 0.07 0.41
-26 2 -3 0.63 0.3
-28 -2 -3 1.23 0.46
-28 -2 -3 0.81 0.38
-28 2 -3 0.3 0.4
-29 -3 3 -0.03 0.38
-29 -3 3 -0.27 0.37
-29 3 3 0.56 0.34
-29 3 3 -0.01 0.34
-27 -3 3 9.2 0.64
-27 -3 3 8.77 0.63
-27 3 3 6.58 0.47
-27 3 3 7.04 0.54
-25 -3 3 9 0.59
-25 -3 3 8.37 0.59
-25 3 3 8.18 0.51
-25 3 3 6.89 0.54
25 3 -3 7.74 0.61
-23 -3 3 5.83 0.49
-23 -3 3 5.75 0.41
-23 3 3 5.14 0.36
-23 3 3 4.33 0.35
23 3 -3 4.58 0.43
-21 -3 3 8.3 0.49
-21 -3 3 7.54 0.5
-21 3 3 5.97 0.4
21 3 -3 5.86 0.52
-21 3 3 4.99 0.42
-19 -3 3 1.72 0.27
-19 -3 3 2.19 0.27
19 3 -3 2.01 0.3
-19 3 3 1.95 0.22
-19 3 3 2.15 0.24
-17 -3 3 3.31 0.27
-17 -3 3 4.37 0.3
-17 3 3 1.8 0.21
-17 3 3 1.49 0.19
17 3 -3 1.4 0.29
-15 -3 3 3.89 0.3
-15 -3 3 4.21 0.32
15 3 -3 7.42 0.42
-15 3 3 6.61 0.32
-15 3 3 7.35 0.35
-13 -3 3 15.37 0.56
-13 -3 3 15.18 0.57
-13 3 3 18.32 0.64
13 3 -3 19.24 0.73
-13 3 3 18.15 0.63
-11 -3 3 30.12 0.99
11 -3 -3 31.63 0.99
-11 -3 3 29.32 0.99
-11 3 3 22.89 0.76
-11 3 3 22.82 0.74
11 3 -3 23.12 0.83
9 -3 -3 22.49 0.73
9 -3 -3 23.38 0.74
-9 -3 3 21.95 0.74
-9 -3 3 22.78 0.75
-9 3 3 31.96 0.99
-9 3 3 30.34 0.98
9 3 -3 30.86 1.05
7 -3 -3 18.09 0.56
-7 -3 3 16.46 0.69
-7 -3 3 17.59 0.59
7 -3 -3 18.4 0.58
-7 -3 3 17.14 0.58
-7 3 3 10.88 0.36
7 3 -3 10.15 0.44
-7 3 3 10.59 0.34
-7 3 3 10.74 0.38
-5 -3 3 5.58 0.29
-5 -3 3 4.74 0.21
-5 -3 3 4.71 0.21
-5 -3 3 4.45 0.29
5 -3 -3 4.73 0.17
5 -3 -3 4.86 0.2
5 3 -3 6.48 0.23
5 3 -3 5.55 0.3
-5 3 3 5.46 0.24
-5 3 3 6.58 0.28
-5 3 3 5.42 0.18
-5 3 3 5.81 0.21
-3 -3 3 64.04 2.16
-3 -3 3 68.07 2.16
-3 -3 3 72.18 2.14
3 -3 -3 72.77 2.13
-3 -3 3 71.07 2.12
3 -3 -3 68.08 2.12
-3 3 3 59 1.86
3 3 -3 60.51 1.84
3 3 -3 61.8 1.84
-3 3 3 60.13 1.85
3 3 -3 57.6 1.87
-3 3 3 58.58 1.84
1 -3 -3 86.16 2.6
-1 -3 3 84.02 2.57
-1 -3 3 81.18 2.58
-1 -3 3 83.72 2.58
-1 -3 3 82.86 2.6
1 -3 -3 87.92 2.59
1 3 -3 96.64 2.93
1 3 -3 94.82 2.9
-1 3 3 92.26 2.91
-1 3 3 95.54 2.93
-1 3 3 91.86 2.92
-1 3 3 93.48 2.92
1 3 -3 100.27 2.91
-1 -3 -3 192.13 5.94
1 -3 3 190.91 5.92
1 -3 3 189.65 5.92
-1 -3 -3 200.96 5.92
1 -3 3 182.21 5.87
1 -3 3 190.65 5.96
1 -3 3 193.07 5.93
-1 -3 -3 202.51 5.92
-1 3 -3 204.15 6.1
-1 3 -3 197.76 6.1
1 3 3 203.75 6.23
1 3 3 199.56 6.19
-1 3 -3 197.41 6.09
1 3 3 196.67 6.14
3 -3 3 28.14 0.9
-3 -3 -3 29.31 0.92
-3 -3 -3 28.42 0.91
3 -3 3 28.68 0.9
3 -3 3 28.67 0.91
3 -3 3 29.3 0.91
-3 -3 -3 29.04 0.94
-3 3 -3 29.15 0.89
-3 3 -3 28.05 0.88
3 3 3 27.96 0.9
-3 3 -3 27.32 0.89
-3 3 -3 27.94 0.88
3 3 3 28.73 0.94
3 3 3 28.22 0.87
3 3 3 28.44 0.89
-3 3 -3 27.74 0.89
5 -3 3 1.84 0.13
5 -3 3 1.87 0.13
-5 -3 -3 2.17 0.15
-5 -3 -3 1.96 0.16
-5 -3 -3 2.37 0.2
-5 -3 -3 1.65 0.09
5 -3 3 1.97 0.13
-5 3 -3 1.77 0.11
5 3 3 1.9 0.13
5 3 3 2.09 0.24
-5 3 -3 1.82 0.13
-5 3 -3 1.7 0.12
5 3 3 1.85 0.15
5 3 3 1.62 0.09
-5 3 -3 1.73 0.13
-5 3 -3 1.56 0.17
-7 -3 -3 9.02 0.33
7 -3 3 7.8 0.31
-7 -3 -3 8.29 0.33
-7 -3 -3 8.6 0.28
7 -3 3 8 0.31
7 3 3 4.05 0.16
-7 3 -3 3.99 0.17
-7 3 -3 4.23 0.32
7 3 3 5.74 0.43
-7 3 -3 3.21 0.18
-7 3 -3 3.8 0.18
-9 -3 -3 45.63 1.41
9 -3 3 43.3 1.39
9 -3 3 46.34 1.39
-9 -3 -3 41.86 1.36
9 3 3 44.46 1.64
-9 3 -3 48.53 1.47
-9 3 -3 47.13 1.43
9 3 3 46.59 1.44
-9 3 -3 45.85 1.58
-9 3 -3 43.58 1.44
-9 3 -3 49.91 1.51
9 3 3 50.2 1.5
11 -3 3 49.55 1.53
11 -3 3 48.51 1.55
-11 -3 -3 50 1.51
-11 -3 -3 47.22 1.55
-11 3 -3 49.07 1.52
-11 3 -3 49.42 1.48
-11 3 -3 46 1.44
11 3 3 43.3 1.69
-11 3 -3 46.35 1.44
11 3 3 48.48 1.52
-13 -3 -3 2.6 0.23
-13 -3 -3 2.22 0.21
-13 3 -3 2.47 0.2
13 3 3 3.04 0.28
13 3 3 2.39 0.42
-13 3 -3 2.47 0.23
-13 3 -3 2.66 0.12
-13 3 -3 3.02 0.14
-15 -3 -3 12.99 0.53
-15 -3 -3 12.67 0.53
-15 3 -3 13.26 0.54
-15 3 -3 12.23 0.42
-15 3 -3 12.4 0.49
-15 3 -3 12.84 0.48
-17 -3 -3 40.05 1.34
-17 -3 -3 40.43 1.35
-17 3 -3 34.55 1.13
-17 3 -3 33.9 1.17
-19 -3 -3 1.93 0.28
-19 -3 -3 2.04 0.31
-19 3 -3 0.59 0.2
-19 3 -3 0.51 0.25
-21 -3 -3 8.68 0.58
-21 -3 -3 7.8 0.52
-21 3 -3 6.72 0.49
-21 3 -3 5.9 0.42
-23 -3 -3 1.33 0.33
-23 -3 -3 0.88 0.31
-23 3 -3 0.85 0.26
-23 3 -3 0.83 0.33
-25 -3 -3 1.56 0.36
-25 -3 -3 1.81 0.4
-25 3 -3 1.45 0.31
-25 3 -3 1.79 0.42
-27 -3 -3 0.51 0.43
-27 -3 -3 0.3 0.36
-27 3 -3 -0.16 0.4
-29 -3 -3 0.61 0.42
-29 -3 -3 0.73 0.41
-29 3 -3 -0.56 0.45
-30 -4 3 1.25 0.42
-30 -4 3 1.03 0.4
-30 4 3 1.88 0.39
-30 4 3 2.2 0.38
-28 -4 3 0.82 0.36
-28 -4 3 0.63 0.38
-28 4 3 0.89 0.33
-28 4 3 0.65 0.33
-26 -4 3 3.1 0.41
-26 -4 3 3.32 0.39
-26 4 3 3.13 0.34
-26 4 3 2.91 0.35
26 4 -3 2.91 0.42
-24 -4 3 10.07 0.61
-24 -4 3 9.53 0.6
24 4 -3 10.23 0.65
-24 4 3 8.96 0.55
-24 4 3 8.9 0.51
-22 -4 3 14.38 0.69
-22 -4 3 15.58 0.65
22 4 -3 14.5 0.73
-22 4 3 13.45 0.62
-22 4 3 14.11 0.6
-20 -4 3 8.32 0.5
-20 -4 3 9.12 0.47
-20 4 3 6.75 0.43
20 4 -3 7.41 0.54
-20 4 3 6.96 0.4
-18 -4 3 9.3 0.48
-18 -4 3 9.32 0.45
-18 4 3 5.72 0.34
-18 4 3 6.13 0.37
18 4 -3 6.23 0.49
-16 -4 3 4.72 0.35
-16 -4 3 4.48 0.35
-16 4 3 3.62 0.28
-16 4 3 3.41 0.26
16 4 -3 4.1 0.36
-14 -4 3 11.57 0.47
-14 -4 3 12.14 0.49
-14 4 3 17.8 0.61
14 4 -3 15.92 0.68
-14 4 3 17.1 0.59
12 -4 -3 14.33 0.5
-12 -4 3 15.12 0.54
-12 -4 3 14.05 0.52
12 4 -3 10.1 0.49
-12 4 3 10.88 0.36
-12 4 3 10.36 0.38
-12 4 3 10.21 0.4
-10 -4 3 59.07 1.85
10 -4 -3 60.58 1.83
-10 -4 3 58.17 1.85
10 -4 -3 58.69 1.83
10 4 -3 49.33 1.65
-10 4 3 52.63 1.56
-10 4 3 50.12 1.57
-10 4 3 50.38 1.58
-8 -4 3 118.31 3.63
8 -4 -3 122.02 3.61
-8 -4 3 116.33 3.62
8 -4 -3 122.09 3.62
-8 -4 3 112.02 3.74
-8 4 3 121.54 3.76
-8 4 3 125.75 3.74
8 4 -3 122.07 3.82
-8 4 3 121.88 3.75
-6 -4 3 24.26 0.91
6 -4 -3 27.24 0.81
-6 -4 3 24.9 0.81
-6 -4 3 24.12 0.81
6 -4 -3 25.9 0.79
6 4 -3 28.01 0.96
-6 4 3 28.92 0.9
-6 4 3 27.45 0.87
-6 4 3 28.68 0.88
-4 -4 3 24.37 0.77
-4 -4 3 25.46 0.76
-4 -4 3 23.37 0.81
4 -4 -3 24.62 0.74
-4 -4 3 22.12 0.82
4 4 -3 37.23 1.09
4 4 -3 35.1 1.08
4 4 -3 33.25 1.13
-4 4 3 32.67 1.08
-4 4 3 33.08 1.09
-4 4 3 34.43 1.09
-2 -4 3 128.63 4.01
2 -4 -3 136.08 3.98
2 -4 -3 125.68 3.97
-2 -4 3 130.39 4.01
-2 -4 3 128.4 3.97
-2 -4 3 132.9 4.02
2 4 -3 121.24 3.71
2 4 -3 124.49 3.72
-2 4 3 121.35 3.73
-2 4 3 118.98 3.74
-2 4 3 120.17 3.73
2 4 -3 124.53 3.75
-2 4 3 120.96 3.76
0 -4 3 5.21 0.2
0 -4 -3 5.16 0.24
0 -4 -3 5.31 0.22
0 -4 3 5.07 0.2
0 -4 -3 5.66 0.21
0 4 3 6.99 0.3
0 4 -3 6.56 0.25
0 4 3 6.82 0.28
0 4 -3 7.93 0.31
0 4 -3 7 0.25
0 4 3 6.9 0.26
-2 -4 -3 48.99 1.51
-2 -4 -3 50.71 1.52
2 -4 3 48.4 1.48
-2 -4 -3 47.04 1.49
2 -4 3 49.44 1.49
2 -4 3 48 1.49
-2 -4 -3 45.75 1.49
2 -4 3 49.5 1.5
2 -4 3 44.63 1.48
-2 4 -3 62.35 1.89
-2 4 -3 60.68 1.91
2 4 3 62.01 1.91
-2 4 -3 62.64 1.89
2 4 3 61.07 1.9
2 4 3 60.8 1.93
4 -4 3 14.41 0.47
-4 -4 -3 13.62 0.48
4 -4 3 13.76 0.47
-4 -4 -3 14.96 0.5
4 -4 3 13.68 0.48
4 -4 3 14.13 0.46
4 -4 3 13.89 0.47
-4 -4 -3 15.65 0.53
4 4 3 10.12 0.31
-4 4 -3 9.26 0.37
-4 4 -3 9.54 0.34
4 4 3 10.41 0.44
-4 4 -3 9.7 0.35
-4 4 -3 9.58 0.34
-4 4 -3 10.11 0.33
-4 4 -3 10.2 0.34
4 4 3 9.74 0.36
-6 -4 -3 19.26 0.6
6 -4 3 18.44 0.61
6 -4 3 18.67 0.62
-6 -4 -3 20.25 0.7
-6 -4 -3 20.08 0.67
-6 -4 -3 18.06 0.63
6 4 3 26.04 0.81
6 4 3 25.25 0.94
-6 4 -3 26.01 0.83
6 4 3 25.87 0.85
-6 4 -3 24.89 0.89
-6 4 -3 26.18 0.82
-6 4 -3 27.41 0.82
6 4 3 25.97 0.85
-8 -4 -3 44.75 1.33
-8 -4 -3 42.94 1.37
8 -4 3 42.13 1.35
8 -4 3 43.31 1.35
-8 4 -3 33.08 1.04
8 4 3 32.96 1.09
8 4 3 35.17 1.04
-8 4 -3 34.85 1.06
8 4 3 34.93 1.1
8 4 3 30.71 1.21
-8 4 -3 34.77 1.05
-8 4 -3 31 1.15
-10 -4 -3 14.19 0.53
10 -4 3 14.5 0.52
10 -4 3 15.09 0.52
-10 -4 -3 15.14 0.48
10 4 3 20.55 0.65
-10 4 -3 20.84 0.72
-10 4 -3 20.42 0.67
-10 4 -3 20.3 0.64
10 4 3 21.2 0.73
10 4 3 17.71 0.87
12 -4 3 16.97 0.59
-12 -4 -3 17.05 0.62
-12 -4 -3 16.54 0.61
12 4 3 16.1 0.51
-12 4 -3 16.18 0.61
12 4 3 15.66 0.63
-12 4 -3 15.91 0.54
-12 4 -3 15.89 0.51
-12 4 -3 15.37 0.51
12 4 3 14.97 0.85
-14 -4 -3 10.94 0.48
-14 -4 -3 10.13 0.46
14 4 3 13.13 0.62
-14 4 -3 13.35 0.45
14 4 3 12.79 0.81
14 4 3 13.65 0.44
-14 4 -3 13.72 0.49
-14 4 -3 13.02 0.54
-16 -4 -3 32.46 1.12
-16 -4 -3 33.7 1.14
-16 4 -3 28.06 0.92
-16 4 -3 27.52 0.92
16 4 3 28.27 1.34
-16 4 -3 26.83 0.97
-18 -4 -3 3.19 0.32
-18 -4 -3 3.65 0.31
18 4 3 3.23 0.61
-18 4 -3 3.01 0.3
-18 4 -3 3.64 0.25
-20 -4 -3 14.69 0.65
-20 -4 -3 13.33 0.64
-20 4 -3 12.14 0.63
-20 4 -3 11.34 0.52
-22 -4 -3 0.38 0.33
-22 -4 -3 0.39 0.29
-22 4 -3 0.37 0.32
-22 4 -3 0.29 0.23
-24 -4 -3 0.56 0.34
-24 -4 -3 0.93 0.35
-24 4 -3 0.94 0.27
-24 4 -3 1.17 0.39
-26 -4 -3 3.75 0.44
-26 -4 -3 4.49 0.48
-26 4 -3 3.62 0.48
-28 -4 -3 0.2 0.42
-28 -4 -3 0.85 0.4
-28 4 -3 -0.02 0.39
-29 -5 3 1.49 0.42
-29 -5 3 2.43 0.44
-29 5 3 1.92 0.38
-29 5 3 2.39 0.37
-27 -5 3 1.47 0.38
-27 -5 3 2.43 0.4
27 5 -3 2 0.44
-27 5 3 1.61 0.33
-27 5 3 1.99 0.33
-25 -5 3 7.12 0.59
-25 -5 3 8.44 0.59
-25 5 3 7.83 0.53
-25 5 3 8.44 0.51
25 5 -3 8.34 0.65
-23 -5 3 4 0.36
-23 -5 3 3.86 0.38
23 5 -3 4.14 0.43
-23 5 3 4 0.33
-23 5 3 3.87 0.31
-21 -5 3 20.76 0.79
-21 -5 3 19.83 0.82
-21 5 3 19.99 0.74
21 5 -3 19.79 0.84
-21 5 3 19.8 0.75
-19 -5 3 7.71 0.48
-19 -5 3 8.06 0.47
-19 5 3 5.11 0.36
-19 5 3 5.33 0.34
19 5 -3 5.45 0.45
-17 -5 3 15.72 0.65
-17 -5 3 17.16 0.66
17 5 -3 16.08 0.7
-17 5 3 16.02 0.59
-17 5 3 16.25 0.61
-15 -5 3 31 1.06
15 -5 -3 30.9 1
-15 -5 3 31.99 1.05
-15 5 3 25.93 0.87
-15 5 3 27.25 0.88
15 5 -3 26.19 0.98
13 -5 -3 13.26 0.46
-13 -5 3 12.89 0.5
-13 -5 3 13.56 0.52
-13 5 3 9 0.37
13 5 -3 9.68 0.51
-13 5 3 8.86 0.35
11 -5 -3 84.57 2.56
-11 -5 3 80.17 2.58
-11 -5 3 84.79 2.59
-11 5 3 73.29 2.26
-11 5 3 71.67 2.27
-11 5 3 75.86 2.26
11 5 -3 72.89 2.35
9 -5 -3 201.73 6
-9 -5 3 191.87 6.01
-9 -5 3 199.12 6.07
9 -5 -3 194.9 6.01
9 5 -3 172.3 5.37
-9 5 3 170.87 5.31
-9 5 3 174.82 5.33
-9 5 3 177.61 5.29
-7 -5 3 148.69 4.88
7 -5 -3 162.19 4.77
-7 -5 3 157.94 4.79
7 -5 -3 163.63 4.78
-7 -5 3 151.07 4.79
-7 5 3 163.55 4.81
-7 5 3 159.7 4.84
-7 5 3 155.15 4.8
7 5 -3 152.13 4.87
-5 -5 3 22.51 0.81
-5 -5 3 22.4 0.74
-5 -5 3 22.24 0.73
5 -5 -3 22.87 0.7
5 -5 -3 22.86 0.72
-5 5 3 30.1 0.95
-5 5 3 28.51 0.96
-5 5 3 29.5 0.92
-5 5 3 29.45 0.92
5 5 -3 32.24 1.05
3 -5 -3 115.76 3.7
-3 -5 3 122.19 3.7
3 -5 -3 129.03 3.71
-3 -5 3 121.96 3.74
-3 -5 3 124.3 3.73
-3 -5 3 116.76 3.7
3 -5 -3 118.84 3.7
3 5 -3 141.86 4.19
3 5 -3 141.89 4.15
-3 5 3 132.36 4.16
-3 5 3 133.68 4.19
-3 5 3 132.06 4.15
3 5 -3 133.42 4.19
1 -5 -3 57.8 1.82
-1 -5 3 59.52 1.81
-1 -5 3 61.43 1.85
-1 -5 3 58.82 1.81
-1 -5 3 57.62 1.81
1 -5 -3 58.16 1.83
1 5 -3 45.98 1.47
1 5 -3 48.75 1.43
-1 5 3 43.96 1.44
1 5 -3 44.39 1.44
-1 5 3 47.04 1.43
1 5 -3 47.35 1.43
-1 5 3 45.28 1.47
-1 -5 -3 2.34 0.15
-1 -5 -3 2.23 0.12
1 -5 3 2.32 0.12
1 -5 3 2.27 0.14
1 -5 3 2.6 0.15
-1 -5 -3 2.47 0.19
1 -5 3 2.35 0.14
1 5 3 5.49 0.28
-1 5 -3 5.76 0.23
-1 5 -3 6.17 0.21
1 5 3 5.91 0.24
-1 5 -3 6.28 0.22
1 5 3 5.86 0.26
-1 5 -3 7.2 0.29
3 -5 3 20.26 0.65
-3 -5 -3 21.57 0.7
-3 -5 -3 20.17 0.65
3 -5 3 20.35 0.66
3 -5 3 20.93 0.66
3 -5 3 19.45 0.64
-3 -5 -3 21.23 0.7
3 -5 3 19.49 0.66
3 5 3 25.68 0.86
-3 5 -3 23.71 0.81
-3 5 -3 25.58 0.78
3 5 3 24.46 0.79
3 5 3 24.2 0.8
3 5 3 24.71 0.76
-3 5 -3 24.89 0.79
5 -5 3 1.92 0.14
-5 -5 -3 2.58 0.17
5 -5 3 2.19 0.16
5 -5 3 1.93 0.13
-5 -5 -3 2.1 0.23
-5 5 -3 0.56 0.13
5 5 3 0.63 0.11
5 5 3 0.65 0.21
-5 5 -3 0.61 0.07
-5 5 -3 0.84 0.09
5 5 3 0.66 0.13
7 -5 3 84.13 2.66
-7 -5 -3 90.54 2.66
-7 -5 -3 86.62 2.68
7 -5 3 86.65 2.67
-7 5 -3 80.14 2.38
-7 5 -3 79.05 2.39
7 5 3 78.81 2.38
-7 5 -3 76.15 2.46
-7 5 -3 76.81 2.38
7 5 3 79.81 2.41
7 5 3 73.46 2.51
7 5 3 76.78 2.42
9 -5 3 24.12 0.78
-9 -5 -3 23.81 0.79
-9 -5 -3 24.32 0.75
9 -5 3 22.91 0.77
9 5 3 18.22 0.57
-9 5 -3 16.75 0.56
9 5 3 16.6 0.82
9 5 3 18.48 0.63
-9 5 -3 16.84 0.56
-9 5 -3 16.76 0.62
-9 5 -3 15.56 0.68
-11 -5 -3 23.29 0.8
-11 -5 -3 24.81 0.75
-11 -5 -3 23.05 0.81
11 -5 3 23.69 0.78
11 -5 3 23.12 0.79
-11 5 -3 24.76 0.79
11 5 3 24.77 0.79
11 5 3 26.11 0.87
11 5 3 22.64 1.07
-11 5 -3 24.27 0.77
-11 5 -3 23.38 0.85
-13 -5 -3 0.79 0.17
-13 -5 -3 0.71 0.19
13 -5 3 0.62 0.16
-13 5 -3 1.64 0.22
13 5 3 2.35 0.17
-13 5 -3 2.33 0.18
-13 5 -3 1.99 0.14
-13 5 -3 1.96 0.15
13 5 3 2.09 0.27
13 5 3 1.01 0.41
-15 -5 -3 7.03 0.43
-15 -5 -3 7.72 0.4
15 5 3 4.61 0.23
-15 5 -3 4.88 0.27
15 5 3 4.45 0.58
-15 5 -3 4.82 0.23
-15 5 -3 4.12 0.35
15 5 3 6.22 0.48
-17 -5 -3 16.93 0.69
-17 -5 -3 16.35 0.69
-17 5 -3 19.17 0.74
-17 5 -3 19.02 0.67
17 5 3 18.43 0.62
17 5 3 19.41 1.16
-19 -5 -3 5.07 0.42
-19 -5 -3 4.79 0.37
-19 5 -3 4.36 0.36
-19 5 -3 4.45 0.34
19 5 3 5.11 0.77
-21 -5 -3 1.17 0.31
-21 -5 -3 2.45 0.35
-21 5 -3 1.09 0.22
-21 5 -3 1.14 0.33
-23 -5 -3 1.88 0.37
-23 -5 -3 1.93 0.37
-23 5 -3 2.5 0.28
-23 5 -3 3.01 0.4
-25 -5 -3 7.25 0.51
-25 -5 -3 5.74 0.48
-25 5 -3 6.68 0.53
-27 -5 -3 2.27 0.46
-27 -5 -3 1.96 0.42
-27 5 -3 1.64 0.45
-28 -6 3 3.16 0.44
-28 -6 3 3.7 0.46
28 6 -3 2.97 0.47
-28 6 3 2.44 0.37
-28 6 3 3.29 0.37
-26 -6 3 1.27 0.36
-26 -6 3 0.67 0.37
-26 6 3 1.45 0.31
-26 6 3 1.58 0.29
26 6 -3 1.23 0.41
-24 -6 3 2.17 0.36
-24 -6 3 2.6 0.37
-24 6 3 2.54 0.3
-24 6 3 2.99 0.31
24 6 -3 2.83 0.43
-22 -6 3 3.27 0.36
-22 -6 3 3.92 0.37
-22 6 3 5.89 0.42
-22 6 3 6.08 0.4
22 6 -3 5.95 0.49
-20 -6 3 11.55 0.56
-20 -6 3 12.39 0.6
-20 6 3 11.39 0.51
-20 6 3 11.74 0.52
20 6 -3 11.71 0.62
-18 -6 3 21.37 0.77
-18 -6 3 20.13 0.8
-18 6 3 20 0.71
-18 6 3 19.6 0.71
18 6 -3 19.97 0.85
-16 -6 3 17.47 0.68
-16 -6 3 17.43 0.68
16 -6 -3 17.88 0.6
-16 6 3 16.53 0.58
16 6 -3 15.46 0.74
-16 6 3 16.45 0.6
-14 -6 3 50.54 1.63
-14 -6 3 51.02 1.64
14 -6 -3 51.25 1.59
-14 6 3 44.84 1.39
-14 6 3 44.75 1.4
14 6 -3 42.92 1.5
12 -6 -3 51.57 1.58
-12 -6 3 50.79 1.61
-12 -6 3 49.97 1.62
12 6 -3 40.92 1.38
-12 6 3 39.63 1.25
-12 6 3 39.1 1.26
10 -6 -3 83.48 2.59
10 -6 -3 86.28 2.59
-10 -6 3 82.68 2.62
-10 -6 3 85.02 2.62
-10 6 3 69.22 2.15
-10 6 3 70.15 2.13
-10 6 3 69.71 2.13
10 6 -3 68.25 2.23
8 -6 -3 92.29 2.83
8 -6 -3 94.56 2.84
-8 -6 3 92.84 2.86
-8 -6 3 90.46 2.85
-8 6 3 86.96 2.65
-8 6 3 86.56 2.63
8 6 -3 88.19 2.8
-8 6 3 83.72 2.63
8 6 -3 85.48 2.72
-6 -6 3 272.53 8.37
-6 -6 3 266.83 8.41
6 -6 -3 272.54 8.29
6 -6 -3 271.41 8.26
-6 -6 3 275.87 8.35
-6 6 3 254.92 8.13
6 6 -3 269.49 8.13
-6 6 3 263.39 8.04
-6 6 3 262.86 8.06
6 6 -3 255.73 8.08
-6 6 3 276.6 8.16
4 -6 -3 35.18 1.09
-4 -6 3 35.04 1.1
4 -6 -3 34.39 1.07
-4 -6 3 35.3 1.15
4 -6 -3 34.58 1.07
-4 -6 3 35.22 1.1
-4 6 3 29.93 0.99
-4 6 3 31.93 0.97
4 6 -3 29.78 1.05
4 6 -3 31.48 1.03
2 -6 -3 177.01 5.61
-2 -6 3 192.82 5.7
2 -6 -3 179.25 5.63
-2 -6 3 189.57 5.65
-2 -6 3 184.4 5.68
-2 -6 3 183.69 5.69
-2 6 3 194.73 5.92
2 6 -3 192.25 5.89
-2 6 3 191.13 5.95
2 6 -3 183.66 5.88
2 6 -3 199.8 5.89
-2 6 3 190.69 6.03
0 -6 3 37.41 1.17
0 -6 -3 37.09 1.17
0 -6 3 36.94 1.16
0 -6 -3 37.99 1.21
0 -6 3 36.39 1.15
0 -6 3 39.45 1.19
0 -6 -3 36.24 1.15
0 6 -3 41.71 1.37
0 6 -3 43.62 1.33
0 6 -3 42.4 1.34
0 6 3 42.05 1.35
0 6 3 42.92 1.38
0 6 3 42.2 1.33
0 6 -3 44.74 1.33
2 -6 3 137.05 4.31
-2 -6 -3 138.84 4.33
2 -6 3 140.81 4.29
2 -6 3 143.13 4.3
2 -6 3 135.96 4.35
2 -6 3 139.29 4.29
-2 -6 -3 149.35 4.34
-2 6 -3 125.68 3.82
-2 6 -3 129.24 3.87
-2 6 -3 123.7 3.81
-2 6 -3 123.88 3.84
2 6 3 122.62 3.86
2 6 3 125.88 3.82
2 6 3 123.45 3.83
4 -6 3 52.7 1.6
4 -6 3 50.36 1.61
4 -6 3 51.41 1.58
-4 -6 -3 55.62 1.67
-4 -6 -3 50.91 1.6
4 -6 3 51.03 1.61
4 -6 3 50.4 1.59
4 6 3 39.57 1.29
-4 6 -3 38.82 1.18
-4 6 -3 37.79 1.22
4 6 3 38.79 1.21
4 6 3 36.69 1.21
6 -6 3 17.29 0.57
6 -6 3 16.42 0.55
6 -6 3 17.31 0.58
-6 -6 -3 17.42 0.57
-6 6 -3 14.96 0.49
6 6 3 14.81 0.5
-6 6 -3 14.38 0.51
6 6 3 15.31 0.65
6 6 3 14.26 0.54
6 6 3 15.05 0.53
-6 6 -3 15.39 0.48
6 6 3 15.28 0.51
-8 -6 -3 61.12 1.89
-8 -6 -3 61.91 1.85
8 -6 3 58.64 1.88
8 6 3 50.45 1.59
8 6 3 48.81 1.73
-8 6 -3 49.71 1.54
8 6 3 48.28 1.58
8 6 3 50.81 1.55
-8 6 -3 50.51 1.55
-8 6 -3 50.26 1.64
-8 6 -3 49.59 1.55
-10 -6 -3 59.19 1.89
10 -6 3 59.76 1.87
-10 -6 -3 59.57 1.88
-10 -6 -3 61.47 1.84
-10 6 -3 51.17 1.54
10 6 3 51.45 1.55
10 6 3 48.87 1.6
-10 6 -3 48.98 1.6
-10 6 -3 50 1.54
10 6 3 46.77 1.78
-12 -6 -3 26.07 0.87
-12 -6 -3 23.9 0.8
-12 -6 -3 26.61 0.88
12 -6 3 25.56 0.85
12 6 3 26.2 1.2
-12 6 -3 28.82 0.91
-12 6 -3 28.54 0.92
-12 6 -3 30.31 1
12 6 3 29.49 1.02
12 6 3 29.12 0.93
-14 -6 -3 24.86 0.9
-14 -6 -3 25.7 0.88
14 6 3 19.19 0.76
14 6 3 15.96 0.96
-14 6 -3 17.17 0.59
14 6 3 17.62 0.61
-14 6 -3 17.99 0.59
-14 6 -3 18.2 0.71
-14 6 -3 18.16 0.61
-16 -6 -3 13.63 0.57
-16 -6 -3 12.96 0.59
-16 6 -3 14.36 0.63
-16 6 -3 14.67 0.54
16 6 3 14.71 0.51
16 6 3 13.34 0.94
-18 -6 -3 6.37 0.47
-18 -6 -3 6.38 0.47
18 6 3 4.13 0.24
-18 6 -3 4.24 0.31
-18 6 -3 3.75 0.33
18 6 3 3.91 0.71
-20 -6 -3 0.69 0.3
-20 -6 -3 0.8 0.31
-20 6 -3 0.58 0.2
-20 6 -3 0.33 0.27
20 6 3 0.56 0.6
-22 -6 -3 1.05 0.34
-22 -6 -3 1.95 0.36
-22 6 -3 0.88 0.34
-22 6 -3 1.21 0.23
-24 -6 -3 9.92 0.67
-24 -6 -3 9.33 0.66
-24 6 -3 8.15 0.64
-26 -6 -3 4.36 0.46
-26 -6 -3 3.53 0.44
-26 6 -3 4.03 0.49
-28 -6 -3 2.36 0.46
-28 -6 -3 2.15 0.43
-28 6 -3 2.01 0.48
-29 -7 3 0.89 0.42
-29 -7 3 1.47 0.43
29 7 -3 2.36 0.46
-29 7 3 2.37 0.37
-27 -7 3 3.27 0.44
-27 -7 3 3.05 0.44
-27 7 3 2.19 0.32
27 7 -3 2.34 0.46
-27 7 3 1.99 0.34
-25 -7 3 0.79 0.34
-25 -7 3 0.05 0.33
-25 7 3 0.71 0.26
-25 7 3 0.57 0.25
25 7 -3 0.67 0.38
-23 -7 3 2.21 0.35
-23 -7 3 1.4 0.33
23 7 -3 1.46 0.4
-23 7 3 1.69 0.26
-23 7 3 1.71 0.26
-21 -7 3 0.06 0.28
-21 -7 3 -0.07 0.27
-21 7 3 0.57 0.21
-21 7 3 0.59 0.2
21 7 -3 0.4 0.34
-19 -7 3 8 0.5
-19 -7 3 8.52 0.5
-19 7 3 10.16 0.45
19 7 -3 10.14 0.59
-19 7 3 9.82 0.45
-17 -7 3 5.13 0.41
-17 -7 3 5.33 0.37
17 7 -3 4.78 0.42
-17 7 3 4.25 0.28
-17 7 3 4.21 0.3
-15 -7 3 28.16 0.97
15 -7 -3 28.06 0.9
-15 -7 3 28.13 0.98
-15 7 3 25.87 0.86
15 7 -3 25.45 0.98
-15 7 3 25.72 0.84
13 -7 -3 38.88 1.21
-13 -7 3 37.42 1.25
-13 -7 3 39.6 1.27
-13 7 3 37.28 1.19
13 7 -3 37.69 1.32
-13 7 3 38.43 1.21
-11 -7 3 12.3 0.47
11 -7 -3 12.97 0.43
-11 -7 3 12.32 0.48
11 -7 -3 11.97 0.44
11 7 -3 7.37 0.61
-11 7 3 6.94 0.26
-11 7 3 7.19 0.27
11 7 -3 6.49 0.43
-11 7 3 7.26 0.29
9 -7 -3 37.64 1.16
-9 -7 3 36.28 1.19
9 -7 -3 36.91 1.16
-9 -7 3 36.93 1.19
-9 7 3 25.88 0.86
-9 7 3 27.22 0.84
-9 7 3 26.21 0.84
9 7 -3 26.35 0.95
9 7 -3 27.82 1.07
-7 -7 3 143.27 4.59
7 -7 -3 154.83 4.58
-7 -7 3 145.14 4.59
-7 -7 3 154.2 4.68
7 -7 -3 152.59 4.56
-7 7 3 130.43 4.04
-7 7 3 133.15 4.01
7 7 -3 129.17 4.16
7 7 -3 131.44 4.1
-7 7 3 132.91 4.03
-7 7 3 133 4.04
5 -7 -3 234.01 7.37
-5 -7 3 239.4 7.44
5 -7 -3 243.13 7.39
5 -7 -3 239.27 7.33
-5 -7 3 248.99 7.39
-5 7 3 231.13 7.11
-5 7 3 243.74 7.17
5 7 -3 217.38 7.19
5 7 -3 241.56 7.16
3 -7 -3 24.76 0.79
-3 -7 3 24.74 0.81
-3 -7 3 25.48 0.81
3 -7 -3 24.97 0.81
-3 -7 3 26.58 0.84
-3 7 3 17.33 0.65
-3 7 3 17.75 0.6
-3 7 3 17.21 0.58
3 7 -3 18.92 0.66
3 7 -3 17.76 0.67
1 -7 -3 132.44 4.09
-1 -7 3 139.56 4.12
-1 -7 3 130.36 4.11
-1 -7 3 134.9 4.12
1 -7 -3 132.03 4.08
-1 -7 3 134.94 4.09
1 7 -3 124.33 3.83
-1 7 3 120.59 3.86
1 7 -3 128.48 3.85
1 7 -3 127.87 3.8
-1 7 3 121.88 3.81
1 -7 3 126.82 3.69
1 -7 3 120.29 3.68
1 -7 3 118.79 3.67
-1 -7 -3 107.6 3.73
-1 -7 -3 123.98 3.67
-1 -7 -3 120.55 3.66
1 -7 3 121.76 3.67
1 7 3 98.26 3.2
1 7 3 102.5 3.19
-1 7 -3 103.28 3.23
-1 7 -3 107.97 3.22
1 7 3 106.53 3.25
-1 7 -3 108.2 3.18
-1 7 -3 103.15 3.2
3 -7 3 61.09 1.9
3 -7 3 59.56 1.87
3 -7 3 62.27 1.9
3 -7 3 61.46 1.9
3 -7 3 62.14 1.89
-3 -7 -3 61.41 1.88
3 7 3 47.19 1.47
-3 7 -3 45.23 1.47
3 7 3 46.01 1.46
-3 7 -3 47.99 1.43
-3 7 -3 46.47 1.45
3 7 3 46.21 1.52
5 -7 3 78.78 2.37
5 -7 3 76.65 2.37
-5 -7 -3 75.32 2.36
5 7 3 71.38 2.14
-5 7 -3 68.92 2.15
5 7 3 69.57 2.24
5 7 3 68.6 2.16
5 7 3 65.55 2.15
-5 7 -3 71.64 2.12
7 -7 3 67.93 2.1
-7 -7 -3 67.85 2.06
7 -7 3 68.47 2.1
-7 -7 -3 66.8 2.1
7 7 3 64.09 2.07
7 7 3 67.34 2.08
-7 7 -3 64.3 2.05
7 7 3 65.78 2.18
-7 7 -3 67.33 2.02
7 7 3 66.32 2.04
-7 7 -3 67.23 2.03
-9 -7 -3 22.59 0.66
9 -7 3 21.94 0.71
-9 -7 -3 22.09 0.74
9 -7 3 19.13 0.68
-9 -7 -3 20.55 0.71
9 7 3 18.33 0.69
9 7 3 18.09 0.88
9 7 3 19.47 0.64
-9 7 -3 19.26 0.64
-9 7 -3 19.21 0.61
-9 7 -3 19.76 0.62
11 -7 3 26.17 0.87
-11 -7 -3 26.84 0.83
-11 -7 -3 26.18 0.9
-11 -7 -3 26.2 0.88
11 7 3 25.84 1.16
11 7 3 28.5 0.92
-11 7 -3 28.78 0.89
11 7 3 28.18 0.98
-11 7 -3 27.37 0.96
-11 7 -3 28.32 0.9
-13 -7 -3 63.22 1.95
-13 -7 -3 63.23 2.01
-13 -7 -3 62.94 2
13 -7 3 63.5 1.99
13 7 3 46.08 1.91
-13 7 -3 51.59 1.6
-13 7 -3 51.69 1.67
-13 7 -3 52.54 1.6
13 7 3 51.39 1.62
13 7 3 53.17 1.7
-15 -7 -3 8.98 0.49
-15 -7 -3 10.04 0.46
-15 7 -3 6.66 0.42
15 7 3 7.81 0.5
15 7 3 7.3 0.34
-15 7 -3 6.82 0.39
-15 7 -3 6.89 0.3
15 7 3 6.51 0.68
-17 -7 -3 15.03 0.66
-17 -7 -3 14.81 0.62
-17 7 -3 9.27 0.49
17 7 3 8.27 0.87
17 7 3 9.46 0.39
-17 7 -3 9.54 0.41
-19 -7 -3 1.89 0.31
-19 -7 -3 1.87 0.31
-19 7 -3 1.4 0.2
19 7 3 1 0.59
-19 7 -3 1.76 0.31
-21 -7 -3 3.14 0.37
-21 -7 -3 2.55 0.36
-21 7 -3 2.42 0.24
-21 7 -3 2.13 0.33
21 7 3 2.14 0.7
-23 -7 -3 0.37 0.35
-23 -7 -3 0.74 0.37
-23 7 -3 0.24 0.36
-25 -7 -3 4.48 0.48
-25 -7 -3 3.92 0.45
-25 7 -3 3.16 0.43
-27 -7 -3 5.65 0.53
-27 -7 -3 5.25 0.52
-27 7 -3 5.01 0.52
-28 -8 3 0.65 0.41
-28 -8 3 1.7 0.43
-28 8 3 2.27 0.34
28 8 -3 1.43 0.46
-26 -8 3 3.88 0.45
-26 -8 3 4.83 0.46
-26 8 3 2.84 0.38
26 8 -3 2.99 0.46
-26 8 3 3.07 0.32
-24 -8 3 4.37 0.43
-24 -8 3 3.66 0.4
-24 8 3 3.73 0.31
24 8 -3 3.25 0.47
-24 8 3 3.5 0.31
-22 -8 3 1.5 0.34
-22 -8 3 1.66 0.33
-22 8 3 1.32 0.23
-22 8 3 1.25 0.23
22 8 -3 1.48 0.35
-20 -8 3 1.9 0.29
-20 -8 3 2.03 0.3
-20 8 3 4.23 0.32
-20 8 3 4.07 0.28
20 8 -3 3.84 0.44
-18 -8 3 -0.31 0.22
-18 -8 3 -0.05 0.24
-18 8 3 0.12 0.16
18 8 -3 0.05 0.33
-18 8 3 0.03 0.16
-16 -8 3 0.22 0.21
-16 -8 3 0.18 0.2
-16 8 3 1.18 0.16
16 8 -3 0.55 0.3
-16 8 3 1.14 0.17
-14 -8 3 15.26 0.62
-14 -8 3 15.29 0.6
14 -8 -3 16.74 0.53
-14 8 3 18.3 0.62
14 8 -3 17.91 0.78
-14 8 3 19.03 0.64
12 -8 -3 25.62 0.8
-12 -8 3 24.01 0.85
-12 -8 3 24.75 0.85
-12 8 3 28.36 0.89
12 8 -3 26.21 1.15
12 8 -3 26.63 1
-12 8 3 27.41 0.87
10 -8 -3 4.88 0.22
10 -8 -3 5.04 0.21
-10 -8 3 4.67 0.27
-10 -8 3 5.19 0.29
-10 8 3 4.06 0.18
10 8 -3 5.12 0.47
-10 8 3 4.12 0.18
-10 8 3 3.91 0.21
10 8 -3 3.68 0.33
8 -8 -3 92.2 2.79
-8 -8 3 90.21 2.81
8 -8 -3 89.85 2.78
-8 -8 3 91.81 2.82
-8 8 3 73.61 2.2
-8 8 3 75.06 2.22
8 8 -3 72.49 2.31
-8 8 3 72.56 2.2
-8 8 3 72.06 2.24
8 8 -3 65.12 2.37
6 -8 -3 50.93 1.53
-6 -8 3 46.9 1.54
-6 -8 3 47.91 1.55
-6 -8 3 52.68 1.62
6 -8 -3 47.8 1.51
6 -8 -3 49.45 1.52
6 8 -3 39.05 1.47
6 8 -3 43.01 1.43
-6 8 3 43.17 1.31
-6 8 3 43.9 1.34
-6 8 3 43.69 1.36
-6 8 3 43.81 1.32
-4 -8 3 10.69 0.42
-4 -8 3 13.08 0.47
-4 -8 3 11.16 0.41
4 -8 -3 10.99 0.38
4 -8 -3 11.81 0.4
4 8 -3 15.32 0.58
-4 8 3 14.3 0.49
-4 8 3 14.57 0.57
-4 8 3 14.21 0.5
4 8 -3 14.24 0.6
-2 -8 3 315.86 9.67
2 -8 -3 315.03 9.58
2 -8 -3 306.1 9.55
-2 -8 3 306.3 9.54
-2 -8 3 318.73 9.63
2 8 -3 257.53 8.21
-2 8 3 267.09 8.21
-2 8 3 274.43 8.15
-2 8 3 263.94 8.26
2 8 -3 266.68 8.27
0 -8 3 102.52 3.18
0 -8 -3 102.59 3.18
0 -8 3 106.44 3.2
0 -8 3 104.52 3.2
0 -8 -3 102.59 3.2
0 -8 3 107.55 3.2
0 8 3 91.26 2.96
0 8 -3 98.86 2.95
0 8 3 97.38 2.97
0 8 3 97.11 2.94
0 8 -3 97.5 2.97
0 8 3 97.93 3.02
0 8 -3 94.48 2.99
2 -8 3 41.46 1.28
2 -8 3 39.22 1.25
2 -8 3 40.6 1.28
2 -8 3 40.81 1.27
-2 -8 -3 39.4 1.25
2 -8 3 42.9 1.3
-2 8 -3 31.65 1.01
-2 8 -3 30.7 0.98
-2 8 -3 29.99 0.95
2 8 3 29.86 0.99
2 8 3 31.49 1.06
2 8 3 30.27 0.98
4 -8 3 76.43 2.35
4 -8 3 75.77 2.35
-4 -8 -3 76.27 2.34
4 8 3 61.91 2.03
-4 8 -3 65.02 2.02
4 8 3 67.45 2.01
4 8 3 66.95 2.1
4 8 3 65.04 2.02
-4 8 -3 63.64 2.03
-4 8 -3 65.31 1.99
6 -8 3 3.13 0.19
-6 -8 -3 3.25 0.2
6 -8 3 3.07 0.14
6 -8 3 3.26 0.2
6 8 3 4.8 0.24
6 8 3 4.95 0.23
6 8 3 4.62 0.29
6 8 3 4.71 0.44
6 8 3 4.75 0.28
-6 8 -3 4.96 0.26
-6 8 -3 4.89 0.18
-8 -8 -3 49.53 1.58
-8 -8 -3 51.13 1.51
8 -8 3 50.92 1.56
8 -8 3 47.38 1.53
-8 -8 -3 49.33 1.56
-8 8 -3 43.01 1.31
8 8 3 42.06 1.38
-8 8 -3 43.1 1.32
8 8 3 40.34 1.37
-8 8 -3 42.32 1.34
8 8 3 42.97 1.53
8 8 3 43.54 1.34
-10 -8 -3 22.74 0.7
10 -8 3 22.36 0.76
-10 -8 -3 22.19 0.76
-10 -8 -3 22.81 0.79
-10 8 -3 24.79 0.78
10 8 3 25.18 0.82
-10 8 -3 25.08 0.79
-10 8 -3 24.28 0.81
10 8 3 23.73 0.87
10 8 3 24.95 1.1
-12 -8 -3 8.98 0.42
-12 -8 -3 8.63 0.31
-12 -8 -3 9.69 0.44
12 -8 3 9.26 0.39
-12 8 -3 8.16 0.42
12 8 3 8.65 0.38
12 8 3 8.05 0.46
-12 8 -3 8.28 0.34
-12 8 -3 8.17 0.31
12 8 3 7.18 0.69
-14 -8 -3 23.76 0.84
14 -8 3 23.17 0.84
-14 -8 -3 23.09 0.86
-14 -8 -3 24.04 0.77
14 8 3 24.1 0.82
-14 8 -3 22.94 0.77
14 8 3 20.82 1.22
-14 8 -3 23.75 0.88
-14 8 -3 23.32 0.79
14 8 3 27.47 0.96
-16 -8 -3 12.73 0.61
-16 -8 -3 13.77 0.56
-16 8 -3 8.54 0.49
16 8 3 8.6 0.39
16 8 3 7.24 0.75
-16 8 -3 7.95 0.36
-18 -8 -3 7.53 0.5
-18 -8 -3 6.78 0.51
18 8 3 5.14 0.77
-18 8 -3 5.2 0.31
18 8 3 5.62 0.32
-18 8 -3 6.03 0.48
-20 -8 -3 7.48 0.56
-20 -8 -3 7.91 0.5
-20 8 -3 5.25 0.41
-20 8 -3 5.25 0.42
20 8 3 5.25 0.84
-22 -8 -3 0.42 0.33
-22 -8 -3 0.18 0.35
22 8 3 1.47 0.7
-22 8 -3 0.49 0.34
-24 -8 -3 2 0.4
-24 -8 -3 2.35 0.42
-24 8 -3 0.36 0.34
-26 -8 -3 6.36 0.52
-26 -8 -3 4.88 0.5
-26 8 -3 4.82 0.48
-28 -8 -3 0.7 0.43
-28 -8 -3 0.58 0.44
-28 8 -3 -0.31 0.42
-29 -9 3 2.77 0.47
-29 -9 3 3.25 0.49
29 9 -3 1.82 0.5
-29 9 3 3.22 0.36
-27 -9 3 3.37 0.46
-27 -9 3 3.11 0.46
-27 9 3 3.48 0.35
27 9 -3 3.11 0.49
-25 -9 3 5.57 0.47
-25 -9 3 5.93 0.46
-25 9 3 5.35 0.43
25 9 -3 5.17 0.53
-25 9 3 4.44 0.55
-23 -9 3 3.08 0.37
-23 -9 3 3.19 0.37
-23 9 3 3.24 0.29
-23 9 3 3.19 0.29
23 9 -3 3.66 0.47
-21 -9 3 6.5 0.45
-21 -9 3 6.14 0.52
21 9 -3 7.38 0.57
-21 9 3 6.44 0.4
-21 9 3 6.48 0.38
-19 -9 3 3.62 0.35
-19 -9 3 4.02 0.35
-19 9 3 4.75 0.33
-19 9 3 5.02 0.34
19 9 -3 5.05 0.48
-17 -9 3 6.09 0.4
-17 -9 3 6.25 0.44
-17 9 3 3.37 0.28
-17 9 3 4.11 0.27
17 9 -3 4.19 0.45
-15 -9 3 6.26 0.37
-15 -9 3 5.69 0.4
15 -9 -3 5.95 0.25
15 9 -3 8.68 0.6
-15 9 3 7.66 0.34
-15 9 3 8.67 0.36
15 9 -3 9.02 0.86
-13 -9 3 7.05 0.39
13 -9 -3 7.16 0.27
-13 -9 3 6.89 0.39
13 9 -3 8.37 0.73
-13 9 3 7.08 0.29
-13 9 3 7.36 0.32
13 9 -3 7.37 0.54
11 -9 -3 14.99 0.51
-11 -9 3 14.59 0.56
-11 -9 3 14.84 0.56
11 -9 -3 14.89 0.49
11 9 -3 14.78 0.79
11 9 -3 15.08 0.67
-11 9 3 15.93 0.53
-11 9 3 15.29 0.51
-9 -9 3 17.59 0.61
9 -9 -3 16.76 0.56
9 -9 -3 16.86 0.56
9 9 -3 18.44 0.88
-9 9 3 21.11 0.67
-9 9 3 20.34 0.64
-9 9 3 18.51 0.62
9 9 -3 18.74 0.76
-9 9 3 18.74 0.61
-7 -9 3 2.97 0.22
-7 -9 3 2.66 0.22
7 -9 -3 3.59 0.17
7 -9 -3 3.23 0.17
7 9 -3 2.66 0.28
-7 9 3 3.16 0.19
-7 9 3 2.9 0.2
-7 9 3 3.12 0.12
7 9 -3 2.28 0.33
-7 9 3 2.86 0.14
5 -9 -3 33.73 1.07
-5 -9 3 36.23 1.15
5 -9 -3 33.82 1.08
-5 -9 3 33.66 1.09
-5 9 3 29.83 1.03
-5 9 3 28.42 0.96
5 9 -3 29.67 1.03
-5 9 3 31.16 0.94
5 9 -3 28.7 1.08
-3 -9 3 14.13 0.51
-3 -9 3 14.4 0.48
-3 -9 3 13.85 0.49
3 -9 -3 13.82 0.47
3 -9 -3 14.23 0.46
-3 9 3 14.43 0.52
-3 9 3 14.23 0.5
-3 9 3 16.58 0.61
3 9 -3 14.21 0.59
3 9 -3 14.94 0.59
-1 -9 3 8.47 0.32
-1 -9 3 8.23 0.32
1 -9 -3 7.95 0.31
-1 -9 3 8.42 0.3
-1 -9 3 8.74 0.33
-1 9 3 11.69 0.37
-1 9 3 10.93 0.4
-1 9 3 11.25 0.48
1 9 -3 11.76 0.48
1 9 -3 12.11 0.46
-1 9 3 10.73 0.41
1 -9 3 46.85 1.42
-1 -9 -3 45.06 1.41
1 -9 3 47.8 1.45
1 -9 3 45.08 1.45
-1 9 -3 35.68 1.18
1 9 3 37.36 1.22
1 9 3 34.99 1.15
1 9 3 34.92 1.14
1 9 3 35.84 1.09
-1 9 -3 36.59 1.15
-1 9 -3 35.89 1.12
3 -9 3 19.38 0.63
-3 -9 -3 18.11 0.6
3 -9 3 19.67 0.64
-3 9 -3 17.94 0.57
3 9 3 17.43 0.6
3 9 3 17.79 0.58
3 9 3 17.9 0.61
-3 9 -3 17.69 0.64
3 9 3 17.89 0.69
-3 9 -3 18.17 0.6
-5 -9 -3 25.07 0.81
5 -9 3 25.73 0.79
5 -9 3 25.52 0.83
5 -9 3 25.7 0.84
5 9 3 35.23 1.05
-5 9 -3 32.98 1.03
5 9 3 32.09 1.08
-5 9 -3 32.57 1.08
-5 9 -3 33 1.07
5 9 3 33.76 1.17
5 9 3 32.52 1.07
7 -9 3 17.36 0.61
-7 -9 -3 18.7 0.6
7 -9 3 17.07 0.55
-7 -9 -3 17.59 0.63
7 -9 3 17.73 0.6
7 9 3 16.86 0.63
7 9 3 17.28 0.77
-7 9 -3 17.78 0.55
-7 9 -3 17.1 0.61
7 9 3 17 0.59
7 9 3 17.75 0.64
-9 -9 -3 40.85 1.32
9 -9 3 41.25 1.32
-9 -9 -3 41.58 1.34
-9 -9 -3 41.89 1.26
-9 9 -3 35.84 1.13
9 9 3 38.1 1.16
9 9 3 35.25 1.38
-9 9 -3 36 1.16
-9 9 -3 36.14 1.12
9 9 3 35.47 1.2
-11 -9 -3 3.42 0.15
-11 -9 -3 4.04 0.32
-11 -9 -3 4.04 0.28
11 -9 3 3.09 0.25
11 9 3 5.81 0.39
11 9 3 5.71 0.33
-11 9 -3 5.25 0.38
-11 9 -3 5.32 0.23
-11 9 -3 5.54 0.28
11 9 3 5.39 0.58
-13 -9 -3 97.57 3
-13 -9 -3 96.11 2.94
13 -9 3 94.9 2.99
-13 -9 -3 96.86 3.02
13 9 3 94.32 3.43
13 9 3 101.43 3.22
-13 9 -3 103.87 3.11
-13 9 -3 101.75 3.13
-13 9 -3 104.93 3.19
13 9 3 101.79 3.15
-15 -9 -3 6.07 0.45
-15 -9 -3 5.88 0.41
15 9 3 3.48 0.31
15 9 3 3.12 0.38
15 9 3 1.93 0.55
-15 9 -3 3.64 0.33
-15 9 -3 3.64 0.25
-17 -9 -3 6.91 0.46
-17 -9 -3 6.2 0.42
-17 9 -3 7.71 0.51
17 9 3 8.42 0.41
-17 9 -3 8.23 0.37
17 9 3 7.86 0.85
-19 -9 -3 8.73 0.58
-19 -9 -3 9.18 0.51
19 9 3 5.87 0.79
-19 9 -3 6.93 0.48
-21 -9 -3 1.87 0.35
-21 -9 -3 1.85 0.37
-21 9 -3 1.95 0.35
21 9 3 2.43 0.72
-23 -9 -3 2.44 0.38
-23 -9 -3 1.91 0.4
-23 9 -3 0.79 0.33
23 9 3 1.91 0.84
-25 -9 -3 2.96 0.43
-25 -9 -3 2.18 0.44
-25 9 -3 1.74 0.42
-27 -9 -3 1.06 0.38
-27 -9 -3 1.28 0.45
-27 9 -3 0.24 0.42
-28 -10 3 4.17 0.5
-28 -10 3 3.44 0.49
28 10 -3 3.57 0.53
-28 10 3 3.28 0.35
-26 -10 3 4.72 0.46
-26 -10 3 4.79 0.48
-26 10 3 5.76 0.48
26 10 -3 6.17 0.58
-24 -10 3 1.59 0.35
-24 -10 3 1.24 0.37
24 10 -3 1.19 0.43
-24 10 3 1.95 0.27
-22 -10 3 10.38 0.62
-22 -10 3 10.63 0.58
-22 10 3 9.17 0.48
22 10 -3 9.56 0.65
-22 10 3 9.75 0.46
-20 -10 3 23.17 0.88
-20 -10 3 22.42 0.91
20 10 -3 25.64 1.07
-20 10 3 25.32 0.87
-20 10 3 23.62 0.85
-18 -10 3 5.9 0.4
-18 -10 3 5.64 0.45
-18 10 3 6.27 0.34
-18 10 3 5.95 0.33
18 10 -3 5.99 0.52
-16 -10 3 4.2 0.33
-16 -10 3 5.12 0.34
16 10 -3 2.15 0.54
16 10 -3 2.3 0.41
-16 10 3 2.32 0.19
-16 10 3 2.54 0.19
14 -10 -3 27.37 0.82
-14 -10 3 25.15 0.91
-14 -10 3 24.75 0.91
-14 10 3 26.78 0.88
-14 10 3 26.35 0.86
14 10 -3 26.66 1.06
14 10 -3 26.59 1.22
-12 -10 3 9.84 0.45
-12 -10 3 9.79 0.43
12 -10 -3 9.82 0.34
-12 10 3 9.33 0.34
12 10 -3 8.73 0.54
12 10 -3 9.44 0.68
-12 10 3 9.81 0.37
-10 -10 3 5.06 0.3
-10 -10 3 4.39 0.31
10 -10 -3 4.74 0.2
10 10 -3 6.04 0.55
-10 10 3 7.22 0.26
10 10 -3 7.58 0.47
-10 10 3 7.36 0.3
-10 10 3 7.31 0.33
8 -10 -3 35.46 1.1
-8 -10 3 34.4 1.14
8 -10 -3 35.71 1.1
-8 -10 3 34.59 1.13
-8 10 3 33.73 1.05
8 10 -3 30.25 1.25
-8 10 3 33.89 1.02
-8 10 3 35.07 1.06
8 10 -3 32.12 1.16
-8 10 3 33.92 1.08
6 -10 -3 52.32 1.58
-6 -10 3 48.71 1.6
6 -10 -3 52.18 1.58
6 10 -3 53.04 1.71
-6 10 3 51.95 1.72
-6 10 3 53.42 1.62
-6 10 3 53.13 1.64
6 10 -3 48.95 1.77
4 -10 -3 21.55 0.7
-4 -10 3 23.19 0.76
4 -10 -3 21.78 0.7
-4 -10 3 21.04 0.71
-4 -10 3 21.25 0.72
-4 10 3 16.83 0.68
-4 10 3 17.9 0.59
-4 10 3 17.86 0.57
-4 10 3 16.82 0.6
4 10 -3 17.78 0.72
4 10 -3 18.94 0.69
2 -10 -3 61.79 1.89
-2 -10 3 59.97 1.89
-2 -10 3 61.19 1.91
2 -10 -3 60.54 1.89
-2 -10 3 62.43 1.92
-2 10 3 56.02 1.81
-2 10 3 53.9 1.73
2 10 -3 55.8 1.8
-2 10 3 56.42 1.74
-2 10 3 57.69 1.71
2 10 -3 54.38 1.79
0 -10 3 40.94 1.3
0 -10 3 41.58 1.34
0 -10 -3 42.08 1.28
0 -10 3 43.6 1.33
0 -10 3 42.65 1.33
0 -10 -3 42.16 1.34
0 10 3 42.13 1.35
0 10 3 42.04 1.36
0 10 3 43.27 1.31
0 10 -3 44.63 1.38
0 10 3 42.18 1.42
0 10 -3 43.04 1.4
2 -10 3 10.37 0.38
-2 -10 -3 10.19 0.34
2 -10 3 10.26 0.39
-2 10 -3 14.35 0.47
2 10 3 14.25 0.52
2 10 3 14.53 0.59
2 10 3 14.82 0.47
-2 10 -3 14.94 0.52
2 10 3 14.09 0.5
-2 10 -3 14.2 0.56
4 -10 3 8.26 0.28
4 -10 3 8.52 0.34
4 -10 3 8.17 0.33
-4 -10 -3 8.2 0.3
4 10 3 13.04 0.5
-4 10 -3 13.84 0.5
-4 10 -3 13.34 0.52
4 10 3 13.29 0.49
4 10 3 13.81 0.46
4 10 3 14.16 0.63
-4 10 -3 13.79 0.44
6 -10 3 65.79 2.03
6 -10 3 64.77 2.02
-6 -10 -3 63.77 2.03
-6 -10 -3 64.86 2
-6 10 -3 58.05 1.88
6 10 3 60.4 1.87
6 10 3 60.98 2
6 10 3 60.41 1.89
6 10 3 58.99 1.88
-6 10 -3 59.48 1.83
-8 -10 -3 28.23 0.95
8 -10 3 27.76 0.92
-8 -10 -3 28.38 0.91
8 -10 3 28.48 0.94
8 10 3 26.03 0.91
-8 10 -3 27.08 0.83
8 10 3 26.42 0.92
-8 10 -3 26.65 0.89
8 10 3 27 1.11
8 10 3 26.37 0.88
-10 -10 -3 6.02 0.36
10 -10 3 5.65 0.32
-10 -10 -3 6.14 0.21
-10 -10 -3 6.47 0.32
10 10 3 3.61 0.48
10 10 3 5.07 0.36
-10 10 -3 4.48 0.19
-10 10 -3 4.41 0.18
10 10 3 4.58 0.3
-10 10 -3 4.81 0.28
-12 -10 -3 133.48 4.05
12 -10 3 128.48 4.05
-12 -10 -3 134.41 4
-12 -10 -3 129.66 4.07
12 10 3 136.21 4.08
12 10 3 131.55 4.13
-12 10 -3 133.55 4.11
-12 10 -3 134.02 4.06
12 10 3 122.53 4.32
-12 10 -3 134.04 4.03
14 -10 3 26.36 0.91
-14 -10 -3 26.16 0.92
-14 -10 -3 26.68 0.96
-14 10 -3 25.02 0.92
14 10 3 22.59 1.23
-14 10 -3 26 0.86
-14 10 -3 26.09 0.82
14 10 3 25.99 0.9
14 10 3 26.24 0.99
-16 -10 -3 20.91 0.84
-16 -10 -3 22.8 0.82
-16 10 -3 23.98 0.83
16 10 3 22.53 1.34
16 10 3 23.81 0.86
-16 10 -3 26.69 0.93
-18 -10 -3 1.47 0.28
-18 -10 -3 1.97 0.33
-18 10 -3 1.5 0.2
18 10 3 1.92 0.24
-18 10 -3 1.87 0.32
18 10 3 2.15 0.64
-20 -10 -3 11.29 0.67
-20 -10 -3 12.12 0.58
-20 10 -3 10.15 0.58
20 10 3 10.79 1.19
-22 -10 -3 0.4 0.36
-22 -10 -3 0.31 0.32
22 10 3 0.29 0.77
-22 10 -3 0.25 0.31
-24 -10 -3 2.47 0.45
-24 -10 -3 3.25 0.44
24 10 3 2.2 0.84
-24 10 -3 2.08 0.41
-26 -10 -3 0.64 0.37
-26 -10 -3 1.01 0.43
-26 10 -3 0.55 0.37
-27 -11 3 5.03 0.5
-27 -11 3 5.57 0.49
-27 11 3 4.42 0.37
27 11 -3 4.37 0.53
-25 -11 3 3.2 0.44
-25 -11 3 2.64 0.42
-25 11 3 2.8 0.3
25 11 -3 2.5 0.47
-23 -11 3 1.44 0.37
-23 -11 3 2.11 0.35
23 11 -3 2.09 0.45
-23 11 3 1.55 0.25
-21 -11 3 18.43 0.84
-21 -11 3 19.38 0.82
-21 11 3 18.44 0.68
21 11 -3 18.5 0.92
-21 11 3 17.75 0.69
-19 -11 3 40.67 1.45
-19 -11 3 44.03 1.45
-19 11 3 43.5 1.4
19 11 -3 43.7 1.59
-19 11 3 42.94 1.39
-17 -11 3 23.27 0.92
-17 -11 3 25.68 0.92
17 11 -3 22.41 1
-17 11 3 21.33 0.76
-17 11 3 22.87 0.77
17 11 -3 24.19 1.31
-15 -11 3 1.73 0.26
-15 -11 3 1.51 0.26
15 11 -3 3.05 0.6
15 11 -3 3.55 0.43
-15 11 3 3.24 0.23
-15 11 3 3.66 0.25
-13 -11 3 47.13 1.53
13 -11 -3 47.29 1.44
-13 -11 3 46.26 1.52
13 11 -3 40.27 1.63
-13 11 3 42.47 1.33
-13 11 3 42.17 1.31
13 11 -3 41.57 1.46
11 -11 -3 0.46 0.08
-11 -11 3 0.36 0.17
-11 -11 3 0.19 0.17
-11 11 3 0.68 0.12
-11 11 3 0.96 0.1
11 11 -3 0.86 0.4
-11 11 3 1.12 0.16
11 11 -3 0.63 0.29
9 -11 -3 14.62 0.47
-9 -11 3 13.56 0.53
9 -11 -3 14.34 0.49
-9 -11 3 13.48 0.53
-9 11 3 8.51 0.36
-9 11 3 8.87 0.29
9 11 -3 8.56 0.5
9 11 -3 7.41 0.63
-9 11 3 8.73 0.34
-7 -11 3 67.61 2.1
7 -11 -3 67.25 2.06
7 -11 -3 66.76 2.06
-7 -11 3 66.01 2.09
7 11 -3 58.77 2.17
7 11 -3 65.58 2.11
-7 11 3 64.74 2.02
-7 11 3 66.47 1.97
-7 11 3 68.1 2.01
-5 -11 3 63.18 1.95
-5 -11 3 62.39 1.93
5 -11 -3 61.55 1.92
5 -11 -3 61.88 1.92
-5 11 3 56.32 1.85
-5 11 3 57.93 1.77
-5 11 3 56.86 1.75
5 11 -3 54.99 1.89
5 11 -3 55.98 1.84
-3 -11 3 53.88 1.66
-3 -11 3 52.78 1.68
-3 -11 3 54.88 1.71
3 -11 -3 53.56 1.66
3 -11 -3 52.96 1.66
3 11 -3 51.83 1.72
3 11 -3 52.22 1.7
-3 11 3 52.74 1.62
-3 11 3 51.47 1.71
-3 11 3 53.15 1.6
-3 11 3 50.84 1.63
-1 -11 3 5.75 0.28
-1 -11 3 5.7 0.23
1 -11 -3 5.93 0.24
-1 -11 3 5.78 0.26
1 -11 -3 5.79 0.25
-1 -11 3 6.06 0.29
1 11 -3 4.68 0.31
-1 11 3 4.27 0.25
-1 11 3 4.95 0.24
-1 11 3 4.54 0.17
-1 11 3 5.2 0.37
1 11 -3 4.54 0.37
-1 -11 -3 12.14 0.38
1 -11 3 11.78 0.43
1 -11 3 11.73 0.38
1 -11 3 11.25 0.38
1 -11 3 12.62 0.44
1 11 3 6.74 0.24
-1 11 -3 7.12 0.39
1 11 3 6.98 0.22
1 11 3 6.73 0.29
-1 11 -3 6.41 0.33
1 11 3 6.81 0.31
1 11 3 6.72 0.4
3 -11 3 26.23 0.85
3 -11 3 25.5 0.85
-3 -11 -3 25.91 0.82
-3 -11 -3 26.33 0.86
3 11 3 23.79 0.76
-3 11 -3 23.15 0.83
3 11 3 24.04 0.89
3 11 3 23.36 0.79
3 11 3 22.36 0.8
-3 11 -3 24.62 0.75
-3 11 -3 24.75 0.8
5 -11 3 27.94 0.91
5 -11 3 26.87 0.85
-5 -11 -3 27.66 0.88
5 -11 3 27.33 0.9
-5 -11 -3 28.06 0.92
-5 11 -3 25.52 0.79
5 11 3 25.15 0.82
5 11 3 24.83 0.86
-5 11 -3 26.19 0.86
-5 11 -3 24.71 0.86
5 11 3 25.26 0.85
5 11 3 26.44 0.98
5 11 3 25.39 0.86
7 -11 3 12.59 0.48
-7 -11 -3 13.45 0.47
7 -11 3 12.81 0.49
-7 -11 -3 13.48 0.52
7 11 3 11.89 0.46
-7 11 -3 11.55 0.39
7 11 3 12.06 0.51
7 11 3 11.97 0.65
7 11 3 12.18 0.5
-7 11 -3 12.26 0.48
-9 -11 -3 15.18 0.6
9 -11 3 15.56 0.56
9 -11 3 16.1 0.59
-9 -11 -3 15.18 0.55
-9 11 -3 14.53 0.54
-9 11 -3 14.65 0.46
9 11 3 14.21 0.55
9 11 3 13.98 0.59
9 11 3 13.42 0.77
-11 -11 -3 52.52 1.74
-11 -11 -3 53.55 1.71
-11 -11 -3 54.47 1.65
11 -11 3 55.76 1.73
11 11 3 47.49 1.92
-11 11 -3 53.3 1.63
11 11 3 56.17 1.76
-11 11 -3 53.54 1.68
11 11 3 53.48 1.7
-13 -11 -3 47.57 1.57
-13 -11 -3 47.65 1.54
13 -11 3 47.56 1.54
13 11 3 46.27 1.58
13 11 3 46.88 1.52
13 11 3 43.16 1.84
-13 11 -3 47.86 1.55
-13 11 -3 46.65 1.49
-13 11 -3 46.9 1.44
15 -11 3 48.24 1.6
-15 -11 -3 51.35 1.61
-15 -11 -3 48.16 1.63
-15 11 -3 48.02 1.55
15 11 3 47.6 1.58
-15 11 -3 50.81 1.63
15 11 3 49.46 1.7
15 11 3 46.21 1.97
-17 -11 -3 4.41 0.39
-17 -11 -3 7.13 0.45
17 11 3 2.33 0.64
17 11 3 4.33 0.36
-17 11 -3 3.06 0.25
-17 11 -3 2.91 0.34
-19 -11 -3 7.86 0.58
-19 -11 -3 7.24 0.52
-19 11 -3 7.06 0.53
19 11 3 5.97 0.88
-21 -11 -3 1.01 0.3
-21 -11 -3 0.18 0.37
-21 11 -3 0.94 0.34
21 11 3 1.39 0.78
-23 -11 -3 3.87 0.4
-23 -11 -3 4.2 0.48
23 11 3 3.49 0.85
-23 11 -3 3.98 0.43
-25 -11 -3 0.82 0.42
-25 -11 -3 0.86 0.38
-25 11 -3 -0.01 0.39
-27 -11 -3 0.98 0.45
-27 -11 -3 0.53 0.41
-27 11 -3 -0.8 0.41
-28 -12 3 3.04 0.47
-28 -12 3 1.67 0.42
28 12 -3 3.44 0.54
-26 -12 3 4.94 0.5
-26 -12 3 4.42 0.49
26 12 -3 4.06 0.54
-24 -12 3 1.39 0.39
-24 -12 3 0.69 0.38
24 12 -3 1.59 0.45
-24 12 3 1.21 0.25
-22 -12 3 14.24 0.68
-22 -12 3 13.42 0.72
-22 12 3 12.86 0.55
22 12 -3 13.75 0.77
-20 -12 3 10.39 0.61
-20 -12 3 10.07 0.56
-20 12 3 11.08 0.49
-20 12 3 11.51 0.48
20 12 -3 11.62 0.72
-18 -12 3 14.83 0.68
-18 -12 3 15.09 0.68
18 12 -3 13.48 0.74
18 12 -3 14.74 1.13
-18 12 3 12.53 0.51
-18 12 3 11.74 0.48
-16 -12 3 7.21 0.44
-16 -12 3 7.12 0.47
-16 12 3 5.48 0.31
16 12 -3 5.48 0.48
16 12 -3 5.47 0.72
-16 12 3 5.79 0.29
-14 -12 3 6.2 0.41
-14 -12 3 5.94 0.42
-14 12 3 9.45 0.38
-14 12 3 9.03 0.35
-14 12 3 8.53 0.4
14 12 -3 8.92 0.64
14 12 -3 8.94 0.78
-12 -12 3 37.68 1.27
-12 -12 3 39.12 1.28
-12 12 3 34 1.07
-12 12 3 33.19 1.05
12 12 -3 32.16 1.23
12 12 -3 30.04 1.35
-12 12 3 33.09 1.03
10 -12 -3 2.02 0.16
10 -12 -3 2.04 0.13
-10 -12 3 1.78 0.2
-10 -12 3 2.36 0.22
-10 12 3 1.03 0.13
-10 12 3 0.96 0.16
10 12 -3 0.41 0.28
-10 12 3 1.15 0.09
10 12 -3 0.29 0.35
-8 -12 3 39.84 1.29
8 -12 -3 39.4 1.23
-8 -12 3 39.78 1.28
8 -12 -3 40 1.25
8 12 -3 35.93 1.26
8 12 -3 32.53 1.36
-8 12 3 37.08 1.15
-8 12 3 36.41 1.16
-8 12 3 37.51 1.1
6 -12 -3 21.47 0.67
6 -12 -3 19.56 0.65
-6 -12 3 19.53 0.68
-6 12 3 21.79 0.69
-6 12 3 20.61 0.79
6 12 -3 18.32 0.86
6 12 -3 18.97 0.79
-6 12 3 20.5 0.67
-4 -12 3 43.57 1.39
4 -12 -3 44.8 1.38
4 -12 -3 44.32 1.39
-4 -12 3 44.32 1.41
-4 12 3 43.55 1.39
4 12 -3 43.25 1.47
4 12 -3 42.05 1.5
-4 12 3 45.59 1.38
-4 12 3 42.91 1.47
-4 12 3 45.06 1.36
2 -12 -3 11.66 0.41
2 -12 -3 10.59 0.39
-2 -12 3 11.2 0.46
-2 -12 3 11.5 0.44
-2 -12 3 11.09 0.39
-2 -12 3 11.65 0.42
2 12 -3 8.57 0.43
-2 12 3 6.48 0.41
-2 12 3 7.17 0.32
-2 12 3 7.12 0.25
-2 12 3 7.28 0.3
2 12 -3 7.75 0.41
0 -12 3 59.34 1.83
0 -12 3 58.96 1.83
0 -12 3 59.02 1.8
0 -12 3 56.99 1.79
0 -12 3 57.99 1.85
0 12 3 46.86 1.56
0 12 -3 51.5 1.6
0 12 -3 48.78 1.6
0 12 3 49.27 1.55
0 12 3 50.07 1.51
0 12 3 49.82 1.64
2 -12 3 50.89 1.6
2 -12 3 49.87 1.6
-2 -12 -3 49.9 1.6
-2 -12 -3 51.71 1.55
-2 12 -3 39.78 1.28
2 12 3 38.56 1.27
2 12 3 39.36 1.22
2 12 3 40.52 1.26
2 12 3 38.03 1.35
-2 12 -3 39.96 1.31
4 -12 3 41.39 1.29
-4 -12 -3 41.95 1.34
-4 -12 -3 43.18 1.3
4 -12 3 41.38 1.33
4 -12 3 41.49 1.34
4 12 3 34.36 1.22
-4 12 -3 35.13 1.13
4 12 3 34.54 1.08
4 12 3 35.78 1.13
-4 12 -3 34.35 1.06
-4 12 -3 32.83 1.13
4 12 3 32.58 1.11
-6 -12 -3 30.48 0.98
6 -12 3 29.31 0.97
-6 -12 -3 28.08 0.94
6 -12 3 29.93 0.97
-6 12 -3 30.54 0.98
6 12 3 31.95 1.19
-6 12 -3 30 1.05
6 12 3 31.89 1.04
-6 12 -3 32.35 1.06
6 12 3 33.02 1.06
6 12 3 31.64 1.06
-8 -12 -3 2.82 0.24
8 -12 3 2.65 0.21
8 -12 3 3.35 0.25
-8 -12 -3 3.38 0.23
8 12 3 1.3 0.24
8 12 3 0.77 0.2
-8 12 -3 1.11 0.09
8 12 3 0.2 0.35
-8 12 -3 0.98 0.18
8 12 3 1.1 0.18
-10 -12 -3 46.34 1.49
-10 -12 -3 45.62 1.46
10 -12 3 45.72 1.47
10 -12 3 44.94 1.46
-10 12 -3 38.46 1.22
10 12 3 37.77 1.23
-10 12 -3 37.5 1.15
10 12 3 35.22 1.46
10 12 3 37.75 1.28
-12 -12 -3 35.47 1.17
-12 -12 -3 35.3 1.09
-12 -12 -3 36.03 1.21
12 -12 3 35.13 1.17
12 12 3 31.49 1.13
12 12 3 26.98 1.32
-12 12 -3 30.81 0.95
-12 12 -3 30.33 1.07
12 12 3 30.42 1.04
-12 12 -3 30 1.01
14 -12 3 92.82 2.87
-14 -12 -3 89.72 2.89
-14 -12 -3 91.9 2.86
-14 12 -3 82.06 2.64
-14 12 -3 85.25 2.59
-14 12 -3 85.05 2.54
14 12 3 83.1 2.62
14 12 3 75.15 2.94
14 12 3 85.96 2.71
-16 -12 -3 47.06 1.53
-16 -12 -3 45.57 1.56
-16 12 -3 34.86 1.2
16 12 3 31.08 1.56
-16 12 -3 34.92 1.14
16 12 3 35.13 1.18
-18 -12 -3 2.64 0.37
-18 -12 -3 2.75 0.32
-18 12 -3 2.15 0.3
18 12 3 0.84 0.63
-18 12 -3 1.74 0.23
18 12 3 2.23 0.27
-20 -12 -3 3.74 0.43
-20 -12 -3 4.28 0.38
-20 12 -3 4.63 0.42
20 12 3 3.36 0.85
-22 -12 -3 2.66 0.43
-22 -12 -3 2.09 0.34
22 12 3 2.22 0.85
-22 12 -3 1.66 0.38
-24 -12 -3 1.43 0.36
-24 -12 -3 1.35 0.43
-24 12 -3 0.54 0.39
24 12 3 0.99 0.89
-26 -12 -3 0.4 0.43
-26 -12 -3 1.17 0.38
-26 12 -3 0.57 0.4
-27 -13 3 5.37 0.54
-27 -13 3 6.48 0.56
27 13 -3 7.9 0.67
-25 -13 3 0.95 0.41
-25 -13 3 1.62 0.42
25 13 -3 3.04 0.52
-23 -13 3 1.25 0.38
-23 -13 3 1.06 0.37
23 13 -3 1.45 0.47
-23 13 3 1.01 0.23
-21 -13 3 12.17 0.67
-21 -13 3 11.04 0.68
-21 13 3 10.53 0.48
21 13 -3 11.91 0.8
-19 -13 3 0.28 0.28
-19 -13 3 0.28 0.28
-19 13 3 0.12 0.16
19 13 -3 -0.07 0.42
-19 13 3 0.08 0.16
19 13 -3 -0.07 0.57
-17 -13 3 8.53 0.53
-17 -13 3 8.56 0.5
-17 13 3 6.28 0.32
17 13 -3 5.6 0.54
-17 13 3 5.93 0.31
17 13 -3 5.91 0.77
-15 -13 3 9.38 0.48
-15 -13 3 8.74 0.5
-15 13 3 5.5 0.29
15 13 -3 5.17 0.5
-15 13 3 4.92 0.27
-15 13 3 5.66 0.33
15 13 -3 4.4 0.67
-13 -13 3 12.78 0.56
-13 -13 3 12.35 0.56
-13 13 3 17.17 0.57
13 13 -3 14.43 1
-13 13 3 16.16 0.59
-13 13 3 15.94 0.54
13 13 -3 15.41 0.76
-11 -13 3 34.85 1.18
-11 -13 3 35.04 1.17
11 13 -3 21.03 1.1
-11 13 3 25.85 0.82
-11 13 3 25.09 0.78
11 13 -3 25.75 0.99
-11 13 3 25.35 0.84
9 -13 -3 9.03 0.35
9 -13 -3 8.84 0.3
-9 -13 3 8.9 0.4
-9 -13 3 8.41 0.42
9 13 -3 8.68 0.55
-9 13 3 9.59 0.38
9 13 -3 7.94 0.69
-9 13 3 9.48 0.36
-9 13 3 9.4 0.31
7 -13 -3 8.02 0.33
-7 -13 3 8.33 0.36
7 -13 -3 7.98 0.29
7 13 -3 5 0.55
-7 13 3 5.73 0.28
7 13 -3 5.11 0.44
-7 13 3 5.35 0.41
-7 13 3 5.54 0.26
5 -13 -3 12.13 0.42
5 -13 -3 12.05 0.44
-5 -13 3 12.31 0.45
-5 -13 3 12.42 0.49
-5 13 3 14.7 0.64
-5 13 3 14.99 0.52
5 13 -3 14.74 0.65
5 13 -3 14.88 0.71
-5 13 3 14.99 0.53
3 -13 -3 38.15 1.18
-3 -13 3 37.18 1.17
-3 -13 3 36.58 1.2
3 -13 -3 37.12 1.18
3 -13 -3 37.84 1.17
-3 -13 3 36.59 1.19
-3 13 3 32.53 1.17
-3 13 3 32.6 1.06
3 13 -3 33.74 1.17
3 13 -3 33.77 1.18
-3 13 3 33.91 1.08
-3 13 3 33.75 1.04
-1 -13 3 26.72 0.96
1 -13 -3 27.6 0.89
-1 -13 3 27.44 0.87
-1 -13 3 28.57 0.88
1 -13 -3 27.61 0.9
1 -13 -3 28.26 0.9
-1 -13 3 27.59 0.91
-1 -13 3 28.3 0.93
-1 13 3 26.05 0.97
-1 13 3 25.68 0.87
-1 13 3 25.87 0.86
1 13 -3 28.22 0.95
1 13 -3 26.06 0.94
-1 13 3 26.54 0.82
-1 -13 -3 20.06 0.63
1 -13 3 20.12 0.7
1 -13 3 19.87 0.68
-1 -13 -3 19.6 0.68
1 13 3 19.92 0.81
-1 13 -3 20.57 0.73
1 13 3 19.6 0.69
1 13 3 19.7 0.63
-1 13 -3 20.48 0.76
1 13 3 19.52 0.68
1 13 3 19.95 0.62
-3 -13 -3 34.29 1.07
3 -13 3 34.56 1.12
-3 -13 -3 33.47 1.11
3 -13 3 34.18 1.11
3 -13 3 34.2 1.06
3 13 3 23.82 0.86
-3 13 -3 25.69 0.91
3 13 3 26.01 0.86
-3 13 -3 27.46 0.89
3 13 3 26.4 0.98
3 13 3 25.2 0.82
-5 -13 -3 37.33 1.2
5 -13 3 36.06 1.2
5 -13 3 37.71 1.2
-5 -13 -3 36.76 1.16
5 13 3 30.88 0.98
5 13 3 30.23 1.03
5 13 3 29.39 1.03
-5 13 -3 31.42 1.05
5 13 3 30.16 1.15
5 13 3 31.07 1.02
-5 13 -3 31.08 0.96
-5 13 -3 31.36 1.04
-7 -13 -3 3.15 0.21
-7 -13 -3 2.56 0.23
7 -13 3 2.78 0.23
7 -13 3 3.04 0.24
-7 13 -3 3.5 0.14
7 13 3 3.45 0.42
-7 13 -3 2.43 0.25
7 13 3 3.63 0.28
7 13 3 4.49 0.36
7 13 3 3.72 0.29
-7 13 -3 3.5 0.31
9 -13 3 6.81 0.35
9 -13 3 7.06 0.36
-9 -13 -3 6.85 0.33
-9 -13 -3 7.8 0.42
9 13 3 5.06 0.34
-9 13 -3 4.65 0.18
9 13 3 4.92 0.53
-9 13 -3 4.72 0.33
9 13 3 5.66 0.44
-11 -13 -3 27.27 0.91
11 -13 3 26.32 0.92
11 -13 3 27.75 0.93
-11 -13 -3 26.07 0.96
-11 13 -3 22.05 0.79
11 13 3 22.56 0.9
11 13 3 21.72 0.81
11 13 3 19.88 1.07
-11 13 -3 22.22 0.68
-13 -13 -3 48.89 1.71
13 -13 3 54.83 1.7
-13 -13 -3 53.08 1.68
13 13 3 40.84 1.79
13 13 3 46.68 1.51
-13 13 -3 45.81 1.48
13 13 3 48.16 1.6
-13 13 -3 44.53 1.52
15 -13 3 20.7 0.79
-15 -13 -3 20.55 0.78
-15 -13 -3 21.19 0.84
15 13 3 15.14 0.65
-15 13 -3 14.27 0.64
15 13 3 12.71 1.12
-15 13 -3 14.78 0.58
-17 -13 -3 3.03 0.31
-17 -13 -3 2.66 0.37
17 13 3 1.26 0.62
-17 13 -3 1.85 0.24
17 13 3 1.85 0.28
-17 13 -3 2.21 0.34
-19 -13 -3 2.87 0.33
-19 -13 -3 3.45 0.42
-19 13 -3 3.85 0.39
19 13 3 4.04 0.84
-21 -13 -3 2.51 0.33
-21 -13 -3 2.27 0.42
21 13 3 1.94 0.76
-21 13 -3 1.97 0.37
-23 -13 -3 2.2 0.39
-23 -13 -3 1.4 0.42
23 13 3 0.27 0.84
-23 13 -3 0.55 0.35
-25 -13 -3 1 0.44
-25 -13 -3 1.45 0.42
25 13 3 1.83 0.96
-25 13 -3 0.72 0.4
-26 -14 3 4.75 0.52
-26 -14 3 4.46 0.52
26 14 -3 7.07 0.65
-24 -14 3 -0.09 0.39
-24 -14 3 -0.09 0.38
24 14 -3 0.89 0.48
-22 -14 3 0.37 0.33
-22 -14 3 0.73 0.35
22 14 -3 1.35 0.48
-20 -14 3 2.61 0.37
-20 -14 3 3.35 0.39
20 14 -3 2.15 0.48
-20 14 3 2 0.21
20 14 -3 1.35 0.67
-18 -14 3 2.1 0.32
-18 -14 3 2.08 0.33
-18 14 3 0.76 0.2
18 14 -3 1.07 0.44
-18 14 3 0.71 0.17
-18 14 3 0.79 0.16
18 14 -3 0.44 0.56
-16 -14 3 13.82 0.64
-16 -14 3 13.28 0.64
-16 14 3 9.35 0.42
16 14 -3 9.26 0.88
-16 14 3 9.13 0.37
16 14 -3 8.48 0.63
-16 14 3 8.69 0.39
-14 -14 3 12.03 0.56
-14 -14 3 11.22 0.54
-14 14 3 7.21 0.32
-14 14 3 7.05 0.29
-14 14 3 6.61 0.35
14 14 -3 5.52 0.66
14 14 -3 6.43 0.57
-12 -14 3 20.81 0.77
-12 -14 3 20.81 0.77
-12 14 3 20.76 0.67
12 14 -3 20.3 0.89
-12 14 3 21.91 0.7
12 14 -3 17.3 1.03
-12 14 3 21.44 0.72
-10 -14 3 26.22 0.9
-10 -14 3 25.92 0.91
10 -14 -3 25.61 0.86
10 14 -3 15.25 0.96
-10 14 3 18.23 0.63
-10 14 3 18.75 0.62
10 14 -3 18.15 0.84
-10 14 3 18.45 0.57
8 -14 -3 11.41 0.38
8 -14 -3 11.13 0.43
8 -14 -3 11.08 0.38
-8 -14 3 11.41 0.47
-8 14 3 14.28 0.54
-8 14 3 15.39 0.47
-8 14 3 15.85 0.53
8 14 -3 14.55 0.84
-8 14 3 13.64 0.68
8 14 -3 16.52 0.71
-6 -14 3 12.11 0.47
6 -14 -3 13 0.43
6 -14 -3 12.12 0.45
-6 -14 3 12.67 0.51
6 -14 -3 11.97 0.42
6 14 -3 11.71 0.59
6 14 -3 11.04 0.67
-6 14 3 12.37 0.43
-6 14 3 11.35 0.44
-6 14 3 11.38 0.58
4 -14 -3 8.44 0.34
-4 -14 3 8.36 0.38
4 -14 -3 8.52 0.34
-4 -14 3 8.19 0.34
-4 -14 3 8.33 0.37
4 -14 -3 8.75 0.32
4 14 -3 9.46 0.57
-4 14 3 9.92 0.39
-4 14 3 9.44 0.37
-4 14 3 9.82 0.52
4 14 -3 10.02 0.53
-2 -14 3 49.82 1.58
2 -14 -3 49.85 1.55
2 -14 -3 50.15 1.55
-2 -14 3 48.65 1.56
-2 -14 3 49.45 1.53
-2 -14 3 48.48 1.54
2 -14 -3 48.49 1.54
-2 14 3 53.14 1.62
2 14 -3 49.7 1.73
-2 14 3 53.28 1.65
2 14 -3 54.39 1.75
-2 14 3 53.51 1.76
-2 14 3 51.82 1.66
0 -14 3 16.62 0.58
0 -14 3 16.51 0.57
0 -14 3 14.53 0.5
0 -14 -3 16.07 0.57
0 -14 3 16.05 0.5
0 -14 -3 16.72 0.57
0 14 3 21.19 0.73
0 14 3 22.23 0.68
0 14 3 21.44 0.67
0 14 -3 21.78 0.83
0 14 -3 22.44 0.8
0 14 3 21.14 0.74
0 14 3 21.11 0.85
2 -14 3 10.89 0.44
-2 -14 -3 10.1 0.42
-2 -14 -3 9.76 0.35
2 -14 3 10.19 0.41
2 14 3 10.41 0.46
-2 14 -3 11.04 0.53
2 14 3 10.84 0.37
2 14 3 10.85 0.43
2 14 3 11.37 0.57
-2 14 -3 11.3 0.49
4 -14 3 28.72 0.88
4 -14 3 27.59 0.87
-4 -14 -3 28.31 0.95
4 -14 3 27.78 0.94
-4 -14 -3 29.02 0.9
4 -14 3 28.7 0.96
-4 14 -3 24.73 0.89
4 14 3 26.58 0.89
4 14 3 24.79 0.87
-4 14 -3 26.47 0.9
4 14 3 25.91 1
4 14 3 24.76 0.87
4 14 3 25.47 0.82
6 -14 3 11.76 0.5
-6 -14 -3 12.34 0.49
6 -14 3 11.43 0.46
-6 -14 -3 11.76 0.43
-6 14 -3 12.86 0.41
-6 14 -3 12.49 0.54
6 14 3 12.4 0.52
6 14 3 12.62 0.53
-6 14 -3 13.02 0.54
6 14 3 12.18 0.55
6 14 3 12.3 0.69
-8 -14 -3 16.96 0.67
8 -14 3 17.02 0.62
8 -14 3 16.77 0.65
-8 -14 -3 17.28 0.6
8 14 3 14.73 0.66
-8 14 -3 14.92 0.62
-8 14 -3 15.16 0.61
8 14 3 15.66 0.83
-8 14 -3 14.97 0.48
8 14 3 15.32 0.6
10 -14 3 19.24 0.71
-10 -14 -3 19.42 0.74
-10 -14 -3 19.42 0.68
10 -14 3 18.71 0.69
10 14 3 15.8 0.92
10 14 3 16.51 0.7
-10 14 -3 15.49 0.51
10 14 3 17.02 0.64
-10 14 -3 15.48 0.63
-12 -14 -3 37.64 1.21
-12 -14 -3 36.78 1.26
12 -14 3 36.01 1.22
12 14 3 31.75 1.45
12 14 3 34.81 1.26
-12 14 -3 32.37 1.18
-12 14 -3 33.49 1.13
12 14 3 35.09 1.16
-14 -14 -3 5.8 0.38
-14 -14 -3 4.16 0.36
14 -14 3 5.13 0.39
14 14 3 2.46 0.41
-14 14 -3 3.46 0.28
-14 14 -3 2.7 0.3
14 14 3 2.09 0.61
14 14 3 2.82 0.33
-16 -14 -3 0.89 0.32
-16 -14 -3 0.67 0.25
-16 14 -3 1.11 0.24
16 14 3 0.35 0.65
16 14 3 1.39 0.29
-16 14 -3 0.92 0.3
-18 -14 -3 2 0.38
-18 -14 -3 3.22 0.33
18 14 3 2.8 0.78
18 14 3 3.43 0.34
-18 14 -3 3.25 0.29
-18 14 -3 3.53 0.35
-20 -14 -3 0.88 0.33
-20 -14 -3 1.2 0.38
-20 14 -3 1.7 0.35
20 14 3 1.43 0.73
-22 -14 -3 0.66 0.34
-22 -14 -3 0.81 0.42
22 14 3 -0.03 0.72
-22 14 -3 -0.3 0.33
-24 -14 -3 1.12 0.44
-24 -14 -3 0.66 0.38
-24 14 -3 0.23 0.36
24 14 3 0.52 0.81
-26 -14 -3 0.82 0.45
-26 -14 -3 0.35 0.38
-26 14 -3 0.33 0.41
26 14 3 0.78 0.98
-25 -15 3 0.29 0.41
-25 -15 3 -0.21 0.41
25 15 -3 0.78 0.5
-23 -15 3 1.24 0.41
-23 -15 3 1.75 0.39
-23 15 3 1.37 0.26
23 15 -3 2.1 0.51
-21 -15 3 0.99 0.35
-21 -15 3 0.5 0.36
-21 15 3 0.29 0.22
21 15 -3 0.42 0.66
21 15 -3 -0.15 0.45
-19 -15 3 9.79 0.61
-19 -15 3 9.91 0.62
-19 15 3 8.14 0.41
19 15 -3 7.45 0.85
19 15 -3 7.87 0.64
-19 15 3 6.38 0.38
-17 -15 3 1.73 0.31
-17 -15 3 2.3 0.34
17 15 -3 0.94 0.63
-17 15 3 0.93 0.17
-17 15 3 0.82 0.16
17 15 -3 1.23 0.43
-17 15 3 0.71 0.19
-15 -15 3 11.56 0.58
-15 -15 3 10.86 0.57
-15 15 3 11.19 0.45
-15 15 3 10.51 0.4
15 15 -3 8.56 0.87
-15 15 3 10.97 0.43
15 15 -3 9.6 0.67
-13 -15 3 6.23 0.44
-13 -15 3 5.62 0.42
-13 15 3 5.02 0.27
-13 15 3 4.73 0.3
-13 15 3 5.15 0.23
13 15 -3 3.92 0.58
13 15 -3 5.35 0.47
-11 -15 3 13.16 0.56
11 -15 -3 12.96 0.49
-11 -15 3 12.79 0.55
11 15 -3 11.61 0.68
11 15 -3 11.44 0.82
-11 15 3 13.49 0.49
-11 15 3 13.18 0.48
-11 15 3 12.96 0.43
-9 -15 3 13.08 0.55
-9 -15 3 13.03 0.55
9 -15 -3 14.07 0.5
-9 15 3 7.72 0.28
9 15 -3 7.73 0.75
9 15 -3 9.42 0.64
-9 15 3 9.2 0.38
-9 15 3 9.24 0.35
-9 15 3 9.32 0.55
-7 -15 3 69.68 2.17
7 -15 -3 68.4 2.12
7 -15 -3 68.61 2.16
-7 -15 3 71.45 2.2
7 -15 -3 68.84 2.13
7 15 -3 76.23 2.38
-7 15 3 74.11 2.27
-7 15 3 72.51 2.4
7 15 -3 68.21 2.47
-7 15 3 72.76 2.26
5 -15 -3 46.53 1.47
5 -15 -3 47.12 1.44
-5 -15 3 45.61 1.5
5 -15 -3 46.17 1.44
-5 -15 3 46.1 1.46
5 15 -3 39.66 1.4
-5 15 3 39.36 1.28
-5 15 3 41.43 1.42
-5 15 3 41.39 1.3
5 15 -3 40.21 1.46
-3 -15 3 49.56 1.56
-3 -15 3 50.73 1.6
3 -15 -3 49.37 1.56
3 -15 -3 49.56 1.56
3 -15 -3 49.41 1.58
-3 -15 3 51.07 1.57
-3 -15 3 50 1.58
-3 15 3 49.97 1.69
3 15 -3 51.36 1.7
-3 15 3 49.45 1.57
3 15 -3 47.54 1.66
-3 15 3 50.77 1.58
-1 -15 3 53.91 1.62
-1 -15 3 52.17 1.67
-1 -15 3 51.67 1.62
-1 -15 3 53.35 1.67
1 -15 -3 52.36 1.65
1 -15 -3 52.5 1.66
1 -15 -3 52.08 1.64
1 15 -3 53.16 1.84
-1 15 3 55.9 1.77
1 15 -3 56.99 1.85
-1 15 3 57.49 1.78
-1 15 3 57.11 1.73
-1 15 3 57.15 1.89
1 -15 3 17.85 0.65
1 -15 3 18.2 0.66
-1 -15 -3 19.22 0.65
1 15 3 23.95 0.81
1 15 3 24.95 0.96
1 15 3 23.73 0.82
1 15 3 23.18 0.75
-1 15 -3 23 0.88
-1 15 -3 25.05 0.87
3 -15 3 5.93 0.33
-3 -15 -3 6.09 0.34
3 -15 3 5.71 0.33
3 -15 3 5.58 0.22
-3 -15 -3 5.95 0.24
-3 15 -3 2.69 0.25
3 15 3 2.33 0.23
3 15 3 2.36 0.16
-3 15 -3 3.2 0.31
3 15 3 2.28 0.35
3 15 3 2.25 0.21
5 -15 3 53.79 1.72
5 -15 3 54.23 1.71
-5 -15 -3 52.84 1.72
-5 -15 -3 53.87 1.67
-5 15 -3 54.46 1.8
5 15 3 58.13 1.78
5 15 3 56.21 1.92
-5 15 -3 57.39 1.8
5 15 3 55.08 1.78
5 15 3 52.36 1.79
-7 -15 -3 17.17 0.59
7 -15 3 16.87 0.62
-7 -15 -3 16.47 0.65
7 -15 3 17.18 0.65
7 15 3 17.53 0.71
-7 15 -3 18.06 0.72
7 15 3 18.69 0.71
7 15 3 18.16 0.69
7 15 3 18.67 0.89
-7 15 -3 18.49 0.58
-7 15 -3 17.84 0.71
-9 -15 -3 14.02 0.54
-9 -15 -3 15.24 0.62
9 -15 3 15.05 0.58
9 -15 3 14.97 0.6
-9 15 -3 13.22 0.61
9 15 3 14.24 0.6
9 15 3 15.14 0.69
-9 15 -3 14.62 0.61
9 15 3 15.28 0.88
11 -15 3 13.35 0.56
-11 -15 -3 12.47 0.59
-11 -15 -3 12.45 0.51
11 -15 3 12.25 0.53
11 15 3 13.02 0.99
11 15 3 15.31 0.73
-11 15 -3 12.56 0.58
11 15 3 13.87 0.61
-13 -15 -3 11.07 0.5
-13 -15 -3 11.18 0.59
13 -15 3 10.67 0.51
-13 15 -3 13.03 0.57
-13 15 -3 11.81 0.58
13 15 3 12.68 0.6
13 15 3 10.57 0.94
13 15 3 12.14 0.7
-15 -15 -3 2.5 0.28
-15 -15 -3 1.54 0.32
15 -15 3 1.86 0.29
15 15 3 3.39 0.34
15 15 3 2.66 0.73
-15 15 -3 3 0.34
-15 15 -3 3.5 0.31
-17 -15 -3 0.12 0.25
-17 -15 -3 0.66 0.34
-17 15 -3 0.56 0.24
17 15 3 1.24 0.29
-17 15 -3 0.95 0.32
17 15 3 -0.14 0.69
-19 -15 -3 1.57 0.32
-19 -15 -3 1.53 0.39
-19 15 -3 2.39 0.36
19 15 3 1.83 0.72
-21 -15 -3 1.58 0.34
-21 -15 -3 2.5 0.44
-21 15 -3 1.74 0.37
21 15 3 2.31 0.88
-23 -15 -3 3.44 0.43
-23 -15 -3 2.78 0.47
23 15 3 2.69 0.94
-23 15 -3 2.36 0.42
-25 -15 -3 1.15 0.47
-25 -15 -3 1.33 0.4
25 15 3 1.83 0.89
-25 15 -3 0.92 0.41
-26 -16 3 0.05 0.41
-26 -16 3 -0.1 0.42
-26 16 3 0.12 0.38
26 16 -3 0.63 0.51
-24 -16 3 2.86 0.44
-24 -16 3 3.5 0.48
-24 16 3 2.02 0.28
24 16 -3 2.82 0.55
-22 -16 3 5.3 0.49
-22 -16 3 5.29 0.48
-22 16 3 4.29 0.38
22 16 -3 5.08 0.6
-20 -16 3 2.86 0.41
-20 -16 3 2.46 0.37
20 16 -3 2.1 0.52
-20 16 3 2.61 0.26
20 16 -3 1.84 0.75
-18 -16 3 10.24 0.61
-18 -16 3 10.66 0.63
18 16 -3 9.6 0.79
-18 16 3 10.25 0.46
18 16 -3 9.06 0.95
-16 -16 3 6.08 0.45
-16 -16 3 5.57 0.41
-16 16 3 4.82 0.3
-16 16 3 5.17 0.33
-16 16 3 4.71 0.28
16 16 -3 4.84 0.7
16 16 -3 5.43 0.55
-14 -16 3 13.99 0.64
-14 -16 3 13.37 0.63
-14 16 3 15.27 0.54
-14 16 3 15.26 0.56
14 16 -3 12.75 0.95
-14 16 3 14.44 0.5
14 16 -3 13.96 0.77
-12 -16 3 6.44 0.42
-12 -16 3 7.08 0.43
12 -16 -3 6.97 0.37
-12 16 3 6.82 0.34
12 16 -3 5.31 0.67
-12 16 3 6.92 0.27
12 16 -3 6.64 0.58
-12 16 3 7.02 0.32
-10 -16 3 18.33 0.68
10 -16 -3 17.5 0.64
-10 -16 3 17.51 0.69
-10 16 3 19.42 0.67
-10 16 3 18.94 0.6
10 16 -3 17.63 1.05
-10 16 3 19.54 0.85
-10 16 3 20.28 0.66
10 16 -3 18.58 0.86
-8 -16 3 6.56 0.37
8 -16 -3 6.97 0.34
-8 16 3 5.72 0.49
8 16 -3 6.4 0.61
-8 16 3 5.84 0.29
8 16 -3 7.4 0.55
-8 16 3 5.87 0.31
6 -16 -3 77.16 2.34
6 -16 -3 76.67 2.34
6 -16 -3 75.77 2.38
-6 -16 3 75.27 2.37
-6 -16 3 76.68 2.41
-6 16 3 79.46 2.57
6 16 -3 77.86 2.54
-6 16 3 78.79 2.41
6 16 -3 74.77 2.61
-6 16 3 78.52 2.42
-4 -16 3 63.92 2.01
4 -16 -3 64.15 2
-4 -16 3 65.27 2.03
4 -16 -3 64.72 2
-4 -16 3 66.61 2.02
4 -16 -3 65.31 2.03
-4 -16 3 63.08 2.05
-4 16 3 60.98 1.88
4 16 -3 59.99 2.04
-4 16 3 61.42 1.9
-4 16 3 60.29 2.02
4 16 -3 58.77 1.99
2 -16 -3 42.82 1.34
-2 -16 3 42.66 1.33
2 -16 -3 41.87 1.36
-2 -16 3 42.67 1.33
-2 -16 3 41.82 1.39
-2 -16 3 42.72 1.37
2 -16 -3 43.33 1.35
-2 16 3 34.24 1.08
-2 16 3 33.33 1.02
-2 16 3 32.31 1.2
2 16 -3 32.32 1.19
2 16 -3 31.33 1.16
-2 16 3 32.44 1.06
0 -16 -3 53.86 1.7
0 -16 3 54.97 1.72
0 -16 -3 55.01 1.71
0 -16 3 52.06 1.72
0 16 3 55.48 1.69
0 16 3 56.94 1.88
0 16 -3 53.43 1.81
0 16 3 54.38 1.68
0 16 3 53.67 1.75
0 16 -3 56.8 1.82
0 16 3 54.46 1.73
2 -16 3 3.57 0.28
-2 -16 -3 3.56 0.29
2 -16 3 3.31 0.25
2 16 3 5.72 0.36
2 16 3 6.03 0.33
2 16 3 5.16 0.54
-2 16 -3 6.08 0.42
2 16 3 5.9 0.23
-2 16 -3 6.51 0.39
4 -16 3 16.54 0.63
-4 -16 -3 17.17 0.56
-4 -16 -3 15.88 0.63
4 -16 3 16.9 0.62
4 16 3 16.02 0.64
4 16 3 16.78 0.79
4 16 3 15.66 0.62
4 16 3 15.4 0.54
-4 16 -3 16.73 0.65
4 16 3 15.79 0.64
-4 16 -3 15.16 0.67
-6 -16 -3 9.48 0.37
6 -16 3 9.12 0.41
-6 -16 -3 9.13 0.46
6 -16 3 9.3 0.44
6 16 3 12.18 0.55
6 16 3 12.38 0.73
-6 16 -3 12.54 0.55
-6 16 -3 11.9 0.54
6 16 3 11.9 0.57
6 16 3 11.99 0.52
8 -16 3 17.97 0.69
-8 -16 -3 18.57 0.71
-8 -16 -3 18.12 0.64
8 -16 3 18.24 0.67
-8 16 -3 20.04 0.79
-8 16 -3 20.34 0.8
8 16 3 20.86 0.79
8 16 3 21.75 1.07
8 16 3 20.75 0.84
-10 -16 -3 15.86 0.6
-10 -16 -3 16.49 0.68
10 -16 3 15.97 0.65
10 -16 3 16.36 0.64
-10 16 -3 17.92 0.73
10 16 3 18.02 0.72
10 16 3 17.57 0.99
10 16 3 17.41 0.81
-10 16 -3 17.5 0.71
12 -16 3 3.89 0.31
-12 -16 -3 3.69 0.27
-12 -16 -3 4.18 0.35
12 -16 3 3.87 0.32
12 16 3 4.37 0.37
-12 16 -3 5.79 0.4
12 16 3 5.2 0.48
12 16 3 3.69 0.63
14 -16 3 4.67 0.36
-14 -16 -3 3.8 0.3
-14 -16 -3 3.82 0.38
-14 16 -3 5.03 0.43
14 16 3 3.64 0.75
14 16 3 5.16 0.42
-14 16 -3 4.9 0.39
14 16 3 4.44 0.54
-16 -16 -3 1.36 0.26
-16 -16 -3 0.92 0.35
16 16 3 0.39 0.64
-16 16 -3 1.3 0.31
-16 16 -3 0.92 0.26
16 16 3 0.93 0.3
-18 -16 -3 2.52 0.33
-18 -16 -3 1.24 0.37
18 16 3 1.92 0.33
18 16 3 0.92 0.67
-18 16 -3 1.87 0.29
-18 16 -3 1.24 0.34
-20 -16 -3 2.72 0.43
-20 -16 -3 2.48 0.34
-20 16 -3 1.61 0.37
20 16 3 1.74 0.75
-22 -16 -3 4.32 0.43
-22 -16 -3 3.9 0.5
22 16 3 2.12 0.84
-22 16 -3 2.56 0.41
-24 -16 -3 0.8 0.44
-24 -16 -3 0.89 0.38
-24 16 -3 0.05 0.37
24 16 3 1.37 0.86
-25 -17 3 0.72 0.42
-25 -17 3 0.6 0.44
25 17 -3 1.14 0.46
-23 -17 3 5.78 0.5
-23 -17 3 6.64 0.54
23 17 -3 6.05 0.6
-23 17 3 4.99 0.4
-21 -17 3 3.93 0.43
-21 -17 3 3.84 0.43
-21 17 3 4.41 0.36
21 17 -3 4.03 0.81
21 17 -3 4.19 0.55
-19 -17 3 1.85 0.37
-19 -17 3 1.64 0.34
-19 17 3 1.42 0.22
19 17 -3 1.75 0.73
19 17 -3 1.83 0.46
-17 -17 3 13.99 0.67
-17 -17 3 14.35 0.71
-17 17 3 13.68 0.54
17 17 -3 11.67 1.14
17 17 -3 13.14 0.78
-15 -17 3 4.5 0.37
-15 -17 3 5.16 0.37
-15 17 3 4.99 0.32
-15 17 3 4.75 0.29
15 17 -3 4.18 0.72
15 17 -3 4.67 0.5
-13 -17 3 10.71 0.55
-13 -17 3 11.17 0.54
13 17 -3 11.14 1
-13 17 3 13.92 0.52
-13 17 3 12.66 0.73
13 17 -3 12.49 0.75
-13 17 3 14.27 0.5
-11 -17 3 8.45 0.49
-11 -17 3 8.36 0.46
11 -17 -3 8.93 0.4
-11 17 3 8.71 0.31
11 17 -3 6.77 0.72
-11 17 3 8.25 0.37
11 17 -3 6.49 0.6
-11 17 3 8.52 0.36
-11 17 3 7.84 0.58
-9 -17 3 43.89 1.44
9 -17 -3 44.96 1.43
-9 17 3 44.43 1.37
-9 17 3 44.46 1.54
9 17 -3 38.67 1.63
-9 17 3 44.05 1.36
9 17 -3 41.69 1.52
7 -17 -3 14.92 0.56
-7 -17 3 14.65 0.56
-7 -17 3 14.81 0.61
-7 17 3 15.95 0.57
7 17 -3 14.58 0.88
7 17 -3 14.78 0.75
-7 17 3 15.87 0.78
-7 17 3 15.52 0.55
5 -17 -3 64.38 2.02
-5 -17 3 64.71 2.03
-5 -17 3 65.82 2.01
5 -17 -3 63.56 1.98
-5 -17 3 63.59 2.05
5 -17 -3 63.59 1.98
-5 17 3 59.73 1.9
5 17 -3 60.2 2.01
5 17 -3 60.85 2.09
-5 17 3 61.08 2.04
-5 17 3 59.48 1.88
3 -17 -3 80.23 2.49
-3 -17 3 80.3 2.48
-3 -17 3 79.92 2.52
3 -17 -3 78.73 2.51
3 -17 -3 79.38 2.48
-3 -17 3 81.93 2.55
-3 -17 3 83.95 2.49
-3 17 3 63.69 1.96
3 17 -3 62.03 2.07
-3 17 3 62.93 1.97
-3 17 3 62.01 2.1
3 17 -3 62.26 2.1
-1 -17 3 24.01 0.82
1 -17 -3 27.36 0.88
-1 -17 3 27.1 0.91
-1 -17 3 26.78 0.82
1 -17 -3 26.94 0.9
-1 -17 3 26.63 0.92
1 -17 -3 27.14 0.86
1 17 -3 27.71 1.03
-1 17 3 25.87 0.83
-1 17 3 26.99 0.84
-1 17 3 26.85 0.91
1 17 -3 27.39 1.03
-1 17 3 27.54 1.06
-1 17 3 26.15 0.9
1 -17 3 0.95 0.21
-1 -17 -3 1 0.18
-1 -17 -3 0.85 0.18
1 -17 3 0.74 0.18
1 17 3 0.07 0.2
1 17 3 0.09 0.16
1 17 3 -0.34 0.32
-1 17 -3 -0.13 0.24
1 17 3 -0.14 0.07
-1 17 -3 0.17 0.26
-3 -17 -3 36.28 1.19
3 -17 3 35.11 1.19
3 -17 3 36.29 1.19
3 -17 3 35.81 1.11
-3 -17 -3 36.01 1.13
3 17 3 30.15 1.03
3 17 3 30.55 1.05
-3 17 -3 31.65 1.09
3 17 3 31.07 1.19
3 17 3 29.91 1.04
-3 17 -3 29.86 1.08
3 17 3 29.37 0.96
5 -17 3 0.07 0.18
5 -17 3 -0.03 0.2
-5 -17 -3 0.17 0.12
-5 -17 -3 -0.06 0.2
-5 17 -3 0.65 0.28
5 17 3 0.69 0.26
5 17 3 0.88 0.25
5 17 3 0.76 0.41
-5 17 -3 0.55 0.22
5 17 3 0.69 0.22
-7 -17 -3 2.02 0.26
7 -17 3 2.99 0.29
-7 -17 -3 2.42 0.19
7 -17 3 2.19 0.24
7 17 3 4.47 0.52
-7 17 -3 3.8 0.38
7 17 3 3.93 0.33
-7 17 -3 4.57 0.42
7 17 3 4.27 0.37
7 17 3 3.45 0.3
-9 -17 -3 2.47 0.22
9 -17 3 2.28 0.28
-9 -17 -3 2.43 0.29
9 -17 3 2.45 0.27
-9 17 -3 3.84 0.39
9 17 3 4.8 0.63
9 17 3 4.29 0.4
-9 17 -3 3.64 0.34
9 17 3 4.57 0.41
-11 -17 -3 3.22 0.25
11 -17 3 3.96 0.33
-11 -17 -3 2.97 0.32
11 -17 3 4.11 0.33
-11 17 -3 1.56 0.29
11 17 3 1.66 0.39
-11 17 -3 1.49 0.28
11 17 3 1.6 0.31
11 17 3 1.5 0.55
13 -17 3 7.99 0.5
-13 -17 -3 6.68 0.46
-13 -17 -3 6.61 0.43
13 17 3 4.75 0.71
13 17 3 5.53 0.51
-13 17 -3 6.88 0.45
-13 17 -3 6.08 0.43
-13 17 -3 6.44 0.51
13 17 3 6.49 0.55
-15 -17 -3 1.93 0.28
15 -17 3 2.05 0.32
-15 -17 -3 2.37 0.37
-15 17 -3 1.38 0.31
15 17 3 1.17 0.65
15 17 3 1.16 0.35
-15 17 -3 1.57 0.28
-17 -17 -3 6.5 0.49
-17 -17 -3 6.5 0.48
17 17 3 4.59 0.42
-17 17 -3 4.54 0.37
-17 17 -3 5.15 0.43
17 17 3 2.93 0.75
-19 -17 -3 1.42 0.41
-19 -17 -3 1.7 0.32
19 17 3 0.78 0.72
-19 17 -3 1.81 0.37
-21 -17 -3 4.51 0.51
-21 -17 -3 4.33 0.43
-21 17 -3 1.87 0.37
21 17 3 2.99 0.85
-23 -17 -3 1.68 0.39
-23 -17 -3 1.34 0.45
23 17 3 1.22 0.83
-23 17 -3 0.45 0.4
-24 -18 3 2.99 0.48
-24 -18 3 2.37 0.46
24 18 -3 3.23 0.58
-22 -18 3 3.79 0.44
-22 -18 3 2.93 0.46
-22 18 3 3.58 0.29
22 18 -3 3.6 0.85
22 18 -3 3.86 0.6
-20 -18 3 1.45 0.37
-20 -18 3 1.2 0.36
20 18 -3 3 0.56
20 18 -3 3.25 0.76
-20 18 3 2.56 0.25
-18 -18 3 2.61 0.37
-18 -18 3 3.04 0.38
-18 18 3 1.61 0.21
18 18 -3 1.59 0.49
18 18 -3 1.8 0.73
-16 -18 3 13.88 0.68
-16 -18 3 15 0.71
16 18 -3 9.97 0.98
-16 18 3 11.38 0.48
16 18 -3 12.27 0.84
-14 -18 3 9.33 0.53
-14 -18 3 10.05 0.55
-14 18 3 7.19 0.35
14 18 -3 5.8 0.71
-14 18 3 6.32 0.46
-14 18 3 6.01 0.61
14 18 -3 7.42 0.61
12 -18 -3 5.06 0.36
-12 -18 3 4.86 0.38
-12 -18 3 4.96 0.41
12 18 -3 5.21 0.7
-12 18 3 5.93 0.63
-12 18 3 5.67 0.31
12 18 -3 6.21 0.57
-12 18 3 5.92 0.33
10 -18 -3 8.53 0.42
-10 -18 3 8.11 0.44
-10 18 3 9.55 0.62
-10 18 3 9.78 0.41
10 18 -3 8.13 0.86
10 18 -3 8.06 0.7
-10 18 3 9.32 0.38
-8 -18 3 19.84 0.73
-8 -18 3 20.34 0.8
8 -18 -3 20.79 0.72
8 18 -3 22.66 0.96
-8 18 3 23.35 0.78
8 18 -3 19.96 1.1
-8 18 3 22.76 0.76
-8 18 3 23.53 0.96
-6 -18 3 6.98 0.35
6 -18 -3 6.83 0.25
-6 -18 3 7.23 0.45
6 -18 -3 6.58 0.36
-6 -18 3 7.05 0.39
-6 18 3 7.88 0.33
-6 18 3 6.96 0.54
-6 18 3 7.68 0.36
6 18 -3 6.27 0.61
6 18 -3 6.57 0.57
4 -18 -3 33.26 1.1
-4 -18 3 33.08 1.13
-4 -18 3 33.9 1.07
-4 -18 3 32.12 1.1
4 -18 -3 33.58 1.06
-4 18 3 24.76 0.99
4 18 -3 24.55 1.01
4 18 -3 23.92 1.04
-4 18 3 24.31 0.84
-4 18 3 24.56 0.82
2 -18 -3 10.36 0.42
2 -18 -3 10.31 0.4
-2 -18 3 10.63 0.48
-2 -18 3 10.52 0.36
2 -18 -3 10.01 0.45
-2 -18 3 10.51 0.36
-2 -18 3 10.31 0.45
2 18 -3 9.31 0.57
-2 18 3 9.14 0.44
2 18 -3 8.99 0.6
-2 18 3 9.6 0.4
-2 18 3 8.92 0.64
0 -18 -3 7.06 0.36
0 18 3 8.87 0.44
0 18 -3 9.38 0.55
0 18 3 9.36 0.59
0 18 -3 7.89 0.58
2 -18 3 21.91 0.78
2 -18 3 22.38 0.82
-2 -18 -3 22.43 0.78
2 18 3 15.26 0.6
-2 18 -3 14.31 0.67
2 18 3 15.46 0.63
-2 18 -3 15.84 0.68
2 18 3 15.75 0.78
4 -18 3 2.19 0.23
4 -18 3 2.49 0.26
-4 -18 -3 2.43 0.24
-4 -18 -3 2.35 0.16
4 18 3 3.31 0.28
4 18 3 3.51 0.45
-4 18 -3 4.02 0.38
4 18 3 3.63 0.32
4 18 3 3.33 0.3
-4 18 -3 3.21 0.33
6 -18 3 1.46 0.26
6 -18 3 1.54 0.23
-6 -18 -3 1.23 0.24
-6 -18 -3 1.39 0.16
-6 18 -3 0.25 0.25
6 18 3 0.03 0.25
6 18 3 0.36 0.23
6 18 3 0.32 0.39
-6 18 -3 0.31 0.24
6 18 3 0.54 0.28
8 -18 3 0.95 0.24
-8 -18 -3 1.16 0.18
-8 -18 -3 1.19 0.26
8 -18 3 1.01 0.25
8 18 3 0.01 0.43
8 18 3 0.25 0.28
8 18 3 0.34 0.27
-8 18 -3 0.15 0.25
-8 18 -3 0.17 0.27
10 -18 3 2.63 0.3
-10 -18 -3 2.35 0.23
-10 -18 -3 2.12 0.31
10 -18 3 2.45 0.29
-10 18 -3 0.85 0.28
10 18 3 1.23 0.52
10 18 3 0.59 0.29
-10 18 -3 1.04 0.28
10 18 3 0.75 0.37
12 -18 3 5.93 0.43
-12 -18 -3 5.38 0.39
12 -18 3 6.12 0.42
-12 -18 -3 5.82 0.42
12 18 3 5.79 0.54
-12 18 -3 5.27 0.45
12 18 3 4.53 0.69
12 18 3 5.55 0.51
-12 18 -3 5.72 0.49
14 -18 3 3.87 0.35
-14 -18 -3 3.22 0.38
-14 -18 -3 3.49 0.3
14 18 3 3.18 0.39
14 18 3 2.84 0.76
-14 18 -3 2.55 0.37
-14 18 -3 2.72 0.33
-14 18 -3 2.65 0.35
-16 -18 -3 2.51 0.39
-16 -18 -3 2.42 0.31
16 18 3 1 0.67
16 18 3 2.12 0.38
-16 18 -3 1.95 0.33
-16 18 -3 1.88 0.34
-18 -18 -3 4.34 0.38
-18 -18 -3 5.2 0.48
-18 18 -3 5.72 0.48
18 18 3 3.95 0.84
18 18 3 6.51 0.56
-18 18 -3 5.61 0.47
-20 -18 -3 2.12 0.44
-20 -18 -3 1.24 0.36
-20 18 -3 0.98 0.36
20 18 3 0.92 0.76
-22 -18 -3 1.54 0.45
-22 -18 -3 1.15 0.37
-22 18 -3 0.3 0.36
22 18 3 1.27 0.82
24 18 3 4.3 1.05
-23 -19 3 2.27 0.45
-23 -19 3 2.37 0.43
23 19 -3 3.63 0.89
23 19 -3 3.92 0.57
-21 -19 3 0.82 0.38
-21 -19 3 0.54 0.41
21 19 -3 1.54 0.74
21 19 -3 1.49 0.49
-21 19 3 1.28 0.22
-19 -19 3 2.3 0.39
-19 -19 3 1.38 0.36
19 19 -3 1.5 0.69
19 19 -3 1.71 0.49
-19 19 3 2.35 0.23
-17 -19 3 3.67 0.42
-17 -19 3 3.36 0.37
17 19 -3 1.36 0.45
-17 19 3 1.87 0.21
17 19 -3 2.07 0.71
-15 -19 3 10.73 0.6
-15 -19 3 10.1 0.62
-15 19 3 8.65 0.39
15 19 -3 7.19 0.83
-15 19 3 7.29 0.68
15 19 -3 8.1 0.69
13 -19 -3 10.82 0.49
-13 -19 3 10.68 0.59
-13 -19 3 9.93 0.56
-13 19 3 8.34 0.37
13 19 -3 6.85 0.8
-13 19 3 7.33 0.64
13 19 -3 7.37 0.66
11 -19 -3 5.88 0.37
-11 -19 3 5.95 0.42
11 19 -3 5.12 0.65
-11 19 3 7.01 0.32
11 19 -3 6.62 0.59
-11 19 3 6.78 0.35
-11 19 3 6.1 0.58
-9 -19 3 4.75 0.39
-9 -19 3 4.4 0.3
9 -19 -3 4.04 0.33
-9 19 3 2.47 0.19
-9 19 3 2.47 0.39
-9 19 3 2.69 0.22
9 19 -3 1.83 0.42
9 19 -3 2.02 0.56
-7 -19 3 9.88 0.44
-7 -19 3 9.72 0.53
-7 -19 3 10.11 0.44
7 -19 -3 9.85 0.45
-7 19 3 10.35 0.44
-7 19 3 10.2 0.41
7 19 -3 9.41 0.8
-7 19 3 10.11 0.63
7 19 -3 9.26 0.65
5 -19 -3 2.52 0.17
-5 -19 3 2.3 0.23
-5 -19 3 2.99 0.31
-5 -19 3 2.89 0.2
5 -19 -3 2.53 0.25
5 19 -3 0.94 0.39
-5 19 3 0.8 0.19
-5 19 3 0.54 0.31
-5 19 3 1.18 0.16
5 19 -3 0.56 0.39
-3 -19 3 7.06 0.4
-3 -19 3 6.76 0.29
3 -19 -3 7.58 0.4
-3 -19 3 6.75 0.41
3 -19 -3 7.23 0.32
3 19 -3 5.24 0.57
-3 19 3 5.16 0.52
-3 19 3 4.54 0.3
3 19 -3 5.06 0.45
-3 19 3 4.69 0.34
1 -19 -3 2.47 0.21
-1 -19 3 2.74 0.3
-1 -19 3 3.37 0.27
1 -19 -3 2.48 0.25
1 19 -3 3.9 0.4
1 19 -3 3.88 0.4
-1 19 3 3.98 0.29
-1 19 3 3.82 0.42
-1 19 3 3.68 0.31
1 -19 3 11.92 0.51
1 -19 3 12.94 0.57
-1 -19 -3 12.57 0.54
-1 -19 -3 12.99 0.51
1 19 3 8.65 0.43
1 19 3 8.54 0.46
-1 19 -3 8.02 0.54
1 19 3 8.34 0.61
-1 19 -3 9.44 0.55
-3 -19 -3 0.68 0.21
3 -19 3 0.42 0.2
3 -19 3 0.76 0.23
3 19 3 0.56 0.24
3 19 3 0.7 0.25
-3 19 -3 0.64 0.27
3 19 3 0.7 0.42
-3 19 -3 0.29 0.31
3 19 3 0.67 0.22
-5 -19 -3 5.3 0.41
5 -19 3 5.66 0.39
-5 -19 -3 5.56 0.28
5 -19 3 5.39 0.38
5 19 3 2.36 0.32
-5 19 -3 2.69 0.32
5 19 3 2.22 0.31
5 19 3 2.17 0.27
5 19 3 2.32 0.45
-5 19 -3 2.86 0.36
7 -19 3 3.46 0.3
-7 -19 -3 2.4 0.29
-7 -19 -3 2.77 0.21
7 -19 3 2.31 0.27
-7 19 -3 1.09 0.28
7 19 3 1.12 0.51
-7 19 -3 0.82 0.31
7 19 3 0.85 0.26
7 19 3 1.22 0.32
9 -19 3 4.65 0.35
-9 -19 -3 5.23 0.37
-9 -19 -3 4.81 0.32
9 -19 3 4.56 0.33
9 19 3 4.24 0.39
9 19 3 3.69 0.59
9 19 3 4.98 0.46
-9 19 -3 5.41 0.45
-9 19 -3 5.02 0.41
-11 -19 -3 4.78 0.35
11 -19 3 5.54 0.39
11 -19 3 5.88 0.42
-11 -19 -3 5.19 0.4
11 19 3 4.62 0.5
11 19 3 4.23 0.68
-11 19 -3 4.75 0.4
11 19 3 4.55 0.42
-11 19 -3 4.84 0.48
13 -19 3 1.64 0.3
-13 -19 -3 1.44 0.26
13 -19 3 2.04 0.32
-13 -19 -3 1.83 0.35
13 19 3 1.5 0.38
-13 19 -3 1.39 0.3
-13 19 -3 2.07 0.35
13 19 3 1.13 0.64
-13 19 -3 1.95 0.33
-15 -19 -3 3.48 0.33
15 -19 3 3.11 0.37
-15 -19 -3 3.59 0.41
-15 19 -3 3.71 0.43
-15 19 -3 3.27 0.35
15 19 3 3.13 0.43
15 19 3 3.09 0.75
-15 19 -3 3.51 0.38
-17 -19 -3 7.17 0.53
-17 -19 -3 6.67 0.53
-17 19 -3 8.35 0.59
-17 19 -3 8.04 0.64
17 19 3 6.34 0.92
17 19 3 7.83 0.62
-17 19 -3 7.44 0.56
-19 -19 -3 0.08 0.39
-19 -19 -3 -0.07 0.3
19 19 3 0.36 0.84
-19 19 -3 0.06 0.35
-21 -19 -3 1.21 0.43
-21 -19 -3 1.1 0.36
-21 19 -3 0.88 0.38
21 19 3 1.57 0.83
-23 -19 -3 2.05 0.43
-23 -19 -3 2.76 0.48
23 19 3 2.22 0.89
-23 19 -3 1 0.41
-22 -20 3 3.33 0.47
-22 -20 3 3.24 0.46
22 20 -3 4.33 0.96
22 20 -3 3.54 0.62
-20 -20 3 0.22 0.36
-20 -20 3 0.28 0.4
-20 20 3 0.58 0.23
20 20 -3 1.49 0.81
20 20 -3 0.97 0.54
-18 -20 3 3.74 0.45
-18 -20 3 2.8 0.38
18 20 -3 3.07 0.73
18 20 -3 3.63 0.57
-18 20 3 3.88 0.31
-18 20 3 2.9 0.59
-16 -20 3 1.44 0.32
-16 -20 3 1.27 0.35
-16 20 3 0.54 0.18
16 20 -3 0.26 0.43
-16 20 3 0.2 0.41
16 20 -3 0.63 0.64
-14 -20 3 3 0.33
-14 -20 3 2.65 0.36
-14 20 3 3.21 0.23
14 20 -3 2.27 0.47
-14 20 3 2.42 0.47
14 20 -3 1.64 0.66
12 -20 -3 7.2 0.41
-12 -20 3 6.22 0.46
-12 20 3 4.05 0.5
12 20 -3 4.52 0.55
-12 20 3 4.26 0.31
12 20 -3 3.97 0.64
-10 -20 3 6.34 0.46
-10 -20 3 5.67 0.41
10 -20 -3 6.89 0.4
10 20 -3 5.7 0.54
10 20 -3 5.66 0.71
-10 20 3 6.53 0.32
-10 20 3 6.37 0.59
-10 20 3 6.52 0.36
-8 -20 3 9.15 0.44
-8 -20 3 9.82 0.56
-8 -20 3 9.24 0.45
8 -20 -3 9.46 0.45
8 20 -3 5.96 0.53
-8 20 3 5.52 0.56
-8 20 3 5.95 0.31
-8 20 3 5.67 0.34
8 20 -3 4.91 0.62
-6 -20 3 0.17 0.22
-6 -20 3 0.23 0.16
-6 -20 3 0.47 0.27
6 -20 -3 0.4 0.2
6 20 -3 0.13 0.38
-6 20 3 0.87 0.19
6 20 -3 1.46 0.47
-6 20 3 0.82 0.35
-6 20 3 0.76 0.16
-4 -20 3 5.22 0.37
-4 -20 3 5.36 0.27
4 -20 -3 5.42 0.25
4 -20 -3 5.44 0.37
-4 -20 3 5.92 0.45
-4 20 3 3.35 0.26
4 20 -3 2.89 0.46
-4 20 3 3.4 0.23
4 20 -3 2.91 0.45
-4 20 3 4.03 0.46
2 -20 -3 0.93 0.22
-2 -20 3 1.15 0.27
-2 -20 3 1.21 0.21
2 -20 -3 0.91 0.15
-2 -20 3 1.34 0.09
2 20 -3 2.23 0.4
-2 20 3 1.81 0.4
-2 20 3 1.7 0.2
-2 20 3 1.94 0.24
2 20 -3 1.98 0.41
0 -20 3 1.7 0.26
0 -20 3 1.65 0.24
0 -20 -3 1.17 0.19
0 -20 -3 1.62 0.25
0 20 3 1.28 0.21
0 20 -3 1.33 0.33
0 20 3 0.82 0.36
0 20 -3 0.69 0.33
0 20 3 0.9 0.24
2 -20 3 8.96 0.44
-2 -20 -3 9.18 0.44
2 -20 3 9.66 0.48
-2 -20 -3 10.05 0.49
2 20 3 6.89 0.45
2 20 3 7.62 0.63
-2 20 -3 7.6 0.53
-2 20 -3 6.75 0.52
2 20 3 6.9 0.45
2 20 3 7.25 0.42
4 -20 3 2.66 0.29
4 -20 3 2.51 0.26
-4 -20 -3 2.33 0.26
4 20 3 0.49 0.24
-4 20 -3 0.89 0.31
4 20 3 0.9 0.4
4 20 3 1.25 0.3
-4 20 -3 1.16 0.29
4 20 3 1.12 0.3
-6 -20 -3 1.5 0.17
-6 -20 -3 1.24 0.26
6 -20 3 1.05 0.26
6 -20 3 1.37 0.27
6 20 3 0.75 0.27
-6 20 -3 0.62 0.33
6 20 3 0.25 0.31
-6 20 -3 0.95 0.28
6 20 3 0.73 0.44
-8 -20 -3 7.82 0.38
8 -20 3 7.65 0.45
8 -20 3 8.11 0.52
-8 -20 -3 8.88 0.52
8 20 3 9.19 0.82
8 20 3 8.4 0.63
-8 20 -3 8.98 0.55
-8 20 -3 8.53 0.53
8 20 3 8.72 0.57
10 -20 3 9.15 0.5
-10 -20 -3 8.22 0.43
10 -20 3 9.19 0.51
-10 -20 -3 9.47 0.58
10 20 3 7.63 0.56
10 20 3 7.67 0.82
10 20 3 8.46 0.68
-10 20 -3 7.41 0.54
-10 20 -3 7.26 0.55
12 -20 3 1.15 0.29
12 -20 3 1.72 0.35
-12 -20 -3 1.18 0.33
-12 -20 -3 0.76 0.23
-12 20 -3 2.08 0.35
12 20 3 1.18 0.42
12 20 3 1.54 0.39
12 20 3 1.09 0.62
-12 20 -3 2.07 0.35
14 -20 3 2.89 0.38
-14 -20 -3 2.33 0.38
-14 -20 -3 3.11 0.31
-14 20 -3 3.14 0.36
14 20 3 2.69 0.73
-14 20 -3 3.24 0.39
14 20 3 3.61 0.45
-14 20 -3 3.56 0.42
-16 -20 -3 6.88 0.5
-16 -20 -3 8.29 0.64
16 20 3 7.2 0.66
-16 20 -3 8.06 0.58
-16 20 -3 8.37 0.63
16 20 3 5.4 0.88
-16 20 -3 7.49 0.59
-18 -20 -3 1.13 0.41
-18 -20 -3 0.39 0.31
-18 20 -3 0.87 0.4
18 20 3 0.28 0.83
-18 20 -3 0.42 0.35
-18 20 -3 1.2 0.44
-20 -20 -3 2.99 0.41
-20 -20 -3 3.31 0.48
-20 20 -3 2.38 0.38
20 20 3 2.44 0.85
-22 -20 -3 -0.2 0.38
-22 -20 -3 0.25 0.43
22 20 3 0.73 0.81
-22 20 -3 -0.47 0.38
23 21 -3 3.24 0.88
-21 -21 3 8.02 0.66
-21 -21 3 7.69 0.58
21 21 -3 6.86 0.7
21 21 -3 5.61 0.91
-21 21 3 5.59 0.68
-19 -21 3 0.15 0.39
-19 -21 3 0.14 0.35
-19 21 3 0.89 0.5
19 21 -3 1.12 0.55
19 21 -3 1.35 0.71
-17 -21 3 3.62 0.39
-17 -21 3 3.79 0.41
-17 21 3 3.7 0.3
17 21 -3 2.95 0.79
-17 21 3 3.21 0.54
17 21 -3 3.37 0.54
-15 -21 3 1.48 0.35
-15 -21 3 1.37 0.31
-15 21 3 0.82 0.18
15 21 -3 1.13 0.67
15 21 -3 0.89 0.45
-15 21 3 0.86 0.43
13 -21 -3 2.81 0.3
-13 -21 3 2.42 0.3
-13 21 3 1.91 0.21
13 21 -3 1.05 0.64
-13 21 3 1.4 0.43
13 21 -3 1.27 0.51
-11 -21 3 2.86 0.39
-11 -21 3 2.81 0.29
11 -21 -3 2.64 0.28
11 21 -3 2.2 0.46
-11 21 3 2.1 0.48
-11 21 3 2.62 0.22
11 21 -3 0.94 0.55
-9 -21 3 18.64 0.72
-9 -21 3 19.43 0.82
9 -21 -3 19.98 0.73
-9 -21 3 18.02 0.73
-9 21 3 18.24 0.66
-9 21 3 18.15 0.63
9 21 -3 18.31 0.97
-9 21 3 17.41 0.88
9 21 -3 16.24 1.02
-7 -21 3 3.12 0.33
7 -21 -3 2.77 0.28
-7 -21 3 2.84 0.23
-7 -21 3 3.01 0.29
-7 21 3 2.78 0.46
-7 21 3 2.84 0.24
7 21 -3 2.73 0.47
-7 21 3 3.07 0.22
7 21 -3 2.76 0.57
5 -21 -3 5.15 0.33
-5 -21 3 4.5 0.28
-5 -21 3 4.44 0.32
-5 -21 3 5.19 0.39
-5 21 3 2.54 0.21
5 21 -3 2.14 0.5
-5 21 3 2 0.4
-5 21 3 2.62 0.25
5 21 -3 1.42 0.41
-3 -21 3 15.13 0.51
-3 -21 3 15.24 0.65
-3 -21 3 15.64 0.6
3 -21 -3 14.95 0.52
3 -21 -3 15.48 0.62
3 21 -3 14.28 0.81
-3 21 3 13.38 0.56
-3 21 3 13.95 0.76
-3 21 3 12.8 0.53
3 21 -3 11.2 0.71
1 -21 -3 6.83 0.35
-1 -21 3 7.34 0.44
1 -21 -3 7.48 0.43
-1 -21 3 7.57 0.4
1 21 -3 8.46 0.63
-1 21 3 7.36 0.41
1 21 -3 8.15 0.59
-1 21 3 8.64 0.7
-1 21 3 7.26 0.46
1 -21 3 5.83 0.4
-1 -21 -3 5.51 0.37
1 -21 3 5.34 0.36
-1 -21 -3 5.23 0.35
1 21 3 3.04 0.28
1 21 3 3.63 0.35
1 21 3 3.41 0.47
1 21 3 4.06 0.34
-1 21 -3 3.81 0.43
-1 21 -3 3.38 0.41
3 -21 3 8.89 0.48
3 -21 3 8.65 0.47
-3 -21 -3 8.5 0.46
-3 -21 -3 9 0.5
3 21 3 7.06 0.5
3 21 3 7.1 0.45
3 21 3 7.39 0.53
-3 21 -3 7.84 0.61
-3 21 -3 7.59 0.54
3 21 3 7.94 0.69
-5 -21 -3 1.58 0.26
5 -21 3 1.59 0.28
5 -21 3 1.53 0.26
5 21 3 0.74 0.28
-5 21 -3 1.48 0.32
5 21 3 1.87 0.34
5 21 3 1.4 0.32
-5 21 -3 1.65 0.34
5 21 3 1.22 0.47
-7 -21 -3 6.2 0.34
7 -21 3 6.72 0.44
7 -21 3 5.86 0.42
-7 -21 -3 5.97 0.45
-7 21 -3 5.95 0.48
7 21 3 6.15 0.67
7 21 3 5.53 0.47
7 21 3 5.42 0.47
-7 21 -3 6.36 0.51
9 -21 3 3.24 0.34
-9 -21 -3 3.1 0.34
9 -21 3 3.03 0.34
-9 -21 -3 2.33 0.24
9 21 3 2.96 0.45
9 21 3 2.68 0.66
-9 21 -3 2.88 0.37
9 21 3 2.44 0.37
-9 21 -3 3.61 0.41
-11 -21 -3 3.07 0.36
11 -21 3 2.84 0.34
11 -21 3 2.47 0.32
-11 -21 -3 2.27 0.26
11 21 3 1.88 0.46
11 21 3 2.08 0.65
-11 21 -3 2.41 0.36
11 21 3 2.13 0.4
-11 21 -3 1.95 0.36
13 -21 3 1.71 0.32
-13 -21 -3 1.07 0.35
-13 -21 -3 1.19 0.26
13 -21 3 1.47 0.33
-13 21 -3 1.04 0.31
-13 21 -3 0.74 0.34
13 21 3 0.94 0.4
13 21 3 0.42 0.65
-13 21 -3 1.43 0.35
15 -21 3 3.95 0.45
-15 -21 -3 4.05 0.36
-15 -21 -3 4.92 0.46
15 21 3 4.05 0.47
15 21 3 3.47 0.81
-15 21 -3 4.07 0.42
-15 21 -3 4.16 0.47
-15 21 -3 3.56 0.39
-17 -21 -3 1.16 0.4
-17 -21 -3 0.73 0.32
-17 21 -3 1.06 0.4
17 21 3 1.54 0.4
17 21 3 0.36 0.74
-17 21 -3 0.68 0.35
-17 21 -3 0.75 0.37
-19 -21 -3 4.36 0.41
-19 -21 -3 3.86 0.47
19 21 3 3.14 0.89
-19 21 -3 5.87 0.49
-19 21 -3 5.25 0.56
-21 -21 -3 0.56 0.44
-21 -21 -3 0.6 0.38
21 21 3 0.15 0.81
-21 21 -3 0.69 0.45
-21 21 -3 0.04 0.37
-22 -22 3 0.47 0.4
22 22 -3 1.28 0.87
-22 22 3 0.93 0.56
-20 -22 3 3.1 0.43
-20 -22 3 3.4 0.47
20 22 -3 4.41 0.64
-20 22 3 2.43 0.63
20 22 -3 3.87 0.9
-18 -22 3 0.46 0.35
-18 -22 3 0.28 0.34
18 22 -3 0.9 0.48
-18 22 3 0.63 0.49
18 22 -3 1.46 0.77
-16 -22 3 5.78 0.47
-16 -22 3 6.03 0.44
16 22 -3 4.24 0.8
16 22 -3 5.15 0.59
-16 22 3 4.69 0.59
-16 22 3 4.68 0.33
-14 -22 3 1.83 0.31
14 -22 -3 1.96 0.3
-14 22 3 0.74 0.19
14 22 -3 0.75 0.65
-14 22 3 0.69 0.48
14 22 -3 0.83 0.52
-12 -22 3 3.27 0.31
-12 -22 3 3.79 0.44
12 -22 -3 3.21 0.31
-12 -22 3 3.21 0.32
12 22 -3 2.81 0.7
-12 22 3 3.9 0.52
12 22 -3 2.9 0.51
-12 22 3 3.54 0.31
10 -22 -3 4.95 0.4
-10 -22 3 5.97 0.44
-10 -22 3 5.24 0.41
-10 -22 3 5.63 0.42
-10 22 3 5.2 0.35
10 22 -3 5.69 0.61
10 22 -3 4.62 0.7
-10 22 3 5.54 0.59
-8 -22 3 15.11 0.64
8 -22 -3 16.58 0.65
-8 -22 3 15.74 0.62
-8 -22 3 14.79 0.69
8 22 -3 16.47 0.94
-8 22 3 16.5 0.86
-8 22 3 15.8 0.62
8 22 -3 15.14 1.04
-8 22 3 16.26 0.59
-6 -22 3 7.56 0.49
6 -22 -3 8.01 0.44
-6 -22 3 7.28 0.44
-6 -22 3 7.36 0.37
-6 22 3 5.85 0.61
-6 22 3 6.16 0.35
-6 22 3 6.33 0.39
6 22 -3 5.96 0.64
6 22 -3 5.79 0.55
4 -22 -3 20.35 0.78
-4 -22 3 21.05 0.78
-4 -22 3 20.49 0.81
-4 -22 3 20.28 0.68
-4 22 3 17.6 0.93
-4 22 3 17.44 0.64
4 22 -3 16.91 0.89
-4 22 3 16.89 0.67
4 22 -3 16.57 0.91
2 -22 -3 2.3 0.18
2 -22 -3 2.4 0.29
-2 -22 3 2.69 0.34
-2 -22 3 2.37 0.26
-2 22 3 2.32 0.23
2 22 -3 2.15 0.45
-2 22 3 2.18 0.28
2 22 -3 2.27 0.46
-2 22 3 2.28 0.43
0 -22 3 10.5 0.57
0 -22 -3 10.19 0.44
0 -22 -3 10 0.53
0 -22 3 10.86 0.52
0 22 -3 6.05 0.51
0 22 3 6.02 0.46
0 22 3 5.83 0.63
0 22 3 6.57 0.41
0 22 -3 6.13 0.6
0 22 3 5.83 0.47
2 -22 3 19.19 0.71
-2 -22 -3 16.57 0.69
-2 -22 -3 17.69 0.67
2 -22 3 16.99 0.72
2 22 3 15.19 0.86
2 22 3 14.55 0.64
-2 22 -3 15.11 0.76
-2 22 -3 13.24 0.73
2 22 3 13.78 0.66
2 22 3 15.1 0.68
-4 -22 -3 11.41 0.6
4 -22 3 11.04 0.56
-4 -22 -3 11.58 0.55
4 -22 3 12.3 0.57
4 22 3 10.77 0.63
-4 22 -3 10.58 0.69
4 22 3 11.01 0.57
-4 22 -3 10.56 0.66
4 22 3 10.37 0.8
4 22 3 9.4 0.63
6 -22 3 14.42 0.68
-6 -22 -3 14.23 0.64
6 -22 3 14.01 0.62
6 22 3 12.04 0.69
6 22 3 13.36 1
-6 22 -3 12.99 0.68
-6 22 -3 13.43 0.69
6 22 3 12.96 0.71
8 -22 3 2.44 0.33
-8 -22 -3 2.09 0.22
-8 -22 -3 1.82 0.31
8 -22 3 2.56 0.33
8 22 3 1.81 0.34
-8 22 -3 1.89 0.36
-8 22 -3 2.08 0.37
8 22 3 1.1 0.39
8 22 3 1.72 0.59
-10 -22 -3 10.48 0.5
10 -22 3 10.7 0.58
10 -22 3 10.17 0.61
-10 -22 -3 12.48 0.65
10 22 3 7.18 0.81
10 22 3 8.89 0.63
-10 22 -3 8.43 0.63
10 22 3 8.88 0.65
-10 22 -3 7.7 0.6
12 -22 3 3.61 0.38
-12 -22 -3 3.67 0.39
-12 -22 -3 3.25 0.3
12 -22 3 3.77 0.4
12 22 3 2.07 0.43
-12 22 -3 2.01 0.39
12 22 3 1.78 0.74
-12 22 -3 1.55 0.37
14 -22 3 0.49 0.36
-14 -22 -3 0.56 0.36
14 -22 3 0.34 0.33
-14 -22 -3 0.31 0.26
14 22 3 -0.01 0.77
-14 22 -3 0.16 0.36
-14 22 -3 0.08 0.35
14 22 3 0.26 0.43
-14 22 -3 0.3 0.31
-16 -22 -3 0.58 0.38
-16 -22 -3 0.67 0.3
-16 22 -3 0.82 0.39
16 22 3 0 0.75
16 22 3 -0.02 0.43
-16 22 -3 0.69 0.35
-16 22 -3 0.15 0.36
-18 -22 -3 2.14 0.44
-18 -22 -3 2.5 0.37
-18 22 -3 1.85 0.4
18 22 3 3.43 0.95
-18 22 -3 2.24 0.48
-20 -22 -3 0.92 0.44
-20 -22 -3 0.49 0.36
20 22 3 2.1 0.95
-20 22 -3 0.95 0.37
-20 22 -3 0.95 0.46
-21 -23 3 -0.05 0.38
-21 -23 3 0.15 0.43
21 23 -3 0.79 0.86
21 23 -3 0 0.56
-21 23 3 0.2 0.6
-19 -23 3 1.47 0.42
-19 -23 3 1.21 0.38
19 23 -3 1.55 0.81
-19 23 3 0.91 0.59
19 23 -3 1.5 0.51
-17 -23 3 1.96 0.41
-17 -23 3 1.65 0.35
-17 23 3 2.59 0.55
17 23 -3 2.36 0.71
17 23 -3 2.59 0.59
-15 -23 3 6.55 0.55
-15 23 3 4.63 0.33
-15 23 3 4.82 0.63
15 23 -3 4.3 0.63
15 23 -3 4.47 0.76
-13 -23 3 0.3 0.28
-13 -23 3 0.56 0.26
13 -23 -3 0.93 0.27
-13 -23 3 -0.05 0.38
13 23 -3 -0.13 0.45
-13 23 3 0.96 0.19
-13 23 3 0.6 0.45
13 23 -3 0.8 0.59
-11 -23 3 3.55 0.32
11 -23 -3 3.83 0.33
-11 -23 3 3.86 0.45
-11 -23 3 3.45 0.32
-11 23 3 3.21 0.25
11 23 -3 2.79 0.52
-11 23 3 3.66 0.52
11 23 -3 1.79 0.67
-9 -23 3 2.24 0.35
-9 -23 3 2.29 0.26
-9 -23 3 2.34 0.29
9 -23 -3 2.17 0.29
9 23 -3 1.93 0.58
-9 23 3 2.86 0.51
-9 23 3 2.51 0.24
9 23 -3 1.81 0.49
-7 -23 3 2.22 0.28
-7 -23 3 3.37 0.4
7 -23 -3 2.61 0.3
-7 -23 3 2.78 0.23
-7 23 3 3.68 0.31
7 23 -3 3.46 0.56
-7 23 3 3.52 0.28
-7 23 3 3.68 0.5
7 23 -3 2.94 0.62
5 -23 -3 1.84 0.29
-5 -23 3 1.74 0.25
-5 -23 3 2.03 0.17
-5 -23 3 2.01 0.33
5 23 -3 1.22 0.44
5 23 -3 0.99 0.51
-5 23 3 1.47 0.25
-5 23 3 1.42 0.42
-5 23 3 1.52 0.2
3 -23 -3 4.72 0.36
-3 -23 3 3.67 0.33
-3 -23 3 4.44 0.4
-3 23 3 4.07 0.51
-3 23 3 4.07 0.28
3 23 -3 4.1 0.49
-3 23 3 3.83 0.32
3 23 -3 3.24 0.53
-1 -23 3 7.45 0.49
1 -23 -3 7.7 0.35
1 -23 -3 7.97 0.48
-1 -23 3 7.23 0.46
1 23 -3 5.06 0.51
-1 23 3 4.75 0.58
-1 23 3 4.99 0.44
1 23 -3 4.94 0.52
-1 23 3 5.03 0.39
-1 23 3 4.98 0.44
-1 -23 -3 13.3 0.53
1 -23 3 12.96 0.6
1 -23 3 13.12 0.62
-1 -23 -3 12.91 0.58
-1 23 -3 7.9 0.7
1 23 3 7.44 0.54
1 23 3 7.25 0.54
1 23 3 9.08 0.5
-1 23 -3 8.79 0.66
1 23 3 8.85 0.73
-3 -23 -3 13.15 0.64
-3 -23 -3 13.59 0.57
3 -23 3 13.81 0.63
3 -23 3 12.82 0.62
3 23 3 11.87 0.59
3 23 3 10.7 0.83
-3 23 -3 11.82 0.7
3 23 3 11.37 0.63
3 23 3 11.3 0.61
-3 23 -3 11.42 0.69
-5 -23 -3 17.2 0.71
5 -23 3 17.51 0.74
-5 -23 -3 17.32 0.77
5 -23 3 17.59 0.71
-5 23 -3 14.87 0.75
-5 23 -3 13.85 0.79
5 23 3 14.26 0.74
5 23 3 13.42 0.74
5 23 3 14.2 0.94
7 -23 3 15.24 0.69
-7 -23 -3 15.11 0.68
7 -23 3 15.69 0.71
-7 23 -3 12.05 0.74
7 23 3 11.62 0.74
-7 23 -3 13.07 0.7
7 23 3 12.5 0.72
7 23 3 12.17 0.96
9 -23 3 17.06 0.75
9 -23 3 17.32 0.76
-9 -23 -3 16.53 0.65
-9 -23 -3 17.55 0.76
9 23 3 14.32 0.78
9 23 3 13.53 1.06
-9 23 -3 14.79 0.76
-9 23 -3 14.27 0.79
9 23 3 14.47 0.84
-11 -23 -3 2.88 0.36
11 -23 3 2.82 0.38
-11 -23 -3 2.67 0.28
11 -23 3 2.97 0.37
11 23 3 2.18 0.7
11 23 3 2.16 0.45
-11 23 -3 2.22 0.43
-11 23 -3 2.23 0.41
-13 -23 -3 0.76 0.26
13 -23 3 1.47 0.34
13 -23 3 1.12 0.35
-13 -23 -3 1.74 0.37
13 23 3 0 0.68
-13 23 -3 0.71 0.39
-13 23 -3 1.06 0.33
-13 23 -3 0.42 0.37
13 23 3 0.5 0.43
-15 -23 -3 0.42 0.37
-15 -23 -3 0.78 0.3
15 -23 3 0.62 0.4
15 23 3 -0.49 0.81
15 23 3 0.2 0.44
-15 23 -3 0.64 0.38
-15 23 -3 0.41 0.32
-15 23 -3 0.54 0.39
-17 -23 -3 1.25 0.41
-17 -23 -3 0.79 0.33
17 23 3 0.32 0.79
-17 23 -3 0.2 0.36
-17 23 -3 1.13 0.41
17 23 3 0.47 0.45
-17 23 -3 0.06 0.4
-19 -23 -3 -0.05 0.35
-19 -23 -3 0.49 0.42
-19 23 -3 1.01 0.39
19 23 3 0.6 0.82
-19 23 -3 0.58 0.47
-20 -24 3 1.25 0.4
20 24 -3 0.97 0.83
-20 24 3 -0.04 0.53
20 24 -3 1.04 0.52
-18 -24 3 0.69 0.36
-18 24 3 0.07 0.56
18 24 -3 2.14 0.59
18 24 -3 1.12 0.69
-16 -24 3 0.17 0.31
-16 24 3 1.16 0.56
16 24 -3 2.01 0.77
16 24 -3 1.12 0.51
-14 -24 3 1.68 0.33
14 -24 -3 2.07 0.32
-14 -24 3 2.32 0.46
-14 -24 3 1.82 0.31
14 24 -3 1.74 0.57
-14 24 3 0.89 0.2
-14 24 3 0.37 0.47
14 24 -3 0.95 0.71
12 -24 -3 0.37 0.26
-12 -24 3 0.14 0.27
-12 -24 3 0.05 0.39
-12 -24 3 0.31 0.28
12 24 -3 0.76 0.67
-12 24 3 0.45 0.2
12 24 -3 0.8 0.49
-12 24 3 0.72 0.46
-10 -24 3 3.51 0.3
10 -24 -3 3.73 0.34
-10 -24 3 4.21 0.34
-10 -24 3 3.52 0.41
10 24 -3 3.1 0.65
-10 24 3 4.46 0.35
-10 24 3 4.34 0.58
10 24 -3 4.02 0.57
-8 -24 3 -0.49 0.24
-8 -24 3 0.32 0.35
8 -24 -3 0.04 0.26
-8 -24 3 -0.02 0.19
-8 24 3 0.19 0.21
8 24 -3 -0.31 0.56
-8 24 3 0.05 0.4
8 24 -3 -0.21 0.45
6 -24 -3 3.28 0.32
-6 -24 3 2.25 0.2
-6 -24 3 2.5 0.29
-6 -24 3 2.28 0.35
6 24 -3 1.85 0.58
-6 24 3 1.12 0.25
-6 24 3 1.55 0.21
-6 24 3 1.81 0.45
6 24 -3 1.4 0.47
-4 -24 3 3.25 0.32
4 -24 -3 3.33 0.34
-4 -24 3 3.3 0.39
4 24 -3 0.79 0.5
-4 24 3 1.68 0.23
-4 24 3 1.49 0.46
-4 24 3 1.58 0.27
4 24 -3 0.91 0.51
2 -24 -3 3.51 0.35
-2 -24 3 2.83 0.29
-2 -24 3 2.87 0.36
-2 24 3 2.7 0.41
2 24 -3 2.41 0.47
-2 24 3 2.6 0.32
2 24 -3 2.33 0.5
-2 24 3 3.27 0.51
-2 24 3 3.35 0.28
0 -24 3 8.37 0.46
0 -24 -3 8.35 0.48
0 -24 -3 8.25 0.38
0 -24 3 8.45 0.58
0 24 -3 6.28 0.55
0 24 3 7.12 0.46
0 24 3 8.11 0.82
0 24 3 6.97 0.52
0 24 3 6.42 0.54
0 24 -3 6.93 0.68
-2 -24 -3 7.42 0.52
2 -24 3 7.42 0.5
2 -24 3 7.66 0.5
-2 -24 -3 7.51 0.41
2 24 3 4.57 0.64
2 24 3 4.81 0.46
-2 24 -3 4.67 0.5
-2 24 -3 4.43 0.5
2 24 3 4.95 0.38
2 24 3 4.5 0.42
-4 -24 -3 9.28 0.49
-4 -24 -3 8.35 0.52
4 -24 3 8.26 0.54
4 -24 3 10.29 0.55
4 24 3 6.69 0.58
-4 24 -3 6.86 0.55
4 24 3 8.22 0.61
-4 24 -3 6.56 0.61
4 24 3 6.89 0.74
6 -24 3 12.03 0.61
-6 -24 -3 10.74 0.57
6 -24 3 11.16 0.61
6 24 3 8.83 0.6
-6 24 -3 9.51 0.66
-6 24 -3 8.95 0.71
6 24 3 10.51 1.02
6 24 3 8.15 0.67
8 -24 3 11.53 0.66
8 -24 3 11.31 0.63
-8 -24 -3 11.16 0.61
8 24 3 9.41 0.63
-8 24 -3 9.69 0.66
-8 24 -3 8.65 0.64
8 24 3 9.98 0.75
8 24 3 9.53 0.96
10 -24 3 2.69 0.38
10 -24 3 2.83 0.41
-10 -24 -3 2.41 0.35
-10 24 -3 3.8 0.49
10 24 3 3.06 0.79
10 24 3 3.17 0.48
-10 24 -3 3.68 0.45
12 -24 3 2.71 0.38
-12 -24 -3 1.88 0.43
12 -24 3 2.42 0.37
-12 -24 -3 2.53 0.38
-12 24 -3 2.43 0.45
-12 24 -3 2.42 0.44
12 24 3 0.98 0.8
12 24 3 2.05 0.45
14 -24 3 1.17 0.4
-14 -24 -3 1.1 0.3
-14 -24 -3 1.63 0.38
14 -24 3 1.6 0.42
-14 24 -3 1.27 0.34
-14 24 -3 0.87 0.41
-14 24 -3 1.08 0.42
14 24 3 0.37 0.76
14 24 3 0.79 0.46
-16 -24 -3 1.29 0.33
-16 -24 -3 1.27 0.41
-16 24 -3 1.18 0.38
16 24 3 0.98 0.88
16 24 3 0.71 0.47
-16 24 -3 0.7 0.42
-16 24 -3 0.8 0.42
-18 -24 -3 0.94 0.37
-18 -24 -3 1.79 0.44
-18 24 -3 0.25 0.37
18 24 3 0.81 0.93
-19 25 3 0.01 0.54
19 25 -3 1.01 0.72
-17 -25 3 0.65 0.36
-17 -25 3 1.24 0.38
-17 25 3 0.39 0.51
17 25 -3 2.17 0.54
17 25 -3 1.17 0.76
-15 -25 3 -0.02 0.32
-15 -25 3 0.47 0.4
-15 -25 3 0.13 0.29
-15 25 3 0.39 0.49
15 25 -3 0.53 0.64
15 25 -3 0.17 0.5
-13 -25 3 0.3 0.43
-13 -25 3 0.25 0.29
13 -25 -3 0.28 0.3
-13 -25 3 0.16 0.28
13 25 -3 0.21 0.56
13 25 -3 0.7 0.71
-13 25 3 0.07 0.52
-13 25 3 0.61 0.21
-11 -25 3 3.01 0.31
-11 -25 3 2.19 0.32
11 -25 -3 3.04 0.34
-11 -25 3 2.51 0.45
-11 25 3 3.65 0.28
11 25 -3 2.7 0.68
-11 25 3 3.43 0.55
11 25 -3 3.48 0.64
9 -25 -3 0.76 0.3
-9 -25 3 0.81 0.22
-9 -25 3 0.38 0.34
-9 -25 3 0.91 0.28
9 25 -3 1.47 0.68
-9 25 3 1.6 0.53
-9 25 3 1.74 0.25
9 25 -3 2.23 0.59
-7 -25 3 1.22 0.27
-7 -25 3 1.6 0.36
7 -25 -3 1.7 0.31
7 25 -3 0.88 0.54
-7 25 3 0.3 0.24
-7 25 3 0.94 0.5
7 25 -3 0.11 0.57
-5 -25 3 3.84 0.41
-5 -25 3 3.82 0.35
5 -25 -3 4.27 0.37
-5 25 3 2.78 0.51
-5 25 3 2.88 0.26
5 25 -3 2.47 0.6
5 25 -3 2.41 0.51
-5 25 3 2.78 0.3
-3 -25 3 2.95 0.33
3 -25 -3 2.84 0.34
-3 -25 3 2.56 0.36
-3 25 3 1.72 0.48
-3 25 3 1.6 0.25
3 25 -3 1.02 0.53
3 25 -3 0.89 0.46
-3 25 3 2.3 0.41
-3 25 3 1.56 0.3
-1 -25 3 0.67 0.28
-1 -25 3 0.81 0.32
1 -25 -3 0.74 0.3
-1 25 3 0.57 0.52
-1 25 3 0.76 0.25
-1 25 3 0.19 0.29
1 25 -3 1.32 0.49
1 25 -3 0.27 0.46
-1 25 3 -0.19 0.33
-1 -25 -3 10.3 0.46
-1 -25 -3 10.87 0.56
1 -25 3 10.84 0.65
1 -25 3 11.25 0.58
-1 25 -3 9.84 0.71
-1 25 -3 10.24 0.76
1 25 3 9.54 0.62
1 25 3 8.93 0.58
1 25 3 9 0.55
1 25 3 9.76 0.82
[truncated: 465,030 more chars]
