# Supplementary material for: Improved Access to Chiral Tetranaphthoazepinium-Based Organocatalysts Using Aqueous Ammonia as Nitrogen Source
Source: Molecules. 2019 Oct 25;24(21):3844. doi: 10.3390/molecules24213844 (PMC6864439; doi:10.3390/molecules24213844)
Supplement: Supplementary file 1 [file molecules-24-03844-s001.zip › 7_tartrate_CCDC_1956064.cif]

data_mo_miwiauma39_c2
_publ_requested_journal          Catalysts
_publ_contact_author_name        'Michael Widhalm'
_publ_contact_author_address     
;Institute of Chemical Catalysis
University of Vienna
Waehringerstr. 38
1090 Vienna
Austria
;
_publ_contact_author_email       m.widhalm@univie.ac.at
_publ_contact_author_phone       '+43 14277 70305'
loop_
_publ_author_name
_publ_author_address
'Manaprasertsak, Auraya'
;Department of Chemistry
Faculty of Science
Kasetsart University
Bangkok 10900
Thailand
;
'Tharamak, Sorachat'
;Department of Chemistry
Faculty of Science
Kasetsart University
Bangkok 10900
Thailand
;
'Schedl, Christina'
;Institute of Organic Chemistry
University of Vienna
Waehringerstr. 38 
1090 Vienna
Austria
;
'Roller, Alexander'
;Institute of Inorganic Chemistry
University of Vienna
Waehringerstr. 42 
1090 Vienna 
Austria
;
_audit_creation_date             2019-09-24
_audit_creation_method           
;
Olex2 1.2
(compiled 2018.05.29 svn.r3508 for OlexSys, GUI svn.r5506)
;

_audit_contact_author_address    ?
_audit_contact_author_email      ?
_audit_contact_author_phone      ?
_publ_contact_author_id_orcid    ?
_publ_section_references         
;
Dolomanov, O.V., Bourhis, L.J., Gildea, R.J, Howard, J.A.K. & Puschmann, H.
 (2009), J. Appl. Cryst. 42, 339-341.

Sheldrick, G.M. (2008). Acta Cryst. A64, 112-122.

Sheldrick, G.M. (2015). Acta Cryst. C71, 3-8.

C. B. Huebschle, G. M. Sheldrick and B. Dittrich
ShelXle: a Qt graphical user interface for SHELXL
J. Appl. Cryst., 44, (2011) 1281-1284.

A.L.Spek, Acta Cryst. 2009, D65, 148-155.
;
_chemical_name_systematic        
;
(R)-2,6-Diiodo-4,5-dihydro-3H-dinaphtho
[2,1-c:1',2'-e]azepin-4-ium ion  
;
_chemical_name_common            ?
_chemical_formula_moiety         'C22 H16 I2 N, C H2 Cl2, C9 H6 O4'
_chemical_formula_sum            'C32 H24 Cl2 I2 N O4'
_chemical_formula_weight         811.22
_space_group_crystal_system      monoclinic
_space_group_IT_number           5
_space_group_name_H-M_alt        'C 2'
_space_group_name_Hall           'C 2y'
_chemical_absolute_configuration ad
loop_
_space_group_symop_operation_xyz
'x, y, z'
'-x, y, -z'
'x+1/2, y+1/2, z'
'-x+1/2, y+1/2, -z'
_chemical_melting_point          ?
_exptl_crystal_description       block

_exptl_crystal_colour            'clear colourless'
_diffrn_ambient_temperature      100.0
loop_
_atom_type_symbol
_atom_type_description
_atom_type_scat_dispersion_real
_atom_type_scat_dispersion_imag
_atom_type_scat_source
C C 0.0033 0.0016 'International Tables Vol C Tables 4.2.6.8 and 6.1.1.4'
H H 0.0000 0.0000 'International Tables Vol C Tables 4.2.6.8 and 6.1.1.4'
Cl Cl 0.1484 0.1585 'International Tables Vol C Tables 4.2.6.8 and 6.1.1.4'
I I -0.4742 1.8119 'International Tables Vol C Tables 4.2.6.8 and 6.1.1.4'
N N 0.0061 0.0033 'International Tables Vol C Tables 4.2.6.8 and 6.1.1.4'
O O 0.0106 0.0060 'International Tables Vol C Tables 4.2.6.8 and 6.1.1.4'

_shelx_space_group_comment       
;
The symmetry employed for this shelxl refinement is uniquely defined
by the following loop, which should always be used as a source of
symmetry information in preference to the above space-group names.
They are only intended as comments.
;

_cell_length_a                   28.7403(11)
_cell_length_b                   12.0555(4)
_cell_length_c                   8.9062(3)
_cell_angle_alpha                90
_cell_angle_beta                 101.095(2)
_cell_angle_gamma                90
_cell_volume                     3028.14(18)
_cell_formula_units_Z            4
_cell_measurement_reflns_used    9468
_cell_measurement_temperature    100.0
_cell_measurement_theta_max      29.137
_cell_measurement_theta_min      2.75
_shelx_estimated_absorpt_T_max   0.894
_shelx_estimated_absorpt_T_min   0.856
_exptl_absorpt_coefficient_mu    2.292
_exptl_absorpt_correction_T_max  0.2650
_exptl_absorpt_correction_T_min  0.2263
_exptl_absorpt_correction_type   multi-scan
_exptl_absorpt_process_details   
;
SADABS-2012/1 (Bruker,2012) was used for absorption correction. 
wR2(int) was 0.0646 before and 0.0331 after correction. 
The Ratio of minimum to maximum transmission is 0.8540. 
The \l/2 correction factor is 0.0015.
;
_exptl_crystal_colour_lustre     clear
_exptl_crystal_colour_primary    colourless
_exptl_crystal_density_diffrn    1.779
_exptl_crystal_density_meas      ?
_exptl_crystal_density_method    ?
_exptl_crystal_F_000             1580
_exptl_crystal_size_max          0.07
_exptl_crystal_size_mid          0.07
_exptl_crystal_size_min          0.05
_exptl_transmission_factor_max   ?
_exptl_transmission_factor_min   ?
_diffrn_reflns_av_R_equivalents  0.0359
_diffrn_reflns_av_unetI/netI     0.0175
_diffrn_reflns_Laue_measured_fraction_full 0.999
_diffrn_reflns_Laue_measured_fraction_max 0.999
_diffrn_reflns_limit_h_max       34
_diffrn_reflns_limit_h_min       -34
_diffrn_reflns_limit_k_max       14
_diffrn_reflns_limit_k_min       -14
_diffrn_reflns_limit_l_max       10
_diffrn_reflns_limit_l_min       -10
_diffrn_reflns_number            47080
_diffrn_reflns_point_group_measured_fraction_full 0.999
_diffrn_reflns_point_group_measured_fraction_max 0.999
_diffrn_reflns_theta_full        25.242
_diffrn_reflns_theta_max         25.347
_diffrn_reflns_theta_min         2.330
_diffrn_detector_area_resol_mean ?
_diffrn_measured_fraction_theta_full 0.999
_diffrn_measured_fraction_theta_max 0.999
_diffrn_measurement_device_type  'Bruker D8 Venture'
_diffrn_measurement_method       '\f and \w scans'
_diffrn_radiation_probe          x-ray
_diffrn_radiation_type           MoK\a
_diffrn_radiation_wavelength     0.71073
_diffrn_source                   'sealed xray tube'
_diffrn_source_type              'Incoatec IuS'
_diffrn_standards_number         0
_reflns_Friedel_coverage         0.902
_reflns_Friedel_fraction_full    1.000
_reflns_Friedel_fraction_max     1.000
_reflns_number_gt                5469
_reflns_number_total             5534
_reflns_special_details          
;
 Reflections were merged by SHELXL according to the crystal
 class for the calculation of statistics and refinement.
 
 _reflns_Friedel_fraction is defined as the number of unique
 Friedel pairs measured divided by the number that would be
 possible theoretically, ignoring centric projections and
 systematic absences.
;
_reflns_threshold_expression     'I > 2\s(I)'
_computing_cell_refinement       'SAINT V8.32B (?, 2016)'
_computing_data_collection       APEX3
_computing_data_reduction        'SAINT V8.32B (?, 2016)'
_computing_molecular_graphics    'Olex2 (Dolomanov et al., 2009)'
_computing_publication_material  'Olex2 (Dolomanov et al., 2009)'
_computing_structure_refinement  'XL (Sheldrick, 2008)'
_computing_structure_solution    'XS (Sheldrick, 2008)'
_refine_diff_density_max         0.851
_refine_diff_density_min         -1.242
_refine_diff_density_rms         0.111
_refine_ls_abs_structure_details 
;
 Flack x determined using 2511 quotients [(I+)-(I-)]/[(I+)+(I-)]
 (Parsons, Flack and Wagner, Acta Cryst. B69 (2013) 249-259).
;
_refine_ls_abs_structure_Flack   -0.012(6)
_refine_ls_extinction_coef       .
_refine_ls_extinction_method     none
_refine_ls_goodness_of_fit_ref   1.129
_refine_ls_hydrogen_treatment    constr
_refine_ls_matrix_type           full
_refine_ls_number_parameters     364
_refine_ls_number_reflns         5534
_refine_ls_number_restraints     7
_refine_ls_R_factor_all          0.0367
_refine_ls_R_factor_gt           0.0362
_refine_ls_restrained_S_all      1.138
_refine_ls_shift/su_max          0.000
_refine_ls_shift/su_mean         0.000
_refine_ls_structure_factor_coef Fsqd
_refine_ls_weighting_details     
'w=1/[\s^2^(Fo^2^)+(0.0383P)^2^+21.9719P] where P=(Fo^2^+2Fc^2^)/3'
_refine_ls_weighting_scheme      calc
_refine_ls_wR_factor_gt          0.0894
_refine_ls_wR_factor_ref         0.0897
_refine_special_details          
;
_olex2_refinement_description
1. Fixed Uiso
 At 1.2 times of:
  All C(H) groups, All C(H,H) groups, All N(H,H) groups
2. Restrained distances
 Cl1-C8 \\sim Cl4-C6 \\sim Cl2-C6 \\sim Cl2-C8
 with sigma of 0.02
3. Uiso/Uaniso restraints and constraints
Uanis(Cl2) = Uanis(Cl4) = Uanis(Cl1) = Uanis(C8) = Uanis(C6)
4. Others
 Fixed Sof: Cl1(0.25) C8(0.25) H8B(0.25) H8A(0.25) Cl4(0.75) C6(0.75)
 H6A(0.75) H6B(0.75)
5.a Ternary CH refined with riding coordinates:
 C2S(H2S)
5.b Secondary CH2 refined with riding coordinates:
 N1(H1A,H1B), C11(H11A,H11B), C12(H12A,H12B), C8(H8B,H8A), C6(H6A,H6B)
5.c Aromatic/amide H refined with riding coordinates:
 C24(H24), C26(H26), C27(H27), C28(H28), C29(H29), C64(H64), C66(H66),
 C67(H67), C68(H68), C69(H69), C5S(H5S), C6S(H6S), C7S(H7S), C8S(H8S), C9S(H9S)
;
_atom_sites_solution_hydrogens   geom
_atom_sites_solution_primary     direct
_atom_sites_solution_secondary   ?
loop_
_atom_site_label
_atom_site_type_symbol
_atom_site_fract_x
_atom_site_fract_y
_atom_site_fract_z
_atom_site_U_iso_or_equiv
_atom_site_adp_type
_atom_site_occupancy
_atom_site_site_symmetry_order
_atom_site_calc_flag
_atom_site_refinement_flags_posn
_atom_site_refinement_flags_adp
_atom_site_refinement_flags_occupancy
_atom_site_disorder_assembly
_atom_site_disorder_group
I1 I 0.40673(2) 0.90215(4) 0.28631(6) 0.02986(15) Uani 1 1 d . . . . .
I2 I 0.42524(2) 0.22492(5) 0.51988(8) 0.0448(2) Uani 1 1 d . . . . .
N1 N 0.4296(2) 0.5705(5) 0.4237(7) 0.0162(13) Uani 1 1 d . . . . .
H1A H 0.444805 0.546886 0.517419 0.019 Uiso 1 1 calc R . . . .
H1B H 0.451262 0.605899 0.378629 0.019 Uiso 1 1 calc R . . . .
C11 C 0.4113(3) 0.4701(7) 0.3281(9) 0.0199(16) Uani 1 1 d . . . . .
H11A H 0.404468 0.490689 0.218443 0.024 Uiso 1 1 calc R . . . .
H11B H 0.435849 0.411353 0.342828 0.024 Uiso 1 1 calc R . . . .
C12 C 0.3920(3) 0.6518(6) 0.4449(8) 0.0173(15) Uani 1 1 d . . . . .
H12A H 0.406955 0.722398 0.485527 0.021 Uiso 1 1 calc R . . . .
H12B H 0.373838 0.622216 0.519930 0.021 Uiso 1 1 calc R . . . .
C21 C 0.3251(3) 0.4871(6) 0.3315(8) 0.0181(15) Uani 1 1 d . . . . .
C22 C 0.3671(3) 0.4271(6) 0.3738(8) 0.0165(15) Uani 1 1 d . . . . .
C23 C 0.3653(3) 0.3283(7) 0.4599(9) 0.0211(16) Uani 1 1 d . . . . .
C24 C 0.3259(3) 0.2961(7) 0.5073(9) 0.0249(18) Uani 1 1 d . . . . .
H24 H 0.326416 0.230127 0.565895 0.030 Uiso 1 1 calc R . . . .
C25 C 0.2837(3) 0.3580(7) 0.4722(9) 0.0205(16) Uani 1 1 d . . . . .
C26 C 0.2410(3) 0.3261(7) 0.5201(10) 0.0270(19) Uani 1 1 d . . . . .
H26 H 0.241137 0.261156 0.580542 0.032 Uiso 1 1 calc R . . . .
C27 C 0.2010(3) 0.3844(8) 0.4830(10) 0.035(2) Uani 1 1 d . . . . .
H27 H 0.173214 0.360187 0.516422 0.042 Uiso 1 1 calc R . . . .
C28 C 0.1998(3) 0.4816(8) 0.3945(11) 0.031(2) Uani 1 1 d . . . . .
H28 H 0.171244 0.522966 0.367992 0.037 Uiso 1 1 calc R . . . .
C29 C 0.2399(3) 0.5158(7) 0.3472(10) 0.0252(17) Uani 1 1 d . . . . .
H29 H 0.239041 0.582316 0.289470 0.030 Uiso 1 1 calc R . . . .
C30 C 0.2831(3) 0.4544(6) 0.3820(8) 0.0171(15) Uani 1 1 d . . . . .
C61 C 0.3266(2) 0.5897(6) 0.2372(8) 0.0163(14) Uani 1 1 d . . . . .
C62 C 0.3590(3) 0.6727(7) 0.2950(8) 0.0173(15) Uani 1 1 d . . . . .
C63 C 0.3612(3) 0.7694(7) 0.2074(9) 0.0195(16) Uani 1 1 d . . . . .
C64 C 0.3332(3) 0.7808(7) 0.0631(9) 0.0240(17) Uani 1 1 d . . . . .
H64 H 0.335012 0.846785 0.006299 0.029 Uiso 1 1 calc R . . . .
C65 C 0.3022(3) 0.6963(6) 0.0002(9) 0.0225(17) Uani 1 1 d . . . . .
C66 C 0.2743(3) 0.7054(8) -0.1506(9) 0.0296(19) Uani 1 1 d . . . . .
H66 H 0.276434 0.770493 -0.208937 0.035 Uiso 1 1 calc R . . . .
C67 C 0.2446(4) 0.6215(9) -0.2120(11) 0.037(2) Uani 1 1 d . . . . .
H67 H 0.226360 0.629105 -0.312350 0.045 Uiso 1 1 calc R . . . .
C68 C 0.2408(4) 0.5246(8) -0.1287(10) 0.036(2) Uani 1 1 d . . . . .
H68 H 0.219998 0.467052 -0.172739 0.043 Uiso 1 1 calc R . . . .
C69 C 0.2676(3) 0.5122(7) 0.0195(9) 0.0237(17) Uani 1 1 d . . . . .
H69 H 0.265161 0.445979 0.075402 0.028 Uiso 1 1 calc R . . . .
C70 C 0.2983(3) 0.5982(7) 0.0857(9) 0.0199(16) Uani 1 1 d . . . . .
Cl2 Cl 0.58639(18) 0.8616(5) 0.2053(7) 0.1095(14) Uani 1 1 d D . . . .
O1S O 0.47689(19) 0.5040(5) 0.6990(6) 0.0220(12) Uani 1 1 d . . . . .
O2S O 0.5104(2) 0.6698(5) 0.7416(7) 0.0299(13) Uani 1 1 d . . . . .
O3S O 0.45177(19) 0.4962(5) 0.9715(6) 0.0207(11) Uani 1 1 d . . . . .
O4S O 0.3861(2) 0.5504(6) 0.8079(7) 0.0323(14) Uani 1 1 d . . . . .
C1S C 0.4886(3) 0.5853(7) 0.7779(8) 0.0205(16) Uani 1 1 d . . . . .
C2S C 0.4773(3) 0.5920(7) 0.9401(8) 0.0195(16) Uani 1 1 d . . . . .
H2S H 0.458477 0.660449 0.950260 0.023 Uiso 1 1 calc R . . . .
C3S C 0.4078(3) 0.4816(7) 0.8901(9) 0.0231(17) Uani 1 1 d . . . . .
C4S C 0.3894(3) 0.3702(8) 0.9235(10) 0.030(2) Uani 1 1 d . . . . .
C5S C 0.4188(5) 0.2904(11) 1.0037(13) 0.049(3) Uani 1 1 d . . . . .
H5S H 0.451237 0.307669 1.040938 0.059 Uiso 1 1 calc R . . . .
C6S C 0.4017(6) 0.1842(12) 1.0313(19) 0.070(4) Uani 1 1 d . . . . .
H6S H 0.422602 0.126928 1.075913 0.084 Uiso 1 1 calc R . . . .
C7S C 0.3533(6) 0.1665(14) 0.9909(17) 0.077(5) Uani 1 1 d . . . . .
H7S H 0.340594 0.097366 1.015014 0.092 Uiso 1 1 calc R . . . .
C8S C 0.3232(5) 0.2455(13) 0.9173(15) 0.063(4) Uani 1 1 d . . . . .
H8S H 0.290126 0.230974 0.892289 0.076 Uiso 1 1 calc R . . . .
C9S C 0.3413(4) 0.3513(10) 0.8771(11) 0.045(3) Uani 1 1 d . . . . .
H9S H 0.321062 0.405503 0.821157 0.054 Uiso 1 1 calc R . . . .
Cl1 Cl 0.5049(7) 1.0336(18) 0.337(3) 0.1095(14) Uani 0.25 1 d D . P A -2
C8 C 0.536(2) 0.915(5) 0.279(10) 0.1095(14) Uani 0.25 1 d D . P A -2
H8B H 0.538728 0.868086 0.371652 0.131 Uiso 0.25 1 calc R . P A -2
H8A H 0.510058 0.880101 0.204785 0.131 Uiso 0.25 1 calc R . P A -2
Cl4 Cl 0.5163(2) 1.0337(6) 0.2055(10) 0.1095(14) Uani 0.75 1 d D . P A -1
C6 C 0.5279(6) 0.8920(17) 0.189(4) 0.1095(14) Uani 0.75 1 d D . P A -1
H6A H 0.515410 0.851187 0.269130 0.131 Uiso 0.75 1 calc R . P A -1
H6B H 0.510698 0.865376 0.088391 0.131 Uiso 0.75 1 calc R . P A -1

loop_
_atom_site_aniso_label
_atom_site_aniso_U_11
_atom_site_aniso_U_22
_atom_site_aniso_U_33
_atom_site_aniso_U_23
_atom_site_aniso_U_13
_atom_site_aniso_U_12
I1 0.0354(3) 0.0208(3) 0.0352(3) 0.0013(3) 0.0113(2) -0.0105(3)
I2 0.0417(4) 0.0285(3) 0.0561(4) 0.0081(3) -0.0107(3) 0.0118(3)
N1 0.013(3) 0.025(3) 0.010(3) -0.005(3) 0.001(2) 0.000(3)
C11 0.020(4) 0.022(4) 0.016(4) -0.003(3) 0.000(3) 0.002(3)
C12 0.016(4) 0.020(4) 0.017(4) -0.002(3) 0.006(3) -0.002(3)
C21 0.024(4) 0.016(4) 0.013(3) -0.001(3) 0.001(3) -0.001(3)
C22 0.023(4) 0.014(4) 0.011(3) 0.001(3) 0.000(3) 0.002(3)
C23 0.026(4) 0.020(4) 0.014(4) 0.000(3) -0.004(3) 0.004(3)
C24 0.041(5) 0.016(4) 0.015(4) 0.002(3) -0.002(3) -0.005(3)
C25 0.029(4) 0.019(4) 0.012(3) -0.004(3) 0.002(3) -0.006(3)
C26 0.039(5) 0.023(4) 0.022(4) 0.002(3) 0.013(4) -0.013(4)
C27 0.039(5) 0.034(6) 0.037(5) -0.015(4) 0.023(4) -0.023(4)
C28 0.026(4) 0.031(5) 0.039(5) -0.011(4) 0.014(4) -0.005(4)
C29 0.022(4) 0.023(4) 0.031(4) -0.002(3) 0.006(3) -0.002(3)
C30 0.024(4) 0.015(3) 0.012(3) -0.002(3) 0.002(3) -0.002(3)
C61 0.013(3) 0.018(4) 0.018(3) 0.005(3) 0.002(3) 0.003(3)
C62 0.014(3) 0.023(4) 0.016(4) 0.001(3) 0.006(3) 0.001(3)
C63 0.019(4) 0.021(4) 0.021(4) 0.003(3) 0.011(3) 0.002(3)
C64 0.032(4) 0.022(4) 0.020(4) 0.009(3) 0.008(3) 0.005(4)
C65 0.029(4) 0.018(4) 0.021(4) 0.006(3) 0.007(3) 0.002(3)
C66 0.036(5) 0.033(5) 0.020(4) 0.009(4) 0.005(3) 0.007(4)
C67 0.043(6) 0.037(5) 0.026(5) 0.008(4) -0.005(4) 0.002(4)
C68 0.045(6) 0.033(5) 0.026(5) 0.000(4) -0.002(4) -0.010(4)
C69 0.024(4) 0.025(4) 0.020(4) 0.006(3) -0.001(3) -0.002(3)
C70 0.022(4) 0.022(4) 0.015(4) 0.002(3) 0.001(3) 0.006(3)
Cl2 0.086(2) 0.105(3) 0.137(4) -0.002(3) 0.019(2) -0.032(2)
O1S 0.023(3) 0.028(3) 0.014(3) -0.002(2) 0.001(2) -0.002(2)
O2S 0.043(4) 0.028(3) 0.022(3) 0.003(2) 0.012(3) 0.000(3)
O3S 0.018(3) 0.031(3) 0.013(3) 0.004(2) 0.003(2) -0.005(2)
O4S 0.023(3) 0.042(4) 0.029(3) 0.000(3) 0.000(2) 0.001(3)
C1S 0.019(4) 0.027(4) 0.016(4) 0.007(3) 0.003(3) 0.006(3)
C2S 0.014(4) 0.030(4) 0.014(4) 0.006(3) 0.003(3) 0.001(3)
C3S 0.015(4) 0.035(5) 0.019(4) -0.001(4) 0.004(3) -0.002(3)
C4S 0.032(5) 0.037(5) 0.024(4) -0.010(4) 0.014(4) -0.017(4)
C5S 0.055(7) 0.053(7) 0.042(6) 0.001(5) 0.016(5) -0.012(6)
C6S 0.080(10) 0.043(7) 0.096(11) -0.005(7) 0.042(9) -0.012(7)
C7S 0.104(12) 0.071(10) 0.064(9) -0.007(8) 0.040(9) -0.051(10)
C8S 0.054(7) 0.084(10) 0.059(7) -0.037(7) 0.029(6) -0.054(7)
C9S 0.038(5) 0.071(7) 0.027(5) -0.025(5) 0.012(4) -0.030(5)
Cl1 0.086(2) 0.105(3) 0.137(4) -0.002(3) 0.019(2) -0.032(2)
C8 0.086(2) 0.105(3) 0.137(4) -0.002(3) 0.019(2) -0.032(2)
Cl4 0.086(2) 0.105(3) 0.137(4) -0.002(3) 0.019(2) -0.032(2)
C6 0.086(2) 0.105(3) 0.137(4) -0.002(3) 0.019(2) -0.032(2)

_geom_special_details            
;
 All esds (except the esd in the dihedral angle between two l.s. planes)
 are estimated using the full covariance matrix.  The cell esds are taken
 into account individually in the estimation of esds in distances, angles
 and torsion angles; correlations between esds in cell parameters are only
 used when they are defined by crystal symmetry.  An approximate (isotropic)
 treatment of cell esds is used for estimating esds involving l.s. planes.
;
loop_
_geom_bond_atom_site_label_1
_geom_bond_atom_site_label_2
_geom_bond_distance
_geom_bond_site_symmetry_2
_geom_bond_publ_flag
I1 C63 2.101(8) . ?
I2 C23 2.109(8) . ?
N1 C11 1.514(10) . ?
N1 C12 1.498(10) . ?
C11 C22 1.500(11) . ?
C12 C62 1.502(10) . ?
C21 C22 1.396(11) . ?
C21 C30 1.420(11) . ?
C21 C61 1.501(10) . ?
C22 C23 1.423(10) . ?
C23 C24 1.342(12) . ?
C24 C25 1.406(12) . ?
C25 C26 1.425(12) . ?
C25 C30 1.412(11) . ?
C26 C27 1.334(14) . ?
C27 C28 1.409(14) . ?
C28 C29 1.366(12) . ?
C29 C30 1.428(11) . ?
C61 C62 1.396(11) . ?
C61 C70 1.439(10) . ?
C62 C63 1.411(11) . ?
C63 C64 1.386(12) . ?
C64 C65 1.397(12) . ?
C65 C66 1.430(11) . ?
C65 C70 1.422(11) . ?
C66 C67 1.367(14) . ?
C67 C68 1.399(14) . ?
C68 C69 1.403(12) . ?
C69 C70 1.415(12) . ?
Cl2 C8 1.81(2) . ?
Cl2 C6 1.698(17) . ?
O1S C1S 1.216(10) . ?
O2S C1S 1.270(10) . ?
O3S C2S 1.425(10) . ?
O3S C3S 1.341(10) . ?
O4S C3S 1.199(11) . ?
C1S C2S 1.543(10) . ?
C2S C2S 1.518(14) 2_657 ?
C3S C4S 1.495(12) . ?
C4S C5S 1.384(16) . ?
C4S C9S 1.382(13) . ?
C5S C6S 1.411(17) . ?
C6S C7S 1.39(2) . ?
C7S C8S 1.37(2) . ?
C8S C9S 1.449(18) . ?
Cl1 C8 1.82(2) . ?
Cl4 C6 1.752(19) . ?

loop_
_geom_angle_atom_site_label_1
_geom_angle_atom_site_label_2
_geom_angle_atom_site_label_3
_geom_angle
_geom_angle_site_symmetry_1
_geom_angle_site_symmetry_3
_geom_angle_publ_flag
C12 N1 C11 114.4(5) . . ?
C22 C11 N1 110.1(6) . . ?
N1 C12 C62 110.2(6) . . ?
C22 C21 C30 120.9(7) . . ?
C22 C21 C61 117.4(7) . . ?
C30 C21 C61 121.6(7) . . ?
C21 C22 C11 118.8(6) . . ?
C21 C22 C23 117.4(7) . . ?
C23 C22 C11 123.7(7) . . ?
C22 C23 I2 121.3(6) . . ?
C24 C23 I2 116.6(6) . . ?
C24 C23 C22 122.1(7) . . ?
C23 C24 C25 121.5(7) . . ?
C24 C25 C26 123.0(8) . . ?
C24 C25 C30 118.5(7) . . ?
C30 C25 C26 118.4(7) . . ?
C27 C26 C25 122.3(8) . . ?
C26 C27 C28 120.3(8) . . ?
C29 C28 C27 119.5(9) . . ?
C28 C29 C30 121.8(8) . . ?
C21 C30 C29 122.9(7) . . ?
C25 C30 C21 119.4(7) . . ?
C25 C30 C29 117.7(7) . . ?
C62 C61 C21 118.2(6) . . ?
C62 C61 C70 120.8(7) . . ?
C70 C61 C21 120.7(7) . . ?
C61 C62 C12 118.0(7) . . ?
C61 C62 C63 119.0(7) . . ?
C63 C62 C12 122.9(7) . . ?
C62 C63 I1 122.4(6) . . ?
C64 C63 I1 116.7(6) . . ?
C64 C63 C62 121.0(8) . . ?
C63 C64 C65 120.8(7) . . ?
C64 C65 C66 121.3(7) . . ?
C64 C65 C70 120.1(7) . . ?
C70 C65 C66 118.6(7) . . ?
C67 C66 C65 120.9(8) . . ?
C66 C67 C68 120.8(8) . . ?
C67 C68 C69 120.2(9) . . ?
C68 C69 C70 119.9(8) . . ?
C65 C70 C61 118.2(7) . . ?
C69 C70 C61 122.2(7) . . ?
C69 C70 C65 119.6(7) . . ?
C3S O3S C2S 117.8(6) . . ?
O1S C1S O2S 126.6(7) . . ?
O1S C1S C2S 119.9(7) . . ?
O2S C1S C2S 113.6(7) . . ?
O3S C2S C1S 110.5(7) . . ?
O3S C2S C2S 105.5(5) . 2_657 ?
C2S C2S C1S 110.5(8) 2_657 . ?
O3S C3S C4S 110.0(7) . . ?
O4S C3S O3S 124.4(8) . . ?
O4S C3S C4S 125.5(8) . . ?
C5S C4S C3S 121.5(8) . . ?
C9S C4S C3S 117.4(9) . . ?
C9S C4S C5S 121.1(10) . . ?
C4S C5S C6S 121.5(12) . . ?
C7S C6S C5S 117.4(15) . . ?
C8S C7S C6S 121.9(13) . . ?
C7S C8S C9S 120.6(11) . . ?
C4S C9S C8S 117.2(12) . . ?
Cl2 C8 Cl1 148(4) . . ?
Cl2 C6 Cl4 113.9(13) . . ?

loop_
_geom_torsion_atom_site_label_1
_geom_torsion_atom_site_label_2
_geom_torsion_atom_site_label_3
_geom_torsion_atom_site_label_4
_geom_torsion
_geom_torsion_site_symmetry_1
_geom_torsion_site_symmetry_2
_geom_torsion_site_symmetry_3
_geom_torsion_site_symmetry_4
_geom_torsion_publ_flag
I1 C63 C64 C65 179.2(6) . . . . ?
I2 C23 C24 C25 -179.2(6) . . . . ?
N1 C11 C22 C21 73.0(8) . . . . ?
N1 C11 C22 C23 -106.3(8) . . . . ?
N1 C12 C62 C61 73.8(8) . . . . ?
N1 C12 C62 C63 -102.8(8) . . . . ?
C11 N1 C12 C62 -45.4(8) . . . . ?
C11 C22 C23 I2 -4.3(10) . . . . ?
C11 C22 C23 C24 175.5(7) . . . . ?
C12 N1 C11 C22 -43.5(8) . . . . ?
C12 C62 C63 I1 -5.8(10) . . . . ?
C12 C62 C63 C64 173.8(7) . . . . ?
C21 C22 C23 I2 176.4(5) . . . . ?
C21 C22 C23 C24 -3.8(11) . . . . ?
C21 C61 C62 C12 2.8(10) . . . . ?
C21 C61 C62 C63 179.6(7) . . . . ?
C21 C61 C70 C65 -178.3(7) . . . . ?
C21 C61 C70 C69 0.6(11) . . . . ?
C22 C21 C30 C25 -2.0(11) . . . . ?
C22 C21 C30 C29 177.3(7) . . . . ?
C22 C21 C61 C62 -56.8(9) . . . . ?
C22 C21 C61 C70 118.0(8) . . . . ?
C22 C23 C24 C25 1.0(12) . . . . ?
C23 C24 C25 C26 179.7(8) . . . . ?
C23 C24 C25 C30 1.4(11) . . . . ?
C24 C25 C26 C27 -178.5(8) . . . . ?
C24 C25 C30 C21 -0.9(10) . . . . ?
C24 C25 C30 C29 179.8(7) . . . . ?
C25 C26 C27 C28 -0.5(13) . . . . ?
C26 C25 C30 C21 -179.3(7) . . . . ?
C26 C25 C30 C29 1.4(10) . . . . ?
C26 C27 C28 C29 -0.1(13) . . . . ?
C27 C28 C29 C30 1.4(13) . . . . ?
C28 C29 C30 C21 178.7(8) . . . . ?
C28 C29 C30 C25 -2.0(12) . . . . ?
C30 C21 C22 C11 -175.1(7) . . . . ?
C30 C21 C22 C23 4.3(10) . . . . ?
C30 C21 C61 C62 120.5(8) . . . . ?
C30 C21 C61 C70 -64.7(10) . . . . ?
C30 C25 C26 C27 -0.2(12) . . . . ?
C61 C21 C22 C11 2.2(10) . . . . ?
C61 C21 C22 C23 -178.4(6) . . . . ?
C61 C21 C30 C25 -179.2(7) . . . . ?
C61 C21 C30 C29 0.1(11) . . . . ?
C61 C62 C63 I1 177.7(5) . . . . ?
C61 C62 C63 C64 -2.7(11) . . . . ?
C62 C61 C70 C65 -3.6(11) . . . . ?
C62 C61 C70 C69 175.4(7) . . . . ?
C62 C63 C64 C65 -0.4(12) . . . . ?
C63 C64 C65 C66 -177.8(8) . . . . ?
C63 C64 C65 C70 1.5(12) . . . . ?
C64 C65 C66 C67 179.0(9) . . . . ?
C64 C65 C70 C61 0.4(11) . . . . ?
C64 C65 C70 C69 -178.6(8) . . . . ?
C65 C66 C67 C68 -0.1(15) . . . . ?
C66 C65 C70 C61 179.8(7) . . . . ?
C66 C65 C70 C69 0.8(12) . . . . ?
C66 C67 C68 C69 -0.1(16) . . . . ?
C67 C68 C69 C70 0.6(14) . . . . ?
C68 C69 C70 C61 -179.9(8) . . . . ?
C68 C69 C70 C65 -0.9(13) . . . . ?
C70 C61 C62 C12 -172.0(7) . . . . ?
C70 C61 C62 C63 4.7(11) . . . . ?
C70 C65 C66 C67 -0.3(13) . . . . ?
O1S C1S C2S O3S -1.9(10) . . . . ?
O1S C1S C2S C2S 114.6(6) . . . 2_657 ?
O2S C1S C2S O3S 178.4(6) . . . . ?
O2S C1S C2S C2S -65.2(7) . . . 2_657 ?
O3S C3S C4S C5S -11.5(11) . . . . ?
O3S C3S C4S C9S 165.7(7) . . . . ?
O4S C3S C4S C5S 171.5(9) . . . . ?
O4S C3S C4S C9S -11.3(13) . . . . ?
C2S O3S C3S O4S -10.6(12) . . . . ?
C2S O3S C3S C4S 172.3(6) . . . . ?
C3S O3S C2S C1S -66.5(9) . . . . ?
C3S O3S C2S C2S 174.0(7) . . . 2_657 ?
C3S C4S C5S C6S -178.1(10) . . . . ?
C3S C4S C9S C8S -176.6(8) . . . . ?
C4S C5S C6S C7S -7.3(19) . . . . ?
C5S C4S C9S C8S 0.6(14) . . . . ?
C5S C6S C7S C8S 5(2) . . . . ?
C6S C7S C8S C9S 1(2) . . . . ?
C7S C8S C9S C4S -3.4(16) . . . . ?
C9S C4S C5S C6S 4.8(16) . . . . ?

loop_
_refln_index_h
_refln_index_k
_refln_index_l
_refln_F_squared_meas
_refln_F_squared_sigma
0 0 1 148.82 2.75
0 0 1 135.69 3.12
0 0 1 139.39 2.87
0 0 1 146.43 2.76
0 0 2 20.13 0.67
0 0 2 20.1 0.64
0 0 2 20.11 0.7
0 0 2 19.65 0.86
0 0 -2 19.98 0.69
0 0 -2 20.87 0.62
0 0 -2 20.39 0.86
0 0 -2 20.52 0.58
0 0 3 16.42 0.71
0 0 3 14.58 0.89
0 0 3 16.6 0.67
0 0 -3 16.43 0.55
0 0 -3 15.76 0.69
0 0 -3 16.84 0.6
0 0 -3 15.51 0.89
0 0 4 495.1 10.61
0 0 4 486.96 10.84
0 0 4 493.26 9.87
0 0 -4 484.04 9.83
0 0 -4 496.15 9.42
0 0 -4 493.35 9.38
0 0 5 190.53 4.92
0 0 5 188.41 4.52
0 0 5 190.54 4.28
0 0 5 189.22 4.46
0 0 -5 186.43 3.88
0 0 -5 190.81 3.84
0 0 -5 188.9 4.23
0 0 6 24.72 1.16
0 0 6 26.78 1.23
0 0 6 30.5 1.68
0 0 6 24.96 1.18
0 0 -6 25.92 0.95
0 0 -6 27.03 1.22
0 0 -6 25.34 0.87
0 0 7 0.5 0.54
0 0 7 1.25 0.64
0 0 7 1.27 0.75
0 0 7 1.53 0.55
0 0 -7 0.49 0.61
0 0 8 1.31 0.59
0 0 8 -0.68 0.93
0 0 8 1.12 0.6
0 0 8 1.12 0.74
0 0 8 1.44 0.68
0 0 9 9.6 1.63
0 0 9 9.01 1.25
0 0 9 8.37 1.04
0 0 9 8.86 1.11
0 0 9 7.89 1.53
0 0 9 8.42 1.16
0 0 9 7.38 0.99
0 0 10 18 1.89
0 0 10 16.96 1.78
0 0 10 14.67 1.82
0 0 10 17.76 2.34
0 0 10 14.72 1.44
0 0 10 18.14 1.71
0 0 10 11.6 1.35
0 0 11 0.26 1.6
0 0 11 0.1 1.94
0 0 11 2.29 1.32
0 0 11 1.87 1.34
0 0 11 1.58 1.27
0 0 12 8.36 2.99
0 0 12 5.49 2.44
0 0 12 11.3 1.84
0 0 12 2.75 1.55
-1 1 12 2.9 1.52
-1 1 12 5.38 2.54
-1 1 12 0.86 1.68
-1 1 12 1.34 1.62
-1 1 12 6.45 2.5
-1 1 11 1.8 1.25
-1 1 11 1.67 1.22
-1 1 11 0.67 1.3
-1 1 11 -1.1 1.91
-1 1 11 1.41 1.66
-1 1 10 8.84 1.8
-1 1 10 9.9 1.2
-1 1 10 10.68 1.29
-1 1 10 10.11 1.33
-1 1 10 9.34 1.73
-1 1 9 4.06 0.98
-1 1 9 2.64 1.2
-1 1 9 2.71 0.75
-1 1 9 2.5 1.15
-1 1 8 20.09 1.4
-1 1 8 19.86 1.09
-1 1 8 19.8 1.87
-1 1 7 38.41 2.04
-1 1 7 36.26 1.36
-1 1 7 38.73 1.38
-1 1 7 36.84 1.61
-1 1 6 29.4 1.31
-1 1 6 29.71 1.12
-1 1 6 25.61 1.07
-1 1 6 29.17 1.65
-1 1 5 40.72 1.45
-1 1 5 39.8 1.72
-1 1 5 45.01 1.3
-1 1 4 44.37 1.23
-1 1 4 46.77 1.68
-1 1 4 45.05 1.43
-1 1 3 124.89 3.15
-1 1 3 126.73 2.86
1 -1 -1 39.92 0.82
1 -1 -1 40.56 0.94
-1 1 1 39.19 0.93
-1 1 1 39.65 0.94
1 -1 1 278.07 6.16
1 -1 1 289.7 5.57
1 -1 1 295.2 6.3
-1 1 -1 274.68 5.22
-1 1 -1 265.7 5.3
-1 1 -1 270.89 5.57
-1 1 -1 262.6 5.78
1 -1 2 843.08 17.25
1 -1 2 781.35 16.92
1 -1 2 809.41 16.32
-1 1 -2 768.11 14.37
-1 1 -2 744.98 15.81
1 -1 3 219.14 4.54
1 -1 3 231.46 5.22
1 -1 3 223.15 4.66
1 -1 3 220.92 5.27
-1 1 -3 204.21 4.31
-1 1 -3 212.14 4.31
-1 1 -3 199.99 4.9
-1 1 -3 210.11 4.22
1 -1 4 86.24 2.71
1 -1 4 93.11 2.47
1 -1 4 93.12 2.55
1 -1 4 89.51 2.25
-1 1 -4 76.48 2.47
-1 1 -4 79.71 2.01
-1 1 -4 80.7 1.92
-1 1 -4 78.89 2.01
1 -1 5 95 2.64
1 -1 5 92.98 2.44
1 -1 5 92.86 2.99
1 -1 5 95.8 2.72
-1 1 -5 97.96 2.41
-1 1 -5 95.43 3.05
-1 1 -5 97.01 2.48
-1 1 -5 98.57 2.32
1 -1 6 161.42 3.89
1 -1 6 163.62 4.2
1 -1 6 163.35 4.28
1 -1 6 165.41 4.7
-1 1 -6 163.03 3.84
-1 1 -6 165.51 3.59
-1 1 -6 161.47 3.68
-1 1 -6 160.97 4.63
1 -1 7 48.82 1.78
1 -1 7 43.95 1.83
1 -1 7 48.52 2.39
1 -1 7 46.1 1.92
1 -1 7 46.12 1.86
-1 1 -7 43.35 1.43
-1 1 -7 45.77 1.73
-1 1 -7 45.62 1.58
1 -1 8 24.27 1.41
1 -1 8 22.6 1.53
1 -1 8 26.12 1.47
1 -1 8 27.47 1.64
1 -1 8 26.42 1.54
1 -1 8 28.01 2.15
-1 1 -8 23.63 1.11
-1 1 -8 22.57 1.43
-1 1 -8 25.07 1.25
1 -1 9 25.34 2.5
1 -1 9 30.74 1.93
1 -1 9 25.41 1.73
1 -1 9 27.31 1.69
1 -1 9 26.29 2.39
1 -1 9 26.33 1.69
1 -1 9 25.79 1.72
1 -1 10 3.49 1
1 -1 10 5.53 1.97
1 -1 10 2.58 1.14
1 -1 10 3.6 1.43
1 -1 10 1.46 1.03
1 -1 10 4.28 1.17
1 -1 10 2.86 1.39
1 -1 11 9.74 1.33
1 -1 11 9.63 1.6
1 -1 11 6.83 1.23
1 -1 11 7.38 1.4
1 -1 11 6.6 2.39
1 -1 11 10.38 1.68
1 -1 11 9.41 2.17
1 -1 12 1.79 2.29
1 -1 12 4.18 2.63
1 -1 12 0.33 1.95
1 -1 12 0.63 2.34
-2 2 12 -1.36 1.59
-2 2 12 1.64 2.35
-2 2 12 0.57 1.79
-2 2 12 -2.87 2.07
-2 2 11 5.36 1.4
-2 2 11 4.31 2.03
-2 2 11 3.84 1.11
-2 2 11 3.01 1.21
-2 2 11 2.82 1.69
-2 2 11 3.89 1.25
-2 2 10 29.78 1.96
-2 2 10 22.29 2.46
-2 2 10 23.83 1.63
-2 2 10 30.2 2.83
-2 2 10 27.27 1.97
-2 2 9 2.64 0.96
-2 2 9 2.94 1.31
-2 2 9 3.85 1.04
-2 2 8 27.73 2
-2 2 8 28.17 1.63
-2 2 7 4.43 0.81
-2 2 7 4.92 1.1
-2 2 6 50.93 2.12
-2 2 6 48.65 1.79
-2 2 5 8.46 0.77
-2 2 5 7.41 0.89
-2 2 4 55.35 1.69
-2 2 3 234.11 5.06
-2 2 3 241.45 5.08
2 -2 -2 6.64 0.31
2 -2 -2 7.74 0.4
2 -2 -2 6.73 0.45
-2 2 2 4.84 0.31
-2 2 2 5.34 0.41
-2 2 2 5.64 0.4
2 -2 -1 46.68 1.19
2 -2 -1 45.65 1.11
2 -2 -1 47.99 1.29
2 -2 -1 47.11 1.11
2 -2 -1 46.83 1.09
-2 2 1 35.19 0.91
-2 2 1 40.05 1
-2 2 1 34.38 1.07
-2 2 1 35.03 0.96
-2 2 1 35.75 0.92
2 -2 0 2.28 0.33
2 -2 0 2.28 0.36
2 -2 0 2.49 0.37
2 -2 0 1.83 0.25
2 -2 0 2.06 0.3
-2 2 0 1.26 0.28
-2 2 0 1.04 0.31
-2 2 0 1.18 0.26
-2 2 0 1.17 0.3
-2 2 0 0.91 0.28
2 -2 1 524.27 11.13
2 -2 1 507.54 10.83
2 -2 1 508.38 9.84
2 -2 1 508.05 10.54
-2 2 -1 519.49 11.04
-2 2 -1 501.38 10.74
-2 2 -1 500.95 10.43
2 -2 2 689.45 14.87
2 -2 2 705.98 14.4
2 -2 2 701.94 13.46
2 -2 2 714.31 15.2
-2 2 -2 698.99 13.28
-2 2 -2 708.31 14.17
-2 2 -2 686.66 13.51
-2 2 -2 678.99 14.67
2 -2 3 32.25 1.25
2 -2 3 30.79 1.38
2 -2 3 32.25 1.11
2 -2 3 34.21 1.36
2 -2 3 32.49 1.08
-2 2 -3 26.77 1.31
-2 2 -3 29.9 1.01
-2 2 -3 30.07 1.05
-2 2 -3 31.14 1.16
2 -2 4 26.25 1.28
2 -2 4 25.09 1.05
2 -2 4 25.55 1.04
2 -2 4 26.5 1.21
2 -2 4 25.1 1.36
-2 2 -4 29.04 1.51
-2 2 -4 31.59 1.26
-2 2 -4 29.59 1.1
2 -2 5 17.79 1.13
2 -2 5 17.13 0.95
2 -2 5 19.61 1.2
2 -2 5 15.95 1.05
2 -2 5 15.52 1.28
-2 2 -5 16.51 0.89
-2 2 -5 15.72 0.91
-2 2 -5 17.07 1.04
-2 2 -5 14.51 1.31
2 -2 6 110.62 2.91
2 -2 6 113.36 3.4
2 -2 6 113.58 3.2
2 -2 6 111.09 3.29
2 -2 6 111.76 3.67
-2 2 -6 115.58 3.03
-2 2 -6 119.88 3.8
-2 2 -6 118.04 2.9
-2 2 -6 115.27 2.97
2 -2 7 61 2.1
2 -2 7 57.88 2.29
2 -2 7 61.15 2.42
2 -2 7 60.38 2.26
2 -2 7 59.06 2.03
2 -2 7 63.49 2.79
-2 2 -7 52.8 1.95
-2 2 -7 58.97 2.75
-2 2 -7 54.97 1.79
-2 2 -7 55.93 1.91
2 -2 8 23.54 1.46
2 -2 8 22.58 1.63
2 -2 8 21.88 1.66
2 -2 8 21.72 1.56
2 -2 8 20.58 1.64
2 -2 8 26.02 2.24
-2 2 -8 20.46 1.39
-2 2 -8 22.01 1.25
-2 2 -8 21.77 1.48
2 -2 9 3.68 1.12
2 -2 9 3.64 1.07
2 -2 9 2.69 0.91
2 -2 9 6.49 1.62
2 -2 9 4.12 1.07
2 -2 9 4.32 1.11
2 -2 9 1.77 1.37
-2 2 -9 3.01 0.77
-2 2 -9 0.34 0.79
-2 2 -9 3.36 0.95
2 -2 10 4.09 1.68
2 -2 10 7.51 1.91
2 -2 10 7.48 1.18
2 -2 10 5.48 1.32
2 -2 10 7.48 1.52
2 -2 10 6.79 1.39
2 -2 10 7.88 1.46
2 -2 11 12.07 2.31
2 -2 11 12.17 1.7
2 -2 11 14.53 1.59
2 -2 11 16.64 2.81
2 -2 11 12.84 1.97
2 -2 11 10.26 1.69
2 -2 11 11.65 1.91
2 -2 11 7.27 2.03
2 -2 12 -1.02 2.56
2 -2 12 4.82 2.23
2 -2 12 0.53 1.64
2 -2 12 0.96 2.7
-3 3 12 0.51 1.89
-3 3 12 2.64 1.48
-3 3 12 4.53 2.07
-3 3 12 10.46 2.62
-3 3 11 6.17 1.12
-3 3 11 6.21 1.49
-3 3 11 2.27 1.26
-3 3 11 3.68 1.8
-3 3 11 4.75 1.95
-3 3 10 2.85 1.28
-3 3 10 3.79 1.54
-3 3 10 1.59 1.17
-3 3 10 1.22 0.92
-3 3 9 19.42 1.67
-3 3 9 20.57 1.52
-3 3 9 21.96 1.96
-3 3 9 24.74 2.15
-3 3 8 65.03 2.25
-3 3 8 63.53 2.84
-3 3 8 64.36 2.44
-3 3 7 27.66 1.52
-3 3 7 27.02 1.37
-3 3 7 24.86 1.77
-3 3 6 39.53 1.65
-3 3 6 39.03 1.47
-3 3 6 42.03 1.91
-3 3 5 3.02 0.63
-3 3 5 3.43 0.52
-3 3 4 210.72 4.81
-3 3 4 215.42 4.72
3 -3 -3 73.13 1.8
-3 3 3 72.05 1.61
-3 3 3 72.26 1.85
-3 3 3 75.17 1.87
3 -3 -2 87.89 2.11
3 -3 -2 88.28 1.93
-3 3 2 83.3 2.25
-3 3 2 103.83 2.05
-3 3 2 82.22 2.12
-3 3 2 88.52 1.97
-3 3 2 89.85 2.07
3 -3 -1 53.94 1.36
3 -3 -1 51.97 1.6
3 -3 -1 53.12 1.41
3 -3 -1 53.76 1.45
3 -3 -1 54.47 1.36
-3 3 1 57.9 1.46
-3 3 1 58.07 1.55
-3 3 1 58.94 1.58
-3 3 1 58.64 1.5
-3 3 1 59.41 1.73
3 -3 0 6.35 0.53
3 -3 0 4.84 0.41
3 -3 0 6.96 0.61
3 -3 0 6.81 0.63
3 -3 0 6.55 0.57
3 -3 0 5.87 0.67
3 -3 0 7.18 0.55
-3 3 0 7.05 0.58
-3 3 0 7.13 0.63
-3 3 0 6.41 0.64
-3 3 0 5.92 0.7
-3 3 0 6.51 0.52
3 -3 1 120.02 2.72
3 -3 1 120.2 3.16
3 -3 1 117.92 3.03
3 -3 1 118.76 2.91
3 -3 1 118.91 2.84
3 -3 1 116.92 2.95
-3 3 -1 136.91 3.01
-3 3 -1 131.41 3.35
3 -3 2 38.28 1.52
3 -3 2 38.82 1.43
3 -3 2 37.48 1.48
3 -3 2 35.85 1.24
-3 3 -2 36.31 1.22
-3 3 -2 36.43 1.47
-3 3 -2 36.88 1.2
-3 3 -2 36.14 1.37
3 -3 3 139.86 3.8
-3 3 -3 90.27 2.27
3 -3 4 117.51 3.23
3 -3 4 117.32 3.51
3 -3 4 119.49 2.96
3 -3 4 118.84 3.46
-3 3 -4 109.62 2.8
-3 3 -4 112.31 2.98
-3 3 -4 112.19 2.76
-3 3 -4 116.05 3.42
3 -3 5 28.04 1.49
3 -3 5 27.87 1.66
3 -3 5 28.13 1.42
3 -3 5 28.44 1.56
-3 3 -5 26.53 1.19
-3 3 -5 26.97 1.39
-3 3 -5 26.99 1.73
3 -3 6 15.04 1.06
3 -3 6 12.27 1.28
3 -3 6 14.08 1.16
3 -3 6 16.12 1.52
3 -3 6 13.81 1.22
3 -3 6 12.76 1.31
-3 3 -6 11.31 1.6
-3 3 -6 10.9 0.96
-3 3 -6 12.56 1.04
-3 3 -6 13.62 1.23
3 -3 7 32.12 2.18
3 -3 7 34.58 1.9
3 -3 7 33.57 1.58
3 -3 7 36.33 2
3 -3 7 34.02 1.92
3 -3 7 30.58 1.69
-3 3 -7 34.11 1.52
-3 3 -7 33.03 2.31
-3 3 -7 30.85 1.48
-3 3 -7 32.38 1.75
3 -3 8 56.91 2.56
3 -3 8 61.51 2.22
3 -3 8 61.75 2.71
3 -3 8 58.56 2.41
3 -3 8 60.42 2.62
3 -3 8 63.28 3.11
-3 3 -8 62.21 2.21
-3 3 -8 59.77 2.13
3 -3 9 16.52 1.93
3 -3 9 15.83 1.9
3 -3 9 15.89 1.92
3 -3 9 16.42 2.01
3 -3 9 14.24 1.97
3 -3 9 20.7 2.36
-3 3 -9 15.88 1.44
-3 3 -9 15.15 1.78
-3 3 -9 14.14 1.55
3 -3 10 3 1.48
3 -3 10 1.84 1.72
3 -3 10 1.26 1.4
3 -3 10 1.59 1.25
3 -3 10 -0.05 1.73
3 -3 10 2.38 1.44
3 -3 10 0.21 1.35
-3 3 -10 0.98 1
-3 3 -10 3.88 1.23
3 -3 11 7.03 1.88
3 -3 11 5.86 1.7
3 -3 11 6.37 2.32
3 -3 11 7.75 2.06
3 -3 11 4.37 1.88
3 -3 11 3.43 2.32
-4 4 12 0.16 2.14
-4 4 12 6.36 2.55
-4 4 12 0.89 1.98
-4 4 11 15.3 2
-4 4 11 16.23 2.13
-4 4 11 14.94 1.97
-4 4 11 16.22 2.45
-4 4 10 -0.33 1.41
-4 4 10 -0.66 0.9
-4 4 10 3.76 1.29
-4 4 10 1.32 1.33
-4 4 9 9.98 1.33
-4 4 9 13.23 1.89
-4 4 9 9.07 1.36
-4 4 9 10.69 1.38
-4 4 8 7.25 1.07
-4 4 8 8.01 1.33
-4 4 8 6.18 1.07
-4 4 8 8.07 1.09
-4 4 7 110.08 3.25
-4 4 7 104.11 2.92
-4 4 7 105.38 3.55
-4 4 6 81.94 2.29
-4 4 6 76.95 2.52
-4 4 5 30.97 1.21
-4 4 5 32.01 1.42
-4 4 4 92.95 2.04
-4 4 4 88.95 2.33
-4 4 4 91.74 2.35
4 -4 -3 69.76 1.87
4 -4 -3 68.53 1.63
-4 4 3 70.3 1.75
-4 4 3 74.76 1.74
-4 4 3 71.17 1.82
-4 4 3 74.89 2.06
-4 4 3 72.98 1.94
4 -4 -2 194.99 3.93
4 -4 -2 181.66 4.18
4 -4 -2 188.07 3.91
4 -4 -2 186.28 4.46
-4 4 2 176.25 4.16
-4 4 2 166.96 3.84
-4 4 2 172.46 3.85
-4 4 2 169.89 3.59
-4 4 2 163.86 3.74
4 -4 -1 83.69 2.36
4 -4 -1 82.44 2.04
4 -4 -1 80.1 2.1
4 -4 -1 81.15 2.01
4 -4 -1 79.93 2.12
-4 4 1 83.83 2.26
-4 4 1 85.44 2.21
-4 4 1 84.72 2.38
-4 4 1 84.63 2.07
-4 4 1 86.5 2.47
4 -4 0 172.13 4.04
4 -4 0 161.24 4.13
4 -4 0 172.65 3.77
4 -4 0 176.19 4.01
4 -4 0 175.93 4.36
4 -4 0 176.21 3.53
4 -4 0 168.75 3.93
-4 4 0 170.15 4.09
-4 4 0 170.69 4
-4 4 0 168.82 4.17
-4 4 0 170.99 3.75
-4 4 0 177.26 4.39
4 -4 1 166.77 4.38
4 -4 1 171.07 4.12
4 -4 1 167.64 4.21
4 -4 1 168.71 3.97
4 -4 1 171.08 4.05
4 -4 1 170.69 3.8
-4 4 -1 170.94 3.9
-4 4 -1 178.24 4.28
-4 4 -1 179.29 4.39
4 -4 2 9.69 0.88
4 -4 2 10.68 0.92
4 -4 2 10.4 0.97
4 -4 2 11.74 0.84
4 -4 2 11.37 0.91
4 -4 2 9.19 0.8
-4 4 -2 12.2 0.78
-4 4 -2 11.57 1.03
-4 4 -2 11.84 0.99
4 -4 3 205.69 4.62
4 -4 3 204.84 4.99
4 -4 3 200.68 5.01
4 -4 3 203.58 5.24
4 -4 3 206.33 5.35
-4 4 -3 207.78 4.61
-4 4 -3 208.44 5.31
-4 4 -3 206.29 4.63
-4 4 -3 201.44 4.97
4 -4 4 11.42 1.03
4 -4 4 12.97 1.19
4 -4 4 11.21 0.95
4 -4 4 7.55 1.03
-4 4 -4 8.39 1.07
-4 4 -4 12.27 1.31
-4 4 -4 9.87 0.86
-4 4 -4 9.93 0.86
4 -4 5 97.4 3.09
4 -4 5 93.68 3.33
4 -4 5 98.05 2.9
4 -4 5 101.5 3.35
-4 4 -5 103.25 3.53
-4 4 -5 104.23 2.89
-4 4 -5 102.27 2.77
-4 4 -5 105.7 3.09
4 -4 6 39.19 2.11
4 -4 6 42.97 2.29
4 -4 6 43.56 2.07
4 -4 6 43.67 1.91
4 -4 6 42.13 2.2
-4 4 -6 42.39 1.98
-4 4 -6 42.12 1.7
-4 4 -6 44.05 1.76
-4 4 -6 42.21 2.41
4 -4 7 6.93 1.1
4 -4 7 7.05 1.18
4 -4 7 9.01 1.45
4 -4 7 9.51 1.46
4 -4 7 7.01 1.16
-4 4 -7 7.69 1.59
-4 4 -7 6.32 0.92
-4 4 -7 6.03 0.92
4 -4 8 12.77 1.78
4 -4 8 13.32 1.66
4 -4 8 15.46 2.2
4 -4 8 12.49 1.63
4 -4 8 11.32 1.58
4 -4 8 12.85 1.62
-4 4 -8 11.31 1.33
-4 4 -8 10.79 1.37
4 -4 9 9.11 1.81
4 -4 9 11.11 1.61
4 -4 9 9.41 1.76
4 -4 9 8.59 1.61
4 -4 9 13.15 1.8
4 -4 9 9.9 1.92
4 -4 9 10.42 1.57
-4 4 -9 10.72 2.26
-4 4 -9 8.63 1.46
-4 4 -9 11.42 1.35
-4 4 -9 11.04 1.32
4 -4 10 4.71 2.04
4 -4 10 5.02 1.57
4 -4 10 3.46 1.53
4 -4 10 5.41 1.71
4 -4 10 10.97 2.41
4 -4 10 7.26 1.69
4 -4 10 4.07 1.8
-4 4 -10 7.34 1.5
-4 4 -10 6.45 1.34
4 -4 11 3.23 2
4 -4 11 2.17 2.09
4 -4 11 2.82 2.51
4 -4 11 2.41 2.42
4 -4 11 0.44 1.74
-5 5 11 5.57 1.17
-5 5 11 5.35 1.73
-5 5 11 2.61 1.67
-5 5 11 7.1 2.04
-5 5 10 -0.2 1.52
-5 5 10 0.07 1.27
-5 5 10 2.27 0.96
-5 5 10 0.42 1.25
-5 5 9 4.07 1.23
-5 5 9 3.34 1.32
-5 5 9 4.12 1.21
-5 5 9 4.97 0.89
-5 5 8 21.75 1.88
-5 5 8 20.2 1.6
-5 5 8 18.2 1.58
-5 5 8 18.07 1.29
-5 5 7 43.04 1.83
-5 5 7 42.15 1.99
-5 5 7 41.4 1.63
-5 5 6 41.04 1.84
-5 5 6 42.89 1.55
-5 5 6 41.19 1.62
-5 5 5 15.75 1.16
-5 5 5 15.31 0.91
-5 5 5 14.74 0.71
-5 5 5 13.2 0.95
-5 5 5 15.66 0.77
5 -5 -4 31.03 1.15
5 -5 -4 29.9 1.21
-5 5 4 27.64 1.21
-5 5 4 28.15 0.98
-5 5 4 27.46 1.12
-5 5 4 25.89 1.05
5 -5 -3 89.24 2.16
5 -5 -3 90.75 2.39
5 -5 -3 90.46 2.52
-5 5 3 91.88 2.65
-5 5 3 93.83 2.44
-5 5 3 91.55 2.44
-5 5 3 95.34 2.25
5 -5 -2 412.51 8.84
5 -5 -2 391.74 7.77
5 -5 -2 373.75 8.04
5 -5 -2 377.78 7.99
5 -5 -2 382.96 8.27
-5 5 2 396.24 8.33
-5 5 2 397.89 8.93
-5 5 2 385.18 7.81
-5 5 2 380.74 8.37
5 -5 -1 136.64 3.28
5 -5 -1 128.33 3.07
5 -5 -1 128.95 3.13
5 -5 -1 132.86 3.58
5 -5 -1 128.88 3.23
-5 5 1 137.25 3.66
-5 5 1 133.67 3.1
-5 5 1 129.97 3.28
-5 5 1 129.8 3.38
-5 5 1 130.19 3.5
5 -5 0 37.25 1.08
5 -5 0 38.13 1.46
5 -5 0 38.38 1.46
5 -5 0 37.1 1.36
5 -5 0 38.37 1.38
5 -5 0 38.36 1.65
5 -5 0 36.64 1.51
-5 5 0 40.47 1.64
-5 5 0 39.87 1.38
-5 5 0 39.77 1.61
-5 5 0 41.27 1.77
-5 5 0 38.59 1.47
5 -5 1 15.55 1.06
5 -5 1 15.65 0.84
5 -5 1 14.87 0.96
5 -5 1 19.89 1.23
5 -5 1 16 1.06
5 -5 1 16.54 0.99
5 -5 1 15.59 1.03
-5 5 -1 14.31 1.1
-5 5 -1 14.04 0.87
-5 5 -1 11.8 1.07
5 -5 2 218.27 4.89
5 -5 2 209.81 5.42
5 -5 2 213.16 5.1
5 -5 2 220.13 5.24
5 -5 2 211.55 5.27
5 -5 2 220.23 5.66
-5 5 -2 206.87 5.36
-5 5 -2 208.04 5.19
-5 5 -2 214.54 4.77
5 -5 3 123.01 3.49
5 -5 3 122.16 3.21
5 -5 3 116.45 3.71
5 -5 3 129.95 3.37
5 -5 3 119.5 3.49
5 -5 3 120.49 3.65
-5 5 -3 122.63 3.53
-5 5 -3 122.91 3.21
-5 5 -3 126.11 3.2
-5 5 -3 126.98 3.78
5 -5 4 0.88 0.54
5 -5 4 1.12 0.7
5 -5 4 0.83 0.6
5 -5 4 1.17 0.58
5 -5 4 0.41 0.58
5 -5 4 0.57 0.59
-5 5 -4 1.66 0.81
-5 5 -4 0.86 0.48
-5 5 -4 0.45 0.67
-5 5 -4 0.9 0.58
5 -5 5 33.57 1.69
5 -5 5 35.52 1.75
5 -5 5 34.53 1.88
5 -5 5 36.48 2.03
5 -5 5 34.55 2.01
5 -5 5 37.46 2
-5 5 -5 34.68 2.15
-5 5 -5 36.02 1.6
-5 5 -5 34.51 1.61
5 -5 6 34.99 2.04
5 -5 6 34.63 2.14
5 -5 6 35.31 2.18
5 -5 6 30.84 2.11
5 -5 6 32.29 1.88
5 -5 6 35.45 2.15
-5 5 -6 33.9 1.66
-5 5 -6 30.64 2.38
-5 5 -6 37.32 1.77
-5 5 -6 33.15 2.01
5 -5 7 22.93 1.84
5 -5 7 22.33 2.03
5 -5 7 19.32 1.8
5 -5 7 19.5 1.96
5 -5 7 21.08 2.1
5 -5 7 23.57 2.22
-5 5 -7 19.59 1.51
-5 5 -7 22.5 1.57
5 -5 8 2.17 1.29
5 -5 8 1.84 1.19
5 -5 8 0.66 1.19
5 -5 8 1.6 1.4
5 -5 8 -0.56 1.25
5 -5 8 1.88 1.12
5 -5 8 0.74 1.02
-5 5 -8 1.86 1.01
-5 5 -8 0.55 1.57
-5 5 -8 0.21 0.85
5 -5 9 8.14 1.92
5 -5 9 8.46 1.68
5 -5 9 9.75 1.81
5 -5 9 8.5 1.65
5 -5 9 7.93 1.84
5 -5 9 6.57 1.81
5 -5 9 6.37 1.73
-5 5 -9 7.32 1.33
-5 5 -9 5.42 1.53
-5 5 -9 3.53 2.07
-5 5 -9 8.91 1.34
5 -5 10 5.56 1.95
5 -5 10 2.87 1.67
5 -5 10 6.82 2.21
5 -5 10 4.52 1.89
5 -5 10 5.98 1.84
5 -5 10 8.51 2.26
5 -5 10 7.11 1.89
-5 5 -10 6.94 1.61
-5 5 -10 8.65 1.58
5 -5 11 -1.21 2.02
5 -5 11 1.32 2.73
5 -5 11 0.48 1.99
5 -5 11 -2.21 2.47
-6 6 11 1.46 1.14
-6 6 11 1.93 1.74
-6 6 11 -2.11 2
-6 6 11 1.45 1.67
-6 6 10 18.15 1.64
-6 6 10 14.9 1.92
-6 6 10 14.95 1.71
-6 6 10 20.56 2.93
-6 6 9 27.67 2.42
-6 6 9 26.07 1.96
-6 6 9 30.74 2.18
-6 6 9 31.14 1.67
-6 6 8 1.31 0.69
-6 6 8 1.67 0.89
-6 6 8 -0.09 0.97
-6 6 8 0.57 0.8
-6 6 7 39.33 1.63
-6 6 7 41.35 2.1
-6 6 7 40.09 1.69
-6 6 6 19.65 1.15
-6 6 6 17.4 1.11
-6 6 6 21.17 1.5
-6 6 6 19.71 0.89
-6 6 6 20.47 1.08
-6 6 5 150.77 3.72
-6 6 5 151.9 3.67
-6 6 5 147.54 3.88
-6 6 5 155.08 4.11
-6 6 5 151.81 3.35
-6 6 5 154.57 3.38
6 -6 -4 80.62 2.32
-6 6 4 79.54 2.52
-6 6 4 83.05 2.33
-6 6 4 85.64 2.14
-6 6 4 80.48 2.35
6 -6 -3 37.39 1.44
6 -6 -3 38.76 1.34
6 -6 -3 37.23 1.61
-6 6 3 37.36 1.4
-6 6 3 35.31 1.48
-6 6 3 37.13 1.28
-6 6 3 35.36 1.61
6 -6 -2 38.06 1.49
6 -6 -2 40.01 1.41
6 -6 -2 39.45 1.64
6 -6 -2 38.08 1.26
6 -6 -2 37.06 1.29
-6 6 2 36.89 1.69
-6 6 2 36.59 1.43
-6 6 2 35.95 1.68
-6 6 2 34.94 1.53
-6 6 2 37.37 1.34
6 -6 -1 295.85 7.14
6 -6 -1 284.82 6.22
6 -6 -1 299.08 6.63
6 -6 -1 290.51 6.45
6 -6 -1 294.42 6.59
-6 6 1 290.64 7.01
-6 6 1 293.53 6.83
-6 6 1 300.05 6.69
-6 6 1 297.66 6.3
-6 6 1 299.74 7.29
6 -6 0 344.62 8.18
6 -6 0 339.5 7.63
6 -6 0 328.02 7.56
6 -6 0 332.88 7.45
6 -6 0 335.9 7.14
6 -6 0 343.83 6.73
-6 6 0 324.78 6.95
-6 6 0 317.74 7.69
-6 6 0 326.86 8.03
-6 6 0 332.81 7.57
-6 6 0 337.63 7.42
6 -6 1 98.41 2.77
6 -6 1 100.25 2.52
6 -6 1 102.51 2.87
6 -6 1 103.3 3.02
6 -6 1 100.62 3.08
6 -6 1 100.55 2.96
6 -6 1 99.28 3.24
-6 6 -1 108.8 3.52
-6 6 -1 108.86 3.28
-6 6 -1 107.8 3.32
-6 6 -1 109.39 2.91
6 -6 2 19.95 1.32
6 -6 2 20.4 1.43
6 -6 2 19.57 1.06
6 -6 2 19.39 1.23
6 -6 2 18.82 1.22
6 -6 2 20.36 1.34
6 -6 2 20.58 1.37
-6 6 -2 22.56 1.5
-6 6 -2 22.7 1.55
-6 6 -2 21.5 1.18
6 -6 3 40.19 1.79
6 -6 3 40.17 1.89
6 -6 3 41.78 2.06
6 -6 3 40.41 1.93
6 -6 3 40.79 1.76
6 -6 3 36.93 1.92
-6 6 -3 38.52 2.05
-6 6 -3 38.8 1.93
-6 6 -3 40.89 1.64
-6 6 -3 36.82 1.66
6 -6 4 124.68 4.09
6 -6 4 125.19 3.86
6 -6 4 125.04 3.53
6 -6 4 123.65 3.84
6 -6 4 125.68 4.04
6 -6 4 129.07 3.68
-6 6 -4 128.87 3.48
-6 6 -4 125.87 4.13
-6 6 -4 126.35 3.82
-6 6 -4 121.49 3.75
-6 6 -4 124.99 3.41
6 -6 5 96.5 3.47
6 -6 5 103.54 3.69
6 -6 5 101.8 3.45
6 -6 5 92.81 3.58
6 -6 5 95.66 3.1
6 -6 5 105.51 3.28
-6 6 -5 103.61 3.83
-6 6 -5 101.25 3
-6 6 -5 100.95 3.43
-6 6 -5 99.33 3.06
6 -6 6 2.44 1.21
6 -6 6 2.54 0.95
6 -6 6 2.54 1.07
6 -6 6 2.44 1.13
6 -6 6 5.79 1.22
6 -6 6 3.54 1.03
6 -6 6 2.33 0.91
-6 6 -6 2.8 0.9
-6 6 -6 1.38 1.09
6 -6 7 24.42 2.08
6 -6 7 23.23 2.51
6 -6 7 23.11 2.31
6 -6 7 24.31 2.12
6 -6 7 21.96 2.35
6 -6 7 23.5 2.11
6 -6 7 23.59 2.28
-6 6 -7 27.73 1.8
-6 6 -7 27.4 1.75
6 -6 8 4.65 1.38
6 -6 8 2.62 1.53
6 -6 8 1.72 1.58
6 -6 8 2.64 1.5
6 -6 8 2.42 1.32
6 -6 8 3.9 1.74
6 -6 8 2.84 1.31
-6 6 -8 2.31 1.09
-6 6 -8 1.05 1.25
-6 6 -8 1.9 1.08
-6 6 -8 1.73 1.81
6 -6 9 14.06 2.3
6 -6 9 10.23 2.01
6 -6 9 10.6 1.91
6 -6 9 11.57 2.14
6 -6 9 13.94 2.21
6 -6 9 9.87 1.89
6 -6 9 14.67 2.33
-6 6 -9 9.88 1.53
-6 6 -9 9.45 1.51
6 -6 10 0.79 2.12
6 -6 10 1.91 1.9
6 -6 10 2.54 2.15
6 -6 10 2.56 2.36
6 -6 11 7.52 2.61
6 -6 11 4.51 2.44
6 -6 11 -3.2 3.01
-7 7 11 0.31 1.76
-7 7 11 -0.6 2.14
-7 7 11 6.43 1.72
-7 7 10 13.11 1.99
-7 7 10 10.31 2.14
-7 7 10 13.65 1.63
-7 7 10 10.14 1.14
-7 7 9 1.86 1.35
-7 7 9 0.66 1.16
-7 7 9 2.7 0.83
-7 7 9 1.87 1.09
-7 7 8 17.97 1.44
-7 7 8 17.56 1.34
-7 7 8 18.58 1.9
-7 7 8 17.81 1.42
-7 7 7 15.45 1.17
-7 7 7 17.87 1.34
-7 7 7 16.37 1.21
-7 7 7 20.63 1.83
-7 7 6 28.03 1.19
-7 7 6 28.88 1.53
-7 7 6 29.46 1.17
-7 7 6 26.83 1.39
-7 7 6 30.55 1.84
7 -7 -5 78.04 2.36
7 -7 -5 78.83 2.43
-7 7 5 77.93 2.43
-7 7 5 75.9 2.33
-7 7 5 76.12 2.55
-7 7 5 76.46 2.1
7 -7 -4 49.8 1.82
7 -7 -4 49.93 1.9
-7 7 4 48.9 1.76
-7 7 4 47.16 2.01
-7 7 4 48.98 1.61
-7 7 4 50.89 1.91
7 -7 -3 177.1 4.05
7 -7 -3 177.37 4.65
7 -7 -3 170.23 4.3
-7 7 3 177.29 4.1
-7 7 3 182.77 4.38
-7 7 3 174.73 4.5
-7 7 3 173.93 4.81
7 -7 -2 133.86 3.27
7 -7 -2 135.11 3.56
7 -7 -2 130.5 3.82
7 -7 -2 133.24 3.33
7 -7 -2 135.71 3.36
-7 7 2 136.94 4.06
-7 7 2 133.6 3.38
-7 7 2 138.61 3.61
-7 7 2 137.64 3.79
-7 7 2 140 3.96
7 -7 -1 169.16 4.23
7 -7 -1 181.42 4.45
7 -7 -1 176.51 4.37
7 -7 -1 173.17 4.81
7 -7 -1 171.97 4.18
-7 7 1 175.1 4.12
-7 7 1 172.85 4.56
-7 7 1 173.5 4.36
-7 7 1 165.19 4.83
-7 7 1 169.66 4.66
7 -7 0 39.73 1.72
7 -7 0 37.69 1.61
7 -7 0 38.85 1.75
7 -7 0 37.82 1.88
7 -7 0 39.71 1.21
7 -7 0 37.64 1.64
-7 7 0 36.44 2.01
-7 7 0 36.92 1.53
-7 7 0 38.54 1.9
-7 7 0 36.31 1.84
7 -7 1 119.64 3.32
7 -7 1 116.44 3.43
7 -7 1 114.66 3.73
7 -7 1 117.38 3.57
7 -7 1 115.27 2.87
7 -7 1 116.8 3.24
7 -7 1 112.64 3.42
-7 7 -1 121.09 3.27
-7 7 -1 122.97 3.76
-7 7 -1 116.73 3.67
7 -7 2 137.03 4.32
7 -7 2 134.78 3.45
7 -7 2 138.8 3.99
7 -7 2 135.83 3.84
7 -7 2 140.3 4.03
7 -7 2 136.92 4.11
7 -7 2 137.18 3.72
-7 7 -2 141.61 3.69
-7 7 -2 132.07 4.12
-7 7 -2 142.11 4.29
7 -7 3 73.07 2.92
7 -7 3 61.1 2.62
7 -7 3 69.04 2.48
7 -7 3 73.52 2.8
7 -7 3 59.14 2.42
7 -7 3 72.08 2.35
7 -7 3 70.06 2.68
-7 7 -3 72.59 2.88
-7 7 -3 73.83 3.01
-7 7 -3 74.35 2.49
7 -7 4 81.54 3.13
7 -7 4 80.65 3.08
7 -7 4 75.1 2.8
7 -7 4 75.12 2.74
7 -7 4 73.33 2.92
7 -7 4 79.5 3.21
7 -7 4 75.6 2.65
-7 7 -4 79.59 3.07
-7 7 -4 80.53 2.68
-7 7 -4 81.76 3.36
-7 7 -4 64.88 2.91
-7 7 -4 79.56 2.65
7 -7 5 23.56 1.9
7 -7 5 23.84 1.9
7 -7 5 24.2 1.74
7 -7 5 23.02 2.08
7 -7 5 21.59 2.04
7 -7 5 20.83 1.98
-7 7 -5 20.82 1.49
-7 7 -5 21.66 2.08
-7 7 -5 22.02 1.63
7 -7 6 39.06 2.78
7 -7 6 36.95 2.61
7 -7 6 41.8 2.77
7 -7 6 36.89 2.3
7 -7 6 37.55 2.64
7 -7 6 37.27 2.42
7 -7 6 38.43 2.38
-7 7 -6 37.51 2.03
-7 7 -6 35.02 2.47
-7 7 -6 34.69 1.95
7 -7 7 13.95 1.85
7 -7 7 12.56 1.81
7 -7 7 12.03 1.83
7 -7 7 14.52 2.01
7 -7 7 15.41 2.04
7 -7 7 15.13 1.77
7 -7 7 15.1 2.23
-7 7 -7 14.83 1.8
-7 7 -7 15.69 2.1
-7 7 -7 14.6 1.6
7 -7 8 27.47 2.87
7 -7 8 25.82 3.08
7 -7 8 26.45 3.28
7 -7 8 28.55 3.12
7 -7 8 29.14 2.71
7 -7 8 25.45 2.71
7 -7 8 23.05 2.68
-7 7 -8 24.8 3.31
-7 7 -8 26.11 2.25
-7 7 -8 25.18 2.26
-7 7 -8 24.37 2.86
7 -7 9 13.4 2.23
7 -7 9 13.38 2.23
7 -7 9 13.7 2.3
7 -7 9 11.95 2.61
7 -7 9 12.82 2.24
-7 7 -9 10.67 1.67
-7 7 -9 6.12 1.69
7 -7 10 2.4 2.35
7 -7 10 -0.5 2.34
7 -7 10 -1.5 2.53
7 -7 10 1.89 2.29
-8 8 11 9.35 2.56
-8 8 11 8.17 2.36
-8 8 10 1.95 1.88
-8 8 10 2.35 0.96
-8 8 10 0.96 1.21
-8 8 10 4.27 1.71
-8 8 9 -0.03 0.86
-8 8 9 2.24 1.19
-8 8 9 1.11 1.48
-8 8 9 1.73 1.44
-8 8 9 0.59 0.94
-8 8 8 21.32 2.3
-8 8 8 19.83 1.33
-8 8 8 20.27 1.47
-8 8 8 25.09 1.89
-8 8 7 1.8 1.1
-8 8 7 1.6 0.94
-8 8 7 2.7 0.6
-8 8 7 0.97 0.69
8 -8 -6 39.57 1.54
-8 8 6 43.15 1.57
-8 8 6 40.71 1.73
-8 8 6 42.49 2.31
-8 8 6 39.71 1.99
8 -8 -5 8.67 1.21
-8 8 5 8.4 0.94
-8 8 5 10.41 1.22
-8 8 5 9.12 1.05
8 -8 -4 27.19 1.67
8 -8 -4 25.82 1.5
-8 8 4 23.77 1.25
-8 8 4 24.39 1.37
-8 8 4 28.28 1.69
-8 8 4 21.03 1.71
8 -8 -3 79.65 2.4
8 -8 -3 76.39 2.54
8 -8 -3 79.68 2.76
-8 8 3 80.57 2.78
-8 8 3 76.13 2.94
-8 8 3 77.51 2.53
-8 8 3 79 2.38
-8 8 3 81.8 3
8 -8 -2 2.25 0.68
8 -8 -2 3.16 0.64
8 -8 -2 2.27 0.71
8 -8 -2 2.63 0.78
8 -8 -2 3.18 0.62
-8 8 2 4.16 0.97
-8 8 2 3.87 0.97
-8 8 2 4.26 0.95
-8 8 2 3.76 0.77
-8 8 2 2.7 0.61
8 -8 -1 38.12 1.66
8 -8 -1 37.75 1.68
8 -8 -1 38.03 1.97
8 -8 -1 40.36 1.8
8 -8 -1 39.32 1.85
-8 8 1 35.36 1.99
-8 8 1 37.33 1.74
-8 8 1 35.32 1.54
-8 8 1 37.58 2.03
-8 8 1 34.42 2.13
8 -8 0 117.56 3.34
8 -8 0 116.04 3.33
8 -8 0 114.78 3.5
8 -8 0 114.67 3.45
8 -8 0 115.49 2.69
8 -8 0 113.43 3.78
-8 8 0 115.27 3.25
-8 8 0 115.25 3.73
-8 8 0 117.06 3.79
8 -8 1 189.73 4.73
8 -8 1 182.16 5.15
8 -8 1 186.63 5.02
8 -8 1 183.84 5.41
8 -8 1 187.94 5.01
8 -8 1 178.45 4.8
8 -8 1 185.93 4.23
-8 8 -1 156.8 4.87
-8 8 -1 180.31 4.47
-8 8 -1 186.62 5.16
8 -8 2 52.98 2.38
8 -8 2 50.26 1.84
8 -8 2 52.72 2.31
8 -8 2 53.81 2.27
8 -8 2 55.41 2.44
8 -8 2 48.96 2.5
8 -8 2 54.54 2.26
-8 8 -2 54.75 2.59
-8 8 -2 45.26 2.5
-8 8 -2 55.15 2.11
8 -8 3 18.97 1.79
8 -8 3 15.62 1.31
8 -8 3 19.86 1.63
8 -8 3 19.64 1.82
8 -8 3 18.51 1.62
8 -8 3 17.91 1.66
8 -8 3 19.76 1.68
-8 8 -3 18.84 2.04
-8 8 -3 21.96 2
-8 8 -3 20.04 1.43
8 -8 4 15.15 1.72
8 -8 4 15.73 1.87
8 -8 4 14.24 1.7
8 -8 4 15.91 1.39
8 -8 4 17.44 1.79
-8 8 -4 15.81 1.99
-8 8 -4 16.96 1.87
-8 8 -4 16.92 1.73
-8 8 -4 17 1.45
-8 8 -4 15.62 2.03
8 -8 5 35.82 2.58
8 -8 5 34.42 2.35
8 -8 5 33.34 2.31
8 -8 5 34.88 2.05
8 -8 5 37.5 2.55
-8 8 -5 35.27 1.94
-8 8 -5 34.28 2.11
-8 8 -5 36.5 2.64
8 -8 6 82.08 3.86
8 -8 6 82.51 3.81
8 -8 6 82.56 3.63
8 -8 6 75.5 3.74
8 -8 6 76.66 3.38
8 -8 6 73.67 3.21
8 -8 6 75.93 3.86
-8 8 -6 71.85 3.55
-8 8 -6 78.38 2.95
-8 8 -6 76.94 2.96
8 -8 7 9.02 1.98
8 -8 7 4.43 1.76
8 -8 7 6.18 1.43
8 -8 7 8.37 1.99
8 -8 7 6.99 1.84
8 -8 7 8.83 1.69
8 -8 7 7.95 1.64
-8 8 -7 9.66 1.59
-8 8 -7 4.69 1.98
-8 8 -7 5.66 1.87
-8 8 -7 6.6 1.3
8 -8 8 3.42 1.82
8 -8 8 5.58 1.97
8 -8 8 5.55 1.92
8 -8 8 3.85 2.17
8 -8 8 3.04 1.85
8 -8 8 3.96 1.86
-8 8 -8 3.7 1.38
-8 8 -8 4.3 1.59
8 -8 9 -0.13 1.99
8 -8 9 2.93 2.26
8 -8 9 1.48 2.1
8 -8 9 4.04 2.68
8 -8 9 -0.66 2.02
8 -8 10 9.02 2.69
8 -8 10 1.1 2.46
8 -8 10 10.34 3.12
8 -8 10 5.11 2.65
-9 9 10 -1.92 1.74
-9 9 10 -4 2.01
-9 9 9 15.16 1.72
-9 9 9 10.21 1.43
-9 9 9 17.27 2.22
-9 9 8 11.5 1.38
-9 9 8 15.93 2.21
-9 9 8 19.32 2.22
-9 9 7 1.56 0.78
-9 9 7 2.4 0.73
-9 9 7 1.06 1.25
-9 9 7 2.68 1.19
9 -9 -6 5.5 0.99
9 -9 -6 5.69 0.96
-9 9 6 5.1 0.92
-9 9 6 4.21 1.22
-9 9 6 4.73 1.24
-9 9 6 4.97 0.84
9 -9 -5 6.06 1.04
9 -9 -5 4.17 0.99
-9 9 5 4.84 1.19
-9 9 5 6.77 0.92
-9 9 5 4.54 0.79
9 -9 -4 37.71 1.91
9 -9 -4 36.14 1.93
-9 9 4 38.68 1.79
-9 9 4 36.73 2.19
-9 9 4 39.46 1.71
9 -9 -3 2.39 0.51
9 -9 -3 3.29 0.55
9 -9 -3 4.4 0.9
9 -9 -3 2.98 0.91
-9 9 3 3.65 1.06
-9 9 3 3.49 0.69
-9 9 3 3 0.79
-9 9 3 3.38 1.17
9 -9 -2 75.59 2.41
9 -9 -2 73.72 2.57
9 -9 -2 78.02 2.9
9 -9 -2 75.91 2.37
9 -9 -2 73.52 2.73
-9 9 2 68.42 2.93
-9 9 2 78.95 2.51
-9 9 2 75.99 2.64
-9 9 2 76.47 3.08
9 -9 -1 52.61 2.42
9 -9 -1 48.41 2.18
9 -9 -1 54.42 2.1
9 -9 -1 52.14 2.35
9 -9 -1 52.5 2.11
-9 9 1 60.18 2.76
-9 9 1 59.38 2.74
-9 9 1 60.22 2.23
9 -9 0 7.5 1.22
9 -9 0 7.66 1.05
9 -9 0 9.45 1.18
9 -9 0 10.37 1.25
9 -9 0 10.97 1.47
9 -9 0 9.55 0.76
-9 9 0 10.24 1.09
-9 9 0 8.2 1.48
-9 9 0 6.11 1.29
9 -9 1 32.67 1.93
9 -9 1 34.61 1.93
9 -9 1 31.49 1.36
9 -9 1 33.67 1.93
9 -9 1 30.33 2.08
9 -9 1 29.33 2.05
-9 9 -1 34.13 2.31
-9 9 -1 34.25 2.38
-9 9 -1 32.95 1.74
9 -9 2 31.65 2.18
9 -9 2 28.59 1.93
9 -9 2 32.57 2.05
9 -9 2 29.8 1.92
9 -9 2 28.22 1.46
9 -9 2 27.77 1.95
9 -9 2 30.78 2.15
-9 9 -2 27.81 2.33
-9 9 -2 26.52 2.31
-9 9 -2 28.4 1.68
9 -9 3 91.25 2.9
9 -9 3 91.47 3.36
9 -9 3 92.92 3.63
9 -9 3 93.08 3.35
9 -9 3 91.09 3.58
9 -9 3 90.42 3.73
9 -9 3 91.48 3.5
-9 9 -3 95.93 3.78
-9 9 -3 91.2 3.12
-9 9 -3 92.45 3.88
9 -9 4 21.69 2.08
9 -9 4 22.79 2.22
9 -9 4 20.76 1.64
9 -9 4 20.15 2.25
9 -9 4 23.37 2.11
-9 9 -4 24.94 2.53
-9 9 -4 20.46 2.64
-9 9 -4 19.69 2.05
-9 9 -4 20.58 2.48
-9 9 -4 21.54 1.74
9 -9 5 15.67 1.8
9 -9 5 18.13 2.45
9 -9 5 20.06 2.42
9 -9 5 19.5 2.67
9 -9 5 19.64 2.31
-9 9 -5 19.8 2.03
-9 9 -5 17.95 1.78
-9 9 -5 20.97 2.68
9 -9 6 1.62 1.61
9 -9 6 1.82 1.2
9 -9 6 0.79 1.72
9 -9 6 1.38 1.57
9 -9 6 3.05 1.62
9 -9 6 0.63 1.39
9 -9 6 -0.42 1.35
-9 9 -6 0.15 1.08
-9 9 -6 -0.91 1.85
-9 9 -6 -0.82 1.6
-9 9 -6 2.15 1.42
9 -9 7 20.8 2.63
9 -9 7 24.12 3.14
9 -9 7 13.71 2.42
9 -9 7 18.89 2.31
9 -9 7 19.94 2.55
9 -9 7 22.1 2.96
9 -9 7 15.35 2.34
-9 9 -7 17.46 2
-9 9 -7 14.83 2.45
-9 9 -7 19.47 2.3
9 -9 8 17.38 2.83
9 -9 8 14.76 2.21
9 -9 8 15.27 2.48
9 -9 8 17.73 2.71
9 -9 8 11.17 2.81
-9 9 -8 15.35 2.06
-9 9 -8 17.04 2.24
9 -9 9 6.7 2.43
9 -9 9 1.65 2.33
9 -9 9 1.82 2.51
9 -9 9 2.91 2.77
-10 10 10 0.28 2.28
-10 10 10 4.14 2.29
-10 10 9 9.86 2.15
-10 10 9 11.89 1.58
-10 10 9 7.34 1.82
-10 10 8 0.15 1.62
-10 10 8 2.49 1.04
-10 10 8 1.07 1.65
-10 10 8 2.49 1.02
-10 10 7 16.51 1.47
-10 10 7 16.42 1.6
-10 10 7 16.87 2.04
-10 10 7 18.65 2.39
10 -10 -6 13.2 1.72
10 -10 -6 13.82 1.75
10 -10 -6 13.28 1.59
-10 10 6 16.09 2.04
-10 10 6 13.15 1.46
-10 10 6 14.34 1.79
-10 10 6 15.37 1.47
10 -10 -5 23.68 1.85
10 -10 -5 24.29 1.98
10 -10 -5 22.53 1.92
-10 10 5 23.61 2.58
-10 10 5 24.39 1.61
-10 10 5 24.79 1.61
-10 10 5 22.99 2.33
10 -10 -4 33.79 2.06
10 -10 -4 37.71 2.09
-10 10 4 27.09 1.68
-10 10 4 36.3 2.63
-10 10 4 37.61 1.87
-10 10 4 38.05 2.52
10 -10 -3 11.18 1.44
10 -10 -3 10.45 1.5
10 -10 -3 11.16 0.93
10 -10 -3 9.47 0.98
-10 10 3 12.13 1.82
-10 10 3 9.99 1.29
-10 10 3 10.81 1.61
-10 10 3 11.76 1.27
10 -10 -2 36.6 2.15
10 -10 -2 36.87 1.77
10 -10 -2 37.03 2.07
10 -10 -2 35.29 1.71
10 -10 -2 34.32 2.16
-10 10 2 34.53 2.46
-10 10 2 36.55 1.84
-10 10 2 36.25 2.51
10 -10 -1 12.76 1.77
10 -10 -1 18.23 1.76
10 -10 -1 17.01 1.46
10 -10 -1 16.53 1.6
10 -10 -1 11.94 1.61
-10 10 1 18.42 2.16
-10 10 1 16.93 1.43
-10 10 1 17.94 2.15
10 -10 0 43.1 2.3
10 -10 0 46.62 2.6
10 -10 0 41.15 1.4
10 -10 0 45.1 2.2
10 -10 0 41.59 2.44
10 -10 0 43.01 2.23
-10 10 0 35.41 2.55
-10 10 0 38.21 2.7
-10 10 0 39.9 1.95
10 -10 1 41.51 2.38
10 -10 1 43.97 2.57
10 -10 1 40.92 2.28
10 -10 1 45.08 1.63
10 -10 1 43.58 2.6
10 -10 1 44.59 2.4
-10 10 -1 44.7 2.83
-10 10 -1 39.92 2.01
10 -10 2 17.52 1.34
10 -10 2 15.93 2.19
10 -10 2 15.48 1.98
10 -10 2 15.99 1.83
10 -10 2 13.68 1.92
10 -10 2 16.28 1.93
10 -10 2 13.03 1.61
-10 10 -2 15.53 2.1
-10 10 -2 16.19 1.56
10 -10 3 31.07 2.57
10 -10 3 23.47 2.24
10 -10 3 28.29 2.28
10 -10 3 31.36 1.79
10 -10 3 31.37 2.43
-10 10 -3 40.31 3.05
-10 10 -3 34.85 2.13
-10 10 -3 38.86 2.95
10 -10 4 3.45 1.05
10 -10 4 2.53 1.43
10 -10 4 3.89 1.49
10 -10 4 2.99 1.43
-10 10 -4 2.81 1.57
-10 10 -4 0.35 1.8
-10 10 -4 3.08 1.44
-10 10 -4 4.57 1.13
-10 10 -4 0.97 1.65
10 -10 5 41.79 3.59
10 -10 5 40.87 2.98
10 -10 5 40.06 3.12
10 -10 5 43.87 2.48
-10 10 -5 39.24 3.43
-10 10 -5 43.44 2.52
-10 10 -5 43.03 2.83
-10 10 -5 40.16 3.61
10 -10 6 4.43 1.94
10 -10 6 6.59 1.88
10 -10 6 7.93 2.07
10 -10 6 7.13 1.61
10 -10 6 2.92 1.91
10 -10 6 7.18 2.08
10 -10 6 5.02 1.89
-10 10 -6 5.31 2.12
-10 10 -6 5.76 2.34
-10 10 -6 6.79 1.55
-10 10 -6 1.9 1.65
10 -10 7 18.62 2.81
10 -10 7 17.34 2.78
10 -10 7 23.39 2.82
10 -10 7 21.28 2.48
10 -10 7 15.75 3.05
-10 10 -7 20.41 2.48
-10 10 -7 22.15 2.85
10 -10 8 9.81 2.64
10 -10 8 9.32 2.26
10 -10 8 10.61 2.85
10 -10 8 9.73 2.51
10 -10 8 12.93 3.34
-11 11 9 3.42 2.27
-11 11 8 14.31 1.46
-11 11 8 13.55 1.64
-11 11 8 14.74 2.22
-11 11 8 11.15 1.34
-11 11 8 12.92 2.31
-11 11 7 34.8 1.98
-11 11 7 40.06 3.15
-11 11 7 28.49 2.24
-11 11 7 34.32 3.23
-11 11 7 35.55 2.08
11 -11 -6 5.96 1.29
11 -11 -6 6.13 1.45
11 -11 -6 6.17 1.43
-11 11 6 6.36 1.62
-11 11 6 8.58 2.21
-11 11 6 6 1.13
-11 11 6 7.94 1.18
-11 11 6 10.11 1.89
11 -11 -5 1.57 1.32
11 -11 -5 3.56 1.3
11 -11 -5 7.97 1.47
-11 11 5 6.58 1.76
-11 11 5 6.44 1.12
-11 11 5 5.53 1.11
-11 11 5 7.47 1.98
11 -11 -4 5.77 1.34
11 -11 -4 3.91 1.15
11 -11 -4 1.43 1.18
-11 11 4 3.6 1.15
-11 11 4 4.72 1.71
-11 11 4 3.73 0.99
-11 11 4 5.88 1.72
11 -11 -3 67.7 2.19
11 -11 -3 69.05 3.04
11 -11 -3 68.27 2.15
11 -11 -3 71.06 3.03
-11 11 3 64.02 3.34
-11 11 3 63.12 3.42
-11 11 3 67.69 2.63
11 -11 -2 49.17 2.64
11 -11 -2 49.86 2.69
11 -11 -2 47.02 2.17
11 -11 -2 50.61 2.13
-11 11 2 38.88 2.11
-11 11 2 41.69 2.9
-11 11 2 44.39 2.94
11 -11 -1 -1.52 1.13
11 -11 -1 0.42 0.82
11 -11 -1 1.61 1.11
11 -11 -1 -0.53 1
11 -11 -1 0.53 0.99
-11 11 1 0.94 1.33
-11 11 1 -0.3 1.4
-11 11 1 0.41 0.78
11 -11 0 5.57 1.14
11 -11 0 4.45 1.21
11 -11 0 6.52 0.83
11 -11 0 4.08 1.35
11 -11 0 6.61 1.27
11 -11 0 6.28 1.45
-11 11 0 6.74 1.83
-11 11 0 4.61 1.12
-11 11 0 7.13 1.85
11 -11 1 12.84 1.14
11 -11 1 12.99 1.68
11 -11 1 13.38 1.78
11 -11 1 11.66 1.64
11 -11 1 13.14 1.96
-11 11 -1 15.15 1.63
-11 11 -1 11.4 1.95
11 -11 2 32.86 2.69
11 -11 2 29.42 2.5
11 -11 2 32.68 2.45
11 -11 2 31.49 1.68
-11 11 -2 31.84 2.1
-11 11 -2 32.78 3.09
11 -11 3 16.54 1.62
11 -11 3 18.95 2.25
11 -11 3 18.09 2.19
11 -11 3 17.28 2.53
11 -11 3 19.56 2.39
11 -11 3 17.37 2.16
-11 11 -3 17.56 2.55
-11 11 -3 19.76 2.49
-11 11 -3 20.53 1.97
-11 11 -3 20.28 2.52
11 -11 4 11.63 2.23
11 -11 4 8.6 2.01
11 -11 4 13.67 1.56
11 -11 4 11.99 1.92
11 -11 4 13.84 1.97
11 -11 4 16.16 2.41
11 -11 4 14.36 2.3
-11 11 -4 12.56 1.65
-11 11 -4 12.08 2.67
-11 11 -4 14.77 2.53
-11 11 -4 15.44 2.43
11 -11 5 10.4 1.72
11 -11 5 10.91 2.4
11 -11 5 11.38 2.12
11 -11 5 9.16 2.6
11 -11 5 7.81 2.19
-11 11 -5 9.15 2.54
-11 11 -5 7.06 1.54
11 -11 6 -0.42 2
11 -11 6 3.18 2
11 -11 6 7.74 2.14
11 -11 6 2.81 2.68
11 -11 6 6.78 1.83
-11 11 -6 5.33 1.73
11 -11 7 8.44 2.25
11 -11 7 6.12 2.73
11 -11 7 3.01 2.33
11 -11 7 10.8 2.78
11 -11 7 2.59 3.04
-11 11 -7 7.94 2.29
-11 11 -7 7.56 2.49
11 -11 8 3.33 2.77
11 -11 8 4.53 2.53
-12 12 8 2.67 1.2
-12 12 8 -3.07 3.13
-12 12 8 9.4 2.38
-12 12 8 1.73 2.34
-12 12 8 1.67 1.39
12 -12 -7 4.3 1.69
-12 12 7 8.14 2.67
-12 12 7 5.44 2.07
-12 12 7 4.24 1.3
-12 12 7 4.96 2.29
-12 12 7 0.9 1.55
12 -12 -6 10.03 1.92
12 -12 -6 10.89 1.86
-12 12 6 11.23 1.49
-12 12 6 10.33 2.29
-12 12 6 11.82 1.85
-12 12 6 11.67 2.09
-12 12 6 10.11 2.57
12 -12 -5 50.24 3.14
12 -12 -5 51.49 2.97
12 -12 -5 44.01 2.97
-12 12 5 51.69 2.54
-12 12 5 50.71 3.82
-12 12 5 51.6 3.7
12 -12 -4 9.13 1.78
12 -12 -4 8.24 1.69
12 -12 -4 7.41 1.79
-12 12 4 8.44 2.23
-12 12 4 7.69 2.16
-12 12 4 6.13 1.25
12 -12 -3 11.84 1.63
12 -12 -3 14.26 1.91
12 -12 -3 14.75 1.45
12 -12 -3 12.49 1.92
12 -12 -3 14.28 1.29
-12 12 3 14.07 2.29
-12 12 3 14.51 1.81
-12 12 3 13.71 2.15
12 -12 -2 8.38 1.36
12 -12 -2 9.46 1.16
12 -12 -2 8.19 1.79
12 -12 -2 7.91 1.72
-12 12 2 8.12 2.01
-12 12 2 8.99 1.39
-12 12 2 9.58 2.04
12 -12 -1 69.74 3.02
12 -12 -1 69.6 3.46
12 -12 -1 70.35 2.9
-12 12 1 65.19 3.86
-12 12 1 73 4
-12 12 1 67.88 2.97
12 -12 0 48.86 2.79
12 -12 0 47.79 2.69
12 -12 0 42.5 2.95
-12 12 0 42.67 3.56
-12 12 0 45.46 3.64
-12 12 0 46.6 2.51
12 -12 1 6.23 1.43
12 -12 1 10.22 1.03
12 -12 1 8.15 1.58
12 -12 1 9.54 1.96
-12 12 -1 11.17 2.4
-12 12 -1 11.05 1.67
12 -12 2 15.17 2.37
12 -12 2 14.36 2.03
12 -12 2 12.79 2.14
12 -12 2 20.52 2.47
12 -12 2 15.48 1.61
-12 12 -2 13.12 2.42
-12 12 -2 19.62 2.15
-12 12 -2 16.31 2.71
-12 12 -2 12.39 2.39
12 -12 3 4.75 1.85
12 -12 3 4.31 2.06
12 -12 3 3.92 1.75
12 -12 3 6.71 1.79
12 -12 3 4.61 1.24
12 -12 3 6.04 1.94
12 -12 3 3.69 2.06
-12 12 -3 -0.52 2.13
-12 12 -3 6.81 1.36
-12 12 -3 2.14 2.09
-12 12 -3 5.82 2.34
12 -12 4 17.26 2.27
12 -12 4 18.03 2.24
12 -12 4 18.74 2.71
12 -12 4 15.37 2.34
12 -12 4 17.11 2.97
-12 12 -4 14.99 2.74
-12 12 -4 9.06 2.75
-12 12 -4 19.41 2.16
-12 12 -4 16.41 2.49
12 -12 5 4.95 2.17
12 -12 5 3.23 2.42
12 -12 5 9.36 1.83
12 -12 5 5.88 2.43
12 -12 5 8.32 2.16
-12 12 -5 9.02 2.44
-12 12 -5 6.87 1.85
-12 12 -5 6.79 2.77
12 -12 6 5.5 2.39
12 -12 6 5.48 1.92
12 -12 6 5.16 2.47
12 -12 6 5.34 2.63
-12 12 -6 2.26 2.09
-12 12 -6 5.86 2.61
12 -12 7 10.37 3.55
12 -12 7 2.88 3.02
12 -12 7 6.07 3.05
12 -12 7 11.01 2.69
13 -13 -7 4.44 2
-13 13 7 6.02 2.52
-13 13 7 2.32 2.99
-13 13 7 5.56 1.5
-13 13 7 7.44 3.21
13 -13 -6 17.93 2.46
-13 13 6 16.53 3.18
-13 13 6 18.95 2.74
-13 13 6 19.06 3.3
-13 13 6 22.68 2.46
13 -13 -5 6.89 1.94
-13 13 5 8.67 2.7
-13 13 5 6.47 1.99
-13 13 5 8.8 1.55
-13 13 5 8.35 2.75
13 -13 -4 5.22 1.79
-13 13 4 5.57 2.44
-13 13 4 3.07 1.38
-13 13 4 5.75 2.48
13 -13 -3 21.03 1.61
13 -13 -3 21.57 1.8
13 -13 -3 20.8 2.81
-13 13 3 26.39 2.26
-13 13 3 30.79 3.25
-13 13 3 20.69 2.82
13 -13 -2 21.29 1.97
13 -13 -2 21.26 2.58
13 -13 -2 24.66 2.86
13 -13 -2 20.03 2.35
-13 13 2 23.04 2.95
-13 13 2 18 2.13
-13 13 2 25.42 3.59
13 -13 -1 39.97 3.14
13 -13 -1 42.98 2.5
13 -13 -1 45.46 2.97
13 -13 -1 47.66 3.49
13 -13 -1 34.98 3.64
-13 13 1 42 3.96
-13 13 1 46.85 2.74
-13 13 1 41.3 3.81
13 -13 0 13.5 2.22
13 -13 0 7.71 2.16
13 -13 0 13.54 1.96
-13 13 0 9.4 2.86
-13 13 0 12.75 2.74
-13 13 0 11.75 1.66
13 -13 1 13.62 1.49
13 -13 1 12.58 2.06
13 -13 1 16.8 2.68
13 -13 1 14.03 2.56
13 -13 1 14.41 2.17
-13 13 -1 16.1 2.03
-13 13 -1 13.08 2.69
-13 13 -1 15.4 2.86
13 -13 2 14.02 2.29
13 -13 2 11.39 1.42
13 -13 2 14.42 2.49
13 -13 2 12.13 2.21
-13 13 -2 10.23 1.77
-13 13 -2 12.17 2.73
-13 13 -2 9.34 2.72
13 -13 3 31.82 3.37
13 -13 3 36.68 3.96
13 -13 3 24.17 2.39
-13 13 -3 17.19 2.91
-13 13 -3 27.77 2.92
13 -13 4 27.08 3.86
13 -13 4 18.8 3.05
13 -13 4 25.96 3.51
13 -13 4 26.49 2.76
-13 13 -4 15.79 3.41
-13 13 -4 24.76 3.37
-13 13 -4 26.42 3.16
13 -13 5 -0.02 2.56
13 -13 5 2.17 2.5
13 -13 5 -4.31 2.68
13 -13 5 3.5 1.89
-13 13 -5 4.86 2.85
-13 13 -5 5.1 2.31
13 -13 6 -0.11 2.36
13 -13 6 1.46 2.82
13 -13 6 -2.83 3.31
-14 14 6 7.91 2.03
-14 14 6 1.44 2.7
-14 14 5 3.01 1.7
14 -14 -4 24.88 3.03
14 -14 -4 16.61 2.71
-14 14 4 22.08 3.5
-14 14 4 30.4 2.78
14 -14 -3 19.4 2.91
14 -14 -3 11.46 2.54
-14 14 3 14.55 2.33
-14 14 3 12.25 1.83
-14 14 3 10.88 3.01
14 -14 -2 1.91 2
14 -14 -2 2.67 1.43
14 -14 -2 1.5 2.28
14 -14 -2 2.06 1.73
-14 14 2 3.66 1.64
-14 14 2 5.22 2.61
-14 14 2 4.7 2.72
14 -14 -1 4.33 1.57
14 -14 -1 3.35 2.48
14 -14 -1 5.86 2.12
-14 14 1 3.14 2.75
-14 14 1 3.18 1.62
-14 14 1 3.05 2.46
14 -14 0 11.21 2.14
14 -14 0 12.29 2.41
14 -14 0 9.84 2
-14 14 0 8.43 2.74
-14 14 0 11.97 1.95
14 -14 1 45.99 2.16
14 -14 1 43.01 4.15
14 -14 1 45.84 3.72
14 -14 1 46.8 4.07
-14 14 -1 50.55 3.44
-14 14 -1 37.19 4.68
14 -14 2 17.6 2.71
14 -14 2 21.57 2.35
14 -14 2 19.77 3.11
-14 14 -2 17.98 3.55
-14 14 -2 15.3 2.39
14 -14 3 0.74 2.27
14 -14 3 -0.28 1.73
14 -14 3 -0.24 2.77
-14 14 -3 2.63 1.99
-14 14 -3 4.31 3.43
14 -14 4 0.74 2.14
14 -14 4 2 3.07
14 -14 4 -5.57 2.45
-14 14 -4 2.99 2.46
-15 15 4 7.7 2.11
-15 15 3 3.62 1.9
15 -15 -2 9.5 2.05
15 -15 -2 8.96 2.94
-15 15 2 11.09 2.15
15 -15 -1 7.45 3.21
15 -15 -1 3.34 2.03
-15 15 1 4.28 2.07
15 -15 0 7.35 2.16
15 -15 0 8.43 2.85
15 -15 0 6.59 3.23
-15 15 0 5.03 2.24
15 -15 1 0.04 2.28
15 -15 1 0.88 2.72
-15 15 -1 2.22 2.09
15 -15 2 9.75 3.2
15 -15 2 6.76 2.97
-15 15 -2 10.09 2.47
-17 15 -1 3.52 2.33
17 -15 1 2.32 2.65
17 -15 1 12.03 3.4
-17 15 0 6.89 2.38
17 -15 0 1.62 3.06
17 -15 0 2.42 2.36
-17 15 1 1.47 2.1
17 -15 -1 8.78 3.67
17 -15 -1 -0.62 2.09
-17 15 2 7.52 2.18
17 -15 -2 3.12 2.14
17 -15 -2 10.25 3.2
-17 15 3 7.72 2.38
-16 14 -4 6.82 2.97
16 -14 4 11.32 2.68
16 -14 4 8.94 3.04
16 -14 4 10.39 3.41
-16 14 -3 13.49 2.71
-16 14 -3 8.17 3.61
16 -14 3 8.57 2.06
16 -14 3 3.18 2.67
16 -14 3 15.44 3.51
-16 14 -2 4.25 3.36
-16 14 -2 4.21 1.96
16 -14 2 1.3 2.22
16 -14 2 4.16 1.54
16 -14 2 2.99 2.24
-16 14 -1 4.92 1.81
-16 14 -1 2.24 3.06
16 -14 1 6.77 2.14
16 -14 1 4.85 1.31
16 -14 1 7.47 2.63
-16 14 0 12.37 2.01
16 -14 0 16.89 2.66
16 -14 0 15.84 2.22
16 -14 0 17.08 3.07
-16 14 1 5.12 1.75
16 -14 -1 2.5 1.7
16 -14 -1 -1.77 2.31
16 -14 -1 0.36 2.19
16 -14 -1 5.7 2.62
-16 14 2 9.48 1.84
16 -14 -2 10.01 2.41
16 -14 -2 13.84 2.2
16 -14 -2 14.2 1.86
16 -14 -2 13.6 2.86
-16 14 3 8.96 1.86
16 -14 -3 8.07 2.63
16 -14 -3 4.69 2.49
16 -14 -3 8.5 1.48
-16 14 4 1.32 1.59
16 -14 -4 4.81 2.59
-16 14 5 0.81 1.77
-15 13 -5 4.47 2.83
-15 13 -5 8.59 2.74
15 -13 5 6.52 2.3
15 -13 5 9.22 2.79
15 -13 5 3.72 2.83
15 -13 5 9.15 3
-15 13 -4 4.46 2.18
-15 13 -4 11.08 3.01
15 -13 4 9.87 2.76
15 -13 4 4.24 2.35
15 -13 4 6.86 1.97
-15 13 -3 15.64 2.25
-15 13 -3 3.92 2.82
15 -13 3 11.65 1.81
15 -13 3 11.64 2.76
15 -13 3 11.68 2.3
-15 13 -2 10.8 2
-15 13 -2 8.7 3.08
15 -13 2 12.6 2.22
15 -13 2 10.74 1.43
15 -13 2 10.71 2.22
-15 13 -1 13.07 1.96
-15 13 -1 5.61 2.6
15 -13 1 10.11 2.06
15 -13 1 10.48 2.12
15 -13 1 3.35 2.31
15 -13 1 11.28 1.25
15 -13 1 11.73 2.56
-15 13 0 7.34 1.64
-15 13 0 5.72 2.74
15 -13 0 10.1 1.82
15 -13 0 8.31 1.96
15 -13 0 9.34 2.3
15 -13 0 12.28 2.38
-15 13 1 7.45 2.43
-15 13 1 7.8 1.57
15 -13 -1 4.07 2.05
15 -13 -1 6.22 1.9
15 -13 -1 6.6 1.51
-15 13 2 11.29 1.65
-15 13 2 14.77 2.86
15 -13 -2 12.06 1.49
15 -13 -2 11.89 1.79
15 -13 -2 10.26 2.17
15 -13 -2 9.9 2.22
-15 13 3 4.23 1.42
-15 13 3 0.14 2.53
-15 13 3 2.69 2.5
15 -13 -3 1.77 1.86
15 -13 -3 3 1.24
15 -13 -3 -0.74 1.94
15 -13 -3 1.75 1.08
-15 13 4 32.75 4.22
-15 13 4 33.33 4.14
-15 13 4 26.72 2.55
15 -13 -4 25.52 3.09
-15 13 5 3.7 2.72
-15 13 5 -0.28 2.89
-15 13 5 2.61 1.33
15 -13 -5 -1.32 1.76
15 -13 -5 5.75 2
-15 13 6 13.64 1.85
-15 13 6 12.23 2.45
-15 13 7 6.06 1.54
-15 13 7 6.23 2.67
-14 12 -6 2.22 2.28
14 -12 6 0.53 2.6
14 -12 6 5.12 2.61
14 -12 6 4.41 2.2
14 -12 6 5.66 2.7
-14 12 -5 8.25 1.98
-14 12 -5 10.06 2.67
14 -12 5 3.19 1.75
14 -12 5 9.29 2.46
14 -12 5 2.27 2.15
14 -12 5 5.39 2.34
-14 12 -4 18.79 2.75
-14 12 -4 16.7 3
-14 12 -4 21.08 2.21
14 -12 4 23.25 3.15
14 -12 4 22.21 2.9
14 -12 4 17.69 3.04
14 -12 4 19.75 2.45
14 -12 4 14.99 2.77
-14 12 -3 40.13 2.85
-14 12 -3 33.11 4.26
-14 12 -3 30.49 4.04
-14 12 -3 39.86 4.37
14 -12 3 31.57 3.25
14 -12 3 38.3 2.36
14 -12 3 35.92 3.21
14 -12 3 30.38 3.76
14 -12 3 38.39 3.74
-14 12 -2 7.1 1.57
-14 12 -2 7.07 2.5
-14 12 -2 5.38 2.24
14 -12 2 2.27 1.77
14 -12 2 7.4 2.1
14 -12 2 2.83 1.61
14 -12 2 6.29 2.01
14 -12 2 5.4 1.11
14 -12 2 5.05 2.06
-14 12 -1 12.01 2.47
-14 12 -1 10.03 2.35
-14 12 -1 8.97 1.58
14 -12 1 10.34 1.07
14 -12 1 11.08 1.82
14 -12 1 12.57 2.07
14 -12 1 11.61 1.92
14 -12 1 11.8 2.21
14 -12 1 11.87 2.11
-14 12 0 9.71 2.31
-14 12 0 11.86 2.43
-14 12 0 9.81 1.48
14 -12 0 11.51 1.13
14 -12 0 8.25 1.87
14 -12 0 8.29 1.81
14 -12 0 7.7 1.83
14 -12 0 5.93 1.51
-14 12 1 62.52 2.86
-14 12 1 58.03 4.04
-14 12 1 61.69 3.94
14 -12 -1 57.72 3.44
14 -12 -1 68.15 3.08
14 -12 -1 60.39 3.22
14 -12 -1 61.92 2.83
-14 12 2 40.62 3.52
-14 12 2 42 2.45
-14 12 2 42.33 3.62
14 -12 -2 42.92 2.16
14 -12 -2 42.76 2.84
14 -12 -2 35.88 2.4
14 -12 -2 43.25 2.93
-14 12 3 4.03 2.06
-14 12 3 4.6 2.06
14 -12 -3 3.04 0.89
14 -12 -3 2.42 1.53
14 -12 -3 5.15 1.07
14 -12 -3 3.37 1.42
-14 12 4 10.19 2.28
-14 12 4 10.15 1.42
-14 12 4 5.81 2.29
14 -12 -4 12.94 1.87
14 -12 -4 7.05 1.75
-14 12 5 4.28 2.06
-14 12 5 9.07 2.43
-14 12 5 3.25 1.21
14 -12 -5 2.54 1.52
14 -12 -5 1.89 1.77
14 -12 -5 2.88 1.49
-14 12 6 5.79 2.51
-14 12 6 8.14 2.07
-14 12 6 6.7 1.42
-14 12 6 6.43 2.28
14 -12 -6 3.24 1.9
14 -12 -6 8.9 1.79
14 -12 -6 5.13 1.71
-14 12 7 1.68 2.73
-14 12 7 1.56 1.34
-14 12 7 3.61 2.48
-14 12 7 3.84 2.11
14 -12 -7 -0.86 1.81
-14 12 8 6.31 1.45
-14 12 8 4.95 2.48
-14 12 8 8.76 2.62
13 -11 7 3.22 2.81
13 -11 7 6.42 2.59
13 -11 7 -1.56 3.09
13 -11 7 3.55 3.02
13 -11 7 5.96 2.38
-13 11 -6 21.56 2.41
13 -11 6 20.41 3.28
13 -11 6 23.59 3.31
13 -11 6 23.4 2.92
13 -11 6 21.3 3.2
13 -11 6 24.45 3.08
-13 11 -5 8.53 2.52
-13 11 -5 8.04 1.68
13 -11 5 8.07 2.27
13 -11 5 9.43 2.08
13 -11 5 10.69 2.28
13 -11 5 7.97 2.21
13 -11 5 12.33 1.86
-13 11 -4 -0.85 1.28
-13 11 -4 4.52 2.23
-13 11 -4 -0.43 2.15
-13 11 -4 -0.87 1.94
13 -11 4 -0.91 1.52
13 -11 4 2.36 1.66
13 -11 4 -0.73 1.79
13 -11 4 1.8 1.2
13 -11 4 5.46 1.74
13 -11 4 -1.1 1.75
-13 11 -3 4.89 1.99
-13 11 -3 3.88 1.2
-13 11 -3 2.57 2.17
13 -11 3 3.27 1.5
13 -11 3 3.35 1.65
13 -11 3 0.57 1.65
13 -11 3 4.54 1.43
13 -11 3 4.11 1.11
13 -11 3 2.25 1.61
13 -11 3 3.05 1.57
-13 11 -2 26.8 2.08
-13 11 -2 29.65 3.23
-13 11 -2 31.24 3.25
13 -11 2 26.88 2.82
13 -11 2 29.1 1.74
13 -11 2 27.37 2.69
13 -11 2 29.83 2.85
13 -11 2 31.37 2.6
13 -11 2 29.39 2.57
-13 11 -1 99.24 4.53
-13 11 -1 103.96 3.6
13 -11 1 102.16 4.21
13 -11 1 84.91 3.66
13 -11 1 97.31 2.75
13 -11 1 99.1 3.82
-13 11 0 20.07 1.82
-13 11 0 21.93 2.75
13 -11 0 19.36 2.14
13 -11 0 21.65 2.32
13 -11 0 23.38 1.98
13 -11 0 19.71 1.11
13 -11 0 17.84 2.25
-13 11 1 5.46 1.88
-13 11 1 5.45 1.71
-13 11 1 2.36 1
13 -11 -1 2.52 0.98
13 -11 -1 3.11 1.25
13 -11 -1 2.74 1.33
13 -11 -1 3.31 1.15
13 -11 -1 3.17 1.29
-13 11 2 2.91 1.63
-13 11 2 5.23 1.76
-13 11 2 7.31 1.23
13 -11 -2 6.57 1.14
13 -11 -2 6.17 1.23
13 -11 -2 4.25 1.34
13 -11 -2 4.23 1.33
13 -11 -2 5.94 1.38
-13 11 3 86.37 3.08
-13 11 3 83.16 3.84
-13 11 3 86.98 4.07
13 -11 -3 82.6 3.41
13 -11 -3 82.98 2.65
13 -11 -3 87.44 2.6
13 -11 -3 84.17 3.34
-13 11 4 43.58 3.2
-13 11 4 39.09 2.14
-13 11 4 36.83 3.01
13 -11 -4 38.17 2.43
13 -11 -4 35.13 2.37
-13 11 5 2.94 1.96
-13 11 5 4.02 1.1
-13 11 5 4.57 1.76
13 -11 -5 4.17 1.36
13 -11 -5 2.62 1.21
-13 11 6 11.09 1.81
-13 11 6 10.55 2.36
-13 11 6 9.4 1.35
-13 11 6 8.84 1.94
13 -11 -6 8.84 1.48
13 -11 -6 8.87 1.65
-13 11 7 5.42 2.1
-13 11 7 7.28 1.97
13 -11 -7 3.3 1.31
13 -11 -7 2.16 1.5
-13 11 8 10.61 1.3
-13 11 8 11.54 2.41
-13 11 8 11.9 2.44
-13 11 8 14.52 1.66
-13 11 9 8.04 2.4
12 -10 8 3.63 2.43
12 -10 8 3.62 2.91
12 -10 8 6.61 3.03
12 -10 8 -0.85 2.59
12 -10 8 2.11 3
-12 10 -7 0.81 2
-12 10 -7 -0.35 1.85
12 -10 7 -0.79 1.87
12 -10 7 4.07 1.8
12 -10 7 6.47 2.24
12 -10 7 -3.01 2.41
12 -10 7 3.68 2.4
-12 10 -6 0.69 1.72
-12 10 -6 -3.36 2.25
-12 10 -6 1.79 1.44
12 -10 6 -1.06 1.89
12 -10 6 2.43 1.54
12 -10 6 2.51 2.26
12 -10 6 0.97 1.75
12 -10 6 0.29 1.82
-12 10 -5 10.91 2.23
-12 10 -5 6.95 2.49
-12 10 -5 7.29 2.13
-12 10 -5 11.89 1.89
-12 10 -5 13.76 1.75
12 -10 5 10.67 2.09
12 -10 5 11.57 2.03
12 -10 5 8.08 1.98
12 -10 5 12.36 2.11
12 -10 5 13.85 1.67
12 -10 5 11.21 1.93
-12 10 -4 36.36 3.42
-12 10 -4 40.04 2.69
-12 10 -4 27.51 3.08
-12 10 -4 36.91 2.26
-12 10 -4 43.83 3.38
12 -10 4 40.72 3.18
12 -10 4 40.06 2.22
12 -10 4 34.58 3.04
12 -10 4 40.77 2.99
12 -10 4 36.85 2.78
12 -10 4 35.4 2.76
-12 10 -3 12.31 2.11
-12 10 -3 18.75 1.75
12 -10 3 14.25 1.87
12 -10 3 13.48 1.74
12 -10 3 14.07 1.87
12 -10 3 13.73 1.54
12 -10 3 13.4 1.82
-12 10 -2 27.39 2.78
-12 10 -2 30.08 1.92
12 -10 2 29.48 2.43
12 -10 2 30.16 1.63
12 -10 2 31.19 2.41
12 -10 2 26.29 2.29
12 -10 2 29.05 2.25
-12 10 -1 11.88 1.81
-12 10 -1 9.88 1.22
12 -10 1 11.74 1.69
12 -10 1 10.68 1.47
12 -10 1 12.06 1.59
12 -10 1 11.57 1.58
12 -10 1 12.43 1.11
12 -10 1 12.44 1.82
-12 10 0 48.25 2.99
-12 10 0 43.47 2.84
-12 10 0 48.97 2.21
12 -10 0 49.69 2.41
12 -10 0 46.98 2.62
12 -10 0 45.01 2.61
12 -10 0 44.6 2.45
12 -10 0 47.65 2.34
12 -10 0 44.87 1.52
-12 10 1 88.54 3.76
-12 10 1 89.51 3.01
-12 10 1 85.28 3.64
12 -10 -1 93.91 3.65
12 -10 -1 89.62 3.11
12 -10 -1 88.36 3.23
12 -10 -1 92.8 3.38
12 -10 -1 90.52 3.13
-12 10 2 43.88 2.86
-12 10 2 42.74 2.04
-12 10 2 42.12 2.95
-12 10 2 43.98 2.72
12 -10 -2 42.54 2
12 -10 -2 45.58 2.48
12 -10 -2 44.89 2.33
12 -10 -2 42.11 2.37
12 -10 -2 42.76 1.93
-12 10 3 57.13 3.1
-12 10 3 52.46 2.89
-12 10 3 52.43 3.1
-12 10 3 51.38 2.23
12 -10 -3 53.25 1.86
12 -10 -3 60.11 2.55
12 -10 -3 50.31 2.53
12 -10 -3 53.7 1.94
-12 10 4 7.04 1.6
-12 10 4 8.8 1.12
-12 10 4 8.22 1.72
12 -10 -4 11.29 1.39
12 -10 -4 6.42 1.18
-12 10 5 28.24 2.5
-12 10 5 32.32 2.87
-12 10 5 31.43 1.8
-12 10 5 29.53 1.81
12 -10 -5 30.66 2.08
12 -10 -5 26.83 1.88
-12 10 6 19.29 1.56
-12 10 6 21.22 1.64
-12 10 6 14.78 1.85
-12 10 6 20.12 2.33
12 -10 -6 15.31 1.68
-12 10 7 4.88 1.04
-12 10 7 6.16 1.75
-12 10 7 7.19 1.73
-12 10 7 5.36 1.02
-12 10 8 3.34 1.64
-12 10 8 4.61 1
-12 10 8 3 1.78
-12 10 9 2.87 1.96
-12 10 9 2.42 1.87
11 -9 9 2.82 3.1
11 -9 9 -1.89 2.27
11 -9 9 -0.96 2.48
11 -9 9 -2.46 2.48
-11 9 -8 4.35 2.09
-11 9 -8 -1.34 1.81
11 -9 8 4.18 2.05
11 -9 8 8.16 2.27
11 -9 8 1.5 2.48
11 -9 8 7.64 2.56
11 -9 8 0.74 2.08
-11 9 -7 20.23 2.13
-11 9 -7 22.49 2.51
11 -9 7 24.09 3.34
11 -9 7 26.15 3.28
11 -9 7 23.97 3.09
11 -9 7 24.28 2.79
11 -9 7 18.15 2.87
-11 9 -6 16.48 2.6
-11 9 -6 19.34 2.36
-11 9 -6 12.87 2.14
-11 9 -6 16.24 2.01
11 -9 6 16.57 2.21
11 -9 6 15.17 2.17
11 -9 6 17.36 2.53
11 -9 6 18.13 2.21
11 -9 6 15.68 2.05
11 -9 6 25.09 3.38
11 -9 6 14.31 2.05
-11 9 -5 13.94 1.62
-11 9 -5 13.24 1.66
-11 9 -5 10.66 1.95
11 -9 5 10.06 1.36
11 -9 5 9.91 1.83
11 -9 5 12.21 1.85
11 -9 5 10.31 1.75
11 -9 5 16.21 2.17
-11 9 -4 23.37 1.83
-11 9 -4 21.18 2.07
11 -9 4 19.77 2.23
11 -9 4 21.09 2.16
11 -9 4 19.57 2.4
11 -9 4 21.3 2.31
11 -9 4 22.52 1.71
-11 9 -3 22.18 2.57
-11 9 -3 21.48 1.64
-11 9 -3 21.98 2.4
11 -9 3 20.09 2.01
11 -9 3 21.43 1.99
11 -9 3 19.34 2.2
11 -9 3 22.99 1.56
11 -9 3 22.05 2.09
-11 9 -2 59.91 3.08
-11 9 -2 55.81 3.1
-11 9 -2 59.07 2.42
11 -9 2 56.01 2.74
11 -9 2 58.2 2.11
11 -9 2 55.22 2.82
11 -9 2 59.18 2.64
11 -9 2 57.92 2.79
11 -9 2 56.96 2.65
11 -9 2 59.59 2.69
-11 9 -1 5.38 1.41
-11 9 -1 3.27 0.81
11 -9 1 2.71 1.04
11 -9 1 2.77 0.97
11 -9 1 4.34 1.21
11 -9 1 3.11 1.01
11 -9 1 3.49 0.65
11 -9 1 3.25 0.95
-11 9 0 72.69 2.56
-11 9 0 75.43 3.45
-11 9 0 70.78 3.13
-11 9 0 67.51 3.13
11 -9 0 59.77 2.53
11 -9 0 72.84 1.95
11 -9 0 72.5 2.71
11 -9 0 69.48 3.01
11 -9 0 72.07 2.86
11 -9 0 67.05 2.64
-11 9 1 14.71 1.91
-11 9 1 19.1 2.07
-11 9 1 15.01 1.92
-11 9 1 18.79 1.34
11 -9 -1 19.16 1.68
11 -9 -1 19.75 1.66
11 -9 -1 19.02 1.44
11 -9 -1 19.93 1.75
11 -9 -1 17.55 1.48
-11 9 2 19.2 2.01
-11 9 2 16.41 1.26
-11 9 2 16.24 2
-11 9 2 17.91 1.86
11 -9 -2 14 1.54
11 -9 -2 15.37 1.24
11 -9 -2 15.71 1.3
11 -9 -2 15.62 1.52
11 -9 -2 14.02 1.55
-11 9 3 16.94 1.98
-11 9 3 15.27 1.85
-11 9 3 16.68 2.04
-11 9 3 16.63 1.29
11 -9 -3 16.6 1.53
11 -9 -3 16.89 1.57
11 -9 -3 18.8 1.06
11 -9 -3 17.61 1.12
-11 9 4 43.24 1.85
-11 9 4 42.49 1.89
-11 9 4 40.93 2.3
-11 9 4 42.63 2.65
-11 9 4 47.02 2.53
11 -9 -4 46.33 2.03
11 -9 -4 45.62 2.19
11 -9 -4 44.43 2.01
-11 9 5 51.21 2.62
-11 9 5 53.04 2.05
-11 9 5 46.92 2.53
-11 9 5 56.35 2.08
11 -9 -5 54.11 2.17
11 -9 -5 52.66 2.45
-11 9 6 6.55 0.9
-11 9 6 5.41 0.89
-11 9 6 7.47 1.42
-11 9 6 8.21 1.52
11 -9 -6 6.1 1.07
-11 9 7 10.88 1.73
-11 9 7 10.06 1.21
-11 9 7 9.96 1.55
-11 9 7 10.86 1.28
-11 9 8 5.14 1.65
-11 9 8 4.12 0.85
-11 9 8 5.19 1.52
-11 9 8 5.14 0.87
-11 9 9 19.53 2.06
-11 9 9 20.23 2.33
-11 9 10 7.18 2.11
-11 9 10 5.9 2.28
10 -8 9 9.59 2.54
10 -8 9 13.04 3.14
10 -8 9 10.56 2.43
10 -8 9 9.13 2.31
-10 8 -8 5.15 1.64
-10 8 -8 2.18 1.64
10 -8 8 5.94 2.2
10 -8 8 0.66 2.11
10 -8 8 2.22 2.03
10 -8 8 -0.5 1.73
10 -8 8 5.56 1.63
-10 8 -7 4 1.38
-10 8 -7 4.62 2.14
-10 8 -7 5.53 1.3
-10 8 -7 4.83 1.92
10 -8 7 -0.95 1.85
10 -8 7 5.15 2.02
10 -8 7 5.75 1.63
10 -8 7 7.87 2.05
10 -8 7 4.46 1.6
10 -8 7 3.54 1.78
10 -8 7 5.06 1.82
-10 8 -6 10.64 1.79
-10 8 -6 10.67 1.37
-10 8 -6 13.28 1.56
10 -8 6 10.39 1.98
10 -8 6 14.16 2.1
10 -8 6 12.5 1.69
10 -8 6 14.53 2.03
10 -8 6 15.48 2.3
10 -8 6 12.23 1.8
-10 8 -5 51.96 2.41
-10 8 -5 48.6 2.3
-10 8 -5 56.74 3.11
10 -8 5 52.35 2.89
10 -8 5 55.08 2.73
10 -8 5 52.38 2.82
10 -8 5 52.36 3.1
10 -8 5 49.17 2.98
10 -8 5 55.18 2.5
-10 8 -4 60.31 2.45
-10 8 -4 58.16 2.52
-10 8 -4 57.87 2.96
10 -8 4 57.16 2.78
10 -8 4 56.5 2.91
10 -8 4 56.01 2.33
10 -8 4 56.51 2.62
10 -8 4 54.15 2.91
-10 8 -3 8.94 1.55
-10 8 -3 9.79 1.22
-10 8 -3 11.56 1.69
10 -8 3 9.74 1.36
10 -8 3 9.08 1.27
10 -8 3 9.25 1.35
10 -8 3 8.8 1.12
10 -8 3 10.2 1.5
10 -8 3 8.06 1.36
10 -8 3 9.05 1.39
-10 8 -2 17.18 1.86
-10 8 -2 16.29 1.92
-10 8 -2 20.06 1.38
10 -8 2 13.75 1.44
10 -8 2 13.07 1.48
10 -8 2 16.36 1.69
10 -8 2 14.97 1.54
10 -8 2 12.91 1.48
10 -8 2 13.67 1.1
-10 8 -1 36.23 2.28
-10 8 -1 48.39 2.43
-10 8 -1 47.07 1.94
10 -8 1 52 2.18
10 -8 1 49.07 2.44
10 -8 1 42.5 2.2
10 -8 1 49.57 1.69
10 -8 1 51.7 2.25
10 -8 1 50.88 2.19
10 -8 1 52.68 2.39
-10 8 0 24.63 2.03
-10 8 0 25.05 1.88
-10 8 0 22.76 1.35
-10 8 0 22.51 1.83
10 -8 0 23.63 1.04
10 -8 0 24.7 1.54
10 -8 0 26.3 1.56
10 -8 0 24.17 1.69
10 -8 0 24.21 1.61
10 -8 0 23.23 1.68
-10 8 1 2.4 1
-10 8 1 3.89 1.05
-10 8 1 1.91 0.92
-10 8 1 1.34 0.58
10 -8 -1 2.51 0.79
10 -8 -1 1.76 0.63
10 -8 -1 1.82 0.84
10 -8 -1 2.14 0.75
10 -8 -1 3.2 0.74
-10 8 2 79.94 3.09
-10 8 2 78.26 2.94
-10 8 2 82.79 3.21
-10 8 2 84.69 2.54
10 -8 -2 85.26 2.75
10 -8 -2 83.8 2.64
10 -8 -2 83.23 2.5
10 -8 -2 81.78 2.98
10 -8 -2 84.51 2.53
-10 8 3 21.29 1.8
-10 8 3 22.23 1.29
-10 8 3 21.69 1.32
-10 8 3 19.26 1.62
-10 8 3 22.57 1.89
10 -8 -3 19.66 1.37
10 -8 -3 19.36 1.35
10 -8 -3 17.86 0.99
10 -8 -3 17.48 0.93
10 -8 -3 19.24 1.48
-10 8 4 35.73 1.98
-10 8 4 36.45 1.57
-10 8 4 33.51 2.04
-10 8 4 36.01 1.58
10 -8 -4 34.15 1.83
10 -8 -4 36.91 1.69
10 -8 -4 36.36 1.63
-10 8 5 19.82 1.73
-10 8 5 20.79 1.7
-10 8 5 21.25 1.29
-10 8 5 21.09 1.25
10 -8 -5 21.98 1.49
10 -8 -5 23.4 1.33
10 -8 -5 23.85 1.38
-10 8 6 33.04 2.13
-10 8 6 33.26 1.51
-10 8 6 31.4 1.97
-10 8 6 33.01 1.47
-10 8 6 33.8 1.93
10 -8 -6 33.14 1.58
-10 8 7 55 1.91
-10 8 7 54.53 1.93
-10 8 7 58.22 2.48
-10 8 7 63.14 2.95
-10 8 8 2.77 0.77
-10 8 8 2.06 1.17
-10 8 8 3.06 1.44
-10 8 8 2.21 0.7
-10 8 9 5.75 1.63
-10 8 9 8.07 1.08
-10 8 9 6.24 1.43
-10 8 9 6.44 1.1
-10 8 10 2.98 1.98
-10 8 10 1.12 1.68
-10 8 11 15.83 2.45
-10 8 11 13.03 2.8
9 -7 10 4.15 2.74
9 -7 10 3.45 2.43
9 -7 10 3.66 2.26
9 -7 10 4.78 2.38
-9 7 -9 5.85 1.56
9 -7 9 3.87 1.98
9 -7 9 4.69 1.93
9 -7 9 3.76 2.21
9 -7 9 4.21 2.37
9 -7 9 6.98 2.16
-9 7 -8 17.03 2.06
-9 7 -8 17.5 1.95
9 -7 8 18.13 2.59
9 -7 8 18.72 2.33
9 -7 8 18.16 2.4
9 -7 8 20.96 3.06
9 -7 8 15.89 2.41
9 -7 8 16.18 2.13
9 -7 8 17.68 2.22
-9 7 -7 22.75 2.64
-9 7 -7 21.06 1.87
-9 7 -7 19.96 1.84
-9 7 -7 23.87 3.1
9 -7 7 22.24 2.32
9 -7 7 21.98 2.65
9 -7 7 21.58 2.47
9 -7 7 16.9 2.31
9 -7 7 19.4 2.52
9 -7 7 22.02 2.77
9 -7 7 21.21 2.4
-9 7 -6 18.79 2.31
-9 7 -6 23.28 1.75
-9 7 -6 23.7 1.69
9 -7 6 24.89 2.07
9 -7 6 25.32 2.19
9 -7 6 26.68 2.49
9 -7 6 21.86 2.28
9 -7 6 22.45 2.07
9 -7 6 25.19 2.61
-9 7 -5 65.37 2.47
-9 7 -5 73.05 3.18
-9 7 -5 67.33 2.55
9 -7 5 67.06 2.73
9 -7 5 70.45 2.9
9 -7 5 68.91 2.8
9 -7 5 69.23 3.2
9 -7 5 69.14 3.02
9 -7 5 69.79 3.22
-9 7 -4 17.08 1.53
-9 7 -4 19.24 1.41
-9 7 -4 23.93 2.19
-9 7 -4 21.83 1.96
9 -7 4 19.97 1.69
9 -7 4 24.16 1.82
9 -7 4 23.33 1.61
9 -7 4 25.18 1.79
9 -7 4 21.17 1.86
9 -7 4 24.78 1.88
9 -7 4 21.89 1.96
-9 7 -3 75.76 2.97
-9 7 -3 70.03 3.05
-9 7 -3 68.91 2.43
9 -7 3 69.93 2.62
9 -7 3 75.68 2.72
9 -7 3 73.68 3.07
9 -7 3 72.72 2.86
9 -7 3 74.04 2.94
9 -7 3 74.55 2.47
9 -7 3 72.85 2.82
-9 7 -2 26.01 1.94
-9 7 -2 27.03 1.86
-9 7 -2 25.66 1.38
9 -7 2 21.95 1.17
9 -7 2 22.93 1.57
9 -7 2 23.41 1.57
9 -7 2 21.01 1.65
9 -7 2 20.96 1.66
9 -7 2 24.12 1.54
9 -7 2 22.71 1.54
-9 7 -1 206.63 5.48
-9 7 -1 207.29 5.62
-9 7 -1 201.46 5.83
-9 7 -1 204.22 4.92
9 -7 1 202.29 5.08
9 -7 1 201.81 5.43
9 -7 1 201.75 4.9
9 -7 1 199.26 5.63
9 -7 1 196.79 4.51
9 -7 1 200.97 5.18
9 -7 1 205.29 5.27
-9 7 0 38.4 2.13
-9 7 0 36.85 1.57
-9 7 0 36.95 1.98
-9 7 0 36.25 1.94
9 -7 0 35.82 1.65
9 -7 0 39.13 1.81
9 -7 0 37.67 1.22
9 -7 0 37.09 1.71
9 -7 0 37.78 1.89
9 -7 0 36.56 1.67
-9 7 1 61.83 2.42
-9 7 1 64.1 2.62
-9 7 1 61.67 2.48
-9 7 1 58.7 2
9 -7 -1 64.43 2.17
9 -7 -1 64.21 2.24
9 -7 -1 64.87 2.11
9 -7 -1 60.9 2.41
9 -7 -1 60.55 2.12
-9 7 2 50.62 2.22
-9 7 2 51.54 1.85
-9 7 2 49.26 2.26
-9 7 2 49.57 1.75
-9 7 2 45.59 2.04
9 -7 -2 47.66 1.66
9 -7 -2 47.65 1.67
9 -7 -2 46.57 2.03
9 -7 -2 50.54 1.86
9 -7 -2 48.44 1.79
-9 7 3 12.19 0.94
-9 7 3 13.4 1.3
-9 7 3 13.79 1.36
-9 7 3 13.31 1
9 -7 -3 12.15 0.74
9 -7 -3 10.88 1.01
9 -7 -3 12.57 0.73
9 -7 -3 12.4 1.18
9 -7 -3 10.9 1.04
-9 7 4 86.02 2.77
-9 7 4 82.05 2.89
-9 7 4 85.72 2.41
-9 7 4 90.55 2.51
9 -7 -4 89 2.84
9 -7 -4 88.41 2.39
9 -7 -4 79.37 2.46
-9 7 5 11.85 0.98
-9 7 5 11.92 0.97
-9 7 5 13.84 1.36
-9 7 5 13.76 1.33
-9 7 5 13.61 1.35
9 -7 -5 15.23 1
9 -7 -5 13.6 1.09
-9 7 6 27.43 1.29
-9 7 6 27.75 1.81
-9 7 6 28.19 1.62
-9 7 6 26.35 1.58
-9 7 6 26.76 1.23
9 -7 -6 26.85 1.31
-9 7 7 14.98 1.43
-9 7 7 13.87 1.15
-9 7 7 11.45 1.04
-9 7 7 16.88 1.76
-9 7 7 12.5 0.98
-9 7 8 8.3 1.05
-9 7 8 10.77 1.1
-9 7 8 10.78 1.59
-9 7 8 10.19 1.23
-9 7 9 9.47 1.33
-9 7 9 8.58 1.27
-9 7 9 10.88 1.94
-9 7 9 9.98 1.76
-9 7 9 9.78 0.94
-9 7 10 2.72 1.29
-9 7 10 2.43 1.72
-9 7 10 0.91 1.52
-9 7 11 6.38 1.75
-9 7 11 9.26 2.45
-9 7 11 7.88 2.08
8 -6 10 -0.47 1.9
8 -6 10 10.04 2.21
8 -6 10 4.5 2.24
8 -6 10 5.87 2.54
-8 6 -9 15.59 1.95
-8 6 -9 10.61 1.62
8 -6 9 16.65 2.23
8 -6 9 8.16 2.29
8 -6 9 7.15 1.87
8 -6 9 10.99 2.07
8 -6 9 16.07 2.22
8 -6 9 10.51 2.12
8 -6 9 9.12 2.15
-8 6 -8 24.12 2.62
-8 6 -8 27.65 2.14
-8 6 -8 25.63 3.16
-8 6 -8 28.48 1.9
8 -6 8 30.25 3.01
8 -6 8 27.84 2.74
8 -6 8 28.98 2.55
8 -6 8 29 2.6
8 -6 8 28.67 2.8
8 -6 8 27.74 3
8 -6 8 27.17 2.56
-8 6 -7 12.86 1.54
-8 6 -7 11.42 2.06
-8 6 -7 12.79 1.5
8 -6 7 11.72 1.7
8 -6 7 14.57 1.93
8 -6 7 14.16 1.96
8 -6 7 11.24 1.67
8 -6 7 13.81 1.69
8 -6 7 9.05 1.5
8 -6 7 12.96 1.94
-8 6 -6 7.48 1.06
-8 6 -6 8.35 1.5
-8 6 -6 9.41 1.14
8 -6 6 11.48 1.65
8 -6 6 8.89 1.36
8 -6 6 9.44 1.3
8 -6 6 10.13 1.64
8 -6 6 6.64 1.1
8 -6 6 10.76 1.45
8 -6 6 8.23 1.34
-8 6 -5 20.72 1.45
-8 6 -5 22.82 2.12
-8 6 -5 20.94 1.91
-8 6 -5 19.81 1.45
8 -6 5 18.7 1.53
8 -6 5 17.9 1.87
8 -6 5 19.4 1.67
8 -6 5 20.94 1.91
8 -6 5 18.78 1.58
8 -6 5 15.94 1.73
8 -6 5 19.31 1.64
-8 6 -4 216.27 5.65
-8 6 -4 213.8 5.08
-8 6 -4 213.62 5.19
-8 6 -4 213.22 6.04
8 -6 4 212.37 6.11
8 -6 4 207.73 5.26
8 -6 4 220.79 5.4
8 -6 4 220.38 6.05
8 -6 4 217.51 5.78
8 -6 4 213.26 5.74
8 -6 4 225.87 5.57
-8 6 -3 210.08 5.52
-8 6 -3 206.73 5.76
-8 6 -3 214.78 5.05
8 -6 3 213.82 5.09
8 -6 3 213.06 5.53
8 -6 3 210.69 5.33
8 -6 3 220.22 5.97
8 -6 3 208.31 5.54
8 -6 3 211.42 5.12
8 -6 3 207.99 5.73
-8 6 -2 37.82 1.94
-8 6 -2 40.8 2.14
-8 6 -2 37.35 1.58
-8 6 -2 39.58 2.02
8 -6 2 36.32 1.81
8 -6 2 36.27 1.75
8 -6 2 38.94 1.83
8 -6 2 40.54 1.7
8 -6 2 36.3 1.65
8 -6 2 35.81 1.93
8 -6 2 39.36 1.51
-8 6 -1 20.51 1.58
-8 6 -1 21.68 1.17
-8 6 -1 23.19 1.54
-8 6 -1 23.39 1.51
8 -6 1 22.3 1.38
8 -6 1 19.64 1.31
8 -6 1 23.01 1.35
8 -6 1 20.95 1.24
8 -6 1 21.99 1
-8 6 0 94.29 2.94
-8 6 0 94.45 3.18
-8 6 0 89.16 2.56
-8 6 0 94.89 3.04
8 -6 0 88.79 2.53
8 -6 0 87.81 2.65
8 -6 0 71.14 2.47
8 -6 0 84.16 2.84
8 -6 0 88.26 2.09
8 -6 0 85.18 2.47
-8 6 1 362.58 8.8
-8 6 1 365.17 8.29
-8 6 1 365.01 8.56
-8 6 1 371.11 7.67
8 -6 -1 369.5 7.96
8 -6 -1 363.45 7.09
8 -6 -1 365.28 8.71
8 -6 -1 358.87 8.05
8 -6 -1 368.27 8.11
8 -6 -1 365.35 7.66
-8 6 2 97.1 3.11
-8 6 2 96.97 2.69
-8 6 2 101.08 2.62
-8 6 2 100.25 2.92
8 -6 -2 100.38 2.55
8 -6 -2 98.74 2.61
8 -6 -2 100.02 2.61
8 -6 -2 93.97 2.67
8 -6 -2 97.91 3.02
-8 6 3 6.29 0.7
-8 6 3 7.97 0.96
-8 6 3 5.69 0.74
-8 6 3 6.17 0.88
8 -6 -3 6.61 0.86
8 -6 -3 5.05 0.64
8 -6 -3 5.2 0.65
-8 6 4 7.37 0.74
-8 6 4 11.07 0.8
-8 6 4 9.41 1.06
-8 6 4 9.62 1.02
8 -6 -4 9.08 0.82
8 -6 -4 7.99 0.8
8 -6 -4 8.36 0.94
-8 6 5 40.57 1.45
-8 6 5 42.01 1.41
-8 6 5 41 1.64
-8 6 5 40.05 1.7
-8 6 5 39.49 1.23
-8 6 5 45.18 1.94
8 -6 -5 39.48 1.28
8 -6 -5 36.89 1.48
-8 6 6 36.52 1.41
-8 6 6 37.94 1.31
-8 6 6 38.56 1.56
-8 6 6 39.59 1.96
-8 6 6 35.05 1.66
-8 6 7 9.85 1.31
-8 6 7 8.09 1.07
-8 6 7 9.24 0.92
-8 6 7 8.7 1
-8 6 8 20.6 1.21
-8 6 8 19.03 1.83
-8 6 8 23.81 1.58
-8 6 8 19.54 1.33
-8 6 9 13.93 1.83
-8 6 9 12.17 1.36
-8 6 9 13.64 1.17
-8 6 9 8.44 1.66
-8 6 10 2.79 0.81
-8 6 10 1.91 1.51
-8 6 10 5.22 1.81
-8 6 10 1.24 1.36
-8 6 11 -0.06 1.72
-8 6 11 0.25 2.1
-8 6 11 -0.37 1.67
7 -5 11 2.94 2.41
7 -5 11 8.28 2.44
7 -5 11 7.12 2.35
7 -5 11 6.82 3.12
7 -5 10 4.98 1.9
7 -5 10 -1.08 2.24
7 -5 10 3.59 1.82
7 -5 10 5.05 2.16
7 -5 10 2.21 1.76
7 -5 10 0.73 1.85
-7 5 -9 0.45 1.17
-7 5 -9 1.19 1.06
-7 5 -9 1.9 2.13
7 -5 9 3.06 1.49
7 -5 9 2.17 1.6
7 -5 9 2.07 1.45
7 -5 9 3.27 1.58
7 -5 9 2.42 1.74
7 -5 9 2.02 1.81
7 -5 9 1 1.48
-7 5 -8 4.33 1.88
-7 5 -8 3.98 0.97
-7 5 -8 4.38 1.09
-7 5 -8 1.26 1.2
7 -5 8 1.31 1.32
7 -5 8 3.29 1.26
7 -5 8 3.7 1.42
7 -5 8 2.77 1.42
7 -5 8 3.51 1.26
7 -5 8 1.02 1.56
7 -5 8 0.95 1.2
-7 5 -7 34.89 1.89
-7 5 -7 36.3 1.74
7 -5 7 37.69 2.45
7 -5 7 36.3 2.24
7 -5 7 37.46 2.64
7 -5 7 35.48 2.16
7 -5 7 34.08 2.39
7 -5 7 37 2.32
-7 5 -6 67.56 2.25
-7 5 -6 66.4 2.75
-7 5 -6 70.6 3.26
-7 5 -6 73.99 2.53
7 -5 6 64.15 2.75
7 -5 6 65.28 2.91
7 -5 6 62.66 3.01
7 -5 6 66.53 2.59
7 -5 6 67.12 2.73
7 -5 6 62.17 2.43
-7 5 -5 56.36 2.78
-7 5 -5 65.03 2.22
-7 5 -5 59.24 2.02
-7 5 -5 61.66 2.53
7 -5 5 67.32 2.55
7 -5 5 67.79 2.8
7 -5 5 64.89 2.36
7 -5 5 62.89 2.54
7 -5 5 61.86 2.77
-7 5 -4 45.45 1.7
-7 5 -4 47.14 2.07
-7 5 -4 46.16 2.34
-7 5 -4 48.33 1.82
7 -5 4 48.34 2.09
7 -5 4 40.74 2.09
7 -5 4 45.94 2.19
7 -5 4 46.45 1.91
7 -5 4 44.74 1.86
-7 5 -3 37.46 1.9
-7 5 -3 36.15 1.78
-7 5 -3 36.73 1.52
-7 5 -3 35.35 1.47
7 -5 3 35.34 1.81
7 -5 3 36.18 1.57
7 -5 3 35.82 1.58
7 -5 3 36.21 1.86
7 -5 3 38.37 1.78
7 -5 3 38.29 1.78
-7 5 -2 318.41 6.81
-7 5 -2 314.5 7.87
-7 5 -2 323.87 7.41
-7 5 -2 311.25 7.63
7 -5 2 305.09 6.6
7 -5 2 305.37 6.55
7 -5 2 308.08 7.58
7 -5 2 299.09 7.34
7 -5 2 305.38 7.06
7 -5 2 306.02 7.13
-7 5 -1 447.87 9.1
-7 5 -1 436.37 10.08
-7 5 -1 447.8 9.83
7 -5 1 473.69 10.91
7 -5 1 457.8 10.55
7 -5 1 476.95 10.2
7 -5 1 468.03 9.59
7 -5 1 472.61 10.28
7 -5 1 468.97 9.4
-7 5 0 86.13 2.65
-7 5 0 90.79 2.89
-7 5 0 86.34 2.73
-7 5 0 88.89 2.37
7 -5 0 82.71 2.33
7 -5 0 95.31 2.83
7 -5 0 82.79 2.48
7 -5 0 82.99 2.44
7 -5 0 81.7 2.37
7 -5 0 83.77 2.02
-7 5 1 23.53 1.32
-7 5 1 23.05 1.35
-7 5 1 23.36 1.09
-7 5 1 23.96 1.25
-7 5 1 23.4 1.03
7 -5 -1 27.04 1.2
7 -5 -1 28.55 1.22
7 -5 -1 28.75 1.18
7 -5 -1 29.27 1.4
7 -5 -1 27.37 1.14
7 -5 -1 28.45 0.82
-7 5 2 61.89 1.81
-7 5 2 59.74 2.12
-7 5 2 61.53 1.98
-7 5 2 60.67 1.75
7 -5 -2 61.48 1.68
7 -5 -2 58.74 2.04
7 -5 -2 61.56 1.8
7 -5 -2 59.42 1.72
7 -5 -2 59.95 1.75
-7 5 3 355.96 7.7
-7 5 3 349.97 8.17
-7 5 3 350.12 7.53
-7 5 3 356.4 7.17
7 -5 -3 350.51 7.03
7 -5 -3 341.81 7.4
7 -5 -3 349.52 7.98
-7 5 4 58.6 1.99
-7 5 4 62.81 1.86
-7 5 4 61.33 1.69
-7 5 4 59.97 1.74
7 -5 -4 61.11 1.63
7 -5 -4 58.76 1.74
-7 5 5 15.27 0.86
-7 5 5 14.78 0.89
-7 5 5 14.85 1.18
-7 5 5 15.13 0.8
-7 5 5 14.49 1.02
7 -5 -5 15.97 0.9
-7 5 6 24.17 1.08
-7 5 6 24.06 1.12
-7 5 6 22.26 1.16
-7 5 6 24.91 1.52
-7 5 6 25.15 0.97
-7 5 7 20.57 1.12
-7 5 7 23.08 1.69
-7 5 8 18.96 1.84
-7 5 8 17.07 1.15
-7 5 8 21.19 1.66
-7 5 9 0.76 1.08
-7 5 9 0.93 1.19
-7 5 9 2.19 1.02
-7 5 9 1.75 0.71
-7 5 10 10.01 1.32
-7 5 10 8.37 1.54
-7 5 10 7.79 1.91
-7 5 10 8.56 1.58
-7 5 11 2.3 1.69
-7 5 11 5.74 2.01
-7 5 11 2.25 1.72
-7 5 11 2.68 0.99
6 -4 11 1.64 2.52
6 -4 11 -0.2 2.06
6 -4 11 -0.08 1.84
6 -4 11 2.38 2.26
-6 4 -10 2.82 1.36
6 -4 10 3.54 1.71
6 -4 10 1.14 1.63
6 -4 10 5.11 1.69
6 -4 10 3.44 2.05
6 -4 10 2.58 1.65
6 -4 10 0.97 1.81
6 -4 10 4.17 2.19
-6 4 -9 13.14 2.43
-6 4 -9 12.96 1.67
-6 4 -9 16.32 1.78
-6 4 -9 13.52 1.33
6 -4 9 11.6 1.62
6 -4 9 12.22 2.23
6 -4 9 21.04 2.24
6 -4 9 13.92 1.81
6 -4 9 15.99 2.12
6 -4 9 15.35 2.22
-6 4 -8 6.84 1.32
-6 4 -8 8.14 1.15
-6 4 -8 10.01 1.1
6 -4 8 3.65 1.19
6 -4 8 6.61 1.6
6 -4 8 6.13 1.52
6 -4 8 4.72 1.21
6 -4 8 6.94 1.33
6 -4 8 6.52 1.26
-6 4 -7 7.79 1.01
-6 4 -7 8.49 0.95
-6 4 -7 9.46 1.8
6 -4 7 8.53 1.4
6 -4 7 10.86 1.28
6 -4 7 9.33 1.47
6 -4 7 7.92 1.19
6 -4 7 10.39 1.5
6 -4 7 8.66 1.32
-6 4 -6 30.24 2.24
-6 4 -6 30.06 1.51
-6 4 -6 28.7 1.76
-6 4 -6 29.67 1.39
6 -4 6 31.35 1.92
6 -4 6 27.91 1.57
6 -4 6 29.42 2
6 -4 6 30.33 1.86
6 -4 6 27.17 1.75
-6 4 -5 64.66 2
-6 4 -5 69.42 2.25
-6 4 -5 66.09 2.43
-6 4 -5 68.81 2.83
6 -4 5 65.93 2.44
6 -4 5 67.16 2.45
6 -4 5 61.77 2.16
6 -4 5 59.93 2.53
6 -4 5 64.76 2.67
-6 4 -4 49.13 2.24
-6 4 -4 51.22 1.63
-6 4 -4 51.83 1.79
6 -4 4 49.61 1.98
6 -4 4 51.17 2.14
6 -4 4 48.37 1.93
6 -4 4 48.13 2.14
6 -4 4 49.88 1.81
-6 4 -3 54.41 2.15
-6 4 -3 53.6 1.75
-6 4 -3 51.35 1.94
-6 4 -3 51.57 1.65
6 -4 3 53.89 1.81
6 -4 3 55.77 2.18
6 -4 3 55.44 2.02
6 -4 3 56.14 1.9
6 -4 3 54.53 2.16
-6 4 -2 354.32 7.34
-6 4 -2 350.26 8.2
-6 4 -2 355.98 8.43
-6 4 -2 352.84 7.91
6 -4 2 358.71 7.39
6 -4 2 354.94 7.95
6 -4 2 351.44 7.39
6 -4 2 344.71 8.19
6 -4 2 364.82 8.45
-6 4 -1 13.36 0.83
-6 4 -1 12.92 1.02
-6 4 -1 13.23 1.11
-6 4 -1 12.56 0.97
6 -4 1 13.49 0.92
6 -4 1 12.46 0.9
6 -4 1 13.48 0.85
6 -4 1 12.84 0.76
6 -4 1 11.97 1
6 -4 1 11.2 0.91
-6 4 0 211.67 4.6
-6 4 0 207.44 5.13
-6 4 0 223.72 5.36
-6 4 0 212.91 5
6 -4 0 211.98 4.83
6 -4 0 208.73 4.57
6 -4 0 211.76 5.24
6 -4 0 211.16 4.91
6 -4 0 215.11 4.34
-6 4 1 169.78 3.88
-6 4 1 174.17 4.31
-6 4 1 165.93 3.7
-6 4 1 166.33 4.19
-6 4 1 169 4.02
-6 4 1 166.55 3.37
6 -4 -1 170.32 3.86
6 -4 -1 169.62 3.73
6 -4 -1 176.18 4.3
6 -4 -1 175.72 3.92
6 -4 -1 171.2 3.96
6 -4 -1 158.13 3.37
-6 4 2 262.62 6.14
-6 4 2 269.38 5.64
-6 4 2 255.78 5.76
-6 4 2 257.23 5.36
6 -4 -2 253.88 5.49
6 -4 -2 264.44 5.58
6 -4 -2 255.4 5.45
6 -4 -2 259.02 6.05
6 -4 -2 261.59 5.32
-6 4 3 209.19 4.97
-6 4 3 202.72 4.62
-6 4 3 211.21 4.35
-6 4 3 208.94 4.54
6 -4 -3 221.28 5.24
6 -4 -3 223.26 4.59
6 -4 -3 226.72 4.86
-6 4 4 30.63 1.07
-6 4 4 31.23 1.39
-6 4 4 30.84 1.06
-6 4 4 31.96 1.02
-6 4 4 30.17 1.22
6 -4 -4 34.51 1.01
6 -4 -4 32.38 1.17
-6 4 5 107.74 2.55
-6 4 5 109.81 3.1
-6 4 5 113.54 2.49
-6 4 5 110.94 2.83
-6 4 5 109.27 2.68
-6 4 6 23.49 1.39
-6 4 6 24.09 1.06
-6 4 7 31.59 1.33
-6 4 7 34.87 1.78
-6 4 8 46.14 1.77
-6 4 8 55.87 2.69
-6 4 8 51.44 2.32
-6 4 9 8.53 1.42
-6 4 9 10.91 1.71
-6 4 9 8.91 1.17
-6 4 10 11.45 1.74
-6 4 10 10.31 1.38
-6 4 10 11.53 1.62
-6 4 10 13.1 2.1
-6 4 11 2.92 1.07
-6 4 11 3.21 1.89
-6 4 11 3.63 1.57
-6 4 11 2.01 1.66
-6 4 12 9.3 2.61
-6 4 12 2.76 2.1
-6 4 12 4.16 2.03
5 -3 11 4.72 1.68
5 -3 11 3.27 2.27
5 -3 11 5.9 2
5 -3 11 4.06 2.43
5 -3 11 3.41 1.97
-5 3 -10 3.93 1.17
-5 3 -10 2.24 1.34
5 -3 10 4.61 1.44
5 -3 10 2.17 1.67
5 -3 10 2.6 1.38
5 -3 10 5.46 1.98
5 -3 10 5.78 1.58
5 -3 10 4.94 1.54
-5 3 -9 0.33 0.89
-5 3 -9 0.99 0.9
-5 3 -9 0.26 1.7
-5 3 -9 1.74 1.11
5 -3 9 0.7 1.14
5 -3 9 1.31 1.07
5 -3 9 1.2 1.14
5 -3 9 1.68 1.23
5 -3 9 0.93 1.56
5 -3 9 1.11 1.21
-5 3 -8 15.84 1.28
-5 3 -8 16.49 1.35
5 -3 8 16.29 2.08
5 -3 8 16.22 1.73
5 -3 8 15.67 1.77
5 -3 8 15.94 1.62
5 -3 8 17.14 1.99
5 -3 8 16.51 1.77
-5 3 -7 57.75 2.27
-5 3 -7 56.12 2.91
-5 3 -7 56.64 1.88
-5 3 -7 56.22 2
5 -3 7 55.22 2.56
5 -3 7 54.45 2.39
5 -3 7 56.22 2.48
5 -3 7 55.21 2.72
5 -3 7 55.06 2.34
-5 3 -6 1.98 0.61
-5 3 -6 2.38 0.61
-5 3 -6 1.77 0.74
-5 3 -6 2.87 0.97
5 -3 6 2 0.72
5 -3 6 2.25 0.79
5 -3 6 2.86 0.9
5 -3 6 1.67 0.78
-5 3 -5 21.04 1.62
-5 3 -5 18.16 0.97
-5 3 -5 17.61 1.26
5 -3 5 16.97 1.25
5 -3 5 19.78 1.13
5 -3 5 16.39 1.29
5 -3 5 20.78 1.48
-5 3 -4 57.04 2.3
-5 3 -4 60.16 1.7
-5 3 -4 60.73 1.85
5 -3 4 61.67 1.9
5 -3 4 60.02 2.08
5 -3 4 61.74 2.25
5 -3 4 59.26 2.29
-5 3 -3 13.04 0.85
-5 3 -3 13.57 1.13
-5 3 -3 12.65 0.76
-5 3 -3 12.11 0.94
5 -3 3 13.13 1.04
5 -3 3 10 0.95
5 -3 3 11.92 0.91
5 -3 3 11.29 0.8
-5 3 -2 17.39 1.13
-5 3 -2 16.87 0.85
-5 3 -2 17.14 1.01
5 -3 2 14.23 1
5 -3 2 15.9 0.85
5 -3 2 15.24 0.87
5 -3 2 17.2 1.05
5 -3 2 15.79 0.95
-5 3 -1 168.16 3.95
-5 3 -1 167.39 3.63
-5 3 -1 159.46 4.05
-5 3 -1 163.51 4.19
5 -3 1 154.26 3.39
5 -3 1 156.3 3.44
5 -3 1 151.68 3.71
5 -3 1 154.8 3.84
-5 3 0 635.76 13.87
-5 3 0 683.86 14.29
-5 3 0 643.08 13.49
-5 3 0 655.66 12.62
5 -3 0 714.64 14.78
5 -3 0 675.26 12.94
5 -3 0 686.72 13.89
5 -3 0 676.32 13.96
5 -3 0 664.34 13.06
5 -3 0 657.33 14.35
-5 3 1 105.28 2.67
-5 3 1 108.74 2.48
-5 3 1 108.16 2.23
-5 3 1 113.51 2.89
-5 3 1 113.26 2.58
5 -3 -1 100.88 2.42
5 -3 -1 106.67 2.74
5 -3 -1 106.51 2.45
5 -3 -1 99.4 2.49
5 -3 -1 103.59 2.11
5 -3 -1 104.56 2.36
-5 3 2 84.42 2.11
-5 3 2 83.01 1.79
-5 3 2 86.18 2.01
-5 3 2 85.14 1.97
-5 3 2 85.52 2.3
5 -3 -2 91.05 2.06
5 -3 -2 88.94 2.01
5 -3 -2 92.14 2.11
5 -3 -2 89.32 2
5 -3 -2 88.93 2.38
-5 3 3 45.9 1.26
-5 3 3 42.88 1.49
-5 3 3 51.57 1.48
-5 3 3 43.28 1.24
-5 3 3 49.18 1.24
5 -3 -3 50.78 1.27
5 -3 -3 50.9 1.36
-5 3 4 276.25 6.03
-5 3 4 266.67 5.69
-5 3 4 271.08 5.34
-5 3 4 261.86 5.93
5 -3 -4 263.93 5.81
-5 3 5 108.47 2.68
-5 3 5 110.01 3.02
-5 3 5 114.66 2.44
-5 3 6 31.08 1.5
-5 3 6 27.8 1.16
-5 3 7 24.87 1.51
-5 3 7 26.67 1.25
-5 3 7 26.55 1.78
-5 3 8 14.48 1.41
-5 3 8 15.43 1.15
-5 3 8 16.11 1.74
-5 3 9 42.71 1.82
-5 3 9 44.02 2.25
-5 3 9 47.05 2.73
-5 3 10 7.27 1.69
-5 3 10 6.38 1.46
-5 3 10 6.86 1.05
-5 3 10 10.67 1.51
-5 3 11 2.33 1.49
-5 3 11 3.99 1.65
-5 3 11 4.66 1.95
-5 3 11 4.29 1.2
-5 3 12 -1.66 2.31
-5 3 12 -1.04 2.06
-5 3 12 2.7 1.94
4 -2 11 -0.03 1.71
4 -2 11 2.04 1.98
4 -2 11 -1.33 1.33
4 -2 11 2.17 1.62
4 -2 11 2.21 2.14
4 -2 10 13.73 2.21
4 -2 10 16.84 2.21
4 -2 10 15.03 1.64
4 -2 10 13.39 1.67
4 -2 10 14.28 1.69
4 -2 10 15.22 2.03
-4 2 -9 3.89 0.85
-4 2 -9 5.36 1.03
4 -2 9 2.96 1.03
4 -2 9 5.37 1.68
4 -2 9 3.96 1.19
4 -2 9 6.65 1.61
4 -2 9 4.68 1.08
4 -2 9 6.41 1.19
4 -2 9 4.53 0.95
-4 2 -8 9.76 1.12
-4 2 -8 10.45 1.68
-4 2 -8 8.8 1.05
4 -2 8 11.17 1.35
4 -2 8 12.43 1.77
4 -2 8 9.71 1.16
4 -2 8 9.14 1.33
4 -2 8 10.42 1.28
4 -2 8 10.59 1.03
4 -2 8 12.24 1.65
-4 2 -7 4.79 0.71
-4 2 -7 4.1 0.69
-4 2 -7 2.8 0.8
-4 2 -7 4.21 1.22
4 -2 7 4.06 0.84
4 -2 7 5.27 1.11
4 -2 7 6.74 1.07
4 -2 7 4.56 0.74
4 -2 7 5.33 0.97
4 -2 7 3.9 1.06
-4 2 -6 26.47 1.18
-4 2 -6 27.5 1.39
-4 2 -6 27.93 1.9
-4 2 -6 27.22 1.23
4 -2 6 26.43 1.76
4 -2 6 26.88 1.53
4 -2 6 25.46 1.19
4 -2 6 26.04 1.42
4 -2 6 23.79 1.45
-4 2 -5 72.69 2.17
-4 2 -5 71.62 1.99
-4 2 -5 70.1 2.62
-4 2 -5 70.78 1.91
4 -2 5 75.07 2.46
4 -2 5 69.57 2.26
4 -2 5 72.48 2.06
4 -2 5 71 1.96
4 -2 5 66.86 2.57
-4 2 -4 29.37 1.28
-4 2 -4 29.74 1.04
-4 2 -4 32.71 1.59
4 -2 4 28.3 1.35
4 -2 4 32.11 1.52
4 -2 4 28.22 1.04
4 -2 4 27.72 1.14
4 -2 4 29.88 1.3
-4 2 -3 135.73 3
-4 2 -3 139.43 3.12
-4 2 -3 137.46 3.67
4 -2 3 142.84 3.75
4 -2 3 144.43 3.25
4 -2 3 141.62 3.78
4 -2 3 144.55 3.53
-4 2 -2 123.84 3.34
-4 2 -2 135.07 2.95
-4 2 -2 132.36 3.16
-4 2 -2 135.96 3.43
-4 2 -2 129.92 2.84
4 -2 2 141.21 3.5
4 -2 2 129.77 3.25
4 -2 2 137.79 3.02
4 -2 2 131.78 3.43
-4 2 -1 9.66 0.76
-4 2 -1 9.68 0.59
-4 2 -1 11.69 0.76
-4 2 -1 11.11 0.71
4 -2 1 10.35 0.6
4 -2 1 11.63 0.72
4 -2 1 12.47 0.76
4 -2 1 10.29 0.78
4 -2 1 10.25 0.63
-4 2 0 369.33 8.09
-4 2 0 370.31 7.86
-4 2 0 390.95 7.36
-4 2 0 383.01 8.32
-4 2 0 371.21 7.27
4 -2 0 402.39 7.59
4 -2 0 395.55 7.67
4 -2 0 401.64 8.67
4 -2 0 378.06 8.43
-4 2 1 180.01 3.94
-4 2 1 176.54 3.53
-4 2 1 182.8 4.19
-4 2 1 186.63 3.69
4 -2 -1 201.46 4.23
4 -2 -1 197.32 3.91
4 -2 -1 200.8 4.06
4 -2 -1 210.65 4.63
4 -2 -1 201.54 4.3
-4 2 2 692.1 14.72
-4 2 2 725.14 13.86
-4 2 2 662.46 13.88
4 -2 -2 660.56 12.47
4 -2 -2 659.76 13.2
-4 2 3 12.76 0.64
4 -2 -3 13.31 0.6
-4 2 4 153.44 3.43
-4 2 4 155.31 3.56
-4 2 4 152.25 3.65
-4 2 4 155.46 3.17
-4 2 5 13.17 0.78
-4 2 5 17.84 0.66
-4 2 5 16.16 0.99
-4 2 6 154.95 4.46
-4 2 6 164.82 3.39
-4 2 6 157.62 4
-4 2 7 43.07 2.15
-4 2 7 39.03 1.77
-4 2 8 5.97 0.97
-4 2 8 6.68 0.71
-4 2 8 7.3 1.24
-4 2 9 9.27 1.34
-4 2 9 8.89 1.08
-4 2 9 8.31 1.06
-4 2 9 10.08 1.56
-4 2 10 7.8 1.77
-4 2 10 9.91 1.5
-4 2 10 9.78 1.13
-4 2 10 11.86 1.66
-4 2 10 10.31 1.24
-4 2 11 10.41 1.95
-4 2 11 6.76 1.58
-4 2 11 11.07 2.24
-4 2 11 9.59 1.28
-4 2 11 8.04 1.4
-4 2 12 3.2 1.41
-4 2 12 2.96 1.75
-4 2 12 -1.63 2.25
-4 2 12 -1.57 1.99
3 -1 12 3.6 2.63
3 -1 12 2.75 2.03
3 -1 12 5.79 2.56
3 -1 11 12.08 1.77
3 -1 11 15.5 2.48
3 -1 11 9.79 1.44
3 -1 11 14.12 1.85
3 -1 11 12.04 1.42
3 -1 11 10.18 1.4
3 -1 11 11.23 2.34
3 -1 10 16.8 1.75
3 -1 10 19.65 1.68
3 -1 10 18.87 2.09
3 -1 10 19.98 2.39
3 -1 10 17.59 1.99
3 -1 10 20.72 2.67
3 -1 10 20.42 2.16
3 -1 9 2.92 0.79
3 -1 9 2.75 0.91
3 -1 9 3.1 1.4
3 -1 9 2.58 1.24
3 -1 9 2.67 0.89
3 -1 9 2.62 1.06
3 -1 9 2.44 0.87
-3 1 -8 29.91 1.38
-3 1 -8 30.33 1.26
3 -1 8 32.52 1.56
3 -1 8 33.29 1.76
3 -1 8 35.64 2.27
3 -1 8 31.25 1.7
3 -1 8 35.21 2.38
3 -1 8 31.73 1.75
-3 1 -7 12.09 1.7
-3 1 -7 10.98 1.03
-3 1 -7 11.05 1.01
-3 1 -7 12.55 0.85
3 -1 7 13.88 1.53
3 -1 7 13.05 1.46
3 -1 7 14.39 1.06
3 -1 7 14.77 1.23
3 -1 7 12.41 1.2
3 -1 7 14.09 1.24
-3 1 -6 131.64 3.17
-3 1 -6 134.62 4.06
-3 1 -6 133.64 3.18
-3 1 -6 132.65 3.05
3 -1 6 140.17 3.61
3 -1 6 138.83 3.35
3 -1 6 140.24 4.21
3 -1 6 139.31 3.72
3 -1 6 142.16 3.83
-3 1 -5 64.13 1.77
-3 1 -5 68.49 1.76
-3 1 -5 65.32 1.86
-3 1 -5 64.53 2.41
3 -1 5 59.88 1.73
3 -1 5 59.02 1.9
3 -1 5 65.24 1.78
3 -1 5 58.8 2.27
3 -1 5 65.39 2.06
-3 1 -4 96.52 2.24
-3 1 -4 94.75 2.85
-3 1 -4 96.03 2.25
-3 1 -4 94.71 2.36
3 -1 4 93.42 2.27
3 -1 4 92.34 2.82
3 -1 4 94.35 2.46
3 -1 4 94.55 2.24
3 -1 4 97.79 2.67
-3 1 -3 85.51 2.03
-3 1 -3 85.1 1.94
-3 1 -3 86.01 2.48
3 -1 3 90.65 2.42
3 -1 3 87.04 1.99
3 -1 3 82.82 2.49
3 -1 3 88.57 2.23
3 -1 3 87.9 2.06
-3 1 -2 56.78 1.32
-3 1 -2 59.92 1.75
-3 1 -2 54.86 1.68
-3 1 -2 59.3 1.51
3 -1 2 53.87 1.52
3 -1 2 55.14 1.39
3 -1 2 57.55 1.31
3 -1 2 58.48 1.72
3 -1 2 55.08 1.65
-3 1 -1 235.72 4.93
-3 1 -1 225.56 4.59
-3 1 -1 229.24 5.11
-3 1 -1 237.75 5.23
3 -1 1 240.78 4.79
3 -1 1 236.1 5.22
3 -1 1 234.69 5.03
3 -1 1 233.64 4.69
3 -1 1 239.51 5.32
-3 1 0 10.43 0.42
-3 1 0 10.21 0.49
-3 1 0 9.82 0.47
-3 1 0 11.22 0.51
-3 1 0 9.58 0.38
3 -1 0 12.18 0.43
3 -1 0 12.93 0.46
-3 1 1 211.06 4.41
-3 1 1 198.95 4.01
-3 1 1 199.67 3.89
-3 1 1 195.36 4.06
-3 1 1 189.61 4.11
3 -1 -1 209.85 4.46
3 -1 -1 193.18 4.14
3 -1 -1 202.86 3.94
-3 1 2 103.97 2.35
-3 1 2 96.29 2.3
-3 1 2 98.03 2.11
-3 1 2 99.79 2.07
3 -1 -2 107.08 2.46
3 -1 -2 108.9 2.2
-3 1 3 2.53 0.42
-3 1 3 2.2 0.28
-3 1 3 2.03 0.31
3 -1 -3 4.01 0.37
3 -1 -3 3.88 0.32
3 -1 -3 4.34 0.53
-3 1 4 293.45 6.2
-3 1 4 288.9 5.72
-3 1 4 287.23 6.74
-3 1 4 293.04 6.38
3 -1 -4 287.31 6.18
3 -1 -4 281.07 6.05
-3 1 5 44.41 1.89
-3 1 5 52.95 1.39
-3 1 5 56.54 1.56
-3 1 5 52.23 1.71
3 -1 -5 47.6 1.64
-3 1 6 105.34 2.46
-3 1 6 108.14 3.35
-3 1 6 99.35 2.4
-3 1 6 103.72 2.68
-3 1 6 100.81 2.85
-3 1 7 19.01 0.94
-3 1 7 21.12 1.65
-3 1 7 19.31 1.07
-3 1 7 19.27 1.28
-3 1 8 15.22 1.32
-3 1 8 14.74 1.09
-3 1 8 15.41 1.05
-3 1 8 16.19 1.71
-3 1 8 16.89 1.08
-3 1 9 8.67 1.17
-3 1 9 10.5 1.64
-3 1 9 10.18 1.28
-3 1 10 11.51 1.47
-3 1 10 9.32 1.33
-3 1 10 10.35 1.86
-3 1 11 7.76 1.37
-3 1 11 13.37 2.39
-3 1 11 10.51 1.58
-3 1 11 9.53 1.95
-3 1 12 -1.79 2.38
-3 1 12 1.77 1.73
-3 1 12 -2.12 1.51
-3 1 12 -0.96 1.56
-3 1 12 -1.48 2
2 0 12 1.16 2.7
2 0 12 -1.05 1.68
2 0 12 0.57 2.26
2 0 11 3.63 1.98
2 0 11 1.34 1.16
2 0 11 -0.64 1.34
2 0 11 -3.84 1.81
2 0 11 0.47 1.38
2 0 10 0.83 1.05
2 0 10 0.51 1.11
2 0 10 -0.68 1.49
2 0 10 3.09 1.05
2 0 10 0.31 1.5
2 0 9 25.84 1.57
2 0 9 25.96 2.28
2 0 9 24.59 1.53
2 0 9 24.49 1.46
2 0 9 26.25 1.58
2 0 9 29.78 2.44
2 0 9 27.23 1.74
2 0 8 23.19 1.36
2 0 8 24.23 1.42
2 0 8 24.26 2.1
2 0 8 29.72 2.06
2 0 8 26.27 1.54
2 0 8 22.37 1.49
2 0 7 2.73 0.84
2 0 7 2.37 0.62
2 0 7 1.6 0.59
2 0 7 1.9 0.62
2 0 7 1.96 0.58
2 0 7 1.75 0.88
-2 0 -6 22.64 0.91
-2 0 -6 21.78 0.83
2 0 6 21.88 1.12
2 0 6 21.11 1.07
2 0 6 21.77 1.1
2 0 6 22.3 1.53
-2 0 -5 19.03 0.89
-2 0 -5 17.65 0.79
-2 0 -5 19.38 1.31
-2 0 -5 18.02 0.71
2 0 5 19.29 1.23
2 0 5 17.44 0.93
2 0 5 19.44 0.92
2 0 5 18.34 0.91
-2 0 -4 598.15 11.31
-2 0 -4 594.22 12.9
-2 0 -4 593.93 11.37
-2 0 -4 591.39 11.7
2 0 4 603.99 12.82
2 0 4 587.53 11.72
2 0 4 595.01 11.37
2 0 4 590.29 12.93
-2 0 -3 143.79 2.86
-2 0 -3 144.69 2.93
-2 0 -3 133.94 3.47
-2 0 -3 137.7 2.97
2 0 3 149.01 3.36
2 0 3 144.5 2.94
2 0 3 136.21 3.53
2 0 3 139.32 3.02
-2 0 -2 495.39 9.63
-2 0 -2 502.43 10.54
-2 0 -2 498.94 10.61
-2 0 -2 497.95 9.42
2 0 2 508.55 10.54
2 0 2 497.19 10.6
2 0 2 492.54 9.62
2 0 2 493.64 9.42
-2 0 -1 41.5 0.95
-2 0 -1 40.65 1.1
-2 0 -1 42.27 1.06
-2 0 -1 43.02 1.08
2 0 1 40.97 0.99
2 0 1 42.89 1.09
2 0 1 41.46 1.07
2 0 1 44.63 1.13
2 0 1 42.15 0.94
2 0 -1 344.5 6.75
-2 0 2 68.74 1.53
-2 0 2 67.39 1.66
-2 0 2 65.08 1.68
-2 0 2 71.2 1.52
2 0 -2 69.96 1.68
2 0 -2 67.49 1.51
-2 0 3 136.7 3.54
-2 0 3 140.59 3.21
-2 0 3 138.94 3.03
-2 0 3 150.32 3.34
-2 0 3 150.62 3.02
2 0 -3 148.44 3.01
2 0 -3 143.92 3.25
-2 0 4 2.19 0.3
-2 0 4 2.63 0.58
-2 0 4 2.16 0.38
-2 0 4 2.78 0.43
-2 0 4 2.75 0.49
2 0 -4 2.4 0.36
2 0 -4 2.22 0.34
2 0 -4 1.96 0.46
-2 0 5 48.16 1.62
-2 0 5 48.42 1.33
-2 0 5 48.55 1.43
-2 0 5 46.95 1.53
-2 0 5 45.55 1.91
2 0 -5 49.14 1.29
2 0 -5 49.5 1.33
2 0 -5 47.08 1.6
-2 0 6 17.22 0.83
-2 0 6 15.29 1.31
-2 0 6 15.22 1.02
-2 0 6 12.05 0.91
2 0 -6 13.93 0.69
2 0 -6 15.31 1.03
2 0 -6 14.17 0.76
-2 0 7 15.61 1.17
-2 0 7 19.75 1.16
-2 0 7 13.48 0.95
-2 0 7 20.85 1.22
-2 0 7 17.07 1.52
2 0 -7 15.06 1.2
-2 0 8 83.34 3.36
-2 0 8 82.4 2.71
-2 0 8 80.47 2.4
-2 0 8 82.6 2.6
-2 0 8 83.62 2.61
-2 0 9 2.74 0.93
-2 0 9 3.69 1.33
-2 0 9 1.62 0.77
-2 0 9 3.23 0.86
-2 0 9 2 0.71
-2 0 10 1.91 1.44
-2 0 10 3.5 1.11
-2 0 10 1.18 0.84
-2 0 10 1.29 0.9
-2 0 10 0.71 1.02
-2 0 10 1.56 1.11
-2 0 11 -1.43 1.21
-2 0 11 -1.55 1.38
-2 0 11 -1.57 1.2
-2 0 11 -3.31 1.78
-2 0 11 0.11 1.52
-2 0 11 0.83 1.77
-2 0 12 4.94 1.85
-2 0 12 2.05 1.89
-2 0 12 9.99 2.28
-2 0 12 3.71 2.44
1 1 12 3.04 2.56
1 1 12 -1.81 1.9
1 1 12 2.14 2.21
1 1 12 -0.22 1.54
1 1 11 9.14 1.44
1 1 11 8.23 1.36
1 1 11 12.79 2.25
1 1 11 7.81 2.07
1 1 11 9.53 1.44
1 1 10 4.11 1.03
1 1 10 4.42 1.04
1 1 10 2.22 1.61
1 1 10 2.97 0.97
1 1 10 4 1.52
1 1 9 27.43 1.62
1 1 9 23.54 2.17
1 1 9 24.04 1.39
1 1 9 23.06 1.61
1 1 9 26.27 2.28
1 1 8 26.39 2.01
1 1 8 26.07 1.92
1 1 8 24.25 1.4
1 1 7 46.84 1.54
1 1 7 46.6 1.75
1 1 7 49.06 2.2
1 1 7 52.75 2.37
1 1 6 162.46 4.6
1 1 6 167.65 3.94
1 1 6 170.49 3.92
1 1 5 92.75 2.41
1 1 5 98.87 2.37
1 1 5 91.87 2.86
1 1 4 73.08 1.76
1 1 4 70.34 1.86
1 1 4 70.32 2.21
1 1 3 198.76 4.73
1 1 3 210.16 4.28
1 1 2 722.03 14.97
-1 -1 -1 281.15 5.45
1 1 1 276.81 5.71
1 1 1 264.38 5.25
-1 -1 1 45.05 1.18
-1 -1 1 41.94 1.06
-1 -1 1 41.38 1.16
-1 -1 1 41.73 1.07
-1 -1 1 46.59 1.09
1 1 -1 40.97 1.02
1 1 -1 39.21 1.03
1 1 -1 41.86 1.12
1 1 -1 40.49 1.01
-1 -1 2 949.59 19.71
1 1 -2 990.38 20.52
-1 -1 3 122.17 2.71
-1 -1 3 120.66 2.7
-1 -1 3 120.36 2.95
-1 -1 3 117.56 2.74
-1 -1 3 114.69 3.1
1 1 -3 121.68 2.77
1 1 -3 121.88 2.69
1 1 -3 119.21 3.14
-1 -1 4 45.62 1.44
-1 -1 4 48.97 1.36
-1 -1 4 44.68 1.52
-1 -1 4 44.52 1.46
-1 -1 4 48.13 1.79
1 1 -4 50.92 1.85
1 1 -4 48.03 1.48
1 1 -4 45.6 1.32
1 1 -4 45.43 1.38
-1 -1 5 43.39 1.52
-1 -1 5 42.57 1.36
-1 -1 5 43.69 1.87
-1 -1 5 44.07 1.57
1 1 -5 42.46 1.48
1 1 -5 41.77 1.28
1 1 -5 41.67 1.36
-1 -1 6 31.35 1.37
-1 -1 6 27.69 1.36
-1 -1 6 29.05 1.73
-1 -1 6 30.3 1.21
-1 -1 6 26.98 1.39
1 1 -6 30.57 1.34
1 1 -6 28.79 1.1
1 1 -6 28.23 1.2
-1 -1 7 35.57 1.6
-1 -1 7 35.9 1.65
-1 -1 7 35.65 1.49
-1 -1 7 37.2 1.71
-1 -1 7 38.58 2.12
1 1 -7 34.73 1.27
1 1 -7 36.01 1.4
1 1 -7 37.55 1.63
-1 -1 8 17.98 1.49
-1 -1 8 17.87 1.38
-1 -1 8 21.48 1.36
-1 -1 8 21.49 1.92
-1 -1 8 19.12 1.38
1 1 -8 18.68 1.15
1 1 -8 16.75 1
1 1 -8 19.12 1.43
-1 -1 9 3.5 1
-1 -1 9 3.36 0.91
-1 -1 9 2.08 0.91
-1 -1 9 2.26 0.92
-1 -1 9 3.04 0.96
-1 -1 9 1.87 1.22
1 1 -9 2.17 1.01
-1 -1 10 9.02 1.45
-1 -1 10 10.62 1.38
-1 -1 10 8.8 1.82
-1 -1 10 10.78 1.32
-1 -1 10 9.88 1.49
-1 -1 10 8.67 1.35
-1 -1 11 1.03 1.35
-1 -1 11 2 1.68
-1 -1 11 -0.11 1.72
-1 -1 11 0.47 1.12
-1 -1 11 -1.3 1.22
-1 -1 11 -1.81 1.91
-1 -1 11 -0.11 1.12
-1 -1 11 0.77 1.36
-1 -1 12 1.51 2.51
-1 -1 12 1.21 1.94
-1 -1 12 0.14 1.66
-1 -1 12 2.59 2.06
-1 -1 12 2.04 2.09
0 2 12 3.17 2.5
0 2 12 4 1.89
0 2 12 9.56 1.71
0 2 12 10 2.43
0 2 11 5.18 1.35
0 2 11 3.21 1.43
0 2 11 3.26 1.23
0 2 11 4.56 2.07
0 2 11 2.51 1.13
0 2 11 7.69 1.79
0 2 10 5.41 1.01
0 2 10 6.68 1.29
0 2 10 7.1 1.75
0 2 10 5.32 1.17
0 2 10 6.31 1.02
0 2 10 6.91 1.68
0 2 9 19.97 2.05
0 2 9 13.94 1.45
0 2 9 15.24 1.87
0 2 9 15.4 1.11
0 2 8 10.13 1.4
0 2 8 8.17 1.29
0 2 8 9.76 1.18
0 2 7 44.53 1.76
0 2 7 43.19 2.02
0 2 7 46.95 2.18
0 2 6 18.97 1.09
0 2 6 21.18 1.42
0 2 5 106.7 2.75
0 2 5 108.96 3.14
0 2 4 146.29 3.72
0 2 4 145.17 3.37
0 2 3 424.84 8.56
0 2 3 426.5 8.89
0 2 2 748.04 14.4
0 2 2 768.31 15.32
0 -2 -1 125.91 2.48
0 -2 -1 124.99 2.8
0 -2 -1 125.86 2.83
0 2 1 138.6 2.85
0 2 1 138.04 2.82
0 2 1 125.97 2.71
0 2 1 141.67 3.02
0 2 1 139.14 2.69
0 -2 0 68.14 1.56
0 -2 0 62.42 1.62
0 -2 0 62.26 1.55
0 -2 0 59.24 1.48
0 -2 0 63.28 1.55
0 2 0 72.21 1.75
0 2 0 74.89 1.77
0 2 0 73.31 1.7
0 2 0 74.95 1.64
0 2 0 73.08 1.77
0 2 0 73.65 1.71
0 -2 1 126.02 2.82
0 -2 1 119.23 2.84
0 -2 1 120.71 2.76
0 -2 1 124.51 2.92
0 2 -1 138.56 3.17
0 2 -1 139.81 3.01
0 2 -1 137.52 3.24
0 2 -1 138.76 3.13
0 2 -1 139.36 3.01
0 -2 2 695.78 15.06
0 -2 2 703.78 14.48
0 -2 2 722.6 14.6
0 -2 2 717.72 15.32
0 -2 2 720.09 13.99
0 -2 2 728.06 14.58
0 2 -2 737.94 14.53
0 2 -2 741.79 14.3
0 2 -2 728.74 15.65
0 2 -2 770.14 14.22
0 -2 3 407.12 8.95
0 -2 3 401.62 8.16
0 -2 3 400.35 8.4
0 -2 3 397.51 8.96
0 2 -3 430.01 9.39
0 2 -3 422.28 8.35
0 2 -3 416.41 8.54
0 2 -3 424.03 8.45
0 -2 4 146.62 3.8
0 -2 4 149.84 3.5
0 -2 4 149.99 4.02
0 -2 4 148.2 3.47
0 2 -4 141.52 3.31
0 2 -4 140.87 3.85
0 2 -4 140.86 3.3
0 -2 5 98.59 3.16
0 -2 5 95.29 2.59
0 -2 5 101.52 2.61
0 -2 5 97.66 2.87
0 -2 5 99.51 2.97
0 2 -5 103.21 2.54
0 2 -5 100.41 3.21
0 2 -5 100.43 2.63
0 2 -5 101.82 2.64
0 -2 6 16.45 1.15
0 -2 6 14.93 1.21
0 -2 6 17.06 1.23
0 -2 6 14.86 1.04
0 -2 6 16.13 1.42
0 -2 6 17.72 1.05
0 2 -6 18.21 1.15
0 2 -6 18.28 1.6
0 2 -6 18.52 1.14
0 2 -6 17.51 0.96
0 -2 7 37.39 1.91
0 -2 7 45.04 1.76
0 -2 7 38.88 1.88
0 -2 7 41.11 1.87
0 -2 7 41.09 1.73
0 -2 7 42.73 2.28
0 2 -7 43.43 1.78
0 2 -7 41.97 1.71
0 2 -7 42.55 1.56
0 -2 8 11.3 1.26
0 -2 8 9.39 1.54
0 -2 8 9.06 1.16
0 -2 8 6.91 1.07
0 -2 8 10.35 1.13
0 -2 8 7.34 1.12
0 2 -8 9.61 1.15
0 2 -8 8.49 1.01
0 2 -8 9.29 1.01
0 -2 9 14.03 1.67
0 -2 9 14.75 1.49
0 -2 9 15.21 1.67
0 -2 9 19.05 2.43
0 -2 9 15.61 1.67
0 -2 9 15.52 1.77
0 2 -9 13.93 1.57
0 2 -9 13.92 1.23
0 -2 10 3.95 1.22
0 -2 10 5.55 1.83
0 -2 10 6.64 1.37
0 -2 10 5.6 1.21
0 -2 10 5.25 1.38
0 -2 10 3.84 1.29
0 -2 10 5.49 1.56
0 -2 11 9.34 2.09
0 -2 11 3.13 2.23
0 -2 11 3.95 1.58
0 -2 11 5.98 1.63
0 -2 11 3.62 1.29
0 -2 11 5.47 1.45
0 -2 11 5.1 1.45
0 -2 11 0.22 1.87
0 -2 12 6.62 2.6
0 -2 12 4.75 1.59
0 -2 12 0.48 2.24
0 -2 12 7.65 2.2
0 -2 12 8.23 1.67
0 -2 12 6.84 2.72
-1 3 12 4.35 2.55
-1 3 12 8.34 2.3
-1 3 12 3.51 1.72
-1 3 12 6.63 1.83
-1 3 11 2.17 1.34
-1 3 11 1.82 1.72
-1 3 11 2.12 1.95
-1 3 11 4.81 1.34
-1 3 10 5.61 1.72
-1 3 10 5.8 1.21
-1 3 10 4.07 1.53
-1 3 10 5.59 1.3
-1 3 9 2.71 1.14
-1 3 9 0.81 0.9
-1 3 9 1.38 0.9
-1 3 9 3.35 1.12
-1 3 8 27.95 1.65
-1 3 8 27.55 1.82
-1 3 8 30.76 2.05
-1 3 8 29.54 1.64
-1 3 7 27.36 1.45
-1 3 7 27.97 1.66
-1 3 7 30.28 1.49
-1 3 7 27.75 1.76
-1 3 6 29.65 1.62
-1 3 6 25.47 1.29
-1 3 6 27.57 1.35
-1 3 6 25.63 1.39
-1 3 5 108.14 2.86
-1 3 5 111.5 3.16
-1 3 5 106.74 2.85
-1 3 4 50.13 1.58
-1 3 4 50.36 1.62
-1 3 3 7.28 0.59
-1 3 3 7.34 0.57
1 -3 -2 19.99 0.82
1 -3 -2 20.01 0.71
-1 3 2 21.09 0.64
-1 3 2 19.9 0.8
-1 3 2 19.56 0.62
1 -3 -1 325.58 6.11
1 -3 -1 279.98 6.22
1 -3 -1 297.26 6.56
1 -3 -1 281.03 6.03
-1 3 1 284.86 5.9
-1 3 1 282.81 5.96
-1 3 1 285.99 5.6
-1 3 1 286.5 6.04
1 -3 0 956.74 19.24
1 -3 0 918.04 17.07
1 -3 0 808.42 18.59
1 -3 0 908.92 18.2
1 -3 0 918.19 18.2
1 -3 0 896.31 18.11
-1 3 0 906.7 18.93
-1 3 0 924.23 18.51
1 -3 1 105.67 2.72
1 -3 1 104.1 2.56
1 -3 1 105.37 2.68
1 -3 1 110.22 2.48
1 -3 1 108.96 2.64
-1 3 -1 119.29 2.68
-1 3 -1 116.39 2.79
-1 3 -1 121.09 2.93
-1 3 -1 116.57 2.95
1 -3 2 6.71 0.76
1 -3 2 6.34 0.73
1 -3 2 6.14 0.71
1 -3 2 6.89 0.61
1 -3 2 6.78 0.61
1 -3 2 7.11 0.68
-1 3 -2 6.71 0.59
-1 3 -2 5.94 0.74
-1 3 -2 6.68 0.71
-1 3 -2 5.85 0.61
-1 3 -2 6.27 0.7
1 -3 3 135.46 3.76
1 -3 3 138.32 3.57
1 -3 3 147.79 3.74
1 -3 3 146.3 3.86
1 -3 3 147.58 3.58
1 -3 3 140.22 3.43
-1 3 -3 144.76 3.94
-1 3 -3 157.58 3.61
-1 3 -3 152.17 3.48
1 -3 4 558.04 12.35
1 -3 4 545.92 11.64
1 -3 4 535.11 12.17
1 -3 4 536.7 11.43
1 -3 4 546.83 11.06
1 -3 4 542.15 12.17
-1 3 -4 541.25 12.19
-1 3 -4 552.8 10.87
-1 3 -4 542.52 11.05
-1 3 -4 548.68 11.01
1 -3 5 131.94 3.53
1 -3 5 129.4 3.87
1 -3 5 131.85 3.33
1 -3 5 122.96 3.72
1 -3 5 122.69 3.6
1 -3 5 125.84 3.22
-1 3 -5 123.53 3.16
-1 3 -5 133.02 3.88
-1 3 -5 121.9 3.25
1 -3 6 52.48 2.23
1 -3 6 49.89 2.13
1 -3 6 53.24 2.1
1 -3 6 50.04 1.89
1 -3 6 52.15 1.86
1 -3 6 49.48 2.37
-1 3 -6 49.86 2.4
-1 3 -6 49.66 1.72
-1 3 -6 49.71 1.82
-1 3 -6 48.99 1.9
1 -3 7 3.42 0.92
1 -3 7 4.24 0.82
1 -3 7 3.58 1.02
1 -3 7 3.49 0.86
1 -3 7 4.6 0.93
1 -3 7 4.12 0.92
-1 3 -7 3.78 0.86
-1 3 -7 3.12 0.86
-1 3 -7 4.61 1.3
-1 3 -7 4.33 0.76
1 -3 8 20.17 1.8
1 -3 8 18.55 1.7
1 -3 8 20.65 1.45
1 -3 8 20.81 1.7
1 -3 8 14.83 1.57
1 -3 8 21.71 2.16
-1 3 -8 21.24 1.54
-1 3 -8 21.57 1.39
1 -3 9 28.8 2.4
1 -3 9 26.6 1.8
1 -3 9 27.01 2.15
1 -3 9 27.81 2.04
1 -3 9 22.76 2.14
1 -3 9 25.28 2.05
1 -3 9 27.06 2.71
-1 3 -9 27.06 1.9
-1 3 -9 28.4 1.66
-1 3 -9 25.83 1.88
1 -3 10 9.67 1.58
1 -3 10 9.23 1.62
1 -3 10 10.61 1.66
1 -3 10 13.45 2.24
1 -3 10 14.31 1.78
1 -3 10 10.09 1.91
1 -3 10 7.48 1.81
1 -3 10 10.79 1.46
-1 3 -10 9.83 1.4
-1 3 -10 8.71 1.19
-1 3 -10 11.34 1.61
1 -3 11 3.75 1.42
1 -3 11 3.34 1.84
1 -3 11 4.75 2.3
1 -3 11 2.6 1.63
1 -3 11 -0.06 1.82
1 -3 11 0.96 2.05
1 -3 11 2.95 2.17
-1 3 -11 2.75 1.27
1 -3 12 1.23 1.76
1 -3 12 4.83 2.34
1 -3 12 1.14 2.97
1 -3 12 0.52 2.56
-2 4 12 -1.49 2.17
-2 4 12 3.08 2.55
-2 4 12 1.12 1.59
-2 4 12 0.23 1.96
-2 4 11 11.06 1.53
-2 4 11 7.05 1.84
-2 4 11 4.84 1.62
-2 4 11 5.49 2.03
-2 4 10 10.83 1.48
-2 4 10 10.34 1.35
-2 4 10 9.18 1.9
-2 4 10 8.3 1.53
-2 4 9 4.55 1
-2 4 9 4.78 1.35
-2 4 9 4.92 1.13
-2 4 9 3.69 1.21
-2 4 8 16.09 1.6
-2 4 8 16.06 1.52
-2 4 8 15.86 1.79
-2 4 8 16.83 1.3
-2 4 7 1.89 0.75
-2 4 7 1.58 0.85
-2 4 7 1.84 0.63
-2 4 7 1.12 0.66
-2 4 6 44.14 1.76
-2 4 6 43.21 1.94
-2 4 6 42.59 1.63
-2 4 6 40.68 1.65
-2 4 5 56.11 1.91
-2 4 5 55.2 1.78
-2 4 5 57.67 1.83
-2 4 4 61.74 1.68
-2 4 4 58.02 1.79
2 -4 -3 122.99 3
2 -4 -3 120.14 2.87
2 -4 -3 123.21 2.86
-2 4 3 119.26 2.61
-2 4 3 121.55 2.96
-2 4 3 123.38 2.57
2 -4 -2 34.89 1.26
2 -4 -2 34.71 1.2
-2 4 2 31.75 1.05
-2 4 2 32.44 0.97
-2 4 2 31.64 1.15
-2 4 2 33.83 0.99
2 -4 -1 278.71 5.59
2 -4 -1 280.52 6.37
2 -4 -1 274.72 5.81
2 -4 -1 278.85 5.89
2 -4 -1 271.65 6
-2 4 1 283.12 6.32
-2 4 1 288.65 5.75
-2 4 1 285.12 6.05
-2 4 1 281.28 6.17
-2 4 1 288.09 6.17
2 -4 0 42.19 1.43
2 -4 0 41.93 1.42
2 -4 0 42.65 1.33
2 -4 0 43.24 1.32
2 -4 0 45.61 1.44
2 -4 0 43.68 1.58
-2 4 0 40.76 1.31
-2 4 0 41.49 1.39
-2 4 0 40.55 1.27
-2 4 0 42.92 1.44
-2 4 0 43.05 1.46
2 -4 1 282.76 6.2
2 -4 1 270.77 6.09
2 -4 1 282.89 5.82
2 -4 1 290.42 6.68
2 -4 1 282.64 6.26
2 -4 1 269.61 6.35
-2 4 -1 286.21 6.41
-2 4 -1 297.47 6.36
-2 4 -1 280.01 6.52
-2 4 -1 282.71 5.93
2 -4 2 314.24 7.35
2 -4 2 318.6 6.99
2 -4 2 318.96 6.64
2 -4 2 321 7.61
2 -4 2 328.72 7.12
-2 4 -2 324.8 6.82
-2 4 -2 333.17 6.96
-2 4 -2 332.38 7.01
-2 4 -2 330.58 7.35
2 -4 3 179.58 4.13
2 -4 3 176.58 4.67
2 -4 3 183.79 4.46
2 -4 3 181.68 4.51
2 -4 3 174.17 4.29
2 -4 3 183.99 4.81
-2 4 -3 180.39 4.2
-2 4 -3 179.05 4.75
-2 4 -3 183.73 4.37
-2 4 -3 192.34 4.22
2 -4 4 183.01 4.67
2 -4 4 174.31 4.89
2 -4 4 185.92 4.65
2 -4 4 182.58 4.99
2 -4 4 185.18 4.48
2 -4 4 190.08 4.88
-2 4 -4 199.25 4.69
-2 4 -4 192.34 4.48
-2 4 -4 197.68 4.49
-2 4 -4 191.96 5.18
2 -4 5 191.38 5.36
2 -4 5 190.94 5.01
2 -4 5 199.91 5.38
2 -4 5 188.29 4.78
2 -4 5 196.81 5.21
2 -4 5 201.72 5.05
-2 4 -5 194.66 4.5
-2 4 -5 185.79 4.46
-2 4 -5 190.81 4.67
-2 4 -5 188.86 5.28
2 -4 6 158.06 4.77
2 -4 6 155.94 4.36
2 -4 6 149.96 4.33
2 -4 6 161.12 4.14
2 -4 6 152.48 4.48
2 -4 6 147.42 4.58
-2 4 -6 152.87 4.06
-2 4 -6 151.5 3.87
-2 4 -6 159.65 4.79
-2 4 -6 151.58 3.85
2 -4 7 19.42 1.55
2 -4 7 22.86 1.71
2 -4 7 25.39 2.08
2 -4 7 19.74 1.83
2 -4 7 22.19 1.8
2 -4 7 18.38 1.78
-2 4 -7 21.5 2.18
-2 4 -7 19.88 1.44
2 -4 8 31.69 2.02
2 -4 8 31.52 2.16
2 -4 8 30.4 2.19
2 -4 8 28.69 2.33
2 -4 8 32.33 2.53
2 -4 8 33.25 2.27
-2 4 -8 31.48 1.71
-2 4 -8 32.07 1.8
2 -4 9 14.43 2.11
2 -4 9 15.21 2.03
2 -4 9 15.06 2.01
2 -4 9 14.07 1.73
2 -4 9 9.86 1.51
2 -4 9 12.73 1.87
-2 4 -9 12.92 1.58
-2 4 -9 13.73 1.74
-2 4 -9 13.41 1.37
2 -4 10 11.5 1.81
2 -4 10 15.53 2.25
2 -4 10 12.88 1.86
2 -4 10 12.97 1.89
2 -4 10 13.08 2.19
2 -4 10 11.55 1.84
2 -4 10 11.57 2.33
-2 4 -10 12.97 1.49
-2 4 -10 10.09 1.59
2 -4 11 11.19 2.04
2 -4 11 7.3 2.57
2 -4 11 9.47 2.14
2 -4 11 7.26 2.36
2 -4 11 9.84 2.26
2 -4 11 9.45 2.13
-3 5 11 6.46 1.75
-3 5 11 8.24 1.92
-3 5 11 7.52 2.16
-3 5 11 4.82 1.37
-3 5 10 18.61 1.8
-3 5 10 17.15 2.26
-3 5 10 18.04 2.06
-3 5 10 18.33 2.53
-3 5 9 1.25 1.04
-3 5 9 2.76 0.9
-3 5 9 2.43 1.28
-3 5 9 3.76 1.09
-3 5 8 6.11 1.01
-3 5 8 6.47 1.13
-3 5 8 7.16 1.29
-3 5 8 5.75 0.92
-3 5 7 10.08 1.09
-3 5 7 13.69 1.43
-3 5 7 9.13 1.17
-3 5 7 11.71 1.3
-3 5 6 96.75 2.68
-3 5 6 96.62 2.97
-3 5 6 97.3 2.75
-3 5 5 21.96 1.07
-3 5 5 21.92 1.11
-3 5 5 22.73 1.29
-3 5 4 50.65 1.42
-3 5 4 49.46 1.66
-3 5 4 51.28 1.41
-3 5 4 52.57 1.34
-3 5 4 53.48 1.35
3 -5 -3 55.55 1.75
-3 5 3 58.58 1.65
-3 5 3 57.73 1.52
-3 5 3 57.98 1.78
-3 5 3 58.91 1.56
3 -5 -2 11.4 0.5
3 -5 -2 12.2 0.91
3 -5 -2 12.02 0.83
-3 5 2 15.09 0.71
-3 5 2 12.22 0.7
-3 5 2 12.89 0.84
-3 5 2 15.44 0.88
3 -5 -1 45.57 1.54
3 -5 -1 43.94 1.36
3 -5 -1 40.9 1.63
3 -5 -1 45.18 1.4
3 -5 -1 45.97 1.44
-3 5 1 50.41 1.63
-3 5 1 50.92 1.55
-3 5 1 50.5 1.49
-3 5 1 49.71 1.71
-3 5 1 49.95 1.68
3 -5 0 32.2 1.22
3 -5 0 32.09 1.29
3 -5 0 31.09 1.3
3 -5 0 32.12 1.32
3 -5 0 30.21 1.42
3 -5 0 32.63 1.23
-3 5 0 37.01 1.46
-3 5 0 33.53 1.24
-3 5 0 34.99 1.46
-3 5 0 35.91 1.3
-3 5 0 36.33 1.38
3 -5 1 229.39 5.28
3 -5 1 231.85 5.82
3 -5 1 233.26 5.39
3 -5 1 234.03 5.45
3 -5 1 223 5.51
3 -5 1 234.47 5.06
-3 5 -1 220.88 5.42
-3 5 -1 230.59 5.26
-3 5 -1 219.32 5.33
3 -5 2 32.94 1.5
3 -5 2 33.58 1.64
3 -5 2 34.19 1.57
3 -5 2 38.32 1.57
3 -5 2 34.81 1.41
3 -5 2 35.03 1.43
-3 5 -2 31.51 1.56
-3 5 -2 31.73 1.53
3 -5 3 57.92 2.31
3 -5 3 56.74 2.09
3 -5 3 55.13 1.95
3 -5 3 56.95 2.2
3 -5 3 57.6 1.93
3 -5 3 56.41 2.1
-3 5 -3 53.83 1.81
-3 5 -3 52.25 2.16
-3 5 -3 53.98 2.03
-3 5 -3 50.5 2.02
-3 5 -3 52.27 1.82
3 -5 4 60.47 2.4
3 -5 4 56.91 2.08
3 -5 4 58.84 2.27
3 -5 4 57.8 2.4
3 -5 4 57.79 2.25
3 -5 4 59.17 2.33
-3 5 -4 54.13 1.9
-3 5 -4 57.47 2.18
-3 5 -4 54.4 2.36
-3 5 -4 56.49 1.93
3 -5 5 72.65 2.55
3 -5 5 77.8 2.81
3 -5 5 75.9 2.98
3 -5 5 82.83 3.06
3 -5 5 80.06 2.93
3 -5 5 80.17 2.84
-3 5 -5 78.14 2.7
-3 5 -5 74.9 3
-3 5 -5 71.61 2.37
-3 5 -5 77.94 2.42
3 -5 6 196.17 5.77
3 -5 6 199.95 5.43
3 -5 6 202.87 5.43
3 -5 6 197.17 5.74
3 -5 6 192.07 5.11
3 -5 6 200.93 5.61
-3 5 -6 194.66 4.84
-3 5 -6 196.95 5.13
-3 5 -6 198.72 5.84
-3 5 -6 208.96 4.93
3 -5 7 8.05 1.19
3 -5 7 7.93 1.47
3 -5 7 10.09 1.53
3 -5 7 8.31 1.29
3 -5 7 9.51 1.52
3 -5 7 9.54 1.48
-3 5 -7 5.69 0.95
-3 5 -7 7.21 1.09
3 -5 8 4.22 1.42
3 -5 8 3.21 1.15
3 -5 8 2.15 1.25
3 -5 8 2.12 1.1
3 -5 8 3.82 1.35
3 -5 8 3.92 1.3
-3 5 -8 2.87 1.02
-3 5 -8 1.79 1.56
3 -5 9 4.03 1.71
3 -5 9 1.58 1.42
3 -5 9 2.64 1.55
3 -5 9 3.88 1.42
3 -5 9 2.28 1.59
3 -5 9 1.39 1.36
-3 5 -9 1.51 1.02
-3 5 -9 2.22 1.9
-3 5 -9 2.83 1.2
-3 5 -9 2.25 1.41
3 -5 10 21.91 2.92
3 -5 10 21.23 2.42
3 -5 10 28 3.36
3 -5 10 26.32 3.29
3 -5 10 26.69 2.92
3 -5 10 30.03 2.97
3 -5 10 26.6 2.84
-3 5 -10 24.09 2.42
-3 5 -10 24.97 2.31
3 -5 11 3.55 2
3 -5 11 0.87 2.15
3 -5 11 2.62 2.7
3 -5 11 -0.39 1.83
-4 6 11 3.99 1.99
-4 6 11 4.61 1.25
-4 6 11 7.8 1.93
-4 6 11 2.86 1.75
-4 6 10 6.25 1.38
-4 6 10 4.66 1.55
-4 6 10 6.45 1.73
-4 6 10 3.5 1.12
-4 6 9 52.64 2.96
-4 6 9 48.88 2.32
-4 6 9 44.67 2.12
-4 6 9 45.12 2.45
-4 6 8 39.32 2.36
-4 6 8 41.12 2.19
-4 6 8 44.97 2.05
-4 6 8 42.65 1.86
-4 6 7 17.08 1.29
-4 6 7 16.25 1.23
-4 6 7 17.89 1.53
-4 6 6 10.1 1.25
-4 6 6 7.54 0.94
-4 6 6 7.53 0.97
-4 6 5 38.82 1.16
-4 6 5 36.79 1.18
-4 6 5 37.95 1.32
-4 6 5 35.21 1.48
-4 6 5 37.51 1.27
4 -6 -4 239.95 5.53
4 -6 -4 239.26 5.5
4 -6 -4 237.3 5.53
-4 6 4 249.71 5.55
-4 6 4 236.16 5.21
-4 6 4 231.03 5.32
-4 6 4 242.36 4.98
4 -6 -3 13.67 0.97
4 -6 -3 14.25 0.96
-4 6 3 10.37 0.73
-4 6 3 14.27 0.77
-4 6 3 11.87 0.9
-4 6 3 15.1 0.97
4 -6 -2 71.25 2.18
4 -6 -2 72.12 1.98
4 -6 -2 70.42 2.3
4 -6 -2 73.07 1.83
4 -6 -2 73.33 1.88
-4 6 2 74.11 2.26
-4 6 2 74.66 2.03
-4 6 2 72.29 2.2
-4 6 2 75.8 2.39
-4 6 2 76.74 2.11
4 -6 -1 3.53 0.58
4 -6 -1 3.27 0.55
4 -6 -1 3.05 0.51
4 -6 -1 3.82 0.67
4 -6 -1 4.36 0.76
-4 6 1 3.56 0.55
-4 6 1 3.16 0.58
-4 6 1 4.07 0.75
-4 6 1 2.53 0.46
-4 6 1 3.96 0.74
4 -6 0 112.77 3.09
4 -6 0 110.42 3.05
4 -6 0 107.76 2.92
4 -6 0 113.8 3.37
4 -6 0 115.29 2.9
4 -6 0 107.55 3.11
-4 6 0 116.58 3.32
-4 6 0 120.99 2.99
-4 6 0 121 3.21
-4 6 0 112.74 3.3
4 -6 1 119.25 3.32
4 -6 1 117.13 3.59
4 -6 1 122.07 3.21
4 -6 1 121.21 3.36
4 -6 1 118.95 3.1
4 -6 1 117.73 3.38
-4 6 -1 127.62 3.57
-4 6 -1 124.63 3.42
-4 6 -1 124.32 3.18
-4 6 -1 125.77 3.59
4 -6 2 16.68 1.19
4 -6 2 14.58 1.17
4 -6 2 15.56 1.19
4 -6 2 14.27 1.08
4 -6 2 15.5 1.1
4 -6 2 16.35 1.3
-4 6 -2 14.09 1.27
-4 6 -2 15.13 0.98
-4 6 -2 14.97 1.32
4 -6 3 83.94 2.64
4 -6 3 83.94 2.59
4 -6 3 84.25 2.92
4 -6 3 84.22 2.83
4 -6 3 84 2.79
4 -6 3 82.2 3.03
-4 6 -3 88.97 2.63
-4 6 -3 88.5 2.68
-4 6 -3 90.74 2.97
-4 6 -3 85.54 2.89
-4 6 -3 89.59 3.09
4 -6 4 17.73 1.36
4 -6 4 16.65 1.46
4 -6 4 15.51 1.46
4 -6 4 14.84 1.44
4 -6 4 14.93 1.5
4 -6 4 16.26 1.38
-4 6 -4 13.18 1.44
-4 6 -4 14.59 1.08
-4 6 -4 14.14 1.23
-4 6 -4 13.73 1.56
4 -6 5 9.98 1.39
4 -6 5 10.28 1.41
4 -6 5 11.49 1.29
4 -6 5 10.78 1.41
4 -6 5 10.44 1.36
4 -6 5 13.17 1.53
-4 6 -5 12.93 1.54
-4 6 -5 9.77 1.1
-4 6 -5 11.1 1.49
-4 6 -5 12.1 1.31
4 -6 6 12.23 1.6
4 -6 6 13.31 1.8
4 -6 6 11.73 1.54
4 -6 6 12 1.56
4 -6 6 11.09 1.61
4 -6 6 15.51 1.76
-4 6 -6 12.41 1.56
-4 6 -6 13.83 1.47
-4 6 -6 13.6 1.31
4 -6 7 15.16 1.86
4 -6 7 15.88 1.97
4 -6 7 19.58 2.22
4 -6 7 21.73 2.24
4 -6 7 20.47 1.91
4 -6 7 18.2 2.16
-4 6 -7 18.57 1.65
-4 6 -7 18.09 1.54
4 -6 8 30.52 2.74
4 -6 8 34.62 2.75
4 -6 8 35.43 2.52
4 -6 8 35.64 2.88
4 -6 8 33.98 2.56
4 -6 8 35.89 2.78
-4 6 -8 34.37 3.24
-4 6 -8 29.33 2.04
-4 6 -8 31.84 2.13
4 -6 9 -0.55 1.61
4 -6 9 -0.34 1.49
4 -6 9 -1.26 1.69
4 -6 9 0.45 1.45
4 -6 9 1.64 1.58
4 -6 9 0.66 1.79
4 -6 9 0.65 1.4
-4 6 -9 0.21 1.32
-4 6 -9 -1.97 1.08
-4 6 -9 0.36 2.07
4 -6 10 1.64 1.85
4 -6 10 4.17 2.22
4 -6 10 7.6 1.99
4 -6 10 0.08 1.77
4 -6 10 5.68 1.96
-4 6 -10 0.46 1.72
4 -6 11 2.23 2.87
4 -6 11 2.84 2.39
4 -6 11 3.17 2.71
4 -6 11 1.9 2.27
-5 7 11 6.17 1.9
-5 7 11 8.69 2.23
-5 7 11 6.75 2.04
-5 7 10 2.96 1.81
-5 7 10 0.33 1.24
-5 7 10 2.22 1.46
-5 7 10 0.14 1.11
-5 7 9 7.25 1.41
-5 7 9 7.85 1.21
-5 7 9 7.46 1.6
-5 7 9 7.3 1.22
-5 7 8 5.88 1.21
-5 7 8 5.79 0.92
-5 7 8 5.38 1.24
-5 7 8 5.04 0.98
-5 7 7 58.56 1.96
-5 7 7 59.46 2.56
-5 7 7 59.04 2.18
-5 7 6 35.45 1.61
-5 7 6 34.7 1.33
-5 7 6 38.09 1.97
-5 7 6 38.3 1.54
5 -7 -5 101.66 2.64
5 -7 -5 97.68 2.63
-5 7 5 103.79 2.52
-5 7 5 101.63 2.9
-5 7 5 101.25 2.81
5 -7 -4 70.33 2.29
5 -7 -4 72 2.23
-5 7 4 65.73 2.16
-5 7 4 66.06 1.89
-5 7 4 66.45 2.14
5 -7 -3 130.53 3.44
5 -7 -3 126.01 3.59
-5 7 3 131.93 3.52
-5 7 3 131.92 3.48
-5 7 3 131.04 3.18
5 -7 -2 185.01 4.79
5 -7 -2 176.74 4.08
5 -7 -2 178.57 4.16
5 -7 -2 183.12 4.17
5 -7 -2 177.95 4.47
-5 7 2 178.67 4.1
-5 7 2 183.33 4.43
-5 7 2 172.49 4.61
-5 7 2 171.97 4.48
5 -7 -1 54 2.12
5 -7 -1 51.65 1.95
5 -7 -1 51.16 1.79
5 -7 -1 52.66 1.81
5 -7 -1 48.94 1.71
-5 7 1 45.91 1.97
-5 7 1 50.03 1.86
-5 7 1 48.78 2.01
-5 7 1 52.39 1.73
5 -7 0 128.16 3.33
5 -7 0 124.22 3.37
5 -7 0 128.8 3.55
5 -7 0 128.41 3.86
5 -7 0 125.8 2.83
5 -7 0 128.09 3.51
-5 7 0 130.87 3.35
-5 7 0 132.03 3.78
-5 7 0 128.59 3.78
-5 7 0 134.01 3.61
5 -7 1 30.42 1.59
5 -7 1 33.42 1.54
5 -7 1 29.97 1.7
5 -7 1 31.31 1.54
5 -7 1 34.34 1.67
5 -7 1 31.24 1.61
-5 7 -1 35.33 1.48
-5 7 -1 34.08 1.82
-5 7 -1 33.82 1.79
5 -7 2 43.61 1.83
5 -7 2 37.74 1.78
5 -7 2 40.01 1.91
5 -7 2 37.79 1.85
5 -7 2 41.91 2.1
5 -7 2 44.38 1.95
-5 7 -2 37.17 1.98
-5 7 -2 39.08 1.6
-5 7 -2 38.32 2.03
5 -7 3 58.13 2.22
5 -7 3 56.54 2.57
5 -7 3 59.7 2.47
5 -7 3 56.75 2.38
5 -7 3 57.24 2.4
5 -7 3 59.82 2.27
-5 7 -3 60.43 2.62
-5 7 -3 57.8 2.24
-5 7 -3 53.57 2.43
-5 7 -3 60.01 2.12
-5 7 -3 57.05 2.49
5 -7 4 15.93 1.66
5 -7 4 16.97 1.56
5 -7 4 17.61 1.6
5 -7 4 18.15 1.74
5 -7 4 16.14 1.49
5 -7 4 14.67 1.65
-5 7 -4 16.97 1.27
-5 7 -4 17.56 1.87
-5 7 -4 17.94 1.46
-5 7 -4 14.99 1.67
5 -7 5 24.59 1.97
5 -7 5 29.78 2.01
5 -7 5 25.6 2.13
5 -7 5 27.05 2.12
5 -7 5 26.54 1.86
5 -7 5 27.77 2.08
-5 7 -5 28.74 2.31
-5 7 -5 27.93 1.61
-5 7 -5 27.4 2.12
-5 7 -5 27.53 1.76
5 -7 6 7.67 1.47
5 -7 6 8.07 1.33
5 -7 6 8.59 1.56
5 -7 6 7.23 1.49
5 -7 6 8.69 1.55
5 -7 6 6.33 1.52
-5 7 -6 9.62 1.33
-5 7 -6 7.51 1.1
-5 7 -6 7.12 1.39
5 -7 7 37.86 2.86
5 -7 7 35.31 2.49
5 -7 7 39.34 2.69
5 -7 7 33.94 2.72
5 -7 7 30.35 2.69
5 -7 7 35.79 2.87
-5 7 -7 37.63 2.1
-5 7 -7 35.7 2.7
-5 7 -7 33.17 2.14
5 -7 8 3.34 1.7
5 -7 8 3.02 1.77
5 -7 8 4.91 1.53
5 -7 8 2.09 1.43
5 -7 8 4.41 1.73
5 -7 8 0.48 1.63
5 -7 8 3.13 1.6
-5 7 -8 1.18 1.3
-5 7 -8 2.64 2.1
-5 7 -8 3.4 1.59
-5 7 -8 2.58 1.18
5 -7 9 4.87 2.2
5 -7 9 4.72 2.01
5 -7 9 5.8 1.88
5 -7 9 7.18 2.06
5 -7 9 4.21 1.95
5 -7 9 7.85 1.93
5 -7 9 2.54 1.98
-5 7 -9 8.04 1.71
-5 7 -9 5.58 1.5
5 -7 10 6.33 2.1
5 -7 10 5.73 2.58
5 -7 10 6.38 2.22
5 -7 10 3.51 2.07
-6 8 11 5.45 2.44
-6 8 11 0.54 2.09
-6 8 10 4.63 1.79
-6 8 10 1.36 1.1
-6 8 10 0.66 1.19
-6 8 10 3.12 1.87
-6 8 9 0.92 1
-6 8 9 0.85 1.03
-6 8 9 0.09 1.45
-6 8 9 0.47 1.44
-6 8 8 7.79 0.93
-6 8 8 8.21 1.15
-6 8 8 9.58 1.51
-6 8 8 8.47 1.14
-6 8 7 58.98 2.21
-6 8 7 56.79 2.75
-6 8 7 55.99 2.14
-6 8 6 6.27 0.71
-6 8 6 5.49 0.99
-6 8 6 5.8 1.08
-6 8 6 5.77 0.92
6 -8 -5 9.29 1.04
6 -8 -5 8.55 1.12
6 -8 -5 10.57 1.28
-6 8 5 9.67 0.88
-6 8 5 9.83 1.12
-6 8 5 8.93 1.08
6 -8 -4 33.49 1.66
6 -8 -4 32.55 1.64
6 -8 -4 30.84 1.58
-6 8 4 33.72 1.37
-6 8 4 33.39 1.58
-6 8 4 32.75 1.72
6 -8 -3 196.24 4.94
6 -8 -3 197.82 5.2
-6 8 3 182.58 4.78
-6 8 3 195.04 4.97
-6 8 3 195.66 4.49
-6 8 3 199.82 5.21
6 -8 -2 119.44 3.43
6 -8 -2 117.39 3
6 -8 -2 118.26 3.07
6 -8 -2 118.95 3.66
-6 8 2 116.86 3.09
-6 8 2 115.48 3.58
-6 8 2 117.1 3.35
-6 8 2 115.81 3.5
6 -8 -1 14.83 1.07
6 -8 -1 15.12 1.34
6 -8 -1 14.94 1.28
6 -8 -1 14.88 1.21
6 -8 -1 16.18 1.13
-6 8 1 14.5 1.19
-6 8 1 15.5 1.44
-6 8 1 15.15 1.43
-6 8 1 15.11 1.07
6 -8 0 30.22 1.78
6 -8 0 30.71 1.59
6 -8 0 30.09 1.71
6 -8 0 31.56 1.6
6 -8 0 29.73 1.06
6 -8 0 29.21 1.54
-6 8 0 31.03 1.62
-6 8 0 28.85 1.87
-6 8 0 33.16 1.51
-6 8 0 30.37 1.8
6 -8 1 128.29 3.69
6 -8 1 131.65 3.88
6 -8 1 133.58 3.64
6 -8 1 129.9 3.92
6 -8 1 133.13 4.22
6 -8 1 127.81 3.82
6 -8 1 129.84 3.16
-6 8 -1 121.32 3.9
-6 8 -1 121.68 3.88
-6 8 -1 128.52 3.45
6 -8 2 198.29 5.25
6 -8 2 196.6 5.65
6 -8 2 191.93 4.53
6 -8 2 192.36 5.02
6 -8 2 191 4.87
6 -8 2 185.2 5.17
6 -8 2 187.54 5.31
-6 8 -2 193.72 4.62
-6 8 -2 149.61 4.9
-6 8 -2 190.21 5.25
6 -8 3 75.97 3.19
6 -8 3 79.35 3.07
6 -8 3 75.87 2.97
6 -8 3 78.3 2.84
6 -8 3 77.21 2.97
-6 8 -3 84.97 3.22
-6 8 -3 77.24 2.65
-6 8 -3 80.75 3.2
-6 8 -3 79.62 3.27
6 -8 4 8.34 1.34
6 -8 4 8.21 1.31
6 -8 4 8.33 1.44
6 -8 4 9.82 1.46
6 -8 4 6.49 1.16
6 -8 4 8.61 1.37
-6 8 -4 6.49 1.35
-6 8 -4 6.63 1.45
-6 8 -4 7.89 1.33
-6 8 -4 6.71 0.95
-6 8 -4 8.98 1.35
6 -8 5 1.72 1.1
6 -8 5 1.36 1.04
6 -8 5 0.56 1
6 -8 5 0.61 1.24
6 -8 5 1.58 1.13
6 -8 5 3.4 1.23
-6 8 -5 -0.78 0.94
-6 8 -5 0.32 0.77
-6 8 -5 1.67 1.29
-6 8 -5 0.21 1.31
6 -8 6 25.92 2.52
6 -8 6 25.68 2.31
6 -8 6 29.68 2.62
6 -8 6 32.52 2.65
6 -8 6 27.08 2.11
6 -8 6 26.76 2.4
6 -8 6 24.32 2.6
-6 8 -6 31.1 2.61
-6 8 -6 31.78 1.87
-6 8 -6 24.74 2.08
6 -8 7 24 2.79
6 -8 7 26.94 2.68
6 -8 7 27.67 2.47
6 -8 7 27.74 2.99
6 -8 7 25.1 2.78
6 -8 7 24.88 2.49
6 -8 7 23.53 2.69
-6 8 -7 26.34 2.05
-6 8 -7 26.88 2.5
-6 8 -7 23.33 2.26
6 -8 8 1.4 1.93
6 -8 8 2.35 2.08
6 -8 8 5.3 1.77
6 -8 8 2.14 1.86
6 -8 8 2.16 1.64
6 -8 8 2.37 1.69
6 -8 8 3.14 1.53
-6 8 -8 3.66 1.36
-6 8 -8 5.67 1.6
6 -8 9 4.08 2.18
6 -8 9 0.72 1.9
6 -8 9 4.6 2.45
6 -8 9 -0.29 1.98
6 -8 9 4.89 2.29
-6 8 -9 3.49 1.87
-6 8 -9 -0.84 1.61
6 -8 10 1.65 2.47
6 -8 10 2.84 2.5
6 -8 10 4.84 3.01
6 -8 10 -2.91 2.43
-7 9 10 3.04 1.81
-7 9 10 3.98 1.15
-7 9 10 3.87 2.08
-7 9 9 3.25 1.69
-7 9 9 2.62 1.29
-7 9 9 1.81 1.07
-7 9 9 0.29 1.55
-7 9 8 9.48 1.4
-7 9 8 8.64 1.23
-7 9 8 10.09 1.73
-7 9 7 3.94 1.2
-7 9 7 5.15 0.98
-7 9 7 5.75 1.44
-7 9 6 36.63 2.08
-7 9 6 39.76 1.83
-7 9 6 42.12 1.62
-7 9 6 36.73 1.88
7 -9 -5 44.59 2.02
7 -9 -5 47.08 2.04
7 -9 -5 47.5 2.13
-7 9 5 52.13 1.85
-7 9 5 53.06 2.37
-7 9 5 49.72 2.08
7 -9 -4 13.71 1.48
7 -9 -4 11.81 1.43
7 -9 -4 11.72 1.47
-7 9 4 12.48 1.09
-7 9 4 11.18 1.55
-7 9 4 12.01 1.41
-7 9 4 13.32 1.26
7 -9 -3 28.27 1.77
7 -9 -3 28.18 1.71
-7 9 3 30.54 1.49
-7 9 3 29.62 2.07
-7 9 3 30.62 1.99
-7 9 3 32.03 1.71
7 -9 -2 24.69 1.68
7 -9 -2 27.82 1.73
7 -9 -2 25.42 1.31
7 -9 -2 27.5 1.31
-7 9 2 25.97 1.9
-7 9 2 26.49 1.58
-7 9 2 27.2 1.93
-7 9 2 23.55 1.37
7 -9 -1 265.94 6.31
7 -9 -1 251.66 6.9
7 -9 -1 263.24 6.17
7 -9 -1 257.43 6.47
7 -9 -1 266.85 6.11
-7 9 1 257.01 6.28
-7 9 1 261.65 6.63
-7 9 1 220.34 6.35
-7 9 1 264.03 5.91
7 -9 0 103.58 3.18
7 -9 0 111.7 3.47
7 -9 0 101.36 2.46
7 -9 0 103.02 3.27
7 -9 0 98.26 3.59
-7 9 0 107.93 3.18
-7 9 0 105.5 3.7
-7 9 0 106.38 3.68
7 -9 1 31.17 1.82
7 -9 1 29.15 1.97
7 -9 1 30.51 1.81
7 -9 1 30.93 1.3
7 -9 1 27.89 1.78
7 -9 1 27.28 1.97
7 -9 1 32.5 1.87
-7 9 -1 33.97 1.7
-7 9 -1 32.49 2.21
-7 9 -1 33.05 2.25
7 -9 2 3.4 0.97
7 -9 2 3.34 0.68
7 -9 2 4.73 1.19
7 -9 2 2.49 0.93
7 -9 2 2.98 0.99
7 -9 2 2 0.83
7 -9 2 2.22 0.83
-7 9 -2 4.69 1.26
-7 9 -2 2.54 1.14
-7 9 -2 3.69 0.88
7 -9 3 44.81 2.39
7 -9 3 47.06 2.47
7 -9 3 42.88 2.36
7 -9 3 47.14 2
7 -9 3 48.02 2.68
-7 9 -3 49.79 2.82
-7 9 -3 49.46 2.22
-7 9 -3 47.64 2.77
-7 9 -3 50.63 2.84
7 -9 4 64.14 3.08
7 -9 4 62.26 3.21
7 -9 4 63.05 2.96
7 -9 4 65.69 3.37
7 -9 4 65.14 2.53
-7 9 -4 61.84 2.55
-7 9 -4 58.72 2.76
-7 9 -4 58.59 3.16
-7 9 -4 59.03 3.1
-7 9 -4 64.4 3.39
7 -9 5 33.35 2.52
7 -9 5 27.27 2.42
7 -9 5 23.28 2.48
7 -9 5 30.81 2.01
7 -9 5 25.27 2.75
-7 9 -5 26.07 2.89
-7 9 -5 25.51 2.12
-7 9 -5 28.23 1.88
-7 9 -5 25.74 2.66
7 -9 6 4.89 1.54
7 -9 6 6.08 1.38
7 -9 6 4.12 1.44
7 -9 6 5.01 1.85
7 -9 6 5.92 1.6
7 -9 6 2.88 1.68
7 -9 6 6.21 1.57
-7 9 -6 4.88 1.93
-7 9 -6 3.2 1.08
-7 9 -6 6.97 1.74
-7 9 -6 4.04 1.43
7 -9 7 11.01 1.97
7 -9 7 9.83 1.84
7 -9 7 5.76 2
7 -9 7 7.8 2.11
7 -9 7 8.31 1.8
7 -9 7 10.55 1.98
7 -9 7 10.25 2.1
-7 9 -7 10.34 1.8
-7 9 -7 9.85 2.08
-7 9 -7 9.87 1.52
-7 9 -7 12.06 2.57
7 -9 8 3.71 1.98
7 -9 8 3.78 2.19
7 -9 8 4.22 2.58
7 -9 8 6.86 2.06
7 -9 8 3.44 1.85
-7 9 -8 2.79 1.54
-7 9 -8 2.68 1.79
7 -9 9 10.57 2.59
7 -9 9 9.22 2.71
7 -9 9 9.01 2.53
7 -9 9 10.38 2.37
7 -9 9 11.43 2.55
-8 10 10 0.43 2.08
-8 10 10 5.87 2.28
-8 10 9 6.43 1.62
-8 10 9 4.32 1.87
-8 10 9 4.01 1.89
-8 10 9 2.43 1.12
-8 10 8 9.45 1.7
-8 10 8 14 2.12
-8 10 8 13.24 1.41
-8 10 7 0.37 1.31
-8 10 7 1.61 0.75
-8 10 7 1.24 0.94
-8 10 7 2.55 1.4
-8 10 7 0.48 0.92
8 -10 -6 19.14 1.66
8 -10 -6 19.27 1.55
-8 10 6 17.97 1.69
-8 10 6 19.01 1.42
-8 10 6 18.57 2.15
-8 10 6 15.69 1.57
8 -10 -5 13.19 1.67
8 -10 -5 13.36 1.66
-8 10 5 17.22 2.33
-8 10 5 16.12 1.53
-8 10 5 15.78 1.35
-8 10 5 16.1 2.1
8 -10 -4 21.9 1.9
8 -10 -4 22.46 1.69
8 -10 -4 20.94 1.81
-8 10 4 20.91 1.42
-8 10 4 21.37 1.6
-8 10 4 22.27 2.14
-8 10 4 19.72 2.22
8 -10 -3 40.04 2.22
8 -10 -3 42.92 2.35
8 -10 -3 38.97 2.16
-8 10 3 43.33 2.51
-8 10 3 43.31 2.02
-8 10 3 32.89 2.39
-8 10 3 43.58 1.91
8 -10 -2 8.5 1.3
8 -10 -2 6.34 1.16
8 -10 -2 8.5 1.14
8 -10 -2 9.22 1.03
-8 10 2 6.42 1.45
-8 10 2 6.99 1.1
-8 10 2 6.37 0.91
-8 10 2 5.5 1.31
8 -10 -1 68.81 2.51
8 -10 -1 65.31 2.91
8 -10 -1 66.03 2.81
8 -10 -1 70.12 2.54
-8 10 1 69.04 2.75
-8 10 1 66.25 3.1
-8 10 1 71.52 3.09
-8 10 1 67.39 2.45
8 -10 0 8.88 1.24
8 -10 0 7.72 1.35
8 -10 0 6.34 1.27
8 -10 0 7.76 0.77
8 -10 0 6.99 1.16
-8 10 0 6.82 0.98
-8 10 0 7.24 1.56
-8 10 0 7.94 1.45
8 -10 1 49.98 2.45
8 -10 1 49.16 2.72
8 -10 1 55.48 2.74
8 -10 1 52.84 1.76
8 -10 1 53.49 2.47
-8 10 -1 56.11 2.36
-8 10 -1 60.7 3.04
8 -10 2 30.5 2.14
8 -10 2 31.42 1.57
8 -10 2 30.53 2.11
8 -10 2 30.24 2.37
8 -10 2 32.3 2.13
8 -10 2 33.43 2.36
-8 10 -2 29.44 2.54
-8 10 -2 32.4 2.56
-8 10 -2 30.62 1.82
8 -10 3 74.74 3.24
8 -10 3 72.05 2.62
8 -10 3 75.03 3.3
8 -10 3 75.32 3.49
8 -10 3 74.82 3.65
-8 10 -3 69.75 3.48
-8 10 -3 71.47 3.57
-8 10 -3 73.66 2.88
8 -10 4 69.77 3.66
8 -10 4 71.89 3.84
8 -10 4 73.7 3.49
8 -10 4 70.55 2.76
8 -10 4 71.6 3.39
-8 10 -4 66.48 3.14
-8 10 -4 68.92 3.85
-8 10 -4 67.27 2.88
-8 10 -4 71.58 3.66
8 -10 5 18.5 2.5
8 -10 5 22.63 2.5
8 -10 5 25.54 2.68
8 -10 5 19.07 2
8 -10 5 17.91 2.35
-8 10 -5 20 2.34
-8 10 -5 24.78 2.08
-8 10 -5 22.06 3.09
-8 10 -5 19.87 2.57
8 -10 6 5.71 1.92
8 -10 6 7.21 1.87
8 -10 6 8.32 2.02
8 -10 6 4 1.89
8 -10 6 9.55 2.08
8 -10 6 6.68 1.66
8 -10 6 9.76 2.45
-8 10 -6 10.24 1.89
-8 10 -6 9.53 1.58
-8 10 -6 11.96 2.42
-8 10 -6 8.73 2.51
8 -10 7 12.64 2.5
8 -10 7 8.88 2.46
8 -10 7 10.93 2.26
8 -10 7 7.82 2.39
8 -10 7 12.6 1.97
-8 10 -7 11.46 1.82
8 -10 8 22.67 2.82
8 -10 8 16.73 3.06
8 -10 8 23.9 3.27
8 -10 8 19.42 3.16
8 -10 8 17.17 2.84
-8 10 -8 14.26 2.37
8 -10 9 11.17 2.88
8 -10 9 8.41 3.22
8 -10 9 8.23 2.64
8 -10 9 9.78 3.16
-9 11 9 2.54 2.19
-9 11 8 2.44 1.9
-9 11 8 4.42 1.95
-9 11 8 3.57 1.28
-9 11 7 6.3 1.25
-9 11 7 8.21 1.17
-9 11 7 6.77 1.94
-9 11 7 6.15 1.26
-9 11 7 9.42 1.94
9 -11 -6 17.62 1.75
9 -11 -6 22.02 2.23
-9 11 6 18.02 2.06
-9 11 6 20.98 1.6
-9 11 6 19.57 2.16
-9 11 6 21.2 2.49
-9 11 6 21.13 1.83
9 -11 -5 0.43 1.19
9 -11 -5 0.84 1.13
-9 11 5 0.2 0.85
-9 11 5 1.08 1.19
-9 11 5 0.62 1.59
-9 11 5 1.53 0.95
-9 11 5 2.27 1.5
9 -11 -4 17.44 2.01
9 -11 -4 20.73 1.82
-9 11 4 17.54 1.65
-9 11 4 22.19 2.49
-9 11 4 18.26 1.57
-9 11 4 22.72 2.55
9 -11 -3 7.77 1.21
9 -11 -3 7.09 1.37
-9 11 3 8.38 1.22
-9 11 3 6.87 1.62
-9 11 3 6.65 1.64
-9 11 3 7.45 1.25
9 -11 -2 8.92 1.49
9 -11 -2 7.44 1.07
9 -11 -2 10.86 1.29
9 -11 -2 6.59 1.25
-9 11 2 12.5 1.87
-9 11 2 9.95 1.75
-9 11 2 11.44 1.46
-9 11 2 10.08 1.24
9 -11 -1 6.89 1.19
9 -11 -1 8.4 1.53
9 -11 -1 7.52 1.41
9 -11 -1 7.62 1.14
-9 11 1 7.31 1.09
-9 11 1 7.65 1.64
-9 11 1 9.53 1.72
9 -11 0 47.99 2.76
9 -11 0 48.71 2.33
9 -11 0 45.29 2.4
9 -11 0 47.88 2.74
-9 11 0 46.59 2.99
-9 11 0 45.28 2.23
-9 11 0 50.04 3.12
9 -11 1 82.53 3.65
9 -11 1 82.62 2.4
9 -11 1 80.91 3.27
9 -11 1 90.21 3.4
-9 11 -1 84.35 3.84
-9 11 -1 89.12 3.15
-9 11 -1 84.49 3.87
9 -11 2 18.09 2.17
9 -11 2 14.55 2
9 -11 2 16.17 1.43
9 -11 2 16.19 2.2
9 -11 2 17.47 2.1
-9 11 -2 18.01 1.79
-9 11 -2 16.91 2.1
-9 11 -2 21.78 2.5
9 -11 3 15.16 2.17
9 -11 3 11.59 1.84
9 -11 3 11.44 1.51
9 -11 3 11.72 1.75
9 -11 3 13.77 1.88
9 -11 3 14.7 2.11
9 -11 3 16.54 2.25
-9 11 -3 13.17 2.04
-9 11 -3 15.87 1.84
-9 11 -3 16.5 2.35
-9 11 -3 16.36 2.33
9 -11 4 11.11 1.85
9 -11 4 7.3 2.04
9 -11 4 7.23 1.97
9 -11 4 9.93 1.31
9 -11 4 8.28 1.84
9 -11 4 8.83 1.67
9 -11 4 9.17 1.75
-9 11 -4 11.57 2.32
-9 11 -4 8.32 2.13
-9 11 -4 11 1.49
-9 11 -4 9.97 2.24
9 -11 5 38.98 3.14
9 -11 5 37.29 3.3
9 -11 5 39.44 3.4
9 -11 5 33.77 3.52
9 -11 5 38.3 3.72
9 -11 5 28.21 3.15
9 -11 5 34.88 2.51
-9 11 -5 35.31 2.54
-9 11 -5 26.82 3.75
-9 11 -5 39.68 3.74
9 -11 6 40.34 3.72
9 -11 6 34.08 2.98
9 -11 6 37.06 3.51
9 -11 6 33.22 3.68
9 -11 6 38.6 4.07
-9 11 -6 22.73 2.84
9 -11 7 6.38 2.32
9 -11 7 6.19 2.08
9 -11 7 7.36 2.32
9 -11 7 6.92 2.4
9 -11 7 -2.28 2.68
-9 11 -7 3.29 2.06
-9 11 -7 10.66 2.53
9 -11 8 1.99 2.65
9 -11 8 -1.32 2.22
9 -11 8 4.57 3.13
9 -11 8 -1.51 2.75
9 -11 8 2.67 2.87
-10 12 8 0.2 2.15
-10 12 8 5.31 1.16
-10 12 8 2.77 1.27
-10 12 8 1.32 1.37
-10 12 8 2.51 2.91
-10 12 8 2 2.21
-10 12 7 3.55 2.18
-10 12 7 2.45 2.38
-10 12 7 4.26 1.34
-10 12 7 4.87 1.5
-10 12 7 8.28 2.23
-10 12 7 4.9 1.16
10 -12 -6 4.68 1.35
10 -12 -6 1.59 1.61
10 -12 -6 6.01 1.63
-10 12 6 3.94 1.28
-10 12 6 3.48 1.09
-10 12 6 6.09 2.09
-10 12 6 0.55 2.2
-10 12 6 3.66 1.58
10 -12 -5 19.83 2.61
10 -12 -5 20.01 2.32
10 -12 -5 21.6 2.48
-10 12 5 22.22 2.76
-10 12 5 25.56 3.19
-10 12 5 23.62 2
-10 12 5 23.23 3.18
-10 12 5 24.48 2.08
10 -12 -4 16.25 2.08
10 -12 -4 14.54 1.72
10 -12 -4 14.96 1.93
-10 12 4 15.89 2.41
-10 12 4 16.58 1.99
-10 12 4 18.65 2.45
-10 12 4 14.96 1.91
-10 12 4 14.81 1.73
10 -12 -3 2.51 1.18
10 -12 -3 2.73 1.46
10 -12 -3 0.33 1.41
-10 12 3 1.17 1.1
-10 12 3 -0.33 0.89
-10 12 3 0.16 1.62
-10 12 3 -1.18 1.66
10 -12 -2 51.04 2.91
10 -12 -2 56.85 2.37
10 -12 -2 53.34 2.96
10 -12 -2 53.83 3.3
10 -12 -2 51.55 2.22
-10 12 2 53.26 3.38
-10 12 2 57.71 2.6
-10 12 2 56.9 3.6
10 -12 -1 2.1 1
10 -12 -1 1.37 1.36
10 -12 -1 1.63 1.19
-10 12 1 2.54 0.99
-10 12 1 -0.16 1.55
-10 12 1 1.05 1.64
10 -12 0 24.87 2.16
10 -12 0 20.67 2.43
10 -12 0 20.75 2.25
-10 12 0 25.63 2.86
-10 12 0 19.89 2.31
-10 12 0 22.71 2
-10 12 0 21.59 2.83
10 -12 1 12.17 1.21
10 -12 1 13.39 1.86
10 -12 1 14.15 2.12
10 -12 1 16.97 2.26
10 -12 1 12.71 2.01
-10 12 -1 12.89 2.34
-10 12 -1 14.99 1.87
-10 12 -1 12.74 2.18
10 -12 2 24.09 3.26
10 -12 2 21.34 2.58
10 -12 2 24.07 3.02
10 -12 2 18.98 2.35
10 -12 2 22.34 2.73
10 -12 2 21.72 1.6
-10 12 -2 19.07 2.52
-10 12 -2 23.5 3.23
-10 12 -2 24.61 2.84
-10 12 -2 23.26 2.11
10 -12 3 28.88 3.16
10 -12 3 21.6 2.87
10 -12 3 27.25 3.64
10 -12 3 29.77 2.03
10 -12 3 32.16 2.8
10 -12 3 28.72 2.94
10 -12 3 29.1 3.18
-10 12 -3 23.54 2.75
-10 12 -3 28.72 3.43
-10 12 -3 28.31 3.55
-10 12 -3 31.19 2.4
10 -12 4 4.02 1.76
10 -12 4 5.43 1.35
10 -12 4 4.19 2.3
10 -12 4 5.03 1.96
10 -12 4 5.52 1.83
10 -12 4 6.56 1.75
-10 12 -4 0.61 2.3
-10 12 -4 3.83 2.3
-10 12 -4 7.78 2.14
-10 12 -4 4.46 2.44
-10 12 -4 5.43 1.41
10 -12 5 4.8 2.36
10 -12 5 1.86 1.97
10 -12 5 4.85 1.54
10 -12 5 2.46 1.81
10 -12 5 2.98 2.65
-10 12 -5 4.83 2.75
-10 12 -5 -1.03 2.1
-10 12 -5 3.14 1.57
10 -12 6 5.65 1.9
10 -12 6 2.89 2.22
10 -12 6 4.6 2.96
10 -12 6 3.78 2.28
10 -12 6 0.96 2.29
-10 12 -6 8.04 2.13
-10 12 -6 0.86 2.43
10 -12 7 13.1 3.35
10 -12 7 10.11 3.23
10 -12 7 16.06 2.7
10 -12 7 8.52 2.77
-11 13 7 9.1 2.83
-11 13 7 8.41 1.79
-11 13 7 13.04 2.47
-11 13 7 2.7 3.01
-11 13 7 6.21 1.53
11 -13 -6 7.65 2.09
-11 13 6 5.12 2.57
-11 13 6 6.79 1.64
-11 13 6 6.74 2.72
-11 13 6 7.49 1.85
-11 13 6 10.36 1.57
11 -13 -5 12.98 2.32
11 -13 -5 18.68 2.67
-11 13 5 17.44 2.12
-11 13 5 16.44 2.74
-11 13 5 19.09 2.81
-11 13 5 20.26 2.49
-11 13 5 15.93 2.86
11 -13 -4 13.35 2.15
11 -13 -4 18.19 2.52
-11 13 4 12.94 2.54
-11 13 4 14.49 1.67
-11 13 4 13.42 2.13
-11 13 4 14.91 2.79
11 -13 -3 0.99 1.79
11 -13 -3 0.93 1.66
-11 13 3 3.17 2.26
-11 13 3 5.25 2.16
-11 13 3 2.43 1.13
-11 13 3 1.69 1.75
11 -13 -2 28.09 3.08
11 -13 -2 26.78 2.21
11 -13 -2 23.19 2.61
11 -13 -2 19.51 2.51
11 -13 -2 28.44 1.96
-11 13 2 27.13 3.42
-11 13 2 23.02 2.86
-11 13 2 25.31 2.61
-11 13 2 25.19 2.27
11 -13 -1 22.16 2.83
11 -13 -1 15.68 1.87
11 -13 -1 14.37 2.4
11 -13 -1 17.64 2.27
11 -13 -1 17.89 2.03
-11 13 1 19.37 2.17
-11 13 1 15.24 2.62
-11 13 1 18.91 2.8
-11 13 1 19.45 2.79
11 -13 0 32.77 3.75
11 -13 0 34.2 2.64
11 -13 0 31.83 3.34
11 -13 0 30.37 3.05
-11 13 0 32.82 3.65
-11 13 0 36.31 2.49
-11 13 0 32.46 3.81
-11 13 0 30.19 3.51
11 -13 1 4.7 1.84
11 -13 1 4.37 0.9
11 -13 1 4.22 1.96
11 -13 1 3.89 2.19
11 -13 1 4.59 1.86
11 -13 1 4.11 1.56
-11 13 -1 5.69 2.33
-11 13 -1 4.05 2.24
-11 13 -1 1.16 1.37
-11 13 -1 1.87 2.31
11 -13 2 8.01 1.27
11 -13 2 5.79 2.34
11 -13 2 11.8 2.28
11 -13 2 14.1 2.04
11 -13 2 6.3 2.26
11 -13 2 10.01 1.96
-11 13 -2 10.17 2.52
-11 13 -2 7.49 2.76
-11 13 -2 9.65 1.77
11 -13 3 -0.52 1.82
11 -13 3 2.29 1.22
11 -13 3 -0.22 2.06
-11 13 -3 0.51 2.14
-11 13 -3 1.88 1.5
-11 13 -3 -2.24 2.44
11 -13 4 11.84 2.25
11 -13 4 13.21 2.45
11 -13 4 10.94 2.41
11 -13 4 13.98 1.82
-11 13 -4 11.8 2.85
-11 13 -4 12.17 3.02
-11 13 -4 14.04 2.11
11 -13 5 13.37 2.63
11 -13 5 10.63 2.51
11 -13 5 12.27 3.2
11 -13 5 12.57 2.04
-11 13 -5 6.97 2.27
-11 13 -5 10.93 2.97
11 -13 6 0.06 2.76
11 -13 6 6.01 2.66
11 -13 6 -2.37 2.48
11 -13 6 1.89 2.23
-11 13 -6 2.15 2.4
-12 14 6 1.14 1.57
-12 14 6 -0.83 3.26
12 -14 -5 3.55 2.32
-12 14 5 10.05 3.06
12 -14 -4 19.37 2.72
12 -14 -4 17.8 2.65
-12 14 4 20 3.21
-12 14 4 18.77 1.97
12 -14 -3 37.49 3.64
12 -14 -3 42.42 3.96
-12 14 3 44.22 2.86
-12 14 3 39.01 4.24
-12 14 3 43.41 3.73
12 -14 -2 21.39 2.85
12 -14 -2 18.88 2.16
12 -14 -2 16.57 2.63
12 -14 -2 18.5 2.56
-12 14 2 18.06 2.94
-12 14 2 18.35 2.59
-12 14 2 19.82 2.19
12 -14 -1 5.37 2.36
12 -14 -1 2.21 2.13
12 -14 -1 0.77 1.77
12 -14 -1 -0.83 1.38
-12 14 1 0.21 1.39
-12 14 1 -0.4 2.43
-12 14 1 0.55 2.26
12 -14 0 4.55 1.64
12 -14 0 2.06 1.98
12 -14 0 6.98 2.38
12 -14 0 2.04 2.06
-12 14 0 1.03 2.59
-12 14 0 4.24 1.66
-12 14 0 0.83 2.39
12 -14 1 13.65 2.2
12 -14 1 15.97 2.78
12 -14 1 26.24 3.62
-12 14 -1 14.23 2.8
-12 14 -1 14.98 3.15
-12 14 -1 19 2.21
12 -14 2 38.95 3.74
12 -14 2 38.02 2.42
12 -14 2 34.64 4.11
-12 14 -2 36.75 3.21
-12 14 -2 36.74 4.8
12 -14 3 10.64 2.31
12 -14 3 7.88 1.74
12 -14 3 7.67 2.7
-12 14 -3 9.4 2.15
-12 14 -3 8.04 3.28
12 -14 4 2.79 1.93
12 -14 4 3.56 2.38
12 -14 4 5.1 2.91
-12 14 -4 6.76 3.31
-12 14 -4 3.99 2.17
12 -14 5 1.48 2.36
12 -14 5 -2 2.88
12 -14 5 5.49 3.21
12 -14 5 4.77 3.03
-12 14 -5 4.29 2.74
13 -15 -4 0.23 2.75
-13 15 4 3.03 1.81
-13 15 3 7.23 2.02
13 -15 -2 6.78 2.52
13 -15 -2 5.79 1.77
-13 15 2 5.95 1.94
13 -15 -1 18.92 3.14
13 -15 -1 25.81 3.03
-13 15 1 17.2 2.15
13 -15 0 10.5 2.78
13 -15 0 8.79 2.73
13 -15 0 16.24 2.24
-13 15 0 11.23 2.19
13 -15 1 10.75 3.04
13 -15 1 17.16 2.65
-13 15 -1 14.58 3.37
-13 15 -1 15.04 2.39
13 -15 2 2.43 2.47
13 -15 2 2.72 2.92
-13 15 -2 6.45 2.23
-13 15 -2 3.3 3.43
13 -15 3 8.52 3.47
13 -15 3 6.67 2.79
-13 15 -3 8.01 3.76
-13 15 -3 4 2.52
19 -15 -1 25.43 2.98
-18 14 -3 7.31 2.64
18 -14 3 0.49 2.24
18 -14 3 1.02 3.32
18 -14 3 0.29 2.75
-18 14 -2 8.3 2.33
-18 14 -2 3.7 3.72
18 -14 2 8.29 3.25
18 -14 2 5.94 2.61
-18 14 -1 13.94 2.29
18 -14 1 11.56 2.46
18 -14 1 12.28 3.01
-18 14 0 4.23 1.97
18 -14 0 0.53 2.02
18 -14 0 3.18 2.78
18 -14 0 2.39 2.43
-18 14 1 -0.22 1.75
18 -14 -1 3.38 1.9
18 -14 -1 2.47 2.42
18 -14 -1 2.48 2.57
-18 14 2 1.1 1.74
18 -14 -2 3.43 1.79
18 -14 -2 -0.94 2.66
18 -14 -2 1.02 2.41
-18 14 3 19.43 2.35
18 -14 -3 18.53 2.48
18 -14 -3 20.3 2.92
18 -14 -3 22.31 3.06
-18 14 4 5.31 1.91
-18 14 5 2.22 1.99
-18 14 5 -0.95 2.43
-17 13 -4 -1.28 2.97
-17 13 -4 4.37 2.37
17 -13 4 5.38 2.1
17 -13 4 3.26 2.95
17 -13 4 -3.13 2.49
-17 13 -3 3.42 3.57
-17 13 -3 3.9 2.07
17 -13 3 2.82 1.65
17 -13 3 2.52 2.19
17 -13 3 4.64 2.35
-17 13 -2 10.02 2.15
17 -13 2 5.92 1.41
17 -13 2 6.75 2.06
17 -13 2 2.04 2.45
17 -13 2 4.68 2.24
-17 13 -1 2.59 1.58
17 -13 1 2.42 2.03
17 -13 1 -1.88 2.1
17 -13 1 1.09 1.7
17 -13 1 -0.92 2.21
17 -13 1 2.82 1.21
-17 13 0 19.49 2.16
17 -13 0 15.07 2.37
17 -13 0 16.26 2.52
17 -13 0 18.88 2.4
17 -13 0 21.94 2.84
-17 13 1 12.21 3.17
-17 13 1 19.03 2.44
17 -13 -1 15.16 1.91
17 -13 -1 11.73 2.45
17 -13 -1 15.21 2.36
-17 13 2 8.66 2.92
-17 13 2 8.73 1.57
17 -13 -2 6.17 1.92
17 -13 -2 8.37 2.3
17 -13 -2 11.15 1.92
17 -13 -2 6.41 1.49
-17 13 3 9.62 1.92
-17 13 3 14.02 2.97
17 -13 -3 8.43 1.58
17 -13 -3 10.72 2.38
17 -13 -3 10.51 2.33
17 -13 -3 12.42 1.44
-17 13 4 -3.98 2.6
-17 13 4 2.02 1.35
17 -13 -4 3.44 2.04
-17 13 5 20.78 2.68
-17 13 5 22.98 2.74
17 -13 -5 21.59 2.5
-17 13 6 4.07 2.32
-17 13 6 6.39 1.64
16 -12 6 8.28 2.86
16 -12 6 3.66 2.95
16 -12 6 6.49 2.41
16 -12 6 7.97 3.01
-16 12 -5 2.12 2.01
-16 12 -5 3.95 2.66
16 -12 5 3.35 2.5
16 -12 5 0.43 2.29
16 -12 5 3.39 2.01
16 -12 5 6.6 2.19
-16 12 -4 8.04 1.97
-16 12 -4 5.25 2.94
-16 12 -4 6.47 2.48
16 -12 4 7.67 2.66
16 -12 4 4.18 1.67
16 -12 4 7.82 2.26
-16 12 -3 28.39 2.83
16 -12 3 28.02 3.64
16 -12 3 27.78 3.58
16 -12 3 26.08 3.23
16 -12 3 33.06 2.38
-16 12 -2 36.08 4.11
-16 12 -2 47.55 2.91
16 -12 2 50.04 3.44
16 -12 2 45.5 3.77
16 -12 2 48.67 3.71
16 -12 2 50.88 2.33
16 -12 2 50.82 3.6
16 -12 2 50.1 4.03
-16 12 -1 3.14 1.32
-16 12 -1 5.04 2.36
-16 12 -1 3.69 2.29
16 -12 1 4.97 1.77
16 -12 1 5.4 1.98
16 -12 1 5.68 2.02
16 -12 1 1.85 1.83
16 -12 1 6.18 1.61
16 -12 1 3.51 0.98
-16 12 0 5.48 2.15
-16 12 0 8.36 2.35
-16 12 0 3.78 1.25
16 -12 0 4.64 1.56
16 -12 0 6.11 0.87
16 -12 0 4.77 1.76
16 -12 0 6.18 1.77
16 -12 0 4.26 1.9
16 -12 0 6.92 1.86
-16 12 1 0.66 1.19
-16 12 1 1.55 2.06
-16 12 1 2.5 2.07
16 -12 -1 -0.14 1.65
16 -12 -1 0.99 1.45
16 -12 -1 3.54 1.61
16 -12 -1 1.29 1.58
16 -12 -1 2.98 1.28
-16 12 2 21.31 2.9
-16 12 2 16.44 2.61
-16 12 2 17.52 2.14
16 -12 -2 21.54 2.71
16 -12 -2 21.2 2.31
16 -12 -2 18.1 1.88
16 -12 -2 20.18 2.56
-16 12 3 10.9 1.52
-16 12 3 12.25 2.55
-16 12 3 12.77 2.62
16 -12 -3 10.86 1.84
16 -12 -3 8.8 1.2
16 -12 -3 11.42 1.46
16 -12 -3 11.24 1.89
16 -12 -3 8.34 1.81
-16 12 4 7.81 2.44
-16 12 4 6.58 2.52
-16 12 4 6.91 1.37
16 -12 -4 6.28 1.66
16 -12 -4 5.42 1.76
-16 12 5 8.73 1.48
-16 12 5 8.5 2.45
-16 12 5 9.79 2.03
-16 12 5 10.82 2.83
16 -12 -5 7.83 1.79
16 -12 -5 9.9 1.83
-16 12 6 2.02 2.38
-16 12 6 -1.34 1.85
-16 12 6 2 1.34
-16 12 6 1.78 2.73
16 -12 -6 0.81 1.64
-16 12 7 8.16 1.52
-16 12 7 8.81 2.92
-16 12 7 5.44 2.4
-16 12 8 6.27 1.55
-16 12 8 1.43 2.44
-16 12 8 4.64 2.91
15 -11 7 3.07 2.62
15 -11 7 1.99 3.12
15 -11 7 1 2.34
15 -11 7 0.41 2.73
15 -11 7 5.81 3.19
-15 11 -6 5.96 2.08
15 -11 6 5.74 1.93
15 -11 6 10.69 2.73
15 -11 6 5.72 2.63
15 -11 6 4.52 2.54
15 -11 6 4.32 3.41
-15 11 -5 35.63 4.49
-15 11 -5 34.34 4.3
-15 11 -5 34.55 3
15 -11 5 32.1 3.53
15 -11 5 34.44 3.5
15 -11 5 35.95 3.83
15 -11 5 34.68 2.8
-15 11 -4 16.91 3.04
-15 11 -4 14.63 1.77
-15 11 -4 16 2.76
15 -11 4 18.56 2.22
15 -11 4 22.93 3.22
15 -11 4 13.81 2.27
15 -11 4 20.85 2.7
15 -11 4 15.51 2.46
-15 11 -3 2.89 2.02
-15 11 -3 2.13 1.2
-15 11 -3 2.99 2.2
15 -11 3 4.36 1.55
15 -11 3 8.36 1.93
15 -11 3 5.47 1.81
15 -11 3 2.17 1.88
15 -11 3 6.44 1.85
15 -11 3 5.28 1.21
-15 11 -2 9.16 2.08
-15 11 -2 8.39 2.28
-15 11 -2 6.44 1.26
15 -11 2 5.56 1.8
15 -11 2 7.44 1.71
15 -11 2 6.23 1.7
15 -11 2 7.6 1.17
15 -11 2 4.74 1.86
15 -11 2 4.28 1.56
-15 11 -1 77.16 3.18
-15 11 -1 82.6 4.3
15 -11 1 79.89 3.53
15 -11 1 74.99 3.57
15 -11 1 75.27 2.48
15 -11 1 75.27 3.7
-15 11 0 62.83 3.86
-15 11 0 64.94 2.84
15 -11 0 65.07 3.38
15 -11 0 64.48 2
15 -11 0 61.03 3.25
15 -11 0 68.94 3.06
-15 11 1 11.66 2.19
-15 11 1 13.75 1.7
-15 11 1 10.83 2.04
15 -11 -1 12.89 1.61
15 -11 -1 12.21 1.69
15 -11 -1 11.29 1.74
15 -11 -1 13.19 1.83
15 -11 -1 11.62 1.74
-15 11 2 10.61 2.35
-15 11 2 15.95 1.77
-15 11 2 16.75 2.41
-15 11 2 15.41 2.27
15 -11 -2 15.81 2.2
15 -11 -2 14.44 1.58
15 -11 -2 10.82 1.42
15 -11 -2 16.98 1.9
15 -11 -2 16.95 1.94
-15 11 3 2.69 1.9
-15 11 3 3.09 1.06
-15 11 3 2.33 1.68
-15 11 3 1.75 1.93
15 -11 -3 5.03 1.51
15 -11 -3 4.89 0.91
15 -11 -3 4.3 1.03
15 -11 -3 0.02 1.24
15 -11 -3 2.2 1.37
-15 11 4 26.92 3.15
-15 11 4 23.57 1.95
-15 11 4 24.74 3.13
-15 11 4 25.89 3.15
15 -11 -4 22.65 2.22
15 -11 -4 21.05 2.14
15 -11 -4 23.87 2.27
-15 11 5 9.37 2.28
-15 11 5 10.33 2.12
-15 11 5 9.71 1.37
-15 11 5 12.72 1.77
15 -11 -5 7.97 1.46
15 -11 -5 10.02 1.74
-15 11 6 11.15 1.96
-15 11 6 11.71 2.23
-15 11 6 10.87 1.45
-15 11 6 11.57 2.74
15 -11 -6 11.89 1.93
15 -11 -6 12.74 1.63
-15 11 7 15.24 2.21
-15 11 7 10.28 2.38
-15 11 7 11.99 1.46
15 -11 -7 10.16 1.82
15 -11 -7 9.98 1.72
-15 11 8 -0.17 2.33
-15 11 8 0.09 1.21
-15 11 8 -1.02 2.2
-15 11 9 12.75 2.71
-15 11 9 5.2 1.28
14 -10 8 8.37 2.63
14 -10 8 6.28 2.76
14 -10 8 3.94 2.93
14 -10 8 7.42 2.88
-14 10 -7 14.2 2.36
14 -10 7 10.86 2.76
14 -10 7 8.7 2.59
14 -10 7 13.63 2.67
14 -10 7 12.58 3.21
14 -10 7 8.19 2.08
-14 10 -6 11.13 2.1
-14 10 -6 8.82 1.91
14 -10 6 9.03 1.82
14 -10 6 6.14 2.05
14 -10 6 10.98 2.41
14 -10 6 7 2.25
-14 10 -5 12.69 2.68
-14 10 -5 19.46 2.75
-14 10 -5 18.07 2.82
-14 10 -5 22.08 2.71
-14 10 -5 20.13 2.29
14 -10 5 21.59 3.12
14 -10 5 19.3 2.56
14 -10 5 12 2.46
14 -10 5 18.91 2.02
14 -10 5 13.71 2.1
14 -10 5 14.31 2.21
14 -10 5 14.98 2.19
-14 10 -4 7.44 2.3
-14 10 -4 9.69 1.42
-14 10 -4 8.34 1.77
-14 10 -4 5.07 2.02
14 -10 4 7.59 1.76
14 -10 4 8.24 1.71
14 -10 4 5.22 1.62
14 -10 4 9.28 1.4
14 -10 4 7.57 1.85
14 -10 4 7.68 1.68
14 -10 4 9.97 2
-14 10 -3 58.58 2.64
-14 10 -3 54.36 3.7
-14 10 -3 51.51 3.57
14 -10 3 58.09 3.39
14 -10 3 63.51 2.49
14 -10 3 60.31 3.41
14 -10 3 56.23 3.14
14 -10 3 58.58 3.19
14 -10 3 59.41 3.17
14 -10 3 54.13 3.34
-14 10 -2 60.8 3.67
-14 10 -2 61 2.64
14 -10 2 60.57 3.12
14 -10 2 60.25 3.1
14 -10 2 62.72 3.32
14 -10 2 64.81 2.39
-14 10 -1 60.89 2.58
-14 10 -1 61.23 3.54
14 -10 1 61.05 2.92
14 -10 1 62.61 3.02
14 -10 1 61.53 3.21
14 -10 1 62.72 2.15
14 -10 1 66.61 3.07
14 -10 1 61.64 3.19
-14 10 0 22.43 2.59
-14 10 0 24.51 2.91
-14 10 0 25.92 1.74
14 -10 0 19.89 1.95
14 -10 0 19.26 1.8
14 -10 0 21.85 2.25
14 -10 0 18.68 2
14 -10 0 22.2 2.11
14 -10 0 21.23 1.13
-14 10 1 13.03 1.95
-14 10 1 18.68 1.6
-14 10 1 16.55 2.02
-14 10 1 21.56 2.47
14 -10 -1 16.18 2.06
14 -10 -1 19.94 2.03
14 -10 -1 22.04 1.82
14 -10 -1 21.02 2.04
14 -10 -1 20.09 1.67
-14 10 2 32.24 2.73
-14 10 2 29.83 2.77
-14 10 2 32.22 1.88
-14 10 2 27.08 2.61
14 -10 -2 33.17 1.82
14 -10 -2 32.27 2.25
14 -10 -2 31.79 2.18
14 -10 -2 31.93 1.94
14 -10 -2 32.39 2.28
-14 10 3 13.05 1.48
-14 10 3 17.38 2.37
-14 10 3 18.12 2.47
-14 10 3 18.48 2.48
14 -10 -3 16.28 1.41
14 -10 -3 16.86 1.26
14 -10 -3 15.42 1.83
14 -10 -3 13.44 1.76
-14 10 4 25.64 2.72
-14 10 4 25.64 1.75
-14 10 4 24.95 2.65
-14 10 4 29.72 2.62
14 -10 -4 24.83 1.96
14 -10 -4 28.24 2.04
-14 10 5 4.08 1.25
-14 10 5 2.52 1.5
-14 10 5 2 0.94
-14 10 5 4.16 1.59
-14 10 5 2.38 1.72
14 -10 -5 2.27 1.13
14 -10 -5 2.75 1.09
14 -10 -5 2.99 1.06
-14 10 6 15.86 1.63
-14 10 6 12.49 1.84
-14 10 6 15.1 2.01
-14 10 6 17.91 2.38
14 -10 -6 8.93 1.41
14 -10 -6 12.16 1.37
-14 10 7 5.87 1.64
-14 10 7 6.12 1.07
-14 10 7 1.59 1.69
14 -10 -7 1.61 1.33
14 -10 -7 2.15 1.17
-14 10 8 14.13 2.15
-14 10 8 13.62 1.67
-14 10 8 14.08 2.18
-14 10 9 4.16 2.02
-14 10 9 2.53 2.22
13 -9 8 12.96 2.8
13 -9 8 3.37 2.76
13 -9 8 0.51 2.11
13 -9 8 4.21 2.06
13 -9 8 2.44 2.27
-13 9 -7 6.38 1.72
-13 9 -7 3.08 1.71
13 -9 7 6.79 2.27
13 -9 7 5.14 1.77
13 -9 7 7.64 2.65
13 -9 7 7.75 1.97
13 -9 7 2.88 2.1
-13 9 -6 8.45 2.6
-13 9 -6 12.28 1.75
-13 9 -6 11.38 1.78
-13 9 -6 6.84 2.21
13 -9 6 8.85 1.92
13 -9 6 14.81 2.21
13 -9 6 11.83 2.38
13 -9 6 17.53 2.41
13 -9 6 13.99 1.86
13 -9 6 9.66 2.07
13 -9 6 11.45 2.1
-13 9 -5 10.39 1.97
-13 9 -5 12.54 1.57
-13 9 -5 16.8 1.84
13 -9 5 15.85 2.25
13 -9 5 11.35 1.8
13 -9 5 12.66 1.73
13 -9 5 9.36 1.96
13 -9 5 11.33 1.94
-13 9 -4 43.5 2.55
-13 9 -4 44.03 2.35
13 -9 4 45.36 3.07
13 -9 4 40.15 3.08
13 -9 4 53.09 2.94
13 -9 4 52.26 2.48
13 -9 4 49.46 3.01
13 -9 4 50.99 2.89
-13 9 -3 69.98 2.81
13 -9 3 67.7 2.49
13 -9 3 63.21 2.96
13 -9 3 61.01 3.1
13 -9 3 61.25 3.08
13 -9 3 60.37 3.27
-13 9 -2 17.98 1.55
-13 9 -2 17.17 2.08
-13 9 -2 20.04 2.52
13 -9 2 24.64 2.1
13 -9 2 20.84 2.05
13 -9 2 22.36 1.43
13 -9 2 13.81 1.92
13 -9 2 20.77 2.19
13 -9 2 18.75 1.89
13 -9 2 16.66 1.92
-13 9 -1 1.4 1.17
-13 9 -1 6.56 1.72
-13 9 -1 5.15 0.98
13 -9 1 5.13 0.77
13 -9 1 6.01 1.27
13 -9 1 2.57 0.97
13 -9 1 4.06 1.1
13 -9 1 5.66 1.21
13 -9 1 4.72 1.03
-13 9 0 72.46 2.61
-13 9 0 68.16 3.48
-13 9 0 67.89 3.23
-13 9 0 69.12 3.18
13 -9 0 64.13 2.71
13 -9 0 66.75 2.72
13 -9 0 66.17 3.02
13 -9 0 73.56 2.9
13 -9 0 69.3 2.69
13 -9 0 66.64 1.96
-13 9 1 157.54 5.31
-13 9 1 160.49 5.15
-13 9 1 167.71 5.08
-13 9 1 162.16 4.34
13 -9 -1 154.24 4.35
13 -9 -1 159.46 4.98
13 -9 -1 157.69 4.44
13 -9 -1 161.08 4.55
13 -9 -1 158.16 4.35
13 -9 -1 151.14 3.42
-13 9 2 19.27 2.26
-13 9 2 18.12 2.07
-13 9 2 15.91 1.34
-13 9 2 18.16 2.14
13 -9 -2 18.94 1.4
13 -9 -2 16.4 1.66
13 -9 -2 15 1.65
13 -9 -2 15.05 1.61
13 -9 -2 14.96 1.4
-13 9 3 15.31 1.9
-13 9 3 17.25 1.36
-13 9 3 12.97 1.67
-13 9 3 14.49 1.96
13 -9 -3 15.73 1.13
13 -9 -3 16.38 1.23
13 -9 -3 16.39 1.57
13 -9 -3 17.63 1.57
-13 9 4 14.15 1.88
-13 9 4 12.61 1.26
-13 9 4 10.75 1.57
-13 9 4 11.91 1.65
13 -9 -4 13.58 1.45
13 -9 -4 14.55 1.62
-13 9 5 53.13 2.79
-13 9 5 60.59 2.79
-13 9 5 54.38 2.81
-13 9 5 57.83 2.25
13 -9 -5 58.19 2.2
13 -9 -5 56.03 2.49
-13 9 6 31.91 2.42
-13 9 6 33.33 2.37
-13 9 6 22.58 2.18
-13 9 6 30.88 1.7
-13 9 7 0.07 1.27
-13 9 7 -1.16 1.31
-13 9 7 0.36 0.79
13 -9 -7 1.18 0.97
-13 9 8 12.27 1.89
-13 9 8 12.73 1.89
-13 9 8 10.79 1.16
-13 9 9 1.93 1.65
-13 9 9 2.96 1.83
-13 9 10 3.12 1.99
12 -8 9 18.29 2.63
12 -8 9 8.96 2.51
12 -8 9 11.91 2.77
12 -8 9 12.16 3.03
-12 8 -8 3.5 1.59
-12 8 -8 3.06 1.6
12 -8 8 2.47 1.6
12 -8 8 3.74 2.15
12 -8 8 2.27 2.28
12 -8 8 5.45 2.41
12 -8 8 3.69 1.82
-12 8 -7 11.59 1.69
-12 8 -7 14.48 1.75
-12 8 -7 7.97 2.15
12 -8 7 8.6 1.87
12 -8 7 12.71 2.03
12 -8 7 17.22 2.53
12 -8 7 6.71 2.31
12 -8 7 13.06 2.13
12 -8 7 14.95 2.15
12 -8 7 12.13 2.27
-12 8 -6 15.57 2.19
-12 8 -6 16.57 1.83
-12 8 -6 14.75 1.68
-12 8 -6 16.96 2.55
12 -8 6 18.33 2.47
12 -8 6 13.32 1.66
12 -8 6 14.85 2.05
12 -8 6 13.5 2.19
12 -8 6 14.45 1.82
12 -8 6 16.77 2.22
12 -8 6 15.34 2.16
-12 8 -5 2.04 1.49
-12 8 -5 1.96 0.99
-12 8 -5 2.34 1.13
12 -8 5 0.98 1.25
12 -8 5 2.51 1.2
12 -8 5 2.43 1.44
12 -8 5 0.83 0.93
12 -8 5 1.15 1.18
12 -8 5 2.33 1.42
-12 8 -4 11.11 1.41
-12 8 -4 12.5 1.66
-12 8 -4 15.91 2.19
12 -8 4 9.21 1.63
12 -8 4 7.22 1.34
12 -8 4 7.17 1.28
12 -8 4 11.3 1.4
12 -8 4 7.62 1.34
-12 8 -3 25.85 2.34
-12 8 -3 28.32 1.72
-12 8 -3 26.99 2.56
12 -8 3 27.09 2.03
12 -8 3 28.19 2.26
12 -8 3 27.25 2.09
12 -8 3 27.44 2.2
12 -8 3 28.47 2.05
12 -8 3 27.44 1.63
-12 8 -2 103.27 4.12
-12 8 -2 107.07 3.28
-12 8 -2 98.81 3.89
-12 8 -2 103.36 3.82
12 -8 2 113.66 3.62
12 -8 2 110.55 3.16
12 -8 2 118.66 3.88
12 -8 2 112.67 3.64
12 -8 2 110.08 4.03
12 -8 2 112.11 3.77
12 -8 2 114.62 3.94
-12 8 -1 56.85 2.78
-12 8 -1 62.24 2.29
-12 8 -1 56.76 3.02
-12 8 -1 58.22 2.87
12 -8 1 60.78 2.47
12 -8 1 63.69 2.65
12 -8 1 61.41 1.98
12 -8 1 56.65 2.48
12 -8 1 63.02 2.51
12 -8 1 58.69 2.74
-12 8 0 13.22 1.59
-12 8 0 9.82 1.48
-12 8 0 10.74 1.1
-12 8 0 7.67 1.19
12 -8 0 12.63 1.58
12 -8 0 9.32 1.25
12 -8 0 10.35 1.25
12 -8 0 9.4 0.82
12 -8 0 9.69 1.13
12 -8 0 10.35 1.29
-12 8 1 2.24 0.62
-12 8 1 2.14 1.02
-12 8 1 3.7 1.21
-12 8 1 2.73 1.04
12 -8 -1 4.88 0.93
12 -8 -1 5.26 0.99
12 -8 -1 3.63 0.8
12 -8 -1 4.11 0.86
12 -8 -1 3.55 0.81
12 -8 -1 4.99 0.53
-12 8 2 12.02 1.71
-12 8 2 13.12 1.8
-12 8 2 15.34 1.19
-12 8 2 13.75 1.66
12 -8 -2 14.45 1.14
12 -8 -2 15.51 1.22
12 -8 -2 14.51 1.36
12 -8 -2 15.85 1.37
12 -8 -2 12.25 1.43
-12 8 3 127.63 4.03
-12 8 3 130.38 4.32
-12 8 3 138.86 3.6
-12 8 3 135.98 4.37
12 -8 -3 131.08 4.08
12 -8 -3 132.42 3.65
12 -8 -3 132.96 3.37
12 -8 -3 132.47 3.35
12 -8 -3 134.87 3.6
-12 8 4 27.98 1.44
-12 8 4 22.4 1.89
-12 8 4 25.73 1.88
12 -8 -4 25.08 1.44
12 -8 -4 26.32 1.55
12 -8 -4 26.3 1.69
-12 8 5 23.33 1.88
-12 8 5 17.55 1.76
-12 8 5 20.16 1.4
-12 8 5 20.17 1.76
12 -8 -5 21.01 1.39
12 -8 -5 18.84 1.66
12 -8 -5 18.86 1.28
-12 8 6 0.74 0.95
-12 8 6 1 1.11
-12 8 6 0.64 0.6
-12 8 6 2.68 1.04
-12 8 6 2.24 0.72
12 -8 -6 1.6 0.81
-12 8 7 32.31 2.03
-12 8 7 34.93 2.28
-12 8 7 36.68 2.44
-12 8 7 35.67 1.65
-12 8 7 35.66 1.44
12 -8 -7 31.08 1.56
-12 8 8 16.3 1.29
-12 8 8 14.75 1.94
-12 8 8 18.24 2.2
-12 8 9 3.09 0.99
-12 8 9 4.57 1.58
-12 8 9 2.69 1.55
-12 8 9 3.87 1.05
-12 8 10 4.55 1.98
-12 8 10 5.44 2.05
-12 8 10 3.58 1.3
11 -7 10 -2.4 2.67
11 -7 10 -1.31 2.37
11 -7 10 5.32 3.36
11 -7 9 11.29 2.32
11 -7 9 14.36 2.71
11 -7 9 7.97 2.25
11 -7 9 9.93 2.28
11 -7 9 9.9 2.64
-11 7 -8 2.56 1.52
-11 7 -8 1.91 1.22
11 -7 8 0.62 1.86
11 -7 8 2.14 1.79
11 -7 8 1.37 1.4
11 -7 8 0.01 1.85
11 -7 8 2.29 1.7
11 -7 8 -1.06 2.06
-11 7 -7 6.03 1.36
-11 7 -7 8.68 2.2
-11 7 -7 2.79 1.6
-11 7 -7 7.58 1.25
11 -7 7 9.42 1.84
11 -7 7 6.61 1.82
11 -7 7 5.62 1.8
11 -7 7 8.96 1.67
11 -7 7 7.1 1.59
11 -7 7 8.23 1.65
11 -7 7 7.38 1.89
-11 7 -6 7.9 1.61
-11 7 -6 3.42 1.91
-11 7 -6 7.91 1.2
-11 7 -6 7.91 1.23
11 -7 6 6.06 1.61
11 -7 6 6.75 1.58
11 -7 6 6.99 1.39
11 -7 6 6.76 1.49
11 -7 6 6.91 1.39
11 -7 6 4.05 1.47
11 -7 6 6.57 1.35
-11 7 -5 48.97 2.71
-11 7 -5 43.89 2.06
-11 7 -5 45.62 2.14
11 -7 5 46.54 2.32
11 -7 5 47.29 2.78
11 -7 5 51.06 2.63
11 -7 5 46.15 2.52
11 -7 5 50.66 2.87
11 -7 5 46.68 2.47
-11 7 -4 50.23 2.15
-11 7 -4 49.03 2.13
-11 7 -4 50.48 2.61
11 -7 4 57.78 2.81
11 -7 4 59.67 2.7
11 -7 4 56.94 2.51
11 -7 4 59.6 2.88
11 -7 4 56.1 2.58
11 -7 4 58.34 2.36
-11 7 -3 21.82 1.99
-11 7 -3 24.3 2.12
-11 7 -3 19.8 1.37
11 -7 3 20.53 1.84
11 -7 3 20.08 1.67
11 -7 3 21.42 1.65
11 -7 3 20.16 1.38
11 -7 3 16.75 1.64
11 -7 3 19.8 1.77
11 -7 3 17.38 1.73
-11 7 -2 68.22 2.96
-11 7 -2 65.87 2.33
11 -7 2 67.67 2.52
11 -7 2 65.74 2.18
11 -7 2 64.49 2.64
11 -7 2 66.03 2.71
11 -7 2 61.65 2.54
11 -7 2 66.04 2.49
11 -7 2 67.87 2.86
-11 7 -1 10.05 1.02
-11 7 -1 6.71 1.09
-11 7 -1 9.92 1.46
11 -7 1 7.29 1.1
11 -7 1 6.92 0.94
11 -7 1 6.26 1.04
11 -7 1 8.38 1.09
11 -7 1 8.83 0.83
11 -7 1 8.95 1.16
11 -7 1 8.72 1.18
-11 7 0 94.49 3.48
-11 7 0 90.76 2.75
-11 7 0 90.26 3.29
-11 7 0 92.69 3.2
11 -7 0 98.59 3.06
11 -7 0 97.88 3.1
11 -7 0 100.18 3
11 -7 0 98.19 3.37
11 -7 0 97.81 2.99
11 -7 0 99.18 2.47
-11 7 1 58.65 2.48
-11 7 1 63.84 2.74
-11 7 1 66.26 2.14
-11 7 1 62.03 2.62
11 -7 -1 61.45 1.64
11 -7 -1 63.94 2.25
11 -7 -1 64.48 2.54
11 -7 -1 64.4 2.29
11 -7 -1 62.21 2.22
11 -7 -1 65.84 2.21
-11 7 2 76.67 2.31
-11 7 2 72.26 2.87
-11 7 2 70.41 2.66
-11 7 2 72.83 2.84
11 -7 -2 68.33 2.19
11 -7 -2 67.44 2.16
11 -7 -2 71.73 2.3
11 -7 -2 68.1 2.57
11 -7 -2 68.35 2.28
-11 7 3 38.53 1.56
-11 7 3 37.96 2.04
-11 7 3 38.95 1.93
11 -7 -3 40.58 1.6
11 -7 -3 30.11 1.51
11 -7 -3 36.1 1.82
11 -7 -3 37.81 1.34
11 -7 -3 37.3 1.35
-11 7 4 20.05 1.66
-11 7 4 18.92 1.15
-11 7 4 19.99 1.16
-11 7 4 20.53 1.56
11 -7 -4 21.89 1.5
11 -7 -4 19.75 1.2
11 -7 -4 20.54 1.26
-11 7 5 116.92 3.61
-11 7 5 112.12 3.4
-11 7 5 112.26 2.93
-11 7 5 114.15 3
-11 7 5 110.99 3.56
11 -7 -5 106.07 2.85
11 -7 -5 108.81 3.29
11 -7 -5 109.1 2.82
-11 7 6 12.52 0.94
-11 7 6 12.27 0.85
-11 7 6 12.58 1.54
-11 7 6 14.1 1.41
-11 7 6 12.59 1.04
-11 7 6 11.97 1.31
11 -7 -6 12.84 1.2
11 -7 -6 11.98 0.99
-11 7 7 32.74 2.15
-11 7 7 29.72 1.81
-11 7 7 27.02 1.89
-11 7 7 29.63 1.39
-11 7 7 29.16 1.36
-11 7 7 29.28 1.23
-11 7 8 8.6 1.49
-11 7 8 7.4 0.99
-11 7 8 7.2 1.02
-11 7 8 8.99 1.28
-11 7 9 14.6 1.6
-11 7 9 13.04 1.41
-11 7 9 14.79 1.78
-11 7 10 6.54 1.72
-11 7 10 9.07 2.19
-11 7 10 4.94 1.38
-11 7 10 6.1 1.51
-11 7 11 -0.52 1.63
-11 7 11 3.64 2.08
-11 7 11 -0.95 2.22
10 -6 10 4.05 2.21
10 -6 10 4.38 2.82
10 -6 10 5.15 2.15
10 -6 10 2.54 2.1
-10 6 -9 -2 1.36
10 -6 9 3.12 1.83
10 -6 9 2.49 2.16
10 -6 9 0.28 1.83
10 -6 9 3.46 1.79
10 -6 9 0.8 1.66
10 -6 9 2.59 1.94
-10 6 -8 20.81 2.3
-10 6 -8 22.96 1.68
-10 6 -8 19.76 2.1
-10 6 -8 19.72 2.69
10 -6 8 21.72 3.05
10 -6 8 23.93 2.64
10 -6 8 24.17 2.71
10 -6 8 19.73 2.6
10 -6 8 25.15 2.73
10 -6 8 20.99 2.85
10 -6 8 20.48 2.61
-10 6 -7 41.58 3.34
-10 6 -7 39.26 2.22
-10 6 -7 42.38 1.94
10 -6 7 38.03 2.59
10 -6 7 39.65 2.84
10 -6 7 39.71 2.96
10 -6 7 37.97 2.52
10 -6 7 39.06 3.01
10 -6 7 33.83 2.5
-10 6 -6 2.12 0.88
-10 6 -6 2.19 1.28
-10 6 -6 2.21 0.89
10 -6 6 2.36 1.24
10 -6 6 1.68 1.04
10 -6 6 1.9 1.07
10 -6 6 3.28 1.02
10 -6 6 1.29 1.34
10 -6 6 1.44 1.23
10 -6 6 3.57 1.06
-10 6 -5 45.87 3.09
-10 6 -5 44.95 2.01
-10 6 -5 43.03 1.83
10 -6 5 41.27 2.12
10 -6 5 43.19 2.3
10 -6 5 39.86 2.11
10 -6 5 44.17 2.51
10 -6 5 44.07 2.5
10 -6 5 41.42 2.49
-10 6 -4 13.92 1.83
-10 6 -4 11.7 1.61
-10 6 -4 15.87 1.22
-10 6 -4 13.62 1.26
10 -6 4 13.24 1.65
10 -6 4 13.84 1.48
10 -6 4 13.2 1.59
10 -6 4 11.77 1.54
10 -6 4 14.78 1.31
10 -6 4 13.11 1.41
-10 6 -3 78.42 2.56
-10 6 -3 80.26 2.99
10 -6 3 77.65 2.86
10 -6 3 77.89 2.97
10 -6 3 81.86 2.55
10 -6 3 72.2 2.98
10 -6 3 75.51 2.6
10 -6 3 75.92 2.81
-10 6 -2 61.7 2.61
-10 6 -2 59.89 2.09
-10 6 -2 59.91 2.48
-10 6 -2 59.99 2.71
10 -6 2 58.79 2.44
10 -6 2 61.79 2.23
10 -6 2 60.65 2.34
10 -6 2 60.61 2
10 -6 2 58.72 2.35
10 -6 2 59.96 2.53
-10 6 -1 16.4 1.46
-10 6 -1 17.02 1.09
-10 6 -1 17.19 1.41
-10 6 -1 17.89 1.63
10 -6 1 18.93 1.35
10 -6 1 16.45 1.36
10 -6 1 17.6 1.26
10 -6 1 16.22 1.28
10 -6 1 18.54 1.25
10 -6 1 18.1 0.97
-10 6 0 105.02 2.83
-10 6 0 95.71 3.13
-10 6 0 104.51 3.45
-10 6 0 96.2 3.24
10 -6 0 106.26 3.35
10 -6 0 101.25 2.5
10 -6 0 107.21 3.04
10 -6 0 99.19 3.06
10 -6 0 98.68 2.92
10 -6 0 106.49 2.92
-10 6 1 28.27 1.68
-10 6 1 25.99 1.24
-10 6 1 25.57 1.67
-10 6 1 29.3 1.59
10 -6 -1 30.9 1.36
10 -6 -1 28.62 1.42
10 -6 -1 28.83 1.55
10 -6 -1 29.29 0.97
10 -6 -1 29.08 1.39
10 -6 -1 30.84 1.43
-10 6 2 21.16 1.39
-10 6 2 20.99 1.52
-10 6 2 22.1 1.12
-10 6 2 23.07 1.55
10 -6 -2 23.1 1.23
10 -6 -2 25.05 1.16
10 -6 -2 24.93 1.24
10 -6 -2 27 1.2
10 -6 -2 24.15 1.44
-10 6 3 13.78 1.3
-10 6 3 13.4 1.19
-10 6 3 13.63 0.91
-10 6 3 15.58 0.94
10 -6 -3 13.3 0.73
10 -6 -3 12.43 0.93
10 -6 -3 14.54 1
10 -6 -3 14.95 1.18
10 -6 -3 12.69 0.77
-10 6 4 94.09 2.47
-10 6 4 95.18 3.03
-10 6 4 95.05 2.51
-10 6 4 89.04 2.8
10 -6 -4 95.63 2.44
10 -6 -4 77.8 2.75
10 -6 -4 97.53 2.47
-10 6 5 32.1 1.66
-10 6 5 31.85 1.23
-10 6 5 31.38 1.58
-10 6 5 31.84 1.32
-10 6 5 32.54 1.77
-10 6 5 32.2 1.12
10 -6 -5 35.6 1.35
-10 6 6 1.38 0.84
-10 6 6 2.37 0.56
-10 6 6 1.14 0.55
-10 6 6 1.88 0.73
-10 6 6 0.84 0.68
-10 6 6 1.51 0.5
10 -6 -6 0.49 0.59
-10 6 7 10.11 1.28
-10 6 7 11.09 0.93
-10 6 7 9.42 1.23
-10 6 7 11.02 1.33
-10 6 7 10.49 0.84
-10 6 8 7.52 1.07
-10 6 8 9.73 1.51
-10 6 8 7.37 0.81
-10 6 9 25.06 1.89
-10 6 9 22.31 2.17
-10 6 9 25.36 2.54
-10 6 9 24.91 1.77
-10 6 10 2.52 1.49
-10 6 10 5.55 1.81
-10 6 10 4.52 1.2
-10 6 10 4.5 1.43
-10 6 11 0.32 1.77
-10 6 11 3.48 2.09
-10 6 11 2.81 1.84
9 -5 10 11.25 2.19
9 -5 10 12.95 2.33
9 -5 10 14.18 2.8
9 -5 10 12.32 2.28
-9 5 -9 10.08 1.5
9 -5 9 10.95 2.23
9 -5 9 7.4 1.8
9 -5 9 7.64 2.01
9 -5 9 6.61 2.13
9 -5 9 7 2.01
9 -5 9 5.86 1.84
9 -5 9 14.17 2.27
-9 5 -8 3.85 1.15
-9 5 -8 4.73 1.88
-9 5 -8 6.63 0.99
-9 5 -8 4.85 1.53
9 -5 8 3.32 1.4
9 -5 8 5.78 1.85
9 -5 8 3.23 1.37
9 -5 8 5.49 1.49
9 -5 8 4.66 1.67
9 -5 8 5.61 1.64
-9 5 -7 6.95 1.19
-9 5 -7 5.98 0.91
9 -5 7 5.04 1.27
9 -5 7 6 1.56
9 -5 7 5.4 1.23
9 -5 7 6.11 1.28
9 -5 7 6.41 1.39
-9 5 -6 80.38 3.57
-9 5 -6 77.94 2.34
-9 5 -6 76.18 2.64
9 -5 6 73.79 3.03
9 -5 6 71.63 2.69
9 -5 6 74.36 2.97
9 -5 6 80.66 3.39
9 -5 6 74.77 3.22
-9 5 -5 66.79 2.12
-9 5 -5 70.44 2.39
-9 5 -5 68.45 3.09
9 -5 5 60.59 2.73
9 -5 5 60.86 2.36
9 -5 5 64.6 2.53
9 -5 5 60.96 2.8
9 -5 5 65 2.65
-9 5 -4 32.55 1.81
-9 5 -4 31.1 1.51
-9 5 -4 29.57 1.39
-9 5 -4 31.65 2.03
9 -5 4 32.12 1.64
9 -5 4 28.75 1.72
9 -5 4 30.58 1.85
9 -5 4 27.16 1.83
9 -5 4 29.65 1.61
-9 5 -3 51.66 1.84
-9 5 -3 48.02 2.31
-9 5 -3 48.94 2.29
-9 5 -3 48.28 2.12
9 -5 3 48.15 1.89
9 -5 3 48.35 2.04
9 -5 3 49.93 2.26
9 -5 3 48.09 2.16
9 -5 3 49.13 1.86
-9 5 -2 23.21 1.57
-9 5 -2 25.1 1.53
-9 5 -2 23.44 1.2
-9 5 -2 22.57 1.64
9 -5 2 23.74 1.18
9 -5 2 25.34 1.53
9 -5 2 22.88 1.43
9 -5 2 26.48 1.51
9 -5 2 25.17 1.32
-9 5 -1 165.75 4.33
-9 5 -1 162.18 4.62
-9 5 -1 157.22 3.88
-9 5 -1 163.79 4.47
9 -5 1 162.57 3.75
9 -5 1 161.51 3.94
9 -5 1 163.14 4.41
9 -5 1 166.24 4.28
9 -5 1 161.01 4.54
9 -5 1 162 4.17
-9 5 0 69.5 2.47
-9 5 0 70.82 2.58
-9 5 0 69.35 2.07
-9 5 0 72.2 2.4
9 -5 0 70.91 2.48
9 -5 0 70.98 2.15
9 -5 0 73.2 1.88
9 -5 0 72.42 2.32
9 -5 0 70.38 2.23
-9 5 1 24.37 1.44
-9 5 1 25 1.35
-9 5 1 24.09 0.89
-9 5 1 27.56 1.52
-9 5 1 24.71 1.11
9 -5 -1 22.35 1.08
9 -5 -1 22.42 1.12
9 -5 -1 17.37 1.03
9 -5 -1 22.07 0.78
9 -5 -1 23.37 1.3
9 -5 -1 19.39 1.1
-9 5 2 163.1 4.19
-9 5 2 171.29 4.51
-9 5 2 164.95 3.42
-9 5 2 169.52 3.85
9 -5 -2 174.37 4.51
9 -5 -2 176.04 4.01
9 -5 -2 168.21 3.9
9 -5 -2 164.78 4.02
9 -5 -2 170.77 3.96
-9 5 3 21.51 0.98
-9 5 3 22.26 1.02
-9 5 3 23.07 1.23
-9 5 3 21.14 1.32
-9 5 3 22.32 0.76
9 -5 -3 22.13 0.98
9 -5 -3 23.35 0.85
9 -5 -3 22.95 1.04
9 -5 -3 23.8 0.85
9 -5 -3 22.96 1.26
-9 5 4 92.77 2.8
-9 5 4 89.17 2.29
-9 5 4 92.46 2.78
-9 5 4 92.43 2.6
-9 5 4 89.68 2.12
-9 5 4 91.55 2.36
9 -5 -4 87.3 2.63
9 -5 -4 88.53 2.24
9 -5 -4 86.75 2.22
-9 5 5 8.04 0.74
-9 5 5 7.63 0.64
-9 5 5 8.01 0.97
-9 5 5 10.43 1.11
-9 5 5 9.19 0.94
9 -5 -5 7.7 0.88
9 -5 -5 8.5 0.74
-9 5 6 81.1 2.11
-9 5 6 77.42 2.42
-9 5 6 75.95 2.27
-9 5 6 75.63 2
-9 5 6 77.78 2.71
9 -5 -6 78.54 2.19
-9 5 7 38.93 2.04
-9 5 7 38.7 1.33
-9 5 7 37.89 1.59
-9 5 7 40.19 1.34
-9 5 7 38.21 1.55
-9 5 8 18.48 1.28
-9 5 8 17.96 1.73
-9 5 8 19.3 1
-9 5 9 10.24 1.08
-9 5 9 8.28 1.53
-9 5 9 7.28 0.94
-9 5 9 9.34 1.64
-9 5 10 2.25 1.47
-9 5 10 7.47 1.82
-9 5 10 5.03 1.08
-9 5 10 4.63 1.39
-9 5 11 16.79 2.09
-9 5 11 14.76 1.89
-9 5 11 14.77 2.11
-9 5 11 20.36 2.96
8 -4 11 3.5 2.73
8 -4 11 -4.77 2.33
8 -4 11 3.68 2.02
8 -4 11 6.69 2.3
8 -4 10 5.05 1.67
8 -4 10 6.6 1.84
8 -4 10 4.14 1.8
8 -4 10 1.72 2.17
8 -4 10 7.37 1.86
8 -4 10 3.36 2.06
-8 4 -9 2.59 1.16
-8 4 -9 1.21 2.04
-8 4 -9 4.67 1.42
8 -4 9 3.6 1.49
8 -4 9 4.2 1.48
8 -4 9 4.4 1.39
8 -4 9 -0.15 1.38
8 -4 9 2.81 1.37
8 -4 9 3.5 1.83
-8 4 -8 14.41 1.66
-8 4 -8 14.51 1.51
-8 4 -8 18.11 2.27
8 -4 8 16.95 2.41
8 -4 8 13.07 1.7
8 -4 8 14.74 1.9
8 -4 8 14.6 1.91
8 -4 8 12.95 1.82
8 -4 8 14.83 1.87
-8 4 -7 21.2 1.21
-8 4 -7 19.14 1.47
8 -4 7 18.12 1.76
8 -4 7 18.56 1.82
8 -4 7 20.84 1.96
8 -4 7 18.9 2.08
-8 4 -6 94.04 3.65
-8 4 -6 91.04 2.8
-8 4 -6 93.23 2.48
8 -4 6 96.91 3.03
8 -4 6 102.74 3.76
8 -4 6 97.11 3.54
8 -4 6 102.89 3.43
8 -4 6 100.7 3.36
-8 4 -5 45.45 1.52
-8 4 -5 37.62 1.71
-8 4 -5 38.08 2.26
8 -4 5 45.23 2.18
8 -4 5 45.09 2.04
8 -4 5 43.65 1.84
8 -4 5 45.1 2.05
8 -4 5 43.6 2.27
-8 4 -4 93.97 3.3
-8 4 -4 94.5 2.89
-8 4 -4 93.5 2.67
-8 4 -4 95.52 2.44
8 -4 4 91.13 2.84
8 -4 4 89.06 2.91
8 -4 4 91.18 3.11
8 -4 4 89.61 3.14
8 -4 4 92.47 2.68
-8 4 -3 148.39 3.5
-8 4 -3 147.79 4.27
-8 4 -3 156.03 4.03
-8 4 -3 152.77 3.7
-8 4 -3 148.04 4.34
8 -4 3 148.17 3.68
8 -4 3 148.18 4
8 -4 3 144.73 4.2
8 -4 3 151.25 4.28
8 -4 3 149.45 3.79
-8 4 -2 186.48 4.68
-8 4 -2 186.08 4.29
-8 4 -2 189.55 5.04
-8 4 -2 181.83 4.87
8 -4 2 178.2 4.79
8 -4 2 172.91 4.65
8 -4 2 174.93 4.48
8 -4 2 181.4 4.17
8 -4 2 180.5 4.16
-8 4 -1 231.8 5.76
-8 4 -1 234.31 5.14
-8 4 -1 239.42 5.6
8 -4 1 233.53 5.73
8 -4 1 246.66 5.94
8 -4 1 232.13 5.14
8 -4 1 225.21 5.51
8 -4 1 236.24 5.04
-8 4 0 120.22 3.46
-8 4 0 120.03 3.22
-8 4 0 119.61 2.76
-8 4 0 121.65 3.36
-8 4 0 120.16 2.93
8 -4 0 123.23 2.75
8 -4 0 116.99 3.07
8 -4 0 126.47 3.23
8 -4 0 119.69 2.96
-8 4 1 107.63 2.63
-8 4 1 105.74 3.05
-8 4 1 107.14 2.91
-8 4 1 107.18 2.37
-8 4 1 108.72 3.13
8 -4 -1 105.99 2.79
8 -4 -1 103.83 2.66
8 -4 -1 106.59 2.63
8 -4 -1 103.83 2.32
8 -4 -1 110.55 3.08
-8 4 2 105.61 2.29
-8 4 2 107.51 2.84
-8 4 2 107.25 2.59
-8 4 2 106.54 3.04
8 -4 -2 100.1 2.53
8 -4 -2 104.56 2.48
8 -4 -2 97.27 2.85
8 -4 -2 101.41 2.47
8 -4 -2 101.08 2.48
-8 4 3 24.45 0.99
-8 4 3 25.68 1.27
-8 4 3 25.88 0.91
-8 4 3 25 1.13
-8 4 3 25.32 0.85
8 -4 -3 27.28 1.27
8 -4 -3 26.12 0.92
8 -4 -3 25.72 1.02
-8 4 4 70.31 1.84
-8 4 4 71.57 2.24
-8 4 4 62.66 1.69
-8 4 4 63.16 2.1
-8 4 4 73.34 1.97
8 -4 -4 70.24 1.8
-8 4 5 6.73 0.81
-8 4 5 6.4 0.56
-8 4 5 6.88 0.92
-8 4 5 6.28 0.69
-8 4 5 7.26 0.64
8 -4 -5 6.79 0.72
8 -4 -5 6.82 0.58
-8 4 6 73.6 2.55
-8 4 6 72.28 2.01
-8 4 6 72.45 1.9
-8 4 6 74.45 2.22
-8 4 6 75.45 1.94
-8 4 7 9.11 0.91
-8 4 7 8.87 0.79
-8 4 7 10.33 0.87
-8 4 7 11.16 1.35
-8 4 7 8.64 0.75
-8 4 8 17.59 1.02
-8 4 8 17.18 1.68
-8 4 8 17.23 1.11
-8 4 8 18.87 1.8
-8 4 9 9.98 1.62
-8 4 9 8.49 0.97
-8 4 9 9.65 1.14
-8 4 9 12.61 1.63
-8 4 10 9.78 1.65
-8 4 10 10.4 2.02
-8 4 10 12.14 1.2
-8 4 10 11.91 1.16
-8 4 11 3.73 0.92
-8 4 11 3.28 0.95
-8 4 11 4.07 1.61
-8 4 11 5.86 1.18
-8 4 11 5.17 1.71
-8 4 11 2.97 2.11
-8 4 12 -1.11 2.06
-8 4 12 3.49 2.01
-8 4 12 1.38 2.33
7 -3 11 -0.65 2.11
7 -3 11 0.28 2.52
7 -3 11 6.89 2.27
7 -3 11 4.81 2.12
7 -3 11 2.03 1.76
-7 3 -10 0.45 1.16
7 -3 10 2.46 1.61
7 -3 10 1.91 1.44
7 -3 10 2.11 1.78
7 -3 10 -0.05 1.4
7 -3 10 2 1.96
7 -3 10 -1.18 1.48
-7 3 -9 19.43 2.59
-7 3 -9 13.61 1.56
-7 3 -9 17.37 1.66
7 -3 9 16.78 1.96
7 -3 9 11.79 1.69
7 -3 9 19.79 2.18
7 -3 9 20.13 2.51
7 -3 9 17.43 2.38
7 -3 9 17.07 2.16
-7 3 -8 27.44 1.39
-7 3 -8 29.06 1.64
7 -3 8 27.92 2.57
7 -3 8 27.85 2.03
7 -3 8 29.92 2.17
7 -3 8 29.39 2.04
7 -3 8 27.48 2.34
-7 3 -7 1.21 0.68
-7 3 -7 2.62 1.16
-7 3 -7 1.17 0.57
-7 3 -7 0.46 0.86
7 -3 7 1.68 0.91
7 -3 7 2.28 0.98
7 -3 7 -0.01 0.81
7 -3 7 2.37 0.98
7 -3 7 1.59 0.89
-7 3 -6 12.55 1.05
-7 3 -6 11.07 0.87
-7 3 -6 10.63 1.31
-7 3 -6 11.77 1.49
7 -3 6 13.11 1.53
7 -3 6 13.19 1.35
7 -3 6 12.52 1.33
7 -3 6 12.21 1.37
7 -3 6 12.47 1.16
-7 3 -5 29.67 1.13
-7 3 -5 27.27 1.35
-7 3 -5 33.29 1.96
7 -3 5 32.36 1.63
7 -3 5 29.77 1.43
7 -3 5 29.98 1.68
7 -3 5 31.3 1.67
7 -3 5 32.97 1.84
-7 3 -4 481.58 11.07
-7 3 -4 482.21 9.64
-7 3 -4 482.93 9.79
7 -3 4 488.81 10.06
7 -3 4 505.87 11.37
7 -3 4 490.55 10.82
7 -3 4 487.18 11.43
7 -3 4 504.39 10.45
-7 3 -3 114.07 3.42
-7 3 -3 117.29 2.92
-7 3 -3 115.86 2.7
-7 3 -3 116.72 3.14
-7 3 -3 121.16 3.5
7 -3 3 123.21 3.58
7 -3 3 125.45 3.27
7 -3 3 124.44 3.1
7 -3 3 131.14 3.64
7 -3 3 122.34 3.36
-7 3 -2 8.22 0.98
-7 3 -2 8.69 0.87
-7 3 -2 7.96 0.69
-7 3 -2 7.68 0.92
7 -3 2 7.04 0.71
7 -3 2 7.77 0.86
7 -3 2 7.29 0.84
7 -3 2 7.44 0.79
7 -3 2 6.18 0.7
-7 3 -1 62 1.73
-7 3 -1 58.62 1.99
-7 3 -1 60.82 1.92
7 -3 1 58.21 1.95
7 -3 1 59.37 1.88
7 -3 1 60.56 1.72
7 -3 1 58.99 1.67
7 -3 1 58.93 2.01
-7 3 0 626.65 12.24
-7 3 0 634.45 12.15
-7 3 0 659.26 13.89
-7 3 0 619.66 13.11
-7 3 0 608.47 13.48
7 -3 0 667.65 14.32
7 -3 0 658.9 12.56
7 -3 0 641.14 13.53
7 -3 0 642.13 12.66
-7 3 1 511.08 10.06
-7 3 1 518.08 10.79
-7 3 1 512.78 9.88
-7 3 1 514.64 11.39
7 -3 -1 539.76 10.86
7 -3 -1 518.43 10.14
7 -3 -1 530.21 10.34
7 -3 -1 539.1 11.69
7 -3 -1 517.21 10.99
-7 3 2 78.22 2.08
-7 3 2 75.28 1.72
-7 3 2 75.35 1.89
-7 3 2 73.88 2.21
7 -3 -2 82.91 2.27
7 -3 -2 74.48 1.9
7 -3 -2 73.93 1.83
7 -3 -2 77.77 1.93
-7 3 3 4.18 0.58
-7 3 3 5.05 0.52
-7 3 3 4.82 0.58
-7 3 3 4.5 0.61
-7 3 3 4.88 0.42
7 -3 -3 4.73 0.51
7 -3 -3 4.34 0.59
7 -3 -3 3.55 0.38
-7 3 4 3.93 0.57
-7 3 4 3.41 0.4
-7 3 4 3.45 0.43
-7 3 4 3.34 0.55
-7 3 4 3.84 0.45
7 -3 -4 3.97 0.43
-7 3 5 200.67 4.83
-7 3 5 202.84 4.23
-7 3 5 199.65 4.36
-7 3 5 200.97 4.3
-7 3 5 198.26 4.74
7 -3 -5 205.42 4.76
7 -3 -5 210.62 4.18
-7 3 6 71.74 1.87
-7 3 6 76.46 1.92
-7 3 6 74.52 2.48
-7 3 6 73.48 2.17
-7 3 6 71.64 1.91
-7 3 7 4.44 0.64
-7 3 7 4.97 1.08
-7 3 7 5.03 0.69
-7 3 7 5.1 0.91
-7 3 7 3.96 0.6
-7 3 8 29.58 2.07
-7 3 8 26.77 1.26
-7 3 8 27.81 1.24
-7 3 8 26.81 1.74
-7 3 9 5.09 1.33
-7 3 9 3.76 0.74
-7 3 9 1.99 0.93
-7 3 9 3.01 0.73
-7 3 10 23.01 1.45
-7 3 10 24.17 2.75
-7 3 10 22.29 1.61
-7 3 10 27.02 2.26
-7 3 11 0.22 1.67
-7 3 11 1.84 1.55
-7 3 11 0.88 1.55
-7 3 11 3.43 1.12
-7 3 11 0.01 0.92
-7 3 11 3.45 1.1
-7 3 12 1.99 1.99
-7 3 12 2.91 2.49
-7 3 12 3.54 2.02
6 -2 11 3.51 1.55
6 -2 11 7.24 2.37
6 -2 11 2.37 1.87
6 -2 11 2.98 1.9
6 -2 11 3.43 2.34
6 -2 10 2.08 1.6
6 -2 10 2.3 1.91
6 -2 10 2.22 1.35
6 -2 10 2.76 1.22
6 -2 10 1.57 1.34
6 -2 10 2.97 1.33
-6 2 -9 8.39 1.16
-6 2 -9 9.17 1.06
6 -2 9 7.27 1.24
6 -2 9 8.85 1.39
6 -2 9 11.55 1.99
6 -2 9 8.42 1.36
6 -2 9 10.65 1.44
6 -2 9 11.31 1.88
-6 2 -8 1.38 0.74
6 -2 8 1.31 0.86
6 -2 8 -0.2 0.82
6 -2 8 0.71 0.92
6 -2 8 2.46 1.22
6 -2 8 2.43 1.08
-6 2 -7 25.78 1.54
-6 2 -7 24.86 1.31
-6 2 -7 27.06 2.17
-6 2 -7 24.57 1.14
6 -2 7 21.57 1.87
6 -2 7 23.61 1.61
6 -2 7 22.16 1.63
6 -2 7 24.28 1.84
6 -2 7 21.37 1.59
-6 2 -6 40.01 2.21
-6 2 -6 39.93 1.49
-6 2 -6 38.74 1.3
-6 2 -6 38.12 1.69
6 -2 6 38.86 2.09
6 -2 6 38.41 1.55
6 -2 6 38.49 1.85
6 -2 6 38.92 1.73
6 -2 6 39.04 1.96
-6 2 -5 18.97 0.83
-6 2 -5 14.98 1.14
-6 2 -5 18.43 1.49
-6 2 -5 17.12 0.97
6 -2 5 18.44 1.4
6 -2 5 16.57 1.26
6 -2 5 16.79 1.23
6 -2 5 16.97 1.01
6 -2 5 16.61 1.13
-6 2 -4 59.68 1.52
-6 2 -4 58.72 2.25
6 -2 4 60.11 2.11
6 -2 4 57.54 2.19
6 -2 4 58.92 1.97
6 -2 4 58.97 2.08
6 -2 4 59.38 1.79
-6 2 -3 103.76 2.55
-6 2 -3 105.21 3.05
-6 2 -3 103.55 3.01
-6 2 -3 105.9 2.7
-6 2 -3 104.4 2.32
6 -2 3 108.12 3.1
6 -2 3 108.21 2.87
6 -2 3 108.58 2.63
6 -2 3 106.02 2.85
6 -2 3 104.44 3.03
-6 2 -2 570.18 12.8
-6 2 -2 640.39 11.62
-6 2 -2 576.29 13.08
-6 2 -2 591.07 12.35
6 -2 2 583.3 12.34
6 -2 2 588.46 11.53
6 -2 2 583.93 12.77
6 -2 2 599.12 11.73
6 -2 2 604.49 13.05
-6 2 -1 315.19 6.4
-6 2 -1 316.66 6.34
-6 2 -1 304.49 7.02
-6 2 -1 311.5 6.8
-6 2 -1 324.57 7.23
6 -2 1 312.71 7.24
6 -2 1 322.68 6.59
6 -2 1 331.4 6.57
6 -2 1 337.84 7.46
-6 2 0 180.37 3.79
-6 2 0 181.87 3.73
-6 2 0 184.72 4.35
-6 2 0 176.58 4.08
-6 2 0 175.03 4.21
6 -2 0 170.53 3.52
6 -2 0 154.21 3.4
6 -2 0 167.56 3.78
-6 2 1 201.85 4.54
-6 2 1 204.99 4.12
-6 2 1 212.44 4.85
-6 2 1 203.39 4.23
6 -2 -1 207.58 4.18
6 -2 -1 208.67 4.31
6 -2 -1 213.17 4.43
6 -2 -1 216.11 4.92
6 -2 -1 203.43 4.57
-6 2 2 302.88 5.98
-6 2 2 300.1 6.41
-6 2 2 300.58 6.35
-6 2 2 310.11 6.05
-6 2 2 310.18 6.85
6 -2 -2 340.27 7.37
6 -2 -2 324.94 6.67
6 -2 -2 321.39 6.78
6 -2 -2 335.61 6.51
-6 2 3 500.28 10.35
-6 2 3 501.8 10.33
-6 2 3 519.41 9.82
-6 2 3 511.62 11.04
6 -2 -3 520.79 9.99
-6 2 4 228.99 4.41
-6 2 4 203.13 4.78
-6 2 4 207.06 4.86
-6 2 4 201.28 4.44
-6 2 4 206.73 4.31
6 -2 -4 195.16 3.96
-6 2 5 35.99 1.09
-6 2 5 36.96 1.12
-6 2 5 36.6 1.14
-6 2 5 36.49 1.5
-6 2 5 36.64 1.31
6 -2 -5 36.19 1.16
6 -2 -5 34.17 0.98
-6 2 6 40.27 1.24
-6 2 6 43.05 1.97
-6 2 6 40.34 1.72
-6 2 6 38.96 1.44
-6 2 6 40.43 1.34
-6 2 6 41.14 1.28
-6 2 7 65.83 1.81
-6 2 7 66.27 2.01
-6 2 7 71.1 2.79
-6 2 7 67.67 2.4
-6 2 7 64.25 1.97
-6 2 7 64.91 1.84
-6 2 8 22.59 1.28
-6 2 8 26.57 2.01
-6 2 8 23.9 1.15
-6 2 8 26.03 1.2
-6 2 8 25.98 1.68
-6 2 9 6.81 0.9
-6 2 9 5.46 1.18
-6 2 9 5.05 0.83
-6 2 9 6.41 1.49
-6 2 10 8.69 1.49
-6 2 10 8.11 1.09
-6 2 10 8.99 1.09
-6 2 10 9.35 1.77
-6 2 11 3.91 1.99
-6 2 11 0.34 1.4
-6 2 11 2.35 1.07
-6 2 11 3.71 1.29
-6 2 11 1.01 1.16
-6 2 12 7.63 1.95
-6 2 12 7.29 2.08
-6 2 12 5.84 1.23
-6 2 12 4.44 2.4
5 -1 11 1.43 1.23
5 -1 11 -3.46 1.83
5 -1 11 0.88 1.68
5 -1 11 -1.81 1.51
5 -1 11 0.77 1.19
5 -1 11 -1.03 2.05
5 -1 10 13.96 1.82
5 -1 10 14.44 1.97
5 -1 10 13.5 2.22
5 -1 10 13.41 1.67
5 -1 10 14.45 2.15
5 -1 10 14.38 1.75
5 -1 9 17.78 1.61
5 -1 9 20.87 1.39
5 -1 9 20.44 1.69
5 -1 9 18.47 1.78
5 -1 9 18.53 2.3
5 -1 9 21.99 2.35
-5 1 -8 3.86 0.66
-5 1 -8 4.85 0.79
5 -1 8 6.22 0.84
5 -1 8 4.71 0.95
5 -1 8 7.02 1.31
5 -1 8 4.47 0.91
5 -1 8 4.63 0.99
5 -1 8 7.23 1.36
-5 1 -7 17.49 1.19
-5 1 -7 16.74 1.01
-5 1 -7 18.2 1.93
5 -1 7 18.58 1.7
5 -1 7 19 1.35
5 -1 7 17.44 1.63
5 -1 7 16.21 1.05
5 -1 7 15.16 1.3
5 -1 7 17.42 1.28
-5 1 -6 2.51 0.9
-5 1 -6 3.33 0.53
-5 1 -6 3.69 0.54
-5 1 -6 2.73 0.66
5 -1 6 3.31 0.76
5 -1 6 2.7 0.86
5 -1 6 3.66 0.66
5 -1 6 3.47 0.57
5 -1 6 3.84 0.75
5 -1 6 2.62 0.73
-5 1 -5 79.68 1.93
-5 1 -5 79.62 2.75
-5 1 -5 78.9 2.18
-5 1 -5 76.88 2.03
5 -1 5 76.21 1.94
5 -1 5 79.23 2.68
5 -1 5 76.91 2.29
5 -1 5 74.81 2.07
5 -1 5 77.43 2.54
5 -1 5 77.32 2.41
-5 1 -4 25.34 1.4
-5 1 -4 25.85 0.98
-5 1 -4 25.53 0.84
5 -1 4 25.13 0.87
5 -1 4 25.1 1.3
5 -1 4 24.47 1.13
5 -1 4 22.96 1.32
5 -1 4 25.68 1.02
5 -1 4 28.45 1.24
-5 1 -3 113.01 3.07
-5 1 -3 120.83 3.18
5 -1 3 103.83 2.44
5 -1 3 107.42 2.95
5 -1 3 103.93 2.75
5 -1 3 104.92 2.66
5 -1 3 107.29 2.85
-5 1 -2 174.29 3.59
-5 1 -2 157.14 3.95
-5 1 -2 167.54 4
-5 1 -2 159.85 3.68
5 -1 2 162.52 3.78
5 -1 2 149.55 3.52
5 -1 2 146.19 3.72
5 -1 2 155.24 3.28
5 -1 2 152.43 3.47
-5 1 -1 37.14 1.17
-5 1 -1 37.81 1.28
-5 1 -1 36.12 1.23
-5 1 -1 36.88 1.07
-5 1 -1 36.51 1.15
5 -1 1 34.59 1.01
5 -1 1 34.66 1.2
5 -1 1 32.44 1.15
5 -1 1 32.46 1.1
5 -1 1 32.92 1.06
-5 1 0 165.8 3.86
-5 1 0 161.8 3.73
-5 1 0 165.4 3.39
-5 1 0 162.41 3.64
-5 1 0 165.21 3.37
5 -1 0 159.7 3.57
5 -1 0 151.29 3.12
5 -1 0 150 3.09
5 -1 0 136.11 3.31
-5 1 1 38.49 1.05
-5 1 1 37.38 1
-5 1 1 37.75 1.22
-5 1 1 38.32 1.12
-5 1 1 38.16 1.1
5 -1 -1 34.32 1.04
5 -1 -1 34.58 0.95
5 -1 -1 39.1 1.21
5 -1 -1 34.93 1.04
5 -1 -1 34.61 0.99
-5 1 3 124.78 2.68
-5 1 3 126.1 2.74
-5 1 3 123.49 3.01
-5 1 3 123.35 2.97
5 -1 -3 116.24 2.81
5 -1 -3 115.82 2.48
-5 1 4 293.15 5.78
-5 1 4 287.1 6.23
-5 1 4 281.8 5.99
-5 1 4 292.73 6.47
5 -1 -4 286.02 6.24
5 -1 -4 294.1 5.72
-5 1 5 56.58 1.86
-5 1 5 54.65 2.09
-5 1 5 54.22 1.51
-5 1 5 54.55 1.68
-5 1 5 55.81 1.47
5 -1 -5 55.39 1.61
5 -1 -5 58.07 1.42
5 -1 -5 55.38 1.86
-5 1 6 77.56 2.44
-5 1 6 76.71 2.02
-5 1 6 81.77 2.08
-5 1 6 82.6 2.29
-5 1 6 80.48 2.83
5 -1 -6 77.35 2.42
-5 1 7 87.91 2.32
-5 1 7 93.02 3.28
-5 1 7 86.7 2.79
-5 1 7 88.12 2.54
-5 1 7 88.71 2.32
-5 1 8 21.66 1.32
-5 1 8 24.59 1.97
-5 1 8 25.2 1.59
-5 1 8 23.38 1.25
-5 1 9 13.1 1.43
-5 1 9 13.79 1.24
-5 1 9 11.99 1.62
-5 1 10 4.62 1.51
-5 1 10 5.45 1.29
-5 1 10 4.18 1
-5 1 11 3.12 1.48
-5 1 11 4.04 1.42
-5 1 11 6.56 1.27
-5 1 11 7 2.16
-5 1 11 3.82 1.2
-5 1 12 14.87 2.38
-5 1 12 7.63 1.49
-5 1 12 8.09 1.99
-5 1 12 8.97 2.56
-5 1 12 8.05 1.75
4 0 12 3.35 2.66
4 0 12 7.3 2.55
4 0 11 10.56 2.15
4 0 11 10.47 2.36
4 0 11 10.32 1.69
4 0 11 10.33 1.6
4 0 10 5.13 1.81
4 0 10 1.8 1.14
4 0 10 1.26 0.86
4 0 10 1.04 1.49
4 0 10 2.69 0.94
4 0 10 3.13 1.16
4 0 9 3.12 0.95
4 0 9 3.46 0.89
4 0 9 4.26 1.58
4 0 9 4.38 0.86
4 0 9 4.02 0.94
4 0 9 3.52 1.22
4 0 8 94.09 3.47
4 0 8 95.65 3.65
4 0 8 89.78 2.61
4 0 8 92.15 2.85
4 0 8 91.79 2.81
4 0 8 91.35 2.85
4 0 7 57.73 2.46
4 0 7 55.26 2
4 0 7 57.03 2.6
4 0 7 59.69 2.02
4 0 7 58.12 2.01
4 0 7 58.25 1.84
-4 0 -6 12.09 1.39
-4 0 -6 9.03 0.76
-4 0 -6 8.84 0.66
4 0 6 8.47 0.86
4 0 6 11.39 1.25
4 0 6 9.7 0.91
4 0 6 7.11 0.85
4 0 6 9.99 1.18
4 0 6 10.77 0.82
-4 0 -5 5.97 0.9
-4 0 -5 5.26 0.63
-4 0 -5 5.35 0.52
4 0 5 6.24 0.85
4 0 5 5.88 0.7
4 0 5 5.31 0.67
4 0 5 6.49 0.83
4 0 5 6.15 0.6
4 0 5 5.66 0.62
-4 0 -4 4.97 0.57
-4 0 -4 6.3 0.85
-4 0 -4 5.2 0.48
4 0 4 6.11 0.61
4 0 4 6.28 0.81
4 0 4 6.2 0.5
4 0 4 5.55 0.74
4 0 4 4.75 0.6
4 0 4 5.04 0.54
-4 0 -3 72.23 1.68
-4 0 -3 70.04 2.11
-4 0 -3 73.63 1.97
4 0 3 73.54 2.04
4 0 3 71.14 1.68
4 0 3 66.93 1.58
4 0 3 73.88 1.8
4 0 3 71.45 1.94
4 0 3 69.78 2.1
-4 0 -2 42.83 1.09
-4 0 -2 46.05 1.39
-4 0 -2 38.56 1.27
4 0 2 42.17 1.3
4 0 2 44.96 1.4
4 0 2 42.32 1.12
4 0 2 43.75 1.2
-4 0 -1 40.94 1.09
-4 0 -1 41.66 1.16
-4 0 -1 41.11 1.17
-4 0 -1 40.72 1.21
4 0 1 42.05 1.06
4 0 1 38.86 1.22
4 0 1 41.35 1.2
4 0 1 46.84 1.16
-4 0 0 135.1 2.74
-4 0 0 131.6 2.71
-4 0 0 132.87 2.91
-4 0 0 136.13 3.09
-4 0 0 134.22 2.75
4 0 0 136.21 2.8
4 0 0 141.54 2.98
4 0 0 136.05 2.78
4 0 0 132.61 2.76
-4 0 1 31.02 0.9
-4 0 1 30.69 0.91
-4 0 1 32.61 0.89
-4 0 1 31.18 0.87
-4 0 1 31.79 0.76
-4 0 1 33.3 1.01
4 0 -1 32.03 0.75
4 0 -1 31.33 0.89
4 0 -1 31.99 1.01
4 0 -1 30.59 0.86
4 0 -1 31.4 0.91
-4 0 2 55.16 1.37
-4 0 2 56.97 1.5
-4 0 2 54.44 1.24
-4 0 2 55.96 1.37
-4 0 2 53.64 1.52
4 0 -2 56.08 1.58
4 0 -2 55.06 1.39
4 0 -2 56.66 1.54
4 0 -2 66.76 1.41
-4 0 3 32.61 1.08
-4 0 3 26.46 0.87
-4 0 3 29.62 0.94
-4 0 3 27.67 1.07
4 0 -3 26.89 1.06
4 0 -3 29.88 0.91
4 0 -3 31.47 1.05
-4 0 4 190.81 3.98
-4 0 4 183.63 4.05
-4 0 4 191.51 4.42
-4 0 4 189.77 4.27
-4 0 4 182.09 4.67
4 0 -4 194.28 3.97
4 0 -4 188.79 4.32
-4 0 5 121.63 2.87
-4 0 5 123.47 2.88
-4 0 5 124.09 3.16
-4 0 5 127.03 3.6
-4 0 5 120.4 3.16
4 0 -5 122.5 2.72
4 0 -5 122.13 2.75
4 0 -5 124.14 3.15
-4 0 6 23.35 1.56
-4 0 6 24.19 1.28
-4 0 6 25.67 1.13
-4 0 6 25.47 1.2
-4 0 6 25.67 1.06
4 0 -6 25.89 0.96
4 0 -6 25.3 1.32
4 0 -6 24.98 0.99
-4 0 7 2.63 0.59
-4 0 7 3.66 0.69
-4 0 7 4.41 0.81
-4 0 7 1.58 0.85
-4 0 7 2.57 0.57
4 0 -7 2.95 0.49
4 0 -7 2.92 0.51
4 0 -7 3.16 0.73
-4 0 8 29.23 1.55
-4 0 8 29 2.05
-4 0 8 27.19 1.4
-4 0 8 31.12 1.69
4 0 -8 30.28 1.76
-4 0 9 28.58 1.65
-4 0 9 31.86 2.46
-4 0 9 27.89 1.83
-4 0 9 24.22 1.73
-4 0 9 29.81 1.61
-4 0 10 7.56 1.28
-4 0 10 7.86 1.22
-4 0 10 5.32 1.03
-4 0 10 5.11 1.05
-4 0 10 4.32 1.23
-4 0 10 7.61 1.74
-4 0 11 2.09 1.25
-4 0 11 4.18 2.01
-4 0 11 1.37 1.31
-4 0 11 2.34 1.5
-4 0 12 -2.06 1.77
-4 0 12 1.61 2.12
-4 0 12 1.22 1.76
-4 0 12 4.22 2.56
3 1 12 1.47 2.5
3 1 12 2.41 1.97
3 1 12 6.78 2.44
3 1 11 11.03 1.51
3 1 11 13.31 1.43
3 1 11 15.29 2.46
3 1 11 15.3 2.27
3 1 11 12.72 1.52
3 1 10 22.17 2.58
3 1 10 24.87 1.7
3 1 10 22.74 1.73
3 1 10 24.12 1.86
3 1 10 21.83 2.77
3 1 9 4.18 1.37
3 1 9 4.28 0.84
3 1 9 3.13 0.88
3 1 9 4.17 1.32
3 1 8 29.27 1.46
3 1 8 28.34 1.46
3 1 8 26.2 2.05
3 1 8 32.6 2.11
3 1 7 11.7 0.99
3 1 7 13.43 0.91
3 1 7 11.24 1.32
3 1 7 13.47 1
3 1 7 10.75 1.39
3 1 6 139.81 3.33
3 1 6 134.76 3.32
3 1 6 131.19 3.23
3 1 6 136.78 3.78
3 1 6 135.91 3.98
3 1 5 62.37 2.23
3 1 5 63.21 2.17
3 1 5 69.46 1.82
3 1 5 65.39 1.79
3 1 5 67.2 1.59
-3 -1 -4 87.13 2.53
3 1 4 93 2.69
3 1 4 90.22 2.55
3 1 4 96.71 2.33
3 1 4 94.98 2.22
3 1 4 94.18 2.03
-3 -1 -3 82.41 2.24
3 1 3 84.8 1.93
3 1 3 83.71 2.23
3 1 3 86.43 1.81
3 1 3 87.66 2.07
3 1 3 81.89 2.29
-3 -1 -2 56.83 1.22
-3 -1 -2 58.29 1.53
-3 -1 -2 54.63 1.39
-3 -1 -2 54.62 1.52
3 1 2 59.46 1.6
3 1 2 62.5 1.31
3 1 2 57.86 1.49
3 1 2 58.79 1.58
-3 -1 -1 225.83 4.77
-3 -1 -1 239.34 4.95
-3 -1 -1 232.66 4.56
-3 -1 -1 208.76 4.38
3 1 1 236 4.65
3 1 1 230.41 4.74
3 1 1 233.26 4.5
3 1 1 233.11 5.05
3 1 1 226.44 4.87
-3 -1 0 12.48 0.48
-3 -1 0 12.71 0.47
-3 -1 0 12.56 0.47
-3 -1 0 13.01 0.52
-3 -1 0 11.83 0.45
-3 -1 0 11.8 0.45
3 1 0 11.09 0.46
3 1 0 10.42 0.43
3 1 0 10.19 0.42
3 1 0 9.64 0.43
3 1 0 12.41 0.51
-3 -1 1 206.05 4.53
-3 -1 1 201.89 4.15
-3 -1 1 201.15 4.05
-3 -1 1 194.48 4.23
-3 -1 1 203.43 4.2
3 1 -1 199.02 4.26
3 1 -1 196.58 4.16
3 1 -1 216.59 4.24
3 1 -1 198.72 4.06
-3 -1 2 107.77 2.43
-3 -1 2 112.61 2.46
-3 -1 2 103.21 2.7
-3 -1 2 111.01 2.53
-3 -1 2 106.68 2.47
-3 -1 2 110.18 2.69
3 1 -2 96.85 2.32
3 1 -2 104.2 2.52
3 1 -2 96.63 2.26
3 1 -2 100.83 2.25
-3 -1 3 3.5 0.43
-3 -1 3 4.58 0.46
-3 -1 3 4.83 0.64
-3 -1 3 3.97 0.55
-3 -1 3 4.18 0.47
-3 -1 3 4.13 0.55
3 1 -3 1.77 0.4
3 1 -3 2.04 0.43
3 1 -3 2 0.38
-3 -1 4 289.88 6.24
-3 -1 4 293 6.87
-3 -1 4 291.2 6.66
-3 -1 4 292.75 6.02
-3 -1 4 291.31 6.21
3 1 -4 294.29 6.08
3 1 -4 302.96 6.37
3 1 -4 302.12 6.8
-3 -1 5 49.57 1.56
-3 -1 5 44.3 1.45
-3 -1 5 48.24 1.65
-3 -1 5 43.92 1.91
-3 -1 5 50.09 1.7
3 1 -5 48.35 1.7
3 1 -5 51.41 1.54
3 1 -5 52.21 1.49
-3 -1 6 105.07 2.99
-3 -1 6 108.62 2.81
-3 -1 6 105.48 3.42
-3 -1 6 103.22 2.72
-3 -1 6 103.45 2.91
3 1 -6 104.36 2.6
3 1 -6 105.85 2.54
3 1 -6 100.81 2.86
-3 -1 7 18.63 1.16
-3 -1 7 19.56 1.28
-3 -1 7 18.4 1.64
-3 -1 7 15.74 1.26
3 1 -7 20.93 1.11
3 1 -7 18.24 1.34
3 1 -7 18.29 1
-3 -1 8 19.34 1.45
-3 -1 8 17.85 1.82
-3 -1 8 17.18 1.43
-3 -1 8 17.75 1.33
-3 -1 8 16.03 1.39
3 1 -8 17.08 1.48
3 1 -8 18.74 1.05
3 1 -8 19.87 1.18
-3 -1 9 6.19 1.46
-3 -1 9 11.15 1.43
-3 -1 9 11.43 1.4
-3 -1 9 10.52 1.37
-3 -1 9 12.09 1.28
3 1 -9 11.96 1.56
-3 -1 10 7.46 1.87
-3 -1 10 6.21 1.45
-3 -1 10 10.7 1.38
-3 -1 10 9.5 1.31
-3 -1 10 9.55 1.45
-3 -1 10 8.81 1.35
-3 -1 10 8.59 1.3
-3 -1 11 7.08 1.37
-3 -1 11 9.47 1.58
-3 -1 11 9.21 1.67
-3 -1 11 9.64 1.83
-3 -1 11 10.1 2.12
-3 -1 11 6.67 1.29
-3 -1 11 8.67 1.53
-3 -1 12 4.47 2.21
-3 -1 12 0.64 1.3
-3 -1 12 -0.38 1.85
-3 -1 12 -0.83 1.58
-3 -1 12 5.03 2.54
-3 -1 12 0.14 1.68
2 2 12 0.97 2.45
2 2 12 -1.61 1.96
2 2 12 -0.25 2.17
2 2 11 9.25 1.41
2 2 11 11.93 2.37
2 2 11 11.54 1.4
2 2 11 9.01 1.69
2 2 11 10.55 2.11
2 2 11 9.25 1.44
2 2 10 4.84 1.66
2 2 10 6.93 1.59
2 2 10 5.5 0.96
2 2 10 6.75 1.13
2 2 10 5.19 1.03
2 2 9 1.82 0.82
2 2 9 4.5 0.86
2 2 9 4.28 1.23
2 2 9 0.6 1.07
2 2 8 26.1 1.94
2 2 8 26.29 2.01
2 2 8 22.87 1.39
2 2 7 56.61 1.94
2 2 7 57.28 2.45
2 2 7 58.08 2.34
2 2 6 113.61 2.91
2 2 6 115.08 3.28
2 2 6 112.89 3.45
2 2 5 14.71 1.02
2 2 5 13.17 1.07
2 2 5 14.43 0.84
2 2 4 33.27 1.15
2 2 4 34.28 1.39
2 2 4 34.1 1.34
2 2 3 27.8 1.08
2 2 3 29.96 1.09
-2 -2 -2 689.57 13.23
2 2 2 681.19 13.03
2 2 2 696.93 14.23
2 2 2 649.46 14.03
2 2 2 689.69 13.88
-2 -2 -1 507.71 10.72
-2 -2 -1 509.16 9.59
-2 -2 -1 508.52 10.36
-2 -2 -1 498.79 9.66
2 2 1 496.9 10.16
2 2 1 501.15 10.38
2 2 1 490.35 9.61
2 2 1 551.87 9.7
2 2 1 483.95 10.13
2 2 1 520.1 10.75
-2 -2 0 2.1 0.31
-2 -2 0 2.11 0.32
-2 -2 0 3.07 0.37
-2 -2 0 1.99 0.3
-2 -2 0 2.21 0.28
-2 -2 0 1.99 0.31
-2 -2 0 2.22 0.3
2 2 0 0.5 0.21
2 2 0 1.21 0.29
2 2 0 1.41 0.22
2 2 0 1.2 0.27
2 2 0 1.11 0.25
2 2 0 1.1 0.27
-2 -2 1 46.17 1.26
-2 -2 1 46.98 1.3
-2 -2 1 45.17 1.32
-2 -2 1 45.83 1.28
2 2 -1 33.98 1.05
2 2 -1 30.49 1.02
2 2 -1 33.96 1.06
2 2 -1 34.5 1.02
2 2 -1 34.27 1.07
-2 -2 2 9.41 0.69
-2 -2 2 6.65 0.61
-2 -2 2 7.01 0.55
-2 -2 2 6.4 0.6
-2 -2 2 5.97 0.64
-2 -2 2 8.05 0.59
2 2 -2 6.25 0.59
2 2 -2 6.03 0.54
2 2 -2 6.4 0.61
2 2 -2 4.15 0.46
2 2 -2 4.54 0.54
2 2 -2 4.67 0.61
-2 -2 3 240.07 5.83
-2 -2 3 251.14 5.28
-2 -2 3 257.42 5.5
-2 -2 3 249.64 5.42
-2 -2 3 249.46 5.35
-2 -2 3 250.22 5.82
2 2 -3 235.92 5.57
2 2 -3 238.31 5
2 2 -3 236.1 5.08
-2 -2 4 59.32 1.8
-2 -2 4 61.34 1.75
-2 -2 4 57.66 1.81
-2 -2 4 59.73 1.81
-2 -2 4 59.3 2.11
-2 -2 4 56.78 1.92
2 2 -4 60.85 2.13
2 2 -4 57.68 1.77
2 2 -4 56.86 1.73
-2 -2 5 5.63 0.95
-2 -2 5 6.93 0.79
-2 -2 5 8.74 0.84
-2 -2 5 7.72 0.9
-2 -2 5 6.09 0.73
2 2 -5 9 0.83
2 2 -5 8.56 1.1
2 2 -5 9.39 0.87
2 2 -5 9.43 0.74
-2 -2 6 48.61 1.8
-2 -2 6 48.12 2.23
-2 -2 6 48.77 1.92
-2 -2 6 47.87 1.71
2 2 -6 50.73 1.64
2 2 -6 48.9 1.83
2 2 -6 52.42 1.79
-2 -2 7 3.76 0.75
-2 -2 7 4.24 0.84
-2 -2 7 3.65 0.88
-2 -2 7 3.36 0.91
-2 -2 7 3.68 0.74
2 2 -7 4.07 0.66
2 2 -7 4 0.75
2 2 -7 3.84 0.84
-2 -2 8 25.38 1.76
-2 -2 8 22.23 1.66
-2 -2 8 25.88 2.14
-2 -2 8 25.57 1.6
-2 -2 8 27.47 1.62
-2 -2 8 24.42 1.71
2 2 -8 24.94 1.29
2 2 -8 25.96 1.66
2 2 -8 24.88 1.49
-2 -2 9 4.45 1.13
-2 -2 9 4.15 1.11
-2 -2 9 4 1.24
-2 -2 9 2.37 1
-2 -2 9 3.77 1.03
-2 -2 9 3.3 1.12
-2 -2 9 1.5 1.29
2 2 -9 2.95 0.77
2 2 -9 1.61 1.02
-2 -2 10 28.2 2.14
-2 -2 10 31.59 2.25
-2 -2 10 28.35 2.06
-2 -2 10 26.44 2.46
-2 -2 10 31.19 2.92
-2 -2 10 31.38 2.37
-2 -2 10 27.88 2.15
2 2 -10 24.65 1.66
2 2 -10 24.05 2.13
-2 -2 11 5.38 2.15
-2 -2 11 0.95 1.49
-2 -2 11 2.35 1.24
-2 -2 11 4.62 1.43
-2 -2 11 2.02 1.67
-2 -2 11 4.16 1.42
-2 -2 11 4.9 1.56
-2 -2 12 3.03 2.36
-2 -2 12 -1.02 2.06
-2 -2 12 0.38 1.98
-2 -2 12 0.31 1.53
-2 -2 12 0.06 2.66
-2 -2 12 1.66 1.82
-2 -2 12 3.88 1.83
1 3 12 3.75 2.25
1 3 12 3.04 2.54
1 3 12 2.75 1.88
1 3 11 0.56 1.89
1 3 11 2.97 1.34
1 3 11 2.12 1.85
1 3 11 2.22 1.48
1 3 10 13.54 1.85
1 3 10 12.2 1.96
1 3 10 11.33 1.4
1 3 10 10.21 1.53
1 3 9 33.38 2.2
1 3 9 25.4 1.97
1 3 9 30.46 1.78
1 3 9 27.45 2.28
1 3 8 23.2 1.44
1 3 8 18.25 1.76
1 3 8 20.54 1.58
1 3 8 24.4 1.9
1 3 7 3.23 0.7
1 3 7 2.86 0.78
1 3 7 4.12 0.91
1 3 7 3.78 0.94
1 3 6 45.98 1.81
1 3 6 47.92 1.87
1 3 6 46.95 1.69
1 3 6 45.77 1.96
1 3 5 125.38 3.31
1 3 5 124.85 3.22
1 3 5 125.25 3.13
1 3 5 127.48 3.47
1 3 4 534.18 11.63
1 3 4 537.96 10.74
1 3 4 532.64 10.87
1 3 4 551.13 11.38
1 3 3 157.19 3.67
1 3 3 152.97 3.39
-1 -3 -2 8.57 0.49
-1 -3 -2 8.95 0.47
-1 -3 -2 8.59 0.65
1 3 2 7.44 0.48
1 3 2 8.36 0.62
1 3 2 9.25 0.49
-1 -3 -1 104.58 2.55
-1 -3 -1 102.25 2.27
-1 -3 -1 104.92 2.18
-1 -3 -1 111.89 2.32
-1 -3 -1 105.78 2.57
1 3 1 119.79 2.67
1 3 1 119.97 2.82
1 3 1 116.39 2.57
1 3 1 118.44 2.41
1 3 1 118.82 2.81
1 3 1 116.31 2.6
-1 -3 0 922.24 19.25
-1 -3 0 897.5 18.32
-1 -3 0 899.88 18.64
1 3 0 924.51 19.43
1 3 0 918.47 18.5
1 3 0 910.37 18.5
1 3 0 909.94 17.41
-1 -3 1 290.88 6.22
-1 -3 1 288.44 6.27
-1 -3 1 289.92 6.33
-1 -3 1 297 6.64
-1 -3 1 298.87 6.02
-1 -3 1 289.6 6.41
1 3 -1 290.48 6.23
1 3 -1 293.96 6.38
1 3 -1 290.13 6.3
1 3 -1 285.14 6.17
1 3 -1 291.04 5.95
-1 -3 2 23.6 1.08
-1 -3 2 21.21 1.03
-1 -3 2 21.14 0.97
-1 -3 2 23.89 0.95
-1 -3 2 21.1 1.06
-1 -3 2 20.83 1.01
1 3 -2 22.77 0.91
1 3 -2 20.24 0.88
1 3 -2 21.48 0.99
1 3 -2 22.72 1.07
1 3 -2 21.2 0.94
1 3 -2 20.31 0.94
-1 -3 3 8.03 0.79
-1 -3 3 8.15 0.73
-1 -3 3 8.25 0.82
-1 -3 3 8.19 0.85
-1 -3 3 8.27 0.71
-1 -3 3 7.57 0.75
1 3 -3 7.65 0.76
1 3 -3 5.63 0.65
1 3 -3 6.3 0.68
1 3 -3 7.21 0.84
-1 -3 4 45.65 1.71
-1 -3 4 45.78 1.77
-1 -3 4 41.56 1.82
-1 -3 4 44.82 1.66
-1 -3 4 44.49 1.56
-1 -3 4 43.88 1.54
1 3 -4 48.66 1.63
1 3 -4 47.43 1.94
1 3 -4 45.76 1.66
1 3 -4 49.04 1.59
-1 -3 5 93.79 2.94
-1 -3 5 95.01 2.84
-1 -3 5 93.11 2.65
-1 -3 5 96.86 3.16
-1 -3 5 97.45 2.68
-1 -3 5 94.93 2.81
1 3 -5 108.76 2.88
1 3 -5 102.56 2.74
1 3 -5 104.63 2.84
1 3 -5 106.15 3.37
-1 -3 6 27.77 1.74
-1 -3 6 20.92 1.43
-1 -3 6 24.48 1.33
-1 -3 6 25.04 1.47
-1 -3 6 20.76 1.51
-1 -3 6 21.68 1.48
-1 -3 6 27.65 1.4
1 3 -6 24.9 1.38
1 3 -6 22.37 1.3
1 3 -6 28.79 1.88
1 3 -6 23.12 1.37
-1 -3 7 24.8 1.97
-1 -3 7 28.09 1.72
-1 -3 7 28.61 1.75
-1 -3 7 26.51 1.52
-1 -3 7 26.39 1.66
-1 -3 7 26.07 1.47
-1 -3 7 28.21 1.76
1 3 -7 23.47 2.06
1 3 -7 26.25 1.55
1 3 -7 28.44 1.6
1 3 -7 28.2 1.37
-1 -3 8 29.97 2.02
-1 -3 8 29.81 1.74
-1 -3 8 30.89 1.97
-1 -3 8 30.49 1.95
-1 -3 8 28.81 1.78
-1 -3 8 30.82 1.96
-1 -3 8 31.73 2.33
1 3 -8 32.32 2.02
1 3 -8 29.83 1.53
1 3 -8 30.68 1.8
-1 -3 9 2.42 1.39
-1 -3 9 1.24 0.89
-1 -3 9 3.86 1.11
-1 -3 9 2.25 1.26
-1 -3 9 0.56 1.02
-1 -3 9 2.44 1.08
-1 -3 9 1.93 1.21
1 3 -9 1.18 0.82
1 3 -9 2.21 1.01
1 3 -9 2.11 1.05
-1 -3 10 4.49 1.38
-1 -3 10 7.2 1.33
-1 -3 10 5.81 1.44
-1 -3 10 8.41 1.57
-1 -3 10 6.34 1.48
-1 -3 10 6.57 1.84
-1 -3 10 5.91 1.64
1 3 -10 2.95 1.33
1 3 -10 5.09 1.17
1 3 -10 6.31 1.14
-1 -3 11 -1.55 2.11
-1 -3 11 2.55 1.85
-1 -3 11 2.79 1.51
-1 -3 11 0.89 1.43
-1 -3 11 -0.61 1.67
-1 -3 11 3.46 1.68
-1 -3 11 3.63 1.34
1 3 -11 0.69 1.16
1 3 -11 1.4 1.78
-1 -3 12 9.39 3.22
-1 -3 12 5.67 2.28
-1 -3 12 9.74 2.36
-1 -3 12 9.05 1.91
-1 -3 12 5.05 2.35
0 4 11 6.18 2.18
0 4 11 6.86 1.61
0 4 11 6.65 1.86
0 4 11 7.39 1.53
0 4 10 0.25 1.17
0 4 10 2.22 1.35
0 4 10 4.42 1.25
0 4 10 3.52 1.65
0 4 9 19.1 1.68
0 4 9 21.38 1.95
0 4 9 18.72 2.06
0 4 9 20.74 1.66
0 4 8 12.34 1.49
0 4 8 11.15 1.31
0 4 8 11.74 1.29
0 4 8 12.5 1.48
0 4 7 54.45 2.09
0 4 7 55.77 2.4
0 4 7 51.68 2.13
0 4 7 53.78 2.05
0 4 6 63.81 2.16
0 4 6 64.32 2.16
0 4 6 62.9 2.13
0 4 6 64.22 2.35
0 4 5 72.75 2.36
0 4 5 71.52 2.13
0 4 5 77.25 2.24
0 4 5 71.25 2.23
0 4 4 34.94 1.37
0 4 4 34.26 1.24
0 -4 -3 66.2 1.97
0 4 3 87.54 2.05
0 4 3 86.89 2.37
0 4 3 88.92 1.98
0 4 3 87.47 1.9
0 -4 -2 339.81 7.39
0 -4 -2 348.67 7.54
0 4 2 339.38 7.01
0 4 2 342.26 6.77
0 4 2 333.19 7.06
0 4 2 349.88 7.35
0 4 2 341.86 6.67
0 -4 -1 106.56 2.44
0 -4 -1 99.57 2.48
0 -4 -1 108.71 2.71
0 -4 -1 113.36 2.86
0 -4 -1 112 2.78
0 4 1 101.97 2.48
0 4 1 106.31 2.57
0 4 1 105.46 2.58
0 4 1 105.09 2.65
0 4 1 104.7 2.39
0 4 1 107.17 2.51
0 -4 0 132.74 3.21
0 -4 0 134.98 3.36
0 -4 0 137.1 3.2
0 -4 0 132.46 3.17
0 -4 0 124.64 3.05
0 4 0 131.87 3.21
0 4 0 140.02 3.21
0 4 0 142.44 3.37
0 4 0 139.89 3.09
0 4 0 137.62 3.33
0 4 0 139.14 3.31
0 -4 1 112.47 3.02
0 -4 1 110.06 2.88
0 -4 1 111.14 2.77
0 -4 1 108.95 2.88
0 -4 1 110.92 2.84
0 4 -1 107.13 2.58
0 4 -1 106.59 2.75
0 4 -1 105.18 2.82
0 4 -1 109.94 2.73
0 4 -1 105.73 2.8
0 4 -1 105.22 2.67
0 -4 2 327.72 7.25
0 -4 2 328.33 7.51
0 -4 2 329.85 7.34
0 -4 2 323.19 7.16
0 -4 2 340.81 7.69
0 4 -2 349.53 7.47
0 4 -2 334.58 7.69
0 4 -2 334.34 7.34
0 4 -2 339.38 7.17
0 4 -2 342.4 7
0 4 -2 339.81 7.14
0 -4 3 61.86 2.07
0 -4 3 66.13 2.16
0 -4 3 66.44 2.02
0 -4 3 68.3 2.27
0 -4 3 63.9 2.21
0 4 -3 84.32 2.32
0 4 -3 84.9 2.47
0 4 -3 88.55 2.71
0 4 -3 84.93 2.37
0 -4 4 44.75 1.77
0 -4 4 43.99 1.93
0 -4 4 44.88 1.79
0 -4 4 43.99 1.87
0 -4 4 43.73 1.65
0 4 -4 38.78 1.52
0 4 -4 39.03 1.47
0 4 -4 38.14 1.84
0 4 -4 37.44 1.62
0 -4 5 80.48 2.88
0 -4 5 74.97 2.7
0 -4 5 79.07 2.45
0 -4 5 75.71 2.57
0 -4 5 79.26 2.64
0 -4 5 77.98 2.38
0 -4 5 74.02 2.76
0 4 -5 79.18 2.39
0 4 -5 77.9 2.36
0 4 -5 77.88 2.88
0 4 -5 75.12 2.47
0 -4 6 67.28 2.63
0 -4 6 60.59 2.38
0 -4 6 59.88 2.67
0 -4 6 62.84 2.18
0 -4 6 57.92 2.19
0 -4 6 58.43 2.38
0 -4 6 62.37 2.51
0 4 -6 60.85 2.71
0 4 -6 60.19 2.25
0 4 -6 59.81 2.15
0 4 -6 60.22 2.09
0 -4 7 45.57 1.94
0 -4 7 47.5 2.52
0 -4 7 43.49 2.29
0 -4 7 46.28 2.05
0 -4 7 43.81 2.18
0 -4 7 44.08 2.3
0 4 -7 49.61 2.77
0 4 -7 50.46 2.09
0 -4 8 12.08 1.63
0 -4 8 11.53 1.52
0 -4 8 13.09 1.83
0 -4 8 10.68 1.38
0 -4 8 10.01 1.6
0 -4 8 12.14 1.4
0 -4 8 11.27 1.57
0 4 -8 11.9 1.25
0 4 -8 12.03 1.52
0 -4 9 18.95 2.29
0 -4 9 18.98 2.07
0 -4 9 22.94 2.7
0 -4 9 21.43 2.31
0 -4 9 19.64 2.08
0 -4 9 19.52 2.16
0 -4 9 23.88 1.85
0 4 -9 20.07 2
0 4 -9 17.9 1.61
0 4 -9 20.56 1.89
0 -4 10 4.44 1.91
0 -4 10 1.74 1.36
0 -4 10 0.08 1.43
0 -4 10 2.32 1.46
0 -4 10 0.78 1.59
0 -4 10 2.8 1.53
0 4 -10 1.96 1.38
0 4 -10 1.74 1.15
0 4 -10 2.93 1.43
0 -4 11 2.45 2.12
0 -4 11 4.12 1.9
0 -4 11 5.22 1.83
0 -4 11 5.74 2.38
0 -4 11 8.01 1.97
0 -4 11 5.44 2.37
0 4 -11 5.02 1.92
-1 5 11 -0.1 1.46
-1 5 11 3.36 1.68
-1 5 11 0.88 1.95
-1 5 11 3.59 1.62
-1 5 10 9.81 1.5
-1 5 10 9.62 1.46
-1 5 10 9.77 1.68
-1 5 10 8.03 1.83
-1 5 9 2.12 1.18
-1 5 9 0.73 0.85
-1 5 9 -0.16 0.97
-1 5 9 3.13 1.13
-1 5 8 13.38 1.49
-1 5 8 10.75 1.41
-1 5 8 16.25 1.71
-1 5 8 13.1 1.38
-1 5 7 46.69 1.97
-1 5 7 48.05 1.96
-1 5 7 48.12 2.2
-1 5 7 44.72 1.97
-1 5 6 10.38 1.14
-1 5 6 10.03 1.13
-1 5 6 10.05 1.02
-1 5 6 9.62 0.99
-1 5 5 42.57 1.63
-1 5 5 42.4 1.47
-1 5 4 11.42 0.71
-1 5 4 9.99 0.51
-1 5 4 8.84 0.81
1 -5 -3 361.48 7.86
1 -5 -3 354.88 7.92
1 -5 -3 364.6 7.91
-1 5 3 358.85 7.06
-1 5 3 354.31 7.27
-1 5 3 350.33 6.92
-1 5 3 349.43 7.68
-1 5 3 349.09 7.34
-1 5 3 348.58 6.85
1 -5 -2 76.43 2.16
1 -5 -2 76.89 2.19
1 -5 -2 74.88 2.2
-1 5 2 77.78 2.06
-1 5 2 73.55 1.93
-1 5 2 75.62 2.17
-1 5 2 75.75 1.89
1 -5 -1 77.66 2.01
1 -5 -1 74.12 2.29
1 -5 -1 72.42 1.91
1 -5 -1 77.29 2.19
1 -5 -1 77.19 2.24
-1 5 1 70.8 2.06
-1 5 1 74 2.11
-1 5 1 70.56 1.96
-1 5 1 74.15 2.12
-1 5 1 74.63 1.9
1 -5 0 148.34 3.91
1 -5 0 142.5 3.57
1 -5 0 144.56 3.61
1 -5 0 142.93 3.59
1 -5 0 152.42 3.83
1 -5 0 147.03 3.48
-1 5 0 145.05 3.53
-1 5 0 151.68 3.73
-1 5 0 148.66 3.39
-1 5 0 144.32 3.66
-1 5 0 148.94 3.56
-1 5 0 149.48 3.65
1 -5 1 198.54 4.77
1 -5 1 201.76 4.74
1 -5 1 206.33 5.02
1 -5 1 195.93 4.62
1 -5 1 191.98 4.78
1 -5 1 198.53 5.11
-1 5 -1 203.17 4.8
-1 5 -1 202.92 4.9
-1 5 -1 204.79 4.92
-1 5 -1 203.91 4.49
-1 5 -1 196.37 4.69
-1 5 -1 205.95 4.69
1 -5 2 586.74 12.62
1 -5 2 590.19 12.53
1 -5 2 593.71 12.91
1 -5 2 592.85 13.21
1 -5 2 598.71 13.38
1 -5 2 575.38 12.41
-1 5 -2 575.69 12.34
-1 5 -2 575.98 11.49
-1 5 -2 572.42 11.78
-1 5 -2 578.43 12.26
-1 5 -2 572.69 12.62
1 -5 3 86.3 2.88
1 -5 3 95.22 2.85
1 -5 3 92.1 2.65
1 -5 3 95.32 2.95
1 -5 3 88.8 3.01
1 -5 3 85.9 2.72
-1 5 -3 86.43 2.66
-1 5 -3 90.32 2.88
-1 5 -3 86.86 2.52
-1 5 -3 86.07 2.47
1 -5 4 82.65 2.83
1 -5 4 79.48 2.52
1 -5 4 78.91 2.88
1 -5 4 81 2.73
1 -5 4 86.09 2.71
1 -5 4 80.37 2.83
-1 5 -4 86.14 2.52
-1 5 -4 88.03 2.75
-1 5 -4 84.46 2.55
-1 5 -4 89.33 3.04
1 -5 5 60.89 2.55
1 -5 5 58.69 2.52
1 -5 5 60.55 2.36
1 -5 5 57.02 2.46
1 -5 5 59.54 2.37
1 -5 5 60.71 2.21
-1 5 -5 62.71 2.39
-1 5 -5 66.26 2.74
-1 5 -5 65.3 2.21
-1 5 -5 61.12 2.13
1 -5 6 35.87 1.98
1 -5 6 34.64 1.84
1 -5 6 34.34 2.09
1 -5 6 36.47 2.16
1 -5 6 33.41 2.09
1 -5 6 35.81 2.01
-1 5 -6 39.41 1.84
-1 5 -6 40.98 1.81
-1 5 -6 38.15 2.01
1 -5 7 126.58 4.42
1 -5 7 138.26 4.28
1 -5 7 134.06 4.41
1 -5 7 138.84 4.28
1 -5 7 135.27 4.03
1 -5 7 141.77 4.7
-1 5 -7 132.51 3.73
-1 5 -7 131.07 3.65
1 -5 8 10.26 1.62
1 -5 8 10.43 1.58
1 -5 8 11.91 1.42
1 -5 8 11.83 1.73
1 -5 8 11.02 1.53
1 -5 8 11.4 1.89
-1 5 -8 11.15 1.39
1 -5 9 3.24 1.59
1 -5 9 3.32 1.35
1 -5 9 4.21 1.66
1 -5 9 5.55 1.53
1 -5 9 5.57 1.57
1 -5 9 7.14 1.51
-1 5 -9 2.72 1.38
-1 5 -9 4.93 1.85
-1 5 -9 4.62 1.32
-1 5 -9 4.84 1.13
1 -5 10 -0.32 1.56
1 -5 10 3.69 1.96
1 -5 10 1.68 1.73
1 -5 10 -0.08 1.73
1 -5 10 -0.14 1.6
1 -5 10 0.33 1.58
-1 5 -10 0.81 1.51
-1 5 -10 2.19 1.33
1 -5 11 4.76 2.26
1 -5 11 7.52 2.02
1 -5 11 10.03 2.78
1 -5 11 4.13 2.04
1 -5 11 6.86 2.52
-2 6 11 2.11 1.76
-2 6 11 1.68 1.81
-2 6 11 1.59 1.47
-2 6 11 0.41 1.93
-2 6 10 1.12 1.6
-2 6 10 4.43 1.23
-2 6 10 1.47 1.35
-2 6 10 3.53 1.43
-2 6 9 2.99 1.12
-2 6 9 4.7 1.21
-2 6 9 3.64 1.03
-2 6 9 5.97 1.42
-2 6 8 47.06 2.28
-2 6 8 49.57 2.13
-2 6 8 47.12 2.09
-2 6 8 49.67 2.47
-2 6 7 20.1 1.44
-2 6 7 17.07 1.57
-2 6 7 21.99 1.38
-2 6 7 19.88 1.57
-2 6 6 17.54 1.35
-2 6 6 16.77 1.09
-2 6 6 15.96 1.16
-2 6 5 12.32 0.99
-2 6 5 14.17 0.88
2 -6 -4 25.04 1.03
2 -6 -4 26.12 1.32
2 -6 -4 24.23 1.01
-2 6 4 26.22 1.1
-2 6 4 26.06 1.26
-2 6 4 26.16 0.94
-2 6 4 24 1.05
-2 6 4 25.88 0.95
-2 6 4 24.7 0.89
2 -6 -3 28.77 1.32
2 -6 -3 29.74 1.24
-2 6 3 28.25 1.02
-2 6 3 27.27 1.06
-2 6 3 28.11 1.29
-2 6 3 27.57 1.17
2 -6 -2 19.47 0.75
2 -6 -2 20.97 0.72
2 -6 -2 21.23 1.13
2 -6 -2 20.74 1.15
-2 6 2 23.91 1.17
-2 6 2 22.57 1.19
-2 6 2 22.82 1
-2 6 2 22.22 1.14
-2 6 2 21.55 0.96
2 -6 -1 278.51 6.81
2 -6 -1 285.86 6.26
2 -6 -1 281.23 6.44
2 -6 -1 285.64 6.16
2 -6 -1 286.92 6.74
-2 6 1 301.76 6.3
-2 6 1 296.62 6.63
-2 6 1 308.19 6.84
-2 6 1 297.46 6.88
-2 6 1 303.41 6.81
2 -6 0 158.85 4.22
2 -6 0 155.39 3.83
2 -6 0 158.89 4.01
2 -6 0 156 3.99
2 -6 0 160.88 3.96
2 -6 0 159.83 4.33
-2 6 0 151.76 3.83
-2 6 0 158.31 4.03
-2 6 0 157.84 3.69
-2 6 0 155.72 3.96
-2 6 0 158.82 4.07
2 -6 1 76.54 2.42
2 -6 1 74.15 2.62
2 -6 1 77.2 2.31
2 -6 1 76.19 2.4
2 -6 1 73.57 2.53
2 -6 1 76.68 2.41
-2 6 -1 83.17 2.6
-2 6 -1 83.13 2.41
-2 6 -1 81.65 2.5
-2 6 -1 81.18 2.56
-2 6 -1 79.4 2.31
-2 6 -1 82.06 2.65
2 -6 2 23.27 1.46
2 -6 2 23.13 1.35
2 -6 2 24.97 1.29
2 -6 2 25.16 1.38
2 -6 2 20.94 1.32
-2 6 -2 24.26 1.43
-2 6 -2 22.69 1.17
-2 6 -2 22.82 1.43
-2 6 -2 22.56 1.44
2 -6 3 155.43 4.37
2 -6 3 153.13 4.04
2 -6 3 158.24 4.45
2 -6 3 156.53 4.19
2 -6 3 152.22 4.24
2 -6 3 150.91 4.54
-2 6 -3 155.18 4.4
-2 6 -3 156.74 3.88
-2 6 -3 154.08 4.13
-2 6 -3 152.09 3.96
-2 6 -3 154.14 4.25
2 -6 4 193.67 5.06
2 -6 4 204.77 5.36
2 -6 4 207.52 5.29
2 -6 4 203.01 5.69
2 -6 4 203.48 5.53
2 -6 4 197.88 5.51
-2 6 -4 195.75 5.49
-2 6 -4 202.86 4.82
-2 6 -4 193.9 4.84
-2 6 -4 202.86 5.08
2 -6 5 18.5 1.55
2 -6 5 19.23 1.65
2 -6 5 17.51 1.61
2 -6 5 18.51 1.64
2 -6 5 14.71 1.42
2 -6 5 20.64 1.7
-2 6 -5 15.46 1.59
-2 6 -5 20.93 1.5
-2 6 -5 17.93 1.28
-2 6 -5 22.59 1.94
2 -6 6 14.6 1.78
2 -6 6 9.04 1.32
2 -6 6 10.07 1.21
2 -6 6 9.18 1.34
2 -6 6 9.33 1.36
2 -6 6 11.95 1.51
-2 6 -6 10.51 1.29
-2 6 -6 8.85 1.14
-2 6 -6 9.2 1.33
2 -6 7 32.63 2.52
2 -6 7 31.81 2.14
2 -6 7 33.59 2.43
2 -6 7 35.76 2.52
2 -6 7 32.57 2.09
2 -6 7 33.55 2.33
-2 6 -7 33.87 1.85
-2 6 -7 36.08 2.02
2 -6 8 51.66 3.06
2 -6 8 49.41 3.17
2 -6 8 48.79 2.69
2 -6 8 48.47 3.1
2 -6 8 48.64 2.83
2 -6 8 44.97 2.89
-2 6 -8 48.45 2.34
-2 6 -8 47.93 2.44
2 -6 9 18.43 2.42
2 -6 9 23.23 2.57
2 -6 9 20.1 2.46
2 -6 9 19.54 2.58
2 -6 9 17.04 2.22
2 -6 9 19.6 2.68
-2 6 -9 18.81 2.72
-2 6 -9 18.76 1.92
-2 6 -9 17.05 2.02
-2 6 -9 16 1.84
2 -6 10 2.57 1.79
2 -6 10 5.46 2.13
2 -6 10 3.29 1.89
2 -6 10 0.71 1.79
2 -6 10 0.57 2
2 -6 10 1 1.78
2 -6 10 0.89 1.84
-2 6 -10 5 1.78
-2 6 -10 3.55 1.58
2 -6 11 -0.56 2.19
2 -6 11 2.47 2.21
2 -6 11 4.09 2.82
2 -6 11 7.32 2.19
-3 7 11 5.72 1.51
-3 7 11 7.88 1.95
-3 7 11 6.66 2.24
-3 7 11 4.11 1.88
-3 7 10 7.17 1.48
-3 7 10 5.43 1.66
-3 7 10 7.95 1.89
-3 7 10 9.09 1.44
-3 7 9 5.34 1.15
-3 7 9 7.75 1.46
-3 7 9 8.9 1.26
-3 7 9 10.87 1.65
-3 7 8 4.86 0.98
-3 7 8 4.6 0.96
-3 7 8 5.74 1.32
-3 7 8 5.26 1.24
-3 7 7 22.61 1.49
-3 7 7 21.7 1.32
-3 7 7 20.39 1.7
-3 7 6 48.17 1.58
-3 7 6 48.23 1.96
-3 7 6 47.09 2.17
-3 7 5 7.73 0.96
-3 7 5 9.26 1.06
-3 7 5 7.9 0.74
-3 7 5 9.93 0.9
-3 7 5 8.3 0.71
3 -7 -4 36.92 1.67
3 -7 -4 37.38 1.47
3 -7 -4 36.91 1.47
-3 7 4 33.22 1.25
-3 7 4 36.07 1.25
-3 7 4 34.25 1.44
-3 7 4 32.72 1.49
-3 7 4 32.63 1.41
3 -7 -3 92.58 2.79
3 -7 -3 92.58 2.77
3 -7 -3 94.83 2.76
-3 7 3 97.14 2.8
-3 7 3 96.61 2.47
-3 7 3 95.27 2.75
-3 7 3 94.54 2.54
3 -7 -2 35.65 1.16
3 -7 -2 36.72 1.63
3 -7 -2 35.41 1.61
3 -7 -2 35.8 1.22
3 -7 -2 37.77 1.62
-3 7 2 34.19 1.34
-3 7 2 33.38 1.57
-3 7 2 32.41 1.47
-3 7 2 34.01 1.56
-3 7 2 34.06 1.31
3 -7 -1 57.35 1.84
3 -7 -1 54.99 2.08
3 -7 -1 55.75 2.03
3 -7 -1 55.02 1.76
3 -7 -1 53.99 2.13
-3 7 1 63.08 1.93
-3 7 1 56.07 2.03
-3 7 1 61.7 2.16
-3 7 1 62.01 1.97
-3 7 1 60.94 2.2
3 -7 0 8.5 0.89
3 -7 0 9.79 0.92
3 -7 0 8.96 1.04
3 -7 0 8.96 1.08
3 -7 0 9.85 1.07
3 -7 0 9.58 0.94
-3 7 0 9.09 0.96
-3 7 0 8.31 1.06
-3 7 0 9.61 0.83
-3 7 0 8.06 0.85
-3 7 0 8.94 1.17
3 -7 1 152.61 3.97
3 -7 1 156.44 4.48
3 -7 1 151.5 4.16
3 -7 1 148.95 4.09
3 -7 1 156.02 4.14
3 -7 1 151.37 4.34
-3 7 -1 150.96 4.22
-3 7 -1 151.01 4.06
-3 7 -1 151.6 4.08
-3 7 -1 151.94 4.21
-3 7 -1 151.03 3.79
3 -7 2 55.64 2.2
3 -7 2 55.67 2.41
3 -7 2 52.56 2.17
3 -7 2 55.75 2.34
3 -7 2 55.63 2.2
3 -7 2 57.68 2.12
-3 7 -2 56.01 2.34
-3 7 -2 57.29 2.33
-3 7 -2 54.71 2.27
-3 7 -2 55.97 1.97
3 -7 3 99.34 3.39
3 -7 3 100.38 3.5
3 -7 3 96.54 3.29
3 -7 3 96.1 3.16
3 -7 3 98.57 3.24
3 -7 3 97.36 3.05
-3 7 -3 100.73 2.96
-3 7 -3 100.85 3.45
-3 7 -3 96.95 3.05
-3 7 -3 102.56 3.28
-3 7 -3 102.66 3.39
3 -7 4 17.86 1.72
3 -7 4 20.59 1.61
3 -7 4 21.41 1.62
3 -7 4 19.96 1.53
3 -7 4 21.1 1.69
3 -7 4 21.26 1.71
-3 7 -4 21.01 1.33
-3 7 -4 21.4 1.74
-3 7 -4 20.1 1.51
-3 7 -4 15.98 1.75
3 -7 5 56.51 2.77
3 -7 5 58.54 2.63
3 -7 5 54.75 2.69
3 -7 5 60.25 2.7
3 -7 5 59.54 2.84
3 -7 5 54.62 2.43
-3 7 -5 62.26 2.41
-3 7 -5 57.68 2.24
-3 7 -5 57.98 2.93
-3 7 -5 55.76 2.65
3 -7 6 51.85 2.82
3 -7 6 49.4 2.65
3 -7 6 48.7 2.58
3 -7 6 53.22 2.47
3 -7 6 47.85 2.8
3 -7 6 47.68 2.82
-3 7 -6 46.46 2.64
-3 7 -6 42.82 2.02
-3 7 -6 46.6 2.27
3 -7 7 20.3 2.06
3 -7 7 22.34 2.38
3 -7 7 19.21 2.29
3 -7 7 18.33 2.17
3 -7 7 24.11 2.41
3 -7 7 18.99 2.33
-3 7 -7 22.38 2.32
-3 7 -7 23.97 1.77
-3 7 -7 16.57 1.89
3 -7 8 20.68 2.34
3 -7 8 18.93 2.37
3 -7 8 23.2 2.51
3 -7 8 20.88 2.8
3 -7 8 20.64 2.69
3 -7 8 23.77 2.75
-3 7 -8 22.09 2.23
-3 7 -8 24.21 2.01
-3 7 -8 17.75 1.99
3 -7 9 18.43 2.32
3 -7 9 15.8 2.21
3 -7 9 15.52 2.4
3 -7 9 18.18 2.48
3 -7 9 16.63 2.38
3 -7 9 16.56 2.32
-3 7 -9 18.1 1.99
-3 7 -9 18.75 1.96
3 -7 10 1.29 2.08
3 -7 10 8.46 2.53
3 -7 10 5.93 2.03
3 -7 10 3.66 1.95
3 -7 10 5.49 2.05
-3 7 -10 5.36 1.97
-4 8 11 7.44 2.16
-4 8 11 14.55 2.63
-4 8 10 4.22 1.74
-4 8 10 3.58 1.32
-4 8 10 5.49 1.36
-4 8 10 5 1.89
-4 8 9 3.75 1.64
-4 8 9 3.36 1.15
-4 8 9 6.52 1.55
-4 8 9 3.07 1.21
-4 8 8 8.9 1.48
-4 8 8 5.27 0.87
-4 8 8 4.75 1.04
-4 8 8 6.08 1.39
-4 8 7 36.62 1.71
-4 8 7 39.79 2.28
-4 8 7 36.12 1.87
-4 8 7 35.63 1.46
-4 8 6 66.16 2.39
-4 8 6 66.32 1.95
-4 8 6 63.21 2.22
-4 8 6 64.87 1.96
-4 8 6 66.59 1.8
4 -8 -5 24.43 1.22
4 -8 -5 25.13 1.62
4 -8 -5 22.79 1.25
-4 8 5 21.97 1.34
-4 8 5 23.01 1.18
-4 8 5 25.62 1.5
-4 8 5 25.66 1.11
-4 8 5 23.28 1.45
4 -8 -4 13.47 1.24
4 -8 -4 14.79 1.3
-4 8 4 15.6 1.05
-4 8 4 16.15 1.2
-4 8 4 17.35 1.01
-4 8 4 16.58 1.37
-4 8 4 17.12 1.32
4 -8 -3 28.11 1.55
4 -8 -3 25.05 1.53
4 -8 -3 27.09 1.54
-4 8 3 26.96 1.26
-4 8 3 27.09 1.26
-4 8 3 25.98 1.62
-4 8 3 25.74 1.59
-4 8 3 28.69 1.48
4 -8 -2 98.98 3.17
4 -8 -2 103.77 3.23
4 -8 -2 98.53 2.6
4 -8 -2 103.26 3.07
4 -8 -2 96.63 2.53
-4 8 2 97.99 3.09
-4 8 2 97.27 3.09
-4 8 2 102.86 3.01
-4 8 2 94.56 2.79
-4 8 2 99.98 2.71
4 -8 -1 63.79 2.42
4 -8 -1 63.61 2.34
4 -8 -1 62.78 2.07
4 -8 -1 61.62 2.42
4 -8 -1 61.42 2.01
-4 8 1 63.8 2.32
-4 8 1 67.59 2.52
-4 8 1 63.71 2.41
-4 8 1 67.2 2.12
4 -8 0 16.89 1.37
4 -8 0 15.61 1.39
4 -8 0 15.47 1.18
4 -8 0 15.8 1.14
4 -8 0 14.28 1.32
-4 8 0 17.61 1.44
-4 8 0 19.64 1.31
-4 8 0 16.51 1.54
-4 8 0 17.65 1.12
4 -8 1 39.66 1.98
4 -8 1 40.47 2.05
4 -8 1 41.17 1.86
4 -8 1 42.57 1.91
4 -8 1 38.69 2.12
4 -8 1 42.68 1.85
-4 8 -1 42.23 2.12
-4 8 -1 45.2 1.98
-4 8 -1 46.38 2.14
-4 8 -1 43.39 2.18
-4 8 -1 43.73 1.77
4 -8 2 3.1 0.81
4 -8 2 3.11 0.98
4 -8 2 3.64 1.01
4 -8 2 3.14 0.78
4 -8 2 3.54 0.95
4 -8 2 3.66 0.82
-4 8 -2 2.78 0.59
-4 8 -2 3.8 1.05
-4 8 -2 3.92 1.06
-4 8 -2 3.61 0.96
4 -8 3 42.73 2.36
4 -8 3 47.18 2.29
4 -8 3 47.94 2.17
4 -8 3 47.85 2.26
4 -8 3 47.5 2.25
4 -8 3 45.46 2.47
-4 8 -3 48.71 1.97
-4 8 -3 46.99 2.24
-4 8 -3 51.5 2.55
-4 8 -3 46.86 2.39
-4 8 -3 51.31 2.52
4 -8 4 3 0.98
4 -8 4 4.5 0.99
4 -8 4 3.06 0.83
4 -8 4 2.99 1.05
4 -8 4 4.75 1.32
4 -8 4 2.9 0.99
-4 8 -4 4.85 1.2
-4 8 -4 3.91 1.23
-4 8 -4 2.96 0.79
-4 8 -4 4.14 1.09
4 -8 5 42.13 2.34
4 -8 5 46.64 2.61
4 -8 5 44.92 2.67
4 -8 5 48.28 2.78
4 -8 5 45.37 2.49
4 -8 5 47.74 2.65
-4 8 -5 47.92 2.92
-4 8 -5 49.04 2.38
-4 8 -5 48.24 2.12
-4 8 -5 46.79 2.64
4 -8 6 18.36 2.46
4 -8 6 23 2.07
4 -8 6 22.96 2.22
4 -8 6 23.99 2.34
4 -8 6 18.24 2.24
4 -8 6 16.6 2.33
-4 8 -6 22.85 2
-4 8 -6 23.24 2.46
-4 8 -6 25.44 1.72
4 -8 7 3.27 1.49
4 -8 7 4.97 1.75
4 -8 7 5.04 1.44
4 -8 7 4.25 1.65
4 -8 7 5.13 1.71
4 -8 7 6.51 1.53
-4 8 -7 2.8 1.48
-4 8 -7 4.8 1.19
-4 8 -7 4.58 1.4
-4 8 -7 -2.26 1.6
4 -8 8 2.69 1.79
4 -8 8 3.31 1.84
4 -8 8 -1.02 1.7
4 -8 8 -0.03 1.73
4 -8 8 1.22 1.6
4 -8 8 1.16 1.54
-4 8 -8 2.6 1.28
-4 8 -8 1.89 2.12
-4 8 -8 1.18 1.76
-4 8 -8 3.57 1.52
4 -8 9 14.96 2.19
4 -8 9 11.75 2.25
4 -8 9 14.82 2.33
4 -8 9 14.38 2.83
4 -8 9 14.76 2.47
-4 8 -9 14.27 2.15
-4 8 -9 15.13 2.04
4 -8 10 17.92 3.16
4 -8 10 23.48 3.03
4 -8 10 10.96 2.94
4 -8 10 16.92 2.65
-5 9 10 10.61 2.25
-5 9 10 7.87 1.42
-5 9 10 6.31 1.85
-5 9 9 17.27 1.68
-5 9 9 18.46 2.63
-5 9 9 21.21 2.68
-5 9 8 1.37 1
-5 9 8 4.07 1.19
-5 9 8 2.4 1.41
-5 9 7 11.81 1.62
-5 9 7 10.22 1.27
-5 9 7 9.19 1.23
-5 9 6 10.89 1.3
-5 9 6 10 0.99
-5 9 6 9.75 1.22
-5 9 6 12.84 1.45
5 -9 -5 102.3 2.96
5 -9 -5 91.16 2.85
5 -9 -5 94.78 3.18
-5 9 5 104.29 3.28
-5 9 5 103.45 2.75
-5 9 5 100.77 3.02
-5 9 5 100.44 3.18
5 -9 -4 89.46 2.96
5 -9 -4 92.08 2.97
5 -9 -4 86.84 2.98
-5 9 4 82.22 2.9
-5 9 4 84.07 2.79
-5 9 4 86.09 2.47
-5 9 4 84.59 2.82
-5 9 4 81.61 3.07
5 -9 -3 29.78 1.79
5 -9 -3 30.36 1.75
5 -9 -3 32.1 1.82
-5 9 3 30.41 1.42
-5 9 3 28.05 1.61
-5 9 3 30.98 1.92
-5 9 3 27.48 1.86
5 -9 -2 15.92 1.55
5 -9 -2 17.08 1.45
5 -9 -2 16.93 1.51
5 -9 -2 15.56 1.04
5 -9 -2 15.92 1.02
-5 9 2 15.77 1.61
-5 9 2 17.39 1.6
-5 9 2 16.54 1.16
-5 9 2 16.98 1.38
5 -9 -1 37.86 2.06
5 -9 -1 35.64 1.64
5 -9 -1 35.22 1.62
5 -9 -1 37.3 1.99
5 -9 -1 35.04 1.97
-5 9 1 38.26 2.05
-5 9 1 38.95 1.69
-5 9 1 38.89 1.88
-5 9 1 37.09 2.18
5 -9 0 151.37 4.64
5 -9 0 149.99 4.08
5 -9 0 151.9 4.36
5 -9 0 154.57 4.22
5 -9 0 148.15 3.33
5 -9 0 153.14 4.62
-5 9 0 141.99 4.28
-5 9 0 143.05 3.79
-5 9 0 144.31 4.13
-5 9 0 136.37 4.14
5 -9 1 74.95 2.17
5 -9 1 77.2 2.77
5 -9 1 76.55 2.81
5 -9 1 76.15 2.7
5 -9 1 77.21 2.92
5 -9 1 75.05 3.1
5 -9 1 76.27 3.09
-5 9 -1 80.83 2.9
-5 9 -1 76.55 2.58
-5 9 -1 79.02 3.06
-5 9 -1 76.38 3.05
-5 9 -1 76.99 3.13
5 -9 2 8.63 1.18
5 -9 2 14.32 1.66
5 -9 2 12.74 1.43
5 -9 2 13.15 1.66
5 -9 2 12.9 1.85
5 -9 2 11.89 1.39
-5 9 -2 8.63 1.34
-5 9 -2 12.02 1.57
-5 9 -2 13.08 1.17
-5 9 -2 9.17 1.27
5 -9 3 12.92 1.76
5 -9 3 13.71 1.59
5 -9 3 15.53 1.68
5 -9 3 15.08 2.01
5 -9 3 16.3 1.64
-5 9 -3 15.52 2
-5 9 -3 14.15 1.77
-5 9 -3 16.2 2.04
-5 9 -3 12.43 1.53
-5 9 -3 15.46 1.33
5 -9 4 9.39 1.59
5 -9 4 11.57 1.62
5 -9 4 12.39 1.67
5 -9 4 8.84 1.39
-5 9 -4 10.39 1.44
-5 9 -4 10.92 1.39
-5 9 -4 10.97 1.68
-5 9 -4 11.35 1.69
5 -9 5 33.08 2.56
5 -9 5 32.37 2.74
5 -9 5 31.49 2.7
5 -9 5 37.51 2.55
-5 9 -5 30.46 2.29
-5 9 -5 36.42 2.03
-5 9 -5 36.03 2.74
-5 9 -5 35.25 2.9
5 -9 6 1.96 1.3
5 -9 6 1.28 1.44
5 -9 6 -0.07 1.45
5 -9 6 1.74 1.4
5 -9 6 -0.93 1.31
5 -9 6 1.51 1.58
-5 9 -6 2.12 1.68
-5 9 -6 -0.49 1.49
-5 9 -6 0.33 0.96
-5 9 -6 2.09 1.3
5 -9 7 35.55 3
5 -9 7 34.11 2.89
5 -9 7 39.96 2.78
5 -9 7 35.12 3.19
5 -9 7 32.01 3.36
5 -9 7 31.1 3.14
5 -9 7 26.78 3.03
-5 9 -7 37.37 2.36
-5 9 -7 34.4 3.62
-5 9 -7 37.52 2.73
-5 9 -7 26.82 3.12
5 -9 8 10.31 2.18
5 -9 8 15.13 2.41
5 -9 8 12.07 2.46
5 -9 8 13.72 2.2
5 -9 8 11.06 2.03
-5 9 -8 13.27 1.91
-5 9 -8 14.55 2.15
5 -9 9 -1.13 2.18
5 -9 9 -1.37 2.7
5 -9 9 -1.67 2.02
5 -9 9 -3.2 1.96
5 -9 9 1.24 2.4
5 -9 10 4.15 2.91
5 -9 10 0.26 2.68
-6 10 10 6.64 2.39
-6 10 10 9.25 2.26
-6 10 9 10.18 1.47
-6 10 9 12.26 1.59
-6 10 9 10.47 2.15
-6 10 9 9.6 1.96
-6 10 8 4.96 1.73
-6 10 8 9.03 1.33
-6 10 8 9.04 1.64
-6 10 7 20.71 2.4
-6 10 7 18.2 1.43
-6 10 7 18.67 1.29
-6 10 7 18.78 1.73
-6 10 7 17.99 2.21
-6 10 6 19.82 1.64
-6 10 6 18.19 1.3
-6 10 6 18.81 1.56
-6 10 6 16.96 2.06
6 -10 -5 46.15 2.12
6 -10 -5 49.7 2.23
6 -10 -5 47.62 2.35
-6 10 5 51.24 2.22
-6 10 5 52.73 2.78
-6 10 5 46.12 2.25
-6 10 5 48.68 2.52
-6 10 5 46.1 1.94
6 -10 -4 31.95 1.94
6 -10 -4 28.24 1.97
6 -10 -4 33.25 2.02
-6 10 4 33.07 1.68
-6 10 4 32.86 1.9
-6 10 4 33.58 2.32
-6 10 4 35.67 2.17
-6 10 4 33.38 2.25
6 -10 -3 57.59 2.61
6 -10 -3 55.44 2.51
6 -10 -3 57.11 2.53
-6 10 3 63.92 2.83
-6 10 3 61.4 2.63
-6 10 3 62.17 2.24
-6 10 3 60.53 2.78
-6 10 3 62.42 2.49
6 -10 -2 52.72 1.89
6 -10 -2 52.85 1.89
6 -10 -2 51.26 2.43
6 -10 -2 53.94 2.61
6 -10 -2 53.18 2.45
-6 10 2 51.31 2.59
-6 10 2 49.53 2.59
-6 10 2 55.59 2.11
-6 10 2 54.25 2.35
6 -10 -1 63.25 2.36
6 -10 -1 61.56 2.31
6 -10 -1 63.42 2.74
6 -10 -1 65.04 2.89
6 -10 -1 66.34 2.82
-6 10 1 60.82 2.92
-6 10 1 67.51 2.87
-6 10 1 62.77 2.33
-6 10 1 60.71 2.75
-6 10 1 63.58 2.57
6 -10 0 95.92 3.43
6 -10 0 92.1 2.28
6 -10 0 94.47 3.66
6 -10 0 96.18 3.17
6 -10 0 94.02 3.56
6 -10 0 89.55 3.08
-6 10 0 97.9 3.57
-6 10 0 97.44 3.71
-6 10 0 97.27 3.07
-6 10 0 99.76 3.4
-6 10 0 99.77 3.62
6 -10 1 33.45 1.96
6 -10 1 34.47 2.44
6 -10 1 33.5 2.28
6 -10 1 33.35 2.01
6 -10 1 27.95 1.93
6 -10 1 31.17 1.38
6 -10 1 35.24 2.29
-6 10 -1 34.54 2.5
-6 10 -1 38 1.87
-6 10 -1 35.88 2.39
-6 10 -1 38.64 2.49
6 -10 2 43.16 2.54
6 -10 2 37.64 2.23
6 -10 2 40.99 1.71
6 -10 2 38.83 2.69
6 -10 2 40.4 2.52
6 -10 2 41.15 2.27
6 -10 2 36.94 2.22
-6 10 -2 41.75 2.64
-6 10 -2 45.13 2.05
-6 10 -2 38.41 2.6
6 -10 3 18.08 2.41
6 -10 3 17.64 1.86
6 -10 3 17.87 1.91
6 -10 3 20.67 2.01
6 -10 3 19.39 2.07
6 -10 3 19.12 1.46
-6 10 -3 20.42 2.52
-6 10 -3 19.12 1.62
-6 10 -3 18.43 2.33
-6 10 -3 19.01 2.32
-6 10 -3 17.56 2.05
6 -10 4 44.78 2.19
6 -10 4 44.71 2.77
6 -10 4 47.41 2.81
6 -10 4 46.45 2.91
6 -10 4 36.63 2.95
-6 10 -4 44.75 3.06
-6 10 -4 45.88 3.16
-6 10 -4 50.73 2.81
-6 10 -4 48.86 2.39
6 -10 5 25.86 2.8
6 -10 5 28.11 2.71
6 -10 5 23.01 2.89
6 -10 5 24.05 2.1
6 -10 5 28.06 2.6
-6 10 -5 25.06 2.91
-6 10 -5 24.41 3.01
-6 10 -5 26.29 2.07
-6 10 -5 26.72 2.4
6 -10 6 3.74 1.66
6 -10 6 2.33 1.69
6 -10 6 2.31 1.68
6 -10 6 2.88 1.86
6 -10 6 1.98 1.34
6 -10 6 3.06 1.69
6 -10 6 5.13 1.97
-6 10 -6 2.05 1.18
-6 10 -6 1.53 1.9
-6 10 -6 0.91 1.95
-6 10 -6 2.74 1.65
6 -10 7 15.71 2.63
6 -10 7 19.63 2.7
6 -10 7 20.68 2.48
6 -10 7 17.67 2.76
6 -10 7 17.23 2.08
-6 10 -7 13.14 2.46
-6 10 -7 18.71 2.06
6 -10 8 5.38 2.23
6 -10 8 5.64 2.04
6 -10 8 7.64 2.49
6 -10 8 10.66 2.55
6 -10 8 7.39 2.54
-6 10 -8 7.47 1.91
-6 10 -8 5.23 2.34
6 -10 9 2.1 2.73
6 -10 9 6.85 2.43
6 -10 9 10 2.99
6 -10 9 3.98 2.74
-7 11 9 0.99 2.01
-7 11 9 -0.62 2
-7 11 9 3.64 1.38
-7 11 8 8.44 2.12
-7 11 8 10.09 1.84
-7 11 8 9.96 1.48
-7 11 7 14.69 1.72
-7 11 7 8.51 1.36
-7 11 7 13.9 1.42
-7 11 7 11.79 1.93
-7 11 7 12.34 2.02
7 -11 -6 4.9 1.16
7 -11 -6 4.64 1
-7 11 6 3.28 1.08
-7 11 6 3.45 0.97
-7 11 6 6.99 1.77
-7 11 6 3.57 1.57
-7 11 6 3.55 1.15
7 -11 -5 5.03 1.38
-7 11 5 4.32 1.13
-7 11 5 4.18 1.62
-7 11 5 5.5 1.04
-7 11 5 5 1.24
-7 11 5 6.31 1.58
7 -11 -4 16.45 1.99
7 -11 -4 15.94 1.76
-7 11 4 20.4 2.35
-7 11 4 16.16 1.99
-7 11 4 18.08 2.32
-7 11 4 15.99 1.68
-7 11 4 16.78 1.46
7 -11 -3 81.28 3.19
7 -11 -3 82.65 3.26
-7 11 3 86.45 3.14
-7 11 3 82.05 3.33
-7 11 3 91.63 3.61
-7 11 3 87.67 2.91
-7 11 3 85.54 3.57
7 -11 -2 35.16 1.69
7 -11 -2 36.06 2.24
7 -11 -2 39.6 2.39
7 -11 -2 37.87 1.77
-7 11 2 41.04 2.54
-7 11 2 37.88 2.72
-7 11 2 38.69 2.6
-7 11 2 39.43 2.13
-7 11 2 35.5 1.92
7 -11 -1 4.65 0.96
7 -11 -1 5.66 1.09
7 -11 -1 3.85 1.18
7 -11 -1 6.69 1.38
-7 11 1 6.31 1.22
-7 11 1 7.9 1.58
-7 11 1 6.59 1.56
-7 11 1 6.2 1.02
-7 11 1 6.97 1.55
7 -11 0 2.84 0.91
7 -11 0 3.26 1.31
7 -11 0 3.43 1.1
7 -11 0 1.78 1.09
-7 11 0 2.73 0.95
-7 11 0 3.53 1.43
-7 11 0 5.59 1.64
-7 11 0 3.68 1.41
7 -11 1 65.92 2.86
7 -11 1 64.45 3.18
7 -11 1 62.6 3.45
7 -11 1 57.22 3.32
7 -11 1 65.22 2.02
7 -11 1 61.15 2.73
-7 11 -1 57.9 3.18
-7 11 -1 63.54 2.55
-7 11 -1 57.97 3.19
7 -11 2 148.19 5.17
7 -11 2 153.97 4.88
7 -11 2 136.56 5.19
7 -11 2 144.94 3.84
7 -11 2 150.26 4.76
-7 11 -2 146.15 5.15
-7 11 -2 153.13 4.42
7 -11 3 12.18 1.7
7 -11 3 12.19 1.34
7 -11 3 12.36 1.85
7 -11 3 10.41 1.86
7 -11 3 11.02 1.68
-7 11 -3 12.83 1.56
-7 11 -3 12.74 2.15
-7 11 -3 14.53 2.18
7 -11 4 8.33 1.66
7 -11 4 10.81 1.82
7 -11 4 13.43 1.96
7 -11 4 7.61 1.91
7 -11 4 9.44 1.25
7 -11 4 8.23 1.75
-7 11 -4 11.85 2.34
-7 11 -4 10.14 1.35
-7 11 -4 9.66 2.15
7 -11 5 6.7 2.14
7 -11 5 3.92 1.7
7 -11 5 7.34 1.73
7 -11 5 7.01 2.01
7 -11 5 7.13 1.87
7 -11 5 3.26 1.65
7 -11 5 5.87 1.35
-7 11 -5 4.86 2.01
-7 11 -5 6.86 2.19
-7 11 -5 6.56 1.42
7 -11 6 45.12 3.61
7 -11 6 35.61 3.57
7 -11 6 41.23 4.23
7 -11 6 45.25 2.93
7 -11 6 38.38 3.4
-7 11 -6 40.76 4.11
-7 11 -6 36.18 3.37
-7 11 -6 43.94 2.91
7 -11 7 5.63 2.6
7 -11 7 5.09 2.81
7 -11 7 9.35 1.92
7 -11 7 9.33 2.33
7 -11 7 10.88 2.58
-7 11 -7 8.02 2.42
-7 11 -7 5.4 1.89
7 -11 8 0.86 2.64
7 -11 8 -0.94 2.31
7 -11 8 0.34 2.49
7 -11 8 -3.67 3.22
7 -11 8 2.32 2.29
-7 11 -8 -0.31 2.55
-8 12 8 18.18 2.36
-8 12 8 12.02 2.95
-8 12 8 10.6 2.39
-8 12 8 14.01 2.42
-8 12 7 4.02 2.13
-8 12 7 0.29 1.8
-8 12 7 -0.85 1.25
-8 12 7 1.84 1.37
-8 12 7 4.93 2.22
-8 12 7 -1.88 0.94
8 -12 -6 14.12 1.74
8 -12 -6 10.86 1.46
8 -12 -6 13.29 1.96
-8 12 6 11.16 1.62
-8 12 6 12.57 2.33
-8 12 6 9.66 2.14
-8 12 6 10.94 1.34
-8 12 6 13.64 1.58
8 -12 -5 6.28 1.59
8 -12 -5 5.43 1.64
8 -12 -5 5.67 1.4
-8 12 5 6.77 1.23
-8 12 5 8.41 1.42
-8 12 5 9.42 2
-8 12 5 3.93 1.8
-8 12 5 6.12 1.61
8 -12 -4 21.16 2.43
8 -12 -4 22.22 2.57
8 -12 -4 21.42 2.17
-8 12 4 25.15 2.43
-8 12 4 23.46 1.87
-8 12 4 22.67 2.02
-8 12 4 23.75 2.76
-8 12 4 22.09 2.87
8 -12 -3 10.46 1.62
8 -12 -3 10.75 1.73
8 -12 -3 11.25 1.87
-8 12 3 12.06 1.5
-8 12 3 11.01 1.84
-8 12 3 9.12 1.97
-8 12 3 13.29 1.97
-8 12 3 9.41 1.27
8 -12 -2 20.49 1.65
8 -12 -2 18.87 2.52
8 -12 -2 21.35 2.36
8 -12 -2 17.73 1.53
8 -12 -2 18.84 2.1
-8 12 2 19.62 1.97
-8 12 2 15.37 1.68
-8 12 2 19.18 2.27
-8 12 2 19.14 2.04
-8 12 2 19.16 2.29
8 -12 -1 79.99 3.6
8 -12 -1 83.35 2.98
8 -12 -1 75.61 2.99
-8 12 1 73.9 3.79
-8 12 1 74.55 2.92
-8 12 1 76.56 3.22
-8 12 1 73.51 3.61
-8 12 1 69.33 3.53
8 -12 0 37.52 2.4
8 -12 0 37.39 2.79
8 -12 0 44.08 2.43
-8 12 0 35.91 2.95
-8 12 0 36.99 2.25
-8 12 0 42.23 3.33
-8 12 0 36.7 2.97
8 -12 1 20.01 2.11
8 -12 1 16.58 1.2
8 -12 1 19.34 2.36
8 -12 1 10.71 2.06
-8 12 -1 15.08 1.97
-8 12 -1 18.44 1.85
-8 12 -1 17.52 2.25
8 -12 2 0.37 1.29
8 -12 2 3.82 1.36
8 -12 2 0.74 1.63
8 -12 2 2.49 0.91
8 -12 2 0.65 1.62
8 -12 2 0.78 1.31
8 -12 2 0.87 1.22
-8 12 -2 1.63 1.78
-8 12 -2 1.1 1.11
-8 12 -2 -0.95 1.77
-8 12 -2 1.54 1.79
8 -12 3 48.06 3.12
8 -12 3 44.73 3.12
8 -12 3 42.28 3.41
8 -12 3 48.94 3.59
8 -12 3 39.94 3.61
8 -12 3 52.65 2.28
8 -12 3 50.52 3.14
-8 12 -3 47.07 3.74
-8 12 -3 43.01 3.68
-8 12 -3 43.75 3.67
-8 12 -3 47.62 2.66
-8 12 -3 46.17 3.3
8 -12 4 28.73 3.75
8 -12 4 31.1 3.11
8 -12 4 30.59 3.09
8 -12 4 30.31 3.4
8 -12 4 32.41 2.25
8 -12 4 32.79 3.03
8 -12 4 35.4 3.35
-8 12 -4 24.41 3.2
-8 12 -4 32.21 3.8
-8 12 -4 29.04 3.68
-8 12 -4 34.85 2.55
8 -12 5 13.29 2.32
8 -12 5 19.25 2.41
8 -12 5 14.81 2.51
8 -12 5 15.21 2.92
8 -12 5 12.4 2.31
-8 12 -5 8.52 2.58
-8 12 -5 19.14 2.46
-8 12 -5 16.7 2.44
8 -12 6 11.24 2.5
8 -12 6 8.9 2.42
8 -12 6 7.29 3.06
8 -12 6 10.5 1.99
8 -12 6 10.82 2.33
-8 12 -6 12.86 2.6
-8 12 -6 8.61 1.98
8 -12 7 2.56 2.69
8 -12 7 1.33 2.85
8 -12 7 1.54 2.89
8 -12 7 7.28 2.31
8 -12 7 7.13 2.8
-8 12 -7 2.1 2.78
-8 12 -7 1.76 2.24
-9 13 7 0.98 1.48
-9 13 7 0.4 1.3
-9 13 7 -0.73 2.17
-9 13 7 -0.63 2.72
-9 13 7 4.42 2.62
-9 13 7 -1.33 1.56
9 -13 -6 14.67 2.13
-9 13 6 14.69 2.74
-9 13 6 17.42 2.79
-9 13 6 15.21 1.93
-9 13 6 17.06 2.34
-9 13 6 15.81 2.07
9 -13 -5 -0.64 1.86
9 -13 -5 0.89 1.61
-9 13 5 3.58 1.31
-9 13 5 3.13 2.22
-9 13 5 3.93 2.2
-9 13 5 2.53 1.46
-9 13 5 1.41 1.75
9 -13 -4 16.85 2.42
9 -13 -4 15.57 2.28
-9 13 4 14.38 2.44
-9 13 4 21.6 1.99
-9 13 4 18.18 2.25
-9 13 4 17.9 2.71
-9 13 4 16.89 2.07
9 -13 -3 6.4 1.92
9 -13 -3 5.26 1.59
-9 13 3 3.52 1.29
-9 13 3 7.47 1.57
-9 13 3 3.42 1.97
-9 13 3 4.8 2.15
-9 13 3 6.54 1.72
9 -13 -2 3.3 1.85
9 -13 -2 6.98 1.12
9 -13 -2 5.8 1.51
9 -13 -2 7.16 1.77
9 -13 -2 6.88 1.26
-9 13 2 6.25 2.09
-9 13 2 6.79 1.33
-9 13 2 8.51 2.01
-9 13 2 5.44 1.94
9 -13 -1 8.29 1.73
9 -13 -1 8.17 2.18
9 -13 -1 12.17 2.04
9 -13 -1 9.14 1.36
9 -13 -1 9.27 1.57
-9 13 1 9.24 2.11
-9 13 1 9.59 2.09
-9 13 1 13.63 2.45
-9 13 1 10.27 1.54
9 -13 0 14.49 2.4
9 -13 0 13.28 1.83
9 -13 0 16.35 1.88
9 -13 0 13.07 1.99
9 -13 0 14.24 2.29
-9 13 0 11.1 2.44
-9 13 0 13.52 2.32
-9 13 0 15.56 2.01
-9 13 0 12.22 2.39
9 -13 1 24.9 1.46
9 -13 1 23.74 3.23
9 -13 1 27.84 2.79
9 -13 1 26.98 2.67
9 -13 1 20.43 2.66
9 -13 1 22.45 2.92
-9 13 -1 24.23 3.35
-9 13 -1 22.07 2.9
-9 13 -1 24.09 2.79
-9 13 -1 20.61 2.29
9 -13 2 14.98 1.59
9 -13 2 7.5 2.21
9 -13 2 13.77 1.91
9 -13 2 14.85 2.39
9 -13 2 13.51 2.44
9 -13 2 11.42 2.15
-9 13 -2 15.25 2.72
-9 13 -2 7.56 2.41
-9 13 -2 8.55 1.64
-9 13 -2 12.72 2.57
9 -13 3 32.41 3.48
9 -13 3 30.03 3.02
9 -13 3 29.22 2.19
9 -13 3 31.36 3.24
9 -13 3 23.86 3.08
9 -13 3 30.61 3.34
-9 13 -3 32.44 3.53
-9 13 -3 33.61 2.78
-9 13 -3 39.19 4.15
-9 13 -3 37.14 4.16
9 -13 4 10.85 2.24
9 -13 4 15 2.57
9 -13 4 11.33 2.95
9 -13 4 13.85 1.78
9 -13 4 11.82 2.35
-9 13 -4 10.39 2.77
-9 13 -4 15.9 2.01
-9 13 -4 14.12 2.76
9 -13 5 19.69 2.61
9 -13 5 22.49 3.67
9 -13 5 20.54 2.83
9 -13 5 12.52 2.03
-9 13 -5 18.42 2.48
-9 13 -5 12.55 2.86
-9 13 -5 10.32 3.03
9 -13 6 11.03 2.7
9 -13 6 2.67 2.64
9 -13 6 4.21 2.06
9 -13 6 6.16 2.82
-9 13 -6 7.06 2.57
-10 14 6 5.73 2
-10 14 6 7.81 1.64
-10 14 6 2.07 2.88
-10 14 6 3.24 3
10 -14 -5 1.31 2.26
-10 14 5 0.57 1.46
-10 14 5 1.31 1.71
-10 14 5 6.28 2.87
-10 14 5 -0.71 2.36
10 -14 -4 0.5 2.19
10 -14 -4 1.74 1.86
-10 14 4 1.57 2.66
-10 14 4 0.76 1.74
-10 14 4 1.08 1.46
-10 14 4 1.37 1.63
-10 14 4 0.98 2.54
10 -14 -3 11.63 2.12
10 -14 -3 12.56 2.47
-10 14 3 16.8 1.82
-10 14 3 15.47 2.72
-10 14 3 12.85 2.48
-10 14 3 7.25 2.72
10 -14 -2 26.7 2.39
10 -14 -2 26.15 3.45
10 -14 -2 24.18 2.08
10 -14 -2 24.64 3.08
-10 14 2 22.85 2.94
-10 14 2 27.24 3.52
-10 14 2 29.61 2.55
10 -14 -1 4.7 1.45
10 -14 -1 4.08 1.79
10 -14 -1 1.17 2.07
10 -14 -1 5.08 1.75
-10 14 1 6.65 2.25
-10 14 1 4.43 2.44
-10 14 1 5.59 1.54
10 -14 0 15.06 2.02
10 -14 0 14.66 2.51
10 -14 0 11.9 2.4
-10 14 0 14.46 1.81
-10 14 0 11.76 2.67
-10 14 0 12.34 2.56
10 -14 1 7.97 1.87
10 -14 1 3.99 2.11
10 -14 1 6.01 2.05
-10 14 -1 4.68 1.6
-10 14 -1 2.44 2.47
-10 14 -1 5.73 2.65
10 -14 2 5.67 2.19
10 -14 2 2.18 2.21
10 -14 2 3.71 1.26
10 -14 2 2.62 1.9
-10 14 -2 3.35 2.59
-10 14 -2 3.89 2.7
-10 14 -2 4.04 1.73
10 -14 3 17.53 2.42
10 -14 3 10.39 1.7
10 -14 3 12.93 2.82
-10 14 -3 17.69 3.33
-10 14 -3 14.17 2.24
10 -14 4 2.67 2.28
10 -14 4 5.54 1.93
10 -14 4 3.92 2.57
10 -14 4 0.25 2.63
-10 14 -4 5.16 3.37
-10 14 -4 2.05 1.97
10 -14 5 13.54 3.39
10 -14 5 7.82 2.77
10 -14 5 11.53 2.33
10 -14 5 13.43 2.99
-10 14 -5 11.76 2.69
-11 15 5 11.67 2.18
11 -15 -4 9.14 2.93
-11 15 4 5.87 1.97
-11 15 4 4.89 3.23
11 -15 -3 2.46 2.58
11 -15 -3 7.66 3.09
-11 15 3 4.05 1.71
-11 15 3 10.78 3.27
11 -15 -2 3.13 1.6
11 -15 -2 6.63 2.58
-11 15 2 7.08 1.78
-11 15 2 3.64 3
11 -15 -1 2.52 2.35
11 -15 -1 3.4 1.82
-11 15 1 7.42 2.63
-11 15 1 5.7 1.75
-11 15 1 3.92 2.88
11 -15 0 9.96 2.69
11 -15 0 10.14 2.11
11 -15 0 9.11 2.53
-11 15 0 14.48 2.28
-11 15 0 13.7 3.02
11 -15 1 4.39 2.09
11 -15 1 9.19 2.71
11 -15 1 3.8 2.65
-11 15 -1 9.86 3.16
-11 15 -1 8.53 2.11
11 -15 2 9.58 2.99
11 -15 2 11.24 2.61
-11 15 -2 11.33 2.26
-11 15 -2 13.53 3.55
11 -15 3 1.94 1.95
11 -15 3 0.28 2.81
11 -15 3 2.52 2.68
-11 15 -3 -4.36 2.16
-11 15 -3 -0.35 3.68
11 -15 4 2.43 3.36
11 -15 4 1.39 2.76
11 -15 4 4.08 2.41
-11 15 -4 3.69 2.64
-12 16 2 0.02 2.16
12 -16 -1 10.37 2.47
12 -16 -1 10.83 3.36
-12 16 1 13.28 2.31
12 -16 0 19.52 3.66
12 -16 0 19.73 2.74
-12 16 0 29.62 3.7
12 -16 1 -1.84 2.53
12 -16 1 1.35 3.47
-12 16 -1 0.23 2.37
-20 14 -2 6.21 2.53
20 -14 2 6.39 3.35
20 -14 2 6.27 2.76
-20 14 -1 34.38 4.02
20 -14 1 30.02 3.99
20 -14 1 31.74 4.02
-20 14 0 34.39 3.61
20 -14 0 28.52 3.47
20 -14 0 28.82 3.6
-20 14 1 4.75 2.07
20 -14 -1 0.82 2.52
20 -14 -1 1.8 1.99
20 -14 -1 0.91 2.71
-20 14 2 2.11 2
20 -14 -2 1.4 2.79
20 -14 -2 -0.54 2.7
20 -14 -2 2.18 1.97
-20 14 3 7.87 2.09
20 -14 -3 7.05 3.37
-20 14 4 18.53 2.87
-20 14 4 16.04 2.4
-19 13 -4 22.4 3.33
19 -13 4 26.33 3.6
19 -13 4 20.06 3.34
19 -13 4 23.91 2.67
-19 13 -3 11.28 2.4
19 -13 3 12.51 2.14
19 -13 3 9.49 2.43
-19 13 -2 9.55 2.12
19 -13 2 16.26 2.94
19 -13 2 15.35 2.49
19 -13 2 12.99 1.75
-19 13 -1 8.93 2.02
19 -13 1 12.76 2.83
19 -13 1 10.95 1.6
19 -13 1 10.35 2.28
-19 13 0 -1.33 1.6
19 -13 0 -0.85 1.85
19 -13 0 4.36 2.61
19 -13 0 5.66 2.28
19 -13 0 4.62 2.24
-19 13 1 19.52 2.29
19 -13 -1 17.36 2.39
19 -13 -1 17.06 2.76
19 -13 -1 13.91 2.65
19 -13 -1 20.21 2.71
-19 13 2 21.38 2.66
19 -13 -2 24.31 3.49
19 -13 -2 26.31 2.62
19 -13 -2 20.13 2.83
-19 13 3 15.95 1.93
19 -13 -3 18.73 2.71
19 -13 -3 13.58 1.96
19 -13 -3 15.84 2.4
19 -13 -3 18.05 2.23
-19 13 4 10.68 2.18
-19 13 4 11.48 1.94
19 -13 -4 7.98 2.43
-19 13 5 3.4 2.17
-19 13 5 2.5 1.7
-19 13 6 23.16 3
-19 13 6 14.91 2.14
-18 12 -5 -0.45 2.47
18 -12 5 3.44 2.8
18 -12 5 0.32 2.04
18 -12 5 3.56 2.64
18 -12 5 -0.67 2.79
-18 12 -4 5.81 2.71
-18 12 -4 8.38 2.26
18 -12 4 7.03 2.81
18 -12 4 4.08 2.63
18 -12 4 4.26 2.36
18 -12 4 9.4 1.85
-18 12 -3 6.52 1.78
18 -12 3 -2.22 2.3
18 -12 3 4.53 2.45
18 -12 3 3.81 2.1
18 -12 3 3.03 1.56
-18 12 -2 4.16 1.53
18 -12 2 2 1.73
18 -12 2 4.24 2.18
18 -12 2 0.53 1.16
18 -12 2 5.26 2.16
-18 12 -1 5.36 1.6
18 -12 1 1.7 2.04
18 -12 1 3.51 2.01
18 -12 1 5.36 1.82
18 -12 1 1.65 1.03
18 -12 1 4.17 1.63
18 -12 1 8.41 2.11
-18 12 0 11.87 1.82
-18 12 0 8.8 2.51
18 -12 0 12.1 1.16
18 -12 0 9.59 2.09
18 -12 0 10.65 1.94
18 -12 0 11.46 2.34
18 -12 0 11.88 2.12
18 -12 0 9.6 2.21
-18 12 1 30.97 3.94
-18 12 1 25.1 3.09
-18 12 1 36.06 2.63
18 -12 -1 31.91 3.25
18 -12 -1 34.52 3.12
18 -12 -1 33.29 2.57
18 -12 -1 26.22 3.2
-18 12 2 3.81 2.68
-18 12 2 1.52 2.26
-18 12 2 5.02 1.49
-18 12 2 6.16 2.54
18 -12 -2 3.2 1.71
18 -12 -2 5.56 1.4
18 -12 -2 4.77 1.88
18 -12 -2 5.76 1.62
-18 12 3 13.3 2.5
-18 12 3 11.74 2.65
-18 12 3 10.72 2.65
-18 12 3 8.92 1.51
18 -12 -3 13.47 1.63
18 -12 -3 11.53 1.37
18 -12 -3 12.25 2.07
18 -12 -3 7.9 1.76
-18 12 4 14.31 2.71
-18 12 4 16.99 3.11
-18 12 4 12.31 1.66
-18 12 4 13.85 2.85
18 -12 -4 17.21 2.34
18 -12 -4 14.91 2.05
-18 12 5 31.34 4.2
-18 12 5 23.85 3.11
-18 12 5 29.96 2.55
-18 12 5 28.64 2.99
18 -12 -5 20.4 2.7
18 -12 -5 20.06 2.94
-18 12 6 10.14 1.71
-18 12 6 11.23 2.81
-18 12 6 13.5 2.24
-18 12 7 3.78 1.56
-18 12 7 -4.34 2.15
-17 11 -6 0.74 2.35
17 -11 6 3.32 2.57
17 -11 6 -0.27 2.11
17 -11 6 5.02 2.56
17 -11 6 1.14 2.48
-17 11 -5 6.14 1.93
17 -11 5 5.22 2.46
17 -11 5 2.98 2.2
17 -11 5 3.01 2.31
17 -11 5 1.84 2.05
17 -11 5 7.45 1.94
-17 11 -4 12.01 2.72
-17 11 -4 17.71 2.11
17 -11 4 14.62 1.9
17 -11 4 8.82 2.38
17 -11 4 15.62 2.55
17 -11 4 15.79 2.39
17 -11 4 12.16 2.53
-17 11 -3 3.83 2.44
-17 11 -3 4.51 1.49
17 -11 3 2.82 1.66
17 -11 3 0.02 1.79
17 -11 3 0.8 1.72
17 -11 3 4.61 2.08
17 -11 3 2.57 1.25
17 -11 3 4.14 1.91
-17 11 -2 21.42 2.18
-17 11 -2 19.39 2.73
-17 11 -2 22.71 3.02
17 -11 2 19.64 2.65
17 -11 2 23.9 1.79
17 -11 2 21.71 2.53
17 -11 2 21.91 2.51
17 -11 2 21.2 3.01
17 -11 2 20.12 2.36
-17 11 -1 8.85 2.22
-17 11 -1 4 1.34
-17 11 -1 4.34 2
17 -11 1 2.81 1.69
17 -11 1 5.09 1.72
17 -11 1 8.94 1.94
17 -11 1 4.18 0.9
17 -11 1 3.71 1.56
17 -11 1 2.15 1.39
-17 11 0 11.86 1.6
-17 11 0 15.15 2.36
-17 11 0 13.38 2.44
17 -11 0 21.41 2.56
17 -11 0 20.63 2.24
17 -11 0 23.7 2.74
17 -11 0 14.7 1.32
-17 11 1 5.78 1.25
-17 11 1 10.13 2.14
-17 11 1 5.47 2.05
-17 11 1 6.78 2.02
17 -11 -1 8.2 1.68
17 -11 -1 10.56 1.6
17 -11 -1 7.25 1.8
17 -11 -1 8.08 1.75
17 -11 -1 9.26 1.47
-17 11 2 9.82 1.42
-17 11 2 7.16 2.08
-17 11 2 4.68 2
-17 11 2 12.5 2.39
17 -11 -2 9.68 1.56
17 -11 -2 10.57 1.66
17 -11 -2 10.54 1.8
17 -11 -2 8.37 1.3
17 -11 -2 12.34 1.97
-17 11 3 36.74 3.43
-17 11 3 38.98 3.61
-17 11 3 35.93 3.56
-17 11 3 40.51 2.37
17 -11 -3 33.38 2.68
17 -11 -3 35.77 2.14
17 -11 -3 31.58 2.58
17 -11 -3 38.41 2.63
17 -11 -3 40.64 1.94
-17 11 4 0.52 2
-17 11 4 4.41 1.15
-17 11 4 5.17 2.25
-17 11 4 4.69 2.04
17 -11 -4 3.14 1.31
17 -11 -4 1.03 1.4
17 -11 -4 1.89 1.34
-17 11 5 6.79 1.32
-17 11 5 6.53 1.65
-17 11 5 5.82 2.4
-17 11 5 11.91 2.33
-17 11 5 11.25 2.1
17 -11 -5 6.45 1.54
17 -11 -5 9.2 1.53
-17 11 6 1.12 1.98
-17 11 6 -0.74 2.42
-17 11 6 1.95 1.17
-17 11 6 0.44 1.59
-17 11 6 -1.86 1.9
17 -11 -6 -0.95 1.46
17 -11 -6 1.07 1.26
-17 11 7 16.51 2.09
-17 11 7 13.55 2.66
-17 11 7 16.53 2.39
-17 11 8 3.54 2.57
-17 11 8 3.42 2.26
-17 11 8 4.39 1.4
16 -10 7 22.12 2.82
16 -10 7 20.81 3.44
16 -10 7 16.68 3.27
16 -10 7 18.74 3.04
16 -10 7 20.21 3.15
-16 10 -6 16.87 2.34
-16 10 -6 17.58 2.31
16 -10 6 17.5 2.46
16 -10 6 24.44 2.98
16 -10 6 16.36 2.51
16 -10 6 16.15 2.67
16 -10 6 15.21 2.83
-16 10 -5 21.74 2.97
-16 10 -5 25.19 2.93
-16 10 -5 25.86 2.54
-16 10 -5 23.76 3.32
16 -10 5 21.16 2.55
16 -10 5 32.26 2.66
16 -10 5 23.55 2.74
16 -10 5 25.48 3.14
16 -10 5 25.52 3.11
-16 10 -4 16.08 2.08
-16 10 -4 10.96 2.47
-16 10 -4 5.75 2.27
-16 10 -4 13.42 2.05
16 -10 4 12.67 1.67
16 -10 4 13.66 2.37
16 -10 4 15.8 2.23
16 -10 4 9.95 1.98
16 -10 4 13.1 2.1
16 -10 4 11.08 2.11
16 -10 4 13.55 2.06
-16 10 -3 5.55 2.08
-16 10 -3 7.73 2.05
-16 10 -3 5.33 1.22
16 -10 3 3.77 1.59
16 -10 3 5.41 1.12
16 -10 3 4.24 1.49
16 -10 3 5.93 1.6
16 -10 3 8 1.84
16 -10 3 5.94 1.63
-16 10 -2 19.43 2.49
-16 10 -2 24.91 3.19
-16 10 -2 27.32 2.02
16 -10 2 28.19 1.75
16 -10 2 26.46 2.53
16 -10 2 30.37 2.55
16 -10 2 22.44 2.51
16 -10 2 23.45 2.62
-16 10 -1 9.95 1.86
-16 10 -1 12.44 2.38
-16 10 -1 9.22 1.34
16 -10 1 10.34 1.76
16 -10 1 10.29 1.13
16 -10 1 11.03 1.77
16 -10 1 12.3 1.65
-16 10 0 34.07 3.28
-16 10 0 37.58 2.1
-16 10 0 36.19 3.13
16 -10 0 43.41 2.44
16 -10 0 40.19 2.54
16 -10 0 45.39 2.68
16 -10 0 40.3 1.61
16 -10 0 43.42 2.75
16 -10 0 44.65 2.77
-16 10 1 6.57 1.78
-16 10 1 4.34 1.45
-16 10 1 3.45 0.94
-16 10 1 2.04 1.64
16 -10 -1 5.57 1.32
16 -10 -1 4.86 1.36
16 -10 -1 4.8 0.65
16 -10 -1 1.84 1.26
16 -10 -1 4.29 1.06
16 -10 -1 4.32 1.34
-16 10 2 29.09 2.85
-16 10 2 26.74 2.75
-16 10 2 26.22 1.9
-16 10 2 34.34 3.14
16 -10 -2 29.17 2.3
16 -10 -2 23.75 1.93
16 -10 -2 25.15 2.19
16 -10 -2 26.59 1.77
16 -10 -2 24.18 2.15
-16 10 3 16.33 1.73
-16 10 3 18.81 2.49
-16 10 3 19.43 2.7
-16 10 3 13.44 1.96
16 -10 -3 16.5 1.55
16 -10 -3 15.98 2.01
16 -10 -3 18.93 1.39
16 -10 -3 18.09 1.93
-16 10 4 12.12 1.94
-16 10 4 7.18 2
-16 10 4 9.82 1.79
-16 10 4 8.97 1.26
16 -10 -4 9.2 1.45
16 -10 -4 10.6 1.4
-16 10 5 24.02 3.2
-16 10 5 23.19 2.77
-16 10 5 26.38 1.9
-16 10 5 30 2.43
-16 10 5 24.34 2.75
16 -10 -5 25.35 2.1
16 -10 -5 23.92 2.2
16 -10 -5 26.94 1.84
-16 10 6 5.25 1.17
-16 10 6 8.05 1.73
-16 10 6 7.88 1.86
-16 10 6 4.64 1.83
16 -10 -6 6.4 1.48
16 -10 -6 6.43 1.12
16 -10 -6 4.38 1.25
-16 10 7 22.54 1.84
-16 10 7 18.69 2.3
-16 10 7 22.29 2.52
-16 10 7 23.17 2.67
16 -10 -7 19.72 2.19
-16 10 8 1.87 2.08
-16 10 8 1.37 1.17
-16 10 8 2.55 1.89
-16 10 9 4.98 2.31
-16 10 9 6.79 2.31
-16 10 9 5.53 1.29
15 -9 8 15.03 3.26
15 -9 8 17.56 2.75
15 -9 8 17.42 2.91
15 -9 8 10.81 2.88
-15 9 -7 6.58 1.89
-15 9 -7 11.08 2.11
15 -9 7 7.6 2.31
15 -9 7 13.68 2.27
15 -9 7 7.59 2.36
15 -9 7 9.97 2.73
-15 9 -6 10.45 1.83
-15 9 -6 5.99 1.63
-15 9 -6 4.52 2.19
15 -9 6 6.71 1.88
15 -9 6 8.01 1.87
15 -9 6 11.62 2.08
15 -9 6 5.83 2.04
15 -9 6 9.65 2.08
-15 9 -5 11.15 2.23
-15 9 -5 12.52 1.72
-15 9 -5 13.81 2.74
-15 9 -5 12.31 1.7
15 -9 5 11.85 2.22
15 -9 5 10.3 1.88
15 -9 5 12.32 2.19
15 -9 5 10.57 1.57
15 -9 5 10.11 1.97
15 -9 5 8.52 1.92
15 -9 5 10.77 1.84
15 -9 4 38.18 3
15 -9 4 41.89 2.96
15 -9 4 39.67 3.18
15 -9 4 39.44 2.3
15 -9 4 31.35 2.71
15 -9 4 42.85 2.83
-15 9 -3 83.82 3.17
15 -9 3 97.59 3.16
15 -9 3 92.31 3.77
15 -9 3 87.51 3.91
15 -9 3 97.06 4.12
15 -9 3 90.74 3.7
-15 9 -2 33.49 1.97
-15 9 -2 30.35 2.86
-15 9 -2 35.41 3.03
15 -9 2 35.32 2.43
15 -9 2 34.69 1.78
15 -9 2 32.84 2.45
-15 9 -1 2.37 1.47
-15 9 -1 0.46 0.71
-15 9 -1 2.57 1.43
15 -9 1 1.24 1.06
15 -9 1 2.08 1.06
15 -9 1 1.29 1
15 -9 1 2.21 1.18
15 -9 1 0.69 1.13
15 -9 1 1.28 0.68
-15 9 0 22.52 2.44
-15 9 0 23.93 1.59
-15 9 0 16.93 2.47
15 -9 0 20.57 2.02
15 -9 0 20.43 1.99
15 -9 0 20.94 1.16
15 -9 0 20.89 1.75
15 -9 0 22.4 1.96
15 -9 0 19.46 1.82
-15 9 1 94.22 4.12
-15 9 1 92.15 3.09
-15 9 1 99.01 4
-15 9 1 94.55 3.85
15 -9 -1 97.63 3.25
15 -9 -1 96.96 3.26
15 -9 -1 91.71 3.68
15 -9 -1 91.83 3.36
15 -9 -1 98.29 3.33
15 -9 -1 96.9 2.41
-15 9 2 137.42 4.6
-15 9 2 134.61 4.94
-15 9 2 146.09 4.03
-15 9 2 137.48 4.8
15 -9 -2 140.81 4.12
15 -9 -2 140.26 3.95
15 -9 -2 138.72 3.97
15 -9 -2 134.59 4.03
15 -9 -2 138.4 4.56
-15 9 3 5.07 1.42
-15 9 3 7.99 1.68
-15 9 3 6.33 1.58
-15 9 3 7.27 1.05
15 -9 -3 4.4 1.01
15 -9 -3 7.59 1.01
15 -9 -3 7.34 0.93
15 -9 -3 7 1.14
-15 9 4 5.67 1.65
-15 9 4 5.78 1.46
-15 9 4 5.92 1.03
-15 9 4 5.81 1.44
15 -9 -4 5.98 0.75
15 -9 -4 7.85 1.13
15 -9 -4 7.17 0.74
15 -9 -4 7.93 1.32
-15 9 5 7.89 1.53
-15 9 5 9.02 1.47
-15 9 5 10.43 1.22
-15 9 5 9.06 1.56
15 -9 -5 9.06 1.12
15 -9 -5 7.71 1.24
-15 9 6 23.67 1.65
-15 9 6 22.19 2.29
-15 9 6 22.85 2.46
-15 9 6 18.44 2.18
15 -9 -6 21.92 2.01
15 -9 -6 21.92 1.77
-15 9 7 7.55 1.75
-15 9 7 6.19 1.08
-15 9 7 8.91 1.8
-15 9 7 4.56 1.48
15 -9 -7 8.32 1.31
-15 9 8 3.23 1.69
-15 9 8 2.35 0.99
-15 9 8 0.37 1.49
-15 9 8 3.43 1.84
-15 9 9 11.55 2.07
-15 9 9 12 1.3
-15 9 9 13.11 2.25
-15 9 10 1.65 2.06
14 -8 9 2.43 3.05
14 -8 9 5.94 2.73
14 -8 9 0.68 2.36
14 -8 9 0.82 2.99
14 -8 8 2.03 2.32
14 -8 8 2.49 2.13
14 -8 8 0.86 1.93
14 -8 8 0.05 2.13
14 -8 8 3.73 2.61
-14 8 -7 1.23 1.32
-14 8 -7 -0.97 1.33
14 -8 7 1.71 1.67
14 -8 7 2.26 2.08
14 -8 7 1.61 1.77
14 -8 7 2.51 1.83
14 -8 7 2.57 1.75
-14 8 -6 39.99 3.85
-14 8 -6 46.51 2.45
-14 8 -6 49.87 2.57
-14 8 -6 43.98 3.44
14 -8 6 40.73 3
14 -8 6 42.44 2.77
14 -8 6 47.63 3.13
14 -8 6 44.81 3.22
14 -8 6 44.69 3.13
14 -8 6 44.46 3.48
14 -8 6 40.74 3.53
-14 8 -5 68.74 3.51
-14 8 -5 75.21 2.98
-14 8 -5 72.31 2.81
14 -8 5 68.72 3.08
14 -8 5 73.25 3.26
14 -8 5 74.26 3.54
14 -8 5 73.01 3.7
14 -8 5 74.41 3.43
14 -8 5 78.21 3.85
-14 8 -4 13.87 1.54
-14 8 -4 10 1.76
-14 8 -4 14.23 1.58
14 -8 4 11.86 1.74
14 -8 4 8.44 1.67
14 -8 4 12.43 1.65
14 -8 4 12.1 1.46
14 -8 4 7.5 1.51
-14 8 -3 25.61 2.7
-14 8 -3 23.78 2.41
-14 8 -3 23.33 1.71
14 -8 3 25.44 2.34
14 -8 3 27.03 2.09
14 -8 3 28.56 2.31
14 -8 3 26.96 2.19
14 -8 3 26.45 1.66
14 -8 3 27.99 2.2
-14 8 -2 18.94 2.34
-14 8 -2 19.58 2.2
-14 8 -2 24.28 2.35
-14 8 -2 23.36 1.63
14 -8 2 19.25 2.02
14 -8 2 22.71 1.95
14 -8 2 23.21 1.88
14 -8 2 22.09 1.87
14 -8 2 18.59 1.89
14 -8 2 21.79 1.92
14 -8 2 23.05 1.47
-14 8 -1 184.64 6.04
-14 8 -1 194.16 5.68
-14 8 -1 198.1 5.88
-14 8 -1 200.84 5.06
14 -8 1 200.35 5.49
14 -8 1 204.67 5.57
14 -8 1 203.38 4.71
14 -8 1 195.34 5.21
14 -8 1 199.19 5.35
14 -8 1 190.94 5.9
-14 8 0 78.09 2.66
-14 8 0 77.11 3.35
-14 8 0 71.97 3.12
-14 8 0 73.74 3.44
14 -8 0 86.39 3.35
14 -8 0 84.68 2.32
14 -8 0 81.51 2.91
14 -8 0 85.56 3.02
14 -8 0 83.26 3
14 -8 0 75.79 2.88
-14 8 1 13.46 1.84
-14 8 1 10.08 1.55
-14 8 1 13.4 1.85
-14 8 1 10.53 1.15
14 -8 -1 12.4 1.36
14 -8 -1 14.32 1.54
14 -8 -1 11.68 1.44
14 -8 -1 10.79 1.45
14 -8 -1 14.06 1.44
14 -8 -1 12.09 0.83
-14 8 2 29.34 2.12
-14 8 2 31.09 1.59
-14 8 2 27.3 2.25
-14 8 2 34.14 2.35
14 -8 -2 33.54 1.71
14 -8 -2 32.79 1.86
14 -8 -2 33.98 1.82
14 -8 -2 33.26 1.67
14 -8 -2 33.47 2
-14 8 3 74.02 2.53
-14 8 3 73.8 3.25
-14 8 3 79.3 3.1
-14 8 3 79.31 3.32
14 -8 -3 65.38 2.18
14 -8 -3 68.56 2.4
14 -8 -3 68.75 2.48
14 -8 -3 71.3 2.24
14 -8 -3 67.32 2.74
-14 8 4 67.72 2.36
-14 8 4 64.25 2.98
-14 8 4 67.88 2.88
14 -8 -4 62.76 2.16
14 -8 -4 63.44 2.64
-14 8 5 4.96 1.24
-14 8 5 5.72 1.29
-14 8 5 6.36 1.22
-14 8 5 4.34 0.84
14 -8 -5 4.16 1.02
14 -8 -5 3.85 0.79
-14 8 6 23.76 1.99
-14 8 6 22.29 1.49
-14 8 6 18.52 2.04
-14 8 6 21.75 2.03
14 -8 -6 19.29 1.64
-14 8 7 2.37 1.31
-14 8 7 4.24 1.29
-14 8 7 2.91 0.81
-14 8 7 1.78 1.08
14 -8 -7 4.51 1.04
-14 8 8 13.34 1.8
-14 8 8 11.56 1.55
-14 8 8 12.47 1.44
-14 8 8 12.29 1.86
-14 8 9 9.03 1.14
-14 8 9 10.12 1.12
-14 8 9 6.93 1.14
-14 8 9 10.81 1.86
-14 8 9 9.07 1.74
-14 8 10 5.16 2.04
-14 8 10 4.32 1.26
13 -7 9 5.21 2.72
13 -7 9 2.32 2.22
13 -7 9 0.67 2.18
13 -7 9 1.65 2.2
-13 7 -8 18.61 2.12
13 -7 8 22.6 2.85
13 -7 8 15.73 2.65
13 -7 8 22.23 2.65
13 -7 8 19.13 2.5
13 -7 8 25.24 3.32
-13 7 -7 4.42 1.37
-13 7 -7 6.64 2.28
-13 7 -7 6.49 1.17
-13 7 -7 4.42 1.82
13 -7 7 5.77 1.57
13 -7 7 3.14 1.66
13 -7 7 4.05 1.55
13 -7 7 6.54 1.86
13 -7 7 5.57 1.64
13 -7 7 5.44 1.96
13 -7 7 5.63 2.17
-13 7 -6 30.57 2.04
-13 7 -6 24.42 3.07
-13 7 -6 29.04 1.85
-13 7 -6 26.59 2.77
13 -7 6 26.65 2.35
13 -7 6 32.68 2.72
13 -7 6 33.34 2.55
13 -7 6 32.73 2.45
13 -7 6 31.02 2.57
13 -7 6 33.57 2.87
-13 7 -5 12.92 1.49
-13 7 -5 11.95 1.52
-13 7 -5 12.99 1.77
13 -7 5 7.74 1.43
13 -7 5 14.95 1.75
13 -7 5 11.38 1.83
13 -7 5 12.55 1.59
13 -7 5 12.26 1.6
-13 7 -4 60.7 2.42
-13 7 -4 59.56 2.94
-13 7 -4 60.43 2.36
13 -7 4 65.23 2.78
13 -7 4 61.69 2.49
13 -7 4 61.17 3.01
13 -7 4 62.32 2.85
13 -7 4 63.74 3.09
-13 7 -3 39.49 2.43
-13 7 -3 40.7 2.75
-13 7 -3 39.62 1.89
13 -7 3 38.94 1.87
13 -7 3 42.3 2.42
13 -7 3 39.31 2.22
13 -7 3 41.16 2.35
13 -7 3 43.01 2.2
13 -7 3 37.97 2.33
-13 7 -2 74.22 3.08
-13 7 -2 78.63 3.3
-13 7 -2 76.14 2.6
-13 7 -2 69.54 3.31
13 -7 2 72.37 2.38
13 -7 2 69.45 2.94
13 -7 2 69.95 3.03
13 -7 2 72.67 2.87
13 -7 2 73.01 2.71
13 -7 2 71.57 2.87
-13 7 -1 69.38 2.88
-13 7 -1 66.25 2.95
-13 7 -1 66.55 3.13
-13 7 -1 71.37 2.41
13 -7 1 69.87 2.15
13 -7 1 69.06 2.54
13 -7 1 69.33 2.68
13 -7 1 71.77 2.73
13 -7 1 69.85 2.9
-13 7 0 28.85 2.17
-13 7 0 29.45 2.05
-13 7 0 30.72 1.53
-13 7 0 26.78 1.95
13 -7 0 28.89 1.76
13 -7 0 31.17 1.71
13 -7 0 29.71 1.83
13 -7 0 32.24 1.28
13 -7 0 32.39 1.71
13 -7 0 31.37 1.71
-13 7 1 103.05 3.45
-13 7 1 106.39 3.65
-13 7 1 97.27 3.67
-13 7 1 101.86 2.99
13 -7 -1 99.56 2.99
13 -7 -1 99.63 3.04
13 -7 -1 101.3 3.11
13 -7 -1 99.38 3.01
13 -7 -1 97.24 3.39
13 -7 -1 97.52 2.41
-13 7 2 68.27 2.25
-13 7 2 63.55 2.85
-13 7 2 66.7 2.81
-13 7 2 63.92 2.62
13 -7 -2 66.35 2.22
13 -7 -2 61.81 2.26
13 -7 -2 66 1.66
13 -7 -2 65 2.24
13 -7 -2 68.08 2.68
13 -7 -2 66.95 2.29
-13 7 3 123.46 3.27
-13 7 3 117.73 3.68
-13 7 3 115.12 3.91
13 -7 -3 122.8 3.83
13 -7 -3 122.07 3.16
13 -7 -3 121.44 3.17
13 -7 -3 120.35 3.33
13 -7 -3 122.41 3.28
-13 7 4 97.04 3.43
-13 7 4 95.83 3.14
-13 7 4 93.07 2.77
-13 7 4 102.24 3.28
13 -7 -4 94.51 2.72
13 -7 -4 91.43 3.1
13 -7 -4 90.28 2.58
-13 7 5 33.91 1.99
-13 7 5 32.02 1.53
-13 7 5 30.64 1.95
-13 7 5 33.49 1.92
13 -7 -5 27.92 1.47
13 -7 -5 26.45 1.21
13 -7 -5 26.4 1.74
-13 7 6 24.14 1.85
-13 7 6 24.14 1.82
-13 7 6 25.55 1.89
-13 7 6 25.45 1.13
-13 7 6 28.02 1.42
13 -7 -6 27.81 1.42
-13 7 7 10.37 1.37
-13 7 7 6.87 1.19
-13 7 7 8.16 0.95
-13 7 7 11.09 1.64
-13 7 7 10.55 1.08
13 -7 -7 10.05 1.2
-13 7 8 29.55 2.14
-13 7 8 26.44 1.62
-13 7 8 27.66 2.35
-13 7 8 26.57 1.85
-13 7 8 28.98 1.52
-13 7 9 7.41 1.2
-13 7 9 5.69 1.17
-13 7 9 5.1 1.44
-13 7 9 7.08 1.56
-13 7 10 3.52 1.43
-13 7 10 4.55 1.52
-13 7 10 4.01 2.03
-13 7 10 6.69 2.13
-13 7 10 5.86 1.44
-13 7 11 -0.31 2.13
-13 7 11 3.55 1.99
-13 7 11 -2.94 1.6
12 -6 10 2.47 2.33
12 -6 10 -1.22 2.37
12 -6 10 0.78 2.43
12 -6 10 3.78 2.76
12 -6 9 1.18 1.93
12 -6 9 -0.57 2.02
12 -6 9 4.5 1.88
12 -6 9 3.22 2.45
12 -6 9 2.22 1.96
-12 6 -8 0.41 1.27
-12 6 -8 0.83 2.16
12 -6 8 5.33 1.62
12 -6 8 1.24 2.03
12 -6 8 2.95 1.68
12 -6 8 2.88 1.88
12 -6 8 0.4 1.62
12 -6 8 4.24 1.86
12 -6 8 4.19 1.6
-12 6 -7 14.16 1.62
-12 6 -7 13.25 2.24
-12 6 -7 15.38 1.96
-12 6 -7 15.49 1.46
12 -6 7 16.81 2.31
12 -6 7 14.95 2.09
12 -6 7 13.75 1.66
12 -6 7 14.03 1.81
12 -6 7 17.87 2.33
12 -6 7 13.07 1.72
-12 6 -6 39.44 2.74
-12 6 -6 39.29 2.08
-12 6 -6 37.44 1.74
12 -6 6 39.76 2.31
12 -6 6 40.29 2.76
12 -6 6 30.39 2.25
12 -6 6 41.59 2.66
12 -6 6 37.3 2.46
-12 6 -5 11.36 1.58
-12 6 -5 11.83 1.35
-12 6 -5 10.82 1.87
-12 6 -5 9.94 1.23
12 -6 5 12.49 1.8
12 -6 5 10.57 1.48
12 -6 5 11.17 1.44
12 -6 5 14.77 1.61
12 -6 5 11.97 1.61
-12 6 -4 96.5 2.83
-12 6 -4 101.96 3.5
-12 6 -4 93.79 3.78
-12 6 -4 96.63 3.86
-12 6 -4 98.29 3.05
12 -6 4 87.49 2.97
12 -6 4 91.91 3.48
12 -6 4 87.65 3.46
12 -6 4 90.97 3.07
12 -6 4 86.4 3.26
-12 6 -3 15.44 1.85
-12 6 -3 18.42 1.72
-12 6 -3 15.68 1.84
-12 6 -3 17.35 1.24
12 -6 3 16.13 1.51
12 -6 3 16.41 1.26
12 -6 3 17.22 1.49
12 -6 3 14.17 1.54
12 -6 3 18.41 1.63
-12 6 -2 10.7 1.47
-12 6 -2 10.31 1.41
-12 6 -2 9.18 1.51
-12 6 -2 9.15 0.97
12 -6 2 11 1.33
12 -6 2 11.58 1.29
12 -6 2 9.3 0.95
12 -6 2 10.16 1.23
12 -6 2 10.12 1.21
12 -6 2 9.84 1.29
-12 6 -1 22.66 1.86
-12 6 -1 23.54 1.7
-12 6 -1 24.05 1.3
-12 6 -1 22.98 1.72
12 -6 1 22.14 1.6
12 -6 1 24.37 1.5
12 -6 1 24.29 1.55
12 -6 1 24.18 1.45
12 -6 1 23.37 1.14
-12 6 0 149.18 3.78
-12 6 0 144.18 4.37
-12 6 0 149.55 4.56
-12 6 0 147.44 4.23
12 -6 0 147.72 3.45
12 -6 0 145.97 3.84
12 -6 0 147.84 4.42
12 -6 0 148.68 4.1
12 -6 0 153.06 4.01
-12 6 1 166.47 3.73
-12 6 1 166.82 4.89
-12 6 1 167.32 4.57
-12 6 1 167.87 4.11
-12 6 1 171.1 4.79
12 -6 -1 171.12 4.43
12 -6 -1 172.6 4.85
12 -6 -1 173.13 4.22
12 -6 -1 165.53 4.27
12 -6 -1 171.48 3.73
-12 6 2 21.36 1.48
-12 6 2 20.21 1.62
-12 6 2 17.83 1.55
-12 6 2 18.63 0.85
-12 6 2 18.73 1.12
12 -6 -2 18.03 1.1
12 -6 -2 15.72 1.27
12 -6 -2 16.59 1.09
12 -6 -2 18.71 1.19
12 -6 -2 17.31 1.07
12 -6 -2 17.46 0.75
-12 6 3 31.85 1.7
-12 6 3 32.26 1.37
-12 6 3 28.76 1.78
-12 6 3 31.14 1.02
12 -6 -3 30.89 1.23
12 -6 -3 33.52 1.28
12 -6 -3 31.15 1.42
12 -6 -3 32.98 1.33
12 -6 -3 30.36 1.65
-12 6 4 19.35 0.87
-12 6 4 20.22 1.45
-12 6 4 21.23 1.15
-12 6 4 20.63 1.4
-12 6 4 20.67 1.57
12 -6 -4 14.05 1.07
12 -6 -4 19.07 0.96
12 -6 -4 17.62 1.29
-12 6 5 59.24 2.44
-12 6 5 61.89 1.73
-12 6 5 63.07 2.02
-12 6 5 65.29 2.37
-12 6 5 65.03 2.47
12 -6 -5 61.48 1.93
12 -6 -5 59.27 2.26
12 -6 -5 59.61 1.71
-12 6 6 46.34 2.09
-12 6 6 48.54 2.06
-12 6 6 49.11 1.74
-12 6 6 47.14 1.61
-12 6 6 48.29 2.28
12 -6 -6 43.4 1.89
12 -6 -6 43.27 1.53
-12 6 7 9.98 1.39
-12 6 7 11.36 1.26
-12 6 7 8.11 1.01
-12 6 7 7.82 0.94
-12 6 7 10.51 1.38
-12 6 8 12.31 1.44
-12 6 8 12.13 1.54
-12 6 8 12.52 1.57
-12 6 8 11.58 1.11
-12 6 9 10.25 1.58
-12 6 9 11.71 1.47
-12 6 10 17.49 2.31
-12 6 10 18.63 2.17
-12 6 10 17.82 1.88
-12 6 10 15.03 1.64
-12 6 11 9.77 2.58
-12 6 11 10.18 2.02
-12 6 11 6.22 2.11
11 -5 10 8.49 2.53
11 -5 10 7.45 2.74
11 -5 10 6.76 2.16
11 -5 10 5.37 2.08
-11 5 -9 9.27 1.59
11 -5 9 11 2.35
11 -5 9 8.18 1.88
11 -5 9 8.72 2
11 -5 9 7.29 1.97
11 -5 9 8.09 1.98
11 -5 9 9.14 2
-11 5 -8 7.91 1.31
-11 5 -8 5.65 2.18
-11 5 -8 2.75 1.59
11 -5 8 9.13 1.95
11 -5 8 6.11 1.96
11 -5 8 8.7 1.74
11 -5 8 7.29 1.8
11 -5 8 7.21 1.57
11 -5 8 6.53 1.62
-11 5 -7 1.98 1.67
-11 5 -7 2.26 0.95
11 -5 7 1.2 1.03
11 -5 7 2.68 1.27
11 -5 7 2.3 1.04
11 -5 7 1.06 1.21
11 -5 7 3.84 1.48
-11 5 -6 4.58 0.76
-11 5 -6 3.65 0.95
11 -5 6 2.62 1.2
11 -5 6 4.02 1.12
11 -5 6 2.48 1.04
11 -5 6 2.54 1
11 -5 6 3.58 1.19
-11 5 -5 32.54 1.43
-11 5 -5 33.88 1.99
-11 5 -5 30.8 2.34
-11 5 -5 31.39 1.66
11 -5 5 27.84 1.8
11 -5 5 32.54 1.96
11 -5 5 29.47 1.82
11 -5 5 30.09 2.15
11 -5 5 29.78 2.01
-11 5 -4 5.46 1.13
-11 5 -4 5.71 0.77
-11 5 -4 4.53 0.75
-11 5 -4 7.74 1.47
-11 5 -4 5.46 1.01
11 -5 4 5.41 0.95
11 -5 4 5.69 0.98
11 -5 4 4.5 0.91
11 -5 4 4.02 0.98
11 -5 4 5.21 1.03
-11 5 -3 32.34 1.81
-11 5 -3 26.56 1.95
-11 5 -3 30.36 1.46
-11 5 -3 30.48 1.94
11 -5 3 31.25 1.81
11 -5 3 26.45 1.71
11 -5 3 29.41 1.68
11 -5 3 30.54 1.51
11 -5 3 29.88 1.57
-11 5 -2 92.96 3.31
-11 5 -2 86.74 3.13
-11 5 -2 93.51 2.68
-11 5 -2 93.19 3.04
11 -5 2 99.58 2.88
11 -5 2 97.65 2.74
11 -5 2 96.36 3.07
11 -5 2 96.85 3.29
-11 5 -1 2.38 0.76
-11 5 -1 3.03 0.85
-11 5 -1 1.95 0.44
-11 5 -1 3.13 0.75
11 -5 1 3.24 0.75
11 -5 1 3.3 0.55
11 -5 1 2.63 0.6
11 -5 1 2.64 0.65
11 -5 1 2.62 0.62
11 -5 1 2.89 0.69
-11 5 0 70.62 2.02
-11 5 0 75.09 2.74
-11 5 0 70.99 2.59
-11 5 0 70.89 2.48
-11 5 0 72.17 2.18
11 -5 0 76 2.31
11 -5 0 76.81 2.38
11 -5 0 78.2 2.05
11 -5 0 75.23 2.67
11 -5 0 72.19 2.43
-11 5 1 32.7 1.35
-11 5 1 34.35 1.18
-11 5 1 32.57 1.62
-11 5 1 33.15 1.73
-11 5 1 34.23 1.78
11 -5 -1 30.85 1.37
11 -5 -1 32.47 1.42
11 -5 -1 33.51 1.46
11 -5 -1 33.74 1.11
11 -5 -1 32.65 1.63
-11 5 2 213.41 4.81
-11 5 2 210.66 5.25
-11 5 2 213.12 4.43
-11 5 2 218.62 5.62
11 -5 -2 220.05 5.58
11 -5 -2 215.97 4.85
11 -5 -2 210.03 5.03
11 -5 -2 217.77 4.92
11 -5 -2 215.18 4.43
-11 5 3 151.91 4.03
-11 5 3 153.68 3.34
-11 5 3 157.61 4.33
-11 5 3 158.36 3.7
-11 5 3 157.77 3.99
11 -5 -3 151.78 4.12
11 -5 -3 148.29 3.52
11 -5 -3 149.98 3.49
11 -5 -3 150.92 3.57
11 -5 -3 148.83 3.49
-11 5 4 48.9 1.93
-11 5 4 50.46 1.67
-11 5 4 47.67 1.86
-11 5 4 52.67 2.06
-11 5 4 50.66 1.45
11 -5 -4 51.15 1.99
11 -5 -4 51.77 1.69
11 -5 -4 50.05 1.45
-11 5 5 75.73 2.16
-11 5 5 76.57 2.61
-11 5 5 76.62 2.58
-11 5 5 76.29 2.4
-11 5 5 74.51 2.03
11 -5 -5 74.38 2.07
11 -5 -5 76.55 2.44
-11 5 6 12.28 1.28
-11 5 6 11.87 0.94
-11 5 6 13.26 1.16
-11 5 6 10.34 1.18
11 -5 -6 12.67 0.89
11 -5 -6 13.14 1.04
-11 5 7 67.15 2.27
-11 5 7 70.37 2.04
-11 5 7 67.77 2.7
-11 5 7 66.47 2.38
-11 5 8 9.07 1.3
-11 5 8 11 1.28
-11 5 8 9.38 1.23
-11 5 8 8.02 0.97
-11 5 9 8 1.13
-11 5 9 8.35 1.65
-11 5 9 9.7 1.62
-11 5 10 6.92 1.57
-11 5 10 8.14 1.87
-11 5 10 9.86 1.37
-11 5 11 8.64 1.97
-11 5 11 6.07 1.38
-11 5 11 9.9 2.37
-11 5 11 11.86 1.82
10 -4 10 7.1 2.05
10 -4 10 9.56 2.46
10 -4 10 6.58 2.29
10 -4 10 4.36 2.04
10 -4 10 2.83 1.92
-10 4 -9 12.8 1.57
-10 4 -9 12.74 2.55
10 -4 9 9.35 1.76
10 -4 9 9.35 1.98
10 -4 9 9.36 1.77
10 -4 9 11.58 1.88
10 -4 9 14.54 2.48
10 -4 9 8.86 1.67
-10 4 -8 2.15 1
-10 4 -8 4.62 1.37
-10 4 -8 1.34 1.53
10 -4 8 4.08 1.33
10 -4 8 3.55 1.59
10 -4 8 3.23 1.29
10 -4 8 2.88 1.36
10 -4 8 2.58 1.28
-10 4 -7 15.06 1.57
10 -4 7 16.45 1.62
10 -4 7 17.92 1.93
10 -4 7 19.19 1.97
10 -4 7 17.53 1.81
10 -4 7 16.82 2.18
-10 4 -6 13.24 1.8
-10 4 -6 9.5 1.24
10 -4 6 7.62 1.24
10 -4 6 9.42 1.39
10 -4 6 8.3 1.27
10 -4 6 8.52 1.19
10 -4 6 8.21 1.08
-10 4 -5 90.05 2.36
-10 4 -5 94.72 2.83
-10 4 -5 95.21 3.54
10 -4 5 87.82 3.27
10 -4 5 88.77 3.1
10 -4 5 89.82 2.83
10 -4 5 91.41 3.06
10 -4 5 96.43 3.46
-10 4 -4 44.61 2.21
-10 4 -4 43.1 1.91
-10 4 -4 41.84 1.69
-10 4 -4 41.53 1.43
-10 4 -4 40.01 2.19
10 -4 4 41.68 1.75
10 -4 4 40.73 1.81
10 -4 4 38.67 1.88
10 -4 4 41.47 2.02
10 -4 4 38.66 2.04
-10 4 -3 36.95 1.51
-10 4 -3 39.65 1.8
-10 4 -3 40.31 2.01
-10 4 -3 38.5 2.02
10 -4 3 35.95 1.81
10 -4 3 38.29 1.63
10 -4 3 35.89 1.57
10 -4 3 38.16 1.87
10 -4 3 37.84 1.75
-10 4 -2 15.12 0.97
-10 4 -2 16.53 1.4
-10 4 -2 15.16 1.3
-10 4 -2 16.23 1.25
10 -4 2 16.32 1.13
10 -4 2 15.91 1.23
10 -4 2 18.18 1.05
10 -4 2 17.06 1.08
10 -4 2 15.86 1.23
-10 4 -1 3.8 0.77
-10 4 -1 5.79 0.69
-10 4 -1 6.09 0.86
-10 4 -1 6.62 0.91
10 -4 1 4.84 0.68
10 -4 1 5.23 0.62
10 -4 1 4.74 0.65
10 -4 1 3.96 0.67
10 -4 1 4.59 0.71
-10 4 0 210.86 5.08
-10 4 0 210.72 5.42
-10 4 0 204.16 4.49
-10 4 0 206.14 4.64
-10 4 0 204.68 5.24
10 -4 0 207.16 5.36
10 -4 0 209.43 4.69
10 -4 0 206.82 4.46
-10 4 1 41.26 1.27
-10 4 1 43.34 1.45
-10 4 1 44.52 1.83
-10 4 1 39.85 1.65
-10 4 1 37.59 1.73
10 -4 -1 45.62 1.55
10 -4 -1 41.69 1.58
10 -4 -1 47.36 1.84
10 -4 -1 44.65 1.49
10 -4 -1 43.58 1.28
-10 4 2 19.14 1.23
-10 4 2 19.6 0.94
-10 4 2 18.87 0.81
-10 4 2 18.9 1.14
10 -4 -2 20.77 0.8
10 -4 -2 21.28 1.22
10 -4 -2 21.63 1.01
10 -4 -2 21.38 0.93
10 -4 -2 21.46 1.04
-10 4 3 34.66 1.46
-10 4 3 32.39 1.4
-10 4 3 33.79 1.09
-10 4 3 34.55 1.26
-10 4 3 35.16 1.57
10 -4 -3 34.08 1.26
10 -4 -3 35 1.07
10 -4 -3 34.4 1.12
10 -4 -3 34.12 1.48
10 -4 -3 33.64 1.12
-10 4 4 93.4 2.28
-10 4 4 91.84 2.74
-10 4 4 96.83 2.84
-10 4 4 90.63 2.59
-10 4 4 95.79 2.42
10 -4 -4 95.01 2.19
10 -4 -4 95.92 2.81
10 -4 -4 96.39 2.4
-10 4 5 70.3 2.13
-10 4 5 72.16 2.44
-10 4 5 74.14 2.02
-10 4 5 69.51 2.32
10 -4 -5 69.41 1.86
-10 4 6 37.79 1.87
-10 4 6 38.03 1.49
-10 4 6 38.9 1.4
-10 4 6 38.77 1.66
10 -4 -6 32.72 1.13
10 -4 -6 33.38 1.36
-10 4 7 35.17 1.88
-10 4 7 35.54 1.47
-10 4 7 32.48 1.62
-10 4 7 35.48 1.34
-10 4 8 6.99 0.87
-10 4 8 6.6 0.76
-10 4 8 6.12 1.21
-10 4 8 5.07 0.79
-10 4 9 7.23 1.37
-10 4 9 10.21 1.83
-10 4 9 8.88 1.06
-10 4 10 5.48 1.82
-10 4 10 3.16 1.45
-10 4 10 2.22 1.03
-10 4 11 9.04 2.32
-10 4 11 10.1 1.88
-10 4 11 9.95 1.49
-10 4 12 1.25 2.19
-10 4 12 -1.43 2.02
-10 4 12 2.02 2.42
9 -3 11 -3.47 2.38
9 -3 11 0.04 2.72
9 -3 11 -2.2 2.11
9 -3 11 1.33 1.78
-9 3 -10 1.23 1.33
9 -3 10 3.17 1.73
9 -3 10 -1.51 2.16
9 -3 10 0.93 1.55
9 -3 10 0.73 1.79
9 -3 10 2.29 1.62
9 -3 10 -0.16 1.37
-9 3 -9 9.96 1.3
-9 3 -9 6.71 2.1
-9 3 -9 8.23 1.45
9 -3 9 9.14 1.59
9 -3 9 13 1.83
9 -3 9 9.6 2.02
9 -3 9 9.4 1.64
9 -3 9 6.63 1.58
-9 3 -8 64.81 2.37
-9 3 -8 68.96 2.78
9 -3 8 68.31 3.04
9 -3 8 71.79 3.04
9 -3 8 68.07 3.12
9 -3 8 67.7 3.26
9 -3 8 78.33 3.67
-9 3 -7 50.94 2.95
-9 3 -7 54.89 2.06
9 -3 7 50.09 2.13
9 -3 7 53.9 2.55
9 -3 7 54.05 2.77
9 -3 7 51.33 2.43
9 -3 7 52.78 2.65
-9 3 -6 5.95 0.91
-9 3 -6 5.46 1.41
-9 3 -6 7.16 1.07
9 -3 6 5.57 0.93
9 -3 6 5.54 1.07
9 -3 6 5.15 1.03
9 -3 6 6.69 1.1
9 -3 6 5.01 1.16
-9 3 -5 3.74 0.7
-9 3 -5 5.26 1.12
9 -3 5 3.17 0.87
9 -3 5 3.07 0.7
9 -3 5 3.87 1.01
9 -3 5 2.67 0.71
9 -3 5 3.1 0.78
-9 3 -4 119.03 2.7
-9 3 -4 122.65 3.76
-9 3 -4 118.65 3.23
-9 3 -4 112.39 3.66
-9 3 -4 122.57 3.13
9 -3 4 123.54 3.49
9 -3 4 120.9 3.22
9 -3 4 130.98 3.85
9 -3 4 120.21 3.72
9 -3 4 127.86 3.56
-9 3 -3 237.05 6.04
-9 3 -3 238.75 5
-9 3 -3 242.96 6.16
-9 3 -3 241.75 5.29
-9 3 -3 239.5 5.66
9 -3 3 230.31 6.02
9 -3 3 241.61 5.3
9 -3 3 240.18 6
9 -3 3 239 5.71
-9 3 -2 108.14 3.24
-9 3 -2 104.72 2.95
-9 3 -2 101.71 2.68
9 -3 2 95.99 2.8
9 -3 2 97.59 2.99
9 -3 2 98.02 2.63
9 -3 2 95.57 2.92
9 -3 2 99.1 2.59
-9 3 -1 21.78 1.29
-9 3 -1 17.61 0.93
-9 3 -1 17.24 1.15
-9 3 -1 17.87 1.1
-9 3 -1 18.4 0.99
9 -3 1 20.01 1.13
9 -3 1 19.02 1.07
9 -3 1 25.64 1.47
9 -3 1 20.5 1.03
9 -3 1 18.84 0.94
-9 3 0 34.88 1.48
-9 3 0 34.34 1.4
-9 3 0 34.43 1.24
-9 3 0 31.98 1.51
-9 3 0 35.47 1.19
9 -3 0 31.46 1.09
9 -3 0 33.71 1.34
9 -3 0 29.36 1.18
9 -3 0 31.62 1.42
-9 3 1 369.03 7.4
-9 3 1 365.51 7.96
-9 3 1 360.62 7.23
-9 3 1 362.07 8.41
9 -3 -1 368.62 7.48
9 -3 -1 360.27 7.29
9 -3 -1 368.56 7.97
9 -3 -1 374.31 7.76
9 -3 -1 371.65 8.49
-9 3 2 201.12 5.03
-9 3 2 210.99 4.75
-9 3 2 206.38 4.22
-9 3 2 199.88 4.38
-9 3 2 199.71 4.58
9 -3 -2 217.44 5.3
9 -3 -2 220.6 4.65
9 -3 -2 218.29 4.85
9 -3 -2 215.05 4.64
-9 3 3 10.21 0.89
-9 3 3 9.12 0.67
-9 3 3 8.02 0.76
-9 3 3 8.71 0.64
-9 3 3 7.46 0.75
9 -3 -3 8.47 0.52
9 -3 -3 10.05 0.45
9 -3 -3 9.51 0.68
9 -3 -3 11.45 0.91
-9 3 4 130.44 3.45
-9 3 4 141.03 3.56
-9 3 4 129.49 3.21
-9 3 4 133.88 3.08
9 -3 -4 143.26 3.65
9 -3 -4 140.7 3.17
-9 3 5 1 0.49
-9 3 5 0.16 0.48
-9 3 5 0.89 0.4
-9 3 5 0.57 0.41
9 -3 -5 0.86 0.36
-9 3 6 18.12 1.16
-9 3 6 19.2 1.3
-9 3 6 20.86 0.99
-9 3 6 21.27 1.03
9 -3 -6 21.91 1.06
9 -3 -6 22.77 0.89
-9 3 7 1.42 0.63
-9 3 7 0.78 0.49
-9 3 7 1.43 0.53
-9 3 7 1.2 0.75
-9 3 8 32.15 1.51
-9 3 8 34.86 1.97
-9 3 8 33.6 2.21
-9 3 8 34.96 1.35
-9 3 8 33.77 1.21
-9 3 8 32.21 1.46
-9 3 9 33.09 1.6
-9 3 9 33.15 1.3
-9 3 9 29.9 2.47
-9 3 9 31.74 2.14
-9 3 10 6.8 1.1
-9 3 10 5.01 0.77
-9 3 10 4.4 0.81
-9 3 10 5.03 1.71
-9 3 10 7.57 1.58
-9 3 11 5.5 2.07
-9 3 11 2.05 1.64
-9 3 11 5.71 1.29
-9 3 12 2.6 2.05
-9 3 12 -0.69 1.95
-9 3 12 2.86 2.47
8 -2 11 6.83 2.08
8 -2 11 6.56 2.64
8 -2 11 3.07 1.89
8 -2 11 4.37 1.66
8 -2 11 6.89 2.21
8 -2 10 13.74 1.75
8 -2 10 11.54 1.75
8 -2 10 8.55 2
8 -2 10 14.64 1.86
8 -2 10 9.61 1.57
8 -2 10 13.31 2.38
-8 2 -9 1.36 1.83
-8 2 -9 2.93 0.94
-8 2 -9 5.47 1.16
8 -2 9 2.27 1.26
8 -2 9 -0.06 1.55
8 -2 9 0.62 1.3
8 -2 9 2.65 1.22
8 -2 9 3.31 1.21
-8 2 -8 11.7 1.27
8 -2 8 9.05 1.5
8 -2 8 10.25 1.33
8 -2 8 11.83 1.61
8 -2 8 11.76 1.9
8 -2 8 11.12 1.41
-8 2 -7 41.13 1.67
-8 2 -7 47.23 2.7
-8 2 -7 39.42 1.92
8 -2 7 47.41 2.39
8 -2 7 43.27 1.93
8 -2 7 41.17 2.06
8 -2 7 41.25 2.44
8 -2 7 40.76 2.07
-8 2 -6 136.77 3.62
-8 2 -6 136 3.39
8 -2 6 139.55 4.11
8 -2 6 143.01 4.41
8 -2 6 138.51 3.9
8 -2 6 142.36 4.14
8 -2 6 135.46 3.55
-8 2 -5 99.88 2.64
-8 2 -5 97.9 3.33
8 -2 5 96.07 2.62
8 -2 5 97.54 3.05
8 -2 5 92.91 2.99
8 -2 5 90.86 3.17
8 -2 5 90.81 2.83
-8 2 -4 63.92 2.38
-8 2 -4 59.77 2.25
8 -2 4 56.04 2.05
8 -2 4 55.93 2.09
8 -2 4 56.03 1.97
8 -2 4 54.83 1.78
8 -2 4 57.98 2.21
-8 2 -3 110.93 2.93
-8 2 -3 116.03 2.79
-8 2 -3 108.4 3.25
-8 2 -3 113.41 3.29
8 -2 3 105.06 3.1
8 -2 3 100.39 2.62
8 -2 3 99.89 2.85
8 -2 3 107.58 3.08
8 -2 3 106.65 2.85
-8 2 -2 348.4 7.9
-8 2 -2 333.61 8.03
-8 2 -2 355.06 7.08
-8 2 -2 350.31 7.56
-8 2 -2 341.43 7.25
8 -2 2 361.64 7.5
8 -2 2 359.14 7.88
8 -2 2 350.35 7.32
8 -2 2 368.64 8.18
8 -2 2 360.21 8.33
-8 2 -1 488.38 9.57
-8 2 -1 492.29 10.76
-8 2 -1 489.47 10.47
-8 2 -1 481.9 10.14
-8 2 -1 441.96 9.42
8 -2 1 491.15 10.39
8 -2 1 483.11 9.69
8 -2 1 489.18 9.75
8 -2 1 486.69 10.68
8 -2 1 503.02 10.99
-8 2 0 172.1 4.03
-8 2 0 169.07 4.13
-8 2 0 167.22 3.7
-8 2 0 172.02 3.67
8 -2 0 159.7 3.47
8 -2 0 163.26 4.07
8 -2 0 162.43 3.55
8 -2 0 157.17 3.81
-8 2 1 123.37 2.88
-8 2 1 126.52 2.84
-8 2 1 121.17 3.06
-8 2 1 127.4 3.29
-8 2 1 123.92 2.73
8 -2 -1 108.19 2.43
8 -2 -1 112.78 2.56
8 -2 -1 105.86 2.7
-8 2 2 37.54 1.2
-8 2 2 38 1.3
-8 2 2 37.28 1.42
-8 2 2 39.3 1.31
-8 2 2 39.09 1.13
8 -2 -2 40.09 1.25
8 -2 -2 41.23 1.03
8 -2 -2 42.08 1.26
8 -2 -2 42.08 1.5
-8 2 3 259.69 5.31
-8 2 3 255.05 6
-8 2 3 258.31 5.59
-8 2 3 257.82 5.66
8 -2 -3 258.77 6.1
8 -2 -3 263.22 5.38
8 -2 -3 270.07 5.49
-8 2 4 86.07 2.16
-8 2 4 81.55 2.39
-8 2 4 85.32 2.12
-8 2 4 85.75 2.46
8 -2 -4 78.4 1.92
8 -2 -4 76.4 2.21
-8 2 5 0.56 0.47
-8 2 5 0.31 0.36
-8 2 5 0.67 0.42
-8 2 5 0.53 0.36
8 -2 -5 0.96 0.36
-8 2 6 125.24 3.49
-8 2 6 125.6 3.01
-8 2 6 120.29 2.81
-8 2 6 124.72 3.32
-8 2 6 127.7 2.97
8 -2 -6 128.58 3.24
8 -2 -6 129.71 2.83
-8 2 7 1.54 0.51
-8 2 7 0.09 0.74
-8 2 7 0.71 0.5
-8 2 7 -0.24 0.59
-8 2 7 1.07 0.61
-8 2 7 1.17 0.44
8 -2 -7 0.85 0.43
-8 2 8 56.39 2.71
-8 2 8 51.97 1.94
-8 2 8 55.17 1.85
-8 2 8 54.15 1.75
-8 2 8 52.95 1.71
-8 2 8 53.68 2.33
-8 2 9 -0.08 0.6
-8 2 9 0.96 0.64
-8 2 9 1.15 0.73
-8 2 9 0.76 1.24
-8 2 9 0.43 0.69
-8 2 9 0.43 0.93
-8 2 10 9.91 1.22
-8 2 10 10.07 1.13
-8 2 10 9.32 1.15
-8 2 10 9.49 1.6
-8 2 10 11.22 2.02
-8 2 11 11.83 1.58
-8 2 11 11.68 2.32
-8 2 11 13.51 1.43
-8 2 11 19.57 2.47
-8 2 11 14.02 1.92
-8 2 12 2.62 2.14
-8 2 12 0.27 1.8
-8 2 12 0.35 2.4
7 -1 11 5.25 1.47
7 -1 11 2.61 2.15
7 -1 11 -0.72 2.26
7 -1 11 1.53 1.67
7 -1 11 5.4 1.85
7 -1 10 2.23 1.16
7 -1 10 2.23 1.46
7 -1 10 2.68 1.31
7 -1 10 1.82 1.57
7 -1 10 2.22 1.78
7 -1 9 15.6 1.62
7 -1 9 17.76 2.24
7 -1 9 15.6 1.74
7 -1 9 15.04 1.69
7 -1 9 18.6 2.43
-7 1 -8 3.47 1.42
-7 1 -8 3.44 0.71
7 -1 8 2.59 1.07
7 -1 8 3.9 0.99
7 -1 8 3.95 0.9
7 -1 8 3.14 1.22
7 -1 8 4.46 0.91
-7 1 -7 37.04 1.63
-7 1 -7 38.83 1.46
-7 1 -7 41.12 2.42
7 -1 7 39.12 1.9
7 -1 7 43.05 2.39
7 -1 7 40.8 1.87
7 -1 7 42.61 2.26
7 -1 7 41.1 1.66
-7 1 -6 97.72 2.66
-7 1 -6 94.63 2.48
-7 1 -6 97.53 3.39
7 -1 6 93.95 3.26
7 -1 6 95 2.58
7 -1 6 92.54 2.92
7 -1 6 90.58 3.12
7 -1 6 94.25 2.81
-7 1 -5 62.68 2.43
-7 1 -5 61.36 1.78
7 -1 5 63.79 1.91
7 -1 5 66.5 2.23
7 -1 5 62.59 2.09
7 -1 5 66.02 2.46
7 -1 5 65.82 2.35
-7 1 -4 71.31 2.32
-7 1 -4 71.97 2.45
-7 1 -4 72.55 1.93
7 -1 4 64.48 2.29
7 -1 4 63.69 2
7 -1 4 66.78 2.16
7 -1 4 65.22 2.18
7 -1 4 67.68 1.86
-7 1 -3 98.46 2.91
-7 1 -3 106.02 2.91
-7 1 -3 101.25 2.5
7 -1 3 107.39 3.08
7 -1 3 109.61 2.91
7 -1 3 112.35 2.65
7 -1 3 109.51 2.86
7 -1 3 115.16 3.07
-7 1 -2 405.22 7.98
-7 1 -2 400.11 8.24
-7 1 -2 397.72 8.86
-7 1 -2 408.44 8.49
-7 1 -2 401.46 9.05
7 -1 2 397.42 8.47
7 -1 2 396.58 8.14
7 -1 2 396.52 8.78
7 -1 2 409.09 8.98
7 -1 2 393.24 7.91
-7 1 -1 210.35 4.98
-7 1 -1 234.38 4.35
-7 1 -1 200.02 4.48
-7 1 -1 223.46 5.16
-7 1 -1 223.39 4.64
-7 1 -1 214.67 4.83
7 -1 1 215.24 4.5
7 -1 1 220.39 5.05
7 -1 1 206.39 4.86
7 -1 1 208.04 4.73
7 -1 1 208.71 4.41
-7 1 0 134.24 2.94
-7 1 0 134.25 2.95
-7 1 0 132.31 3.37
-7 1 0 133.01 2.86
-7 1 0 131.67 3.24
-7 1 0 137.16 3.19
7 -1 0 133.2 2.95
7 -1 0 133.72 2.94
7 -1 0 131.25 3.17
7 -1 0 138.97 3.4
-7 1 1 495.96 10.45
-7 1 1 493.79 10.03
-7 1 1 509.43 9.82
-7 1 1 503.34 9.79
-7 1 1 527.76 11.08
7 -1 -1 495.82 10.09
7 -1 -1 512.16 9.86
7 -1 -1 541.09 11.17
7 -1 -1 498.11 10.49
7 -1 -1 502.62 9.87
-7 1 2 160.36 3.66
-7 1 2 159.58 3.65
-7 1 2 163.85 3.49
-7 1 2 169.21 3.96
-7 1 2 161.5 3.45
7 -1 -2 136.04 3.19
7 -1 -2 160.95 3.59
7 -1 -2 140.98 3.1
7 -1 -2 136.73 3.27
-7 1 3 221.23 4.95
-7 1 3 223.09 4.65
-7 1 3 226.02 5.23
-7 1 3 226.39 4.85
7 -1 -3 220.41 4.89
7 -1 -3 219.03 4.61
7 -1 -3 222.46 4.56
7 -1 -3 223.49 5.15
-7 1 4 128.44 3.35
-7 1 4 132.53 3
-7 1 4 135.69 3.07
-7 1 4 135.41 3.35
7 -1 -4 138.92 3.44
7 -1 -4 141.98 3.05
7 -1 -4 134.43 3.43
-7 1 5 68.61 1.83
-7 1 5 68.43 2.16
-7 1 5 67.11 1.82
-7 1 5 67.3 2.06
7 -1 -5 67.31 1.72
7 -1 -5 65.49 2.14
-7 1 6 31.14 1.52
-7 1 6 33.89 1.78
-7 1 6 30.86 1.37
-7 1 6 31.05 1.18
-7 1 6 31.95 1.23
7 -1 -6 35.19 1.15
7 -1 -6 33.37 1.6
7 -1 -6 33.25 1.3
-7 1 7 33.47 1.5
-7 1 7 32.58 1.33
-7 1 7 33.02 1.32
-7 1 7 34.32 2
-7 1 7 31.21 1.66
7 -1 -7 32.3 1.09
7 -1 -7 31.47 1.71
7 -1 -7 32 1.11
-7 1 8 18.77 1.36
-7 1 8 19.53 1.19
-7 1 8 26.3 1.99
-7 1 8 20.25 1.57
-7 1 8 21.78 1.25
-7 1 9 -0.57 0.82
-7 1 9 1.23 0.79
-7 1 9 1.86 0.79
-7 1 9 1.69 0.81
-7 1 9 2.14 1.16
-7 1 10 11.28 1.57
-7 1 10 12.23 1.54
-7 1 10 15.07 1.43
-7 1 10 15.03 2.02
-7 1 10 15.85 1.88
-7 1 11 -1.26 1.33
-7 1 11 4.12 1.85
-7 1 11 1.56 1.13
-7 1 11 0.15 1.08
-7 1 11 1.63 1.16
-7 1 12 6.7 1.91
-7 1 12 4.92 2.4
-7 1 12 4.1 1.19
6 0 11 10.46 1.81
6 0 11 7.14 1.68
6 0 11 8.7 2.23
6 0 11 12.79 2.41
6 0 10 3.74 1.9
6 0 10 4.7 1.21
6 0 10 2.12 1.56
6 0 10 2.02 0.98
6 0 9 3.34 0.79
6 0 9 3.59 0.88
6 0 9 4.21 1.08
6 0 9 3.61 0.87
6 0 9 2.74 1.39
6 0 9 2.55 1.33
6 0 8 3.61 0.87
6 0 8 4.46 0.91
6 0 8 4.53 1.13
6 0 8 4.87 0.87
6 0 8 4.55 1.17
-6 0 -7 35.3 2.24
6 0 7 40.65 1.43
6 0 7 40.63 1.73
6 0 7 41.49 1.73
6 0 7 42.22 2.26
6 0 7 39.12 1.69
6 0 7 39.87 2.14
-6 0 -6 2.54 0.58
-6 0 -6 4.31 1.02
-6 0 -6 2.31 0.45
6 0 6 2.7 0.63
6 0 6 2.91 0.8
6 0 6 3.41 0.85
6 0 6 2.84 0.47
6 0 6 2.4 0.51
6 0 6 1.86 0.58
-6 0 -5 35.7 1.29
-6 0 -5 38.44 1.81
-6 0 -5 36.46 1.18
6 0 5 36.49 1.26
6 0 5 37.22 1.71
6 0 5 36.13 1.45
6 0 5 37.56 1.4
6 0 5 37.61 1.73
-6 0 -4 159.9 4.18
-6 0 -4 161.89 3.46
-6 0 -4 162.18 4
6 0 4 160.06 4.27
6 0 4 180.02 3.64
6 0 4 159.65 3.85
6 0 4 166.76 4.09
6 0 4 167.36 4.12
-6 0 -3 71.79 1.74
-6 0 -3 65.75 2.1
-6 0 -3 72.4 2.05
6 0 3 67.07 1.84
6 0 3 73.45 2.03
6 0 3 71.28 1.74
6 0 3 66.52 2.02
6 0 3 64.02 2.07
-6 0 -2 1.31 0.39
-6 0 -2 1.13 0.43
-6 0 -2 1.65 0.32
-6 0 -2 1.7 0.42
6 0 2 1.18 0.31
6 0 2 1.8 0.4
6 0 2 1.3 0.35
6 0 2 1.56 0.39
6 0 2 1.45 0.42
-6 0 -1 29.76 0.95
-6 0 -1 31.66 1.01
-6 0 -1 29.84 1.12
-6 0 -1 30.95 1.06
-6 0 -1 31.01 1.05
6 0 1 30.44 1.04
6 0 1 30.23 1.12
6 0 1 30.45 0.95
6 0 1 31.47 1.05
6 0 1 31.16 1.05
-6 0 0 564.03 12.55
-6 0 0 696.75 12.7
-6 0 0 669.29 13.43
-6 0 0 711.2 14.19
6 0 0 693.62 13.41
6 0 0 703.23 14.21
6 0 0 702.19 13.33
-6 0 1 691.78 14.14
-6 0 1 749.47 15.05
-6 0 1 781.4 15.92
-6 0 1 752.84 14.21
-6 0 1 747.99 14.5
6 0 -1 777.83 16.27
6 0 -1 747 14.83
-6 0 2 144.23 3.21
-6 0 2 142.22 3.24
-6 0 2 141.63 2.95
-6 0 2 142.58 3.46
-6 0 2 143.98 3.09
6 0 -2 146.18 3.15
6 0 -2 138.53 2.93
6 0 -2 142.39 3.05
6 0 -2 137.44 3.43
6 0 -2 144.84 3.22
-6 0 3 3.65 0.53
-6 0 3 4.29 0.5
-6 0 3 4.51 0.48
-6 0 3 4.26 0.33
-6 0 3 4.64 0.59
6 0 -3 4.77 0.62
6 0 -3 4.65 0.6
6 0 -3 4.53 0.5
6 0 -3 4.79 0.4
-6 0 4 64.44 2
-6 0 4 67.48 1.66
-6 0 4 67.13 1.79
-6 0 4 67.95 2.01
-6 0 4 69.67 1.82
6 0 -4 70.61 1.8
6 0 -4 69.89 2.06
6 0 -4 68.33 2.02
-6 0 5 191.03 4.38
-6 0 5 196.47 4.35
-6 0 5 203.74 4.47
-6 0 5 195.44 4.83
-6 0 5 205.01 4.73
-6 0 5 206.22 5.2
6 0 -5 200.47 4.7
6 0 -5 199.09 4.79
6 0 -5 199.9 4.24
-6 0 6 75.9 2.47
-6 0 6 85 2.61
-6 0 6 91.95 3.03
-6 0 6 82.66 2.28
-6 0 6 86.44 2.28
6 0 -6 81.43 2.11
6 0 -6 84.17 2.57
-6 0 7 2.17 0.82
-6 0 7 1.78 0.58
-6 0 7 2.43 0.91
-6 0 7 2.33 0.66
-6 0 7 2.14 0.58
6 0 -7 1.07 0.68
6 0 -7 2.56 0.5
6 0 -7 2.36 0.53
-6 0 8 9.65 1.27
-6 0 8 10.07 1.1
-6 0 8 9.25 1.15
-6 0 8 9.06 1.02
-6 0 8 8.14 1.31
-6 0 8 8.18 1.17
6 0 -8 9.06 1.22
6 0 -8 7.9 0.86
6 0 -8 9.59 0.81
-6 0 9 13.72 1.64
-6 0 9 11.84 1.36
-6 0 9 13.99 1.42
-6 0 9 12.29 1.34
-6 0 9 15.86 2.11
6 0 -9 13.21 1.69
-6 0 10 13.19 1.53
-6 0 10 12.73 1.71
-6 0 10 15.34 1.85
-6 0 10 13.77 1.68
-6 0 10 15.46 1.5
-6 0 10 15.96 2.07
-6 0 11 -0.39 1.05
-6 0 11 -0.14 0.99
-6 0 11 0.86 1.35
-6 0 11 -0.11 1.78
-6 0 11 -1.63 1.18
-6 0 11 -0.11 1.23
-6 0 12 4.9 1.91
-6 0 12 3.34 2.52
-6 0 12 2.7 1.53
-6 0 12 5.84 1.88
5 1 11 2.09 1.28
5 1 11 -0.06 1.88
5 1 11 -0.38 1.92
5 1 11 -1.05 1.39
5 1 10 13.86 1.5
5 1 10 12.87 1.9
5 1 10 11.53 1.46
5 1 10 13.93 2.2
5 1 9 20.86 1.57
5 1 9 18.15 2.2
5 1 9 21.11 1.35
5 1 9 22.66 2.23
5 1 8 4.2 0.71
5 1 8 5.43 0.75
5 1 8 5 0.86
5 1 8 4.55 1.07
5 1 8 4.31 0.69
5 1 8 5.07 1.25
5 1 7 19.04 1.08
5 1 7 18.5 1.06
5 1 7 17.62 1.08
5 1 7 18.59 1.62
5 1 7 16.55 1.52
5 1 7 16.4 1.11
5 1 6 3.02 0.52
5 1 6 2.02 0.67
5 1 6 2.84 0.58
5 1 6 2.92 0.54
5 1 6 3.1 0.46
5 1 6 2.52 0.74
-5 -1 -5 77.1 2.52
5 1 5 76.14 1.93
5 1 5 79.54 2.56
5 1 5 78.86 2.15
5 1 5 76.23 2
5 1 5 77.35 2.49
5 1 5 77.49 1.88
-5 -1 -4 21.42 1.17
-5 -1 -4 24.36 0.76
5 1 4 27.45 1.03
5 1 4 23.46 1.2
5 1 4 24.39 0.86
5 1 4 26.94 1.26
5 1 4 25.76 0.85
5 1 4 24.87 0.9
-5 -1 -3 103.72 2.59
-5 -1 -3 107.72 2.76
-5 -1 -3 106.69 2.27
5 1 3 117.77 2.88
5 1 3 118.06 2.92
5 1 3 117.67 3
5 1 3 105.89 2.61
5 1 3 130.7 2.56
-5 -1 -2 161.72 3.24
-5 -1 -2 157.74 3.54
-5 -1 -2 148.77 3.59
-5 -1 -2 164.65 3.67
5 1 2 161.78 3.74
5 1 2 154.69 3.51
5 1 2 167.55 3.36
5 1 2 172.06 3.82
5 1 2 164.87 3.63
-5 -1 -1 32.94 0.95
-5 -1 -1 34.94 1.1
-5 -1 -1 32.4 0.94
-5 -1 -1 33.7 1.07
5 1 1 38.33 1.16
5 1 1 38.54 1.05
5 1 1 36.65 1.1
5 1 1 41.52 1.22
5 1 1 39.52 0.95
5 1 1 38.92 1.04
-5 -1 0 148.63 3.16
-5 -1 0 152.25 3.17
-5 -1 0 155.21 3.56
-5 -1 0 149.68 3.33
-5 -1 0 153.64 3.19
5 1 0 168.7 3.6
5 1 0 155.91 3.8
5 1 0 167.75 3.4
5 1 0 163.82 3.4
5 1 0 165.99 3.59
-5 -1 1 33.57 1.03
-5 -1 1 33.12 1
-5 -1 1 32.75 1.04
-5 -1 1 32.55 1.02
-5 -1 1 32.82 0.94
-5 -1 1 33.02 1.14
5 1 -1 36.01 1.09
5 1 -1 36.04 1.07
5 1 -1 36.45 1.09
5 1 -1 37.27 1.23
5 1 -1 35.8 1
-5 -1 2 973.45 19.82
-5 -1 2 1000 20.95
5 1 -2 950.27 18.52
-5 -1 3 115.57 2.67
-5 -1 3 111.39 2.9
-5 -1 3 109.01 2.97
-5 -1 3 110 2.75
-5 -1 3 110.22 2.61
5 1 -3 130.38 3.17
5 1 -3 122.23 2.8
5 1 -3 122.66 2.8
5 1 -3 118.96 2.95
-5 -1 4 291.84 6.99
-5 -1 4 301.93 6.19
-5 -1 4 295.45 6.34
-5 -1 4 299.66 6.4
-5 -1 4 295.55 6.44
-5 -1 4 302.37 6.87
5 1 -4 299.76 6.42
5 1 -4 296.92 6.11
-5 -1 5 60.1 2.01
-5 -1 5 60.89 2.3
-5 -1 5 59.29 1.83
-5 -1 5 60.22 1.98
-5 -1 5 58.45 1.77
-5 -1 5 63.81 1.81
5 1 -5 61.23 1.76
5 1 -5 60.07 1.97
5 1 -5 58.87 1.95
-5 -1 6 77.33 2.44
-5 -1 6 74.77 2.21
-5 -1 6 79.38 2.5
-5 -1 6 80.05 2.29
-5 -1 6 78.66 2.28
-5 -1 6 76.6 2.83
5 1 -6 78.89 2.17
5 1 -6 77.46 2.47
5 1 -6 79.69 2.12
-5 -1 7 82.46 2.44
-5 -1 7 84.4 2.73
-5 -1 7 83.35 2.52
-5 -1 7 76.08 2.63
-5 -1 7 82.99 3.19
-5 -1 7 83.89 2.51
5 1 -7 83.56 2.32
5 1 -7 87.27 2.74
5 1 -7 83.05 2.25
-5 -1 8 23.71 1.96
-5 -1 8 21.14 1.55
-5 -1 8 24.43 1.47
-5 -1 8 22.56 1.5
-5 -1 8 23.74 1.56
5 1 -8 21.72 1.15
5 1 -8 23.54 1.66
5 1 -8 19.46 1.23
-5 -1 9 16.56 1.55
-5 -1 9 14.42 1.54
-5 -1 9 10.87 1.42
-5 -1 9 15.19 2.03
-5 -1 9 12.42 1.51
-5 -1 9 12.76 1.41
5 1 -9 15.56 1.1
5 1 -9 14.06 1.66
-5 -1 10 4.11 1.1
-5 -1 10 6.26 1.33
-5 -1 10 4.33 1.14
-5 -1 10 4.57 1.12
-5 -1 10 2.87 1.57
-5 -1 10 5.12 1.23
5 1 -10 5.66 1.4
-5 -1 11 8.12 2.26
-5 -1 11 5.52 1.43
-5 -1 11 6.08 1.45
-5 -1 11 6.59 1.43
-5 -1 11 3.43 1.54
-5 -1 11 6.52 1.5
-5 -1 11 4.08 1.52
-5 -1 12 8.85 2.13
-5 -1 12 3.64 1.85
-5 -1 12 6.99 1.75
-5 -1 12 10.26 2.61
-5 -1 12 6.34 1.45
4 2 11 4.77 1.95
4 2 11 0.07 1.9
4 2 11 2.06 1.28
4 2 11 -0.45 1.15
4 2 11 -0.17 1.61
4 2 11 0.96 1.1
4 2 10 15.93 2.2
4 2 10 14.47 2.13
4 2 10 16.27 1.57
4 2 10 12.09 1.64
4 2 9 2.81 0.81
4 2 9 1.49 1.13
4 2 9 2.33 1.15
4 2 9 2.86 0.82
4 2 8 12.65 1.65
4 2 8 9.65 1.29
4 2 8 9.83 1.08
4 2 8 10.74 1.08
4 2 7 4.8 0.95
4 2 7 4.9 1.01
4 2 7 4.31 0.72
4 2 6 24.66 1.1
4 2 6 23.23 1.48
4 2 6 26.58 1.51
4 2 5 68.83 1.87
4 2 5 68.95 2.29
4 2 5 69.89 2.24
4 2 4 29.37 1.27
4 2 4 29.84 1.28
4 2 4 29.45 1.02
4 2 3 139.89 3.13
4 2 3 135.06 3.2
4 2 3 140.26 2.78
4 2 3 131.4 3.28
-4 -2 -2 137.23 2.84
-4 -2 -2 143.41 3.21
-4 -2 -2 140.69 3.14
4 2 2 133.81 3.25
4 2 2 128.81 3.04
4 2 2 132.65 3.01
4 2 2 139.68 3.12
4 2 2 140.87 2.78
-4 -2 -1 9.78 0.65
-4 -2 -1 10.29 0.47
-4 -2 -1 10.08 0.58
-4 -2 -1 10.26 0.44
-4 -2 -1 9.24 0.58
4 2 1 10.01 0.52
4 2 1 9.69 0.58
4 2 1 11.49 0.54
4 2 1 9.43 0.63
4 2 1 9.52 0.57
-4 -2 0 379.86 7.91
-4 -2 0 397.53 8.42
-4 -2 0 397.3 8.02
-4 -2 0 387.83 7.53
-4 -2 0 370.55 7.93
-4 -2 0 381.59 7.5
4 2 0 380.03 8.25
4 2 0 378.93 7.86
4 2 0 388 7.37
4 2 0 373.54 7.55
4 2 0 361.84 7.36
4 2 0 385.55 7.79
-4 -2 1 204.96 4.21
-4 -2 1 208.39 4.68
-4 -2 1 202.12 4.35
-4 -2 1 192.77 4.42
-4 -2 1 199.26 4.28
-4 -2 1 198.81 4.36
4 2 -1 193.48 4.1
4 2 -1 183.62 4.01
4 2 -1 189.66 4.39
4 2 -1 182.62 4.09
4 2 -1 188.29 3.94
-4 -2 2 672.16 13.42
-4 -2 2 641.27 13.9
-4 -2 2 661.26 12.77
-4 -2 2 677.37 14.25
-4 -2 2 650.5 13.44
-4 -2 2 652.46 13.06
4 2 -2 714.81 13.89
4 2 -2 706.84 14.74
4 2 -2 675.19 13.48
4 2 -2 652.9 14.34
4 2 -2 677.23 13.16
4 2 -2 666.6 13.87
-4 -2 3 5.11 0.69
-4 -2 3 4.75 0.63
-4 -2 3 5.2 0.58
-4 -2 3 4.77 0.57
-4 -2 3 4.64 0.66
-4 -2 3 3.93 0.51
4 2 -3 5.26 0.68
4 2 -3 6.73 0.69
4 2 -3 5.24 0.64
4 2 -3 5.72 0.51
-4 -2 4 152.87 3.6
-4 -2 4 148.91 3.61
-4 -2 4 152.1 4.08
-4 -2 4 156.28 3.96
-4 -2 4 151.73 3.63
-4 -2 4 155 3.7
4 2 -4 146.53 3.45
4 2 -4 150.64 3.6
4 2 -4 149.82 3.84
-4 -2 5 15.57 0.99
-4 -2 5 15.8 1.24
-4 -2 5 15.61 1.03
-4 -2 5 17.72 1.15
-4 -2 5 16.14 0.97
-4 -2 5 16.78 1.01
4 2 -5 16.42 1.09
4 2 -5 18.1 1.03
-4 -2 6 171.76 4.49
-4 -2 6 170.8 4.12
-4 -2 6 164.63 4.17
-4 -2 6 167.08 4.22
-4 -2 6 165.63 4.1
-4 -2 6 165.89 4.8
4 2 -6 164.55 4.16
4 2 -6 164.8 3.94
4 2 -6 170.78 3.87
-4 -2 7 35.96 1.8
-4 -2 7 36.86 1.64
-4 -2 7 34.81 1.72
-4 -2 7 37.14 1.75
-4 -2 7 37.72 2.14
4 2 -7 38.31 1.63
4 2 -7 40.75 1.85
4 2 -7 38.07 1.51
-4 -2 8 5.46 0.94
-4 -2 8 6.95 1.09
-4 -2 8 7.39 1.42
-4 -2 8 4.92 0.94
-4 -2 8 4.22 1.03
4 2 -8 5.11 0.77
4 2 -8 5.96 0.91
4 2 -8 5.84 1.11
-4 -2 9 5.98 1.12
-4 -2 9 6.72 1.27
-4 -2 9 4.28 1.13
-4 -2 9 6.34 1.21
-4 -2 9 4.99 1.51
-4 -2 9 6.54 1.1
4 2 -9 7.6 0.93
4 2 -9 7.28 1.21
-4 -2 10 7.39 1.46
-4 -2 10 10.88 1.56
-4 -2 10 8.1 1.37
-4 -2 10 11.86 2.15
-4 -2 10 8.38 1.48
-4 -2 10 8.5 1.44
-4 -2 10 9.06 1.45
4 2 -10 7.95 1.56
4 2 -10 8.87 1.03
4 2 -10 10.44 1.17
-4 -2 11 8.63 1.7
-4 -2 11 6.87 1.37
-4 -2 11 6.79 1.6
-4 -2 11 10.81 1.81
-4 -2 11 11.05 1.65
-4 -2 11 8.19 2.09
-4 -2 11 6.97 1.72
-4 -2 12 1.57 2.6
-4 -2 12 2 2.16
-4 -2 12 -0.72 1.51
-4 -2 12 0.3 1.83
-4 -2 12 0.9 1.85
3 3 11 5.12 1.31
3 3 11 3.84 2.04
3 3 11 0.4 1.55
3 3 11 2.58 1.84
3 3 10 4.09 1.68
3 3 10 2.66 1.51
3 3 10 2.55 1.09
3 3 10 4.8 1.3
3 3 9 15.41 2.06
3 3 9 16.11 1.49
3 3 9 15.34 1.73
3 3 9 16.7 1.83
3 3 8 63.69 2.82
3 3 8 65.53 2.61
3 3 8 62.8 2.21
3 3 8 61.37 2.63
3 3 7 34.35 1.81
3 3 7 33.46 1.9
3 3 7 35.01 1.78
3 3 7 33.09 1.48
3 3 6 13.67 1.18
3 3 6 9.79 1.08
3 3 6 11.97 0.91
3 3 6 10.43 1.11
3 3 5 24.55 1.29
3 3 5 24.99 1.09
3 3 5 22.93 1.26
3 3 5 24.81 1.24
3 3 4 110.2 2.8
3 3 4 112.33 2.93
3 3 4 109.04 2.99
3 3 3 84.08 2.13
3 3 3 87.27 2.36
3 3 3 79.22 2.15
-3 -3 -2 36.25 1.07
-3 -3 -2 34.85 1.28
-3 -3 -2 36.78 1.12
-3 -3 -2 35.13 0.96
3 3 2 33.54 1.03
3 3 2 33.1 1.04
3 3 2 33.66 1.23
-3 -3 -1 117.6 2.56
-3 -3 -1 118.45 2.88
-3 -3 -1 116.78 2.54
-3 -3 -1 122.3 2.88
3 3 1 134.88 2.83
3 3 1 134.5 3.19
3 3 1 134.79 3.2
3 3 1 131.82 2.88
3 3 1 133.8 3.02
3 3 1 134.38 2.96
-3 -3 0 5.51 0.61
-3 -3 0 5.66 0.59
-3 -3 0 6.24 0.5
-3 -3 0 6.06 0.59
-3 -3 0 6.74 0.45
3 3 0 5.8 0.61
3 3 0 6.5 0.59
3 3 0 6.69 0.43
3 3 0 7.42 0.55
-3 -3 1 52.14 1.54
-3 -3 1 50.49 1.51
-3 -3 1 55.39 1.7
-3 -3 1 55.38 1.58
-3 -3 1 49.26 1.6
-3 -3 1 58.99 1.6
3 3 -1 56.47 1.62
3 3 -1 60.83 1.82
3 3 -1 57.19 1.65
3 3 -1 55.44 1.65
3 3 -1 56.97 1.63
3 3 -1 67.08 1.73
-3 -3 2 85.34 2.29
-3 -3 2 85 2.28
-3 -3 2 84.72 2.49
-3 -3 2 90.94 2.45
-3 -3 2 91.88 2.31
-3 -3 2 89.45 2.31
3 3 -2 83.76 2.28
3 3 -2 88.29 2.29
3 3 -2 87.47 2.29
3 3 -2 88.52 2.27
3 3 -2 90.58 2.43
3 3 -2 89.26 2.5
-3 -3 3 63.61 1.9
-3 -3 3 69.33 2.15
-3 -3 3 67.91 1.98
-3 -3 3 62.96 1.93
-3 -3 3 62.66 2.11
-3 -3 3 68.37 1.95
3 3 -3 66.34 1.89
3 3 -3 65.43 2.16
3 3 -3 67.81 1.98
3 3 -3 69.69 2
3 3 -3 71.72 2.17
-3 -3 4 228.74 5.55
-3 -3 4 226.97 5.11
-3 -3 4 224.5 5.14
-3 -3 4 217.21 5.58
-3 -3 4 219.12 5.18
-3 -3 4 226.28 5.07
3 3 -4 217.76 4.91
3 3 -4 214.45 5.48
3 3 -4 216.56 4.98
3 3 -4 229.27 4.85
-3 -3 5 3.21 0.61
-3 -3 5 3.77 0.76
-3 -3 5 2.07 0.68
-3 -3 5 2.8 0.65
-3 -3 5 2.67 0.6
-3 -3 5 2.62 0.65
3 3 -5 3.23 0.66
3 3 -5 2.85 0.83
3 3 -5 2.96 0.65
3 3 -5 3.18 0.6
-3 -3 6 41.64 1.78
-3 -3 6 38.64 1.88
-3 -3 6 41.22 1.74
-3 -3 6 38.89 2.07
-3 -3 6 41.86 1.7
3 3 -6 40.38 1.74
3 3 -6 40.6 1.7
-3 -3 7 28.82 1.59
-3 -3 7 28.93 2.01
-3 -3 7 29.43 1.63
-3 -3 7 29.7 1.79
-3 -3 7 27.81 1.67
3 3 -7 24.73 1.55
3 3 -7 27.4 1.37
3 3 -7 28.48 1.64
-3 -3 8 61.74 3.1
-3 -3 8 54.82 2.35
-3 -3 8 63.33 2.47
-3 -3 8 63.33 2.64
-3 -3 8 60.59 2.61
-3 -3 8 63.55 2.72
-3 -3 8 67.89 2.6
3 3 -8 64.2 2.35
3 3 -8 64.26 2.18
3 3 -8 65.08 2.56
-3 -3 9 23.62 2.02
-3 -3 9 22.38 1.86
-3 -3 9 19.75 1.73
-3 -3 9 23.08 2.54
-3 -3 9 23.09 2
-3 -3 9 20.48 1.99
-3 -3 9 20.12 2
3 3 -9 20.32 1.46
3 3 -9 15.63 1.46
3 3 -9 20.06 1.87
-3 -3 10 -0.27 1.59
-3 -3 10 1.77 1.33
-3 -3 10 0.67 1.33
-3 -3 10 -0.01 1.1
-3 -3 10 1.67 1.28
-3 -3 10 1.54 1.29
-3 -3 10 2.46 1.3
3 3 -10 2.48 0.96
3 3 -10 2.66 1.35
3 3 -10 1.06 1.06
-3 -3 11 6.2 1.75
-3 -3 11 3.8 2.21
-3 -3 11 5.24 1.72
-3 -3 11 3.98 1.49
-3 -3 11 5.64 1.91
-3 -3 11 6.41 1.56
-3 -3 11 5.9 1.59
3 3 -11 6.27 1.29
-3 -3 12 5.01 1.8
-3 -3 12 6.95 2.19
-3 -3 12 4.88 2.27
-3 -3 12 5.11 1.95
-3 -3 12 4.84 2.97
2 4 11 8.09 1.98
2 4 11 12.46 1.64
2 4 11 11.31 1.86
2 4 11 12.55 2.43
2 4 10 12.85 1.63
2 4 10 13.11 1.95
2 4 10 15.13 1.81
2 4 10 17.07 1.87
2 4 9 12.81 1.76
2 4 9 15.03 1.65
2 4 9 12.23 1.52
2 4 9 13.66 1.5
2 4 8 29.84 1.65
2 4 8 28.94 1.8
2 4 8 29.48 1.99
2 4 8 31.05 1.92
2 4 7 19.96 1.58
2 4 7 18.03 1.42
2 4 7 19.3 1.29
2 4 7 20.58 1.46
2 4 6 159.96 3.96
2 4 6 157.79 4.33
2 4 6 161.62 4.07
2 4 6 164.61 4.28
2 4 5 190.29 4.4
2 4 5 188.2 4.4
2 4 5 184.67 4.7
2 4 5 192.08 4.7
2 4 4 186.33 4.16
2 4 4 187.12 4.46
2 4 4 186.52 4.52
2 4 3 184.35 4.36
2 4 3 180.37 3.91
2 4 3 183.05 3.71
-2 -4 -2 323.28 6.39
-2 -4 -2 319.63 7.05
-2 -4 -2 325.82 7.1
2 4 2 331.2 6.79
2 4 2 328.72 7.19
2 4 2 348.9 6.51
2 4 2 305.74 6.42
2 4 2 324.53 7.12
2 4 2 319.9 6.72
-2 -4 -1 286.73 6.36
-2 -4 -1 268.78 5.83
-2 -4 -1 293.02 5.91
-2 -4 -1 274.81 5.52
-2 -4 -1 283.02 6.18
2 4 1 285.34 5.81
2 4 1 287.18 5.58
2 4 1 275.06 6.05
2 4 1 288.37 6.26
2 4 1 278.09 6.1
2 4 1 279 6.01
2 4 1 298.65 6.45
-2 -4 0 41.59 1.42
-2 -4 0 43.86 1.26
-2 -4 0 42.33 1.39
-2 -4 0 41.64 1.28
-2 -4 0 41.94 1.12
-2 -4 0 42.32 1.48
-2 -4 0 42.58 1.4
2 4 0 40.33 1.4
2 4 0 38.53 1.26
2 4 0 40.66 1.22
2 4 0 39.6 1.36
2 4 0 39.51 1.32
2 4 0 39.31 1.4
-2 -4 1 282.77 6.13
-2 -4 1 278.51 6.57
-2 -4 1 280.86 6.27
-2 -4 1 278.41 6.21
-2 -4 1 283.36 5.97
-2 -4 1 285.1 6.29
2 4 -1 287.57 6.67
2 4 -1 283.05 6.04
2 4 -1 285.57 6.25
2 4 -1 290.9 6.4
2 4 -1 288.91 6.33
-2 -4 2 33.53 1.36
-2 -4 2 33.24 1.45
-2 -4 2 31.2 1.36
-2 -4 2 32.48 1.35
-2 -4 2 35.49 1.29
-2 -4 2 33.9 1.33
2 4 -2 33.03 1.22
2 4 -2 32.87 1.29
2 4 -2 31.04 1.26
2 4 -2 31.19 1.32
2 4 -2 31.07 1.34
-2 -4 3 119.37 3.12
-2 -4 3 114.76 3.2
-2 -4 3 117.31 3.05
-2 -4 3 117.59 3.36
-2 -4 3 121.45 3.09
-2 -4 3 116.83 3.09
-2 -4 3 114.39 3.3
2 4 -3 119.74 3.37
2 4 -3 120.29 3.12
2 4 -3 119.81 3.05
2 4 -3 121.41 3
2 4 -3 120.79 3.08
-2 -4 4 66.78 2.09
-2 -4 4 64.06 2.06
-2 -4 4 65.88 2.21
-2 -4 4 66.87 2.38
-2 -4 4 59.5 2.25
-2 -4 4 59.12 2.09
2 4 -4 62.37 1.93
2 4 -4 63.82 2.33
2 4 -4 59.36 1.99
2 4 -4 59.01 2.05
-2 -4 5 51.25 2.15
-2 -4 5 53.33 1.92
-2 -4 5 50.23 2.22
-2 -4 5 54.44 2.04
-2 -4 5 51.24 2.05
-2 -4 5 51.6 1.92
2 4 -5 53.44 2.34
2 4 -5 57.61 2.07
2 4 -5 54.38 1.98
-2 -4 6 43.21 1.87
-2 -4 6 45.37 1.99
-2 -4 6 45.02 2.28
-2 -4 6 42.86 2.11
-2 -4 6 44.9 1.88
-2 -4 6 45.24 2.04
2 4 -6 40.99 1.82
2 4 -6 44.92 1.92
2 4 -6 41.91 1.74
2 4 -6 44.71 2.33
-2 -4 7 3.69 0.96
-2 -4 7 1.87 0.79
-2 -4 7 2.62 0.88
-2 -4 7 1.41 0.93
-2 -4 7 1.65 0.93
-2 -4 7 1.01 0.81
-2 -4 7 2.52 1.02
2 4 -7 1.1 0.82
-2 -4 8 17.65 1.69
-2 -4 8 15.31 1.81
-2 -4 8 15.83 1.56
-2 -4 8 17.79 2.11
-2 -4 8 16.81 1.86
-2 -4 8 16.85 1.81
-2 -4 8 16.77 1.79
2 4 -8 12.88 1.59
2 4 -8 15.29 1.3
-2 -4 9 7.58 1.53
-2 -4 9 5.55 1.45
-2 -4 9 2.57 1.23
-2 -4 9 4.54 1.37
-2 -4 9 4.1 1.22
-2 -4 9 4.79 1.32
-2 -4 9 4.6 1.58
2 4 -9 3.71 1.22
2 4 -9 5.29 1.3
2 4 -9 6.37 1.05
-2 -4 10 6.64 2.06
-2 -4 10 7.66 1.71
-2 -4 10 6.53 1.64
-2 -4 10 9.47 1.54
-2 -4 10 9.51 1.81
-2 -4 10 10.3 1.7
-2 -4 10 7.97 1.59
2 4 -10 7.96 1.65
2 4 -10 6.42 1.43
2 4 -10 9.73 1.33
-2 -4 11 4.74 1.67
-2 -4 11 3.84 1.94
-2 -4 11 7.08 1.81
-2 -4 11 7.65 1.94
-2 -4 11 6.98 1.95
-2 -4 11 -0.3 2.34
-2 -4 12 4.59 3.23
-2 -4 12 0.15 1.99
-2 -4 12 5.63 2.58
-2 -4 12 3.23 3.06
1 5 11 9.52 1.76
1 5 11 6.87 1.88
1 5 11 8.55 2.26
1 5 11 6.16 1.94
1 5 10 0.42 1.47
1 5 10 2.15 1.21
1 5 10 -0.06 1.19
1 5 10 2.37 1.38
1 5 9 4.94 1.15
1 5 9 7.43 1.41
1 5 9 11.05 1.41
1 5 9 5.61 1.2
1 5 8 10.51 1.42
1 5 8 12.4 1.41
1 5 8 13.07 1.38
1 5 8 12.11 1.61
1 5 7 139.32 4.11
1 5 7 136.95 3.75
1 5 7 134.17 3.9
1 5 7 141.33 3.79
1 5 6 41.21 1.69
1 5 6 42.01 1.88
1 5 6 41.7 1.8
1 5 6 39.52 1.72
1 5 5 65.27 1.98
1 5 5 64.89 2.17
1 5 5 67.67 2.23
1 5 4 87.19 2.27
1 5 4 94.97 2.66
-1 -5 -3 87.72 2.51
-1 -5 -3 85.41 2.19
-1 -5 -3 83.06 2.21
1 5 3 81.66 2.01
1 5 3 84.36 1.93
1 5 3 81.09 2.38
1 5 3 77.46 1.99
1 5 3 83.44 1.95
1 5 3 82.75 1.97
-1 -5 -2 573.19 11.15
-1 -5 -2 592 12.72
-1 -5 -2 583.74 12.28
-1 -5 -2 584.53 12.64
1 5 2 553.91 11.52
1 5 2 571.39 11.79
1 5 2 548.43 11.41
1 5 2 558.36 10.92
1 5 2 555.9 10.8
1 5 2 557.49 10.65
-1 -5 -1 197.52 3.95
-1 -5 -1 203.28 4.8
-1 -5 -1 190.87 4.29
-1 -5 -1 199.24 4.64
-1 -5 -1 198.09 4.38
1 5 1 203.59 4.62
1 5 1 197.58 4.52
1 5 1 200.16 4.4
1 5 1 200.3 4.27
1 5 1 194.87 4.47
1 5 1 202.83 4.7
-1 -5 0 148.74 3.77
-1 -5 0 142.08 3.57
-1 -5 0 143.24 3.4
-1 -5 0 143.01 3.52
-1 -5 0 141.04 3.46
1 5 0 143.61 3.51
1 5 0 143.82 3.56
1 5 0 147.17 3.69
1 5 0 149.96 3.67
1 5 0 151.16 3.39
1 5 0 149.12 3.52
-1 -5 1 75.46 2.37
-1 -5 1 72.22 2.1
-1 -5 1 70.74 2.14
-1 -5 1 73.33 2.2
-1 -5 1 73.18 2.23
1 5 -1 72.9 2.02
1 5 -1 71.43 2.08
1 5 -1 72.01 2.27
1 5 -1 70.79 2.15
1 5 -1 70.45 2.15
1 5 -1 73.54 2.19
-1 -5 2 71.53 2.45
-1 -5 2 73.04 2.35
-1 -5 2 74.02 2.33
-1 -5 2 75.81 2.3
1 5 -2 77.72 2.36
1 5 -2 75.67 2.17
1 5 -2 75.79 2.29
1 5 -2 72.83 2.21
1 5 -2 76.48 2.3
1 5 -2 76.47 2.41
-1 -5 3 360.65 8.07
-1 -5 3 361.16 8.39
-1 -5 3 361.33 8.2
-1 -5 3 361.44 7.99
-1 -5 3 352.23 8.53
1 5 -3 360.86 7.53
1 5 -3 351.78 7.69
1 5 -3 351.36 8.29
1 5 -3 361.27 7.71
-1 -5 4 10.13 1.19
-1 -5 4 9.05 1.06
-1 -5 4 9.19 1.01
-1 -5 4 10.84 1.11
-1 -5 4 11.06 1.15
1 5 -4 10.5 0.92
1 5 -4 12.19 1.3
1 5 -4 9.49 1.13
1 5 -4 11.05 1.09
-1 -5 5 36.04 1.96
-1 -5 5 39.61 1.88
-1 -5 5 40.75 1.79
-1 -5 5 39.28 1.92
-1 -5 5 38.2 2
1 5 -5 43.49 1.94
1 5 -5 41.9 1.81
1 5 -5 41.75 1.71
1 5 -5 39.81 2.13
-1 -5 6 11.94 1.47
-1 -5 6 11.63 1.54
-1 -5 6 9.56 1.25
-1 -5 6 12.43 1.36
-1 -5 6 11.49 1.38
-1 -5 6 10.05 1.4
1 5 -6 9.19 1.11
1 5 -6 12.43 1.6
1 5 -6 10.46 1.28
1 5 -6 11.69 1.43
-1 -5 7 49.74 2.72
-1 -5 7 51.53 2.43
-1 -5 7 47.13 2.54
-1 -5 7 48.68 2.43
-1 -5 7 48.97 2.28
-1 -5 7 46.84 2.58
1 5 -7 50.2 2.24
1 5 -7 44.47 2.04
-1 -5 8 16.65 2.16
-1 -5 8 14.97 1.82
-1 -5 8 9.13 1.47
-1 -5 8 13.08 1.75
-1 -5 8 14.47 1.77
-1 -5 8 14.12 1.65
1 5 -8 14.98 1.61
-1 -5 9 -0.29 1.3
-1 -5 9 2.99 1.56
-1 -5 9 -0.51 1.13
-1 -5 9 1.89 1.62
-1 -5 9 0.87 1.29
-1 -5 9 1.86 1.3
1 5 -9 2.09 1.19
1 5 -9 1.5 0.98
1 5 -9 -0.29 1.17
-1 -5 10 10.29 1.85
-1 -5 10 9.87 2.19
-1 -5 10 14.18 2.03
-1 -5 10 9.01 1.92
-1 -5 10 10.32 1.99
-1 -5 10 9.58 1.97
1 5 -10 11.34 1.83
1 5 -10 8.75 1.51
-1 -5 11 0.8 1.84
-1 -5 11 -1.77 2.19
-1 -5 11 -0.35 2
-1 -5 11 -4.92 2.27
0 6 11 1.78 1.63
0 6 11 1.03 1.87
0 6 11 0.87 2.08
0 6 11 1.47 1.74
0 6 10 4.27 1.39
0 6 10 1.12 1.6
0 6 10 3.14 1.41
0 6 10 4.32 1.35
0 6 9 19.7 2.16
0 6 9 21.17 1.91
0 6 9 20.16 1.84
0 6 9 19.72 1.95
0 6 8 1.91 0.91
0 6 8 1.82 0.93
0 6 8 2.77 0.95
0 6 8 2.18 1.08
0 6 7 5.68 1.02
0 6 7 4.72 0.83
0 6 7 5.94 0.98
0 6 7 6.04 1.08
0 6 6 22.36 1.23
0 6 6 23.14 1.47
0 6 6 22.96 1.43
0 6 6 20.65 1.39
0 6 5 87.56 2.68
0 6 5 87.62 2.31
0 -6 -4 123.79 3.41
0 6 4 115.41 2.65
0 6 4 110.74 2.59
0 6 4 111.66 2.62
0 6 4 115.04 2.53
0 6 4 111.95 2.7
0 6 4 113.22 3.14
0 -6 -3 55.04 1.74
0 -6 -3 55.47 1.94
0 6 3 57.65 1.76
0 6 3 58.11 1.97
0 6 3 59.91 1.61
0 6 3 58.7 1.75
0 6 3 58.03 1.42
0 6 3 56.81 1.63
0 -6 -2 23.12 1.23
0 -6 -2 22.88 1.16
0 -6 -2 24.94 1.26
0 6 2 21.71 1.05
0 6 2 21.74 1.12
0 6 2 20.58 0.91
0 6 2 20.79 1.09
0 6 2 20.96 0.95
0 6 2 23.31 1.19
0 -6 -1 109.93 2.64
0 -6 -1 105.69 2.25
0 -6 -1 108.08 3.12
0 -6 -1 107.24 2.72
0 -6 -1 106.9 3.05
0 -6 -1 105.76 2.94
0 6 1 116.34 3.08
0 6 1 113.32 3.06
0 6 1 111.99 2.93
0 6 1 113.41 2.76
0 6 1 107.95 2.85
0 6 1 110.68 2.93
0 -6 0 383.29 8.42
0 -6 0 380.15 8.28
0 -6 0 388.41 8.51
0 -6 0 390.86 9.06
0 -6 0 391.74 8.94
0 -6 0 376.41 8.5
0 6 0 361.35 8.05
0 6 0 366.66 7.5
0 6 0 368.79 7.7
0 6 0 363.09 8.1
0 6 0 359.89 8.08
0 6 0 350.59 7.87
0 -6 1 112.6 3.15
0 -6 1 113.36 3.09
0 -6 1 111.83 3.32
0 -6 1 114.28 3.15
0 -6 1 104.3 3.35
0 -6 1 113.54 3.01
0 6 -1 111.03 3.12
0 6 -1 113.35 3.16
0 6 -1 113.31 2.91
0 6 -1 111.55 3.02
0 6 -1 112.49 3.24
0 6 -1 114.27 3.12
0 -6 2 22.74 1.25
0 -6 2 23.96 1.36
0 -6 2 25.12 1.32
0 -6 2 23.53 1.45
0 6 -2 20.07 1.13
0 6 -2 24.05 1.34
0 6 -2 19.96 1.37
0 6 -2 23.27 1.15
0 6 -2 23.13 1.38
0 6 -2 22.04 1.38
0 6 -2 24.5 1.3
0 -6 3 53.47 2.29
0 -6 3 53.72 1.99
0 -6 3 56.32 2.19
0 -6 3 54.05 2.11
0 -6 3 51.44 2.13
0 -6 3 54.66 2.27
0 6 -3 58.4 2.21
0 6 -3 56.53 1.94
0 6 -3 56.98 2.3
0 6 -3 55.26 2.05
0 -6 4 118.25 3.53
0 -6 4 117.5 3.74
0 -6 4 121.96 3.82
0 -6 4 117.01 3.62
0 -6 4 120.86 3.45
0 -6 4 119.11 3.88
0 6 -4 113.64 3.26
0 6 -4 118.86 3.45
0 6 -4 111.64 3.15
0 6 -4 114.72 3.68
0 -6 5 89.25 3.31
0 -6 5 93.86 3.33
0 -6 5 92.12 3.18
0 -6 5 98.42 3.04
0 -6 5 88.5 3.07
0 -6 5 84.93 3.32
0 6 -5 95.4 3.42
0 6 -5 89.19 3.01
0 6 -5 84.85 2.83
0 6 -5 90.46 2.78
0 -6 6 27.32 1.82
0 -6 6 28.45 1.99
0 -6 6 27.13 1.89
0 -6 6 25.48 1.95
0 -6 6 25.5 1.82
0 -6 6 26.48 2.04
0 6 -6 22.08 1.85
0 6 -6 22.89 1.68
0 6 -6 20.76 2
0 6 -6 22.29 1.47
0 -6 7 5.59 1.41
0 -6 7 7.64 1.38
0 -6 7 6.55 1.31
0 -6 7 7.57 1.36
0 -6 7 7.25 1.2
0 -6 7 8.13 1.5
0 6 -7 4.72 1.25
0 6 -7 4.73 0.91
0 6 -7 5.23 1.12
0 -6 8 5.1 1.18
0 -6 8 2.36 1.18
0 -6 8 1.7 1.32
0 -6 8 3.35 1.44
0 -6 8 1.67 1.27
0 -6 8 2.9 1.28
0 6 -8 3.63 1.06
0 6 -8 4.79 1.25
0 -6 9 24.69 2.57
0 -6 9 17.55 1.99
0 -6 9 19.08 2.32
0 -6 9 21.2 2.75
0 -6 9 20.27 2.84
0 -6 9 22.12 2.69
0 6 -9 17.59 2.68
0 6 -9 15.27 1.92
0 6 -9 21.48 2.36
0 -6 10 1.03 1.8
0 -6 10 1.39 1.71
0 -6 10 -0.71 1.73
0 -6 10 -1.2 1.88
0 -6 10 3.55 1.77
0 -6 10 4.17 2.01
0 6 -10 3.52 1.45
0 6 -10 1.94 1.77
0 -6 11 -0.77 1.98
0 -6 11 1.45 2.48
0 -6 11 2.56 2.2
-1 7 11 0.72 1.8
-1 7 11 -2.56 1.78
-1 7 11 2.69 2.26
-1 7 11 -0.53 1.64
-1 7 10 9.43 1.92
-1 7 10 8.76 1.69
-1 7 10 8.53 1.59
-1 7 10 8.25 1.54
-1 7 9 2.19 1.11
-1 7 9 2.05 1.34
-1 7 9 -0.91 1.03
-1 7 9 1.86 1.16
-1 7 8 8.58 1.22
-1 7 8 9.34 1.42
-1 7 8 10.57 1.37
-1 7 8 8.29 1.17
-1 7 7 10.29 1.27
-1 7 7 9.82 1.25
-1 7 7 10.42 1.3
-1 7 7 9.63 1.16
-1 7 6 10.69 1.01
-1 7 6 12.15 1.26
-1 7 5 86.36 2.22
-1 7 5 87.48 2.36
-1 7 5 88.89 2.21
-1 7 5 89.66 2.78
-1 7 5 87.76 2.11
-1 7 5 89.25 2.25
1 -7 -4 17.97 1.03
1 -7 -4 20.24 1.06
1 -7 -4 20.9 1.37
-1 7 4 19.52 1.14
-1 7 4 20.54 0.93
-1 7 4 18.77 1.25
-1 7 4 22.06 0.99
-1 7 4 20.41 1.11
1 -7 -3 60.46 2.01
1 -7 -3 58.16 2.11
1 -7 -3 57.15 2.01
-1 7 3 63.23 2.18
-1 7 3 66.13 1.92
-1 7 3 63.96 2.08
-1 7 3 64.96 1.85
1 -7 -2 95.88 2.88
1 -7 -2 90.24 2.24
1 -7 -2 93.5 2.82
1 -7 -2 96.76 2.82
1 -7 -2 89.13 2.19
-1 7 2 88.38 2.62
-1 7 2 90.35 2.69
-1 7 2 93.3 2.42
-1 7 2 88.53 2.48
-1 7 2 92.32 2.61
-1 7 2 90.4 2.72
1 -7 -1 117.28 3.01
1 -7 -1 116.72 3.39
1 -7 -1 120.43 2.94
1 -7 -1 112.65 3.42
1 -7 -1 111.03 3.23
-1 7 1 116.35 2.95
-1 7 1 112.74 3.22
-1 7 1 117.49 3.19
-1 7 1 117.36 3.31
-1 7 1 114.88 3.05
-1 7 1 113.91 3.14
1 -7 0 180.18 4.38
1 -7 0 182.94 4.85
1 -7 0 183.78 4.52
1 -7 0 181.15 4.94
1 -7 0 184.14 4.63
1 -7 0 176.64 4.52
-1 7 0 174.56 4.33
-1 7 0 182.45 4.18
-1 7 0 176.74 4.48
-1 7 0 172.62 4.36
-1 7 0 172.25 4.47
-1 7 0 173.46 4.58
1 -7 1 128.3 3.77
1 -7 1 127.47 3.55
1 -7 1 120.54 3.35
1 -7 1 122.46 3.47
1 -7 1 122.85 3.5
-1 7 -1 131.72 3.8
-1 7 -1 135.21 3.68
-1 7 -1 132.32 3.71
-1 7 -1 129.93 3.53
-1 7 -1 129.41 3.62
-1 7 -1 130.14 3.39
1 -7 2 139.62 4.1
1 -7 2 133.91 3.87
1 -7 2 136.13 3.71
1 -7 2 133.6 4.17
1 -7 2 137.51 3.84
1 -7 2 135.92 3.88
-1 7 -2 139.6 3.84
-1 7 -2 134.33 3.95
-1 7 -2 137 3.82
-1 7 -2 135.76 3.97
-1 7 -2 137.1 3.57
1 -7 3 58.73 2.33
1 -7 3 56.04 2.19
1 -7 3 56.21 2.32
1 -7 3 61.44 2.53
1 -7 3 55.98 2.51
-1 7 -3 65.82 2.41
-1 7 -3 62.72 2.5
-1 7 -3 63.85 2.2
-1 7 -3 64.01 2.59
1 -7 4 88.78 3.19
1 -7 4 86.54 3.29
1 -7 4 86.25 3.32
1 -7 4 90.33 3.17
1 -7 4 89.9 3.1
-1 7 -4 86.08 2.75
-1 7 -4 90.73 3.1
-1 7 -4 87.62 2.87
-1 7 -4 82.86 3.22
1 -7 5 92.34 3.59
1 -7 5 90.67 3.54
1 -7 5 98.26 3.22
1 -7 5 92.3 3.46
1 -7 5 94.55 3.4
1 -7 5 90.89 3.28
-1 7 -5 98.14 3.41
-1 7 -5 103.04 3.75
-1 7 -5 91.47 3.13
-1 7 -5 93.64 2.99
1 -7 6 24.03 2.11
1 -7 6 20.42 1.96
1 -7 6 25.03 2.12
1 -7 6 22.53 2.17
1 -7 6 23.83 1.9
1 -7 6 24.16 1.98
-1 7 -6 21.71 1.55
-1 7 -6 22.2 2.04
-1 7 -6 22.82 2.25
-1 7 -6 25.35 1.87
1 -7 7 9.15 1.64
1 -7 7 11.39 1.8
1 -7 7 12.29 1.63
1 -7 7 9.9 1.55
1 -7 7 12.58 1.91
1 -7 7 10.88 1.78
-1 7 -7 14.92 1.88
-1 7 -7 12.67 1.41
-1 7 -7 13.75 1.82
1 -7 8 1.8 1.32
1 -7 8 2.11 1.41
1 -7 8 2.2 1.52
1 -7 8 0.29 1.36
1 -7 8 2.57 1.72
1 -7 8 2.43 1.49
-1 7 -8 2.45 1.67
-1 7 -8 1.65 1.26
-1 7 -8 2.02 1.06
-1 7 -8 2.57 1.39
1 -7 9 7.13 2
1 -7 9 11.6 2.23
1 -7 9 8.05 1.9
1 -7 9 9.77 2.15
1 -7 9 9.77 1.86
1 -7 9 12.28 2.1
-1 7 -9 13.42 1.91
-1 7 -9 6.97 1.5
1 -7 10 0.88 2.04
1 -7 10 -0.1 1.85
1 -7 10 -0.14 1.97
1 -7 10 -2.07 2.02
1 -7 11 0.02 2.48
1 -7 11 1.56 2.64
1 -7 11 0.51 2.51
1 -7 11 -4.05 3.05
-2 8 10 11.04 1.71
-2 8 10 11.07 2.04
-2 8 10 7.36 1.75
-2 8 10 8.09 1.54
-2 8 9 -0.79 1.4
-2 8 9 0.8 1.17
-2 8 9 -0.16 1.38
-2 8 9 -1.51 1.05
-2 8 8 10.9 1.36
-2 8 8 8.22 1.26
-2 8 8 10.79 1.71
-2 8 8 9.15 1.49
-2 8 7 6.29 0.84
-2 8 7 7 1.16
-2 8 7 6.8 1.18
-2 8 7 5.38 1.08
-2 8 6 17.24 1.03
-2 8 6 17.59 1.3
-2 8 6 17.73 1.49
-2 8 5 24.45 1.24
-2 8 5 24.13 1.07
-2 8 5 23.92 1.42
-2 8 5 25.64 1.53
-2 8 5 21.69 1.15
2 -8 -4 16.2 1.19
2 -8 -4 14.58 1.16
2 -8 -4 13.98 1.37
-2 8 4 18.59 1.26
-2 8 4 18.31 1.32
-2 8 4 17.15 1
-2 8 4 21.13 1.11
-2 8 4 18.04 1.34
2 -8 -3 74.08 2.56
2 -8 -3 76.31 2.52
2 -8 -3 71.96 2.55
-2 8 3 67.15 2.38
-2 8 3 69.31 2.06
-2 8 3 69.07 2.31
-2 8 3 69.77 2.13
-2 8 3 70.48 2.42
-2 8 3 68.9 2.4
2 -8 -2 26.57 1.56
2 -8 -2 25.63 1.53
2 -8 -2 25.63 1.02
2 -8 -2 24.96 1.56
2 -8 -2 25.55 1.08
-2 8 2 26.01 1.58
-2 8 2 24.73 1.22
-2 8 2 26.64 1.28
-2 8 2 25.87 1.47
-2 8 2 23.83 1.47
-2 8 2 25.34 1.48
2 -8 -1 39.68 1.87
2 -8 -1 38.48 1.52
2 -8 -1 38.25 1.49
2 -8 -1 37.84 1.83
2 -8 -1 38.41 1.9
-2 8 1 43.07 1.82
-2 8 1 42.18 1.61
-2 8 1 40.09 1.8
-2 8 1 41.38 1.67
-2 8 1 43.22 1.99
-2 8 1 42.93 1.9
2 -8 0 5.78 1.05
2 -8 0 5.69 1
2 -8 0 4.43 0.87
2 -8 0 5.97 0.8
2 -8 0 6.82 0.92
-2 8 0 7.54 1.08
-2 8 0 7.23 0.98
-2 8 0 8.75 1.14
-2 8 0 6.57 0.86
-2 8 0 5.82 0.75
-2 8 0 5.1 0.86
2 -8 1 133.04 4.22
2 -8 1 135.83 3.75
2 -8 1 136.19 4.18
2 -8 1 139.29 3.95
2 -8 1 134.57 3.87
2 -8 1 139.15 3.9
-2 8 -1 139.88 3.97
-2 8 -1 141.78 4
-2 8 -1 141.49 4.07
-2 8 -1 140.15 3.84
-2 8 -1 136.44 3.66
-2 8 -1 141.93 4.18
2 -8 2 146.66 4.15
2 -8 2 141.63 4.13
2 -8 2 139.03 4.37
2 -8 2 142.11 4.13
2 -8 2 139.74 4.46
2 -8 2 139.94 3.94
-2 8 -2 142.78 4.31
-2 8 -2 145.06 4.19
-2 8 -2 147.82 3.88
-2 8 -2 145.56 4.16
-2 8 -2 144.94 4.31
2 -8 3 24.63 1.66
2 -8 3 25.79 1.72
2 -8 3 24.29 1.66
2 -8 3 26.08 1.9
2 -8 3 26.65 1.82
2 -8 3 26.03 1.94
-2 8 -3 25.81 1.75
-2 8 -3 26.04 1.94
-2 8 -3 26.82 1.94
-2 8 -3 28.53 1.52
2 -8 4 14.65 1.53
2 -8 4 12.48 1.46
2 -8 4 14.54 1.54
2 -8 4 13.81 1.82
2 -8 4 14.32 1.6
2 -8 4 11.61 1.66
-2 8 -4 15.07 1.61
-2 8 -4 16.4 1.79
-2 8 -4 13.81 1.84
-2 8 -4 14.08 1.23
2 -8 5 36.19 2.22
2 -8 5 37.87 2.66
2 -8 5 39.46 2.32
2 -8 5 42.64 2.47
2 -8 5 41.93 2.52
2 -8 5 39.73 2.4
-2 8 -5 38.12 2.19
-2 8 -5 42.48 2
-2 8 -5 44.99 2.56
-2 8 -5 44.22 2.71
2 -8 6 85.38 3.35
2 -8 6 82.47 3.76
2 -8 6 90.33 3.77
2 -8 6 84.33 3.86
2 -8 6 84.9 3.52
2 -8 6 83.08 3.5
-2 8 -6 85.89 3.01
-2 8 -6 86.39 3.25
-2 8 -6 88.4 3.95
-2 8 -6 88 3.54
2 -8 7 31.16 2.67
2 -8 7 29.56 2.71
2 -8 7 29.59 2.83
2 -8 7 32.46 2.53
2 -8 7 26.54 2.72
2 -8 7 28.08 2.64
-2 8 -7 23.91 2.53
-2 8 -7 26.51 1.9
-2 8 -7 29.88 2.28
2 -8 8 4.57 1.6
2 -8 8 6.73 1.96
2 -8 8 3.66 1.73
2 -8 8 3.75 1.95
2 -8 8 5.39 1.7
2 -8 8 6.86 1.82
-2 8 -8 3.44 1.72
-2 8 -8 3.6 1.57
-2 8 -8 5.49 1.33
-2 8 -8 5.11 2.16
2 -8 9 2.05 2.01
2 -8 9 4.13 1.81
2 -8 9 4.08 2.02
2 -8 9 6.33 2.31
2 -8 9 7.92 2.26
-2 8 -9 5.66 1.55
2 -8 10 4.56 2.28
2 -8 10 9.11 2.38
2 -8 10 3.8 2.43
2 -8 10 5.15 2.64
-2 8 -10 3.74 2.48
-3 9 10 0.71 1.22
-3 9 10 -1.54 1.52
-3 9 10 -1.46 1.94
-3 9 10 1.64 1.9
-3 9 9 13.14 1.89
-3 9 9 11.63 1.19
-3 9 9 14.86 2
-3 9 9 12.27 1.64
-3 9 8 20.29 1.37
-3 9 8 19.46 2.17
-3 9 8 21.93 1.89
-3 9 8 22.71 2.43
-3 9 7 4.3 1.28
-3 9 7 3.45 1.01
-3 9 7 3.37 1.04
-3 9 6 12.19 1.3
-3 9 6 14.01 1.46
-3 9 6 10.94 0.96
-3 9 6 13.41 1.11
-3 9 6 10.8 1.1
3 -9 -5 10.15 1.37
3 -9 -5 8.16 0.95
3 -9 -5 8.85 0.92
-3 9 5 8.04 1.2
-3 9 5 9.03 0.96
-3 9 5 8.92 1.03
-3 9 5 9 1.17
-3 9 5 8.38 1.05
3 -9 -4 58.68 2.4
3 -9 -4 50.09 2.15
-3 9 4 54.56 1.97
-3 9 4 58.03 2.22
-3 9 4 57.59 2.36
-3 9 4 56.34 2.26
-3 9 4 55.62 2.4
-3 9 4 57.74 1.93
3 -9 -3 25.98 1.69
3 -9 -3 23.79 1.58
3 -9 -3 25.7 1.73
-3 9 3 26.9 1.34
-3 9 3 25.45 1.65
-3 9 3 27.04 1.73
-3 9 3 29.79 1.65
-3 9 3 26.82 1.76
-3 9 3 27.25 1.38
3 -9 -2 29.04 1.75
3 -9 -2 30.29 1.25
3 -9 -2 29.11 1.83
3 -9 -2 29.63 1.21
3 -9 -2 29.67 1.81
-3 9 2 29.6 1.77
-3 9 2 30.51 1.67
-3 9 2 29.47 1.43
-3 9 2 31.63 1.91
-3 9 2 31.46 1.52
-3 9 2 30.96 1.76
3 -9 -1 69.51 2.77
3 -9 -1 75.42 2.84
3 -9 -1 71.54 2.71
3 -9 -1 73.86 2.33
3 -9 -1 73.38 2.36
-3 9 1 72.6 2.68
-3 9 1 71.03 2.81
-3 9 1 73.38 2.36
-3 9 1 69.95 2.58
-3 9 1 71.24 2.43
-3 9 1 70.41 2.67
3 -9 0 5.76 0.9
3 -9 0 6.38 0.98
3 -9 0 6.16 1.06
3 -9 0 8.21 1.21
3 -9 0 8.37 1.25
-3 9 0 9.08 1.01
-3 9 0 5.51 1.1
-3 9 0 8.78 1.2
-3 9 0 7.61 1.12
-3 9 0 6.98 1.26
3 -9 1 41.48 2.14
3 -9 1 42.12 1.99
3 -9 1 39.35 2.21
3 -9 1 41.13 1.98
3 -9 1 43.91 2.02
3 -9 1 39.89 2.27
-3 9 -1 41.23 2.14
-3 9 -1 37.27 1.96
-3 9 -1 35.32 2.23
-3 9 -1 37.09 1.74
-3 9 -1 37.04 2.18
3 -9 2 2.44 0.86
3 -9 2 2.16 0.81
3 -9 2 0.63 0.96
3 -9 2 3.32 0.91
3 -9 2 2.37 0.95
3 -9 2 1.52 0.85
-3 9 -2 2.76 1.15
-3 9 -2 2.3 1.05
-3 9 -2 2.24 1.06
-3 9 -2 2.34 0.71
3 -9 3 107.78 3.75
3 -9 3 113.55 3.78
3 -9 3 117.33 4.14
3 -9 3 105.49 3.98
3 -9 3 108.52 3.74
3 -9 3 110.01 3.59
-3 9 -3 119.22 3.81
-3 9 -3 117.24 3.54
-3 9 -3 121.23 4.15
-3 9 -3 116.7 4.11
-3 9 -3 118.36 3.99
3 -9 4 87.78 3.72
3 -9 4 88.26 3.77
3 -9 4 91.11 3.51
3 -9 4 90.43 3.48
3 -9 4 84.22 3.71
-3 9 -4 84.81 3.5
-3 9 -4 85.14 2.98
-3 9 -4 86.8 3.67
-3 9 -4 87.58 3.25
3 -9 5 2.09 1.11
3 -9 5 2.98 1.35
3 -9 5 1.38 1.3
3 -9 5 1.01 1.47
3 -9 5 2.05 1.2
-3 9 -5 2.48 0.83
-3 9 -5 2.46 1.38
-3 9 -5 3.56 1.51
-3 9 -5 1.6 1.2
3 -9 6 8.31 1.7
3 -9 6 5.42 1.68
3 -9 6 6.71 1.84
3 -9 6 5.77 1.49
3 -9 6 7.78 1.71
3 -9 6 7.95 1.56
-3 9 -6 5.7 1.85
-3 9 -6 6.74 1.52
-3 9 -6 7.98 1.8
-3 9 -6 5.93 1.03
3 -9 7 7.82 1.83
3 -9 7 5.29 1.82
3 -9 7 2.9 1.55
3 -9 7 2.16 1.7
3 -9 7 5.11 1.67
3 -9 7 3.02 1.67
-3 9 -7 4.08 1.71
-3 9 -7 3.91 1.54
-3 9 -7 4.86 1.81
-3 9 -7 3.49 1.19
3 -9 8 44.38 3.49
3 -9 8 41.66 3.62
3 -9 8 36.68 4.01
3 -9 8 45.68 3.64
3 -9 8 36.75 3.62
-3 9 -8 39.09 2.69
3 -9 9 4.4 2.11
3 -9 9 2.8 2.16
3 -9 9 4.63 2.29
3 -9 9 8.52 2.46
3 -9 9 6.72 2.17
-3 9 -9 8.27 2.38
3 -9 10 3.75 2.82
3 -9 10 -2.85 2.55
3 -9 10 2.44 2.31
3 -9 10 1.3 2.97
-4 10 10 1.07 2.31
-4 10 10 -0.28 2.14
-4 10 9 15.18 1.75
-4 10 9 14.76 2.22
-4 10 9 18.64 2.25
-4 10 8 11.6 1.59
-4 10 8 15.03 1.65
-4 10 8 15.97 2.15
-4 10 8 12.31 1.9
-4 10 7 12.54 1.76
-4 10 7 12.24 1.56
-4 10 7 13.23 1.51
-4 10 6 22.07 1.35
-4 10 6 24.49 1.87
-4 10 6 21.49 2.11
-4 10 6 20.59 1.5
4 -10 -5 19.53 1.63
4 -10 -5 18.2 1.94
4 -10 -5 18.91 1.44
-4 10 5 19.63 1.66
-4 10 5 18.28 1.33
-4 10 5 16.54 2.08
-4 10 5 19.47 1.6
-4 10 5 22.41 2.11
4 -10 -4 43.24 2.2
4 -10 -4 42.52 2.27
4 -10 -4 36.06 2.05
-4 10 4 44.74 2.14
-4 10 4 42.74 1.87
-4 10 4 44.25 2.2
-4 10 4 44.75 2.38
-4 10 4 40.83 2.37
-4 10 4 42.98 1.79
4 -10 -3 15.01 1.58
4 -10 -3 11.92 1.68
4 -10 -3 13.84 1.66
-4 10 3 13.67 1.8
-4 10 3 13.51 1.2
-4 10 3 14 1.67
-4 10 3 13.76 1.22
-4 10 3 13.13 1.44
-4 10 3 12.59 1.59
4 -10 -2 69.49 2.17
4 -10 -2 72.02 2.85
4 -10 -2 70.42 2.8
4 -10 -2 68.12 2.89
4 -10 -2 69.94 2.13
-4 10 2 70.81 2.97
-4 10 2 69.13 2.36
-4 10 2 65.95 2.75
-4 10 2 67.47 2.74
-4 10 2 66.25 2.65
4 -10 -1 17.88 1.31
4 -10 -1 17.5 1.7
4 -10 -1 18.18 1.37
4 -10 -1 17.56 1.77
4 -10 -1 18 1.91
-4 10 1 13.76 1.81
-4 10 1 16.13 1.22
-4 10 1 15.67 1.7
-4 10 1 17.41 1.78
-4 10 1 16.96 1.52
4 -10 0 10.51 1.42
4 -10 0 8.13 1.08
4 -10 0 7.96 0.77
4 -10 0 9.26 1.48
4 -10 0 7.97 1.13
4 -10 0 9.26 1.35
-4 10 0 7.62 1.41
-4 10 0 8.82 1.14
-4 10 0 6.86 1.15
-4 10 0 7.64 1.46
-4 10 0 6.86 1.38
4 -10 1 69.2 2.7
4 -10 1 68.13 2.91
4 -10 1 65.14 3.03
4 -10 1 63.34 3.04
4 -10 1 64.76 2.64
4 -10 1 65.71 2.68
-4 10 -1 69.31 3.19
-4 10 -1 68.97 3.05
-4 10 -1 69.83 3
-4 10 -1 70.7 2.57
-4 10 -1 72.2 2.87
4 -10 2 2.95 1.22
4 -10 2 2.57 0.95
4 -10 2 2.33 0.9
4 -10 2 1.89 0.91
4 -10 2 1.09 0.89
4 -10 2 0.94 1.23
-4 10 -2 1.27 0.71
-4 10 -2 1.12 1.11
-4 10 -2 1.42 1.12
4 -10 3 33.03 2.41
4 -10 3 34.83 2.25
4 -10 3 35.42 2.63
4 -10 3 35.81 2.29
4 -10 3 35.99 2.26
-4 10 -3 34.84 2.6
-4 10 -3 38.44 2.7
-4 10 -3 33.13 2.66
-4 10 -3 31.87 2.33
-4 10 -3 32.97 1.89
4 -10 4 8.91 1.64
4 -10 4 8.17 1.79
4 -10 4 9.44 1.89
4 -10 4 6.7 1.46
-4 10 -4 8.12 1.56
-4 10 -4 4.65 1.53
-4 10 -4 9.21 1.76
-4 10 -4 7.88 1.21
4 -10 5 26.15 2.46
4 -10 5 23.65 2.43
4 -10 5 24.69 3.07
4 -10 5 28.9 2.79
-4 10 -5 24.8 1.9
-4 10 -5 24.19 2.96
-4 10 -5 21.75 2.36
-4 10 -5 28.34 2.92
4 -10 6 19.2 2.36
4 -10 6 10.85 1.8
4 -10 6 15.08 2.45
4 -10 6 14.65 2.43
4 -10 6 15.22 2.18
4 -10 6 14.74 2.05
-4 10 -6 11.03 1.4
-4 10 -6 11.7 2.07
-4 10 -6 15.04 2.37
4 -10 7 3.36 1.9
4 -10 7 1.88 2.15
4 -10 7 3.3 2
4 -10 7 2.55 1.75
4 -10 7 5.55 1.81
-4 10 -7 1.78 2.07
-4 10 -7 5.66 1.48
-4 10 -7 6.58 2.09
4 -10 8 2.29 2.07
4 -10 8 1.56 2.38
4 -10 8 4.67 2.62
4 -10 8 0.85 2.01
4 -10 8 2.44 1.86
-4 10 -8 3.66 1.68
-4 10 -8 0.96 2.11
4 -10 9 4.38 2.51
4 -10 9 2.31 2.65
4 -10 9 2.44 2.62
4 -10 9 4.43 2.33
4 -10 9 8.45 2.61
-4 10 -9 6.59 2.62
-5 11 9 -1.28 1.98
-5 11 9 0.72 1.57
-5 11 9 4.98 2.22
-5 11 8 10.37 1.62
-5 11 8 13.18 2.09
-5 11 8 13.43 1.85
-5 11 7 45.08 1.92
-5 11 7 40.99 2.95
-5 11 7 45.57 3.02
-5 11 7 36.88 2.41
-5 11 7 41 1.76
-5 11 6 22.78 1.98
-5 11 6 19.21 1.54
-5 11 6 20.23 2.51
-5 11 6 19.1 1.74
-5 11 6 17.53 2.39
5 -11 -5 1.31 1.24
5 -11 -5 3.15 1.16
5 -11 -5 3.09 1
-5 11 5 1.82 1.09
-5 11 5 2.74 1.11
-5 11 5 2.41 0.84
-5 11 5 0.75 1.34
-5 11 5 2.5 1.45
5 -11 -4 13.65 1.67
5 -11 -4 11.14 1.64
-5 11 4 14.26 1.87
-5 11 4 12.44 1.68
-5 11 4 13.71 1.83
-5 11 4 15.78 1.74
-5 11 4 14.22 1.44
5 -11 -3 59.06 2.7
5 -11 -3 62.34 2.89
-5 11 3 61.84 2.8
-5 11 3 60.1 2.62
-5 11 3 64.74 2.95
-5 11 3 63.83 3.1
-5 11 3 56.17 2.28
5 -11 -2 129.66 3.49
5 -11 -2 129.11 4.32
5 -11 -2 133.87 3.47
5 -11 -2 134.59 4.29
-5 11 2 127.88 4.08
-5 11 2 127.91 3.69
-5 11 2 130.59 4.25
-5 11 2 124.42 4.1
-5 11 2 126.74 4.4
5 -11 -1 66.75 3.03
5 -11 -1 68.84 2.5
5 -11 -1 67.67 2.49
5 -11 -1 65.64 3.01
-5 11 1 68.53 3.25
-5 11 1 70.37 2.88
-5 11 1 66.82 3.04
-5 11 1 70.64 2.6
-5 11 1 69.89 3.11
5 -11 0 18.84 0.99
5 -11 0 17.4 1.73
5 -11 0 22.12 1.62
5 -11 0 16.53 1.97
5 -11 0 16.4 2.09
-5 11 0 19.11 2.15
-5 11 0 20.34 2.42
-5 11 0 22.85 1.57
-5 11 0 19.72 2.27
-5 11 0 21.96 1.87
5 -11 1 3.46 1.17
5 -11 1 4.69 1.34
5 -11 1 5.41 1.15
5 -11 1 3.03 0.66
5 -11 1 3.17 1.29
5 -11 1 3.29 1.44
-5 11 -1 3.46 1.46
-5 11 -1 2.86 1.37
-5 11 -1 2.76 1.59
-5 11 -1 3.08 0.84
5 -11 2 75 3.53
5 -11 2 71.97 3.67
5 -11 2 77.85 2.52
5 -11 2 78.5 3.2
5 -11 2 75.43 3.2
5 -11 2 76.94 3.22
-5 11 -2 72.28 2.82
-5 11 -2 75.36 3.5
-5 11 -2 78.05 3.67
5 -11 3 51 3.16
5 -11 3 46.7 2.83
5 -11 3 55.15 2.94
5 -11 3 55.27 3.35
-5 11 -3 54.94 3.39
-5 11 -3 54.92 3.38
-5 11 -3 56.69 2.52
5 -11 4 2.26 1.66
5 -11 4 6.25 1.52
5 -11 4 5.76 1.46
5 -11 4 4.18 1.49
5 -11 4 5.01 1.56
-5 11 -4 4.93 1.05
-5 11 -4 3.08 1.77
-5 11 -4 6.76 1.97
5 -11 5 21.13 2.64
5 -11 5 19.4 2.63
5 -11 5 23.53 2.95
5 -11 5 22.68 2.76
5 -11 5 26.65 3.61
5 -11 5 26.24 2.93
-5 11 -5 19.04 2.55
-5 11 -5 20.11 2.73
-5 11 -5 24.53 2.08
5 -11 6 1.15 1.81
5 -11 6 0.02 1.93
5 -11 6 3.1 1.59
5 -11 6 -0.1 1.64
5 -11 6 2.05 1.75
5 -11 6 2.96 2.13
-5 11 -6 5.21 1.45
-5 11 -6 5.46 2.37
-5 11 -6 3.93 1.93
-5 11 -6 2.41 2.05
5 -11 7 3.76 2.08
5 -11 7 6.42 2.34
5 -11 7 -2.13 1.72
5 -11 7 3.36 2.09
5 -11 7 2.32 1.97
-5 11 -7 3.07 1.72
-5 11 -7 0.92 2.16
5 -11 8 0.82 2.28
5 -11 8 -0.56 1.97
5 -11 8 0.79 2.57
5 -11 8 -0.2 2.35
5 -11 8 -0.13 2.96
-5 11 -8 3.74 2.52
-6 12 8 1.77 2.34
-6 12 8 9.02 2.22
-6 12 8 3.06 1.59
-6 12 7 6.93 2.02
-6 12 7 3.01 1.47
-6 12 7 6.94 1.9
-6 12 7 3.88 2.1
-6 12 7 5.68 1.08
-6 12 7 3.82 1.19
6 -12 -6 4.26 1.23
6 -12 -6 4.33 1.69
-6 12 6 6.83 2.1
-6 12 6 3.56 1.06
-6 12 6 5.29 1.28
-6 12 6 5.5 1.95
-6 12 6 5.67 1.38
6 -12 -5 51.51 3
6 -12 -5 51.44 2.91
-6 12 5 51.97 2.69
-6 12 5 55.65 2.33
-6 12 5 54.42 3.36
-6 12 5 51.69 3.23
-6 12 5 58.44 2.9
6 -12 -4 25.04 2.55
6 -12 -4 28.85 2.27
6 -12 -4 31.12 2.52
-6 12 4 33.4 1.98
-6 12 4 32.66 2.27
-6 12 4 38.99 3.07
-6 12 4 32.14 2.51
-6 12 4 37.26 2.8
6 -12 -3 5.37 1.15
6 -12 -3 9.59 1.67
6 -12 -3 2.4 1.56
-6 12 3 6.58 1.52
-6 12 3 9.71 1.77
-6 12 3 8.89 1.33
-6 12 3 9.74 1.81
-6 12 3 10.13 1.26
6 -12 -2 -2 1.3
6 -12 -2 -0.01 0.8
6 -12 -2 0.1 0.72
6 -12 -2 -0.3 1.28
6 -12 -2 2.16 1.28
-6 12 2 1.94 1.01
-6 12 2 1.8 1.46
-6 12 2 2.7 1.49
-6 12 2 1.02 1.34
-6 12 2 1.8 1.04
6 -12 -1 40.24 2.11
6 -12 -1 42.86 2.24
6 -12 -1 44.04 2.67
-6 12 1 48.48 3.25
-6 12 1 51.86 3.03
-6 12 1 47.27 2.95
-6 12 1 43.86 2.29
-6 12 1 46.51 2.63
6 -12 0 94.34 3.46
6 -12 0 100.92 3.49
6 -12 0 98.06 4.1
-6 12 0 91.69 3.35
-6 12 0 99.67 4.06
-6 12 0 92.5 3.95
-6 12 0 104.58 3.84
-6 12 0 91.88 4.24
6 -12 1 20.6 2
6 -12 1 23.82 1.34
6 -12 1 20.89 2.41
6 -12 1 22.65 2.23
6 -12 1 23.4 2.83
-6 12 -1 21.69 2.44
-6 12 -1 26.03 2.71
-6 12 -1 23.64 1.92
6 -12 2 10.06 1.14
6 -12 2 10.09 1.64
6 -12 2 11.56 1.71
6 -12 2 7.81 1.78
6 -12 2 9.42 1.63
6 -12 2 11.18 2.09
-6 12 -2 12.25 2.24
-6 12 -2 7.44 1.79
-6 12 -2 9.33 1.35
6 -12 3 4.3 1.49
6 -12 3 2.23 1.73
6 -12 3 4.61 1.08
6 -12 3 3.57 1.5
6 -12 3 3.7 1.62
6 -12 3 2.77 1.76
6 -12 3 5.31 1.67
-6 12 -3 5.59 2.02
-6 12 -3 3.93 1.12
-6 12 -3 5.27 2.1
-6 12 -3 6.78 1.92
-6 12 -3 1.87 1.63
6 -12 4 28.63 3.32
6 -12 4 32.33 2.97
6 -12 4 30.54 3.16
6 -12 4 33.53 3.84
6 -12 4 31.57 2.93
6 -12 4 30.61 2.17
6 -12 4 28.52 2.89
-6 12 -4 35.89 3.23
-6 12 -4 33.09 3.61
-6 12 -4 30.32 2.42
-6 12 -4 31.45 3.61
6 -12 5 16.09 2.55
6 -12 5 9.31 2.17
6 -12 5 13.62 2.17
6 -12 5 12.44 2.74
6 -12 5 7.91 1.61
-6 12 -5 6.39 2.5
-6 12 -5 10.78 2.24
-6 12 -5 10.55 1.7
-6 12 -5 8.1 2.51
6 -12 6 7.72 1.87
6 -12 6 7.2 2.18
6 -12 6 3.19 2.32
6 -12 6 11.55 2.43
6 -12 6 7.01 2.65
-6 12 -6 5.44 2.44
-6 12 -6 3.91 2.52
-6 12 -6 8.72 1.77
6 -12 7 9.58 2.99
6 -12 7 15.64 2.52
6 -12 7 10.23 2.72
6 -12 7 11.62 2.75
6 -12 7 11.56 3.2
-6 12 -7 14.69 2.88
-6 12 -7 13.43 2.47
6 -12 8 -0.03 3.06
6 -12 8 1.92 2.48
6 -12 8 1.65 2.95
6 -12 8 1.93 2.91
-7 13 8 2.68 1.95
-7 13 8 7.96 2.61
-7 13 7 5.54 2.25
-7 13 7 1.49 1.42
-7 13 7 1.99 2.48
-7 13 7 2.23 1.17
-7 13 7 3.72 1.73
-7 13 7 -1.26 2.47
7 -13 -6 9.51 1.9
7 -13 -6 5.2 2.18
-7 13 6 8.61 1.73
-7 13 6 10.65 2.4
-7 13 6 8.5 1.71
-7 13 6 12.36 1.52
-7 13 6 8.26 2.48
7 -13 -5 11.96 2.07
7 -13 -5 9.68 1.72
-7 13 5 11.98 1.55
-7 13 5 11.06 1.74
-7 13 5 11.28 1.9
-7 13 5 9.45 2.3
-7 13 5 8.61 2.21
7 -13 -4 -1.7 1.3
7 -13 -4 1.58 1.78
7 -13 -4 -2.6 1.57
-7 13 4 1.51 1.36
-7 13 4 0.97 1.55
-7 13 4 1.39 1.94
-7 13 4 0.13 1.91
-7 13 4 0.03 1.15
7 -13 -3 8.44 1.91
7 -13 -3 6.71 1.89
7 -13 -3 9.3 1.74
-7 13 3 12.09 1.72
-7 13 3 9.79 1.9
-7 13 3 9.18 1.48
-7 13 3 9.88 2.09
-7 13 3 10.78 2.17
7 -13 -2 18.15 1.76
7 -13 -2 21.11 2.97
7 -13 -2 17.89 2.2
7 -13 -2 21.74 1.65
7 -13 -2 17.84 2.11
-7 13 2 18.35 2.22
-7 13 2 17.47 2.29
-7 13 2 18.53 1.94
-7 13 2 21.27 2.53
-7 13 2 19.67 2.77
7 -13 -1 43.41 3.24
7 -13 -1 54.68 2.72
7 -13 -1 58.76 2.5
7 -13 -1 55.13 3.62
7 -13 -1 55.35 3.23
-7 13 1 54.57 3.57
-7 13 1 49.75 3.77
-7 13 1 51.41 3.48
-7 13 1 55.67 2.69
-7 13 1 55.97 3.1
7 -13 0 27.72 2.72
7 -13 0 28.79 2.31
7 -13 0 35.71 2.67
7 -13 0 27.2 3.05
-7 13 0 24.57 3.11
-7 13 0 29.25 3.48
-7 13 0 29.73 3.12
-7 13 0 29.63 2.28
7 -13 1 25.22 2.75
7 -13 1 26.72 3.17
7 -13 1 26.24 2.54
7 -13 1 23.96 3.4
7 -13 1 27.35 1.46
-7 13 -1 25.81 3.26
-7 13 -1 31.8 3.34
-7 13 -1 27.14 2.96
-7 13 -1 31.27 2.36
7 -13 2 7.65 2.35
7 -13 2 3.75 1.86
7 -13 2 8.82 1.76
7 -13 2 3.79 2.01
7 -13 2 5.2 1.59
-7 13 -2 5.68 2.36
-7 13 -2 7.22 1.64
-7 13 -2 7.17 2.31
-7 13 -2 5.17 2.24
7 -13 3 17.32 2.62
7 -13 3 16.53 2.35
7 -13 3 12.4 2.52
7 -13 3 16.49 2.53
7 -13 3 15.31 2.35
7 -13 3 16.39 1.85
7 -13 3 21.19 2.76
-7 13 -3 16.92 2.75
-7 13 -3 16.86 2.43
-7 13 -3 19.15 2.78
-7 13 -3 24.03 2.45
-7 13 -3 17.95 2.69
7 -13 4 39.67 3.88
7 -13 4 39.49 4.72
7 -13 4 39.19 3.35
7 -13 4 38.38 3.39
7 -13 4 35.91 2.55
-7 13 -4 28.25 3.04
-7 13 -4 38.53 4.32
-7 13 -4 37.64 4.2
-7 13 -4 31.62 2.88
7 -13 5 14.85 2
7 -13 5 10.46 2.72
7 -13 5 14.62 2.65
7 -13 5 12.35 2.45
-7 13 -5 13.52 3.11
-7 13 -5 7.41 2.58
-7 13 -5 11.91 2.12
7 -13 6 1.39 2.56
7 -13 6 2.41 2.46
7 -13 6 5.33 2.49
7 -13 6 5.41 2.03
-7 13 -6 4.16 2.25
7 -13 7 2.24 2.49
7 -13 7 9.18 3.19
7 -13 7 3.02 3.24
7 -13 7 3.27 3.15
-8 14 7 -4.5 1.88
8 -14 -6 7.02 2.58
-8 14 6 6.94 1.93
-8 14 6 5.79 2.95
-8 14 6 8.1 2.54
-8 14 6 9.72 1.63
8 -14 -5 -1.52 2.21
-8 14 5 -1.28 1.59
-8 14 5 3.58 1.49
-8 14 5 0.35 2.46
-8 14 5 -0.72 1.88
-8 14 5 3.45 2.7
8 -14 -4 28.86 3.48
8 -14 -4 24.95 3.08
-8 14 4 23.27 2.49
-8 14 4 29.01 2.36
-8 14 4 31.59 2.86
-8 14 4 30.28 4.17
-8 14 4 30.27 3.78
8 -14 -3 41.42 3.8
8 -14 -3 45.61 3.34
-8 14 3 46.45 3.86
-8 14 3 47.92 3.53
-8 14 3 47.18 2.79
-8 14 3 39.83 4.22
-8 14 3 45.64 3.26
8 -14 -2 2.5 1.22
8 -14 -2 1.69 1.12
8 -14 -2 4.31 2.1
8 -14 -2 3.78 1.86
-8 14 2 1.77 2.46
-8 14 2 -3.32 1.94
-8 14 2 1.91 1.59
-8 14 2 3.65 2.3
-8 14 2 0.89 1.33
8 -14 -1 6.65 2.14
8 -14 -1 5.35 1.44
8 -14 -1 6.03 1.7
8 -14 -1 8.22 1.86
-8 14 1 6.74 2.26
-8 14 1 3.51 2.48
-8 14 1 5.92 2.28
-8 14 1 3.76 1.43
8 -14 0 5.76 2.19
8 -14 0 6.54 1.97
8 -14 0 5.8 1.64
-8 14 0 8.24 1.63
-8 14 0 6.19 2.26
-8 14 0 8.3 2.4
8 -14 1 49.6 3.58
8 -14 1 50.83 3.83
8 -14 1 49.51 3.28
-8 14 -1 48.18 4.39
-8 14 -1 46.18 4.2
-8 14 -1 50.05 3.19
8 -14 2 17.6 1.96
8 -14 2 25.27 3.07
8 -14 2 19.67 2.61
8 -14 2 20.36 2.81
-8 14 -2 17.05 3.09
-8 14 -2 22.79 3.16
-8 14 -2 26.43 2.92
8 -14 3 1.46 1.85
8 -14 3 2.46 1.44
8 -14 3 3.8 1.96
-8 14 -3 8.32 2.9
-8 14 -3 5.52 1.81
8 -14 4 1.42 2.09
8 -14 4 2.52 2.43
8 -14 4 1.34 2.68
8 -14 4 1.59 1.66
-8 14 -4 2.05 3.13
-8 14 -4 3.21 1.92
8 -14 5 7.81 2.67
8 -14 5 7.45 2.66
8 -14 5 8.98 2.23
8 -14 5 9.48 2.65
-8 14 -5 5.79 2.26
8 -14 6 12.88 3.27
8 -14 6 11.75 3.78
8 -14 6 14.34 2.73
-8 14 -6 15.06 3.14
9 -15 -5 2.77 2.74
-9 15 5 3.26 1.83
-9 15 5 0.46 2.14
9 -15 -4 12.4 2.89
-9 15 4 11.85 2.28
-9 15 4 10.75 1.95
-9 15 4 15.22 3
9 -15 -3 6.37 2.52
-9 15 3 10.1 1.83
-9 15 3 9.53 2.87
9 -15 -2 18.16 3.02
9 -15 -2 18.86 2.39
-9 15 2 14.07 3.15
-9 15 2 22.26 2.69
9 -15 -1 18.63 2.04
9 -15 -1 17.76 2.28
9 -15 -1 16.92 3.01
-9 15 1 14.25 2.78
-9 15 1 14.2 2.05
-9 15 1 15.32 3.07
9 -15 0 7.42 1.89
9 -15 0 3.92 2.21
9 -15 0 4.48 2.42
-9 15 0 5.59 1.81
-9 15 0 9.65 2.84
-9 15 0 5.11 2.88
9 -15 1 5.3 2.56
9 -15 1 6.28 2.61
9 -15 1 4.96 1.98
-9 15 -1 1.86 2.87
-9 15 -1 8.54 2.94
-9 15 -1 5.15 1.92
9 -15 2 4.14 2.4
9 -15 2 4.59 2.28
9 -15 2 4.46 1.5
-9 15 -2 7.19 2.04
-9 15 -2 0.9 3.03
9 -15 3 22.6 3.58
9 -15 3 20.51 2.94
9 -15 3 24.66 2.87
-9 15 -3 30.72 3.6
-9 15 -3 26.27 3.78
9 -15 4 10.13 2.39
9 -15 4 10.73 3.31
-9 15 -4 10.71 2.8
-10 16 3 -2.73 3.33
-10 16 2 2.45 1.91
10 -16 -1 -0.33 2.17
10 -16 -1 -1.17 2.91
-10 16 1 0.79 2
10 -16 0 12.56 3.49
10 -16 0 8.87 2.34
-10 16 0 15.78 2.48
10 -16 1 10.99 3.5
10 -16 1 11.92 2.71
-10 16 -1 14.32 2.56
10 -16 2 6.59 3.52
10 -16 2 7.41 2.77
-10 16 -2 -2.77 2.45
-22 14 0 22.44 2.69
22 -14 0 16.74 3.55
22 -14 0 19.22 2.88
-22 14 1 7.92 2.39
22 -14 -1 9.63 3.51
22 -14 -1 7.26 2.39
-22 14 2 4.34 2.2
22 -14 -2 4.28 3.45
22 -14 -2 7.56 2.4
-22 14 3 4.03 2.21
-22 14 3 4.67 2.52
-21 13 -3 7.78 2.52
21 -13 3 14.81 3.6
21 -13 3 11.82 2.81
21 -13 3 11.49 2.31
-21 13 -2 30.05 3.7
21 -13 2 22.81 3.57
21 -13 2 20.25 2.27
21 -13 2 34.24 4.04
-21 13 -1 10.92 2.2
21 -13 1 10.6 2.37
21 -13 1 14.69 3.03
21 -13 1 8.15 1.69
-21 13 0 6.79 2.06
21 -13 0 7.42 2.12
21 -13 0 8.28 1.35
21 -13 0 6.78 2.43
-21 13 1 0.37 1.73
21 -13 -1 3.53 2.39
21 -13 -1 -0.29 2.62
21 -13 -1 4.82 1.84
21 -13 -1 3.31 2.38
-21 13 2 15.21 2.02
21 -13 -2 10.19 2.68
21 -13 -2 8.07 2.33
21 -13 -2 10.93 2.44
21 -13 -2 16.76 2.11
-21 13 3 7.72 1.87
-21 13 3 8.84 2.05
21 -13 -3 3.5 2.49
21 -13 -3 8.63 2.48
21 -13 -3 8.03 1.62
-21 13 4 8.52 2.01
-21 13 4 13.75 2.36
21 -13 -4 6.01 2.65
-21 13 5 -0.68 1.76
-21 13 5 6.54 2.35
20 -12 5 11.05 2.58
20 -12 5 3.97 3.17
-20 12 -4 12.09 2.98
-20 12 -4 9.81 2.47
20 -12 4 9.98 2.59
20 -12 4 4.52 2.93
20 -12 4 6.55 2.04
20 -12 4 15.45 3.27
-20 12 -3 21.84 2.77
20 -12 3 24.09 2.76
20 -12 3 28.96 3.72
20 -12 3 29.61 3.51
20 -12 3 24.28 3.24
-20 12 -2 6.98 1.84
20 -12 2 6.61 1.43
20 -12 2 10.25 2.15
20 -12 2 7.07 2.58
20 -12 2 7.3 2.53
-20 12 -1 4.03 1.68
20 -12 1 4.13 2.21
20 -12 1 1.83 1.84
20 -12 1 2.59 1.17
20 -12 1 1.35 1.97
20 -12 1 3.72 2.39
20 -12 1 6.65 2.34
-20 12 0 7.56 1.68
20 -12 0 10.01 2.21
20 -12 0 10.35 1.8
20 -12 0 7.98 2.22
20 -12 0 9.68 1.2
20 -12 0 7.56 2.34
20 -12 0 10.26 2.11
-20 12 1 23.56 3.77
-20 12 1 20.09 2.22
20 -12 -1 24.85 2.57
20 -12 -1 20.79 2.68
20 -12 -1 19.96 2.6
20 -12 -1 22.65 3.09
-20 12 2 35.77 4.6
-20 12 2 33.18 2.71
20 -12 -2 33.86 3.26
20 -12 -2 28.91 2.52
-20 12 3 1.02 1.35
-20 12 3 1.46 2.65
20 -12 -3 -0.39 1.66
20 -12 -3 2.37 1.17
20 -12 -3 0.59 1.52
-20 12 4 12.03 2.82
-20 12 4 10.73 2.05
-20 12 4 12.71 1.78
20 -12 -4 9.8 2.06
20 -12 -4 13.56 2.23
-20 12 5 4.55 2.32
-20 12 5 3.53 1.53
-20 12 5 4.06 2.01
20 -12 -5 0.59 1.78
20 -12 -5 2.07 1.88
-20 12 6 15.07 2.58
-20 12 6 15.48 1.99
-20 12 7 4.83 1.71
-20 12 7 7.79 2.75
19 -11 6 10.98 3.13
19 -11 6 15.03 3.35
19 -11 6 13.18 2.72
19 -11 6 6.69 3.2
-19 11 -5 13.9 2.48
19 -11 5 9.48 2.92
19 -11 5 5.85 2.47
19 -11 5 14.3 3.03
19 -11 5 10.56 2.91
19 -11 5 8.77 2.1
-19 11 -4 -0.25 1.64
19 -11 4 -3.15 1.99
19 -11 4 1.1 1.49
19 -11 4 1.7 2.24
19 -11 4 1.39 2.35
-19 11 -3 3.38 1.46
19 -11 3 1.83 2.14
19 -11 3 3.06 1.79
19 -11 3 2.31 1.83
19 -11 3 -0.85 1.27
-19 11 -2 8.18 1.6
-19 11 -2 15.75 2.98
19 -11 2 8.56 2.06
19 -11 2 12.17 2.28
19 -11 2 14.99 2.23
19 -11 2 13.75 1.54
19 -11 2 10.65 2.22
19 -11 2 10.74 2.37
-19 11 -1 49.58 4.68
-19 11 -1 52.16 4.2
-19 11 -1 53.46 2.97
-19 11 -1 54.56 4.34
19 -11 1 58.66 3.47
19 -11 1 57.96 3.77
19 -11 1 55.95 3.27
19 -11 1 55.2 2.31
19 -11 1 50.72 3.57
19 -11 1 53.75 3.74
-19 11 0 33.5 3.94
-19 11 0 28.76 3.6
-19 11 0 32.89 3.71
-19 11 0 34.65 2.53
19 -11 0 27.7 3.02
19 -11 0 30.48 2.55
19 -11 0 29.86 2.97
19 -11 0 30.52 2.84
19 -11 0 33.56 1.69
19 -11 0 31.53 3.09
-19 11 1 2.65 2.03
-19 11 1 0.45 1.22
-19 11 1 4.43 2.01
-19 11 1 2.6 2.18
19 -11 -1 1.43 1.54
19 -11 -1 3.35 1.38
19 -11 -1 2.84 0.72
19 -11 -1 4.97 1.59
-19 11 2 0.15 1.16
-19 11 2 -1.31 2.08
-19 11 2 0.34 1.92
-19 11 2 1.5 1.58
19 -11 -2 -0.06 1.49
19 -11 -2 -1.79 1.28
19 -11 -2 2.29 1.48
19 -11 -2 -0.27 1.12
19 -11 -2 1.06 1.39
-19 11 3 32.61 3.58
-19 11 3 31.45 3.72
-19 11 3 34.74 3.88
-19 11 3 36.59 2.36
19 -11 -3 35.53 2.02
19 -11 -3 38.7 2.38
19 -11 -3 33.99 2.71
19 -11 -3 39.28 2.87
19 -11 -3 33.44 2.85
-19 11 4 48.5 2.96
-19 11 4 38.75 3.75
-19 11 4 37.41 3.82
-19 11 4 40.82 3.94
-19 11 4 43.62 2.59
19 -11 -4 40.62 1.81
19 -11 -4 45.84 2.06
19 -11 -4 43.54 2.72
19 -11 -4 43.15 3.01
-19 11 5 1.18 2.36
-19 11 5 1.25 1.54
-19 11 5 3.32 2.2
-19 11 5 0.5 1.18
-19 11 5 0.06 2.16
19 -11 -5 0.6 1.35
19 -11 -5 0.53 1.52
-19 11 6 3.91 1.34
-19 11 6 3.15 1.78
-19 11 6 4.62 2.1
-19 11 6 6.77 2.41
19 -11 -6 2.65 1.71
19 -11 -6 2.91 1.31
-19 11 7 -0.08 2.61
-19 11 7 1.47 1.36
-19 11 7 2.43 1.97
-19 11 8 9.84 2.98
-19 11 8 7.97 1.65
-19 11 8 9.37 2.41
18 -10 7 -0.13 2.41
18 -10 7 -5.09 2.66
18 -10 7 -2.6 2.69
18 -10 7 1.91 3.2
-18 10 -6 2.58 2.16
18 -10 6 8.63 2.48
18 -10 6 5.65 2.03
18 -10 6 6.62 2.64
18 -10 6 5.75 2.53
18 -10 6 4.57 2.29
-18 10 -5 5.27 1.72
-18 10 -5 3.28 2.64
-18 10 -5 6.84 2.01
18 -10 5 3.42 1.92
18 -10 5 5.01 1.83
18 -10 5 5.23 2.23
18 -10 5 3.74 2.43
18 -10 5 3.58 2.05
-18 10 -4 16.97 2.85
-18 10 -4 21 2.42
-18 10 -4 17.03 2.23
18 -10 4 21.99 2.88
18 -10 4 21.62 2.94
18 -10 4 18.3 2.3
18 -10 4 25.02 2.88
18 -10 4 16.42 2.33
-18 10 -3 18.8 2.84
-18 10 -3 15.55 1.75
-18 10 -3 13.62 2.75
18 -10 3 14.68 2.43
18 -10 3 13.87 1.98
18 -10 3 15.82 1.97
18 -10 3 15.05 2.17
18 -10 3 13.49 2.36
18 -10 3 15.22 2.01
-18 10 -2 5.92 2.15
-18 10 -2 3.32 2.07
-18 10 -2 4.42 2.01
-18 10 -2 1.24 1.1
18 -10 2 7.48 1.75
18 -10 2 5.78 1.5
18 -10 2 5.5 1.77
18 -10 2 5.76 1.66
18 -10 2 6.51 1.77
18 -10 2 4.26 1.09
-18 10 -1 5.64 1.1
-18 10 -1 10.26 2.46
-18 10 -1 7.06 1.95
-18 10 -1 6.63 1.88
18 -10 1 5.46 1.52
18 -10 1 6.46 1.65
18 -10 1 7.88 1.03
18 -10 1 7 1.58
-18 10 0 24.85 2.89
-18 10 0 27.74 3.25
-18 10 0 25.43 1.95
18 -10 0 25.85 2.55
18 -10 0 24.25 2.15
18 -10 0 25.3 1.49
18 -10 0 22.96 2.4
18 -10 0 26.08 2.51
-18 10 1 72.52 3.83
-18 10 1 64.64 4.06
-18 10 1 67.87 2.86
-18 10 1 62.35 3.79
18 -10 -1 67.05 2.89
18 -10 -1 63.39 3.26
18 -10 -1 64.53 2.95
18 -10 -1 60.46 3.08
18 -10 -1 61.38 1.93
18 -10 -1 63.06 3.16
-18 10 2 25.84 2.73
-18 10 2 25.45 2
-18 10 2 20.7 2.96
-18 10 2 26.61 2.93
18 -10 -2 29.83 1.9
18 -10 -2 24.63 2.34
18 -10 -2 24.04 2.1
18 -10 -2 25.5 2.22
18 -10 -2 25.55 2.35
-18 10 3 24.57 3.07
-18 10 3 26.08 1.97
-18 10 3 29 3.12
-18 10 3 24.87 2.92
18 -10 -3 28.82 1.71
18 -10 -3 29.46 2.42
18 -10 -3 26.74 1.96
18 -10 -3 25.03 2.32
18 -10 -3 23.55 2.15
-18 10 4 9.52 1.53
-18 10 4 7.96 1.29
-18 10 4 8.64 2.05
-18 10 4 8.66 2.11
-18 10 4 5.84 1.99
18 -10 -4 7.33 0.88
18 -10 -4 8.37 1.58
18 -10 -4 7.84 1.4
18 -10 -4 7.13 1.02
-18 10 5 27.93 2.53
-18 10 5 24.74 2.99
-18 10 5 25.54 1.93
-18 10 5 26.47 3.41
-18 10 5 23.73 3.01
18 -10 -5 25.96 1.89
18 -10 -5 26.18 2.32
18 -10 -5 24.26 2.23
-18 10 6 19.53 2.52
-18 10 6 17.05 1.85
-18 10 6 15.78 2.21
-18 10 6 15.48 2.34
18 -10 -6 12.54 1.68
18 -10 -6 16.76 2.3
18 -10 -6 18.1 1.63
-18 10 7 11.62 2.06
-18 10 7 6.99 1.31
-18 10 7 9.42 2.02
-18 10 7 8.22 2.24
-18 10 8 12.49 2.3
-18 10 8 12.95 2.54
-18 10 9 -0.39 1.34
-18 10 9 -2.06 2.15
-18 10 9 -2.07 2.41
17 -9 8 0.31 2.62
17 -9 8 1.69 2.71
17 -9 8 -0.05 2.7
17 -9 7 15.38 2.95
17 -9 7 13.93 2.48
17 -9 7 14.13 2.71
17 -9 7 18.39 2.65
-17 9 -6 5.45 1.67
-17 9 -6 3.22 1.74
17 -9 6 4.54 2.22
17 -9 6 3.84 1.94
17 -9 6 2.82 1.85
17 -9 6 4.45 1.7
17 -9 6 4.6 2.19
-17 9 -5 0.11 1.95
-17 9 -5 3.39 1.38
-17 9 -5 3.65 1.51
17 -9 5 2.06 1.94
17 -9 5 1.67 1.73
17 -9 5 4.21 1.86
17 -9 5 2.2 1.61
17 -9 5 0.39 1.77
17 -9 5 0.45 1.7
17 -9 5 2.85 1.49
-17 9 -4 10.31 1.44
-17 9 -4 6.63 1.58
-17 9 -4 6.98 1.98
-17 9 -4 5.49 2.19
17 -9 4 5.93 1.7
17 -9 4 9.97 1.85
17 -9 4 8.64 1.95
17 -9 4 9.76 1.9
17 -9 4 7.83 1.77
17 -9 4 9.47 1.55
17 -9 4 6.61 1.78
-17 9 -3 3.82 1.73
-17 9 -3 3.3 1.67
17 -9 3 9.93 1.8
17 -9 3 10.49 1.69
17 -9 3 10.28 1.88
17 -9 3 5.76 1.58
17 -9 3 9.82 1.29
17 -9 3 9.68 2
17 -9 3 9.42 1.86
-17 9 -2 28.35 1.97
-17 9 -2 28.99 3.21
17 -9 2 30.39 2.41
17 -9 2 30.47 2.49
17 -9 2 29.7 1.74
17 -9 2 29.37 2.56
-17 9 -1 17.35 1.64
-17 9 -1 19.79 2.65
-17 9 -1 20.22 2.79
17 -9 1 15.66 2
17 -9 1 18.9 1.39
17 -9 1 17.74 2.09
17 -9 1 18.09 1.99
17 -9 1 16.86 2.2
-17 9 0 27.65 2.73
-17 9 0 30.36 1.88
-17 9 0 34.13 3.04
17 -9 0 38.95 2.33
17 -9 0 33.25 2.36
17 -9 0 35.62 1.53
17 -9 0 34.88 2.55
17 -9 0 32.51 2.24
-17 9 1 24.63 2.65
-17 9 1 23.92 1.72
-17 9 1 19.59 2.5
-17 9 1 22.72 2.68
17 -9 -1 23.05 1.15
17 -9 -1 24.29 2.1
17 -9 -1 21.66 1.75
17 -9 -1 22.96 2.09
17 -9 -1 24.06 2.07
17 -9 -1 22.84 1.95
-17 9 2 2.34 1.66
-17 9 2 1.65 1.54
-17 9 2 0.2 0.78
-17 9 2 1.84 1.37
17 -9 -2 1.95 1.07
17 -9 -2 2.84 1.18
17 -9 -2 1.26 0.94
17 -9 -2 2.74 0.53
17 -9 -2 2.38 0.88
17 -9 -2 3.04 1.1
-17 9 3 33.19 1.9
-17 9 3 31.54 2.71
-17 9 3 29.33 2.53
-17 9 3 31.89 2.84
17 -9 -3 29.85 1.61
17 -9 -3 28.06 1.88
17 -9 -3 29.22 2.09
17 -9 -3 28.61 1.74
17 -9 -3 24.75 2.01
-17 9 4 12.2 1.39
-17 9 4 12.52 2.03
-17 9 4 14.45 1.78
-17 9 4 10.48 1.8
-17 9 4 10.12 1.7
17 -9 -4 11.97 1.63
17 -9 -4 10.63 1.46
17 -9 -4 10.98 1.02
17 -9 -4 10.73 1.19
-17 9 5 51.37 3.08
-17 9 5 49.59 2.26
-17 9 5 50.54 2.99
-17 9 5 55.14 2.82
17 -9 -5 48.09 2.34
17 -9 -5 45.02 2.48
17 -9 -5 45.72 1.97
-17 9 6 9.81 1.87
-17 9 6 8.17 1.69
-17 9 6 8.1 1.22
-17 9 6 9.42 1.7
17 -9 -6 7.18 1.4
17 -9 -6 9.97 1.33
-17 9 7 6.79 1.15
-17 9 7 5.04 1.56
-17 9 7 7.5 1.89
-17 9 7 9.57 1.79
17 -9 -7 7.15 1.22
-17 9 8 1.09 1.41
-17 9 8 0.14 1.02
-17 9 8 2.44 1.94
-17 9 8 1.57 1.63
17 -9 -8 0.48 1.15
-17 9 9 9.74 1.33
-17 9 9 13.31 2.53
-17 9 9 9.02 2.26
-17 9 10 10.21 2.25
16 -8 8 2.09 2.33
16 -8 8 1.18 2.37
16 -8 8 -0.02 2.06
16 -8 8 5.02 2.54
16 -8 8 4.28 2.52
-16 8 -7 6.56 1.77
16 -8 7 8.64 1.97
16 -8 7 5.9 1.78
16 -8 7 5.84 2.21
16 -8 7 5.5 1.89
16 -8 7 3.69 2.15
-16 8 -6 5.58 1.35
-16 8 -6 3.33 1.41
-16 8 -6 4.61 2.43
16 -8 6 5.98 1.85
16 -8 6 6.75 1.72
16 -8 6 2.38 1.47
16 -8 6 4.84 1.8
16 -8 6 3.01 1.69
16 -8 6 5.45 1.85
-16 8 -5 26.96 2.13
-16 8 -5 27.25 2.06
-16 8 -5 23.2 3.26
16 -8 5 26.54 2.83
16 -8 5 28.4 2.29
16 -8 5 30.58 2.93
16 -8 5 25.66 2.65
16 -8 5 28.94 2.76
16 -8 5 30.92 2.77
16 -8 5 27.55 3.01
-16 8 -4 55.17 2.59
-16 8 -4 58.62 2.63
16 -8 4 58.15 3.11
16 -8 4 61.74 3.12
16 -8 4 58.31 2.69
16 -8 4 59.66 3.39
16 -8 4 55.39 3.34
-16 8 -3 10.5 1.88
-16 8 -3 14.38 1.61
-16 8 -3 13.81 1.96
16 -8 3 11.38 1.6
16 -8 3 12.67 1.82
16 -8 3 14.25 1.87
16 -8 3 12.83 1.49
16 -8 3 12.85 1.67
-16 8 -2 22.21 2.56
-16 8 -2 22.15 2.38
-16 8 -2 22.53 1.66
16 -8 2 23.1 2.09
16 -8 2 23.85 2.2
16 -8 2 24.79 1.59
16 -8 2 24.82 2.07
16 -8 2 27.77 2.29
-16 8 -1 23.56 2.35
-16 8 -1 20.87 2.51
-16 8 -1 23.54 1.6
16 -8 1 21.74 1.94
16 -8 1 20.95 2.06
16 -8 1 22.88 1.85
16 -8 1 24.79 1.41
16 -8 1 25.29 2.12
-16 8 0 32.55 2.66
-16 8 0 35.37 1.82
-16 8 0 37.28 2.63
16 -8 0 39.2 2.2
16 -8 0 37.8 1.57
16 -8 0 41.49 2.17
16 -8 0 36.78 2.32
16 -8 0 38.15 2.14
16 -8 0 39.43 2.09
-16 8 1 2.57 1.39
-16 8 1 3.04 0.76
-16 8 1 1.75 1.28
-16 8 1 3.27 1.24
16 -8 -1 1.65 0.86
16 -8 -1 2.38 0.92
16 -8 -1 3.88 0.98
16 -8 -1 3.73 1.05
16 -8 -1 4.59 0.64
16 -8 -1 3.85 0.97
-16 8 2 41.66 2.77
-16 8 2 40.92 2.67
-16 8 2 40.26 1.93
-16 8 2 43.08 2.5
16 -8 -2 41.09 2.02
16 -8 -2 40.33 1.99
16 -8 -2 37.59 1.32
16 -8 -2 38.36 1.87
16 -8 -2 40.17 2.09
16 -8 -2 39.43 2.22
-16 8 3 6.81 1.01
-16 8 3 6.23 1.37
-16 8 3 6.42 1.47
-16 8 3 7.26 1.55
16 -8 -3 5.94 1.06
16 -8 -3 7.14 0.97
16 -8 -3 6.8 1.24
16 -8 -3 5.78 0.98
16 -8 -3 5.92 0.84
-16 8 4 27.83 2.4
-16 8 4 27.52 1.88
-16 8 4 27.51 1.65
-16 8 4 26.39 2.19
16 -8 -4 26.49 1.34
16 -8 -4 28.53 1.2
16 -8 -4 27.15 1.51
16 -8 -4 28.04 1.9
-16 8 5 15.7 2.06
-16 8 5 10.79 1.32
-16 8 5 11.91 1.48
-16 8 5 14.18 1.97
16 -8 -5 12.25 1.09
16 -8 -5 11.16 1.58
-16 8 6 2.37 0.87
-16 8 6 -0.41 1.16
-16 8 6 1.59 1.29
-16 8 6 0.86 1.19
16 -8 -6 1.93 0.96
16 -8 -6 0.17 0.86
-16 8 7 24.15 2.26
-16 8 7 27.99 1.79
-16 8 7 26.57 2.36
-16 8 7 26.52 2.43
16 -8 -7 25.67 1.65
-16 8 8 7.53 1.74
-16 8 8 6.25 1.41
-16 8 8 8.38 1.81
-16 8 8 7.45 1.17
16 -8 -8 6.3 1.15
-16 8 9 4.1 1.09
-16 8 9 4.15 1.13
-16 8 9 5.49 1.34
-16 8 9 4.7 1.88
-16 8 9 0.94 1.8
-16 8 9 3.62 1.04
-16 8 10 2.49 1.91
15 -7 9 5.09 2.54
15 -7 9 -1.02 2.44
15 -7 9 4.99 2.45
15 -7 9 1.94 2.83
15 -7 8 10.4 2.69
15 -7 8 6.12 2.08
15 -7 8 13.47 2.61
15 -7 8 10.66 2.17
-15 7 -7 18.36 2.32
15 -7 7 23.57 3.01
15 -7 7 28.2 3.27
15 -7 7 24.79 3.04
15 -7 7 25.97 2.93
15 -7 7 25.22 2.71
15 -7 7 24.14 2.84
-15 7 -6 31.73 2.31
-15 7 -6 33.9 1.88
-15 7 -6 33.17 3.42
15 -7 6 33.15 2.72
15 -7 6 38.32 3.1
15 -7 6 34.95 2.57
15 -7 6 34 2.65
15 -7 6 34.72 2.95
-15 7 -5 28.08 3.03
-15 7 -5 27.83 1.94
-15 7 -5 24.99 2.42
-15 7 -5 23.62 1.73
15 -7 5 27.78 2.54
15 -7 5 26.32 2.08
15 -7 5 23.93 2.32
15 -7 5 27.57 2.54
15 -7 5 24.29 2.28
-15 7 -4 21.16 1.67
-15 7 -4 20.83 2.56
-15 7 -4 21.84 2.32
-15 7 -4 22.07 1.64
15 -7 4 21.91 2.23
15 -7 4 23.4 2.23
15 -7 4 21.55 1.69
15 -7 4 24.97 2.08
15 -7 4 22.48 2.1
-15 7 -3 116.94 4.11
-15 7 -3 117.22 3.53
-15 7 -3 105.98 4.43
15 -7 3 119.28 4.21
15 -7 3 118.95 3.84
15 -7 3 119.38 4.35
15 -7 3 119.9 4.14
15 -7 3 122.94 4.12
15 -7 3 122.54 3.59
-15 7 -2 45.04 2.55
-15 7 -2 42.8 1.97
-15 7 -2 41.22 2.84
-15 7 -2 43.29 2.86
15 -7 2 41.69 2.21
15 -7 2 43.68 2.4
15 -7 2 41.58 2.36
15 -7 2 41.17 1.82
15 -7 2 41.79 2.17
-15 7 -1 35.15 1.74
-15 7 -1 35.59 2.53
-15 7 -1 35.21 2.32
-15 7 -1 35.63 2.39
15 -7 1 31.68 2.05
15 -7 1 36.14 1.99
15 -7 1 39.62 1.61
15 -7 1 39.56 2.06
15 -7 1 36.93 2.19
-15 7 0 77.94 3.25
-15 7 0 78.68 3.15
-15 7 0 76.8 2.6
-15 7 0 78.03 3.39
15 -7 0 74.51 3.04
15 -7 0 75.36 2.78
15 -7 0 77.12 2.8
15 -7 0 75.37 2.2
15 -7 0 70.68 2.68
-15 7 1 27.54 2.22
-15 7 1 33.27 2.13
-15 7 1 29.96 1.59
-15 7 1 32.84 2.24
15 -7 -1 32.08 1.68
15 -7 -1 28.71 1.2
15 -7 -1 28.35 1.69
15 -7 -1 27.8 1.72
15 -7 -1 26.37 1.78
-15 7 2 73.53 2.46
-15 7 2 73.05 2.89
-15 7 2 68.34 3.08
-15 7 2 69.17 2
-15 7 2 75.1 3.14
15 -7 -2 77.96 2.07
15 -7 -2 81.88 2.65
15 -7 -2 80.14 3.05
15 -7 -2 84.16 2.7
15 -7 -2 79.4 2.74
15 -7 -2 84.76 2.67
-15 7 3 21.89 1.81
-15 7 3 27.38 1.12
-15 7 3 27.83 1.46
-15 7 3 25.26 2.03
15 -7 -3 28.46 1.76
15 -7 -3 32.08 1.71
15 -7 -3 30.14 1.5
15 -7 -3 29.57 1.47
15 -7 -3 33.33 1.44
-15 7 4 37.78 1.93
-15 7 4 34.85 1.64
-15 7 4 31.97 2.19
-15 7 4 37.3 2.11
15 -7 -4 39.69 1.4
15 -7 -4 33.28 1.95
15 -7 -4 39.02 1.33
15 -7 -4 37.39 1.51
-15 7 5 15.72 1.23
-15 7 5 16.22 1.76
-15 7 5 14.86 0.93
-15 7 5 13.5 1.76
-15 7 5 14.78 1.55
15 -7 -5 15.05 0.97
15 -7 -5 15.97 1.34
15 -7 -5 14.88 1.54
-15 7 6 16.08 1.79
-15 7 6 13.53 1.84
-15 7 6 16.98 1.09
-15 7 6 18.08 1.79
-15 7 6 15.7 1.34
15 -7 -6 16.57 1.68
-15 7 7 37.03 1.8
-15 7 7 40.22 2.51
-15 7 7 37.25 1.58
-15 7 7 32.92 2.19
-15 7 7 40.51 2.42
15 -7 -7 37.31 1.91
-15 7 8 4.07 1.41
-15 7 8 5.46 1.01
-15 7 8 4.9 1.26
-15 7 8 2.22 1.31
-15 7 8 2.28 0.88
-15 7 9 5.17 1.26
-15 7 9 7.65 1.61
-15 7 9 6.8 1.21
-15 7 9 4.84 1
-15 7 9 8 1.77
-15 7 10 1.44 1.75
-15 7 10 -0.27 1.36
-15 7 10 1.21 1.7
-15 7 10 2.38 1.36
-15 7 11 4.9 2.13
-15 7 11 2.22 2.43
14 -6 9 5.89 2.26
14 -6 9 5.97 2.53
14 -6 9 6.48 2.31
14 -6 9 2.61 2.11
-14 6 -8 12.35 1.83
14 -6 8 14.48 2.08
14 -6 8 14.06 2.24
14 -6 8 10.69 2.02
14 -6 8 10.6 2.06
14 -6 8 14.21 2.54
14 -6 8 10.54 1.71
-14 6 -7 16.45 2.59
-14 6 -7 18.17 2.03
-14 6 -7 18.25 2.33
14 -6 7 18.2 2.18
14 -6 7 18.66 2.28
14 -6 7 19.84 2.45
14 -6 7 19.69 2.32
14 -6 7 18.02 2.15
-14 6 -6 9.24 1.01
-14 6 -6 5.92 1.21
-14 6 -6 9.15 2.02
14 -6 6 8.9 1.82
14 -6 6 6.98 1.54
14 -6 6 7.78 1.65
14 -6 6 11.39 1.64
14 -6 6 8.52 1.54
-14 6 -5 9.43 1.55
-14 6 -5 9.33 1.22
-14 6 -5 11.27 1.29
14 -6 5 10.81 1.45
14 -6 5 14.81 2
14 -6 5 9.71 1.46
14 -6 5 10.74 1.52
14 -6 5 13.36 1.65
-14 6 -4 84.42 3.67
-14 6 -4 81.33 3.26
-14 6 -4 82.64 2.56
-14 6 -4 83.27 2.83
14 -6 4 87.65 3.55
14 -6 4 88.95 3.34
14 -6 4 92.81 3.64
14 -6 4 86.67 3.02
14 -6 4 83.61 3.1
-14 6 -3 175.92 4.5
-14 6 -3 164.77 4.95
-14 6 -3 165.27 5.43
-14 6 -3 173.1 5.32
14 -6 3 168.18 4.62
14 -6 3 175.33 5.03
14 -6 3 176.22 4.55
14 -6 3 172.41 5.3
-14 6 -2 54.23 2.58
-14 6 -2 54.07 2.67
-14 6 -2 61.58 2.95
-14 6 -2 57.76 2.14
14 -6 2 54.89 2.51
14 -6 2 60.19 2.67
14 -6 2 59.32 2.35
14 -6 2 57.84 2.1
14 -6 2 59.36 2.49
-14 6 -1 46.69 2.29
-14 6 -1 39.9 2.42
-14 6 -1 40.88 2.24
-14 6 -1 43.91 1.79
14 -6 1 38.65 2.12
14 -6 1 40.38 2.02
14 -6 1 39.3 1.94
14 -6 1 40.09 1.56
14 -6 1 42.04 1.93
-14 6 0 38.67 2.19
-14 6 0 40.65 2.27
-14 6 0 40.37 2.08
-14 6 0 40.18 1.7
14 -6 0 37.08 1.82
14 -6 0 40.54 1.8
14 -6 0 38.76 1.84
14 -6 0 39.01 2.04
14 -6 0 36.22 1.4
-14 6 1 196.76 4.43
-14 6 1 198.51 5.31
-14 6 1 202.27 5.55
-14 6 1 195.96 5.63
-14 6 1 195.13 4.76
14 -6 -1 205.76 5.17
14 -6 -1 205.03 5.6
14 -6 -1 194.06 4.94
14 -6 -1 200.79 4.4
14 -6 -1 200.11 4.88
-14 6 2 160.24 4.85
-14 6 2 165.57 4.58
-14 6 2 167.14 4.85
-14 6 2 160.16 3.67
-14 6 2 166.07 4.1
14 -6 -2 168.34 4.3
14 -6 -2 165.31 4.16
14 -6 -2 165.33 4.75
14 -6 -2 164.22 3.64
14 -6 -2 163.89 4.13
-14 6 3 15.62 1.57
-14 6 3 16.66 1.12
-14 6 3 16.22 1.43
-14 6 3 13.88 1.19
-14 6 3 16.43 0.9
14 -6 -3 16.79 1
14 -6 -3 19.03 1.4
14 -6 -3 17.19 1.09
14 -6 -3 16.52 1.23
14 -6 -3 16.44 1.06
-14 6 4 21.34 1.24
-14 6 4 20.6 1.7
-14 6 4 22.09 1.61
-14 6 4 20.25 1.44
-14 6 4 20.99 1
14 -6 -4 20.11 1.28
14 -6 -4 18.7 0.94
14 -6 -4 19.66 1.42
14 -6 -4 18.4 0.88
14 -6 -4 18.46 0.97
-14 6 5 29.33 1.44
-14 6 5 31.06 1.93
-14 6 5 29.68 1.25
-14 6 5 32.08 1.81
-14 6 5 31.99 1.85
14 -6 -5 34.99 1.53
14 -6 -5 31.79 1.74
-14 6 6 110.26 3.05
-14 6 6 104.84 3.55
-14 6 6 114.96 3.7
-14 6 6 112.23 3.45
-14 6 6 113.33 2.84
14 -6 -6 109.99 2.91
14 -6 -6 109.15 3.37
-14 6 7 11.77 1.4
-14 6 7 13.13 1.65
-14 6 7 10.61 1.32
-14 6 7 10.82 1.19
-14 6 7 9.72 1.02
14 -6 -7 9.4 1.19
14 -6 -7 9.47 1.04
-14 6 8 9.66 1.33
-14 6 8 9.21 1.36
-14 6 8 10.39 1.18
-14 6 8 9.44 1.48
-14 6 8 9.93 1.05
-14 6 9 20.91 1.43
-14 6 9 16.4 1.93
-14 6 9 21.13 1.76
-14 6 9 21.22 2.39
-14 6 9 17.64 2.11
-14 6 10 0.84 1.38
-14 6 10 4.32 1.7
-14 6 10 5.38 1.56
-14 6 10 1.56 1.93
-14 6 11 11.66 2.09
-14 6 11 9.69 2.78
-14 6 11 13.85 2.32
13 -5 10 4.8 2.32
13 -5 10 -1.04 2.19
13 -5 10 4.35 2.47
13 -5 10 3.64 2.6
13 -5 9 3 1.99
13 -5 9 -0.17 1.84
13 -5 9 0.61 1.83
13 -5 9 0.05 1.75
13 -5 9 3.18 2.18
13 -5 9 0.02 1.85
-13 5 -8 2.26 1.21
-13 5 -8 3.58 2.3
13 -5 8 0.27 1.67
13 -5 8 1.37 1.48
13 -5 8 1.13 1.49
13 -5 8 1.41 1.31
13 -5 8 0.57 1.4
-13 5 -7 12.41 2.23
-13 5 -7 11.41 1.48
13 -5 7 9.25 1.36
13 -5 7 9.77 1.82
13 -5 7 10.96 1.66
13 -5 7 13.41 1.73
13 -5 7 9.42 1.66
-13 5 -6 28.51 1.84
13 -5 6 27.24 2.1
13 -5 6 29.62 2.43
13 -5 6 29.15 2.14
13 -5 6 23.33 2.22
13 -5 6 24.44 1.89
-13 5 -5 18.87 1.45
-13 5 -5 18.71 2.24
-13 5 -5 20.36 1.16
-13 5 -5 21.9 1.83
13 -5 5 19.2 1.9
13 -5 5 21.11 1.75
13 -5 5 21.04 1.89
13 -5 5 20.2 1.79
13 -5 5 21.41 1.71
-13 5 -4 7.79 1.48
-13 5 -4 4.17 1.06
-13 5 -4 7.02 1.17
-13 5 -4 8.23 0.9
-13 5 -4 7.84 1.03
13 -5 4 6.11 1.16
13 -5 4 6.81 1.02
13 -5 4 7.38 1
13 -5 4 5.99 1.1
13 -5 4 7.13 1.12
-13 5 -3 11.91 1.38
-13 5 -3 10.57 1.05
-13 5 -3 8.24 1.41
-13 5 -3 7.82 1.49
13 -5 3 8.96 1.29
13 -5 3 9.71 1.22
13 -5 3 9.69 1.04
13 -5 3 9.64 1.28
13 -5 3 9.55 1.37
-13 5 -2 139.4 4.28
-13 5 -2 142.05 4.46
-13 5 -2 135.58 4.06
-13 5 -2 136 3.63
13 -5 2 149.04 3.81
13 -5 2 148.58 4.25
13 -5 2 149.26 4.54
13 -5 2 150.12 4.41
13 -5 2 147.35 3.93
-13 5 -1 330.5 8.35
-13 5 -1 330.15 7.84
-13 5 -1 327.03 7.19
13 -5 1 333.48 7.37
13 -5 1 342.58 8.46
13 -5 1 334.52 7.93
13 -5 1 337.29 7.2
-13 5 0 82.72 2.81
-13 5 0 78.88 2.9
-13 5 0 83.58 2.36
-13 5 0 81.11 2.45
-13 5 0 86.22 3.09
13 -5 0 89.17 3.03
13 -5 0 82.93 2.29
13 -5 0 84.12 2.75
13 -5 0 88.29 2.66
13 -5 0 83.58 2.58
-13 5 1 29.38 1.65
-13 5 1 29.62 1.22
-13 5 1 31.5 1.77
-13 5 1 31.06 1.83
-13 5 1 29.29 1.35
13 -5 -1 30.21 1.45
13 -5 -1 29.23 1.44
13 -5 -1 29.39 1.12
13 -5 -1 28.88 1.61
13 -5 -1 28.27 1.35
-13 5 2 30.43 1.61
-13 5 2 29.06 1.12
-13 5 2 26.67 1.28
-13 5 2 26.86 1.7
13 -5 -2 31.84 1.46
13 -5 -2 29.79 1.62
13 -5 -2 33.7 1.42
13 -5 -2 32 1.12
-13 5 3 182.76 4.29
-13 5 3 181.94 4.54
-13 5 3 179.12 3.93
-13 5 3 179.56 4.99
-13 5 3 183.5 4.71
13 -5 -3 178.58 4.88
13 -5 -3 184.82 4.29
13 -5 -3 177.46 4.12
13 -5 -3 183.39 4.29
-13 5 4 129.71 3.04
-13 5 4 128.67 3.89
-13 5 4 133.68 3.69
-13 5 4 131.87 3.67
-13 5 4 132.46 3.34
13 -5 -4 132.79 3.05
13 -5 -4 129.36 3.82
13 -5 -4 136.91 3.34
13 -5 -4 130.92 3.03
13 -5 -4 134.44 3.06
-13 5 5 26.21 1.53
-13 5 5 27.53 1.6
-13 5 5 24.48 1.62
-13 5 5 25.71 1.17
-13 5 5 27.22 1.3
13 -5 -5 17.54 1.36
-13 5 6 22.4 1.66
-13 5 6 18.48 1.49
-13 5 6 21.59 1.49
-13 5 6 20.67 1.24
-13 5 6 21.42 1.23
13 -5 -6 24.58 1.24
-13 5 7 20.44 1.44
-13 5 7 20.3 1.53
-13 5 7 20.66 1.54
-13 5 7 21.69 1.25
-13 5 7 20.91 1.71
13 -5 -7 18.13 1.24
13 -5 -7 18.99 1.07
-13 5 8 21.22 1.97
-13 5 8 32.2 1.82
-13 5 8 30.72 1.95
-13 5 8 26.64 1.46
-13 5 9 6.32 0.98
-13 5 9 7.73 1.54
-13 5 9 6.62 0.93
-13 5 9 6 1.2
-13 5 10 4.16 1.55
-13 5 10 4.96 1.79
-13 5 10 4.1 1.37
-13 5 11 2.26 1.44
-13 5 11 0.92 2.26
-13 5 11 1.68 1.78
12 -4 10 0.99 2.22
12 -4 10 -0.22 1.84
12 -4 10 2.77 2.02
12 -4 10 4.93 2.55
-12 4 -9 10.74 1.56
12 -4 9 11.26 2.38
12 -4 9 12.28 1.97
12 -4 9 7.09 2.01
12 -4 9 8.29 1.97
12 -4 9 10.16 2.05
-12 4 -8 5.83 1.89
-12 4 -8 6.07 1.56
-12 4 -8 5.42 1.17
12 -4 8 7.78 1.36
12 -4 8 9.84 1.96
12 -4 8 6.68 1.5
12 -4 8 10.53 1.7
12 -4 8 7.04 1.48
12 -4 7 8.95 1.49
12 -4 7 7.35 1.65
12 -4 7 8.2 1.23
12 -4 7 7.07 1.34
12 -4 7 9.95 1.48
-12 4 -6 27.78 1.7
-12 4 -6 22.97 2.43
12 -4 6 26.91 2.25
12 -4 6 22.88 1.88
12 -4 6 26.92 2.03
12 -4 6 26.92 1.79
12 -4 6 28.53 1.93
-12 4 -5 19.95 1.57
-12 4 -5 18.07 1.99
-12 4 -5 20.49 1.4
-12 4 -5 19.25 1.95
12 -4 5 15.5 1.47
12 -4 5 15.38 1.69
12 -4 5 17.49 1.48
12 -4 5 16.99 1.59
12 -4 5 19.08 1.61
-12 4 -4 36.48 2.21
-12 4 -4 39.15 1.35
-12 4 -4 40.21 2.27
-12 4 -4 39.99 1.93
-12 4 -4 38.33 1.69
12 -4 4 43.29 2.05
12 -4 4 43.03 2.18
12 -4 4 43.37 1.94
12 -4 4 45.44 2.24
12 -4 4 44.8 1.92
-12 4 -3 17.11 1.6
-12 4 -3 19.45 1.18
-12 4 -3 17 1.64
-12 4 -3 16.75 1.42
12 -4 3 17.72 1.37
12 -4 3 21.28 1.51
12 -4 3 21.44 1.27
12 -4 3 19.57 1.49
12 -4 3 20.57 1.32
-12 4 -2 199.55 5.42
-12 4 -2 202.7 5.6
-12 4 -2 209.55 5.23
-12 4 -2 202.28 4.76
12 -4 2 202.98 4.76
12 -4 2 203.13 5.35
12 -4 2 204 5.18
12 -4 2 195.83 4.75
-12 4 -1 151.68 3.69
-12 4 -1 150.71 3.69
-12 4 -1 148.12 4.22
-12 4 -1 152.14 4.39
-12 4 -1 142.58 4.02
12 -4 1 148.32 3.63
12 -4 1 145.15 4.17
12 -4 1 136.6 3.86
12 -4 1 137.61 4.01
12 -4 1 145.06 3.5
-12 4 0 23.7 1.41
-12 4 0 25.66 1.18
-12 4 0 24 1.13
-12 4 0 24.02 1.54
-12 4 0 25.32 1.5
12 -4 0 21.48 1.19
12 -4 0 20.32 1.35
12 -4 0 20.76 1.23
12 -4 0 21.48 0.99
-12 4 1 170.07 4.72
-12 4 1 170.98 4.44
-12 4 1 176.65 4.06
-12 4 1 176.16 3.86
-12 4 1 168.6 4.61
12 -4 -1 170.2 4.04
12 -4 -1 170.47 4.63
12 -4 -1 172.37 3.78
12 -4 -1 172.24 4.3
12 -4 -1 170.08 4.07
-12 4 2 220.89 5.13
-12 4 2 226.55 5.76
-12 4 2 222.55 4.72
-12 4 2 228.19 4.99
-12 4 2 219.23 5.4
12 -4 -2 221.18 4.56
12 -4 -2 212.94 5.04
12 -4 -2 215.42 4.81
12 -4 -2 211.17 4.82
12 -4 -2 216.87 5.53
-12 4 3 163.85 3.88
-12 4 3 163.24 4.21
-12 4 3 165.92 4.14
-12 4 3 166.94 3.65
-12 4 3 167.68 4.51
12 -4 -3 168.05 4.51
12 -4 -3 169.36 3.93
12 -4 -3 170.18 3.73
12 -4 -3 168.93 3.95
-12 4 4 36.87 1.59
-12 4 4 36.2 1.62
-12 4 4 34.77 1.72
-12 4 4 37.62 1.31
-12 4 4 37.57 1.4
12 -4 -4 42.81 1.2
12 -4 -4 42.58 1.51
12 -4 -4 41.73 1.75
12 -4 -4 43.22 1.22
-12 4 5 167.82 4.51
-12 4 5 167.01 4.18
-12 4 5 166.21 4.4
-12 4 5 163.92 3.83
-12 4 5 169.89 3.93
12 -4 -5 161.19 3.69
12 -4 -5 158.57 4.25
-12 4 6 19.35 1.12
-12 4 6 22.28 1.5
-12 4 6 19.78 1.38
-12 4 6 18.34 1.28
12 -4 -6 16.88 1
-12 4 7 65.55 2.4
-12 4 7 68.31 2.65
-12 4 7 66.4 2.26
-12 4 7 67.91 2.07
12 -4 -7 68.82 1.85
12 -4 -7 68.44 2.18
-12 4 8 34.4 1.51
-12 4 8 39.49 2.21
-12 4 8 29.02 1.85
-12 4 8 36.53 1.76
-12 4 9 4.86 1.08
-12 4 9 2.64 0.75
-12 4 9 4.34 0.9
-12 4 9 3 1.33
-12 4 9 2.7 1.21
-12 4 10 3.91 1.42
-12 4 10 8.07 1.29
-12 4 10 5.59 1.75
-12 4 11 1.7 2
-12 4 11 4.27 1.83
-12 4 11 1.61 1.37
-12 4 12 13.6 2.88
-12 4 12 9.35 2.32
-12 4 12 10.05 2.47
11 -3 10 1.52 2.05
11 -3 10 4.89 1.88
11 -3 10 1.64 1.82
11 -3 10 -2.16 1.53
11 -3 10 0.73 2.22
-11 3 -9 2.61 1.21
-11 3 -9 3.22 1.47
-11 3 -9 2.36 2.13
11 -3 9 3.86 1.65
11 -3 9 5.66 1.58
11 -3 9 0.51 1.63
11 -3 9 5 1.94
11 -3 9 3.43 1.48
-11 3 -8 2.46 1.83
-11 3 -8 5.69 1.34
-11 3 -8 4.99 1.06
11 -3 8 6.43 1.51
11 -3 8 6.99 1.68
11 -3 8 5.19 1.14
11 -3 8 5.85 1.33
11 -3 8 3.21 1.45
-11 3 -7 21.14 1.52
-11 3 -7 25.42 2.58
11 -3 7 20.03 2.17
11 -3 7 22.73 1.95
11 -3 7 21 1.83
11 -3 7 20.32 1.59
11 -3 7 18.9 1.92
-11 3 -6 25.99 2.22
11 -3 6 23.78 1.71
11 -3 6 23.93 1.98
11 -3 6 22.76 1.56
11 -3 6 25.06 1.82
11 -3 6 24.73 1.83
-11 3 -5 24.93 1.85
-11 3 -5 25.59 1.39
-11 3 -5 19.96 1.88
11 -3 5 27.14 1.53
11 -3 5 28.42 1.7
11 -3 5 29.02 1.88
11 -3 5 27.4 1.67
11 -3 5 26.56 1.76
-11 3 -4 58.1 2
-11 3 -4 54.6 2.06
-11 3 -4 57.9 2.49
-11 3 -4 56.53 2.47
11 -3 4 51.57 2.23
11 -3 4 54.88 1.96
11 -3 4 49.04 2.03
11 -3 4 52.42 2.11
11 -3 4 52.83 2.31
-11 3 -3 9.34 1.27
-11 3 -3 8.54 0.83
-11 3 -3 10.1 1.09
-11 3 -3 9.62 1.21
11 -3 3 8.08 1.04
11 -3 3 7.06 0.9
11 -3 3 8.12 1.01
11 -3 3 7.67 0.94
11 -3 3 8.93 0.93
-11 3 -2 40.38 1.65
-11 3 -2 40.18 1.7
-11 3 -2 38.23 1.47
-11 3 -2 39.3 1.88
11 -3 2 41.17 1.83
11 -3 2 41.74 1.8
11 -3 2 40.57 1.56
11 -3 2 40.98 1.58
11 -3 2 41.82 1.7
-11 3 -1 74.69 2.18
-11 3 -1 75.12 2.14
-11 3 -1 71.12 2.35
-11 3 -1 71.69 2.45
-11 3 -1 72.38 2.56
11 -3 1 79.17 2.19
11 -3 1 76.55 2.5
11 -3 1 76.4 2.59
11 -3 1 75.05 2.4
11 -3 1 77.94 2.25
-11 3 0 452.7 10.11
-11 3 0 485.37 10.76
-11 3 0 475.37 9.43
-11 3 0 446.84 10.39
-11 3 0 469.24 9.37
11 -3 0 470.86 10.71
11 -3 0 464.53 9.34
11 -3 0 464.63 10.11
-11 3 1 74.96 2.07
-11 3 1 71.1 2.03
-11 3 1 73.06 1.95
-11 3 1 76.48 2.5
-11 3 1 72.57 2.3
11 -3 -1 71.68 1.91
11 -3 -1 79.02 2.49
11 -3 -1 76.2 2.12
11 -3 -1 70.23 2.19
-11 3 2 77.85 2.15
-11 3 2 77.8 2
-11 3 2 77.04 2.23
-11 3 2 80.88 2.57
-11 3 2 78.4 2.37
11 -3 -2 78.18 2.53
11 -3 -2 80.57 2.25
11 -3 -2 80.6 2.19
11 -3 -2 81.84 2.02
11 -3 -2 81.69 2.01
-11 3 3 19.58 1.1
-11 3 3 21.72 1.01
-11 3 3 21 1.26
-11 3 3 21.04 0.94
-11 3 3 18.96 1.13
11 -3 -3 17.8 0.61
11 -3 -3 17.43 0.82
11 -3 -3 19.83 1.15
11 -3 -3 17.95 0.95
-11 3 4 64.09 1.85
-11 3 4 65.26 1.9
-11 3 4 66.49 2.17
-11 3 4 68.92 2.28
-11 3 4 61.71 1.99
11 -3 -4 61.57 2.1
11 -3 -4 60.35 1.77
-11 3 5 155.9 3.59
-11 3 5 151.73 3.74
-11 3 5 151.06 4.08
-11 3 5 150.72 4.03
11 -3 -5 164.03 3.67
11 -3 -5 162.65 4.21
-11 3 6 13.66 0.95
-11 3 6 14.59 1.04
-11 3 6 13.38 1.19
-11 3 6 12.77 1.21
11 -3 -6 11.45 0.83
-11 3 7 3.47 0.79
-11 3 7 4.67 0.98
-11 3 7 3.98 0.64
-11 3 7 5.16 0.8
11 -3 -7 5.36 0.72
11 -3 -7 5.62 0.62
-11 3 8 17.75 1.66
-11 3 8 19.89 1.35
-11 3 8 20.08 1.5
-11 3 8 16.6 1.14
-11 3 9 20.24 1.95
-11 3 9 20.59 2.25
-11 3 9 16.17 1.39
-11 3 9 16.77 1.27
-11 3 9 18.35 1.51
-11 3 10 26.9 2.85
-11 3 10 22.34 1.88
-11 3 10 22.65 2.35
-11 3 10 20.78 1.44
-11 3 11 -1.14 1.95
-11 3 11 0.6 1.24
-11 3 11 -0.73 1.44
-11 3 12 8.32 2.05
-11 3 12 10.35 2.63
10 -2 11 0.71 2.58
10 -2 11 6.4 2.19
10 -2 11 2.4 2
10 -2 11 0.54 1.78
10 -2 11 2.75 2.5
10 -2 10 10.74 2.03
10 -2 10 16.21 1.95
10 -2 10 14.6 2.05
10 -2 10 15.74 2.65
10 -2 10 17.3 2.08
-10 2 -9 7.27 2.08
-10 2 -9 7.09 1.25
-10 2 -9 7.7 1.15
10 -2 9 8.53 1.55
10 -2 9 6.98 1.4
10 -2 9 7.63 1.91
10 -2 9 7.54 1.46
10 -2 9 9.47 1.85
-10 2 -8 14.29 1.46
-10 2 -8 14.46 1.44
10 -2 8 12.47 1.51
10 -2 8 13.6 1.81
10 -2 8 11.83 1.73
10 -2 8 17.46 2.19
10 -2 8 14.72 1.83
-10 2 -7 31.62 1.59
-10 2 -7 33.27 2.53
10 -2 7 37.75 2.11
10 -2 7 34.34 1.79
10 -2 7 39.78 2.42
10 -2 7 36.48 2.02
-10 2 -6 33.26 1.53
-10 2 -6 35.71 2.32
10 -2 6 39.02 2.23
10 -2 6 34.61 1.62
10 -2 6 36.6 1.86
10 -2 6 35.52 1.99
10 -2 6 34.98 1.9
-10 2 -5 128.88 4.01
-10 2 -5 123.16 3.85
10 -2 5 120.74 3.71
10 -2 5 119.42 3.18
10 -2 5 119.48 3.47
10 -2 5 121.63 3.84
-10 2 -4 15.44 1
-10 2 -4 15.36 1.4
-10 2 -4 14.96 1.34
-10 2 -4 14.1 1.02
10 -2 4 12.99 1.23
10 -2 4 12.65 1.1
10 -2 4 10.93 1.03
10 -2 4 11.97 1.14
10 -2 4 12.11 0.95
-10 2 -3 80.82 2.24
-10 2 -3 75.74 2.63
-10 2 -3 78.1 2.35
-10 2 -3 78.55 2.65
10 -2 3 76.65 2.53
10 -2 3 79.41 2.42
10 -2 3 76.02 2.55
10 -2 3 74.3 2.19
10 -2 3 73.28 2.33
-10 2 -2 34.3 1.59
-10 2 -2 36.52 1.34
-10 2 -2 35.9 1.51
-10 2 -2 38.1 1.69
-10 2 -2 36.5 1.49
10 -2 2 34.36 1.39
10 -2 2 32.95 1.51
10 -2 2 34.5 1.46
10 -2 2 38.51 1.61
10 -2 2 36.55 1.36
-10 2 -1 204.61 5.28
-10 2 -1 205.13 4.59
-10 2 -1 211.14 5.14
-10 2 -1 217.98 4.99
-10 2 -1 215.51 4.7
10 -2 1 194.73 4.99
10 -2 1 195.82 4.71
10 -2 1 201.56 4.86
10 -2 1 195.39 4.37
10 -2 1 199.78 4.41
-10 2 0 120.98 2.84
-10 2 0 115.46 2.84
-10 2 0 119.52 3.11
-10 2 0 120.7 3.21
-10 2 0 116.02 2.72
-10 2 0 118.02 3.33
10 -2 0 114.45 2.8
10 -2 0 114.3 3.01
10 -2 0 114.03 3.22
10 -2 0 116.93 2.74
-10 2 1 37.14 1.44
-10 2 1 38.16 1.3
-10 2 1 39.42 1.25
-10 2 1 38.96 1.58
-10 2 1 37.95 1.27
10 -2 -1 34.93 1.25
10 -2 -1 35.31 1.32
10 -2 -1 34.87 1.15
10 -2 -1 36.16 1.48
-10 2 2 359.89 7.28
-10 2 2 347.51 7.75
-10 2 2 345.63 7.48
-10 2 2 377.25 8.28
-10 2 2 356.17 7.18
10 -2 -2 357.82 8.02
10 -2 -2 337.59 7.41
10 -2 -2 337.17 6.95
10 -2 -2 352.74 7.07
-10 2 3 13.67 1.01
-10 2 3 19.05 1.02
-10 2 3 16.27 0.92
-10 2 3 14.5 0.82
-10 2 3 14.43 0.81
10 -2 -3 18.68 0.8
10 -2 -3 17.48 1.05
10 -2 -3 19.12 0.91
-10 2 4 157.73 4.04
-10 2 4 154.54 3.54
-10 2 4 152.12 3.68
-10 2 4 154.45 3.89
10 -2 -4 159.18 3.29
10 -2 -4 124.24 3.64
-10 2 5 28.85 1.38
-10 2 5 28.58 1.2
-10 2 5 29.83 1.47
-10 2 5 27.74 1.16
10 -2 -5 28.59 1.11
10 -2 -5 28.59 1.3
-10 2 6 76.4 2.17
-10 2 6 78.16 2.48
-10 2 6 78.73 2.61
-10 2 6 76.67 2.21
10 -2 -6 77 2.02
-10 2 7 58.5 2.33
-10 2 7 58.46 1.9
-10 2 7 57.69 1.85
-10 2 7 55.1 2.08
10 -2 -7 54.48 1.58
10 -2 -7 54.22 1.83
-10 2 8 29.99 1.38
-10 2 8 28.01 1.57
-10 2 8 26.55 2.09
-10 2 8 28.85 1.86
-10 2 8 27.68 1.45
-10 2 9 27.71 1.59
-10 2 9 24.27 1.45
-10 2 9 27.82 2.44
-10 2 9 24.45 1.55
-10 2 9 26.03 2.03
-10 2 10 7.55 1.21
-10 2 10 5.42 1.43
-10 2 10 4.6 0.93
-10 2 10 1.97 1.64
-10 2 11 1.57 1.24
-10 2 11 -2.11 1.78
-10 2 11 4.76 1.58
-10 2 12 4.55 1.99
-10 2 12 4.55 2.44
9 -1 11 3.57 1.57
9 -1 11 3.04 1.67
9 -1 11 0.77 2.18
9 -1 11 5.18 2.39
9 -1 11 3.51 2.02
9 -1 10 17.25 2.39
9 -1 10 12.81 1.99
9 -1 10 20.7 2.6
9 -1 10 15.78 2.15
9 -1 10 17.01 2.4
9 -1 9 6.69 1.85
9 -1 9 7.79 1.39
9 -1 9 7.14 1.66
9 -1 9 8.4 1.3
9 -1 9 5.97 1.34
-9 1 -8 20.05 1.33
-9 1 -8 17.78 2.43
9 -1 8 23.79 2.27
9 -1 8 19.66 2.08
9 -1 8 21.11 1.65
9 -1 8 23.28 1.8
9 -1 8 22.1 1.71
-9 1 -7 24.54 2.19
-9 1 -7 21.96 1.26
-9 1 -7 21.89 1.46
9 -1 7 23.52 1.4
9 -1 7 24.59 1.64
9 -1 7 24.09 1.62
9 -1 7 23.01 1.87
9 -1 7 22.94 1.95
-9 1 -6 100.7 3.5
-9 1 -6 97.46 2.8
-9 1 -6 98.26 2.61
9 -1 6 97.49 3.25
9 -1 6 101.04 3.44
9 -1 6 96.87 2.99
9 -1 6 95.65 3.11
-9 1 -5 119.97 2.97
-9 1 -5 124.42 3.57
-9 1 -5 117.14 3.69
9 -1 5 129.48 3.6
9 -1 5 121.07 3.54
9 -1 5 119.95 3.72
9 -1 5 121.38 3.07
9 -1 5 119.97 3.34
-9 1 -4 50.21 2.09
-9 1 -4 54.37 1.66
-9 1 -4 55.54 2.06
9 -1 4 53.6 2
9 -1 4 53.12 1.71
9 -1 4 54.27 1.89
9 -1 4 54.2 2.09
9 -1 4 57.47 2.04
-9 1 -3 208.14 4.66
-9 1 -3 208.4 5.16
-9 1 -3 198.23 5.07
9 -1 3 195.23 4.67
9 -1 3 197.58 4.97
9 -1 3 193.28 4.33
9 -1 3 202.42 4.95
-9 1 -2 42.13 1.6
-9 1 -2 41.01 1.62
-9 1 -2 40.02 1.34
-9 1 -2 40.34 1.54
-9 1 -2 41.33 1.44
9 -1 2 42.34 1.37
9 -1 2 41.74 1.61
9 -1 2 40.82 1.49
9 -1 2 42.19 1.57
9 -1 2 43.61 1.5
-9 1 -1 184.44 4.32
-9 1 -1 186.13 4.15
-9 1 -1 184.96 3.79
-9 1 -1 187.87 4.64
-9 1 -1 187.12 4.04
-9 1 -1 182.91 4.44
9 -1 1 191.71 4.18
9 -1 1 193.82 4.26
9 -1 1 194.5 4.78
9 -1 1 189.93 4.58
9 -1 1 195.43 4.51
-9 1 0 196.31 4.87
-9 1 0 199.87 4.6
-9 1 0 199.41 4.19
-9 1 0 201.83 4.7
-9 1 0 199.61 4.29
-9 1 0 202.05 4.29
9 -1 0 204.35 4.71
9 -1 0 208.13 5
9 -1 0 205.82 4.39
9 -1 0 204.12 4.39
-9 1 1 6.88 0.6
-9 1 1 7.11 0.59
-9 1 1 7.1 0.58
-9 1 1 7.88 0.69
9 -1 -1 4.44 0.53
9 -1 -1 4.8 0.66
9 -1 -1 5.05 0.6
9 -1 -1 4.78 0.53
9 -1 -1 4.53 0.55
-9 1 2 108.74 2.59
-9 1 2 110.04 2.56
-9 1 2 106.66 2.73
-9 1 2 113.71 2.99
-9 1 2 108 2.71
9 -1 -2 110.48 2.96
9 -1 -2 112.69 2.6
9 -1 -2 105.77 2.68
9 -1 -2 107.13 2.65
-9 1 3 21.95 1.11
-9 1 3 19.46 1.02
-9 1 3 20.43 0.9
-9 1 3 21.68 0.95
9 -1 -3 21.3 0.82
9 -1 -3 21.28 1.08
9 -1 -3 21.32 0.92
9 -1 -3 21.06 1.05
-9 1 4 145.6 3.34
-9 1 4 145.44 3.64
-9 1 4 143.4 3.76
-9 1 4 145.97 3.44
9 -1 -4 149.14 3.39
9 -1 -4 153.93 3.89
9 -1 -4 155.74 3.27
9 -1 -4 147.17 3.74
-9 1 5 7.26 0.83
-9 1 5 8.14 0.73
-9 1 5 7.13 0.87
-9 1 5 8.27 0.72
9 -1 -5 7.82 0.71
9 -1 -5 7.43 0.83
9 -1 -5 9.3 0.96
-9 1 6 49.86 1.64
-9 1 6 46.12 1.26
-9 1 6 45.81 1.91
-9 1 6 46.42 1.59
-9 1 6 47.31 1.81
9 -1 -6 50.86 1.55
9 -1 -6 46.22 1.94
-9 1 7 17.56 1.09
-9 1 7 19.59 1.28
-9 1 7 19.82 0.89
-9 1 7 17.78 1.61
-9 1 7 16.76 1.4
-9 1 7 18.58 1.14
9 -1 -7 19.8 1.13
9 -1 -7 22.43 1.05
9 -1 -7 18.75 1.49
-9 1 8 19.38 1.86
-9 1 8 19.32 1.37
-9 1 8 19.91 1.22
-9 1 8 18.89 1.29
-9 1 8 17.19 1.04
-9 1 8 19.54 1.59
-9 1 9 1.55 1.08
-9 1 9 2.87 0.85
-9 1 9 2.69 0.71
-9 1 9 1.18 1.18
-9 1 9 2.37 0.91
-9 1 9 3.94 0.83
-9 1 10 9.63 1.62
-9 1 10 6.07 1.16
-9 1 10 8.12 0.93
-9 1 10 5.28 1.64
-9 1 10 8.02 1.2
-9 1 10 6.15 0.98
-9 1 11 2.38 1.74
-9 1 11 2.1 0.89
-9 1 11 2.86 1.01
-9 1 11 3.75 0.99
-9 1 11 1.94 1.51
-9 1 11 2.16 1.26
-9 1 12 2.06 2.31
-9 1 12 3.45 1.89
8 0 11 -0.29 2.25
8 0 11 0.77 2.17
8 0 11 0.47 1.68
8 0 11 1.06 1.47
8 0 10 1.06 1.76
8 0 10 2.04 1.09
8 0 10 4.64 1.7
8 0 10 1.8 1.32
8 0 9 12.5 1.86
8 0 9 11.96 1.79
8 0 9 12.16 1.33
8 0 9 10.38 1.29
8 0 9 12.84 1.48
8 0 8 74.55 2.65
8 0 8 73.88 2.56
8 0 8 78.09 3.25
8 0 8 76.35 2.62
8 0 8 71.1 3.17
-8 0 -7 5.8 0.77
-8 0 -7 5.24 1.29
-8 0 -7 5.46 0.66
8 0 7 5.96 0.92
8 0 7 6.66 0.8
8 0 7 4.66 0.99
8 0 7 3.83 1.03
8 0 7 4.48 0.87
-8 0 -6 2.81 0.55
-8 0 -6 1.68 0.58
-8 0 -6 4.13 1.05
8 0 6 3.86 0.74
8 0 6 4.26 0.74
8 0 6 3.56 0.62
8 0 6 4.52 1.05
8 0 6 3.44 0.82
-8 0 -5 12.62 1.28
-8 0 -5 10.4 0.77
8 0 5 12.27 1.14
8 0 5 10.35 0.91
8 0 5 10.85 0.81
8 0 5 11.06 0.97
8 0 5 12.5 1.15
-8 0 -4 323.43 7.52
-8 0 -4 327.06 6.57
-8 0 -4 320.03 7.48
8 0 4 333.8 6.8
8 0 4 327.97 7.28
8 0 4 332.9 7.76
8 0 4 337.16 7.72
8 0 4 339.8 7.34
-8 0 -3 119.93 2.69
-8 0 -3 115.67 3.12
-8 0 -3 122.71 3.2
-8 0 -3 120.32 2.75
-8 0 -3 116.43 3.19
8 0 3 119.93 3.21
8 0 3 119.37 2.99
8 0 3 116.14 3.08
8 0 3 119.76 2.78
8 0 3 124.65 3.22
-8 0 -2 159.54 3.75
-8 0 -2 161.43 3.64
-8 0 -2 164.95 4.01
-8 0 -2 155.5 3.87
8 0 2 162.21 3.52
8 0 2 161.05 3.73
8 0 2 165.87 4.04
8 0 2 158.18 3.76
8 0 2 160.1 3.9
-8 0 -1 4.07 0.51
-8 0 -1 3.72 0.34
-8 0 -1 3.86 0.51
-8 0 -1 4.6 0.52
-8 0 -1 4.49 0.66
-8 0 -1 3.9 0.56
8 0 1 4.21 0.56
8 0 1 4.2 0.58
8 0 1 4.6 0.57
8 0 1 5.36 0.65
8 0 1 4.23 0.32
8 0 1 4.38 0.51
-8 0 0 32.95 1.17
-8 0 0 33.2 1.11
-8 0 0 29.21 1.22
-8 0 0 31.67 0.95
-8 0 0 30.7 1.06
8 0 0 31.61 1.15
8 0 0 31.46 0.95
8 0 0 31.37 1.09
8 0 0 31.6 1.25
8 0 0 33.1 1.09
-8 0 1 517.66 9.96
-8 0 1 507.68 9.96
-8 0 1 507.31 10.14
-8 0 1 507.25 10.57
-8 0 1 508.06 11.19
8 0 -1 512.57 11.13
8 0 -1 513.56 9.89
8 0 -1 503.14 10.48
8 0 -1 508.56 10.07
8 0 -1 493.88 9.89
-8 0 2 582.51 12.94
-8 0 2 590.95 11.56
-8 0 2 593.8 11.88
-8 0 2 596.83 12.22
-8 0 2 606.51 11.56
8 0 -2 547.14 12.85
8 0 -2 603 11.48
8 0 -2 612.07 11.84
8 0 -2 602.99 12.12
8 0 -2 591.72 11.84
-8 0 3 4.5 0.3
-8 0 3 5.02 0.67
-8 0 3 4.25 0.53
-8 0 3 4.75 0.54
-8 0 3 4.22 0.55
8 0 -3 4.45 0.47
8 0 -3 5.35 0.67
8 0 -3 5.43 0.68
8 0 -3 4.32 0.55
-8 0 4 76.78 1.78
-8 0 4 79.6 2.09
-8 0 4 76.73 2.28
-8 0 4 81.01 2.36
-8 0 4 75.1 2.08
8 0 -4 79.89 2.07
8 0 -4 76.29 1.9
8 0 -4 76.4 2.31
8 0 -4 88.15 2.41
-8 0 5 79.89 2.48
-8 0 5 81.73 2.49
-8 0 5 83.06 2.24
-8 0 5 81.9 2.23
8 0 -5 81.29 2.47
8 0 -5 79.36 2.41
8 0 -5 82.29 2.13
-8 0 6 92.76 2.55
-8 0 6 99.47 2.59
-8 0 6 95.13 2.88
-8 0 6 89.3 2.35
-8 0 6 92.15 2.83
-8 0 6 99.59 3.26
8 0 -6 95.75 2.46
8 0 -6 99.78 2.94
8 0 -6 94 2.78
-8 0 7 4.51 1.02
-8 0 7 2.76 0.59
-8 0 7 1.51 0.67
-8 0 7 4.09 0.83
-8 0 7 3.45 0.69
-8 0 7 2.69 0.64
8 0 -7 2.13 0.83
8 0 -7 3.45 0.61
-8 0 8 35.4 1.92
-8 0 8 34.6 1.76
-8 0 8 33.53 2.26
-8 0 8 31.1 1.56
-8 0 8 32 1.58
-8 0 8 32.89 1.47
8 0 -8 34.78 1.95
8 0 -8 35.25 1.34
8 0 -8 33.42 1.39
-8 0 9 2.99 0.87
-8 0 9 0.31 1.25
-8 0 9 1.77 0.89
-8 0 9 1.24 0.81
-8 0 9 2.99 0.82
-8 0 9 2.1 1.01
8 0 -9 3.26 1.17
-8 0 10 7.13 1.3
-8 0 10 5.85 1.08
-8 0 10 4.25 1.15
-8 0 10 6.5 1.74
-8 0 10 3.71 1.11
-8 0 11 13.71 1.51
-8 0 11 15.55 2.45
-8 0 11 12.49 1.8
-8 0 11 17.71 2.05
-8 0 11 15.7 1.77
-8 0 11 13.38 1.78
-8 0 12 1.71 1.76
-8 0 12 2.45 1.16
-8 0 12 2.63 2.48
-8 0 12 2.16 1.6
7 1 11 1.51 1.54
7 1 11 3.94 2.19
7 1 11 3.41 2.19
7 1 10 0.83 1.71
7 1 10 6.39 1.33
7 1 10 4.51 1.68
7 1 9 16.46 2.22
7 1 9 13.83 1.81
7 1 9 15.05 1.59
7 1 8 3.22 1.07
7 1 8 2.08 0.69
7 1 8 1.5 1.03
7 1 8 3.42 0.75
7 1 8 2.97 0.83
7 1 7 39.4 1.38
7 1 7 37.64 2.05
7 1 7 36.14 1.54
7 1 7 41.07 2.15
7 1 7 39.7 1.65
-7 -1 -6 95.97 3.18
7 1 6 99.23 3.25
7 1 6 101.73 2.72
7 1 6 101.83 2.81
7 1 6 101.9 2.46
7 1 6 96.59 3.14
-7 -1 -5 64.14 2.3
-7 -1 -5 65.01 1.63
7 1 5 61.85 2.21
7 1 5 63.26 1.69
7 1 5 61.41 2.22
7 1 5 61.02 1.82
7 1 5 63.96 1.95
-7 -1 -4 64.44 1.61
-7 -1 -4 62.15 1.89
-7 -1 -4 63 2.09
7 1 4 69.31 2.21
7 1 4 68.35 1.76
7 1 4 68.13 1.88
7 1 4 69.91 2.04
7 1 4 68.71 2.19
-7 -1 -3 111.06 2.46
-7 -1 -3 103.91 2.84
-7 -1 -3 113.91 2.84
-7 -1 -3 108.12 2.88
7 1 3 106.34 2.69
7 1 3 97.67 2.7
7 1 3 100.35 2.68
7 1 3 106.18 2.35
7 1 3 97.44 2.46
-7 -1 -2 396.49 7.77
-7 -1 -2 388.08 8.5
-7 -1 -2 399.78 8.08
-7 -1 -2 403.94 8.77
7 1 2 399.94 8.49
7 1 2 415.95 9.03
7 1 2 400.76 7.99
7 1 2 417.85 8.3
7 1 2 408.19 8.74
-7 -1 -1 208.05 4.43
-7 -1 -1 205 4.5
-7 -1 -1 209.98 4.34
-7 -1 -1 201.83 4.54
-7 -1 -1 213.55 4.85
7 1 1 212.88 4.3
7 1 1 218.4 4.42
7 1 1 208.74 4.67
7 1 1 208.75 4.69
7 1 1 222.38 5.01
7 1 1 216.37 4.55
-7 -1 0 134.53 3.01
-7 -1 0 137.36 3.37
-7 -1 0 136.49 2.95
-7 -1 0 134.91 3.15
7 1 0 136.13 3.16
7 1 0 137.02 2.99
7 1 0 134.24 2.94
7 1 0 135.5 3.15
7 1 0 138.42 3.39
-7 -1 1 507.38 9.98
-7 -1 1 500.51 10.55
-7 -1 1 515.41 10.44
-7 -1 1 505.61 10.18
-7 -1 1 519.19 9.99
-7 -1 1 523.63 11.19
7 1 -1 547.74 10.66
7 1 -1 518.43 10.75
7 1 -1 525.15 10.16
7 1 -1 520.03 11.4
7 1 -1 512.1 10.36
7 1 -1 510.23 10.17
-7 -1 2 126.26 3.03
-7 -1 2 124.85 3.02
-7 -1 2 130.95 2.95
-7 -1 2 131.63 3.31
-7 -1 2 128.83 2.84
7 1 -2 151.77 3.35
7 1 -2 158.73 3.85
7 1 -2 151.06 3.5
7 1 -2 157.91 3.42
7 1 -2 151.9 3.51
-7 -1 3 218.68 4.88
-7 -1 3 217.87 4.68
-7 -1 3 215.68 4.64
-7 -1 3 218.93 4.85
-7 -1 3 222.09 5.24
7 1 -3 233.27 5.31
7 1 -3 216.6 4.82
7 1 -3 220.19 4.7
7 1 -3 218.6 4.7
7 1 -3 219.94 4.9
-7 -1 4 153.14 3.9
-7 -1 4 156.12 3.53
-7 -1 4 153.82 3.4
-7 -1 4 140.94 3.67
-7 -1 4 148.5 4.01
-7 -1 4 151.26 3.58
7 1 -4 151.15 3.36
7 1 -4 156.84 3.79
7 1 -4 138.99 3.26
7 1 -4 131.84 3.51
-7 -1 5 70.29 2.29
-7 -1 5 70.92 2.07
-7 -1 5 73.37 2.27
-7 -1 5 68.22 2.02
-7 -1 5 67.45 1.89
-7 -1 5 67.99 2.48
7 1 -5 71.23 2.28
7 1 -5 71.97 2.27
7 1 -5 71.27 2.02
-7 -1 6 37.13 1.49
-7 -1 6 38.91 1.95
-7 -1 6 39.87 1.49
-7 -1 6 35.8 1.66
-7 -1 6 36.71 1.67
-7 -1 6 33.97 1.36
7 1 -6 35.48 1.68
7 1 -6 34.83 1.42
7 1 -6 36.2 1.6
-7 -1 7 32.6 2.01
-7 -1 7 28.31 1.42
-7 -1 7 30.17 1.63
-7 -1 7 28.04 1.37
-7 -1 7 32.1 1.68
-7 -1 7 29.87 1.48
7 1 -7 32.23 1.33
7 1 -7 31.02 1.41
7 1 -7 29.82 1.7
-7 -1 8 20.95 1.58
-7 -1 8 18.93 1.39
-7 -1 8 21.04 1.55
-7 -1 8 22.67 1.97
-7 -1 8 22.74 1.44
-7 -1 8 18.49 1.34
7 1 -8 17.36 1.24
7 1 -8 19.49 1.16
7 1 -8 22.28 1.68
-7 -1 9 2.29 0.87
-7 -1 9 -0.25 1.06
-7 -1 9 1.48 0.97
-7 -1 9 1.19 0.84
-7 -1 9 0.77 0.9
7 1 -9 2.08 0.68
7 1 -9 1.05 1.06
-7 -1 10 14.85 2.12
-7 -1 10 14.67 1.72
-7 -1 10 11.77 1.52
-7 -1 10 15.43 1.78
-7 -1 10 13.02 1.82
-7 -1 10 15.97 1.78
7 1 -10 13.2 1.2
-7 -1 11 2.24 1.99
-7 -1 11 -0.3 1.38
-7 -1 11 4.26 1.45
-7 -1 11 3.09 1.35
-7 -1 11 0.69 1.19
-7 -1 11 1.75 1.27
-7 -1 12 3.12 1.5
-7 -1 12 3.36 2.59
-7 -1 12 2.67 2.07
-7 -1 12 4.83 1.83
-7 -1 12 4.45 1.8
6 2 11 6.42 2.21
6 2 11 4.25 1.46
6 2 11 4.92 2.15
6 2 11 3.08 1.68
6 2 10 1.12 1.04
6 2 10 3.03 1.62
6 2 10 1.17 1.62
6 2 9 8.89 1.1
6 2 9 7.25 1.48
6 2 9 8.72 1.55
6 2 9 9.34 0.99
6 2 8 1.84 0.64
6 2 8 0.83 0.93
6 2 8 0.81 0.69
6 2 8 -0.07 0.96
6 2 7 25.37 1.72
6 2 7 25.41 1.76
6 2 7 24.79 1.16
6 2 7 21.95 1.23
6 2 6 37.39 1.29
6 2 6 40.22 1.35
6 2 6 39.14 1.87
6 2 6 39.46 1.84
6 2 5 19.16 1.19
6 2 5 17.52 1.2
6 2 5 17.75 0.85
6 2 5 17.77 0.75
6 2 5 18.25 0.83
-6 -2 -4 63.01 1.67
-6 -2 -4 59.21 1.93
6 2 4 62.92 1.61
6 2 4 66.75 1.8
6 2 4 64.49 1.56
6 2 4 63.1 2.02
6 2 4 61.12 1.99
-6 -2 -3 104.2 2.62
-6 -2 -3 109.12 2.69
-6 -2 -3 108.46 2.79
-6 -2 -3 106.64 2.31
6 2 3 103.59 2.68
6 2 3 105.31 2.32
6 2 3 102.55 2.65
6 2 3 107.81 2.4
6 2 3 104.72 2.62
-6 -2 -2 593.81 12.59
-6 -2 -2 596.04 11.56
-6 -2 -2 583.34 11.21
-6 -2 -2 572.88 12.16
6 2 2 584.82 11.4
6 2 2 587.62 12.46
6 2 2 565.63 12.03
6 2 2 579.54 11.76
6 2 2 578.16 11.09
-6 -2 -1 333.82 7.24
-6 -2 -1 322.16 6.57
-6 -2 -1 321.5 6.75
6 2 1 323.57 6.34
6 2 1 316.76 6.45
6 2 1 323.14 7.12
6 2 1 316.33 6.7
6 2 1 321.61 6.43
6 2 1 314.34 6.88
-6 -2 0 165.52 3.54
-6 -2 0 163.42 3.51
-6 -2 0 162.83 3.5
-6 -2 0 162.61 3.71
-6 -2 0 159.99 3.64
-6 -2 0 167.11 3.93
6 2 0 183.13 4.27
6 2 0 180.11 3.84
6 2 0 175.01 3.79
6 2 0 172.94 3.96
6 2 0 181.09 4.05
6 2 0 186.61 3.82
-6 -2 1 204.62 4.3
-6 -2 1 214.19 4.88
-6 -2 1 204.27 4.53
-6 -2 1 202.72 4.43
-6 -2 1 210.28 4.5
-6 -2 1 197.5 4.34
6 2 -1 199.13 4.52
6 2 -1 205.49 4.5
6 2 -1 199.78 4.41
6 2 -1 210.93 4.36
6 2 -1 213.06 4.89
-6 -2 2 335.39 7.01
-6 -2 2 330.97 7.39
-6 -2 2 335.63 6.85
-6 -2 2 341.57 7.16
-6 -2 2 335.95 7.06
6 2 -2 322.08 7.26
6 2 -2 322.73 6.49
6 2 -2 315.32 6.65
6 2 -2 314.43 6.69
6 2 -2 313.07 6.76
-6 -2 3 531.68 10.81
-6 -2 3 523.61 11.02
-6 -2 3 526.93 11.52
-6 -2 3 525.83 10.91
-6 -2 3 527.15 11.72
-6 -2 3 539.23 10.53
6 2 -3 532.32 11.59
6 2 -3 523.12 10.65
6 2 -3 515.41 10.34
6 2 -3 524.17 10.79
6 2 -3 517.7 10.82
-6 -2 4 187.54 4.37
-6 -2 4 188.06 4.29
-6 -2 4 191.23 4.75
-6 -2 4 189.18 4.29
-6 -2 4 179.89 4.78
-6 -2 4 191.61 4.45
6 2 -4 192.95 4.61
6 2 -4 199.7 4.98
6 2 -4 202.31 4.46
6 2 -4 204.9 4.48
-6 -2 5 31.6 1.36
-6 -2 5 32.61 1.53
-6 -2 5 30.13 1.6
-6 -2 5 31.31 1.27
-6 -2 5 31.59 1.42
-6 -2 5 30.37 1.3
6 2 -5 32.13 1.47
6 2 -5 31.65 1.46
6 2 -5 31.88 1.34
-6 -2 6 40.69 1.62
-6 -2 6 39.71 1.84
-6 -2 6 42.3 1.62
-6 -2 6 40.52 1.66
-6 -2 6 40.38 2.03
-6 -2 6 42.52 1.8
6 2 -6 39.79 1.5
6 2 -6 38.72 1.58
6 2 -6 39.97 1.76
-6 -2 7 68.7 2.35
-6 -2 7 69.97 2.29
-6 -2 7 65.38 2.51
-6 -2 7 64.07 2.25
-6 -2 7 66.47 2.44
-6 -2 7 68.76 2.89
6 2 -7 67.22 2.46
6 2 -7 65.22 2.05
6 2 -7 65.43 2.16
-6 -2 8 25.02 1.69
-6 -2 8 28.97 2.19
-6 -2 8 24.7 1.57
-6 -2 8 21.76 1.55
-6 -2 8 21.63 1.67
6 2 -8 26.41 1.8
6 2 -8 21.24 1.45
6 2 -8 22.75 1.3
-6 -2 9 3.37 1.07
-6 -2 9 5.83 1.11
-6 -2 9 4.57 1.4
-6 -2 9 4.64 1.14
-6 -2 9 5.03 1.07
6 2 -9 5.08 0.87
6 2 -9 3.86 1.2
-6 -2 10 6.24 1.81
-6 -2 10 7.83 1.39
-6 -2 10 7.44 1.39
-6 -2 10 8.54 1.48
-6 -2 10 10.39 1.49
-6 -2 10 6.84 1.37
6 2 -10 7.81 1.15
6 2 -10 6.69 1.51
6 2 -10 8.31 1.02
-6 -2 11 0.33 1.94
-6 -2 11 1.68 1.56
-6 -2 11 2.31 1.45
-6 -2 11 1.78 1.31
-6 -2 11 1.91 1.51
-6 -2 11 1.65 1.49
-6 -2 11 2.64 1.56
6 2 -11 -0.21 1.78
-6 -2 12 5.1 1.96
-6 -2 12 6.77 2
-6 -2 12 6.15 2.59
-6 -2 12 4.77 1.69
-6 -2 12 11.24 2.3
5 3 11 2.25 1.21
5 3 11 6.49 2.06
5 3 11 4.81 2.19
5 3 11 5.86 1.91
5 3 10 1.82 1.44
5 3 10 3.74 1.63
5 3 10 5.38 1.68
5 3 10 2.71 1.03
5 3 9 1.46 1.25
5 3 9 0.95 1.07
5 3 9 0.15 0.77
5 3 9 3.3 1.17
5 3 8 15.65 1.22
5 3 8 18.86 1.7
5 3 8 18.89 1.84
5 3 8 14.77 1.66
5 3 7 59.24 2.37
5 3 7 53.99 1.85
5 3 7 54.87 2.43
5 3 7 58.61 2.42
5 3 6 1.2 0.64
5 3 6 2.26 0.55
5 3 6 1.78 0.67
5 3 6 3.01 0.76
5 3 5 20.26 1.18
5 3 5 18.33 1.13
5 3 5 20.7 1.27
5 3 5 19.57 0.96
5 3 4 58.45 1.87
5 3 4 58.26 1.88
5 3 4 63.63 2.09
-5 -3 -3 14.1 0.89
-5 -3 -3 9.99 0.6
5 3 3 11.47 0.89
5 3 3 12.48 0.58
5 3 3 12.77 0.8
5 3 3 11.55 0.63
5 3 3 12.55 0.7
-5 -3 -2 16.45 0.84
-5 -3 -2 17.01 0.77
-5 -3 -2 15.8 0.68
5 3 2 15.95 0.69
5 3 2 15.8 0.66
5 3 2 16.22 0.9
5 3 2 16.33 0.79
5 3 2 16.21 0.75
-5 -3 -1 155.42 3.65
-5 -3 -1 152.71 3.66
-5 -3 -1 153.84 3.36
-5 -3 -1 151.32 3.31
-5 -3 -1 151.66 3.33
5 3 1 165.35 3.87
5 3 1 159.54 3.82
5 3 1 162.81 3.46
5 3 1 164.13 3.49
5 3 1 159.9 3.59
-5 -3 0 668.13 13.98
-5 -3 0 673.05 13.11
-5 -3 0 686.73 13.17
-5 -3 0 709.63 14.73
-5 -3 0 691.74 14.02
-5 -3 0 663.45 13.85
5 3 0 665.46 12.77
5 3 0 672.67 14.33
5 3 0 668.41 13.65
5 3 0 656.3 12.8
5 3 0 674.76 13.14
5 3 0 642.63 13.51
-5 -3 1 105.95 2.6
-5 -3 1 104.38 2.42
-5 -3 1 104.64 2.55
-5 -3 1 108.17 2.83
-5 -3 1 105.77 2.6
-5 -3 1 104.37 2.57
-5 -3 1 96.33 2.51
5 3 -1 112.78 2.94
5 3 -1 106.78 2.64
5 3 -1 109.68 2.65
5 3 -1 112.31 2.71
5 3 -1 111.81 2.72
5 3 -1 107.67 2.68
-5 -3 2 86.01 2.25
-5 -3 2 83.63 2.28
-5 -3 2 86.35 2.49
-5 -3 2 85.9 2.36
-5 -3 2 81.2 2.25
-5 -3 2 85.77 2.27
5 3 -2 82.66 2.4
5 3 -2 79.5 2.19
5 3 -2 81.21 2.15
5 3 -2 79.02 2.14
5 3 -2 80.58 2.17
5 3 -2 79.23 2.24
-5 -3 3 53.58 1.71
-5 -3 3 55.03 1.7
-5 -3 3 54.54 1.76
-5 -3 3 53.05 1.76
-5 -3 3 52.5 1.86
-5 -3 3 57.14 1.94
5 3 -3 50.31 1.68
5 3 -3 47.99 1.77
5 3 -3 49.33 1.59
5 3 -3 50.16 1.57
5 3 -3 50.22 1.69
5 3 -3 55.76 1.87
-5 -3 4 255.98 6.22
-5 -3 4 261.74 5.77
-5 -3 4 256.92 5.77
-5 -3 4 246.07 6.2
-5 -3 4 248.48 5.76
-5 -3 4 258.19 5.67
5 3 -4 265.2 5.89
5 3 -4 260.73 5.94
5 3 -4 269.39 5.82
5 3 -4 270.49 6.46
-5 -3 5 104.72 2.95
-5 -3 5 107.74 3.01
-5 -3 5 105.38 3.22
-5 -3 5 109.47 2.96
-5 -3 5 104.57 2.91
-5 -3 5 105.18 3.35
5 3 -5 111.49 3.08
5 3 -5 113.86 3
5 3 -5 107.35 3.23
-5 -3 6 25.8 1.62
-5 -3 6 28.9 1.77
-5 -3 6 29.04 1.44
-5 -3 6 27.53 1.47
-5 -3 6 25.87 1.42
-5 -3 6 27.07 1.5
5 3 -6 30.5 1.59
5 3 -6 27.67 1.46
-5 -3 7 30.25 1.68
-5 -3 7 31.29 1.66
-5 -3 7 29.65 1.63
-5 -3 7 30.05 1.86
-5 -3 7 29.92 1.63
-5 -3 7 30.79 2.01
5 3 -7 28.9 1.75
5 3 -7 29.59 1.6
5 3 -7 27.81 1.42
-5 -3 8 15.37 1.96
-5 -3 8 17.75 1.74
-5 -3 8 13.48 1.53
-5 -3 8 19.36 1.57
-5 -3 8 18.43 1.63
5 3 -8 14.49 1.64
5 3 -8 15.94 1.23
5 3 -8 15.7 1.54
-5 -3 9 39.23 2.25
-5 -3 9 38.44 2.43
-5 -3 9 38.59 2.46
-5 -3 9 41.55 2.22
-5 -3 9 47.2 2.31
-5 -3 9 48.55 3.06
5 3 -9 35.09 1.99
5 3 -9 39.5 2.28
5 3 -9 39.75 1.85
-5 -3 10 4.86 1.4
-5 -3 10 6.1 1.42
-5 -3 10 6.43 1.44
-5 -3 10 7.5 1.49
-5 -3 10 9.26 1.49
-5 -3 10 6.94 1.45
-5 -3 10 8.86 1.97
5 3 -10 6.55 1.08
5 3 -10 5.22 1.2
5 3 -10 8.82 1.68
-5 -3 11 3.99 1.49
-5 -3 11 3.77 1.67
-5 -3 11 7.32 1.84
-5 -3 11 5.25 1.69
-5 -3 11 6.16 2.23
-5 -3 11 5.88 1.68
-5 -3 11 3.87 1.55
5 3 -11 4.31 1.24
5 3 -11 4.53 1.9
-5 -3 12 3.38 1.98
-5 -3 12 3.3 2.34
-5 -3 12 1.43 2.63
-5 -3 12 3.64 2.1
-5 -3 12 4.31 1.87
4 4 11 3.38 2.05
4 4 11 0.97 1.73
4 4 11 -0.41 1.8
4 4 11 5.46 1.28
4 4 10 5.48 1.48
4 4 10 7.87 1.83
4 4 10 9.13 1.68
4 4 10 5.26 1.18
4 4 9 10.53 1.58
4 4 9 11.36 1.48
4 4 9 10.73 1.47
4 4 9 9.4 1.54
4 4 8 11.58 1.58
4 4 8 11.39 1.43
4 4 8 10.04 1.23
4 4 8 13.29 1.56
4 4 7 6.1 1
4 4 7 7.73 1.13
4 4 7 6.8 1.06
4 4 7 6.64 0.87
4 4 6 41.96 1.8
4 4 6 43.78 1.95
4 4 6 43.65 1.89
4 4 6 42.67 1.61
4 4 5 106.41 2.89
4 4 5 107.25 3.12
4 4 5 103.82 2.97
4 4 5 105.43 2.75
4 4 4 10.2 0.83
4 4 4 10.14 0.82
4 4 4 9.09 0.88
-4 -4 -3 200 4.41
-4 -4 -3 202.54 4.51
4 4 3 210.11 4.66
4 4 3 195.51 4.56
4 4 3 206.2 4.44
4 4 3 204.3 4.9
4 4 3 209.29 4.18
-4 -4 -2 11.44 0.69
-4 -4 -2 11.67 0.88
-4 -4 -2 11.75 0.71
-4 -4 -2 10.56 0.64
4 4 2 11.8 0.62
4 4 2 13.16 0.72
4 4 2 13.37 0.73
4 4 2 11.86 0.7
4 4 2 13.19 0.7
4 4 2 12.76 0.86
-4 -4 -1 165.41 3.66
-4 -4 -1 169.99 4.02
-4 -4 -1 164.51 3.56
-4 -4 -1 170.92 4.07
-4 -4 -1 172.06 3.72
4 4 1 175.68 4.18
4 4 1 169.04 3.96
4 4 1 177.05 3.65
4 4 1 168.14 3.75
4 4 1 173.81 3.87
4 4 1 174.62 4.12
-4 -4 0 176.83 4.04
-4 -4 0 179.21 4.28
-4 -4 0 167.98 3.83
-4 -4 0 175.45 4.1
-4 -4 0 173.71 3.67
-4 -4 0 168.38 3.9
-4 -4 0 175.51 3.89
4 4 0 169.26 3.81
4 4 0 167.67 3.78
4 4 0 177.32 4.24
4 4 0 176.24 4.06
4 4 0 165.32 3.9
-4 -4 1 80.42 2.38
-4 -4 1 77.27 2.14
-4 -4 1 79.18 2.27
-4 -4 1 81.1 2.21
-4 -4 1 81.14 2.23
-4 -4 1 76.29 2.11
4 4 -1 80.89 2.21
4 4 -1 79.81 2.17
4 4 -1 83.48 2.28
4 4 -1 80.76 2.42
4 4 -1 83.89 2.28
4 4 -1 85.86 2.26
-4 -4 2 180.03 4.32
-4 -4 2 183.52 4.49
-4 -4 2 184.56 4.27
-4 -4 2 183.99 4.48
-4 -4 2 188.71 4.37
-4 -4 2 186.95 4.68
4 4 -2 169.08 4.36
4 4 -2 170.6 4.02
4 4 -2 172.94 4.02
4 4 -2 166.47 4.14
4 4 -2 165.11 4.04
4 4 -2 175.47 3.99
-4 -4 3 71.79 2.19
-4 -4 3 73.84 2.42
-4 -4 3 71.18 2.16
-4 -4 3 70.49 2.31
-4 -4 3 71.14 2.19
-4 -4 3 75.24 2.24
4 4 -3 76.25 2.45
4 4 -3 75.32 2.19
4 4 -3 81.58 2.34
4 4 -3 84.25 2.55
4 4 -3 73.14 2.27
4 4 -3 75.02 2.25
-4 -4 4 93.51 2.69
-4 -4 4 95.41 2.76
-4 -4 4 91.15 2.96
-4 -4 4 92.63 2.94
-4 -4 4 95.17 2.72
-4 -4 4 94.48 2.71
4 4 -4 95.18 2.75
4 4 -4 95.62 2.75
4 4 -4 97.15 3.03
4 4 -4 98.02 2.63
-4 -4 5 34.74 1.56
-4 -4 5 33.11 1.58
-4 -4 5 37.12 1.59
-4 -4 5 35.07 1.82
-4 -4 5 33.33 1.77
-4 -4 5 34.42 1.59
4 4 -5 34.39 1.63
4 4 -5 33.96 1.61
4 4 -5 35.44 1.49
4 4 -5 32.4 1.86
-4 -4 6 78.12 2.62
-4 -4 6 79.37 2.59
-4 -4 6 75.01 2.97
-4 -4 6 79.84 2.64
-4 -4 6 79.34 2.89
4 4 -6 75.29 2.54
4 4 -6 74.28 2.52
4 4 -6 76 2.4
4 4 -6 74.5 3
-4 -4 7 101.33 3.18
-4 -4 7 104.72 3.41
-4 -4 7 95.45 3.18
-4 -4 7 95.26 3.43
-4 -4 7 100.77 3.75
-4 -4 7 100.3 3.14
4 4 -7 103.04 3.24
-4 -4 8 10.13 1.36
-4 -4 8 10.44 1.34
-4 -4 8 8.57 1.3
-4 -4 8 8.09 1.58
-4 -4 8 10.38 1.46
-4 -4 8 10.5 1.27
4 4 -8 8.53 1.04
4 4 -8 6.74 1.2
-4 -4 9 11.35 1.52
-4 -4 9 13.14 1.53
-4 -4 9 14.72 1.99
-4 -4 9 13.48 2.03
-4 -4 9 12.17 1.77
-4 -4 9 14.03 1.86
-4 -4 9 10.05 1.56
4 4 -9 13.07 1.65
4 4 -9 11.4 1.25
4 4 -9 9.83 1.36
-4 -4 10 -0.51 1.65
-4 -4 10 2.22 1.29
-4 -4 10 0.26 1.3
-4 -4 10 1.15 1.31
-4 -4 10 2.17 1.42
-4 -4 10 1.67 1.43
-4 -4 10 2.39 1.47
4 4 -10 1.23 1.48
4 4 -10 2.89 1.12
4 4 -10 -0.21 1.23
-4 -4 11 12.59 2.07
-4 -4 11 18.6 2.97
-4 -4 11 13.45 2.09
-4 -4 11 13.31 1.78
-4 -4 11 15.87 2.25
-4 -4 11 13.22 2.12
-4 -4 11 17.22 2
4 4 -11 14.98 2.31
-4 -4 12 1.36 2.01
-4 -4 12 -0.31 2.21
-4 -4 12 -2.66 3
-4 -4 12 3.22 2.48
3 5 11 8.06 2.33
3 5 11 3.35 1.91
3 5 11 4.11 1.59
3 5 11 8.76 1.96
3 5 10 23.79 2.05
3 5 10 23.78 2.65
3 5 10 27.22 2.83
3 5 10 27.96 2.48
3 5 9 3.02 1.25
3 5 9 -0.23 1.11
3 5 9 2.67 1.02
3 5 9 3.19 1.12
3 5 8 6.21 1.08
3 5 8 5.3 1.05
3 5 8 1.94 1.11
3 5 8 4.13 0.94
3 5 7 6.76 1.06
3 5 7 6.24 0.98
3 5 7 9.58 1.15
3 5 7 6.17 1
3 5 6 198.79 5.04
3 5 6 189.58 4.94
3 5 6 191.55 4.65
3 5 6 190.6 4.63
3 5 5 71.26 2.18
3 5 5 78.92 2.53
3 5 5 70.47 2.3
3 5 4 56.55 1.73
3 5 4 57.91 1.79
3 5 4 56.8 2.01
-3 -5 -3 61.09 2.05
-3 -5 -3 60.65 1.73
-3 -5 -3 59.08 1.69
-3 -5 -3 60.97 1.7
3 5 3 55.07 1.51
3 5 3 54.32 1.44
3 5 3 52.3 1.54
3 5 3 55.7 1.9
3 5 3 53.73 1.51
-3 -5 -2 33.22 1.05
-3 -5 -2 31.82 1.38
-3 -5 -2 30.04 1.23
3 5 2 29.24 0.97
3 5 2 29.21 1.13
3 5 2 28.04 1.13
3 5 2 28.19 1.02
3 5 2 27.53 1.27
3 5 2 28.83 1.16
-3 -5 -1 232.47 5.49
-3 -5 -1 231.14 5.36
-3 -5 -1 228.66 4.97
-3 -5 -1 231.76 4.71
-3 -5 -1 233.13 5.05
3 5 1 221.2 5.27
3 5 1 220.25 4.91
3 5 1 220.13 4.5
3 5 1 220.24 4.83
3 5 1 225.1 5.18
3 5 1 219.6 5.04
3 5 1 220.46 4.79
-3 -5 0 32.54 1.34
-3 -5 0 31.98 1.26
-3 -5 0 30.91 1.02
-3 -5 0 30.52 1.37
-3 -5 0 30.91 1.16
-3 -5 0 32.31 1.1
3 5 0 35.56 1.45
3 5 0 34.59 1.38
3 5 0 33.63 1.4
3 5 0 35.52 1.27
3 5 0 35.71 1.2
3 5 0 34.34 1.34
-3 -5 1 43.59 1.64
-3 -5 1 46.38 1.66
-3 -5 1 45.02 1.54
-3 -5 1 46.95 1.79
-3 -5 1 44.92 1.63
-3 -5 1 44.93 1.53
3 5 -1 50.52 1.67
3 5 -1 53.69 1.77
3 5 -1 51.37 1.85
3 5 -1 52.6 1.69
3 5 -1 52.35 1.8
3 5 -1 49.08 1.73
-3 -5 2 18.43 1.49
-3 -5 2 14.61 1.07
-3 -5 2 14.56 1.05
-3 -5 2 13.92 1.05
-3 -5 2 12.15 0.92
-3 -5 2 12.57 0.93
3 5 -2 15.64 1.11
3 5 -2 18.13 1.06
3 5 -2 15.14 1.07
3 5 -2 13.95 0.91
3 5 -2 15.06 1.04
-3 -5 3 54.86 1.96
-3 -5 3 53.24 2.15
-3 -5 3 53.54 2.03
-3 -5 3 54.55 1.92
-3 -5 3 55.93 2.01
-3 -5 3 56.94 2.09
3 5 -3 56.88 1.98
3 5 -3 57.02 2.04
3 5 -3 58.48 1.89
3 5 -3 55.89 2.1
3 5 -3 54.29 1.85
3 5 -3 55.2 1.94
-3 -5 4 49 1.94
-3 -5 4 52.66 1.93
-3 -5 4 48.2 2.02
-3 -5 4 48.88 2.13
-3 -5 4 49.26 1.94
-3 -5 4 53.13 2.13
3 5 -4 51.63 1.99
3 5 -4 49.15 1.9
3 5 -4 49.71 1.79
-3 -5 5 19.56 1.35
-3 -5 5 23.88 1.67
-3 -5 5 25.71 1.47
-3 -5 5 23.62 1.42
-3 -5 5 23.68 1.54
-3 -5 5 20.26 1.52
3 5 -5 22.62 1.54
3 5 -5 24.23 1.71
3 5 -5 22.91 1.45
3 5 -5 23.69 1.32
-3 -5 6 96.88 3.16
-3 -5 6 96.05 3.08
-3 -5 6 100.4 3.12
-3 -5 6 98.69 3.47
-3 -5 6 95.32 3.5
-3 -5 6 98.05 3.3
3 5 -6 97.1 3.11
3 5 -6 94.5 3.54
3 5 -6 99.53 2.93
3 5 -6 95.61 3.04
-3 -5 7 11.76 1.41
-3 -5 7 13.95 1.66
-3 -5 7 11.61 1.48
-3 -5 7 13.76 1.79
-3 -5 7 13.05 1.68
-3 -5 7 13.74 1.52
3 5 -7 11.75 1.33
3 5 -7 11.58 1.38
-3 -5 8 6.08 1.46
-3 -5 8 6.46 1.31
-3 -5 8 3.89 1.22
-3 -5 8 5.18 1.13
-3 -5 8 5.74 1.24
-3 -5 8 6.44 1.31
-3 -5 8 5.1 1.23
3 5 -8 6.75 1.18
-3 -5 9 1.09 1.13
-3 -5 9 3.41 1.31
-3 -5 9 0.05 1.26
-3 -5 9 3.75 1.49
-3 -5 9 1.38 1.33
-3 -5 9 1.96 1.16
-3 -5 9 1.01 1.47
3 5 -9 2.61 0.94
3 5 -9 1.98 1.29
3 5 -9 2.79 1.26
-3 -5 10 12.6 2.03
-3 -5 10 19.33 2.33
-3 -5 10 16.83 2.4
-3 -5 10 18.52 2.22
-3 -5 10 15.09 2.04
-3 -5 10 19.73 2.22
-3 -5 10 20.87 2.23
3 5 -10 15.48 1.72
-3 -5 11 3.02 2.03
-3 -5 11 7.98 2.16
-3 -5 11 6.3 2
-3 -5 11 10.1 2.82
-3 -5 11 4.45 1.96
3 5 -11 7.2 2.2
2 6 11 0 2.17
2 6 11 4.1 1.7
2 6 11 -0.95 1.96
2 6 11 -1.24 1.78
2 6 10 2.98 1.66
2 6 10 3.98 1.35
2 6 10 3.89 1.53
2 6 10 1.44 1.46
2 6 9 20.96 2.16
2 6 9 20.4 1.81
2 6 9 18.84 1.95
2 6 9 18.12 2.01
2 6 8 49.22 2.45
2 6 8 52.43 2.46
2 6 8 50.71 2.32
2 6 8 50.91 2.25
2 6 7 35.72 1.76
2 6 7 34.56 1.85
2 6 7 35.11 1.8
2 6 7 37.8 1.98
2 6 6 11.3 1.24
2 6 6 10.47 1.08
2 6 6 11.25 1.2
2 6 6 11.44 1.23
2 6 5 16.97 1.27
2 6 5 20.75 1.19
2 6 5 18.9 1.07
2 6 4 198.5 4.16
2 6 4 195.23 4.27
2 6 4 201.26 4.93
2 6 4 193.45 4.36
2 6 4 193.79 4.27
2 6 4 200.33 4.09
-2 -6 -3 158.14 4.08
-2 -6 -3 156.18 3.83
2 6 3 159.44 4
2 6 3 155.44 3.5
2 6 3 151.58 3.31
2 6 3 150.21 3.63
2 6 3 146.88 3.5
2 6 3 157.5 3.39
-2 -6 -2 25.83 0.87
-2 -6 -2 24.75 1.3
-2 -6 -2 25.28 1.2
-2 -6 -2 24.36 1.26
2 6 2 26.16 1.05
2 6 2 24.06 1.13
2 6 2 24.7 1.02
2 6 2 26.33 0.87
2 6 2 25.93 1.21
2 6 2 25.06 1.02
2 6 2 26.62 1.27
-2 -6 -1 73.73 2.02
-2 -6 -1 73.43 2.33
-2 -6 -1 74.04 1.75
-2 -6 -1 71.48 1.93
-2 -6 -1 70.36 2.27
2 6 1 78.16 2.37
2 6 1 77.79 2.12
2 6 1 78.26 2.12
2 6 1 78.49 2.39
2 6 1 78.42 2.26
2 6 1 77.11 2.18
-2 -6 0 155.14 3.94
-2 -6 0 151.84 3.69
-2 -6 0 154.35 3.31
-2 -6 0 155.53 4.12
-2 -6 0 153.91 3.83
-2 -6 0 147.63 3.7
2 6 0 152.4 3.73
2 6 0 150.92 3.58
2 6 0 150.51 3.74
2 6 0 151.37 3.74
2 6 0 151.71 3.94
2 6 0 152.58 3.9
-2 -6 1 284.47 6.33
-2 -6 1 281.39 6.85
-2 -6 1 279.2 6.47
-2 -6 1 275 6.48
-2 -6 1 277.55 6.44
2 6 -1 305.96 6.97
2 6 -1 295.92 6.57
2 6 -1 291.13 6.82
2 6 -1 297.92 6.72
2 6 -1 296.56 6.39
2 6 -1 303.34 6.87
-2 -6 2 20.84 1.4
-2 -6 2 19.7 1.29
-2 -6 2 20.66 1.29
-2 -6 2 20.89 1.2
-2 -6 2 22.98 1.23
2 6 -2 22.71 1.34
2 6 -2 23.71 1.34
2 6 -2 23.57 1.17
2 6 -2 21.96 1.34
2 6 -2 20.89 1.24
2 6 -2 22.96 1.16
-2 -6 3 26.12 1.48
-2 -6 3 30.42 1.55
-2 -6 3 28.87 1.69
-2 -6 3 28.06 1.52
-2 -6 3 27.83 1.45
2 6 -3 29.63 1.62
2 6 -3 29.86 1.54
2 6 -3 29.58 1.36
2 6 -3 29.21 1.58
2 6 -3 28.2 1.35
2 6 -3 30.22 1.48
-2 -6 4 26.75 1.59
-2 -6 4 27.23 1.62
-2 -6 4 27.27 1.76
-2 -6 4 26.94 1.64
-2 -6 4 26.96 1.51
2 6 -4 28.85 1.42
2 6 -4 28.29 1.58
2 6 -4 26.69 1.73
2 6 -4 27.57 1.64
-2 -6 5 12.98 1.56
-2 -6 5 13.02 1.4
-2 -6 5 13.39 1.42
-2 -6 5 14.15 1.35
-2 -6 5 13.37 1.4
2 6 -5 12.57 1.56
2 6 -5 12.4 1.35
2 6 -5 12.62 1.13
2 6 -5 10.72 1.23
-2 -6 6 11.02 1.61
-2 -6 6 15.46 1.59
-2 -6 6 19.09 1.62
-2 -6 6 15.91 1.86
-2 -6 6 17.54 1.7
-2 -6 6 17.3 1.63
2 6 -6 18.25 1.94
2 6 -6 16.6 1.7
2 6 -6 15.94 1.32
2 6 -6 16.49 1.62
-2 -6 7 18.11 1.89
-2 -6 7 19.32 1.85
-2 -6 7 16.04 1.73
-2 -6 7 15.9 2.05
-2 -6 7 20.42 2.07
-2 -6 7 14.69 1.96
2 6 -7 17.46 1.88
2 6 -7 21.93 1.61
2 6 -7 18.28 1.78
-2 -6 8 48.09 2.58
-2 -6 8 50.34 2.95
-2 -6 8 52.4 3.17
-2 -6 8 52.82 2.8
-2 -6 8 49.14 2.73
-2 -6 8 46.55 2.97
2 6 -8 46.3 2.54
2 6 -8 50.36 2.44
-2 -6 9 2.73 1.61
-2 -6 9 2.91 1.52
-2 -6 9 2.62 1.7
-2 -6 9 1.69 1.5
-2 -6 9 5.54 1.44
-2 -6 9 2.26 1.42
2 6 -9 4.12 1.48
2 6 -9 2.86 1.47
-2 -6 10 1.79 1.73
-2 -6 10 2.99 1.77
-2 -6 10 1.3 1.92
-2 -6 10 -0.19 1.9
-2 -6 10 2.63 1.77
-2 -6 10 1.55 2.06
2 6 -10 2.57 1.34
-2 -6 11 3.51 2.62
-2 -6 11 3.38 2.17
-2 -6 11 1.5 2.17
-2 -6 11 3.09 2.17
2 6 -11 -3.81 2.14
1 7 11 1.54 1.87
1 7 11 0.14 2.14
1 7 11 3.71 1.95
1 7 11 -0.08 1.89
1 7 10 1.47 1.72
1 7 10 0.73 1.54
1 7 10 3.34 1.49
1 7 10 1.69 1.4
1 7 9 13.38 1.7
1 7 9 8.42 1.34
1 7 9 13.1 1.58
1 7 9 10.88 1.49
1 7 8 3.11 1.03
1 7 8 4.06 0.97
1 7 8 2.36 1.08
1 7 8 1.52 1.04
1 7 7 18.29 1.56
1 7 7 17.46 1.6
1 7 7 14.64 1.52
1 7 7 16.16 1.37
1 7 6 24.49 1.34
1 7 6 28.28 1.56
1 7 6 26.43 1.61
1 7 5 91.22 2.25
1 7 5 84.64 2.83
1 7 5 88.43 2.37
1 7 5 89.5 2.18
1 7 5 89.64 2.33
-1 -7 -4 85.68 2.8
-1 -7 -4 85.41 2.37
-1 -7 -4 86.89 2.34
1 7 4 86.91 2.14
1 7 4 81.39 2.35
1 7 4 82.52 2.06
1 7 4 85.42 2.26
1 7 4 84.95 2.71
1 7 4 82.35 2.2
-1 -7 -3 59.51 2.17
-1 -7 -3 59.06 1.98
1 7 3 62.35 2.04
1 7 3 63.42 2.23
1 7 3 64.59 1.98
1 7 3 61.14 1.97
1 7 3 61.97 1.85
1 7 3 65.22 1.82
-1 -7 -2 135.81 3.73
-1 -7 -2 136.38 3.78
-1 -7 -2 139.83 3.74
1 7 2 132.24 3.66
1 7 2 135.78 3.39
1 7 2 137.51 3.25
1 7 2 133.59 3.57
1 7 2 135.96 3.42
1 7 2 138.32 3.43
-1 -7 -1 126.16 3.49
-1 -7 -1 122.33 3.07
-1 -7 -1 127.07 3.59
-1 -7 -1 127.61 3.67
-1 -7 -1 127.71 2.7
-1 -7 -1 122.09 3.16
1 7 1 127.3 3.39
1 7 1 134.09 3.48
1 7 1 135.81 3.3
1 7 1 136.28 3.65
1 7 1 134.15 3.66
1 7 1 135.68 3.44
-1 -7 0 171.96 4.3
-1 -7 0 179.15 3.82
-1 -7 0 179.46 4.46
-1 -7 0 181.81 4.42
-1 -7 0 183.44 4.92
-1 -7 0 182.38 4.61
-1 -7 0 179.46 4.82
1 7 0 173.65 4.3
1 7 0 172.05 4.25
1 7 0 172.26 4.31
1 7 0 170.25 4.42
1 7 0 171.89 4.5
1 7 0 170.75 4.07
-1 -7 1 117.27 3.42
-1 -7 1 119.85 3.27
-1 -7 1 121.26 3.32
-1 -7 1 120.88 3.66
-1 -7 1 121.26 3.43
1 7 -1 120.57 3.15
1 7 -1 121.51 3.36
1 7 -1 116.19 3.34
1 7 -1 116.97 3.51
1 7 -1 118.32 3.25
1 7 -1 114.92 3.35
-1 -7 2 87.24 2.72
-1 -7 2 92.51 2.89
-1 -7 2 86.43 2.87
-1 -7 2 86.33 2.8
-1 -7 2 87.94 3.05
1 7 -2 89.43 2.82
1 7 -2 88.67 2.81
1 7 -2 90.36 2.63
1 7 -2 87.52 2.88
1 7 -2 89.43 2.87
1 7 -2 84.87 2.67
-1 -7 3 61.65 2.25
-1 -7 3 57.51 2.34
-1 -7 3 55.38 2.48
-1 -7 3 57.6 2.31
-1 -7 3 59.68 2.35
1 7 -3 67.23 2.25
1 7 -3 61.14 2.14
1 7 -3 59.9 2.29
1 7 -3 64.19 2.53
1 7 -3 62.94 2.36
1 7 -3 60.67 2.42
-1 -7 4 15.89 1.54
-1 -7 4 19.29 1.74
-1 -7 4 22.48 1.6
-1 -7 4 17.61 1.56
-1 -7 4 19.29 1.58
-1 -7 4 22.44 1.52
1 7 -4 19.72 1.55
1 7 -4 18.64 1.3
1 7 -4 18.84 1.61
1 7 -4 21.14 1.75
-1 -7 5 87.7 3.3
-1 -7 5 88 3.03
-1 -7 5 88.04 3.25
-1 -7 5 82.1 3.1
-1 -7 5 80.87 3.35
-1 -7 5 82.39 3.35
1 7 -5 88.91 3.22
1 7 -5 96.13 3.13
1 7 -5 89.55 2.89
-1 -7 6 12.7 1.72
-1 -7 6 13.45 1.84
-1 -7 6 13.96 1.93
-1 -7 6 12.59 1.7
-1 -7 6 13.95 1.69
-1 -7 6 13.65 1.68
1 7 -6 12.87 1.57
1 7 -6 13.55 1.68
1 7 -6 11.63 1.31
1 7 -6 14.15 1.97
-1 -7 7 8.38 1.6
-1 -7 7 10.01 1.48
-1 -7 7 6.48 1.46
-1 -7 7 5.95 1.4
-1 -7 7 10.65 1.52
-1 -7 7 9.3 1.56
1 7 -7 8.23 1.51
1 7 -7 8.92 1.27
1 7 -7 8.54 1.59
-1 -7 8 7.54 1.66
-1 -7 8 5.79 1.65
-1 -7 8 6.8 1.64
-1 -7 8 9.34 1.72
-1 -7 8 8.63 1.82
-1 -7 8 6.7 1.56
1 7 -8 8.27 1.58
1 7 -8 7.36 1.37
1 7 -8 5.35 1.57
-1 -7 9 -0.68 1.65
-1 -7 9 -1.42 1.62
-1 -7 9 5.75 1.95
-1 -7 9 0.38 1.66
-1 -7 9 1.9 1.54
-1 -7 9 0.72 1.75
1 7 -9 0.6 1.4
-1 -7 10 8.88 2.44
-1 -7 10 8.71 2.47
-1 -7 10 7.36 2.13
-1 -7 10 7.02 2.27
-1 -7 10 5.34 2.15
1 7 -10 9.21 2.18
-1 -7 11 0.64 2.32
-1 -7 11 2.5 2.43
-1 -7 11 1.44 2.82
0 8 10 1.01 1.46
0 8 10 3.79 1.99
0 8 10 6.92 1.73
0 8 10 1.57 1.49
0 8 9 8.49 1.59
0 8 9 7.04 1.42
0 8 9 8.08 1.68
0 8 9 7.08 1.27
0 8 8 7.49 1.41
0 8 8 8.73 1.43
0 8 8 8.28 1.08
0 8 7 62.31 2.57
0 8 7 62.85 2.08
0 8 7 59.13 2.53
0 8 7 63.13 2.64
0 8 6 11.99 1.46
0 8 6 11.72 0.93
0 8 6 10.99 1.17
0 8 6 12.61 1.02
0 8 5 14.72 0.9
0 8 5 16.85 1.3
0 8 5 14.32 0.97
0 8 5 13.55 1.31
0 8 5 14.17 1.03
0 -8 -4 5.79 1
0 -8 -4 5.77 0.79
0 -8 -4 6.45 0.92
0 8 4 6.06 0.85
0 8 4 7.34 1.04
0 8 4 7.86 0.84
0 8 4 7.32 0.94
0 8 4 6.61 0.75
0 -8 -3 136.25 3.74
0 -8 -3 133.55 3.8
0 -8 -3 139.65 3.89
0 8 3 136.09 3.34
0 8 3 135.95 3.48
0 8 3 145.32 3.61
0 8 3 134.47 3.83
0 8 3 137.5 3.65
0 8 3 135.47 3.72
0 -8 -2 274.2 6.57
0 -8 -2 265.32 6.39
0 -8 -2 263.11 5.68
0 -8 -2 266.14 6.61
0 -8 -2 252.66 5.61
0 8 2 257.04 6.12
0 8 2 258.32 6
0 8 2 255.79 6.24
0 8 2 258.65 5.94
0 8 2 263.51 5.73
0 8 2 270.54 6.34
0 -8 -1 49.08 2.1
0 -8 -1 49.95 2.05
0 -8 -1 45.75 1.63
0 -8 -1 46.66 1.67
0 -8 -1 48.61 2.09
0 8 1 44.82 1.9
0 8 1 44.46 1.65
0 8 1 45.01 1.93
0 8 1 45.39 2.03
0 8 1 44.55 1.72
0 8 1 43.5 1.77
0 -8 0 41.63 1.28
0 -8 0 41.56 1.71
0 -8 0 41.8 1.67
0 -8 0 41.46 1.99
0 -8 0 38.94 1.89
0 -8 0 40.17 1.65
0 -8 0 42.32 2.03
0 8 0 41.85 1.65
0 8 0 39.35 1.97
0 8 0 40.41 1.8
0 8 0 40.87 1.68
0 8 0 41.12 1.9
0 8 0 39.69 1.77
0 -8 1 46.85 2.15
0 -8 1 42.09 1.79
0 -8 1 49.23 2.1
0 -8 1 44.28 1.92
0 -8 1 42.49 1.83
0 -8 1 42.74 2.17
0 8 -1 44.48 1.76
0 8 -1 41.7 1.77
0 8 -1 41.73 1.89
0 8 -1 42.4 2.11
0 8 -1 43.19 2.03
0 8 -1 44.1 1.94
0 -8 2 261.85 6.58
0 -8 2 261.53 6.94
0 -8 2 264.28 7.09
0 -8 2 270.11 6.4
0 -8 2 258.88 6.57
0 -8 2 266.23 6.55
0 8 -2 259.37 6.48
0 8 -2 262.14 6.36
0 8 -2 265.42 6.35
0 8 -2 256.55 6.34
0 8 -2 265.49 6.64
0 8 -2 263.71 6.68
0 8 -2 263.08 6.07
0 -8 3 140.73 4.15
0 -8 3 140.21 4.11
0 -8 3 137.91 4.36
0 -8 3 136.74 4.44
0 -8 3 113.39 3.74
0 8 -3 141.22 4.14
0 8 -3 140.72 3.86
0 8 -3 143.19 4.2
0 8 -3 143.97 4.12
0 8 -3 143.87 4.36
0 -8 4 4.18 1.11
0 -8 4 4.43 1.24
0 -8 4 4.6 1.04
0 -8 4 5.54 1.1
0 -8 4 3.34 0.9
0 -8 4 4.13 1.01
0 8 -4 5.5 1.16
0 8 -4 7.6 1.4
0 8 -4 5.72 0.97
0 8 -4 4.51 1.11
0 -8 5 13.2 1.81
0 -8 5 15.85 1.79
0 -8 5 13.98 1.67
0 -8 5 11.2 1.6
0 -8 5 14.51 1.93
0 -8 5 14.7 1.75
0 8 -5 12.32 1.31
0 8 -5 12.39 1.64
0 8 -5 15.11 2.06
0 8 -5 13.54 1.7
0 -8 6 9.29 1.57
0 -8 6 8.98 1.64
0 -8 6 9.66 1.58
0 -8 6 10.83 1.79
0 -8 6 9.33 1.52
0 -8 6 10.76 1.56
0 8 -6 10.5 1.35
0 8 -6 11.15 1.85
0 8 -6 7.84 1.42
0 8 -6 12.88 1.57
0 -8 7 55.39 3.5
0 -8 7 59.93 3.2
0 -8 7 65.6 3.33
0 -8 7 66.19 3.44
0 -8 7 54.64 3.36
0 -8 7 54.43 2.95
0 8 -7 57.68 3.19
0 8 -7 65.23 3.76
0 8 -7 60.28 2.59
0 8 -7 61.73 2.98
0 -8 8 8.38 1.8
0 -8 8 8.93 1.95
0 -8 8 6.88 1.67
0 -8 8 3.58 1.66
0 -8 8 4.19 1.77
0 -8 8 6.8 1.82
0 8 -8 6.37 2.15
0 8 -8 3 1.69
0 8 -8 7.86 1.73
0 8 -8 5.14 1.25
0 -8 9 3.23 1.91
0 -8 9 6.52 2.03
0 -8 9 7.15 2.04
0 -8 9 6.66 2.32
0 -8 9 6.51 1.86
0 8 -9 4.69 1.54
0 -8 10 2.66 2.23
0 -8 10 -0.85 2.43
0 -8 10 1.97 2.26
0 8 -10 5.58 2.33
-1 9 10 0.43 1.79
-1 9 10 1.65 1.77
-1 9 10 4.27 1.98
-1 9 10 0.63 1.31
-1 9 9 1.84 1.55
-1 9 9 -0.8 1.31
-1 9 9 1.46 1.07
-1 9 9 1.28 1.63
-1 9 8 9.02 1.48
-1 9 8 9.24 1.01
-1 9 8 9.51 1.55
-1 9 8 9.21 1.58
-1 9 7 12.4 1.48
-1 9 7 9.65 1.23
-1 9 7 11.2 1.11
-1 9 7 9.24 1.31
-1 9 7 11.71 1.53
-1 9 7 12.8 1.11
-1 9 6 0.83 0.86
-1 9 6 2.99 0.73
-1 9 6 2.45 0.94
-1 9 6 1.9 0.61
1 -9 -5 50.71 2.49
1 -9 -5 63.22 1.96
-1 9 5 69.6 2.18
-1 9 5 67.87 2.49
-1 9 5 68.5 2.21
-1 9 5 67.17 2.01
-1 9 5 67.44 2.61
1 -9 -4 18.28 1.64
1 -9 -4 18.91 1.47
-1 9 4 16.76 1.58
-1 9 4 16.57 1.48
-1 9 4 19.13 1.22
-1 9 4 18.01 1.48
-1 9 4 17.45 1.13
-1 9 4 17.06 1.43
1 -9 -3 25.82 1.71
1 -9 -3 29.11 1.7
1 -9 -3 28.22 1.79
-1 9 3 35.12 1.93
-1 9 3 32.21 1.77
-1 9 3 33.77 1.47
-1 9 3 32.89 1.73
-1 9 3 33.28 1.76
-1 9 3 33.49 1.52
1 -9 -2 4.82 0.59
1 -9 -2 6.14 1.04
1 -9 -2 3.99 1
1 -9 -2 4.99 0.89
1 -9 -2 5.63 0.65
-1 9 2 5.31 1.05
-1 9 2 3.98 0.83
-1 9 2 3.9 0.68
-1 9 2 5.31 0.93
-1 9 2 4.17 0.9
-1 9 2 4.2 0.73
1 -9 -1 209.03 5.45
1 -9 -1 206.02 5.72
1 -9 -1 209.18 4.95
1 -9 -1 210.82 5.06
-1 9 1 205.07 5.19
-1 9 1 209.73 5.28
-1 9 1 202.87 5.34
-1 9 1 206.57 5.47
-1 9 1 206.03 4.91
-1 9 1 202.21 5.13
1 -9 0 227.57 6.14
1 -9 0 224.68 5.51
1 -9 0 223.49 4.62
1 -9 0 228.4 5.76
1 -9 0 225.49 5.38
1 -9 0 187.21 5.83
-1 9 0 232.74 5.83
-1 9 0 238.8 6
-1 9 0 230.93 5.76
-1 9 0 235.19 6.13
-1 9 0 234.44 5.52
-1 9 0 230.47 5.93
1 -9 1 46.66 2.49
1 -9 1 46.12 2.3
1 -9 1 50.94 2.18
1 -9 1 50.92 2.46
1 -9 1 55.02 2.17
1 -9 1 49.26 2.07
-1 9 -1 48.2 2.18
-1 9 -1 47.53 2.37
-1 9 -1 51.16 2.28
-1 9 -1 47.07 1.95
-1 9 -1 51.43 2.07
-1 9 -1 48.18 2.45
1 -9 2 36.69 2.1
1 -9 2 36 2.17
1 -9 2 39.1 2.37
1 -9 2 29.88 1.8
1 -9 2 33.47 1.94
1 -9 2 38.26 1.89
-1 9 -2 34.62 1.72
-1 9 -2 33.9 1.89
-1 9 -2 34.23 2.15
-1 9 -2 35.78 2.25
-1 9 -2 36.86 2.13
1 -9 3 54.67 2.82
1 -9 3 52.55 2.45
1 -9 3 56 2.62
1 -9 3 57.39 2.52
1 -9 3 55.15 2.8
1 -9 3 53.36 2.52
-1 9 -3 47.49 2.58
-1 9 -3 56.17 2.22
-1 9 -3 55.84 2.69
-1 9 -3 54.71 2.55
1 -9 4 105.87 3.79
1 -9 4 107.43 3.83
1 -9 4 109 4.15
1 -9 4 111.46 3.88
1 -9 4 105.86 4.1
-1 9 -4 107 3.85
-1 9 -4 105.78 3.37
-1 9 -4 110.12 4.03
-1 9 -4 103.31 3.64
1 -9 5 38.58 2.78
1 -9 5 39.7 2.8
1 -9 5 45.98 2.67
1 -9 5 45.27 2.72
1 -9 5 44.63 2.69
-1 9 -5 45.86 2.96
-1 9 -5 43.62 2.16
-1 9 -5 44.04 2.5
-1 9 -5 42.16 2.75
1 -9 6 16.17 2.25
1 -9 6 15.64 2.07
1 -9 6 11.54 1.82
1 -9 6 13.33 1.88
1 -9 6 15.26 2.16
-1 9 -6 9.31 1.78
-1 9 -6 11.9 1.73
-1 9 -6 12.38 1.8
-1 9 -6 11.04 1.33
1 -9 7 5.27 1.53
1 -9 7 3.6 1.59
1 -9 7 4.14 1.63
1 -9 7 4.81 1.71
1 -9 7 5.44 1.83
1 -9 7 3.49 1.56
-1 9 -7 5.47 1.6
-1 9 -7 2.83 1.7
-1 9 -7 3.38 1.01
-1 9 -7 6.87 2.1
1 -9 8 13.46 2.24
1 -9 8 11.09 2.3
1 -9 8 7.41 2.11
1 -9 8 10.6 2.37
1 -9 8 8.43 1.94
1 -9 8 12.85 2.22
-1 9 -8 11.74 1.7
-1 9 -8 7.21 2.22
1 -9 9 18.15 2.63
1 -9 9 12.79 2.66
1 -9 9 15.03 2.87
1 -9 9 16.68 2.77
-1 9 -9 14.18 2.45
-1 9 -9 9.17 1.91
1 -9 10 0.12 2.5
1 -9 10 0.11 2.9
1 -9 10 4.18 2.76
-2 10 10 11.11 2.23
-2 10 10 5.44 2.09
-2 10 10 7.96 1.99
-2 10 9 0.59 1.76
-2 10 9 2.32 1.61
-2 10 9 0.21 1.67
-2 10 8 14.24 1.54
-2 10 8 12.45 1.62
-2 10 8 11.33 2.02
-2 10 8 10.84 1.6
-2 10 7 3.73 1.29
-2 10 7 3.44 0.84
-2 10 7 5.05 1.24
-2 10 6 9.37 1.04
-2 10 6 8.84 1.42
-2 10 6 9.38 1.42
-2 10 6 9.04 1.26
-2 10 6 9.49 1.09
2 -10 -5 20.33 1.52
2 -10 -5 20.2 1.92
2 -10 -5 18.97 1.41
-2 10 5 21.82 1.45
-2 10 5 18.57 1.29
-2 10 5 20.85 1.84
-2 10 5 17.39 1.93
-2 10 5 23.05 1.79
-2 10 5 19.72 1.58
2 -10 -4 9.94 1.38
2 -10 -4 13.01 1.57
2 -10 -4 10.28 1.29
-2 10 4 11.73 1.37
-2 10 4 13.93 1.65
-2 10 4 10.38 1.11
-2 10 4 12.11 1.26
-2 10 4 10.41 1.3
-2 10 4 11.46 1.52
2 -10 -3 62.79 2.67
2 -10 -3 63.25 2.61
2 -10 -3 61.28 2.67
-2 10 3 62.66 2.52
-2 10 3 60.18 2.11
-2 10 3 57.49 2.69
-2 10 3 60.06 2.47
-2 10 3 62.39 2.26
-2 10 3 61.1 2.51
2 -10 -2 5.75 1.13
2 -10 -2 5.81 1.18
2 -10 -2 5.37 0.7
2 -10 -2 4.8 1.13
2 -10 -2 5.92 0.82
-2 10 2 8.38 1.2
-2 10 2 7.77 1.21
-2 10 2 7.46 1.22
-2 10 2 6.42 0.92
-2 10 2 6.24 1.23
-2 10 2 6.57 0.96
2 -10 -1 70.88 2.38
2 -10 -1 76.22 2.91
2 -10 -1 72.26 3.05
2 -10 -1 73.68 2.43
2 -10 -1 68.71 2.91
-2 10 1 74.17 3.06
-2 10 1 75.53 2.82
-2 10 1 73.76 2.82
-2 10 1 73.97 2.62
-2 10 1 75.34 2.52
-2 10 1 70.21 2.86
2 -10 0 11.16 1.48
2 -10 0 11.47 1.27
2 -10 0 14.09 1.81
2 -10 0 13.55 1.55
2 -10 0 12.12 0.89
2 -10 0 12.88 1.38
-2 10 0 10.71 1.33
-2 10 0 12.36 1.19
-2 10 0 13.43 1.71
-2 10 0 11.24 1.47
-2 10 0 9.23 1.18
-2 10 0 13.63 1.87
2 -10 1 78.3 3.36
2 -10 1 75.38 3.11
2 -10 1 78.58 3.29
2 -10 1 78.05 2.86
2 -10 1 81.81 2.94
-2 10 -1 78.42 3.07
-2 10 -1 74.34 2.93
-2 10 -1 74.24 3.24
-2 10 -1 75.87 3.14
-2 10 -1 75.61 2.65
2 -10 2 35.56 2.38
2 -10 2 37.48 2.37
2 -10 2 32.63 2.05
2 -10 2 39.59 2.6
2 -10 2 36.78 2.11
2 -10 2 34.25 2.01
-2 10 -2 33.96 2.41
-2 10 -2 32.99 2.31
-2 10 -2 35.3 1.85
-2 10 -2 37.37 2.08
2 -10 3 28.12 2
2 -10 3 27.81 2.14
2 -10 3 27.32 2.48
2 -10 3 27.14 2.2
2 -10 3 27.53 2.03
-2 10 -3 24.96 2.29
-2 10 -3 24.85 1.67
-2 10 -3 25.41 2.33
-2 10 -3 23.21 2.13
2 -10 4 63.69 3.03
2 -10 4 60.63 3.4
2 -10 4 62.18 3.33
2 -10 4 60.49 3.04
-2 10 -4 58.86 3.19
-2 10 -4 58.19 3.27
-2 10 -4 57.53 2.94
-2 10 -4 58.02 2.53
2 -10 5 17.14 2.16
2 -10 5 18.79 2.64
2 -10 5 21.2 2.34
2 -10 5 17.97 2.41
2 -10 5 18.47 2.27
-2 10 -5 20.28 2.62
-2 10 -5 18.42 2.26
-2 10 -5 18.02 1.72
-2 10 -5 19.81 2.33
2 -10 6 30.61 2.84
2 -10 6 27 3.13
2 -10 6 22.53 2.84
2 -10 6 22.5 2.63
2 -10 6 25.51 2.96
-2 10 -6 22 2.04
-2 10 -6 21.99 3.02
-2 10 -6 28.33 2.98
2 -10 7 11.4 2.22
2 -10 7 10.26 2.25
2 -10 7 10.23 2.33
2 -10 7 10.97 2.09
2 -10 7 11.54 2.25
2 -10 7 9.02 1.97
-2 10 -7 11.54 1.61
-2 10 -7 10.35 2.19
-2 10 -7 9.61 2.65
2 -10 8 11.6 2.34
2 -10 8 5.83 2.84
2 -10 8 11.89 2.41
2 -10 8 9.19 2.54
-2 10 -8 7.38 1.77
-2 10 -8 7.95 2.25
2 -10 9 18.03 2.9
2 -10 9 14.31 3.06
2 -10 9 13.41 2.76
2 -10 9 10.78 3.09
-2 10 -9 12.71 2.7
-3 11 9 1.86 1.83
-3 11 9 1.18 1.85
-3 11 9 3.87 2.01
-3 11 8 3.24 1.81
-3 11 8 5.24 1.58
-3 11 8 6.21 1.55
-3 11 8 5.19 1.72
-3 11 7 11.06 1.59
-3 11 7 6.65 1.86
-3 11 7 10.74 1.95
-3 11 6 31.29 2.59
-3 11 6 32.36 1.82
-3 11 6 36.69 2.3
-3 11 6 31.55 1.68
-3 11 6 35.21 2.58
3 -11 -5 9.15 1.32
3 -11 -5 8.64 1.13
3 -11 -5 8.27 1.57
-3 11 5 6.42 1.02
-3 11 5 9.94 1.34
-3 11 5 10.59 1.7
-3 11 5 8.54 1.61
-3 11 5 10.31 1.45
-3 11 5 10.62 1.31
3 -11 -4 18.26 2.02
3 -11 -4 16.66 1.99
3 -11 -4 16.32 1.9
-3 11 4 17.43 1.98
-3 11 4 19.37 1.78
-3 11 4 21.93 1.56
-3 11 4 20.21 2.27
-3 11 4 20.76 1.52
-3 11 4 21.88 2.06
3 -11 -3 11.32 1.53
3 -11 -3 14.11 1.88
3 -11 -3 10.55 1.42
-3 11 3 14.31 1.61
-3 11 3 12.24 1.39
-3 11 3 12.58 1.72
-3 11 3 14.68 1.86
-3 11 3 10.99 1.32
-3 11 3 10.83 1.44
3 -11 -2 13.7 1.15
3 -11 -2 12.03 1.06
3 -11 -2 9.75 1.5
3 -11 -2 12.68 1.65
3 -11 -2 13.32 1.63
-3 11 2 15.98 1.64
-3 11 2 15.95 1.37
-3 11 2 14.75 1.67
-3 11 2 15.53 2.16
-3 11 2 13.42 1.41
-3 11 2 15.96 1.86
3 -11 -1 46.65 2.03
3 -11 -1 49.54 2.55
3 -11 -1 49.14 2.09
3 -11 -1 48.2 2.61
-3 11 1 48.28 2.41
-3 11 1 47.55 2.83
-3 11 1 42.81 2.54
-3 11 1 46.44 2.52
-3 11 1 46.29 2.11
3 -11 0 12.66 1.58
3 -11 0 11.18 1.66
3 -11 0 11.53 1.71
3 -11 0 11.4 0.92
3 -11 0 9.72 1.33
3 -11 0 11.53 0.89
-3 11 0 10.72 1.65
-3 11 0 14.17 1.9
-3 11 0 11.07 1.55
-3 11 0 10.98 1.35
-3 11 0 10.8 1.56
3 -11 1 69.64 3.23
3 -11 1 70.21 2.83
3 -11 1 67.5 2.83
3 -11 1 66.84 3.4
3 -11 1 65.78 2.77
3 -11 1 64.98 3.12
-3 11 -1 68.81 3.01
-3 11 -1 69.87 3.19
-3 11 -1 69.3 3.42
-3 11 -1 72.97 2.71
-3 11 -1 73.09 3.32
3 -11 2 10.34 1.42
3 -11 2 10.1 1.84
3 -11 2 10.75 1.4
3 -11 2 7.87 1.56
3 -11 2 10.27 1.54
-3 11 -2 10.75 1.88
-3 11 -2 9.81 1.65
-3 11 -2 9.23 1.12
3 -11 3 9.18 1.85
3 -11 3 8.75 1.61
3 -11 3 11.83 2.02
3 -11 3 11.12 1.54
-3 11 -3 10.58 1.9
-3 11 -3 10.62 1.78
-3 11 -3 9.72 1.35
3 -11 4 1.3 1.61
3 -11 4 1.62 1.36
3 -11 4 3.62 1.45
3 -11 4 3.35 1.4
3 -11 4 2.37 1.33
-3 11 -4 2.11 1.67
-3 11 -4 2.45 1.7
-3 11 -4 1.71 1
3 -11 5 23.96 2.68
3 -11 5 23.53 3.18
3 -11 5 27.32 2.68
3 -11 5 25.18 2.93
3 -11 5 22.12 3.02
3 -11 5 26.36 2.66
-3 11 -5 23.66 2.02
-3 11 -5 24.58 3.17
-3 11 -5 25.78 3.16
3 -11 6 25.59 3.24
3 -11 6 29.81 3.1
3 -11 6 22.99 2.94
3 -11 6 29.49 3.03
3 -11 6 29.79 3.46
3 -11 6 24.38 3.54
-3 11 -6 30.91 3.49
-3 11 -6 30.16 2.45
-3 11 -6 34.7 3.8
-3 11 -6 26 3.12
3 -11 7 0.48 2.08
3 -11 7 6.24 2.51
3 -11 7 2.17 2.14
3 -11 7 5.3 2.16
-3 11 -7 3.1 1.6
-3 11 -7 7.72 2.31
3 -11 8 0.31 2.29
3 -11 8 -1.06 2.64
3 -11 8 -0.06 2.49
3 -11 8 1.26 2.55
-3 11 -8 -0.73 2.08
-3 11 -8 1.46 2.41
3 -11 9 -2.85 2.58
3 -11 9 -0.54 2.9
3 -11 9 3.41 2.78
-4 12 8 6.11 1.77
-4 12 8 6.71 2.15
-4 12 8 10.9 1.87
-4 12 7 2.56 1.11
-4 12 7 3.97 1.91
-4 12 7 1.98 1.02
-4 12 7 2.15 1.92
-4 12 7 4.09 1.54
-4 12 6 1.55 0.99
-4 12 6 3.01 1.79
-4 12 6 7.07 1.93
-4 12 6 1.53 1.13
-4 12 6 4.85 1.37
4 -12 -5 5.81 1.27
4 -12 -5 -1.36 1.35
-4 12 5 7.35 1.4
-4 12 5 6.91 1.16
-4 12 5 7.1 1.46
-4 12 5 7.66 1.85
-4 12 5 4.42 1.62
4 -12 -4 40.89 2.81
4 -12 -4 38.12 2.37
-4 12 4 35.5 2.79
-4 12 4 40.96 2.05
-4 12 4 33.89 2.88
-4 12 4 36.52 2.6
-4 12 4 33.88 2.31
4 -12 -3 7.37 1.63
4 -12 -3 7.93 1.46
-4 12 3 7.39 1.57
-4 12 3 9.32 1.76
-4 12 3 7.96 1.17
-4 12 3 7.41 1.38
-4 12 3 6.92 1.47
4 -12 -2 17.36 1.31
4 -12 -2 17.5 2.03
4 -12 -2 16.56 1.38
-4 12 2 18.67 2.02
-4 12 2 16.33 2.1
-4 12 2 18.14 1.66
-4 12 2 14.95 1.83
-4 12 2 19.9 1.95
4 -12 -1 4 1.23
4 -12 -1 6.56 1.1
4 -12 -1 7.11 1.18
-4 12 1 4.62 1.16
-4 12 1 2.89 1.69
-4 12 1 3.62 1.02
-4 12 1 6.5 1.6
-4 12 1 3.24 1.48
4 -12 0 41.55 2.25
4 -12 0 42.3 2.34
4 -12 0 43.27 2.76
-4 12 0 42.17 2.96
-4 12 0 42.49 2.52
-4 12 0 42.7 2.86
-4 12 0 43.82 3.21
-4 12 0 45.31 2.27
4 -12 1 42.74 2.87
4 -12 1 40.75 1.7
4 -12 1 43.58 2.58
4 -12 1 48.05 2.48
-4 12 -1 43.02 3.08
-4 12 -1 47.13 2.97
-4 12 -1 43.19 2.71
-4 12 -1 44.36 2.24
4 -12 2 3.43 1.23
4 -12 2 3.58 1.61
4 -12 2 2.55 1.2
4 -12 2 3.78 0.86
4 -12 2 1.58 1.42
4 -12 2 2.74 1.71
-4 12 -2 4.74 1.81
-4 12 -2 5.77 1.21
-4 12 -2 5.96 1.73
4 -12 3 23.1 3.13
4 -12 3 18.68 2.28
4 -12 3 20.72 2.39
4 -12 3 18.98 2.45
4 -12 3 23.67 2.88
-4 12 -3 12.42 2.03
-4 12 -3 20.8 2.51
-4 12 -3 19.08 2.37
-4 12 -3 20.16 1.89
4 -12 4 2.89 1.71
4 -12 4 5.21 1.66
4 -12 4 -0.76 1.88
4 -12 4 0.29 1.54
4 -12 4 2.77 1.59
4 -12 4 3.81 1.79
-4 12 -4 3.66 2.04
-4 12 -4 2.83 1.83
-4 12 -4 2.33 1.13
-4 12 -4 4.24 2.01
4 -12 5 11.82 2.47
4 -12 5 11.24 2.31
4 -12 5 13.3 2.24
4 -12 5 17 2.34
4 -12 5 17.67 2.79
4 -12 5 23.71 2.98
-4 12 -5 12.4 2.26
-4 12 -5 12.91 2.6
-4 12 -5 13.49 1.92
-4 12 -5 10.21 2.38
4 -12 6 -1.91 1.83
4 -12 6 -0.17 2.11
4 -12 6 -1.71 1.8
4 -12 6 2.87 2.48
-4 12 -6 -1.51 2.34
-4 12 -6 2.87 2.1
-4 12 -6 0.92 1.54
4 -12 7 17.7 3
4 -12 7 14.54 3.4
4 -12 7 18.2 3.02
4 -12 7 17.27 2.78
4 -12 7 19.99 2.53
-4 12 -7 11.9 2.77
-4 12 -7 22.72 2.52
4 -12 8 11.73 2.74
4 -12 8 -0.92 3.34
4 -12 8 9.5 2.96
4 -12 8 7.43 2.65
4 -12 8 5.15 2.87
-5 13 8 1.3 1.95
-5 13 8 3.97 2.51
-5 13 7 15.53 2.09
-5 13 7 16.76 1.59
-5 13 7 23.83 3.3
-5 13 7 16.28 2.09
-5 13 7 14.81 2.68
-5 13 6 8.67 2.4
-5 13 6 10.21 1.58
-5 13 6 9.93 1.41
-5 13 6 7.77 2.11
-5 13 6 11.66 1.87
5 -13 -5 25.74 3.01
5 -13 -5 22.24 2.87
-5 13 5 19.81 2.53
-5 13 5 29.5 3.05
-5 13 5 26.39 2.51
-5 13 5 25.33 3.44
-5 13 5 24.22 1.98
5 -13 -4 25.42 2.93
5 -13 -4 24.64 2.93
5 -13 -4 22.04 2.35
-5 13 4 29.36 2.8
-5 13 4 29.52 2.51
-5 13 4 22.56 2.6
-5 13 4 28.26 2.05
-5 13 4 25 2.87
5 -13 -3 14.73 2.16
5 -13 -3 14.93 1.86
5 -13 -3 15.73 2.12
-5 13 3 18.56 2.1
-5 13 3 15.22 2.27
-5 13 3 16.09 2.07
-5 13 3 16.1 1.86
-5 13 3 16.27 1.81
5 -13 -2 14.25 1.57
5 -13 -2 13.61 1.43
5 -13 -2 13.82 1.88
5 -13 -2 12.86 2.24
-5 13 2 14.31 1.84
-5 13 2 17.64 2.17
-5 13 2 17.4 1.86
-5 13 2 18.46 2.44
-5 13 2 16.32 2.1
5 -13 -1 9.91 1.83
5 -13 -1 10.56 2.02
5 -13 -1 7.13 1.21
5 -13 -1 4.8 1.28
5 -13 -1 4.59 1.78
-5 13 1 8.93 1.44
-5 13 1 9.4 2.08
-5 13 1 10.29 1.93
-5 13 1 7.5 1.71
-5 13 1 7.36 1.81
5 -13 0 25.93 2.35
5 -13 0 23.68 2.03
5 -13 0 25.13 2.84
5 -13 0 20.19 2.51
-5 13 0 29.45 3.1
-5 13 0 29.09 2.56
-5 13 0 28.16 2.16
-5 13 0 23.84 2.84
-5 13 0 29.18 2.99
5 -13 1 10.14 1.77
5 -13 1 12.35 1.23
5 -13 1 11.96 2.1
5 -13 1 10.19 2.24
5 -13 1 14.79 2.06
-5 13 -1 13.51 1.71
-5 13 -1 14.22 2.33
-5 13 -1 11.57 2.18
-5 13 -1 7.03 2.19
5 -13 2 7.11 1.71
5 -13 2 8.53 2.09
5 -13 2 6.25 1.14
5 -13 2 2.65 1.66
5 -13 2 4.87 1.66
5 -13 2 6.86 2.22
5 -13 2 5.85 1.56
-5 13 -2 5.44 2.06
-5 13 -2 8.82 2.35
-5 13 -2 5.54 2.14
-5 13 -2 5.28 1.39
5 -13 3 14.07 2.09
5 -13 3 9.34 2.49
5 -13 3 9.95 1.94
5 -13 3 12.02 2.32
5 -13 3 13.46 2.11
5 -13 3 9.45 2.24
5 -13 3 10.05 1.38
-5 13 -3 10.73 2.49
-5 13 -3 11.38 2.3
-5 13 -3 7.7 2.28
-5 13 -3 10.45 1.69
5 -13 4 6.63 2.84
5 -13 4 9.98 2.19
5 -13 4 1.72 1.98
5 -13 4 7.01 2.34
5 -13 4 7.17 1.42
5 -13 4 6.12 1.99
-5 13 -4 10.09 2.68
-5 13 -4 6.69 2.54
-5 13 -4 5.51 2.2
-5 13 -4 5.38 1.62
5 -13 5 20.37 3.09
5 -13 5 15.56 3.15
5 -13 5 20.58 2.61
5 -13 5 20.18 2.63
5 -13 5 21.81 2.69
-5 13 -5 24.13 2.97
-5 13 -5 20.15 2.83
-5 13 -5 19.26 3.13
5 -13 6 6.33 2.71
5 -13 6 4.84 2.3
5 -13 6 2.14 1.89
5 -13 6 -1.19 2.47
-5 13 -6 3.97 2.12
5 -13 7 3.68 2.67
5 -13 7 1.83 2.77
5 -13 7 0.4 2.09
5 -13 7 8.28 3
-5 13 -7 0.01 2.65
-6 14 7 8.42 1.58
-6 14 7 7.88 2.3
6 -14 -6 3.15 2
6 -14 -6 1.07 2.43
-6 14 6 3.74 1.5
-6 14 6 7.96 2.84
-6 14 6 4.59 1.94
6 -14 -5 5.99 2.33
-6 14 5 7.18 1.52
-6 14 5 9.51 2.47
-6 14 5 13.56 2.06
-6 14 5 6.92 1.86
-6 14 5 4.05 2.59
6 -14 -4 1.73 1.75
6 -14 -4 1.86 2.13
-6 14 4 0.16 1.52
-6 14 4 -0.73 1.72
-6 14 4 0.89 2.07
-6 14 4 0.23 2.33
-6 14 4 0.59 1.31
6 -14 -3 30.42 3.09
6 -14 -3 29.39 3.49
-6 14 3 28.48 3.11
-6 14 3 36.14 2.87
-6 14 3 35.28 3.45
-6 14 3 36.8 2.5
-6 14 3 33.49 4.09
6 -14 -2 45.9 3.67
6 -14 -2 44.02 3.48
6 -14 -2 44.17 2.18
6 -14 -2 46.2 2.26
-6 14 2 46.04 2.69
-6 14 2 45.28 3.56
-6 14 2 53.26 3.29
-6 14 2 48.54 3.56
-6 14 2 41.07 4.14
6 -14 -1 0.56 1.17
6 -14 -1 1.86 1.44
6 -14 -1 3.57 2.01
6 -14 -1 1.08 1.77
-6 14 1 0.05 1.93
-6 14 1 -0.42 1.53
-6 14 1 -0.39 1.83
-6 14 1 -0.18 1.31
-6 14 1 -2.15 2.22
6 -14 0 2.21 1.88
6 -14 0 1.45 1.72
6 -14 0 5.89 1.53
6 -14 0 -0.8 2
-6 14 0 4 2.13
-6 14 0 0.12 1.29
-6 14 0 3.15 1.99
-6 14 0 1.81 2.43
6 -14 1 11.27 1.39
6 -14 1 10.68 2.05
6 -14 1 10.81 2.4
6 -14 1 12.79 1.93
6 -14 1 11.27 2.1
6 -14 1 13.58 1.65
-6 14 -1 16.39 2.75
-6 14 -1 15.37 2
-6 14 -1 10.37 2.46
6 -14 2 57.75 4.2
6 -14 2 48.4 3.66
6 -14 2 54.92 3.54
6 -14 2 56.59 2.46
-6 14 -2 58.21 3.33
-6 14 -2 60.42 4.71
-6 14 -2 51.52 4.43
6 -14 3 13.6 2.53
6 -14 3 15.03 1.64
6 -14 3 15.67 2.33
6 -14 3 16.52 2.57
-6 14 -3 13.54 2.95
-6 14 -3 13.83 3.06
-6 14 -3 14.69 2.18
6 -14 4 3.94 2.25
6 -14 4 -1.72 2.29
6 -14 4 7.58 2.25
6 -14 4 7.3 1.68
-6 14 -4 3.7 1.89
-6 14 -4 8.07 3.11
6 -14 5 -1 2.47
6 -14 5 0.58 1.9
6 -14 5 0.02 2.36
6 -14 5 1.95 2.8
-6 14 -5 4.84 2.11
6 -14 6 7.72 2.4
6 -14 6 6 2.9
6 -14 6 8.56 3.26
6 -14 6 9.31 3.17
-6 14 -6 6.68 2.86
-7 15 5 18.85 2.2
-7 15 5 17.76 2.41
-7 15 4 15.56 2.3
-7 15 4 6.89 2.77
-7 15 4 8.2 1.79
7 -15 -3 9.32 2.39
-7 15 3 14.85 2.65
-7 15 3 12.8 2.02
-7 15 3 11.71 2.09
7 -15 -2 2.4 2.19
7 -15 -2 4.52 1.37
-7 15 2 3.41 2.05
-7 15 2 5.7 2.12
-7 15 2 4.21 1.65
-7 15 2 6.63 2.56
7 -15 -1 38.73 3.18
7 -15 -1 36.26 4.05
7 -15 -1 37.61 2.72
-7 15 1 38.95 3.03
-7 15 1 30.07 4.14
-7 15 1 38.05 4.01
7 -15 0 28.89 2.92
7 -15 0 30.92 3.89
-7 15 0 25.44 3.37
-7 15 0 31.6 3.34
-7 15 0 23.42 2.79
7 -15 1 7.17 2.32
7 -15 1 7.8 2.07
7 -15 1 10.94 2.43
-7 15 -1 13.89 2.12
-7 15 -1 5.76 2.64
-7 15 -1 9.64 2.94
7 -15 2 12.61 1.6
7 -15 2 10.37 2.27
7 -15 2 17.67 3.11
-7 15 -2 15.11 2.22
-7 15 -2 12.57 3.1
7 -15 3 11.64 2.69
7 -15 3 14.92 1.95
7 -15 3 11.76 2.82
-7 15 -3 14.01 2.19
-7 15 -3 16.57 3.57
7 -15 4 23.23 3.38
7 -15 4 32.31 4.16
7 -15 4 27.52 3.49
7 -15 4 31.66 3.65
-7 15 -4 19.3 3.99
-7 15 -4 30.71 4.01
-8 16 3 0.79 1.99
-8 16 2 5.64 1.95
-8 16 2 3.74 3.2
8 -16 -1 20.7 2.49
8 -16 -1 18.24 3.46
-8 16 1 16.2 2.2
-8 16 1 12.43 3.3
8 -16 0 5.75 2.25
8 -16 0 3.04 3.04
-8 16 0 5.74 2.06
8 -16 1 12.92 2.59
8 -16 1 17.38 3.45
8 -16 1 14.33 3
-8 16 -1 12.41 2.45
8 -16 2 11.27 2.84
8 -16 2 13.92 3.55
-8 16 -2 8.59 2.47
-23 13 -2 5.98 2.52
23 -13 2 4.83 2.29
23 -13 2 4.81 3.22
23 -13 2 4.86 2.68
-23 13 -1 6.18 2.19
23 -13 1 3.14 2.56
23 -13 1 3.01 2.87
-23 13 0 6.56 2.18
23 -13 0 2.5 2.75
23 -13 0 4.68 2.34
-23 13 1 17.41 2.44
23 -13 -1 11.13 2.88
23 -13 -1 18.45 2.45
23 -13 -1 9.48 2.68
-23 13 2 2.23 1.85
-23 13 2 2.88 1.97
-23 13 2 4.99 3.31
23 -13 -2 -0.22 1.84
23 -13 -2 3.56 2.66
23 -13 -2 2.01 2.41
23 -13 -2 -0.29 2.56
-23 13 3 5.51 1.97
-23 13 3 8.75 2.19
23 -13 -3 2.98 2.85
23 -13 -3 5.8 1.88
-23 13 4 3.11 1.91
-23 13 4 2.19 2.19
-22 12 -4 9.11 2.85
22 -12 4 15.38 3.3
22 -12 4 6.49 2.31
22 -12 4 5.55 3.05
22 -12 4 5.1 2.98
-22 12 -3 20.97 2.8
22 -12 3 20.59 2.79
22 -12 3 20.93 2.35
22 -12 3 17.95 3.35
22 -12 3 15.62 2.93
-22 12 -2 22.89 2.65
22 -12 2 21.68 3.27
22 -12 2 17.87 3.17
22 -12 2 18.87 2.1
22 -12 2 17.86 2.53
-22 12 -1 12.15 2.03
22 -12 1 9 1.61
22 -12 1 10.38 2.08
22 -12 1 9.27 2.33
-22 12 0 7.38 3.3
-22 12 0 3.95 1.76
22 -12 0 3.54 1.22
22 -12 0 0.18 2.11
22 -12 0 5.28 1.95
22 -12 0 5.06 2.63
22 -12 0 4.85 2.41
-22 12 1 3.29 1.64
-22 12 1 3.68 3.14
22 -12 -1 3.78 2.18
22 -12 -1 5.72 1.78
22 -12 -1 0.3 2.27
22 -12 -1 0.67 1.94
-22 12 2 6.68 3.07
-22 12 2 9.96 1.82
-22 12 2 9.71 1.77
22 -12 -2 10.83 1.8
22 -12 -2 9.26 2.38
22 -12 -2 9.11 2.34
-22 12 3 15.16 2.26
-22 12 3 14.8 2.85
-22 12 3 15.82 2.03
22 -12 -3 14.98 2.1
22 -12 -3 13.94 2.66
22 -12 -3 17.19 2.25
-22 12 4 4.19 1.87
-22 12 4 1.4 2.59
-22 12 4 -0.74 1.46
22 -12 -4 2.92 1.25
22 -12 -4 3.1 2.14
22 -12 -4 2.75 1.94
-22 12 5 18.33 2.49
-22 12 5 13.74 1.93
-22 12 6 3.75 1.7
-22 12 6 2.58 2.15
-21 11 -5 25.33 3.03
21 -11 5 24.54 3.26
21 -11 5 27.99 3.78
21 -11 5 23.79 2.72
-21 11 -4 11.71 2.28
21 -11 4 12.11 1.93
21 -11 4 12.46 2.61
21 -11 4 12.5 2.8
21 -11 4 14.16 2.88
-21 11 -3 1.71 1.74
21 -11 3 0.94 2.12
21 -11 3 2.67 1.49
21 -11 3 3.78 2.43
21 -11 3 4.06 2.3
-21 11 -2 1.21 1.52
21 -11 2 1.94 2.14
21 -11 2 3.49 1.27
21 -11 2 -1.05 2
21 -11 2 1.48 2.15
21 -11 2 -2.26 1.57
-21 11 -1 18.4 2.14
-21 11 -1 10.67 2.85
21 -11 1 23.21 3.31
21 -11 1 19.97 2.34
21 -11 1 24.19 1.86
21 -11 1 16.56 2.52
21 -11 1 22.75 2.7
21 -11 1 20.44 2.54
-21 11 0 26.61 3.77
-21 11 0 37.83 4.37
-21 11 0 35.55 2.64
21 -11 0 42.64 3.02
21 -11 0 34.25 3.32
21 -11 0 35.05 3.45
21 -11 0 34.89 3.1
21 -11 0 39.76 1.96
21 -11 0 35.64 3.28
-21 11 1 7.78 2.55
-21 11 1 9.53 2.46
-21 11 1 10.49 2.32
-21 11 1 12.8 1.89
21 -11 -1 9.8 1.77
21 -11 -1 11.84 2.18
21 -11 -1 13.1 2.03
21 -11 -1 9.07 1.98
21 -11 -1 13.65 1.37
-21 11 2 7.78 2.69
-21 11 2 2.26 1.21
-21 11 2 4.02 2.11
-21 11 2 2.92 2.42
21 -11 -2 3.31 1.77
21 -11 -2 2.42 1.65
21 -11 -2 6.3 1.64
21 -11 -2 4.13 1.67
21 -11 -2 5.71 1.48
-21 11 3 3.63 2.32
-21 11 3 4.35 1.54
-21 11 3 0.7 2.46
-21 11 3 1.87 1.26
-21 11 3 1.39 2.23
21 -11 -3 0.98 1.67
21 -11 -3 3.37 1.44
21 -11 -3 4.34 1.97
21 -11 -3 3.16 1.15
-21 11 4 17.41 3.09
-21 11 4 21.84 2.59
-21 11 4 18.9 2.86
-21 11 4 13.73 2.77
-21 11 4 22.58 2.3
21 -11 -4 21.44 2.62
21 -11 -4 16.73 2
21 -11 -4 19.8 2.48
21 -11 -4 23.23 1.76
-21 11 5 27.36 2.48
-21 11 5 26.8 2.97
-21 11 5 23.53 3.11
-21 11 5 26.83 2.86
21 -11 -5 25.38 2.4
21 -11 -5 19.65 2.51
-21 11 6 4.47 2.01
-21 11 6 8.18 1.6
-21 11 6 3.37 1.84
21 -11 -6 1.97 1.69
-21 11 7 2.62 1.57
-21 11 7 2.53 2.09
-21 11 8 1.19 1.7
20 -10 6 8.48 2.26
20 -10 6 3.59 2.73
20 -10 6 0.25 2.73
20 -10 6 2.86 2.52
-20 10 -5 -1.67 2.82
-20 10 -5 6.84 2.13
-20 10 -5 5.24 2.03
20 -10 5 5.84 2.01
20 -10 5 3.2 2.29
20 -10 5 1.5 2.11
20 -10 5 3.5 2.4
20 -10 5 4.49 2.34
-20 10 -4 7.96 1.73
-20 10 -4 5.97 2.78
-20 10 -4 6.37 2.02
20 -10 4 4.66 2.06
20 -10 4 4.61 2.33
20 -10 4 1.19 2
20 -10 4 4.92 1.56
-20 10 -3 21.51 2.45
-20 10 -3 17.09 2.78
20 -10 3 22.78 2.83
20 -10 3 20 2.47
20 -10 3 18.3 2.72
20 -10 3 19.7 2.29
20 -10 3 26.96 2.2
-20 10 -2 26.15 3.61
-20 10 -2 33.05 4
-20 10 -2 27.49 2.4
-20 10 -2 31.54 3.88
20 -10 2 31.47 3.27
20 -10 2 28.23 2.98
20 -10 2 24.57 2.95
20 -10 2 29.12 1.95
20 -10 2 26.11 2.78
20 -10 2 28.14 3.21
-20 10 -1 22.98 2.17
-20 10 -1 17.54 2.94
-20 10 -1 18.78 2.57
-20 10 -1 13.97 2.4
20 -10 1 19.31 2.63
20 -10 1 22.37 2.71
20 -10 1 23.65 2.53
20 -10 1 18.13 2.05
20 -10 1 21.61 1.71
20 -10 1 20.6 2.76
-20 10 0 15.4 2.59
-20 10 0 12.09 2.11
-20 10 0 14.22 1.67
20 -10 0 13.34 1.78
20 -10 0 9.82 1.73
20 -10 0 16.24 2.24
20 -10 0 12.79 1.42
-20 10 1 19.85 1.94
-20 10 1 18.09 2.54
-20 10 1 22 2.7
-20 10 1 17.51 2.4
20 -10 -1 22.99 2.51
20 -10 -1 19.63 1.32
20 -10 -1 21.13 2.58
20 -10 -1 21.8 2.53
20 -10 -1 24.64 2.22
-20 10 2 27.94 3.47
-20 10 2 32.32 2.23
-20 10 2 31.57 3.4
-20 10 2 34.95 3.27
20 -10 -2 27.35 2.06
20 -10 -2 33.03 1.39
20 -10 -2 32.65 2.61
20 -10 -2 31.93 2.62
20 -10 -2 32.86 2.53
20 -10 -2 35.38 2.44
-20 10 3 20.87 2.83
-20 10 3 18.27 2.44
-20 10 3 25.29 2.13
-20 10 3 21.24 2.68
-20 10 3 16.49 1.93
20 -10 -3 22.64 2.43
20 -10 -3 20.43 1.69
20 -10 -3 20.79 2.36
20 -10 -3 19.35 2.2
20 -10 -3 22.03 2.01
-20 10 4 19.91 2.6
-20 10 4 18.68 2.78
-20 10 4 21.7 2.27
-20 10 4 20.35 1.98
-20 10 4 17.08 2.33
20 -10 -4 17.73 1.93
20 -10 -4 22.11 2.41
20 -10 -4 22.31 1.55
20 -10 -4 22.72 1.76
20 -10 -4 21.54 2.07
-20 10 5 2.16 1.09
-20 10 5 2.34 1.91
-20 10 5 4.55 1.46
-20 10 5 3.71 2.11
-20 10 5 4.73 2.21
20 -10 -5 3.19 1.42
20 -10 -5 2.78 1.09
20 -10 -5 0.64 1.39
-20 10 6 14.88 2.45
-20 10 6 19.6 2.28
-20 10 6 15.95 1.92
-20 10 6 17.7 2.46
20 -10 -6 13.91 1.56
20 -10 -6 18.82 2.43
-20 10 7 5.98 2.34
-20 10 7 5.49 1.92
-20 10 7 1.22 1.79
-20 10 7 5.02 1.42
20 -10 -7 4.76 1.81
-20 10 8 5.96 1.48
-20 10 8 8.39 2.36
-20 10 8 8.67 2.78
-20 10 9 4.83 1.58
-20 10 9 7.36 2.75
19 -9 7 -1.23 2.21
19 -9 7 0.44 2.51
19 -9 7 2.63 2.42
19 -9 7 6.85 3
-19 9 -6 3.85 2.03
19 -9 6 3.25 2.16
19 -9 6 9.29 2.3
19 -9 6 2.82 2.1
19 -9 6 8.22 2.5
19 -9 6 8.31 2.08
-19 9 -5 3.17 1.54
-19 9 -5 3.84 1.64
-19 9 -5 3.24 2.27
19 -9 5 2.53 1.57
19 -9 5 3.63 1.96
19 -9 5 4.63 1.89
19 -9 5 2.72 1.85
19 -9 5 2.98 2.09
-19 9 -4 18.31 2.23
-19 9 -4 16.86 2.02
-19 9 -4 17.8 2.85
-19 9 -4 19.67 2.81
19 -9 4 17.44 2.25
19 -9 4 20.89 2.56
19 -9 4 20.82 2.78
19 -9 4 18.63 2.5
19 -9 4 17.74 1.89
19 -9 4 19.59 2.46
19 -9 4 17.1 2.35
-19 9 -3 50.17 4.01
-19 9 -3 42.68 3.57
-19 9 -3 48.15 2.61
19 -9 3 50.52 3.52
19 -9 3 47.08 3.12
19 -9 3 40.19 3.04
19 -9 3 49.28 2.49
19 -9 3 50.46 3.14
19 -9 3 50.55 3.48
-19 9 -2 2.06 1.04
-19 9 -2 2.07 1.46
-19 9 -2 -1.6 1.75
-19 9 -2 1.26 1.76
19 -9 2 1.79 1.34
19 -9 2 -1.29 1.36
19 -9 2 0.29 1.34
19 -9 2 2.32 0.94
19 -9 2 -0.52 1.29
19 -9 2 2.27 1.39
-19 9 -1 18.62 2.38
-19 9 -1 16.26 2.39
-19 9 -1 18.29 1.82
19 -9 1 18.02 2.35
19 -9 1 22.75 2.23
19 -9 1 16.29 1.51
19 -9 1 21.05 2.39
-19 9 0 13.81 2.1
-19 9 0 18.04 1.73
-19 9 0 15.33 2.22
19 -9 0 14.17 1.33
19 -9 0 17.15 2.14
19 -9 0 19.97 1.94
19 -9 0 18.12 2.19
19 -9 0 19.64 2.22
-19 9 1 87.52 4.18
-19 9 1 81.88 4.2
-19 9 1 78.45 2.99
19 -9 -1 78.84 3.58
19 -9 -1 89.44 3.26
19 -9 -1 82.22 3.23
19 -9 -1 80.39 2.36
19 -9 -1 80.04 3.27
19 -9 -1 81.08 3.28
-19 9 2 24.06 1.84
-19 9 2 23.9 2.72
-19 9 2 21.22 2.89
-19 9 2 23.49 2.62
19 -9 -2 23.35 1.79
19 -9 -2 24.22 2.1
19 -9 -2 23.5 1.93
19 -9 -2 23.73 1.16
19 -9 -2 20.69 2.02
19 -9 -2 21.37 2.17
-19 9 3 5.82 1.19
-19 9 3 5.1 1.64
-19 9 3 3.4 1.09
-19 9 3 7.38 1.96
-19 9 3 5.98 1.68
19 -9 -3 7.89 1.08
19 -9 -3 5.48 1.31
19 -9 -3 7.01 1.44
19 -9 -3 6.08 1.24
19 -9 -3 5.5 1.15
-19 9 4 8.26 1.92
-19 9 4 9.27 1.75
-19 9 4 11.71 2.06
-19 9 4 11.03 1.34
-19 9 4 11.02 1.52
19 -9 -4 9.01 1.33
19 -9 -4 10.09 1.13
19 -9 -4 11.22 1.55
19 -9 -4 10.37 1.21
-19 9 5 7.36 1.98
-19 9 5 10.11 1.93
-19 9 5 7.16 1.42
-19 9 5 9.14 1.31
19 -9 -5 5.78 1.31
19 -9 -5 6.57 1.3
-19 9 6 25.84 2.81
-19 9 6 30.24 2.53
-19 9 6 29.8 1.99
-19 9 6 26.47 3.02
19 -9 -6 24.59 2.23
19 -9 -6 27.49 2.15
-19 9 7 7.11 2.02
-19 9 7 9.15 1.39
-19 9 7 7.19 1.75
-19 9 7 5.33 1.75
19 -9 -7 4.56 1.62
19 -9 -7 4.25 1.32
-19 9 8 9.75 2.03
-19 9 8 6.65 2.27
-19 9 8 6.77 1.3
-19 9 8 6.62 1.67
-19 9 9 8.11 1.52
-19 9 9 10.79 2.55
-19 9 9 9.38 2.29
18 -8 8 8.12 2.89
18 -8 8 9.44 2.93
18 -8 8 9.53 2.88
18 -8 8 7.96 2.6
-18 8 -7 2.92 1.89
18 -8 7 2.43 1.9
18 -8 7 0.36 2.12
18 -8 7 1.71 2.11
18 -8 7 1.92 2.18
18 -8 7 0.19 1.79
-18 8 -6 13.37 1.93
-18 8 -6 14.81 1.59
18 -8 6 12.91 1.99
18 -8 6 14.15 2.18
18 -8 6 12.59 2.3
18 -8 6 11.78 2.34
18 -8 6 12.04 2.35
-18 8 -5 6.1 1.4
-18 8 -5 2.04 2.2
-18 8 -5 4.55 1.29
18 -8 5 3.21 1.78
18 -8 5 4.06 1.82
18 -8 5 2.29 1.91
18 -8 5 7.73 2.06
18 -8 5 0.26 1.28
18 -8 5 2.09 1.47
-18 8 -4 4.93 1.28
-18 8 -4 5.86 1.32
-18 8 -4 6.12 1.65
-18 8 -4 3.94 1.94
18 -8 4 5.31 1.73
18 -8 4 5.4 1.62
18 -8 4 5.3 1.68
18 -8 4 5.95 1.28
18 -8 4 1.2 1.56
18 -8 4 3.33 1.42
-18 8 -3 1.06 0.94
-18 8 -3 0.34 1.75
18 -8 3 1.49 1.2
18 -8 3 -0.03 1.3
18 -8 3 1.26 0.99
18 -8 3 -0.33 1.29
18 -8 3 -0.51 1.29
-18 8 -2 87.64 4.28
-18 8 -2 91.97 3.24
18 -8 2 90.45 2.98
18 -8 2 90.99 3.95
18 -8 2 97.81 3.61
18 -8 2 85.18 3.59
-18 8 -1 65.28 3.73
-18 8 -1 69.49 2.69
18 -8 1 66.21 2.98
18 -8 1 65.44 2.33
18 -8 1 66.55 3.03
18 -8 1 63.42 3.15
-18 8 0 6.73 1.59
-18 8 0 8.47 1.23
18 -8 0 6.31 1.12
18 -8 0 6.74 1.39
18 -8 0 7.03 1.4
18 -8 0 7.08 0.88
18 -8 0 6.49 1.34
-18 8 1 11.51 1.9
-18 8 1 13.51 1.94
-18 8 1 15.15 1.91
-18 8 1 10.35 1.35
18 -8 -1 10.84 1.44
18 -8 -1 12.83 1.65
18 -8 -1 16.56 1.51
18 -8 -1 13.47 1.76
18 -8 -1 12.27 1
18 -8 -1 10.71 1.33
-18 8 2 20.07 2.26
-18 8 2 19.96 2.47
-18 8 2 24.86 2.5
-18 8 2 20.68 1.53
18 -8 -2 23.28 1.12
18 -8 -2 23.42 1.9
18 -8 -2 21.86 1.77
18 -8 -2 24.45 1.63
18 -8 -2 24.31 1.79
18 -8 -2 23.6 1.99
-18 8 3 88.75 3.14
-18 8 3 86.85 2.39
-18 8 3 85.81 3.55
-18 8 3 87.66 3.91
-18 8 3 91.41 3.02
-18 8 3 92.38 3.87
18 -8 -3 89.53 2.81
18 -8 -3 85.18 3.08
18 -8 -3 86.81 2.85
18 -8 -3 84.78 3.38
18 -8 -3 86.47 2.84
-18 8 4 26.81 1.97
-18 8 4 24.27 2.4
-18 8 4 22.56 1.63
-18 8 4 17.85 2.23
18 -8 -4 21.63 1.48
18 -8 -4 24.14 1.86
18 -8 -4 25.11 1.43
18 -8 -4 23.59 1.27
-18 8 5 4.69 1.46
-18 8 5 4.53 1.51
-18 8 5 5.75 1.02
-18 8 5 5.66 1.25
18 -8 -5 4.9 1.18
18 -8 -5 4.03 0.8
-18 8 6 11.39 1.29
-18 8 6 8.17 1.42
-18 8 6 11.34 1.81
-18 8 6 6.93 1.63
18 -8 -6 8.97 1.27
18 -8 -6 12.28 1.63
-18 8 7 12.77 1.87
-18 8 7 12.97 1.88
-18 8 7 11.28 1.36
-18 8 7 13.41 1.89
18 -8 -7 11.19 1.31
18 -8 -7 10.34 1.49
-18 8 8 8.2 1.71
-18 8 8 10.47 1.7
-18 8 8 9.29 2.05
-18 8 8 8.95 1.32
18 -8 -8 8.38 1.17
18 -8 -8 8.56 1.34
-18 8 9 6 2.07
-18 8 9 3.75 2.09
-18 8 9 1.88 1.17
-18 8 9 0.27 1.01
-18 8 9 1.66 1.65
-18 8 10 5.47 1.28
-18 8 10 3.97 2.16
17 -7 8 4.53 2.19
17 -7 8 -2.97 2.46
17 -7 8 -1.58 2.37
17 -7 8 1.75 1.98
-17 7 -7 14 1.87
17 -7 7 9.46 1.88
17 -7 7 11.98 1.97
17 -7 7 10.31 2.24
17 -7 7 14.24 2.45
17 -7 7 10.87 2.21
-17 7 -6 12.62 1.23
-17 7 -6 11.23 2.56
-17 7 -6 15.81 2.05
17 -7 6 10.9 2.04
17 -7 6 10.64 1.7
17 -7 6 10.93 1.81
17 -7 6 7.84 2.06
17 -7 6 8.42 1.74
17 -7 6 13.99 2.3
-17 7 -5 16.87 1.66
-17 7 -5 16.56 1.8
-17 7 -5 23.99 2.6
-17 7 -5 19.37 2.67
17 -7 5 13.51 1.86
17 -7 5 18.94 2.33
17 -7 5 18.67 2.47
17 -7 5 18.95 2.41
17 -7 5 15.58 2
-17 7 -4 27.39 1.85
-17 7 -4 30.35 2.69
-17 7 -4 28.12 1.88
-17 7 -4 31.71 3.04
17 -7 4 30.61 2.34
17 -7 4 39.78 2.2
17 -7 4 29.72 2.67
17 -7 4 31.6 2.41
17 -7 4 30.35 2.53
-17 7 -3 9.96 1.71
-17 7 -3 12.59 1.48
-17 7 -3 9.02 1.74
17 -7 3 8.53 1.5
17 -7 3 12.06 1.41
17 -7 3 13.52 1.89
17 -7 3 10.4 1.46
17 -7 3 15.73 1.92
17 -7 3 14.07 2.02
-17 7 -2 41.49 2.95
-17 7 -2 41.21 2.04
-17 7 -2 40.6 2.63
17 -7 2 37.54 1.83
17 -7 2 35.91 2.39
17 -7 2 38.98 2.24
17 -7 2 37.36 2.26
17 -7 2 34.78 2.37
-17 7 -1 19.32 1.51
-17 7 -1 20.31 2.34
-17 7 -1 17.61 2.08
17 -7 1 20.1 1.33
17 -7 1 18.97 1.7
17 -7 1 21.65 1.92
17 -7 1 18.79 1.86
17 -7 1 17.31 1.79
-17 7 0 77.84 2.73
-17 7 0 76.51 3.55
-17 7 0 79.4 3.42
-17 7 0 84.42 3.37
17 -7 0 80.7 2.97
17 -7 0 83.69 3.34
17 -7 0 81.83 2.44
17 -7 0 82.79 3.06
17 -7 0 83.15 2.97
-17 7 1 59.32 3.02
-17 7 1 60.9 2.08
-17 7 1 59.19 2.3
-17 7 1 59.34 2.82
-17 7 1 62.01 3.01
17 -7 -1 61.88 2.47
17 -7 -1 61.33 2.47
17 -7 -1 62.12 2.78
17 -7 -1 60.47 2.42
17 -7 -1 60.49 1.92
-17 7 2 14.29 1.1
-17 7 2 13.81 1.95
-17 7 2 12.91 1.2
-17 7 2 13.31 1.82
-17 7 2 13.41 1.76
17 -7 -2 12.79 1.27
17 -7 -2 11.74 1.51
17 -7 -2 12.49 1.34
17 -7 -2 12.95 1.43
17 -7 -2 12.53 0.86
-17 7 3 41.31 2.62
-17 7 3 40.96 1.99
-17 7 3 39.47 2.53
-17 7 3 42.5 2.37
-17 7 3 41 1.53
-17 7 3 45.07 1.91
17 -7 -3 50.29 1.93
17 -7 -3 48.4 2.14
17 -7 -3 48.19 2.37
17 -7 -3 49.67 1.93
17 -7 -3 47.49 1.95
-17 7 4 4.26 0.92
-17 7 4 5.07 0.96
-17 7 4 5.35 1.35
-17 7 4 5.82 0.74
-17 7 4 5.93 1.3
17 -7 -4 5.35 0.71
17 -7 -4 4.3 0.96
17 -7 -4 6.19 0.79
17 -7 -4 5.74 0.81
-17 7 5 59.06 2.94
-17 7 5 57.77 2.78
-17 7 5 60.06 2.25
-17 7 5 63.57 2.68
-17 7 5 58.74 1.84
17 -7 -5 57.09 2.59
17 -7 -5 57.33 1.71
-17 7 6 23.45 2
-17 7 6 23.26 1.61
-17 7 6 24.26 2.25
-17 7 6 23.41 1.31
-17 7 6 24.2 2.14
-17 7 7 13.31 1.3
-17 7 7 14.09 1.72
-17 7 7 14.76 1.85
-17 7 7 14.2 1.71
-17 7 7 11.63 1.48
17 -7 -7 13.76 1.48
-17 7 8 11.58 1.69
-17 7 8 11.52 1.29
-17 7 8 11.01 1.25
-17 7 8 9.55 1.7
-17 7 8 10.22 1.81
17 -7 -8 10.3 1.51
-17 7 9 2.3 1.62
-17 7 9 2.37 1.2
-17 7 9 4.1 1.66
-17 7 9 2.73 1.02
-17 7 9 4.65 1.65
-17 7 10 15.95 2.24
-17 7 10 11.76 2.23
-17 7 10 13.6 1.37
16 -6 9 0.43 2.21
16 -6 9 -1.55 2.17
16 -6 9 2.89 2.34
16 -6 9 0.22 2.59
-16 6 -8 6.29 1.69
16 -6 8 10.48 2.41
16 -6 8 6.53 2.02
16 -6 8 12.5 2.41
16 -6 8 8.94 1.86
16 -6 8 10.66 2.14
-16 6 -7 34.82 2.53
-16 6 -7 29.19 3.84
16 -6 7 28.96 2.93
16 -6 7 33.26 3.27
16 -6 7 32.02 2.84
16 -6 7 31.97 2.64
16 -6 7 34.6 3.22
-16 6 -6 9.74 2.21
-16 6 -6 14.06 1.63
16 -6 6 11.16 1.92
16 -6 6 11.6 1.91
16 -6 6 10.28 1.75
16 -6 6 11.21 1.78
16 -6 6 9.78 1.56
-16 6 -5 1.76 0.92
-16 6 -5 0.19 1.57
-16 6 -5 -0.04 1.24
-16 6 -5 0.63 0.78
16 -6 5 2.59 1.22
16 -6 5 1.35 1.18
16 -6 5 2.11 1.18
16 -6 5 4.12 1.2
16 -6 5 1.66 1.35
-16 6 -4 2.13 0.82
-16 6 -4 2.9 1.23
-16 6 -4 1.69 0.77
-16 6 -4 2.48 1.49
16 -6 4 2.29 0.99
16 -6 4 2.57 1.17
16 -6 4 1.46 0.83
16 -6 4 1.67 1.03
16 -6 4 1.82 1
-16 6 -3 25.12 2.52
-16 6 -3 28.32 1.68
-16 6 -3 27.41 2.22
-16 6 -3 29.59 2.48
16 -6 3 27.39 1.66
16 -6 3 24.19 1.84
16 -6 3 27.1 2.08
16 -6 3 27.21 2
16 -6 3 33.41 2.18
-16 6 -2 74.46 3.07
-16 6 -2 70.48 3.3
-16 6 -2 69.71 2.52
16 -6 2 76.03 2.99
16 -6 2 76.67 2.58
16 -6 2 79.27 3.24
16 -6 2 75.69 2.83
-16 6 -1 0.3 0.52
-16 6 -1 2.39 1.02
-16 6 -1 1.04 1.09
-16 6 -1 1.7 0.9
16 -6 1 1.6 0.62
16 -6 1 0.7 0.75
16 -6 1 1.14 0.73
16 -6 1 1.04 0.67
-16 6 0 10.17 1.13
-16 6 0 11.62 1.57
-16 6 0 11.09 1.1
-16 6 0 11.75 1.54
-16 6 0 11.36 1.47
16 -6 0 11.98 1.29
16 -6 0 12.75 0.97
16 -6 0 12.97 1.34
16 -6 0 13.97 1.47
16 -6 0 11.78 1.35
-16 6 1 2.08 0.64
-16 6 1 2.14 1.07
-16 6 1 3.35 0.68
-16 6 1 3.1 1.01
-16 6 1 0.71 0.84
16 -6 -1 2.47 0.52
16 -6 -1 2.72 0.69
16 -6 -1 2.71 0.79
16 -6 -1 1.7 0.74
16 -6 -1 1.78 0.7
-16 6 2 68.66 2.37
-16 6 2 68.05 2.95
-16 6 2 68.58 2.33
-16 6 2 64.7 2.91
-16 6 2 70.45 2.77
-16 6 2 71.61 2.07
16 -6 -2 69.82 2.77
16 -6 -2 74.93 2.49
16 -6 -2 72.63 2.5
16 -6 -2 70.06 2.31
16 -6 -2 70.28 1.99
-16 6 3 45.65 1.56
-16 6 3 44.84 1.84
-16 6 3 45.16 2.44
-16 6 3 47.17 2.26
-16 6 3 44.8 1.97
16 -6 -3 45.55 1.96
16 -6 -3 45.67 1.74
16 -6 -3 45.2 2.18
16 -6 -3 47.06 1.7
-16 6 4 38.56 1.69
-16 6 4 34.08 2.02
-16 6 4 38.27 1.45
-16 6 4 37.13 1.88
-16 6 4 40.15 2.29
16 -6 -4 37.31 1.5
16 -6 -4 41.03 1.41
16 -6 -4 43.07 1.83
16 -6 -4 44.46 2.11
16 -6 -4 38.46 1.44
-16 6 5 70.89 2.79
-16 6 5 69.21 2.92
-16 6 5 67.11 2.06
-16 6 5 73.04 2.74
-16 6 5 67.85 2.34
16 -6 -5 66.81 2.62
16 -6 -5 68.33 2.38
-16 6 6 0.93 0.99
-16 6 6 0.18 0.68
-16 6 6 -0.03 0.87
-16 6 6 1.38 0.92
-16 6 6 0.98 0.68
16 -6 -6 0.47 0.8
16 -6 -6 -0.13 0.69
-16 6 7 14.74 1.33
-16 6 7 13.8 1.81
-16 6 7 13.49 1.75
-16 6 7 12.22 1.62
-16 6 7 11.59 1.3
-16 6 8 2.65 0.98
-16 6 8 1.35 0.8
-16 6 8 1 1.16
-16 6 8 3.14 1.15
-16 6 8 2.89 1.18
16 -6 -8 3.55 0.89
-16 6 9 36.64 2.44
-16 6 9 41 2.85
-16 6 9 31.69 2.25
-16 6 9 38.5 2.65
-16 6 9 37.92 1.92
-16 6 10 2.47 1.51
-16 6 10 3.37 1.66
-16 6 10 -0.15 0.96
-16 6 10 2.72 1.73
-16 6 11 3.63 2.45
-16 6 11 5.27 2.11
15 -5 9 19.63 2.59
15 -5 9 17.84 2.54
15 -5 9 16.55 2.44
15 -5 9 13.53 2.83
-15 5 -8 2.88 2.32
15 -5 8 12.86 2.26
15 -5 8 9.72 1.96
15 -5 8 9.75 1.92
15 -5 8 11.44 2.1
15 -5 8 7.96 1.7
-15 5 -7 14.09 1.68
-15 5 -7 12.85 2.35
-15 5 -7 10.38 1.78
15 -5 7 12.18 1.64
15 -5 7 10.31 1.7
15 -5 7 10.38 1.9
15 -5 7 13.96 1.92
15 -5 7 12.54 1.87
15 -5 6 28.24 2.34
15 -5 6 29.71 2.3
15 -5 6 35.2 2.61
15 -5 6 29.69 2.59
15 -5 6 25.69 2.1
-15 5 -5 107.47 3.68
-15 5 -5 112.52 4.42
-15 5 -5 114.18 3.49
15 -5 5 109.02 4.16
15 -5 5 111.41 3.75
15 -5 5 111.57 3.65
15 -5 5 118.6 4.23
15 -5 5 111.84 3.9
-15 5 -4 70.09 2.51
-15 5 -4 66.12 2.05
-15 5 -4 68.65 2.86
-15 5 -4 66.37 3.18
15 -5 4 66.37 2.59
15 -5 4 66.19 2.77
15 -5 4 65.29 2.96
15 -5 4 62.93 2.96
15 -5 4 64.14 2.57
-15 5 -3 16.16 1.87
-15 5 -3 17.02 2.04
-15 5 -3 18.82 1.77
-15 5 -3 19.21 1.33
15 -5 3 15.81 1.62
15 -5 3 16.81 1.63
15 -5 3 15 1.5
15 -5 3 16.62 1.57
15 -5 3 17.7 1.36
-15 5 -2 4.65 1.08
-15 5 -2 3.08 0.65
-15 5 -2 4.96 1.24
-15 5 -2 3.65 1.11
15 -5 2 2.49 0.83
15 -5 2 3.31 0.68
15 -5 2 3.63 0.83
15 -5 2 3.47 0.99
15 -5 2 3.21 0.92
-15 5 -1 133.08 4.17
-15 5 -1 133.14 4.02
-15 5 -1 131.79 3.55
-15 5 -1 135.82 3.57
-15 5 -1 122.52 4.23
15 -5 1 146.56 4.09
15 -5 1 131.87 4.28
15 -5 1 134.79 3.75
15 -5 1 138.25 3.55
-15 5 0 147.22 4.42
-15 5 0 147.61 3.81
-15 5 0 147 4.58
-15 5 0 144.54 3.68
-15 5 0 148.85 4.27
15 -5 0 159.04 4.3
15 -5 0 152.29 3.69
15 -5 0 150.89 4.55
15 -5 0 147.84 3.96
-15 5 1 5.14 0.69
-15 5 1 5.18 0.72
-15 5 1 5.63 0.93
-15 5 1 4.43 0.98
-15 5 1 5.72 1.08
15 -5 -1 5.44 0.84
15 -5 -1 5.25 0.78
15 -5 -1 5.97 0.69
15 -5 -1 5.26 0.84
15 -5 -1 7.04 0.92
-15 5 2 58.31 1.81
-15 5 2 57.09 2.04
-15 5 2 57.14 2.53
-15 5 2 59.38 2.03
-15 5 2 59.51 2.37
15 -5 -2 56.95 1.92
15 -5 -2 57.55 1.72
15 -5 -2 59.56 2.1
15 -5 -2 60.44 2.4
15 -5 -2 61.37 2.12
-15 5 3 3.78 0.73
-15 5 3 2.38 0.9
-15 5 3 2.31 0.6
-15 5 3 2.25 0.77
-15 5 3 3.92 0.61
15 -5 -3 3.09 0.56
15 -5 -3 2.9 0.7
15 -5 -3 4.41 0.61
15 -5 -3 3.17 0.71
-15 5 4 42.79 1.91
-15 5 4 45.45 2.06
-15 5 4 45.69 1.55
-15 5 4 45.41 2.21
-15 5 4 42.06 1.7
15 -5 -4 49.41 2.12
15 -5 -4 48.28 1.59
15 -5 -4 48.79 1.55
15 -5 -4 47.68 1.38
15 -5 -4 49.6 1.85
-15 5 5 6.13 0.82
-15 5 5 6.68 1.03
-15 5 5 4.03 0.82
-15 5 5 7.35 0.93
-15 5 5 6.91 1.18
15 -5 -5 4.49 0.77
15 -5 -5 3 0.79
-15 5 6 11.4 1.45
-15 5 6 12.81 1.16
-15 5 6 12.79 1.16
-15 5 6 12.17 1.58
-15 5 6 12.2 1.45
15 -5 -6 11.77 1.15
15 -5 -6 11.8 1.44
-15 5 7 28.1 1.88
-15 5 7 30.13 1.62
-15 5 7 30.7 1.57
-15 5 7 31.38 2.01
-15 5 7 29.34 1.9
15 -5 -7 26.75 1.4
-15 5 8 4.22 1.13
-15 5 8 6.93 1.18
-15 5 8 4.75 0.92
-15 5 8 6.85 1.18
-15 5 8 4.33 1.3
15 -5 -8 5.57 0.94
-15 5 9 7.93 1.31
-15 5 9 8.15 1.7
-15 5 9 9.66 1.5
-15 5 9 7.3 1.29
-15 5 9 8.25 1.06
-15 5 10 3.78 1.44
-15 5 10 0.4 0.92
-15 5 10 0.51 1.66
-15 5 10 1.04 1.61
-15 5 11 6.44 2.25
-15 5 11 7.33 2.18
-15 5 11 8.44 1.68
14 -4 10 4.43 2.12
14 -4 10 4.84 2.36
14 -4 10 6.76 2.65
14 -4 10 1.04 2.22
14 -4 9 10.39 1.97
14 -4 9 14.77 2.73
14 -4 9 8.58 2.02
14 -4 9 12.93 2.21
14 -4 9 10.87 1.97
-14 4 -8 14.89 1.95
-14 4 -8 13.75 1.93
-14 4 -8 19.25 2.51
14 -4 8 18.99 2.42
14 -4 8 16.56 2.04
14 -4 8 19.31 2.45
14 -4 8 21.12 2.68
14 -4 8 20.08 2.46
-14 4 -7 11.29 2.19
14 -4 7 16.74 2.1
14 -4 7 15.01 1.67
14 -4 7 19.57 2.23
14 -4 7 15.36 2.2
14 -4 7 19.09 2.38
-14 4 -6 49.81 2.27
14 -4 6 51.14 2.65
14 -4 6 52.26 2.4
14 -4 6 51.39 2.58
14 -4 6 51.66 2.82
14 -4 6 54.16 2.92
-14 4 -5 25.53 2.22
-14 4 -5 25.84 1.56
-14 4 -5 23.5 2.25
-14 4 -5 26.87 1.78
14 -4 5 23.95 1.67
14 -4 5 26.14 1.79
14 -4 5 23.97 1.98
14 -4 5 23.69 1.82
14 -4 5 24.98 1.99
-14 4 -4 45.85 2.52
-14 4 -4 46.74 1.93
-14 4 -4 46.1 2.17
-14 4 -4 45.05 2.56
14 -4 4 44.46 2.03
14 -4 4 46.02 2.34
14 -4 4 44.93 2.32
14 -4 4 47.33 2.09
14 -4 4 46.26 2.24
-14 4 -3 82.91 3.27
-14 4 -3 86.25 2.95
-14 4 -3 85.38 2.65
-14 4 -3 83.6 3.19
14 -4 3 88.4 3.05
14 -4 3 88.67 3.22
14 -4 3 89.73 2.8
14 -4 3 86.07 2.79
14 -4 3 86.43 3.15
-14 4 -2 77.81 2.91
-14 4 -2 72.15 2.96
-14 4 -2 75.65 2.41
-14 4 -2 80.92 2.8
14 -4 2 71.35 2.42
14 -4 2 71.74 2.78
14 -4 2 73.36 2.7
14 -4 2 76.4 2.67
14 -4 2 71.51 2.35
-14 4 -1 174.61 4.31
-14 4 -1 176.84 4.72
-14 4 -1 176.6 4.29
-14 4 -1 177.09 4.9
-14 4 -1 175.79 5.07
14 -4 1 175.86 4.99
14 -4 1 179.53 4.69
14 -4 1 172.98 4.33
14 -4 1 175.71 4.21
-14 4 0 59.36 2.29
-14 4 0 62.34 2.42
-14 4 0 59.6 1.99
-14 4 0 61.34 1.97
-14 4 0 59.01 2.49
14 -4 0 63.4 2.5
14 -4 0 64.5 2.18
14 -4 0 69.52 2.38
14 -4 0 68.64 2.01
-14 4 1 122.44 3.25
-14 4 1 128.08 3.23
-14 4 1 128.22 3.8
-14 4 1 120.31 3.83
-14 4 1 127.57 3.12
-14 4 1 128.02 3.65
14 -4 -1 126.6 3.09
14 -4 -1 129.44 3.36
14 -4 -1 126.73 3.84
14 -4 -1 131.99 3.57
-14 4 2 53.81 2.12
-14 4 2 52.6 1.66
-14 4 2 52 2.25
-14 4 2 51.76 1.85
-14 4 2 53.22 1.82
14 -4 -2 59.38 1.96
14 -4 -2 53.34 1.9
14 -4 -2 54.79 1.63
14 -4 -2 54.61 1.7
14 -4 -2 53.04 2.15
-14 4 3 150.12 4.13
-14 4 3 156.64 4.01
-14 4 3 157.03 4.45
-14 4 3 155.19 3.8
-14 4 3 156.53 3.58
14 -4 -3 156.98 3.51
14 -4 -3 156.13 3.79
14 -4 -3 155.44 3.82
14 -4 -3 151.82 4.34
-14 4 4 96.89 3.18
-14 4 4 96.11 2.93
-14 4 4 94.13 2.66
-14 4 4 95 2.92
-14 4 4 96.68 2.51
14 -4 -4 97.88 2.43
14 -4 -4 91.47 3
14 -4 -4 96.68 2.64
-14 4 5 13.31 1.26
-14 4 5 13.82 1.33
-14 4 5 12.42 1.03
-14 4 5 13.21 1.02
-14 4 5 11.95 1.22
14 -4 -5 15.44 1.25
14 -4 -5 14.34 1.06
-14 4 6 82.87 2.48
-14 4 6 84.03 2.5
-14 4 6 84.18 2.92
-14 4 6 78.96 2.66
-14 4 6 84.92 2.93
14 -4 -6 83.98 2.8
14 -4 -6 87.02 2.42
-14 4 7 12.24 1.42
-14 4 7 12.28 1.3
-14 4 7 13.01 1.13
-14 4 7 13.47 1.37
-14 4 7 12.74 1.48
14 -4 -7 11.83 1.05
-14 4 8 7.39 1.13
-14 4 8 6.5 1.18
-14 4 8 4.97 1.05
-14 4 8 6.84 0.97
14 -4 -8 8.5 1.11
-14 4 9 6.7 1.39
-14 4 9 6.6 1.27
-14 4 9 10.84 1.35
-14 4 9 6.98 1
-14 4 10 7.02 1.45
-14 4 10 7.46 1.88
-14 4 10 8.75 1.83
-14 4 10 5.91 1.01
-14 4 11 9.66 2.01
-14 4 11 5.12 2.14
-14 4 11 5.87 1.71
-14 4 12 0.97 2.67
-14 4 12 -1.17 2.09
13 -3 10 3.18 2.39
13 -3 10 0.28 2.4
13 -3 10 4.69 1.95
13 -3 10 2.66 1.92
-13 3 -9 -3.64 2
-13 3 -9 1.46 1.28
13 -3 9 1.14 1.52
13 -3 9 -0.08 1.79
13 -3 9 -0.12 1.43
13 -3 9 2.95 1.94
13 -3 9 0 1.54
-13 3 -8 14.66 2.27
-13 3 -8 15.57 1.73
-13 3 -8 18.67 1.81
13 -3 8 19.29 2.32
13 -3 8 17.97 2.33
13 -3 8 18.63 2.35
13 -3 8 14.42 1.8
13 -3 8 16.42 1.98
-13 3 -7 2.45 0.9
-13 3 -7 1.37 1.12
13 -3 7 1.92 1.03
13 -3 7 1.43 0.91
13 -3 7 1.44 1.33
13 -3 7 2.45 1.04
13 -3 7 1.9 1.23
-13 3 -6 9.08 1.57
13 -3 6 10.8 1.37
13 -3 6 12.73 1.82
13 -3 6 11.4 1.63
13 -3 6 10.55 1.25
13 -3 6 12.45 1.6
-13 3 -5 7.65 1.03
-13 3 -5 7.15 1.02
-13 3 -5 4.71 1.16
-13 3 -5 7.79 1.36
13 -3 5 4.64 0.99
13 -3 5 5.48 0.99
13 -3 5 5.63 1.08
13 -3 5 5.47 1.03
13 -3 5 4.56 0.96
-13 3 -4 156.85 4.18
-13 3 -4 160.32 4.72
-13 3 -4 153.64 3.95
13 -3 4 163.05 4.48
13 -3 4 163.58 4.73
13 -3 4 159.83 4.33
13 -3 4 158.27 4.1
13 -3 4 163.79 4.79
-13 3 -3 120.44 3.82
-13 3 -3 114.62 3.69
-13 3 -3 121.47 3.18
-13 3 -3 112.26 3.38
13 -3 3 110.48 3.52
13 -3 3 111.01 3.21
13 -3 3 119.1 3.65
13 -3 3 110.2 3.37
13 -3 3 111.18 3.12
-13 3 -2 20.03 1.53
-13 3 -2 21.22 1.41
-13 3 -2 19.1 1.31
-13 3 -2 19.61 1.13
-13 3 -2 20.37 1.46
13 -3 2 21.88 1.37
13 -3 2 21.94 1.43
13 -3 2 22.49 1.26
13 -3 2 23.57 1.42
13 -3 2 23.27 1.25
-13 3 -1 7.08 0.85
-13 3 -1 6.66 0.96
-13 3 -1 6.23 0.58
-13 3 -1 7.53 1.01
-13 3 -1 6.42 1.05
-13 3 -1 5.92 0.75
13 -3 1 5.43 0.88
13 -3 1 6.1 0.74
13 -3 1 5.78 0.81
13 -3 1 7.43 0.97
-13 3 0 79.97 2.25
-13 3 0 79.36 2.1
-13 3 0 74.17 2.69
-13 3 0 77.66 2.62
-13 3 0 75.56 2.23
13 -3 0 83.73 2.78
13 -3 0 83.76 2.42
13 -3 0 82.87 2.29
13 -3 0 83.4 2.59
-13 3 1 369.42 7.63
-13 3 1 362.91 7.79
-13 3 1 377.64 7.76
-13 3 1 374.06 8.87
13 -3 -1 372.55 8.85
13 -3 -1 377.61 8.32
13 -3 -1 366.71 7.62
13 -3 -1 375.32 7.8
-13 3 2 281.79 6.27
-13 3 2 285.05 6.61
-13 3 2 280.77 7.01
-13 3 2 287.61 5.98
-13 3 2 286.38 6.13
13 -3 -2 288.47 6.24
13 -3 -2 287.4 6.55
13 -3 -2 293.02 7.11
13 -3 -2 294.44 6.06
-13 3 3 31.88 1.31
-13 3 3 32.03 1.25
-13 3 3 34.13 1.67
-13 3 3 31 1.48
13 -3 -3 33.34 1.36
13 -3 -3 30.79 1.55
13 -3 -3 32.29 0.96
13 -3 -3 32.77 1.24
-13 3 4 14.08 1.07
-13 3 4 11.93 1.19
-13 3 4 12.4 0.91
-13 3 4 12.34 0.92
-13 3 4 12.17 1.03
13 -3 -4 12.04 0.91
13 -3 -4 10.89 1.03
13 -3 -4 12.31 0.7
-13 3 5 44.86 1.89
-13 3 5 42.6 1.73
-13 3 5 45.75 1.63
-13 3 5 44.05 1.64
-13 3 5 43.58 1.94
13 -3 -5 42.99 1.81
13 -3 -5 44.31 1.57
-13 3 6 78.03 2.34
-13 3 6 75.5 2.71
-13 3 6 81.49 2.5
-13 3 6 79.6 2.8
13 -3 -6 74.83 2.51
13 -3 -6 75.79 2.15
-13 3 7 25.67 1.63
-13 3 7 26.56 1.52
-13 3 7 26.2 1.36
-13 3 7 28.23 1.78
13 -3 -7 26.09 1.21
-13 3 8 12.69 1.41
-13 3 8 12.83 1.63
-13 3 8 10.91 1.42
-13 3 8 11.1 1.15
13 -3 -8 10.79 1.14
13 -3 -8 12.32 0.96
-13 3 9 1.97 0.99
-13 3 9 -0.1 0.73
-13 3 9 1.61 1.4
-13 3 9 1.09 1.05
-13 3 9 0.7 1.1
-13 3 10 17.75 1.98
-13 3 10 16.76 1.49
-13 3 10 16.95 1.71
-13 3 10 19.21 2.28
-13 3 10 18.79 2.4
-13 3 11 13.8 2.45
-13 3 11 8.62 1.64
-13 3 11 9.7 2.09
-13 3 12 0.18 1.95
-13 3 12 5.03 2.64
12 -2 10 2.25 1.97
12 -2 10 4.34 1.79
12 -2 10 5.36 2.31
12 -2 10 7.91 1.93
-12 2 -9 14.31 1.45
-12 2 -9 10.4 1.52
-12 2 -9 11.27 2.38
12 -2 9 15.71 2.11
12 -2 9 17.56 1.97
12 -2 9 15.86 1.98
12 -2 9 14.23 2.26
12 -2 9 14.29 2.04
-12 2 -8 2.05 0.97
-12 2 -8 2.24 1.17
-12 2 -8 -0.13 1.74
12 -2 8 4.46 1.49
12 -2 8 3.92 1.32
12 -2 8 5.51 1.05
12 -2 8 3.51 1.21
12 -2 8 3.3 1.27
-12 2 -7 21.84 2.38
-12 2 -7 20.98 1.49
12 -2 7 18.94 1.58
12 -2 7 19.78 1.72
12 -2 7 17.31 1.75
12 -2 7 20.93 2.02
12 -2 7 20.48 2.04
-12 2 -6 8.84 1.12
-12 2 -6 11.19 1.56
12 -2 6 7.82 1.18
12 -2 6 9.57 1.52
12 -2 6 11.11 1.33
12 -2 6 9.62 1.36
12 -2 6 10.55 1.22
-12 2 -5 10.75 1.4
-12 2 -5 9.44 1.31
12 -2 5 9.09 1.14
12 -2 5 8.56 0.98
12 -2 5 10.56 1.25
12 -2 5 11.2 1.38
12 -2 5 11.29 1.28
-12 2 -4 30.69 1.82
-12 2 -4 31.53 1.42
-12 2 -4 31.21 1.45
-12 2 -4 32.34 1.86
12 -2 4 34.65 1.77
12 -2 4 31.09 1.61
12 -2 4 31.41 1.58
12 -2 4 31.85 1.48
12 -2 4 30.45 1.74
-12 2 -3 11.55 1.23
-12 2 -3 10.58 1.2
-12 2 -3 11.35 0.92
-12 2 -3 11.89 1.05
12 -2 3 11.49 1.03
12 -2 3 9.67 0.92
12 -2 3 10.68 1.09
12 -2 3 10.08 0.99
12 -2 3 11.17 1.09
-12 2 -2 285.32 7.11
-12 2 -2 287.21 6.42
-12 2 -2 292.52 6.2
-12 2 -2 286.79 6.63
-12 2 -2 297.03 5.8
-12 2 -2 280.2 6.89
12 -2 2 276.74 6.12
12 -2 2 272.69 6.45
12 -2 2 273.83 6.83
12 -2 2 280.9 6.02
12 -2 2 277.25 6.65
-12 2 -1 110.93 3.24
-12 2 -1 118.46 3.44
-12 2 -1 111.79 3.15
-12 2 -1 117.14 3.01
-12 2 -1 115.58 2.91
-12 2 -1 112.2 2.6
12 -2 1 124.65 3.42
12 -2 1 130.61 3.69
12 -2 1 128.5 3.2
12 -2 1 128.6 3.19
-12 2 0 57.69 2.03
-12 2 0 56.81 1.77
-12 2 0 57.18 1.78
-12 2 0 55.09 2.13
-12 2 0 55.22 1.59
12 -2 0 57.56 1.84
12 -2 0 61.59 1.81
12 -2 0 61.01 2.01
-12 2 1 65.63 1.84
-12 2 1 60.48 2.22
-12 2 1 61.39 2.07
-12 2 1 63.07 1.88
-12 2 1 61.81 1.81
12 -2 -1 71.41 2.05
12 -2 -1 70.61 1.93
12 -2 -1 70.46 2.36
12 -2 -1 69.74 2.15
-12 2 2 200.94 5.1
-12 2 2 195.61 4.76
-12 2 2 198.06 4.44
-12 2 2 198.07 4.56
-12 2 2 200.05 4.35
12 -2 -2 194.75 4.24
12 -2 -2 188.28 4.52
12 -2 -2 193.99 4.97
12 -2 -2 198.09 4.36
-12 2 3 344.01 7.45
-12 2 3 343.91 8.1
-12 2 3 344.63 7.15
-12 2 3 339.66 7.06
-12 2 3 344.3 7.6
12 -2 -3 345.31 7.18
12 -2 -3 342.26 7.45
12 -2 -3 354.52 8.16
-12 2 4 134.43 3.24
-12 2 4 129.82 3.71
-12 2 4 135.67 3.43
-12 2 4 135.59 3.27
-12 2 4 131.42 3.54
12 -2 -4 136.77 3.57
12 -2 -4 139.62 3.13
12 -2 -4 138.28 3.24
12 -2 -4 122.23 3.64
-12 2 5 30.47 1.29
-12 2 5 30.28 1.53
-12 2 5 30.27 1.54
-12 2 5 30.03 1.36
12 -2 -5 31.7 1.5
12 -2 -5 30.33 1.26
12 -2 -5 28.47 1.54
-12 2 6 16.11 1.27
-12 2 6 16.02 1.05
-12 2 6 17.06 1.13
-12 2 6 15.24 1.3
12 -2 -6 13.23 1.12
12 -2 -6 15.44 0.99
-12 2 7 49.69 1.82
-12 2 7 51.98 2.24
-12 2 7 51.35 2.11
-12 2 7 51.58 1.92
12 -2 -7 51.87 1.71
-12 2 8 55.24 1.99
-12 2 8 54.83 2.22
-12 2 8 60.29 2.9
-12 2 8 51.71 2.47
-12 2 8 55.03 2.1
12 -2 -8 53.22 1.97
12 -2 -8 55.84 1.7
-12 2 9 16.56 1.41
-12 2 9 15.96 2.23
-12 2 9 17.43 1.54
-12 2 9 15.67 1.88
-12 2 9 14.12 1.5
-12 2 10 4.83 1.03
-12 2 10 4.5 1.62
-12 2 10 7.21 1.35
-12 2 10 5.88 1.16
-12 2 10 6.25 1.69
-12 2 11 -0.04 1.63
-12 2 11 -0.53 1.3
-12 2 11 -0.27 2.02
-12 2 12 -1.03 2.16
-12 2 12 -0.72 2.02
11 -1 11 8.39 2.68
11 -1 11 5.95 2.64
11 -1 11 1.59 1.7
11 -1 10 7.63 2.09
11 -1 10 5.87 1.58
11 -1 10 5.86 1.59
11 -1 10 5 1.67
11 -1 10 7.88 2.41
-11 1 -9 32.02 3.42
11 -1 9 32.73 2.19
11 -1 9 34.56 2.43
11 -1 9 38.74 3.2
11 -1 9 43.84 3.01
11 -1 9 33.54 2.45
-11 1 -8 3.53 0.86
-11 1 -8 0.46 0.91
11 -1 8 4.97 0.97
11 -1 8 3.72 1.02
11 -1 8 6.28 1.24
11 -1 8 2.31 1.31
11 -1 8 3.17 1.34
-11 1 -7 30.75 1.77
-11 1 -7 30.23 1.5
-11 1 -7 30.29 2.44
11 -1 7 28.9 1.59
11 -1 7 28.24 2.06
11 -1 7 28.12 1.81
11 -1 7 28.81 2.15
11 -1 7 30.8 1.84
-11 1 -6 1.32 1.04
-11 1 -6 0.89 0.57
11 -1 6 1.36 0.76
11 -1 6 1.44 0.69
11 -1 6 1.3 0.92
11 -1 6 0.67 0.78
-11 1 -5 14.76 1.03
-11 1 -5 14.44 1.44
-11 1 -5 14.8 1.53
11 -1 5 16.65 1.38
11 -1 5 15.09 1.21
11 -1 5 17.94 1.49
11 -1 5 14.89 1.27
11 -1 5 13.26 1.04
-11 1 -4 93.57 2.44
-11 1 -4 91.75 3.04
-11 1 -4 96.45 3.04
11 -1 4 96.57 3
11 -1 4 92 2.55
11 -1 4 93.74 2.78
11 -1 4 91.55 2.98
-11 1 -3 10.51 1.09
-11 1 -3 10.04 0.87
-11 1 -3 8.48 1.08
-11 1 -3 8.74 0.8
-11 1 -3 9.63 1.07
11 -1 3 7.77 0.91
11 -1 3 9.36 0.93
11 -1 3 9.82 0.97
11 -1 3 8.97 0.81
11 -1 3 9.43 0.87
-11 1 -2 84.1 2.61
-11 1 -2 89.35 2.55
-11 1 -2 86.24 2.47
-11 1 -2 87.23 2.73
11 -1 2 91.6 2.55
11 -1 2 91.11 2.69
11 -1 2 93.32 2.81
11 -1 2 90.06 2.41
11 -1 2 89.7 2.61
-11 1 -1 1.23 0.48
-11 1 -1 0.63 0.45
-11 1 -1 1.14 0.41
-11 1 -1 1.56 0.52
-11 1 -1 1.2 0.49
11 -1 1 1.44 0.42
11 -1 1 1.11 0.43
11 -1 1 1.05 0.47
11 -1 1 1.04 0.42
-11 1 0 144.28 3.37
-11 1 0 144.3 3.63
-11 1 0 144.55 3.22
-11 1 0 147.49 3.89
-11 1 0 140.96 3.67
-11 1 0 145.42 3.39
11 -1 0 146.57 3.65
11 -1 0 144.27 3.38
11 -1 0 150.61 3.91
11 -1 0 141.46 3.37
-11 1 1 49.05 1.81
-11 1 1 46.96 1.65
-11 1 1 46.79 1.48
-11 1 1 46.03 1.46
-11 1 1 50.03 1.55
11 -1 -1 51.77 1.58
11 -1 -1 51.9 1.84
11 -1 -1 48.19 1.49
11 -1 -1 47.35 1.62
11 -1 -1 48.49 1.5
-11 1 2 170.48 3.95
-11 1 2 164.65 4.07
-11 1 2 176.04 4.4
-11 1 2 168.46 3.78
-11 1 2 169.88 3.85
11 -1 -2 184.75 4.23
11 -1 -2 189.08 4.69
11 -1 -2 179.92 4.27
11 -1 -2 189.53 4.12
11 -1 -2 181.3 4.04
-11 1 3 278.03 6.26
-11 1 3 286.32 6.74
-11 1 3 279.6 5.95
-11 1 3 284.5 5.93
-11 1 3 279.75 6.2
11 -1 -3 273.35 6.13
11 -1 -3 283.04 6.66
11 -1 -3 276.83 6.06
11 -1 -3 281.25 5.87
-11 1 4 16.09 1.13
-11 1 4 14.97 0.91
-11 1 4 15.13 1.03
-11 1 4 14.58 0.94
11 -1 -4 14.23 0.72
11 -1 -4 15.8 0.93
11 -1 -4 17.14 1.07
11 -1 -4 14.3 1.06
-11 1 5 33.12 1.33
-11 1 5 33.05 1.36
-11 1 5 34.56 1.58
-11 1 5 35.52 1.6
11 -1 -5 28.73 1.38
11 -1 -5 28.48 1.47
11 -1 -5 28.87 1.23
-11 1 6 43.14 1.83
-11 1 6 44 1.6
-11 1 6 42.02 1.88
-11 1 6 41.42 1.6
11 -1 -6 43.76 1.54
11 -1 -6 40.83 1.89
11 -1 -6 44.29 1.78
-11 1 7 76.45 2.74
-11 1 7 71.24 2.98
-11 1 7 76.81 2.31
-11 1 7 73.81 2.32
-11 1 7 70.98 2.55
11 -1 -7 75.79 2.75
11 -1 -7 79.67 2.21
-11 1 8 15.9 1.23
-11 1 8 15.08 1.55
-11 1 8 16.73 1.89
-11 1 8 17.54 1.32
-11 1 8 13.98 1.38
11 -1 -8 13.02 1.17
11 -1 -8 16.21 1.66
11 -1 -8 14.27 1.06
-11 1 9 15.95 2.16
-11 1 9 14.82 1.54
-11 1 9 17.89 1.81
-11 1 9 13.95 1.47
-11 1 9 14.16 1.34
-11 1 10 4.24 1.42
-11 1 10 4.37 1.4
-11 1 10 6.78 1.78
-11 1 10 5.65 1.08
-11 1 10 5.97 1.16
-11 1 11 15.94 2.15
-11 1 11 14.41 2.5
-11 1 11 15.82 2.02
-11 1 11 16.14 1.61
-11 1 12 21.22 2.86
-11 1 12 15.7 2.23
10 0 11 23.66 3.1
10 0 11 27 3.02
10 0 11 22.44 3.03
10 0 10 0.38 1.11
10 0 10 0.38 1.4
10 0 10 5.45 1.97
10 0 10 3.89 1.21
10 0 10 -0.16 1.73
10 0 9 11.24 1.44
10 0 9 9.4 1.36
10 0 9 14.87 2.04
10 0 9 10.86 1.53
10 0 9 10.68 1.79
-10 0 -8 44.83 2.87
10 0 8 45.79 2.14
10 0 8 47.62 2.7
10 0 8 47.95 2.23
10 0 8 44.73 1.86
10 0 8 44.88 2.66
-10 0 -7 30.78 1.35
-10 0 -7 31.34 2.29
-10 0 -7 30.91 1.5
10 0 7 29.57 1.51
10 0 7 32.11 1.73
10 0 7 31.74 2.08
10 0 7 30.54 2.06
10 0 7 31.58 1.69
-10 0 -6 25.07 1.88
-10 0 -6 27.9 1.23
10 0 6 28.22 1.77
10 0 6 28.94 1.35
10 0 6 26.6 1.48
10 0 6 29.44 1.59
10 0 6 23.53 1.73
-10 0 -5 5.14 0.64
-10 0 -5 4.74 0.84
-10 0 -5 4.96 0.97
10 0 5 4.16 0.7
10 0 5 4.65 0.78
10 0 5 5.11 0.89
10 0 5 3.19 0.67
10 0 5 3.81 0.85
-10 0 -4 24.49 1.36
-10 0 -4 22.62 1.05
-10 0 -4 23.94 1.42
10 0 4 23 1.07
10 0 4 25.93 1.39
10 0 4 23.57 1.34
10 0 4 22.68 1.18
10 0 4 23.51 1.29
-10 0 -3 160.26 4.18
-10 0 -3 163.17 3.66
-10 0 -3 159.28 4.02
-10 0 -3 158.93 4.1
10 0 3 158.68 4.14
10 0 3 157.72 3.87
10 0 3 156.88 3.9
10 0 3 162.27 4.07
10 0 3 154.99 3.59
-10 0 -2 148.73 3.78
-10 0 -2 150.42 3.44
-10 0 -2 154.48 3.96
-10 0 -2 150.97 3.58
-10 0 -2 149.39 3.68
10 0 2 158.79 4.03
10 0 2 150.49 3.75
10 0 2 153.32 3.5
10 0 2 155.73 3.85
10 0 2 153.7 3.7
-10 0 -1 94.37 2.71
-10 0 -1 93.82 2.07
-10 0 -1 93.2 2.51
-10 0 -1 90.85 2.45
-10 0 -1 93.91 2.49
10 0 1 94.16 2.36
10 0 1 93.98 2.07
10 0 1 95.35 2.55
10 0 1 94.65 2.72
10 0 1 94.12 2.45
-10 0 0 259.21 5.5
-10 0 0 249.69 5.8
-10 0 0 264.71 5.47
-10 0 0 271.56 6.21
-10 0 0 259.02 5.37
10 0 0 258.52 5.89
10 0 0 266.94 5.54
10 0 0 262.18 5.57
10 0 0 276.79 6.3
10 0 0 260.38 5.43
-10 0 1 20.96 0.89
-10 0 1 21.11 0.94
-10 0 1 17.25 1.06
-10 0 1 21.43 1.01
-10 0 1 20.27 0.92
10 0 -1 17.19 1.02
10 0 -1 21.25 0.96
10 0 -1 20.7 0.89
10 0 -1 20.53 0.91
10 0 -1 19.45 0.92
-10 0 2 124.57 3.39
-10 0 2 127.78 3.15
-10 0 2 127.54 3.01
-10 0 2 124.73 2.96
-10 0 2 129.36 3.09
10 0 -2 130.93 3.02
10 0 -2 128.65 3.43
10 0 -2 127.31 2.83
10 0 -2 126.11 3.1
10 0 -2 127.21 3.09
-10 0 3 34.33 1.31
-10 0 3 35.3 1.31
-10 0 3 38.09 1.51
-10 0 3 37.76 1.31
-10 0 3 32.95 1.36
10 0 -3 37.43 0.96
10 0 -3 35.08 1.4
10 0 -3 38.97 1.53
10 0 -3 35.24 1.23
10 0 -3 36.76 1.3
-10 0 4 294.09 6.2
-10 0 4 302.73 6.96
-10 0 4 282.07 6.43
-10 0 4 290.96 6.51
10 0 -4 283.57 6.13
10 0 -4 295.05 6.41
10 0 -4 299.96 6.04
10 0 -4 268.45 6.74
-10 0 5 108.83 2.79
-10 0 5 109.51 3.13
-10 0 5 109.39 3.08
-10 0 5 103 2.8
-10 0 5 102.6 2.36
10 0 -5 108.73 2.5
10 0 -5 108.44 3.09
10 0 -5 111.92 3.14
10 0 -5 109.83 2.75
-10 0 6 3.74 0.63
-10 0 6 4.19 0.54
-10 0 6 4.59 0.7
-10 0 6 4.46 0.88
-10 0 6 4.89 0.97
-10 0 6 5.88 0.83
10 0 -6 4.81 0.68
10 0 -6 4.24 0.91
10 0 -6 4.13 0.75
-10 0 7 9.72 1.38
-10 0 7 10.09 1.27
-10 0 7 9.8 0.98
-10 0 7 9.05 1.18
-10 0 7 9.33 1.06
-10 0 7 8.77 0.74
10 0 -7 7.88 1.05
10 0 -7 9.68 0.98
10 0 -7 7.85 1.2
-10 0 8 14.73 1.78
-10 0 8 14.8 1.01
-10 0 8 13.55 1.29
-10 0 8 14.64 1.28
-10 0 8 15.94 1.45
-10 0 8 15.67 1.58
10 0 -8 14.86 1.19
10 0 -8 11.35 1.38
-10 0 9 61.42 2.71
-10 0 9 64.08 3.32
-10 0 9 63.53 2.44
-10 0 9 58.58 2.48
-10 0 9 60.22 1.99
-10 0 9 61.37 2.32
10 0 -9 59.12 2.77
10 0 -9 61.56 1.93
-10 0 10 19.07 1.46
-10 0 10 21.56 1.75
-10 0 10 25.66 2.25
-10 0 10 20.9 1.88
-10 0 10 22.22 1.93
-10 0 10 25.72 2.73
-10 0 11 -1.15 0.94
-10 0 11 -0.66 1.4
-10 0 11 -0.87 1.75
-10 0 11 -1.11 1.31
-10 0 11 0.19 1.35
-10 0 11 -0.17 1.23
-10 0 12 -1.4 2.35
-10 0 12 2.12 1.72
-10 0 12 1.32 1.92
-10 0 12 0.08 1.4
9 1 11 5.01 2.27
9 1 11 4.63 2.37
9 1 11 2.72 1.68
9 1 10 18.58 2.43
9 1 10 16.96 2.11
9 1 10 16.71 2.17
9 1 9 7.53 1.34
9 1 9 6.57 1.67
9 1 9 8.78 1.03
[truncated: 830,378 more chars]
